# Supplementary material
Source: Research Square preprint supplement (doi:10.21203/rs.3.rs-9858448/v1)
Supplement: Supplementary file 1 [file 0e81480fe3e61a6905a831eb.xlsx]

## Sheet: SF Screen_viability
Drug #	Drug Name	Concentration	PC9_R1	PC9_R2	PC9_R3	GRI_R1	GRI_R2	GRI_R3	GRIII_R1	GRIII_R2	GRIII_R3
1	Bortezomib	0.9999	0	0	0	0	0	0	0	0	0
	Bortezomib	0.449979	0	0	0	0	0	0	0	0	0
	Bortezomib	0.214995	0	0	0	0	0	0	0	0	0
	Bortezomib	0.099999	0	0	0	0	0	0	0	0	0
	Bortezomib	0.0474998	0	0	0	0	0	0	0	0	0
	Bortezomib	0.0225	0.02	0.01	0.02	0.01	0.01	0.01	0.03	0.02	0.02
	Bortezomib	0.00999999	0.76	0.65	0.76	0.28	0.44	0.29	0.75	0.81	0.69
	Bortezomib	0.005	0.97	0.98	0.98	0.89	0.91	0.94	0.98	0.97	0.98
	Bortezomib	0.0025	0.98	0.98	0.99	1	1.03	0.98	0.99	1	0.99
	Bortezomib	0.001625	0.99	1.01	1	1	1.01	0.98	1	1	0.99
2	Ixazomib	0.9999	0	0	0	0	0	0	0	0	0
	Ixazomib	0.449979	0.01	0.01	0.01	0	0.01	0	0.01	0.01	0.01
	Ixazomib	0.214995	0.36	0.34	0.4	0.29	0.3	0.32	0.61	0.57	0.56
	Ixazomib	0.099999	0.94	0.94	0.91	0.89	0.91	0.85	0.96	0.93	0.94
	Ixazomib	0.0474998	0.98	0.99	0.99	0.99	0.97	0.93	0.98	0.97	0.96
	Ixazomib	0.0225	0.98	0.99	0.99	0.99	0.98	0.87	0.99	0.97	0.95
	Ixazomib	0.00999999	0.98	0.99	0.97	0.97	1	0.92	0.98	0.96	0.97
	Ixazomib	0.005	0.99	0.99	0.97	0.98	0.98	0.93	0.99	0.97	0.99
	Ixazomib	0.0025	0.98	1	0.99	0.99	0.97	0.88	0.98	0.96	0.98
	Ixazomib	0.001625	0.99	1	0.99	0.94	0.98	0.93	0.98	0.98	0.98
3	Carfilzomib	0.9999	0	0	0	0	0	0	0	0	0
	Carfilzomib	0.449979	0	0	0	0	0	0	0	0	0
	Carfilzomib	0.214995	0.68	0.68	0.04	0	0.4	0	0.01	0.35	0.04
	Carfilzomib	0.099999	0.96	0.93	0.95	0.82	0.86	0.52	0.93	0.81	0.95
	Carfilzomib	0.0474998	0.99	0.96	0.97	0.95	0.94	0.93	0.95	0.97	0.92
	Carfilzomib	0.0225	0.99	0.98	0.97	0.94	0.95	0.95	0.99	0.99	0.96
	Carfilzomib	0.00999999	0.98	0.93	0.98	0.97	0.91	1.01	0.98	0.97	0.97
	Carfilzomib	0.005	0.99	0.99	0.98	0.95	0.93	1.01	0.98	0.98	0.98
	Carfilzomib	0.0025	1	0.96	0.98	0.97	0.92	1.01	0.98	0.98	0.99
	Carfilzomib	0.001625	0.99	0.97	0.98	0.03	0.52	1	0.98	0.97	0.99
4	Oprozomib	1.9996	0	0	0	0	0	0	0	0	0
	Oprozomib	0.949912	0	0	0	0	0	0	0	0	0
	Oprozomib	0.429981	0	0	0	0	0	0	0	0	0
	Oprozomib	0.199996	0	0	0	0	0	0	0	0	0
	Oprozomib	0.0924991	0.01	0.02	0.01	0.01	0.01	0.01	0.01	0.01	0.01
	Oprozomib	0.0424998	0.76	0.81	0.8	0.61	0.62	0.5	0.79	0.81	0.84
	Oprozomib	0.02	0.91	0.97	0.95	0.95	0.91	0.98	0.95	0.9	0.93
	Oprozomib	0.00999999	0.97	1	1	0.95	1	0.99	0.98	1	0.99
	Oprozomib	0.005	0.97	0.99	0.98	1	1.02	1	0.99	0.98	1
	Oprozomib	0.001625	1	1	0.98	0.99	1	1	0.98	1	1
5	GSK2606414	9.99001	0.69	0.67	0.66	0.17	0.12	0.13	0.33	0.18	0.17
	GSK2606414	5.99641	0.82	0.78	0.79	0.28	0.33	0.29	0.58	0.56	0.57
	GSK2606414	3.59871	0.9	0.89	0.9	0.64	0.65	0.68	0.87	0.88	0.89
	GSK2606414	2.14954	0.96	0.98	0.99	0.93	0.89	0.91	0.97	0.96	0.96
	GSK2606414	1.29983	1	0.99	1.01	0.99	1	0.99	0.99	0.99	0.99
	GSK2606414	0.749942	1	1	1	1	1	0.99	0.99	1	1
	GSK2606414	0.449979	0.98	1	1	1.01	1.01	0.99	1	1	1
	GSK2606414	0.277492	1	1.01	1.02	1.02	1	1.03	1	1.01	1.01
	GSK2606414	0.167497	1	1	1.02	1.02	1.02	1.02	1	1	1
	GSK2606414	0.099999	1	1	1.02	0.98	1.01	1.02	0.99	1.01	1.01
6	GSK2656157	9.99001	0.96	0.99	0.98	0.95	0.92	0.89	0.98	0.96	0.95
	GSK2656157	5.99641	0.99	0.98	0.99	0.96	0.96	0.96	1	0.98	0.97
	GSK2656157	3.59871	1	0.97	0.96	0.98	0.97	0.96	0.99	0.98	0.98
	GSK2656157	2.14954	1	0.97	0.99	1	0.98	0.96	0.99	0.98	0.99
	GSK2656157	1.29983	1	0.99	0.98	1.01	0.92	0.97	0.99	0.99	0.98
	GSK2656157	0.749942	1	1	1.01	1.02	0.98	0.99	0.99	0.98	0.99
	GSK2656157	0.449979	1.01	0.99	1	1.02	1.01	1	1.01	0.98	1
	GSK2656157	0.277492	1.01	0.99	1	1.04	1.01	1.01	1	1	1
	GSK2656157	0.167497	1.02	1	1.01	1	1.05	1.01	0.99	1	1.01
	GSK2656157	0.099999	1.02	1.01	1.01	1.01	1.01	1.02	1.02	1.01	1.01
7	kira6	14.9775	0.31	0.23	0.22	0.35	0.26	0.28	0.48	0.43	0.38
	kira6	10.2894	0.48	0.49	0.46	0.47	0.49	0.54	0.64	0.66	0.67
	kira6	7.04504	0.64	0.67	0.63	0.66	0.69	0.69	0.79	0.78	0.79
	kira6	4.84766	0.82	0.82	0.83	0.77	0.8	0.82	0.88	0.86	0.86
	kira6	3.29891	0.92	0.92	0.93	0.88	0.88	0.92	0.9	0.91	0.9
	kira6	2.24949	1	0.98	0.95	0.92	0.91	0.96	0.94	0.94	0.93
	kira6	1.54976	0.97	1.01	0.99	0.99	0.96	0.98	0.95	0.97	0.97
	kira6	1.04989	1	1.03	0.99	0.98	1	0.97	0.97	0.99	0.97
	kira6	0.749945	1	1.01	0.99	1.02	1.01	0.99	0.98	0.98	0.99
	kira6	0.499975	1.02	1.02	1.01	1.04	1.04	1.04	1	1.01	1
8	Epigallocatechin gallate (EGCG)	20.0099	0.96	0.95	0.96	0.97	0.97	0.96	0.93	0.93	0.97
	Epigallocatechin gallate (EGCG)	11.0877	0.98	1	1	0.95	1.01	1.03	0.97	0.98	0.98
	Epigallocatechin gallate (EGCG)	6.14621	1	1.03	0.99	0.96	1	0.99	0.98	0.98	1.02
	Epigallocatechin gallate (EGCG)	3.39884	0.99	1.01	0.99	0.99	1.05	1.02	1	1.01	1.01
	Epigallocatechin gallate (EGCG)	1.89964	1.01	1.01	1.01	1.01	1.04	1.02	1.01	1	1.01
	Epigallocatechin gallate (EGCG)	1.04989	1.01	1.01	1.02	1.01	0.99	1.05	1.01	1	1.01
	Epigallocatechin gallate (EGCG)	0.599965	1	1.01	1	1.03	1.02	1.04	1	1	1.01
	Epigallocatechin gallate (EGCG)	0.324989	1	1.02	1.01	0.99	0.99	1.05	1.01	1.01	1.01
	Epigallocatechin gallate (EGCG)	0.179997	1.01	1.01	1.01	1.02	1.01	1.04	1	1	1.02
	Epigallocatechin gallate (EGCG)	0.099999	1	1	1.02	1.02	1.04	1.02	1	1.01	1.01
9	Olaparib (AZD 2281)	9.99001	0.65	0.65	0.68	0.56	0.53	0.55	0.64	0.7	0.66
	Olaparib (AZD 2281)	5.99641	0.87	0.82	0.78	0.77	0.69	0.73	0.8	0.88	0.84
	Olaparib (AZD 2281)	3.59871	0.94	0.91	0.9	0.84	0.86	0.89	0.95	0.91	0.9
	Olaparib (AZD 2281)	2.14954	0.97	0.96	0.96	0.89	0.9	0.91	0.95	0.97	0.92
	Olaparib (AZD 2281)	1.29983	0.97	0.93	0.96	0.93	0.94	0.91	0.98	0.96	0.98
	Olaparib (AZD 2281)	0.749942	0.99	0.98	0.99	0.98	0.94	0.96	0.99	1	0.99
	Olaparib (AZD 2281)	0.449979	0.96	0.99	0.97	0.98	0.97	0.95	0.99	0.98	0.98
	Olaparib (AZD 2281)	0.277492	0.99	1.01	0.98	0.98	0.99	0.89	0.99	1	1
	Olaparib (AZD 2281)	0.167497	1	1	1	0.95	0.96	0.95	0.97	1	0.99
	Olaparib (AZD 2281)	0.099999	1	0.99	1	0.97	0.98	0.95	0.99	0.99	0.98
10	Talazoparib	20.0099	0.24	0.2	0.28	0.16	0.17	0.17	0.27	0.27	0.29
	Talazoparib	11.0877	0.41	0.28	0.4	0.36	0.26	0.29	0.42	0.35	0.42
	Talazoparib	6.14621	0.39	0.53	0.56	0.35	0.36	0.38	0.63	0.53	0.47
	Talazoparib	3.39884	0.69	0.57	0.62	0.59	0.57	0.57	0.74	0.71	0.65
	Talazoparib	1.89964	0.71	0.78	0.67	0.5	0.54	0.55	0.81	0.77	0.81
	Talazoparib	1.04989	0.83	0.82	0.81	0.63	0.65	0.71	0.83	0.79	0.83
	Talazoparib	0.599965	0.87	0.85	0.88	0.72	0.59	0.67	0.88	0.85	0.86
	Talazoparib	0.324989	0.88	0.9	0.86	0.77	0.76	0.67	0.91	0.91	0.92
	Talazoparib	0.179997	0.91	0.93	0.92	0.84	0.78	0.84	0.91	0.92	0.88
	Talazoparib	0.099999	0.91	0.94	0.94	0.89	0.77	0.86	0.94	0.95	0.95
11	Berzosertib (VE-822)	9.99001	0	0	0	0	0	0	0	0	0
	Berzosertib (VE-822)	4.64784	0	0	0	0	0	0	0	0	0
	Berzosertib (VE-822)	2.14954	0	0	0	0	0	0	0	0	0
	Berzosertib (VE-822)	0.9999	0.01	0.01	0.01	0.01	0.01	0.01	0.01	0.01	0.01
	Berzosertib (VE-822)	0.449979	0.21	0.27	0.18	0.13	0.14	0.13	0.31	0.39	0.21
	Berzosertib (VE-822)	0.214995	0.88	0.88	0.9	0.77	0.75	0.79	0.91	0.89	0.89
	Berzosertib (VE-822)	0.099999	0.97	0.97	0.98	0.9	0.91	0.97	0.95	0.96	0.96
	Berzosertib (VE-822)	0.0474998	0.99	0.99	0.99	0.92	0.96	0.98	0.98	0.97	0.99
	Berzosertib (VE-822)	0.0225	0.98	1	0.99	0.98	0.95	0.94	0.96	0.99	0.98
	Berzosertib (VE-822)	0.00999999	0.99	1	0.99	0.98	1.01	1.03	1	1.01	0.98
12	AZD 6738	9.99001	0	0	0	0	0	0	0	0	0.01
	AZD 6738	5.99641	0	0.01	0	0.01	0.01	0.01	0.01	0	0
	AZD 6738	3.59871	0.03	0.02	0.02	0.02	0.02	0.02	0.01	0.01	0.01
	AZD 6738	2.14954	0.07	0.13	0.12	0.07	0.07	0.07	0.08	0.08	0.06
	AZD 6738	1.29983	0.68	0.64	0.62	0.41	0.38	0.31	0.63	0.57	0.52
	AZD 6738	0.749942	0.94	0.92	0.97	0.85	0.9	0.87	0.9	0.93	0.93
	AZD 6738	0.449979	1	0.99	1.02	0.94	0.98	0.91	0.96	0.99	0.99
	AZD 6738	0.277492	0.99	1	1.01	0.98	1	1.03	0.98	1	1
	AZD 6738	0.167497	1	1	1.01	0.96	0.99	0.96	0.99	1	1
	AZD 6738	0.099999	1	0.99	1	0.98	1.04	1.01	1	1	1.01
13	Rabusertib (LY 2603618)	9.99001	0	0	0	0.01	0.01	0	0	0	0
	Rabusertib (LY 2603618)	5.54692	0.01	0.01	0.01	0.01	0.01	0.01	0	0	0.01
	Rabusertib (LY 2603618)	3.09905	0	0.01	0.01	0.01	0.01	0.01	0	0.01	0.01
	Rabusertib (LY 2603618)	1.69971	0.02	0.02	0.01	0.01	0.01	0.01	0.01	0.01	0.01
	Rabusertib (LY 2603618)	0.94991	0.1	0.13	0.12	0.1	0.09	0.12	0.11	0.13	0.11
	Rabusertib (LY 2603618)	0.549971	0.82	0.89	0.85	0.78	0.81	0.8	0.85	0.9	0.88
	Rabusertib (LY 2603618)	0.292491	0.97	0.98	0.99	0.98	1	0.96	0.97	0.97	0.98
	Rabusertib (LY 2603618)	0.162497	1	1.01	1.01	0.99	1.03	0.97	0.99	1	0.99
	Rabusertib (LY 2603618)	0.0899992	1.01	1.02	1.01	1	1	1.04	1	0.99	0.99
	Rabusertib (LY 2603618)	0.0499998	1	1.01	1.01	1.03	1.06	1.04	0.99	1.01	1.01
14	CHK2 inhibitor 2	9.99001	0.62	0.32	0.4	0.21	0.13	0.1	0.53	0.23	0.27
	CHK2 inhibitor 2	5.99641	0.74	0.74	0.72	0.42	0.39	0.44	0.69	0.64	0.69
	CHK2 inhibitor 2	3.59871	0.94	0.91	0.89	0.79	0.79	0.73	0.88	0.85	0.85
	CHK2 inhibitor 2	2.14954	0.98	0.97	0.96	0.91	0.89	0.89	0.94	0.96	0.92
	CHK2 inhibitor 2	1.29983	0.98	0.96	0.98	0.98	0.96	0.93	0.97	0.93	0.95
	CHK2 inhibitor 2	0.749942	1	0.99	0.99	0.99	0.99	0.97	0.99	0.96	0.97
	CHK2 inhibitor 2	0.449979	1.02	1.01	1.01	1.01	0.97	1.05	1	0.99	0.98
	CHK2 inhibitor 2	0.277492	1.01	1	1.01	0.99	1.02	0.97	0.99	1	0.99
	CHK2 inhibitor 2	0.167497	1.01	1.01	1.01	1.03	1.03	1.02	1.01	1	1
	CHK2 inhibitor 2	0.099999	1.02	1.01	1.01	1.03	1.03	1.04	1.01	1.01	1
15	CGK 733	9.99001	0.69	0.48	0.59	0.07	0.2	0.23	0.28	0.4	0.49
	CGK 733	5.99641	0.94	0.96	0.98	0.87	0.96	0.9	0.9	0.92	0.95
	CGK 733	3.59871	0.98	1.01	1	0.95	0.93	0.95	0.96	0.97	0.98
	CGK 733	2.14954	1.01	1.01	1.01	0.98	0.99	0.98	0.97	0.98	0.99
	CGK 733	1.29983	1	1	1.01	0.99	0.95	1.04	0.98	0.99	0.99
	CGK 733	0.749942	1	1.02	1	1.01	1.03	1.02	1	1.01	1
	CGK 733	0.449979	1	1.04	1.01	1.01	1.01	1.03	1	1	0.99
	CGK 733	0.277492	0.99	1.02	1.02	1.05	1.03	1.05	1	1.01	1
	CGK 733	0.167497	1.01	1.02	1.02	1.02	1.05	1.05	1.01	1.02	1.01
	CGK 733	0.099999	1.01	1.02	1.01	1.05	1.04	1.04	1.01	1.01	1
16	Torin 2	9.99001	0.02	0.01	0.01	0.01	0.01	0	0.01	0.01	0.01
	Torin 2	4.29815	0.03	0.02	0.03	0.02	0.02	0.02	0.03	0.03	0.02
	Torin 2	1.84966	0.03	0.03	0.02	0.02	0.03	0.03	0.02	0.02	0.02
	Torin 2	0.799937	0.05	0.05	0.04	0.04	0.04	0.04	0.03	0.03	0.03
	Torin 2	0.339988	0.11	0.13	0.11	0.07	0.09	0.1	0.12	0.12	0.13
	Torin 2	0.147498	0.42	0.42	0.43	0.23	0.23	0.24	0.43	0.45	0.4
	Torin 2	0.0624996	0.74	0.68	0.68	0.48	0.48	0.54	0.64	0.66	0.68
	Torin 2	0.0274999	0.88	0.87	0.86	0.77	0.73	0.63	0.8	0.81	0.84
	Torin 2	0.0125	0.97	0.98	0.98	0.93	0.95	0.95	0.97	0.95	0.94
	Torin 2	0.005	1	1	1	1.01	0.96	0.99	0.99	1	0.99
17	Etoposide	9.99001	0.07	0.07	0.05	0.05	0.05	0.02	0.04	0.03	0.02
	Etoposide	4.64784	0.1	0.09	0.1	0.09	0.06	0.07	0.07	0.07	0.06
	Etoposide	2.14954	0.23	0.25	0.21	0.08	0.1	0.06	0.12	0.12	0.13
	Etoposide	0.9999	0.73	0.71	0.7	0.16	0.22	0.22	0.33	0.3	0.36
	Etoposide	0.449979	0.96	0.94	0.92	0.76	0.74	0.76	0.89	0.89	0.89
	Etoposide	0.214995	0.99	1.01	0.99	0.93	0.94	0.91	0.99	0.96	0.99
	Etoposide	0.099999	0.99	1	1	0.96	0.99	0.97	1	0.99	0.98
	Etoposide	0.0474998	1	1.02	1	1	0.98	0.95	1	1.01	1
	Etoposide	0.0225	1	1	0.99	0.99	1.01	1	0.99	0.99	1
	Etoposide	0.00999999	0.99	1.01	1.02	1	1.02	1.01	1	1.01	1
18	5-Fluorouracil	20.0099	0.18	0.18	0.16	0.13	0.09	0.09	0.16	0.14	0.11
	5-Fluorouracil	11.0877	0.29	0.3	0.28	0.18	0.18	0.19	0.24	0.23	0.19
	5-Fluorouracil	6.14621	0.46	0.49	0.46	0.29	0.33	0.37	0.53	0.49	0.47
	5-Fluorouracil	3.39884	0.73	0.74	0.72	0.58	0.52	0.56	0.73	0.72	0.69
	5-Fluorouracil	1.89964	0.85	0.89	0.87	0.73	0.73	0.78	0.88	0.88	0.83
	5-Fluorouracil	1.04989	0.96	0.95	0.94	0.9	0.87	0.89	0.96	0.95	0.96
	5-Fluorouracil	0.599965	0.99	0.93	0.98	0.95	0.92	0.92	1	0.98	0.99
	5-Fluorouracil	0.324989	0.99	0.99	1.01	0.98	0.98	0.96	0.98	1	1
	5-Fluorouracil	0.179997	1.02	1	1	1	1	1	1.01	0.99	0.99
	5-Fluorouracil	0.099999	1.02	1	1.01	1.01	1.04	1.01	1.01	1	1
19	XL 413	9.99001	0.98	1	0.99	0.95	0.94	0.97	0.97	0.99	0.99
	XL 413	4.64784	1	1.01	1	1	0.96	0.97	0.97	0.99	1
	XL 413	2.14954	0.99	0.98	1	0.97	1.01	1	0.98	0.98	1
	XL 413	0.9999	1	1.01	1.01	0.97	0.98	1	0.98	0.99	1
	XL 413	0.449979	1	1.02	0.99	1.01	1.01	1.01	1	0.98	1
	XL 413	0.214995	1.01	1.02	1	0.99	1.03	0.99	0.99	1	1.01
	XL 413	0.099999	1	1.01	1	0.95	0.98	1	1	1.01	1.01
	XL 413	0.0474998	1.01	1.01	1	0.98	1.02	1.01	1.01	1.01	1.01
	XL 413	0.0225	1.01	1.01	1.01	0.99	1.03	0.99	1	1.01	1.01
	XL 413	0.00999999	1	1.01	1.01	1.01	1.04	1.03	1.01	1.01	1.01
20	Carboplatin	20.0099	0.09	0.08	0.08	0.06	0.06	0.06	0.1	0.11	0.11
	Carboplatin	11.0877	0.08	0.08	0.1	0.05	0.06	0.06	0.15	0.13	0.15
	Carboplatin	6.14621	0.1	0.11	0.11	0.06	0.06	0.07	0.26	0.31	0.32
	Carboplatin	3.39884	0.24	0.21	0.2	0.07	0.12	0.09	0.65	0.64	0.62
	Carboplatin	1.89964	0.57	0.65	0.64	0.24	0.22	0.24	0.94	0.92	0.96
	Carboplatin	1.04989	0.89	0.89	0.89	0.7	0.61	0.61	0.99	0.99	0.98
	Carboplatin	0.599965	0.99	0.99	0.97	0.91	0.89	0.92	1.01	1.01	1.01
	Carboplatin	0.324989	0.99	1.01	0.99	0.96	0.95	0.97	1.01	1.01	1
	Carboplatin	0.179997	1.02	1.01	1.01	1.01	0.98	1.01	1.01	1	1
	Carboplatin	0.099999	1.02	1.01	1	1.02	0.98	1.02	1	1.01	1.01
21	KU-60019	9.99001	0.73	0.76	0.67	0.47	0.45	0.43	0.57	0.52	0.54
	KU-60019	5.99641	0.87	0.88	0.87	0.74	0.76	0.78	0.8	0.79	0.79
	KU-60019	3.59871	0.93	0.94	0.91	0.85	0.88	0.84	0.91	0.9	0.91
	KU-60019	2.14954	0.97	0.96	0.95	0.91	0.96	0.92	0.97	0.94	0.95
	KU-60019	1.29983	0.97	0.99	0.98	0.98	0.99	0.98	0.97	0.97	0.95
	KU-60019	0.749942	0.97	0.99	0.98	0.96	0.98	0.96	0.99	1	0.97
	KU-60019	0.449979	0.99	0.99	0.99	1	1.01	1	0.99	0.98	0.98
	KU-60019	0.277492	1	1	0.99	1.01	1.01	1	0.99	1	0.99
	KU-60019	0.167497	0.99	1	0.99	0.97	1	0.99	0.99	0.99	0.97
	KU-60019	0.099999	0.99	1.01	0.98	0.99	0.97	0.99	0.99	0.99	0.99
22	Panobinostat	4.9975	0	0	0	0	0	0	0	0	0
	Panobinostat	1.94962	0	0	0	0	0	0	0	0	0
	Panobinostat	0.749944	0	0	0	0	0	0	0	0	0
	Panobinostat	0.292491	0	0	0	0	0	0	0	0	0
	Panobinostat	0.112499	0	0	0	0	0	0	0	0	0
	Panobinostat	0.0449998	0.08	0.06	0.08	0.03	0.04	0.03	0.02	0.02	0.01
	Panobinostat	0.0175	0.66	0.66	0.69	0.29	0.28	0.37	0.5	0.48	0.41
	Panobinostat	0.00749999	0.88	0.89	0.9	0.83	0.84	0.8	0.88	0.85	0.87
	Panobinostat	0.0025	0.97	0.94	0.97	0.93	0.92	0.87	0.95	0.9	0.93
	Panobinostat	0.001625	0.97	0.98	0.97	0.95	0.91	0.92	0.97	0.95	0.94
23	OSU 0312	9.99001	0	0	0	0	0	0	0	0	0
	OSU 0312	5.99641	0	0	0	0	0	0	0	0	0
	OSU 0312	3.59871	0.59	0.62	0.6	0.47	0.54	0.41	0.63	0.62	0.6
	OSU 0312	2.14954	0.71	0.71	0.7	0.7	0.65	0.67	0.69	0.72	0.68
	OSU 0312	1.29983	0.78	0.81	0.79	0.73	0.78	0.77	0.78	0.79	0.78
	OSU 0312	0.749942	0.9	0.88	0.9	0.86	0.87	0.84	0.82	0.85	0.87
	OSU 0312	0.449979	0.97	0.93	0.98	0.91	0.92	0.94	0.87	0.93	0.94
	OSU 0312	0.277492	0.97	0.99	0.98	0.94	0.94	0.96	0.95	0.98	0.96
	OSU 0312	0.167497	0.97	1	0.98	0.92	0.98	0.96	0.97	0.95	0.98
	OSU 0312	0.099999	0.97	0.98	0.98	0.92	0.98	0.99	0.95	0.98	0.99
24	Vorinostat	9.99001	0	0	0	0	0	0	0	0	0
	Vorinostat	5.99641	0.03	0.02	0.03	0.02	0.02	0.03	0.01	0.01	0.01
	Vorinostat	3.59871	0.13	0.12	0.11	0.07	0.06	0.08	0.06	0.07	0.08
	Vorinostat	2.14954	0.63	0.55	0.51	0.29	0.28	0.28	0.56	0.55	0.54
	Vorinostat	1.29983	0.84	0.82	0.83	0.75	0.77	0.77	0.82	0.81	0.85
	Vorinostat	0.749942	0.94	0.95	0.97	0.87	0.95	0.93	0.92	0.92	0.95
	Vorinostat	0.449979	0.96	0.94	0.97	0.96	0.99	0.99	0.95	0.97	0.97
	Vorinostat	0.277492	0.98	0.99	1.01	0.97	0.99	0.99	0.97	0.98	0.98
	Vorinostat	0.167497	1	0.98	1	0.96	1.01	1.01	0.98	0.99	1
	Vorinostat	0.099999	0.99	0.99	1	0.99	1.02	1.03	0.98	0.98	1
25	Acetazolamide	20.0099	0.99	0.99	0.98	0.99	1	1	0.99	0.98	0.98
	Acetazolamide	11.0877	1	1.01	1	0.98	1.03	1.01	0.99	0.99	0.99
	Acetazolamide	6.14621	1.01	1.01	0.99	1.01	1.02	0.98	0.99	0.99	0.99
	Acetazolamide	3.39884	1	1	1.01	1.01	1.01	0.95	1	0.99	1
	Acetazolamide	1.89964	1.01	1	1	1	1	1.01	0.99	1.01	0.99
	Acetazolamide	1.04989	1	1.02	0.99	1	0.95	1.05	1.01	0.99	1
	Acetazolamide	0.599965	1	1.01	1	1.02	0.99	1	1	1.01	1
	Acetazolamide	0.324989	1.01	1.02	1.02	1	1.02	1.02	0.99	1	0.99
	Acetazolamide	0.179997	1	0.99	1	1.04	1.04	1.02	1	1	0.99
	Acetazolamide	0.099999	1.01	1.02	1	1	1.03	1.02	1	1	1
26	Decitabine	9.99001	0.28	0.29	0.27	0.21	0.15	0.2	0.2	0.17	0.15
	Decitabine	5.99641	0.27	0.25	0.26	0.18	0.17	0.18	0.22	0.16	0.16
	Decitabine	3.59871	0.31	0.38	0.26	0.24	0.21	0.18	0.26	0.2	0.2
	Decitabine	2.14954	0.43	0.38	0.4	0.24	0.26	0.2	0.33	0.32	0.32
	Decitabine	1.29983	0.46	0.41	0.48	0.39	0.3	0.33	0.47	0.47	0.38
	Decitabine	0.749942	0.59	0.53	0.56	0.49	0.49	0.41	0.68	0.66	0.63
	Decitabine	0.449979	0.73	0.76	0.7	0.69	0.68	0.65	0.77	0.79	0.74
	Decitabine	0.277492	0.83	0.84	0.85	0.81	0.81	0.81	0.9	0.89	0.91
	Decitabine	0.167497	0.93	0.93	0.92	0.95	0.91	0.87	0.94	0.96	0.95
	Decitabine	0.099999	0.98	0.99	0.93	0.92	0.87	0.93	1	0.98	1
27	BAY 1217389	4.9975	0.11	0.1	0.13	0.03	0.03	0.04	0.06	0.07	0.08
	BAY 1217389	1.94962	0.1	0.12	0.14	0.04	0.03	0.04	0.1	0.09	0.12
	BAY 1217389	0.749944	0.16	0.16	0.18	0.06	0.08	0.06	0.1	0.11	0.11
	BAY 1217389	0.292491	0.14	0.2	0.22	0.06	0.09	0.08	0.11	0.1	0.15
	BAY 1217389	0.112499	0.17	0.18	0.18	0.06	0.09	0.12	0.14	0.15	0.16
	BAY 1217389	0.0449998	0.2	0.21	0.17	0.08	0.09	0.1	0.15	0.17	0.14
	BAY 1217389	0.0175	0.2	0.23	0.2	0.06	0.12	0.08	0.15	0.2	0.11
	BAY 1217389	0.00749999	0.55	0.63	0.64	0.19	0.26	0.23	0.16	0.11	0.14
	BAY 1217389	0.0025	0.99	1	0.98	0.93	0.89	0.9	0.87	0.93	0.88
	BAY 1217389	0.001625	1	1.01	1.01	1.02	0.96	0.98	1	1	1
28	Volasertib	9.99001	0	0	0	0	0	0.01	0	0	0
	Volasertib	4.64784	0.01	0.02	0.01	0.02	0.02	0.02	0.02	0.02	0.02
	Volasertib	2.14954	0.05	0.05	0.06	0.05	0.06	0.05	0.06	0.06	0.06
	Volasertib	0.9999	0.06	0.09	0.09	0.09	0.11	0.1	0.07	0.09	0.08
	Volasertib	0.449979	0.1	0.11	0.11	0.08	0.1	0.11	0.07	0.08	0.07
	Volasertib	0.214995	0.12	0.1	0.1	0.08	0.08	0.09	0.08	0.06	0.07
	Volasertib	0.099999	0.17	0.11	0.15	0.06	0.07	0.08	0.11	0.1	0.1
	Volasertib	0.0474998	0.28	0.25	0.24	0.14	0.12	0.11	0.31	0.26	0.25
	Volasertib	0.0225	0.96	0.97	0.92	0.86	0.88	0.72	0.94	0.98	0.98
	Volasertib	0.00999999	1	1	1	0.95	0.99	0.92	1.01	1	1
29	Alisertib	9.99001	0.05	0.02	0.02	0.04	0.04	0.05	0.05	0.05	0.06
	Alisertib	4.29815	0.06	0.1	0.1	0.07	0.05	0.04	0.1	0.08	0.1
	Alisertib	1.84966	0.12	0.1	0.12	0.07	0.06	0.05	0.08	0.12	0.11
	Alisertib	0.799937	0.11	0.11	0.1	0.06	0.05	0.08	0.1	0.15	0.12
	Alisertib	0.339988	0.09	0.14	0.17	0.06	0.06	0.07	0.09	0.08	0.09
	Alisertib	0.147498	0.57	0.6	0.63	0.32	0.25	0.28	0.16	0.17	0.16
	Alisertib	0.0624996	0.94	0.95	0.96	0.94	0.92	0.87	0.86	0.84	0.84
	Alisertib	0.0274999	0.97	0.98	0.99	0.95	0.99	0.91	0.99	0.97	0.95
	Alisertib	0.0125	0.99	1	0.98	0.98	0.96	0.93	0.99	1	0.98
	Alisertib	0.005	1	0.98	0.99	1	1	0.98	0.99	0.99	0.99
30	Barasertib	9.99001	0.2	0.2	0.2	0.06	0.09	0.07	0.15	0.14	0.11
	Barasertib	4.29815	0.2	0.13	0.2	0.09	0.11	0.07	0.13	0.12	0.15
	Barasertib	1.84966	0.17	0.16	0.21	0.09	0.09	0.08	0.16	0.12	0.13
	Barasertib	0.799937	0.27	0.27	0.22	0.1	0.09	0.07	0.13	0.12	0.1
	Barasertib	0.339988	0.68	0.63	0.59	0.08	0.08	0.11	0.13	0.1	0.14
	Barasertib	0.147498	0.9	0.87	0.91	0.07	0.08	0.09	0.09	0.13	0.15
	Barasertib	0.0624996	1	0.98	0.96	0.08	0.06	0.08	0.13	0.14	0.1
	Barasertib	0.0274999	1	0.98	0.99	0.14	0.22	0.17	0.25	0.19	0.16
	Barasertib	0.0125	0.99	0.98	0.99	0.9	0.9	0.82	0.94	0.92	0.91
	Barasertib	0.005	0.99	0.98	0.99	0.98	0.98	0.99	0.98	0.96	0.98
31	Tozasertib	9.99001	0.04	0.04	0.02	0.01	0.02	0.02	0.01	0.02	0.02
	Tozasertib	4.29815	0.08	0.13	0.1	0.05	0.04	0.05	0.1	0.11	0.1
	Tozasertib	1.84966	0.17	0.17	0.15	0.06	0.07	0.06	0.09	0.14	0.1
	Tozasertib	0.799937	0.18	0.24	0.2	0.07	0.07	0.07	0.1	0.13	0.14
	Tozasertib	0.339988	0.26	0.28	0.22	0.13	0.11	0.1	0.13	0.16	0.12
	Tozasertib	0.147498	0.87	0.92	0.94	0.11	0.1	0.11	0.2	0.17	0.22
	Tozasertib	0.0624996	0.99	1	0.99	0.94	0.92	0.92	0.96	0.96	0.95
	Tozasertib	0.0274999	0.99	0.99	0.99	0.95	0.94	0.99	0.97	0.98	1
	Tozasertib	0.0125	0.98	1	0.98	0.94	0.96	0.96	0.95	0.98	0.98
	Tozasertib	0.005	0.98	1	1	0.97	0.98	1	0.96	0.97	1.01
32	YM 155	4.9975	0	0	0	0	0	0	1.01	1	1
	YM 155	1.94962	0	0	0	0	0	0	1	1	1.01
	YM 155	0.749944	0	0	0	0	0	0	0.99	1.01	1
	YM 155	0.292491	0	0	0.01	0	0	0	0.99	1	1
	YM 155	0.112499	0.01	0.01	0.01	0	0	0	1	0.98	1
	YM 155	0.0449998	0.05	0.05	0.05	0.01	0.01	0.01	1	1	1
	YM 155	0.0175	0.3	0.4	0.34	0.03	0.02	0.02	1	0.99	0.98
	YM 155	0.00749999	0.95	0.96	0.97	0.18	0.16	0.15	1	1.02	1
	YM 155	0.0025	0.98	0.98	0.98	0.55	0.59	0.61	0.99	1	1
	YM 155	0.001625	1.01	1	1	0.83	0.83	0.94	0.98	0.99	0.99
33	BI 2536	4.9975	0	0	0	0	0.01	0	0	0	0
	BI 2536	1.94962	0.04	0.03	0.03	0.03	0.03	0.03	0.03	0.03	0.03
	BI 2536	0.749944	0.08	0.07	0.07	0.09	0.07	0.06	0.07	0.07	0.06
	BI 2536	0.292491	0.09	0.11	0.08	0.08	0.1	0.09	0.06	0.08	0.08
	BI 2536	0.112499	0.07	0.08	0.08	0.07	0.08	0.07	0.07	0.06	0.07
	BI 2536	0.0449998	0.07	0.08	0.07	0.08	0.05	0.07	0.06	0.06	0.06
	BI 2536	0.0175	0.09	0.1	0.1	0.06	0.05	0.05	0.06	0.06	0.09
	BI 2536	0.00749999	0.88	0.91	0.84	0.39	0.47	0.41	0.71	0.67	0.66
	BI 2536	0.0025	0.99	0.98	0.99	0.87	0.92	0.93	0.99	0.99	0.95
	BI 2536	0.001625	1	1.01	1.01	1	0.94	0.97	1	0.99	0.99
34	Chloroquine	20.0099	0	0	0	0	0	0	0	0	0
	Chloroquine	11.0877	0.05	0.05	0.03	0.03	0.03	0.03	0.02	0.03	0.02
	Chloroquine	6.14621	0.18	0.16	0.1	0.06	0.09	0.1	0.08	0.09	0.07
	Chloroquine	3.39884	0.19	0.27	0.15	0.11	0.09	0.09	0.13	0.15	0.12
	Chloroquine	1.89964	0.46	0.48	0.32	0.15	0.13	0.23	0.24	0.28	0.23
	Chloroquine	1.04989	0.98	0.97	0.98	0.89	0.92	0.92	0.97	0.97	0.97
	Chloroquine	0.599965	1.01	1	1	1.01	0.99	0.99	1.01	0.99	0.99
	Chloroquine	0.324989	1	1	1	1.02	1.01	1	1.01	1.01	1
	Chloroquine	0.179997	1	1.01	1	1.02	1	1.02	1	1	1
	Chloroquine	0.099999	1.01	1.02	1.01	1.02	1.02	1.04	1.01	1	1
35	Depagliflozin	20.0099	0.98	0.99	0.99	0.95	0.93	0.96	0.94	0.96	0.98
	Depagliflozin	13.2823	0.99	0.99	1	0.97	0.96	0.97	0.98	0.99	0.99
	Depagliflozin	8.79225	0.98	1	1	0.92	0.99	0.95	0.99	0.98	0.99
	Depagliflozin	5.84658	0.99	1	1	0.92	0.98	0.98	0.98	0.98	0.98
	Depagliflozin	3.89849	0.98	1.01	1.01	0.97	0.99	1	0.99	1	1
	Depagliflozin	2.59933	0.99	1.01	1.01	1.01	1	0.99	0.99	1	0.98
	Depagliflozin	1.69971	1	1.02	1	1.02	0.99	0.97	1	1	1
	Depagliflozin	1.14987	1.01	1	1	0.99	1.02	1.01	1	1.01	1
	Depagliflozin	0.749944	1	1	1.01	1.01	1.03	1.02	0.99	1.01	1.01
	Depagliflozin	0.499975	1.01	1.03	1.01	0.99	1.02	1.02	1.01	1.01	1
36	Rapamycin	9.99001	0.84	0.8	0.79	0.61	0.65	0.57	0.73	0.7	0.7
	Rapamycin	4.29815	0.84	0.81	0.84	0.66	0.66	0.73	0.78	0.79	0.71
	Rapamycin	1.84966	0.83	0.83	0.84	0.54	0.75	0.73	0.79	0.75	0.8
	Rapamycin	0.799937	0.87	0.81	0.83	0.73	0.74	0.7	0.81	0.81	0.84
	Rapamycin	0.339988	0.87	0.84	0.86	0.72	0.77	0.72	0.87	0.84	0.83
	Rapamycin	0.147498	0.82	0.85	0.86	0.76	0.74	0.79	0.87	0.82	0.85
	Rapamycin	0.0624996	0.85	0.86	0.81	0.71	0.75	0.78	0.83	0.84	0.82
	Rapamycin	0.0274999	0.86	0.89	0.86	0.73	0.71	0.77	0.88	0.87	0.88
	Rapamycin	0.0125	0.86	0.87	0.89	0.77	0.79	0.78	0.86	0.85	0.87
	Rapamycin	0.005	0.9	0.89	0.88	0.7	0.75	0.72	0.85	0.86	0.86
37	Quercetin	24.9874	0.94	0.97	0.95	0.92	0.96	0.96	0.92	0.94	0.93
	Quercetin	16.1738	0.98	0.99	0.97	0.96	0.98	0.97	0.95	0.97	0.97
	Quercetin	10.489	0.98	1.01	0.98	0.99	0.99	0.98	0.95	0.97	0.97
	Quercetin	6.79539	0.99	1	0.98	0.97	1	0.98	0.99	0.99	0.98
	Quercetin	4.39807	0.97	1.01	0.98	0.99	1.01	0.99	0.98	0.99	0.98
	Quercetin	2.84919	1	1	0.99	0.98	0.94	1	0.98	1.01	1
	Quercetin	1.84966	0.99	1	0.98	0.97	1.01	1	0.98	1	0.99
	Quercetin	1.19986	0.99	1.01	0.99	1	1.01	1	0.99	1	0.99
	Quercetin	0.749942	0.99	0.99	0.99	0.98	0.99	0.97	1	1	1
	Quercetin	0.499975	0.99	0.99	1.01	0.96	1	0.98	1	1.01	1
38	CB 839	9.99001	0.68	0.67	0.61	0.52	0.57	0.57	0.43	0.43	0.48
	CB 839	4.64784	0.66	0.61	0.69	0.59	0.53	0.59	0.58	0.57	0.49
	CB 839	2.14954	0.62	0.59	0.59	0.41	0.33	0.34	0.49	0.47	0.48
	CB 839	0.9999	0.5	0.5	0.54	0.31	0.32	0.26	0.37	0.4	0.43
	CB 839	0.449979	0.56	0.57	0.54	0.45	0.45	0.42	0.35	0.43	0.42
	CB 839	0.214995	0.65	0.66	0.67	0.66	0.67	0.66	0.5	0.5	0.51
	CB 839	0.099999	0.89	0.91	0.88	0.95	0.94	0.99	0.8	0.79	0.76
	CB 839	0.0474998	0.99	0.98	0.99	0.99	0.96	0.97	0.97	0.96	0.96
	CB 839	0.0225	0.98	1	0.99	0.99	1	0.96	0.98	0.99	0.99
	CB 839	0.00999999	1	1.01	1	1.01	0.99	1	0.99	1	0.99
39	ND 646	20.0099	0.94	0.92	0.91	0.78	0.71	0.73	0.86	0.87	0.87
	ND 646	11.0877	0.96	0.94	0.94	0.93	0.91	0.86	0.92	0.91	0.91
	ND 646	6.14621	0.96	0.95	0.93	0.95	0.9	0.91	0.91	0.92	0.9
	ND 646	3.39884	0.96	0.95	0.96	0.94	0.91	0.92	0.91	0.89	0.9
	ND 646	1.89964	0.95	0.94	0.96	0.91	0.93	0.89	0.89	0.91	0.91
	ND 646	1.04989	0.97	0.96	0.96	0.93	0.92	0.9	0.9	0.9	0.89
	ND 646	0.599965	0.97	0.95	0.95	0.92	0.91	0.89	0.91	0.89	0.89
	ND 646	0.324989	0.95	0.94	0.94	0.94	0.9	0.9	0.9	0.9	0.91
	ND 646	0.179997	0.93	0.92	0.96	0.9	0.9	0.87	0.9	0.91	0.89
	ND 646	0.099999	0.96	0.96	0.96	0.94	0.93	0.89	0.93	0.92	0.92
40	Compound 3k	9.99001	0	0	0	0	0	0	0	0	0
	Compound 3k	4.64784	0	0	0	0	0	0	0	0	0
	Compound 3k	2.14954	0	0	0	0	0	0	0	0.01	0
	Compound 3k	0.9999	0	0	0	0	0	0	0	0.01	0
	Compound 3k	0.449979	0.07	0.08	0.05	0.09	0.09	0.03	0.02	0.14	0.03
	Compound 3k	0.214995	0.66	0.78	0.91	0.68	0.81	0.84	0.92	0.91	0.89
	Compound 3k	0.099999	0.98	1	0.99	1	0.98	0.97	0.99	0.99	0.98
	Compound 3k	0.0474998	1	1	1	0.96	0.96	0.96	0.98	0.99	0.98
	Compound 3k	0.0225	0.99	0.99	0.99	0.98	1.01	0.89	0.97	1	1
	Compound 3k	0.00999999	1.01	1.01	1.01	0.97	0.97	0.93	0.99	0.98	1
41	AZD 8055	9.99001	0.09	0.06	0.06	0.1	0.09	0.09	0.11	0.07	0.09
	AZD 8055	4.64784	0.19	0.16	0.16	0.17	0.16	0.14	0.19	0.22	0.17
	AZD 8055	2.14954	0.26	0.25	0.22	0.18	0.15	0.19	0.27	0.24	0.21
	AZD 8055	0.9999	0.29	0.29	0.29	0.19	0.19	0.16	0.27	0.27	0.26
	AZD 8055	0.449979	0.38	0.34	0.34	0.25	0.25	0.25	0.34	0.28	0.33
	AZD 8055	0.214995	0.5	0.43	0.43	0.28	0.3	0.34	0.42	0.45	0.42
	AZD 8055	0.099999	0.61	0.61	0.66	0.49	0.35	0.37	0.62	0.61	0.59
	AZD 8055	0.0474998	0.79	0.78	0.77	0.64	0.57	0.6	0.76	0.77	0.74
	AZD 8055	0.0225	0.91	0.87	0.9	0.79	0.78	0.87	0.87	0.89	0.93
	AZD 8055	0.00999999	0.98	0.95	0.98	0.89	0.89	0.85	0.95	0.97	0.98
42	ABT-737	9.99001	1	1	1.01	0.89	0.84	0.88	1	0.98	0.97
	ABT-737	4.64784	1.01	1.02	1.01	0.97	0.95	0.99	0.99	0.97	0.98
	ABT-737	2.14954	1	0.99	1.01	1.01	0.98	1.01	1	0.99	0.99
	ABT-737	0.9999	1.02	1	1	0.99	1.01	1	0.99	0.99	0.98
	ABT-737	0.449979	1	0.99	1.01	1.03	0.97	0.96	0.99	0.99	0.99
	ABT-737	0.214995	1	0.99	1.01	1	0.98	0.99	1.01	0.99	0.98
	ABT-737	0.099999	1.01	0.98	1	1	0.99	0.96	0.99	0.99	0.99
	ABT-737	0.0474998	1	0.99	1	0.93	0.97	0.96	1	0.98	0.99
	ABT-737	0.0225	1	0.99	0.98	0.97	0.96	0.96	0.99	0.99	0.97
	ABT-737	0.00999999	1	1	1	0.93	0.97	0.95	0.99	0.99	0.98
43	ABT-263	9.99001	0.98	1.01	1.01	0.99	1.02	1.02	1	1	1
	ABT-263	4.64784	1	1.01	1	1.02	1.04	0.99	1	1.01	1
	ABT-263	2.14954	0.99	1.01	0.99	0.99	1.01	1.03	1	1.01	1
	ABT-263	0.9999	1.01	1.02	1.01	0.99	1.01	0.99	1	1	0.99
	ABT-263	0.449979	1	1	0.99	0.98	1.02	0.98	0.99	0.99	1
	ABT-263	0.214995	0.99	1	0.98	0.99	1.02	0.98	0.99	1.01	1.02
	ABT-263	0.099999	0.98	1	0.99	0.91	1	1	0.99	1.01	1
	ABT-263	0.0474998	0.99	0.99	0.99	0.97	0.99	0.98	0.99	0.99	1
	ABT-263	0.0225	0.99	1	0.99	0.95	0.95	1	0.98	1	0.99
	ABT-263	0.00999999	0.99	1	1	0.95	1	0.97	0.97	0.99	1
44	ABT-199	9.99001	1.02	1.01	1.02	0.98	1.02	1.03	1.01	0.99	1
	ABT-199	4.64784	1.01	1.01	1.01	1.01	0.99	1.01	1	1.01	1
	ABT-199	2.14954	1.01	1	1.01	1.03	1.02	1.04	1	1	1.01
	ABT-199	0.9999	1.02	1.01	1.01	1.03	1.01	1.06	1	1.01	1.01
	ABT-199	0.449979	1.01	1	1.01	0.99	0.99	1.03	1	0.99	1
	ABT-199	0.214995	1	1	1.03	1.02	1.02	1.01	1	1.01	1.01
	ABT-199	0.099999	1	1	1.01	1.01	0.98	1.03	1.01	1.01	1.01
	ABT-199	0.0474998	1.01	0.99	1.01	1.03	1.01	1	1	1	1
	ABT-199	0.0225	1	0.99	1	1.02	1.04	0.99	1.01	1	1
	ABT-199	0.00999999	1	1	1.01	1	1.02	1.01	1.01	1	1.01
45	Gefitinib	9.99001	0	0	0	0	0	0	0	0	0
	Gefitinib	3.89849	0.03	0.03	0.03	0.79	0.78	0.74	0.81	0.79	0.82
	Gefitinib	1.49977	0.07	0.07	0.07	0.97	1	0.93	0.97	0.97	0.97
	Gefitinib	0.599965	0.1	0.08	0.09	0.98	1	0.99	0.99	1	1
	Gefitinib	0.227495	0.07	0.09	0.08	0.98	1	1	0.99	0.99	0.99
	Gefitinib	0.0874992	0.11	0.11	0.11	0.97	0.98	1.01	0.99	0.99	1
	Gefitinib	0.0349999	0.29	0.3	0.35	1.02	1	0.98	0.99	0.99	0.99
	Gefitinib	0.0125	0.86	0.84	0.9	1	1.01	1.02	1	1	0.99
	Gefitinib	0.005	0.98	1	1	0.98	1	1.02	0.97	1	1
	Gefitinib	0.001625	1	1.01	1	0.98	0.99	1.02	1	1.01	1

## Sheet: SF Screen_vulnerabilities
drugNr	drugName	PC9_r1	PC9_r2	PC9_r3	GRI_r1	GRI_r2	GRI_r3	GRIII_r1	GRIII_r2	GRIII_r3	GRI,min,PC9_r1	GRI,min,PC9_r2	GRI,min,PC9_r3	GRI,min,PC9_median	GRI,min,PC9_pvalue	GRI,min,PC9_fdr	GRIII,min,PC9_r1	GRIII,min,PC9_r2	GRIII,min,PC9_r3	GRIII,min,PC9_median	GRIII,min,PC9_pvalue	GRIII,min,PC9_fdr	diff,median
26	Barasertib	2.146	2.082	2.104	0.772	0.816	0.755	0.953	0.902	0.884	-1.374	-1.266	-1.349	-1.349	4.51622e-07	1.01615e-05	-1.193	-1.18	-1.22	-1.193	9.7272e-07	3.11179e-05	-1.271
23	BAY 1217389	1.07	1.149	1.166	0.639	0.693	0.684	0.73	0.686	0.723	-0.431	-0.456	-0.482	-0.456	0.000341528	0.00186002	-0.34	-0.463	-0.443	-0.443	0.00070889	0.00531668	-0.4495
27	Tozasertib	1.847	1.912	1.864	1.404	1.384	1.388	1.494	1.52	1.512	-0.443	-0.528	-0.476	-0.476	0.000342111	0.00186002	-0.353	-0.392	-0.352	-0.353	0.000446359	0.00401723	-0.4145
37	Etoposide	2.184	2.176	2.154	1.85	1.857	1.844	1.964	1.95	1.967	-0.334	-0.319	-0.31	-0.319	7.06147e-05	0.000572478	-0.22	-0.226	-0.187	-0.22	8.19949e-05	0.00122992	-0.2695
41	CB 839	2.249	2.235	2.237	2.057	2.03	2.045	1.925	1.944	1.934	-0.192	-0.205	-0.192	-0.192	7.63304e-05	0.000572478	-0.324	-0.291	-0.303	-0.303	1.38302e-06	3.11179e-05	-0.2475
32	Rapamycin	2.819	2.789	2.793	2.289	2.413	2.408	2.732	2.686	2.699	-0.53	-0.376	-0.385	-0.385	0.00322254	0.00646518	-0.087	-0.103	-0.094	-0.094	0.00335409	0.0137213	-0.2395
25	Alisertib	1.624	1.645	1.671	1.483	1.436	1.427	1.424	1.439	1.434	-0.141	-0.209	-0.244	-0.209	0.000549097	0.00190072	-0.2	-0.206	-0.237	-0.206	0.000960259	0.00617309	-0.2075
44	AZD 8055	1.47	1.394	1.412	1.155	1.069	1.115	1.41	1.397	1.375	-0.315	-0.325	-0.297	-0.315	0.000393302	0.00186002	-0.06	0.003	-0.037	-0.037	0.153622	0.259474	-0.176
29	BI 2536	0.955	0.876	1.063	0.711	0.758	0.728	0.856	0.848	0.859	-0.244	-0.118	-0.335	-0.244	0.0215874	0.0323811	-0.099	-0.028	-0.204	-0.099	0.0891432	0.190048	-0.1715
5	GSK2606414	1.892	1.883	1.89	1.65	1.647	1.654	1.798	1.781	1.785	-0.242	-0.236	-0.236	-0.236	3.32235e-07	1.01615e-05	-0.094	-0.102	-0.105	-0.102	0.000193226	0.00217379	-0.169
3	Carfilzomib	2.166	2.17	1.949	1.861	2.039	1.782	1.91	2.004	1.949	-0.305	-0.131	-0.167	-0.167	0.0646359	0.0847763	-0.256	-0.166	0	-0.166	0.0924692	0.190048	-0.1665
18	Panobinostat	1.104	1.101	1.124	0.896	0.899	0.899	1.005	0.979	0.955	-0.208	-0.202	-0.225	-0.208	0.000480765	0.00190072	-0.099	-0.122	-0.169	-0.122	0.00214815	0.0107408	-0.165
16	Torin 2	1.383	1.351	1.343	1.122	1.116	1.108	1.302	1.32	1.317	-0.261	-0.235	-0.235	-0.235	0.000527436	0.00190072	-0.081	-0.031	-0.026	-0.031	0.0231915	0.0869682	-0.133
10	Talazoparib	1.608	1.602	1.62	1.349	1.272	1.332	1.737	1.656	1.663	-0.259	-0.33	-0.288	-0.288	0.00228429	0.00541017	0.129	0.054	0.043	0.054	0.95238	0.999996	-0.117
30	Chloroquine	1.349	1.36	1.294	1.204	1.209	1.24	1.263	1.279	1.256	-0.145	-0.151	-0.054	-0.145	0.00702203	0.0121535	-0.086	-0.081	-0.038	-0.081	0.0333097	0.115211	-0.113
42	ND 646	2.198	2.17	2.18	2.106	2.062	2.019	2.078	2.076	2.069	-0.092	-0.108	-0.161	-0.108	0.0155156	0.0240759	-0.12	-0.094	-0.111	-0.111	0.00141572	0.00796345	-0.1095
14	CHK2 inhibitor 2	1.885	1.845	1.84	1.719	1.699	1.679	1.836	1.785	1.797	-0.166	-0.146	-0.161	-0.161	0.000604018	0.00194149	-0.049	-0.06	-0.043	-0.049	0.0367308	0.115211	-0.105
38	5-Fluorouracil	1.754	1.771	1.747	1.582	1.551	1.593	1.769	1.747	1.707	-0.172	-0.22	-0.154	-0.172	0.000413337	0.00186002	0.015	-0.024	-0.04	-0.024	0.236045	0.331938	-0.098
22	Decitabine (5-aza-2?-deoxycytidine)	1.145	1.131	1.114	1.007	0.96	0.933	1.146	1.116	1.073	-0.138	-0.171	-0.181	-0.171	0.00437652	0.00820597	0.001	-0.015	-0.041	-0.015	0.244835	0.333866	-0.093
1	Bortezomib	0.872	0.833	0.871	0.695	0.755	0.716	0.874	0.886	0.85	-0.177	-0.078	-0.155	-0.155	0.0021993	0.00541017	0.002	0.053	-0.021	0.002	0.7328	0.891243	-0.0765
24	Volasertib	0.754	0.747	0.728	0.628	0.644	0.593	0.724	0.732	0.727	-0.126	-0.103	-0.135	-0.126	0.00282397	0.00605136	-0.03	-0.015	-0.001	-0.015	0.0897895	0.190048	-0.0705
12	AZD 6738	1.167	1.162	1.16	1.068	1.078	1.049	1.15	1.133	1.119	-0.099	-0.084	-0.111	-0.099	0.00260418	0.0058594	-0.017	-0.029	-0.041	-0.029	0.0384037	0.115211	-0.064
34	ABT-737	3.012	2.98	2.994	2.916	2.953	2.898	2.984	2.958	2.946	-0.096	-0.027	-0.096	-0.096	0.0133107	0.0213921	-0.028	-0.022	-0.048	-0.028	0.0452205	0.127183	-0.062
17	KU-60019	1.911	1.921	1.901	1.822	1.851	1.833	1.878	1.864	1.864	-0.089	-0.07	-0.068	-0.07	0.00143268	0.0040294	-0.033	-0.057	-0.037	-0.037	0.00266034	0.0119715	-0.0535
20	Vorinostat	1.363	1.329	1.323	1.226	1.241	1.244	1.321	1.316	1.328	-0.137	-0.088	-0.079	-0.088	0.00330443	0.00646518	-0.042	-0.013	0.005	-0.013	0.155684	0.259474	-0.0505
19	OSU 0312	1.455	1.486	1.457	1.381	1.405	1.374	1.445	1.459	1.438	-0.074	-0.081	-0.083	-0.081	0.00225526	0.00541017	-0.01	-0.027	-0.019	-0.019	0.100947	0.193313	-0.05
4	Oprozomib	1.493	1.713	1.499	1.45	1.45	1.416	1.497	1.505	1.511	-0.043	-0.263	-0.083	-0.083	0.106373	0.125968	0.004	-0.208	0.012	0.004	0.234908	0.331938	-0.0395
9	Olaparib (AZD 2281)	1.913	1.879	1.874	1.812	1.794	1.801	1.894	1.908	1.88	-0.101	-0.085	-0.073	-0.085	0.00506613	0.00911903	-0.019	0.029	0.006	0.006	0.631296	0.78912	-0.0395
15	CGK 733	1.956	1.951	1.967	1.873	1.926	1.909	1.915	1.931	1.949	-0.083	-0.025	-0.058	-0.058	0.0304355	0.0427999	-0.041	-0.02	-0.018	-0.02	0.0490472	0.129831	-0.039
39	XL 413	2.996	3.025	2.997	2.945	2.977	2.98	2.969	2.978	2.998	-0.051	-0.048	-0.017	-0.048	0.0298094	0.0427999	-0.027	-0.047	0.001	-0.027	0.065393	0.163483	-0.0375
31	Depagliflozin	1.588	1.61	1.601	1.56	1.583	1.581	1.587	1.59	1.589	-0.028	-0.027	-0.02	-0.027	0.031706	0.0432355	-0.001	-0.02	-0.012	-0.012	0.112729	0.202912	-0.0195
6	GSK2656157	1.993	1.98	1.98	1.98	1.944	1.954	1.987	1.971	1.975	-0.013	-0.036	-0.026	-0.026	0.0659371	0.0847763	-0.006	-0.009	-0.005	-0.006	0.180885	0.290708	-0.016
11	Berzosertib (VE-822)	1.525	1.545	1.524	1.455	1.45	1.463	1.568	1.589	1.529	-0.07	-0.095	-0.061	-0.07	0.00100531	0.00301593	0.043	0.044	0.005	0.043	0.891763	0.999996	-0.0135
33	Quercetin	1.673	1.695	1.669	1.658	1.685	1.674	1.658	1.679	1.671	-0.015	-0.01	0.005	-0.01	0.292833	0.337884	-0.015	-0.016	0.002	-0.015	0.199004	0.298506	-0.0125
13	Rabusertib (LY 2603618)	1.144	1.174	1.158	1.136	1.141	1.144	1.15	1.101	1.163	-0.008	-0.033	-0.014	-0.014	0.0807567	0.100946	0.006	-0.073	0.005	0.005	0.198806	0.298506	-0.0045
21	Acetazolamide	2.3	2.318	2.295	2.302	2.323	2.328	2.292	2.292	2.288	0.002	0.005	0.033	0.005	0.861152	0.901206	-0.008	-0.026	-0.007	-0.008	0.0929126	0.190048	-0.0015
8	Epigallocatechin gallate (EGCG)	2.291	2.325	2.298	2.273	2.335	2.357	2.28	2.285	2.293	-0.018	0.01	0.059	0.01	0.70928	0.759943	-0.011	-0.04	-0.005	-0.011	0.1031	0.193313	-0.0005
36	ABT-199	3.023	2.994	3.036	3.041	3.022	3.065	3.009	3.006	3.015	0.018	0.028	0.029	0.028	0.886016	0.906153	-0.014	0.012	-0.021	-0.014	0.301352	0.398849	0.007
40	Carboplatin	1.381	1.403	1.401	1.169	1.141	1.149	1.667	1.669	1.675	-0.212	-0.262	-0.252	-0.252	1.52129e-05	0.000228194	0.286	0.266	0.274	0.274	0.999905	0.999996	0.011
2	Ixazomib	2.061	2.055	2.064	2.016	2.029	2.004	2.152	2.136	2.133	-0.045	-0.026	-0.06	-0.045	0.00846213	0.0141035	0.091	0.081	0.069	0.081	0.999185	0.999996	0.018
7	kira6	1.227	1.228	1.214	1.207	1.21	1.236	1.285	1.285	1.284	-0.02	-0.018	0.022	-0.018	0.319965	0.35996	0.058	0.057	0.07	0.058	0.997445	0.999996	0.02
43	Compound 3k	1.397	1.441	1.474	1.411	1.455	1.436	1.621	1.517	1.453	0.014	0.014	-0.038	0.014	0.452263	0.496386	0.224	0.076	-0.021	0.076	0.905538	0.999996	0.045
28	YM 155	0.968	1.005	0.994	0.341	0.338	0.349	3.477	3.485	3.478	-0.627	-0.667	-0.645	-0.645	4.80866e-05	0.000540974	2.509	2.48	2.484	2.484	0.999996	0.999996	0.9195
45	Gefitinib	1.311	1.307	1.358	3.458	3.449	3.41	3.474	3.465	3.477	2.147	2.142	2.052	2.142	1	1	2.163	2.158	2.119	2.158	0.999986	0.999996	2.15
35	ABT-263	NA	3.015	2.982	2.929	2.982	2.969	2.974	2.997	3	NA	-0.033	-0.013	NA	0.102809	0.125038	NA	-0.018	0.018	NA	0.356432	0.45827	NA
