# Supplementary material
Source: Research Square preprint supplement (doi:10.21203/rs.3.rs-9858448/v1)
Supplement: Supplementary file 2 [file 23804500c96250d295a227f4.xlsx]

## Sheet: ref-unt_exp-bar
Tag	GeneSymbol	type	sequence	unt_r1	unt_r2	unt_r3	bar_r1	bar_r2	bar_r3	baseMean	log10BaseMean	log2FoldChange	stat	pvalue	padj	log10BaseMeanA	log2FoldChangeFitted	log2FoldChangeMinFitted	foldChange
A1BG-1	A1BG	x	CATCTTCTTTCACCTGAACG	412	358	359	436	459	482	418	262117628177504	0.286	194171886010531	0.0522	0.611	257557268720531	0.00613	0.28	12192550940763
A1BG-2	A1BG	x	CTCCGGGGAGAACTCCGGCG	169	183	213	197	202	226	198	229666519026153	0.146	0.692568123873319	0.489	0.92	227492719309978	-0.0055	0.152	110649735309227
A1BG-3	A1BG	x	TCTCCATGGTGCATCAGCAC	1	1	2	1	1	2	1	0	1.02e-06	4.60843e+07	1	NA	0.1249387366083	-0.0203	0.0203	100000070701037
A1BG-4	A1BG	x	TGGAAGTCCACTCCACTCAG	365	506	436	453	290	283	389	258994960132571	-0.349	-1739875400083	0.0819	0.673	263915433286088	0.0049	-0.354	0.785128118673572
A1CF-1	A1CF	x	ACAGGAAGAATTCAGTTATG	318	233	376	314	350	250	307	248713837547719	-0.0204	-0.0977176638076074	0.922	0.992	248995847942483	0.000848	-0.0212	0.985959300629536
A1CF-2	A1CF	x	AGTTATGTTAGGTATACCCG	232	186	130	233	190	165	189	227646180417324	0.102	0.400414823066392	0.689	0.961	226165930376471	-0.00615	0.108	107326028639345
A1CF-3	A1CF	x	CTTCATTTCCCAGCCACCAA	414	438	455	397	442	338	414	26170003411209	-0.151	-0.970721013268183	0.332	0.871	263915433286088	0.00597	-0.157	0.900625979847929
A1CF-4	A1CF	x	GAATTCAACAATATCAAACC	188	280	324	179	202	247	237	23747483460101	-0.335	-143494967518934	0.151	0.762	242160392686983	-0.00326	-0.332	0.792784136610284
A2M-1	A2M	x	ACTGCATCTGTGCAAACGGG	261	248	283	260	257	250	260	241497334797082	-0.0463	-0.258853792308262	0.796	0.976	242160392686983	-0.00184	-0.0445	0.968416791677004
A2M-2	A2M	x	ATGTCTCATGAACTACCCTG	562	647	519	606	650	723	618	279098847508882	0.196	144961740695852	0.147	0.759	276042248342321	0.0129	0.183	114551789797976
A2M-3	A2M	x	TGAAATGAAACTTCACACTG	254	293	200	201	191	170	218	23384564936046	-0.411	-191243052954223	0.0558	0.623	239619934709574	-0.00434	-0.407	0.752101875694344
A2M-4	A2M	x	TTACTCATATAGGATCCCAA	456	356	369	400	432	316	388	258883172559421	-0.0409	-0.234838402760228	0.814	0.979	259512864289385	0.00485	-0.0458	0.9720483629045
A2ML1-1	A2ML1	x	AAATACTTACTGGTATCGAG	224	208	281	148	266	155	214	233041377334919	-0.325	-128714188842254	0.198	0.801	23759682751322	-0.00456	-0.32	0.79829838635665
A2ML1-2	A2ML1	x	ACCCTGGTTACTGATAACAA	120	163	142	124	130	156	139	214301480025409	-0.0518	-0.203987468446904	0.838	0.981	215126767533065	-0.0108	-0.041	0.964731915555852
A2ML1-3	A2ML1	x	GGTGGATTATTACATCGACC	174	124	171	197	211	245	187	22718416065365	0.477	208812029787016	0.0368	0.56	219405158799542	-0.00629	0.483	13918463918311
A2ML1-4	A2ML1	x	TGGTCACTACCCCTATCAAG	297	286	247	300	311	282	287	245788189673399	0.106	0.603083631353455	0.546	0.935	244195683765641	-0.000236	0.106	10762401247838
A3GALT2-1	A3GALT2	x	AAATAATGGGAGCCCCCCAG	216	241	239	198	270	239	234	236921585741014	0.0226	0.112976030543302	0.91	0.99	23654879848909	-0.00345	0.026	101578846758206
A3GALT2-2	A3GALT2	x	ACACGTAGTACATCACGCTC	353	265	333	434	359	309	342	253402610605613	0.213	114562093682659	0.252	0.832	250105926221775	0.00266	0.21	115909595190446
A3GALT2-3	A3GALT2	x	AGAACATGAAGTGCGCCTCG	522	602	583	473	545	513	540	273239375982297	-0.157	-117200640008766	0.241	0.828	275511226639507	0.0105	-0.168	0.896888159662015
A3GALT2-4	A3GALT2	x	GCGCTGGCAAGACGTGTCGA	473	421	511	502	403	482	465	266745295288995	-0.0186	-0.123327242359447	0.902	0.989	267055506952144	0.00796	-0.0266	0.987190215191202
A4GALT-1	A4GALT	x	AACGTGCCAGTAGATCATGA	228	173	139	212	210	199	194	228780172993023	0.202	0.868528800226869	0.385	0.891	225527250510331	-0.00577	0.208	115029189335061
A4GALT-2	A4GALT	x	AGGCCAGGAACGCGCCGTTG	188	157	111	230	162	120	161	220682587603185	0.167	0.579467023741109	0.562	0.939	218184358794477	-0.00789	0.175	112272142207361
A4GALT-3	A4GALT	x	CCACATGAGTGCGATCCTGG	164	205	243	209	261	255	223	234830486304816	0.244	113053014645827	0.258	0.835	23096301674259	-0.00407	0.248	118427161185363
A4GALT-4	A4GALT	x	GCCGCGTACCAGTCGGCCAG	53	58	49	79	41	39	53	172427586960079	-0.00904	-0.021278714916927	0.983	0.998	172699872793626	-0.0352	0.0262	0.993753540242006
A4GNT-1	A4GNT	x	ACGGAACAGGAGACCAAATG	84	147	120	116	92	98	110	204139268515822	-0.198	-0.657443684597195	0.511	0.926	206818586174616	-0.0171	-0.181	0.871758239537062
A4GNT-2	A4GNT	x	CAGCCAAAAAGTTCTCCTCA	120	130	95	171	194	130	140	214612803567824	0.521	19626212360899	0.0497	0.604	206069784035361	-0.0106	0.532	14349495346067
A4GNT-3	A4GNT	x	CAGCTCGGATGCATCCCGCC	203	168	197	134	200	142	174	22405492482826	-0.255	-106177395078452	0.288	0.853	227722708099136	-0.00707	-0.248	0.837987134667949
A4GNT-4	A4GNT	x	TGCATTCCCACAAAAAGGGG	86	81	37	69	55	120	75	18750612633917	0.258	0.619428533941963	0.536	0.931	183250891270624	-0.028	0.286	119581979677612
AAAS-1	AAAS	x	CCCAGGGTGAGACAGCACTT	202	174	190	248	323	268	234	236921585741014	0.568	284766827501615	0.0044	0.283	227569517646861	-0.00345	0.571	148246700980283
AAAS-2	AAAS	x	GCCAAGACAGAGGCACTAAG	287	314	196	253	253	248	258	241161970596323	-0.08	-0.384291029646628	0.701	0.963	242433706667645	-0.00196	-0.078	0.946057646725596
AAAS-3	AAAS	x	GGCCCATCGACAGAGTGCCA	135	94	74	55	79	132	95	197772360528885	-0.188	-0.505940224719644	0.613	0.948	200432137378264	-0.0217	-0.166	0.877821797609519
AAAS-4	AAAS	x	TGACAGCGCCCTGATAGAGT	65	87	19	94	62	72	66	181954393554187	0.415	0.887318075853841	0.375	0.888	175587485567249	-0.0305	0.446	13332986770912
AACS-1	AACS	x	AGAGCTACGAGTATGTCTAC	258	276	277	220	168	272	245	238916608436453	-0.297	-140734334464057	0.159	0.77	243189959949149	-0.00277	-0.294	0.813943185070435
AACS-2	AACS	x	CACATTCACACCGAAGTCCG	407	360	390	317	266	276	336	252633927738984	-0.43	-261441193859468	0.00894	0.368	258621210423209	0.00235	-0.432	0.742261785314525
AACS-3	AACS	x	CATCCTCCTGTGCTACACCA	332	334	315	373	332	322	335	252504480703685	0.0661	0.410930468704577	0.681	0.96	251454775266029	0.0023	0.0638	10468828438489
AACS-4	AACS	x	CTTCTCACGTGTGTATGATG	367	208	281	364	330	341	315	24983105537896	0.274	133955562428201	0.18	0.788	245535250995749	0.00127	0.273	120915567583336
AADAC-1	AADAC	x	AAGTCTGAAGCACTAAGAAG	322	390	346	372	313	320	344	253655844257153	-0.0741	-0.445548712223716	0.656	0.957	25473644129795	0.00276	-0.0769	0.949934536148294
AADAC-2	AADAC	x	ATGTATATAATGCCTTAAGG	234	219	274	359	362	241	282	245024910831936	0.404	196896745085938	0.049	0.603	238441315613938	-0.000522	0.405	132317143990812
AADAC-3	AADAC	x	ATTTCTATCCAAATCACTCA	650	434	387	503	530	388	482	268304703823885	-0.0499	-0.25975997210613	0.795	0.976	269049141800787	0.00857	-0.0585	0.966003284849634
AADAC-4	AADAC	x	GGTATTTCTGGAGATAGTGC	156	216	203	216	227	264	214	233041377334919	0.298	13955364386797	0.163	0.773	228254658996997	-0.00456	0.303	122943886725458
AADACL2-1	AADACL2	x	AAAGAAAGTCAGAAACCCGA	196	235	237	281	234	246	238	237657695705651	0.188	0.9651618185391	0.334	0.873	234765520775588	-0.0032	0.191	113918337722211
AADACL2-2	AADACL2	x	GAAAAAATTTGACTGCAGCA	2	1	2	1	1	2	2	0.301029995663981	-0.322	-0.152726144126138	0.879	NA	0.221848749616356	-0.0515	-0.27	0.799960128332753
AADACL2-3	AADACL2	x	GTGATGTATTCATCTGAAAG	138	119	128	125	147	205	144	215836249209525	0.309	116909354111322	0.242	0.829	210833947478884	-0.00999	0.319	123884869778391
AADACL2-4	AADACL2	x	TGGGGGCAATTTAGCAACAG	54	38	90	87	109	86	77	188649072517248	0.632	167958852085855	0.093	0.692	178295013326541	-0.0274	0.659	154971186191834
AADACL3-1	AADACL3	x	ACTTATGCTTAGGTAACTTG	352	352	285	339	359	328	336	252633927738984	0.053	0.317880871715253	0.751	0.971	251807503687752	0.00235	0.0506	103741993656561
AADACL3-2	AADACL3	x	CTGCGGTGACAGTTTCGGAG	84	54	106	43	49	57	66	181954393554187	-0.712	-185090629048043	0.0642	0.641	191026857161907	-0.0305	-0.682	0.610473256334567
AADACL3-3	AADACL3	x	GGCATCGTGTACTACCACGG	312	270	320	304	195	312	286	245636603312904	-0.153	-0.740115434596684	0.459	0.913	247808528282228	-0.000293	-0.153	0.899378312147752
AADACL3-4	AADACL3	x	TCGGGGTCATACTTTAGCGG	177	154	132	190	121	163	156	219312459835446	0.0339	0.132362890641417	0.895	0.988	218845973629829	-0.00835	0.0422	10237759352287
AADACL4-1	AADACL4	x	CAAGGTAGCAGGGATATCCG	138	107	61	111	74	81	95	197772360528885	-0.202	-0.57475242102507	0.565	0.939	200860017176192	-0.0217	-0.18	0.869344560090022
AADACL4-2	AADACL4	x	GTAAACTCACCAAAGTGACC	242	286	281	216	321	293	273	243616264704076	0.037	0.1853687066763	0.853	0.983	243082726689261	-0.00105	0.038	102597814533714
AADACL4-3	AADACL4	x	TAGAAGATGATGCCTCGCCG	159	76	90	120	93	146	114	205690485133647	0.144	0.433977459667597	0.664	0.957	203476210625921	-0.0161	0.16	110496448479991
AADACL4-4	AADACL4	x	TATCGTCCCAAAACGCAGGT	173	189	174	190	174	177	180	225527250510331	0.0134	0.063106179342263	0.95	0.994	225204353497311	-0.00673	0.0201	100933144115043
AADAT-1	AADAT	x	AGATCCATTTGTCCTTGACT	183	245	245	199	153	150	196	229225607135648	-0.423	-185835311539158	0.0631	0.64	235089380950431	-0.00563	-0.417	0.745872013345733
AADAT-2	AADAT	x	ATTGATACTTACCCAGCACT	377	421	367	494	335	347	390	25910646070265	0.0136	0.0757956413655357	0.94	0.993	258920467064238	0.00494	0.00866	100947137389815
AADAT-3	AADAT	x	GTAGCTGACATATTGAGCAG	118	151	134	85	63	169	120	207918124604762	-0.346	-100814393324151	0.313	0.863	212818379142145	-0.0147	-0.331	0.786762445353566
AADAT-4	AADAT	x	TAATAATGTTGCAGCCCAGT	195	165	166	222	87	218	176	224551266781415	0.00274	0.00901249243054533	0.993	0.998	224386448943408	-0.00696	0.0097	100190102794157
AAED1-1	AAED1	x	CATCTGCAAGGAATACGTAG	191	86	129	130	128	142	134	212710479836481	-0.0215	-0.0715309700969711	0.943	0.994	213140477885753	-0.0117	-0.0098	0.985207830749201
AAED1-2	AAED1	x	GACATGTTATGTCTTACCTG	213	336	235	190	195	165	222	234635297445064	-0.511	-22771228916867	0.0228	0.49	241719480796478	-0.00413	-0.507	0.701735863019538
AAED1-3	AAED1	x	GTCATCCTACCATCATATTG	226	182	240	236	166	320	228	235793484700045	0.156	0.637381778448908	0.524	0.929	233445375115093	-0.00379	0.16	111419365081933
AAED1-4	AAED1	x	TCCCGGAACAGCGCGCCGAA	164	194	154	118	128	146	151	217897694729317	-0.385	-159942928150366	0.11	0.718	223214870625617	-0.00895	-0.376	0.765778998547191
AAGAB-1	AAGAB	x	AGCAGACATCAATCTATGTG	410	517	504	501	423	481	473	267486114073781	-0.0265	-0.175876887036805	0.86	0.984	267851837904011	0.00825	-0.0348	0.981799270594882
AAGAB-2	AAGAB	x	CAAGAATGGTGCATCAAACA	92	77	102	125	87	126	102	200860017176192	0.319	106134705241537	0.289	0.853	195584803615474	-0.0195	0.338	124746557191405
AAGAB-3	AAGAB	x	CACTACATTGGACCACACAT	186	144	200	149	237	161	180	225527250510331	0.0455	0.181232888805319	0.856	0.983	224715461488113	-0.00673	0.0522	103204079541141
AAGAB-4	AAGAB	x	GCCATGAGGAGACACTATCA	135	160	129	157	184	83	141	214921911265538	3.21e-07	1.06991e+08	1	1	215024460187307	-0.0105	0.0105	100000022250027
AAK1-1	AAK1	x	CAAAACTCCTATTATCCACC	176	161	214	238	205	194	198	229666519026153	0.209	0.964000694521331	0.335	0.873	226403034413212	-0.0055	0.214	11558867065548
AAK1-2	AAK1	x	CAAAAGGCCGGATATTTACC	140	123	83	135	136	195	135	213033376849501	0.43	150313235073734	0.133	0.745	206195484407311	-0.0115	0.442	134723357686569
AAK1-3	AAK1	x	GGGTGCAATTGAAGTCTCTG	101	79	81	130	85	70	91	195904139232109	0.127	0.381032636285253	0.703	0.963	193951925261862	-0.023	0.15	109202054574565
AAK1-4	AAK1	x	TGGCAAAATCATCACTACGA	128	93	67	86	102	90	94	19731278535997	-0.051	-0.156888159934363	0.875	0.986	198227123303957	-0.022	-0.029	0.965267024871757
AAMDC-1	AAMDC	x	AAATTGCTTCCTTATCATGG	141	167	128	158	88	84	128	210720996964787	-0.402	-133144591002923	0.183	0.79	216236523454892	-0.0129	-0.389	0.75680839648479
AAMDC-2	AAMDC	x	AAGTATGGCCAGGGGGTAGT	379	333	341	276	373	234	323	25092025223311	-0.254	-130998810332856	0.19	0.796	254530711646582	0.00169	-0.256	0.838568184440931
AAMDC-3	AAMDC	x	AGGTACTCCACAGTTGATGA	189	229	170	285	245	259	230	236172783601759	0.424	20956251602255	0.0361	0.555	229225607135648	-0.00368	0.428	134164222488226
AAMDC-4	AAMDC	x	GATTGGCCGAGGGATGAGTG	172	131	178	88	155	172	149	217318626841227	-0.213	-0.745988406614332	0.456	0.912	220502382165417	-0.00923	-0.204	0.862741344542656
AAMP-1	AAMP	x	AAGATGACAAAGCCTTCGTA	135	111	122	131	79	103	114	205690485133647	-0.234	-0.806311179057438	0.42	0.902	208872656395386	-0.0161	-0.218	0.850274160064196
AAMP-2	AAMP	x	AGGTGACCTCGCTATCGTCG	307	246	180	232	317	314	266	242488163663107	0.236	105337733677968	0.292	0.855	238798271992147	-0.00147	0.237	117772278959498
AAMP-3	AAMP	x	TGAGTGGCCTCTTGAAAGTG	31	82	28	43	68	68	53	172427586960079	0.344	0.717032464507107	0.473	0.917	167209785793572	-0.0352	0.379	12692708860198
AAMP-4	AAMP	x	TGGATGTGGAAAGTCCCGAA	96	111	108	150	96	51	102	200860017176192	-0.0849	-0.235167164075978	0.814	0.979	202118929906994	-0.0195	-0.0654	0.942849887027405
AANAT-1	AANAT	x	ACCTTCACGCTCGATCTCAA	343	287	321	307	280	270	301	247856649559384	-0.15	-0.873082193629526	0.383	0.89	250105926221775	0.000532	-0.151	0.90125046261083
AANAT-2	AANAT	x	GCCCTCCTCGAACCAGCCCA	647	742	520	597	730	550	631	280002935924413	-0.0244	-0.15697392822322	0.875	0.986	2803684673674	0.0132	-0.0376	0.983229427149003
AANAT-3	AANAT	x	GGTGAGGCAGCGAAACTCAC	208	217	360	386	285	406	310	249136169383427	0.456	201513119074105	0.0439	0.586	241774840202559	0.00101	0.455	13717332885906
AANAT-4	AANAT	x	GTGGCGCCGCTGACAGCTCG	539	501	471	582	641	480	536	272916478969277	0.173	118377585306313	0.237	0.825	270214320961936	0.0104	0.163	112740041214542
AAR2-1	AAR2	x	CATGTTCAGGATGACCACAG	467	363	432	565	311	441	430	263346845557959	0.0615	0.311651180236013	0.755	0.971	262393810018845	0.00662	0.0549	104355019780368
AAR2-2	AAR2	x	CTTGGTTATCTCAGCTGGCG	240	214	304	185	259	203	234	236921585741014	-0.228	-105001838080981	0.294	0.856	240254795091239	-0.00345	-0.225	0.853817714391245
AAR2-3	AAR2	x	GGGGTAGATTCTGCCCCACG	201	158	149	174	215	131	171	223299611039215	0.0337	0.133257722935553	0.894	0.988	222874245756426	-0.00723	0.0409	102363401958517
AAR2-4	AAR2	x	TAAGGAAGAAACCCATACGA	269	282	267	275	234	227	259	241329976408125	-0.152	-0.832334259364944	0.405	0.897	243563204895166	-0.0019	-0.15	0.900001929793512
AARD-1	AARD	x	GCAGAGCTGGACGGGCGTTG	96	115	105	144	137	159	126	210037054511756	0.478	186685853224242	0.0619	0.638	202256582789874	-0.0133	0.491	139281148066904
AARD-3	AARD	x	GTCCCCGAAGAAGTCGCACG	270	225	265	237	290	339	271	243296929087441	0.188	0.959606744387105	0.337	0.874	240369233756113	-0.00117	0.189	113918337722211
AARD-4	AARD	x	TGCTGGAGGACCTCAGACGA	104	111	92	98	182	176	127	210380372095596	0.571	193253795833466	0.0533	0.614	201001712075752	-0.0131	0.584	148555292066083
AARS-1	AARS	x	CCAAGAAAAGCATTGACACA	80	121	62	123	69	145	100	2	0.358	0.999027824205398	0.318	0.865	19428344937701	-0.0201	0.378	128164792416019
AARS-2	AARS	x	GGAGGCCAGATCTATGACGA	105	65	62	79	59	76	74	186923171973098	-0.117	-0.325502673332952	0.745	0.97	188836673017124	-0.0282	-0.0888	0.922103117912631
AARS2-1	AARS2	x	AGCAAACTGGGGTCGCCGCG	117	51	54	152	56	71	84	192427928606188	0.33	0.75769269296715	0.449	0.91	186923171973098	-0.0253	0.355	125701337452183
AARS2-2	AARS2	x	CCAACTTCTACGCAGAACAG	34	43	27	48	21	42	36	155630250076729	0.094	0.183989389476316	0.854	0.983	153991208457912	-0.0435	0.138	106732533803996
AARS2-3	AARS2	x	GCTGAGCCAGTTCAGAAGCA	154	104	95	71	111	104	106	202530586526477	-0.304	-0.965787947751686	0.334	0.872	207065345066816	-0.0183	-0.286	0.810003473632046
AARS2-4	AARS2	x	TCGTAGTGGATCTCAGTACA	14	24	18	24	40	59	30	147712125471966	1.14	20030488230462	0.0452	0.59	127106677228654	-0.0474	1.19	220381023175322
AARS-3	AARS	x	TCAGAATGTGCGTAGCTGTG	136	127	90	107	124	94	113	205307844348342	-0.119	-0.413855891950051	0.679	0.959	207065345066816	-0.0163	-0.103	0.92082569720504
AARS-4	AARS	x	TTGGTGCTGAGGATGCCGAT	299	333	293	374	266	234	300	247712125471966	-0.0818	-0.407828725604457	0.683	0.96	248902047801937	0.000479	-0.0823	0.944878019825319
AARSD1-1	AARSD1	x	ACCTCCGCTCCCAATCTACC	431	352	283	486	455	435	407	260959440922522	0.368	213562807381046	0.0327	0.541	255063594997089	0.00568	0.362	129056249045178
AARSD1-2	AARSD1	x	CATTCGGGTTGTTAACATCG	140	160	161	197	232	113	167	222271647114758	0.234	0.853514381623936	0.393	0.894	218657967066999	-0.00747	0.241	117609125029096
AARSD1-3	AARSD1	x	CCCAGACAGAAATATCAGGT	83	132	139	177	164	173	145	216136800223497	0.538	203847652234078	0.0415	0.58	207188200730613	-0.00983	0.548	145195827990389
AARSD1-4	AARSD1	x	GTGCTGAGAGTGACTCGCCG	213	205	217	150	288	218	215	233243845991561	0.0469	0.194821789628337	0.846	0.982	232565247057231	-0.00451	0.0514	103304278013339
AASDH-1	AASDH	x	AAATGAGTTGATAATGACGG	631	500	796	758	646	688	670	282607480270083	0.119	0.756236425932988	0.45	0.91	280776045993579	0.0143	0.105	108598185632229
AASDH-2	AASDH	x	GACAGTCAGATCAAACGTCA	78	94	126	88	89	54	88	194448267215017	-0.367	-107917075250734	0.281	0.848	199709500935659	-0.024	-0.343	0.775393206347005
AASDH-3	AASDH	x	TGTGAATTGCCTGTACAACT	527	349	430	428	424	437	432	263548374681491	-0.0189	-0.113109629782235	0.91	0.99	263882192221939	0.0067	-0.0256	0.986984956098855
AASDH-4	AASDH	x	TTGTTGGTACATCAGTACCT	250	185	354	214	350	203	259	241329976408125	-0.0408	-0.156598504762234	0.876	0.986	241995574848976	-0.0019	-0.0389	0.972115742497883
AASDHPPT-1	AASDHPPT	x	AGGAAAACCAGTTCTTGCAA	203	190	97	178	175	141	164	22148438480477	0.0117	0.0413366615635624	0.967	0.996	221307482530885	-0.00767	0.0194	100814279569572
AASDHPPT-2	AASDHPPT	x	CCCGAGGAGAAGGAGCGCAT	15	7	33	42	44	9	25	139794000867204	0.788	108244141228243	0.279	0.848	126324143477458	-0.0512	0.839	172667911714882
AASDHPPT-3	AASDHPPT	x	CTGCCAGCAGCCATTCGGCT	284	333	307	333	274	299	305	248429983934679	-0.0284	-0.163916109914344	0.87	0.985	248855071650044	0.000743	-0.0291	0.980507112001979
AASDHPPT-4	AASDHPPT	x	GCTGAACCTGAGCTGCAAGT	135	75	117	103	106	27	94	19731278535997	-0.471	-109985476199122	0.271	0.844	203742649794062	-0.022	-0.449	0.721464343430814
AASS-1	AASS	x	AAGACCTCAGAAAAGTGTAT	290	285	315	306	290	395	314	249692964807321	0.155	0.859775819071794	0.39	0.892	247226875192525	0.00122	0.154	111342161822869
AASS-2	AASS	x	CATCACAAACAAAGTTAACA	335	359	347	400	373	458	379	257863920996807	0.242	154841730224392	0.122	0.733	254032947479087	0.00445	0.238	118263100024414
AASS-3	AASS	x	CGTGCTCAGTCACTTTCAAT	308	310	266	193	289	283	275	243933269383026	-0.209	-103347293676145	0.301	0.858	246933101029341	-0.000931	-0.208	0.865136690584988
AASS-4	AASS	x	GGGTAGTGGCATTTGGACAG	294	233	307	252	298	307	282	245024910831936	0.0392	0.208450599567908	0.835	0.981	244404479591808	-0.000522	0.0397	102754387733398
AATF-1	AATF	x	AAACCACCTCTAGAAAAGCA	136	143	154	122	154	116	138	213987908640124	-0.144	-0.572192269727015	0.567	0.939	21593666416337	-0.011	-0.133	0.905006462882905
AATF-2	AATF	x	AGAAACTTTGACACTAGAGA	82	109	106	137	139	110	114	205690485133647	0.378	135982367576327	0.174	0.783	199563519459755	-0.0161	0.394	129953906245544
AATF-3	AATF	x	AGGCACTTAAAGCATTGTTG	84	51	60	64	55	74	65	181291335664286	-0.0149	-0.0400293612403584	0.968	0.996	181291335664286	-0.0309	0.016	0.989725256564791
AATF-4	AATF	x	GAATATGATGAGGACGACCT	63	129	108	132	111	147	115	206069784035361	0.379	121337389028994	0.225	0.818	2	-0.0158	0.395	130044014654848
AATK-1	AATK	x	AGCACCGGAACCACGCCCGG	432	370	335	336	489	328	382	258206336291171	0.0202	0.107271392434065	0.915	0.991	257863920996807	0.00458	0.0156	10141000541646
AATK-2	AATK	x	CTCCTCAAGTCCACAGACGT	327	411	409	362	402	442	392	259328606702046	0.0724	0.443818953056798	0.657	0.957	258244216318161	0.00503	0.0674	105146439650986
AATK-3	AATK	x	GCATAGCAACCTGCTCGTCG	130	159	118	133	123	189	142	215228834438306	0.129	0.4810433367315	0.63	0.952	213247315450556	-0.0103	0.139	109353545748463
AATK-4	AATK	x	GTGTCAGCCAACAACAACAG	368	281	269	265	277	279	290	246239799789896	-0.161	-0.867860106516287	0.385	0.891	248572142648158	-6.75e-05	-0.161	0.894404901782606
ABAT-1	ABAT	x	CCTTAAAGACCATCTTCATG	105	91	133	173	96	76	112	204921802267018	0.0685	0.203079035984111	0.839	0.981	204007464323031	-0.0166	0.0851	104862583856901
ABAT-2	ABAT	x	GAAAGAAGTCATCGGATGCG	162	213	172	117	176	153	166	222010808804005	-0.294	-11942156994779	0.232	0.823	226086607161377	-0.00753	-0.286	0.81563749333901
ABAT-3	ABAT	x	GTGAATGGCTTTAGAGTGCG	231	285	304	255	259	330	277	244247976906445	0.0416	0.214100184293286	0.83	0.98	243669259766405	-0.000813	0.0424	102925467387955
ABAT-4	ABAT	x	TGCAATTACGAAGAGAGCCG	141	152	153	127	128	159	143	215533603746506	-0.107	-0.442908286309129	0.658	0.957	217221360399248	-0.0101	-0.0969	0.928516852306729
ABCA10-1	ABCA10	x	ACTCTCTGAAATAACTGACA	383	342	430	458	385	398	399	260097289568675	0.104	0.651751604112495	0.515	0.927	25854607295085	0.00534	0.0987	10747491728555
ABCA10-2	ABCA10	x	GACACTTCAGTGAATGCACG	379	419	450	395	447	520	435	263848925695464	0.126	0.802617863588747	0.422	0.902	261909333062674	0.00682	0.119	109126387705493
ABCA10-3	ABCA10	x	GGGTACTGAAGAGGATAAGT	121	153	122	93	90	74	109	203742649794062	-0.624	-221274588112487	0.0269	0.516	212057393120585	-0.0174	-0.607	0.648869383469592
ABCA10-4	ABCA10	x	TCCTTATTAAAACACTCATG	111	106	92	86	131	127	109	203742649794062	0.155	0.531834582680747	0.595	0.945	201283722470517	-0.0174	0.172	111342161822869
ABCA1-1	ABCA1	x	AATGCAGAGAAAGCTATCTG	256	249	273	323	203	286	265	242324587393681	0.0617	0.300139559377168	0.764	0.973	241385834227003	-0.00153	0.0632	104369487460716
ABCA1-2	ABCA1	x	GGACACGCCCAGCTTCAAGT	140	128	97	225	157	189	156	219312459835446	0.646	253347793493191	0.0113	0.401	208517160973681	-0.00835	0.654	156482356347302
ABCA12-1	ABCA12	x	ACGGTCATATAATACACAAG	117	130	131	119	200	140	140	214612803567824	0.28	1039128618054	0.299	0.858	210037054511756	-0.0106	0.291	121419488439505
ABCA12-2	ABCA12	x	ATGGTGCTAAATGATCCTTG	281	290	324	345	319	286	308	248855071650044	0.086	0.501080667217255	0.616	0.949	247470178059625	0.000901	0.0851	106142320894979
ABCA12-3	ABCA12	x	GAGGTGATACCCATCGCCAA	118	66	95	82	99	93	92	196378782734556	-0.0261	-0.081061680655263	0.935	0.993	196848294855394	-0.0227	-0.0034	0.982071520893559
ABCA12-4	ABCA12	x	GGCAGCTATAAATACAACCC	127	110	79	99	112	168	116	206445798922692	0.262	0.848910757007253	0.396	0.894	202256582789874	-0.0156	0.278	119913991379111
ABCA1-3	ABCA1	x	GTGGCATGGCAGGACTACGT	112	130	93	129	88	97	108	203342375548695	-0.0934	-0.317465897179622	0.751	0.971	204792355231718	-0.0177	-0.0757	0.937311182585655
ABCA13-1	ABCA13	x	ACAATTTAGCTGATTCGGCG	465	439	393	393	404	278	395	259659709562646	-0.271	-154777524069805	0.122	0.733	263581872136442	0.00516	-0.276	0.828744904487992
ABCA13-2	ABCA13	x	CAATGACTTCCATAATTGGG	408	377	469	353	284	275	361	255750720190566	-0.459	-268329697363481	0.00729	0.338	262117628177504	0.0036	-0.463	0.727490341817379
ABCA13-3	ABCA13	x	GGCTTCATTTAATAACACTG	187	137	204	155	133	161	163	221218760440396	-0.234	-0.958124461232655	0.338	0.874	224551266781415	-0.00774	-0.226	0.850274160064196
ABCA13-4	ABCA13	x	TATCAGGAAGACTTGCGAAG	240	175	284	227	216	203	224	235024801833416	-0.114	-0.516939071933146	0.605	0.947	236735592102602	-0.00402	-0.11	0.924022572446823
ABCA1-4	ABCA1	x	TTGGACAGCCCAAGACATCG	183	238	221	209	206	190	208	231806333496276	-0.0856	-0.414375407921702	0.679	0.959	233041377334919	-0.0049	-0.0807	0.94239252437463
ABCA2-1	ABCA2	x	CATGTACGTGGCGATCCGAG	281	198	269	247	178	213	231	236361197989214	-0.229	-10545035913844	0.292	0.855	23967803431448	-0.00362	-0.225	0.853226098112067
ABCA2-2	ABCA2	x	CTTGTGTGGCAACAACCGGT	41	79	59	53	75	99	68	183250891270624	0.343	0.869420423312325	0.385	0.891	177573177626023	-0.0299	0.373	126839139932587
ABCA2-3	ABCA2	x	GATGTCGTGCCCGTAGATGG	135	91	110	73	139	90	106	202530586526477	-0.154	-0.477890617565159	0.633	0.952	204921802267018	-0.0183	-0.136	0.89875512661103
ABCA2-4	ABCA2	x	TAGGGGATGAAATTGCCACG	71	91	124	140	80	93	100	2	0.13	0.389573971363953	0.697	0.962	197924477840938	-0.0201	0.15	109429370126074
ABCA3-1	ABCA3	x	AATGCGCATTTACTGACCGA	308	305	414	283	274	312	316	24996870826184	-0.241	-131897230763291	0.187	0.793	253444918887762	0.00132	-0.242	0.84615859660029
ABCA3-2	ABCA3	x	ACCTACGGTTCAGTTACACA	339	389	324	256	357	268	322	250785587169583	-0.256	-138617321588978	0.166	0.776	254489448509806	0.00163	-0.258	0.837406487508427
ABCA3-3	ABCA3	x	AGTGGACGGGCATACATCAG	464	496	656	573	508	344	507	270500795933334	-0.181	-0.961304291358277	0.336	0.873	273132010171891	0.00944	-0.19	0.882091365197177
ABCA3-4	ABCA3	x	CCTCCTGAGTCCCGTCAACG	133	145	61	118	178	208	140	214612803567824	0.572	174027724646691	0.0818	0.673	205307844348342	-0.0106	0.583	148658298443101
ABCA4-1	ABCA4	x	AAAGACCGAGCCCCTAACAG	121	124	99	119	96	76	106	202530586526477	-0.241	-0.817445765828125	0.414	0.9	205943718785187	-0.0183	-0.223	0.84615859660029
ABCA4-2	ABCA4	x	AGCACCATACCCGCAAACAG	75	87	111	55	80	104	85	192941892571429	-0.192	-0.55530119443991	0.579	0.942	195904139232109	-0.025	-0.167	0.875391329694264
ABCA4-3	ABCA4	x	AGGGTGTTGAGTTGCCACAG	95	62	95	56	73	78	76	188081359228079	-0.284	-0.820239486031115	0.412	0.9	192427928606188	-0.0277	-0.256	0.821310700752066
ABCA4-4	ABCA4	x	GATCCGAATGGACATAGACG	75	92	67	34	80	66	69	183884909073726	-0.379	-0.967048040586807	0.334	0.872	189209460269048	-0.0296	-0.349	0.768970415635134
ABCA5-1	ABCA5	x	AAAATGAATGATACCTCAGG	157	215	205	155	119	142	166	222010808804005	-0.472	-196681207056401	0.0492	0.603	228405455843607	-0.00753	-0.464	0.720964435730112
ABCA5-2	ABCA5	x	AAATTATGAGGAGTTATCAG	164	198	204	104	172	189	172	223552844690755	-0.284	-10904425135153	0.276	0.846	227569517646861	-0.00718	-0.277	0.821310700752066
ABCA5-3	ABCA5	x	GAAATAGATACCTTTCCCCG	46	41	20	22	42	46	36	155630250076729	0.0399	0.075710685629973	0.94	0.993	155226252296555	-0.0435	0.0834	102804256570579
ABCA5-4	ABCA5	x	TGACAGTGACTATGTATCCG	113	145	136	134	122	132	130	211394335230684	-0.0221	-0.0874028142661016	0.93	0.992	211837496710591	-0.0125	-0.0096	0.984798179521594
ABCA6-1	ABCA6	x	AACCAATCACCCTGTGATGG	329	370	383	298	367	485	372	25705429398819	0.0879	0.467057317528595	0.64	0.954	255710600605089	0.00412	0.0838	106282200259786
ABCA6-2	ABCA6	x	CAGACAGCTGTGAGTGACAT	375	481	475	415	402	496	441	264443858946784	-0.0196	-0.122848944179734	0.902	0.989	264705680075501	0.00705	-0.0266	0.986506184171339
ABCA6-3	ABCA6	x	GGCACCAAATAAAACACACA	359	407	384	404	395	378	388	258883172559421	0.0335	0.224267402103365	0.823	0.98	258357658563395	0.00485	0.0286	102349212361395
ABCA6-4	ABCA6	x	TTGTATATGAGTCTCCTGAA	135	121	212	216	160	217	177	224797326636181	0.342	130093146670895	0.193	0.798	219312459835446	-0.0069	0.349	126751252203442
ABCA7-1	ABCA7	x	AGTACGGGATCCCTGAACCA	283	334	295	314	264	210	283	245178643552429	-0.211	-107748799797285	0.281	0.848	248287358360875	-0.000464	-0.211	0.863938187400277
ABCA7-2	ABCA7	x	CTGGCCTAGACGTAACCCTA	177	148	158	136	202	224	174	22405492482826	0.219	0.885785806024535	0.376	0.888	220682587603185	-0.00707	0.226	116392653440214
ABCA7-3	ABCA7	x	TCAAACAGCACGTTGTACTG	132	111	111	155	148	159	136	213353890837022	0.384	156459745419246	0.118	0.728	207188200730613	-0.0114	0.395	130495494768896
ABCA7-4	ABCA7	x	TGGACATTGACGTGGTCACG	75	127	113	118	145	80	110	204139268515822	0.123	0.38213587490121	0.702	0.963	202118929906994	-0.0171	0.14	108899701533611
ABCA8-1	ABCA8	x	AAATTATCAGCCAAAAGCGA	118	174	198	138	118	166	152	218184358794477	-0.216	-0.803018238837348	0.422	0.902	221307482530885	-0.00882	-0.207	0.860949188338904
ABCA8-2	ABCA8	x	CTGTTAATGTCACAAGAGAG	141	189	154	176	201	203	177	224797326636181	0.261	115790633455337	0.247	0.83	220772410692475	-0.0069	0.268	119830902133942
ABCA8-3	ABCA8	x	GACACCCCCAAAAGACAGTG	136	216	204	150	203	230	190	227875360095283	0.0684	0.272208874292525	0.785	0.975	226795353686239	-0.00607	0.0745	104855315588368
ABCA8-4	ABCA8	x	GCAAATCTGCGCAATTGCAA	209	139	219	226	184	238	202	230535136944662	0.193	0.820445581642083	0.412	0.9	227646180417324	-0.00525	0.198	114313833541404
ABCA9-1	ABCA9	x	ATATCAGAAAAGTTACCCGT	66	130	132	88	131	168	119	207554696139253	0.239	0.71105320744463	0.477	0.917	203875258899202	-0.0149	0.254	11801743433362
ABCA9-2	ABCA9	x	CTTGATAGATGTTCTAACCA	76	53	70	63	96	64	70	184509804001426	0.164	0.455817921481527	0.649	0.956	182173182169004	-0.0293	0.193	112038921419418
ABCA9-3	ABCA9	x	TGGCAGGAAGAACAATCATG	186	204	240	319	231	252	239	237839790094814	0.348	167514407950446	0.0939	0.694	232221929473392	-0.00314	0.351	127279493527594
ABCA9-4	ABCA9	x	TTATTTCTAACTAGACAGGA	270	277	276	235	317	346	287	245788189673399	0.126	0.658125431086513	0.51	0.926	243827858049261	-0.000236	0.126	109126387705493
ABCB10-1	ABCB10	x	ACAGCAATGATTGACACTGG	494	465	549	387	383	312	432	263548374681491	-0.479	-310536954126013	0.0019	0.198	270128008681409	0.0067	-0.486	0.717474767303352
ABCB10-2	ABCB10	x	CTCAGTGCCGTGTTTCTGTG	260	315	144	229	213	238	233	236735592102602	-0.0805	-0.317579234813889	0.751	0.971	237960763566322	-0.0035	-0.077	0.945729824940826
ABCB10-3	ABCB10	x	GAGTTCACCCACGGTCATGT	634	608	545	609	574	538	585	276715586608218	-0.0543	-0.420149987067524	0.674	0.959	277500329778598	0.0119	-0.0662	0.963061610165004
ABCB10-4	ABCB10	x	TATCGCCGTTCACTGGCCTG	522	621	530	561	562	431	538	273078227566639	-0.106	-0.712512394919641	0.476	0.917	274637468624273	0.0105	-0.116	0.929160674250913
ABCB1-1	ABCB1	x	ATTGACAGCTATTCGAAGAG	523	461	432	543	494	464	486	268663626926229	0.0841	0.585717847447766	0.558	0.938	267394199863409	0.00872	0.0754	106002625627196
ABCB11-1	ABCB11	x	GAGCTCCCCAGATTTAGCAA	170	197	109	223	190	172	177	224797326636181	0.297	115864890839341	0.247	0.83	220048569800083	-0.0069	0.304	122858698044565
ABCB11-2	ABCB11	x	GATTCTTTACTGGATTCGTG	431	364	300	418	403	345	377	257634135020579	0.0906	0.518034250322787	0.604	0.947	256229286445647	0.00435	0.0862	106481293362912
ABCB11-3	ABCB11	x	TCAACATGGTCATTAAACCA	331	487	472	463	600	566	486	268663626926229	0.337	196476310389499	0.0494	0.604	263346845557959	0.00872	0.328	12631272618458
ABCB11-4	ABCB11	x	TTTCAGAATCCTCCTAACTG	296	304	272	348	348	286	309	248995847942483	0.171	0.994820358397629	0.32	0.865	24633952302129	0.000953	0.17	112583858613676
ABCB1-2	ABCB1	x	CTGGAGAGATCCTCACCAAG	136	99	113	121	120	94	114	205690485133647	-0.0549	-0.196330139306378	0.844	0.982	206445798922692	-0.0161	-0.0388	0.962661167376638
ABCB1-3	ABCB1	x	TAGGTGATATCAATGATACA	149	173	221	173	166	185	178	225042000230889	-0.0514	-0.221824021905186	0.824	0.98	225767857486918	-0.00685	-0.0446	0.964999433122854
ABCB1-4	ABCB1	x	TTTATAGTAGGATTTACACG	113	92	153	115	188	129	132	212057393120585	0.271	0.919233243689162	0.358	0.883	207676177192421	-0.0121	0.283	120664391972076
ABCB4-1	ABCB4	x	ACACCACTGAACTCAATACG	332	288	383	267	262	250	297	247275644931721	-0.365	-203694340607877	0.0417	0.58	252417967830076	0.000318	-0.365	0.77646887500104
ABCB4-2	ABCB4	x	CATTTCGGACCGTAGACAGT	276	429	274	292	168	277	286	245636603312904	-0.41	-170980909893046	0.0873	0.682	251366143708348	-0.000293	-0.41	0.752623373705534
ABCB4-3	ABCB4	x	CCCTTCTCGAGCTAACGTCA	147	215	128	138	204	171	167	222271647114758	0.0662	0.250168898083517	0.802	0.977	221307482530885	-0.00747	0.0737	104695541075301
ABCB4-4	ABCB4	x	TGGCCGTGGAAATGTAACCA	133	100	195	130	94	158	135	213033376849501	-0.164	-0.535678629692614	0.592	0.944	215432251429351	-0.0115	-0.152	0.892546971472977
ABCB5-2	ABCB5	x	CAAAGGTCGGACTACAATCG	225	281	256	286	234	294	263	241995574848976	0.0952	0.498849034313929	0.618	0.949	240483371661994	-0.00165	0.0968	106821348361668
ABCB5-3	ABCB5	x	GAAACCTTCGCAATAGCCCG	392	311	385	304	324	250	328	251587384371168	-0.309	-172989348331659	0.0836	0.675	25595076406425	0.00194	-0.311	0.807201074504765
ABCB5-4	ABCB5	x	TTTGGATTGGCAGATCATGG	159	162	102	231	148	229	172	223552844690755	0.523	196302241276063	0.0496	0.604	214921911265538	-0.00718	0.53	143694017654406
ABCB6-1	ABCB6	x	CGAAGTGGAACGCTATCGAG	156	138	146	121	160	142	144	215836249209525	-0.0568	-0.232895127091951	0.816	0.979	216633142176652	-0.00999	-0.0468	0.961394196686461
ABCB6-2	ABCB6	x	GCACGTAGGGAGAGATGCGA	188	237	197	213	218	201	209	232014628611105	0.023	0.112630001064998	0.91	0.99	231666912997116	-0.00484	0.0278	10160701429937
ABCB6-3	ABCB6	x	GGAACGGGCACTCAATGTGT	95	133	117	153	186	186	145	216136800223497	0.606	241211571928964	0.0159	0.44	206069784035361	-0.00983	0.616	152203338083936
ABCB6-4	ABCB6	x	TAGGTGCCAAACCAATTGAG	407	394	346	470	308	385	385	25854607295085	0.02	0.111910652125655	0.911	0.99	258244216318161	0.00472	0.0153	101395947979003
ABCB7-1	ABCB7	x	AGTCATTAAAAAGTATCACA	135	137	101	137	159	104	129	211058971029925	0.101	0.365308711656067	0.715	0.966	209458757708903	-0.0127	0.114	107251661681794
ABCB7-2	ABCB7	x	CACACCACAGACAGCTACCG	88	56	54	99	42	69	68	183250891270624	0.0849	0.208945000737661	0.834	0.981	181954393554187	-0.0299	0.115	106061422264447
ABCB7-3	ABCB7	x	GATTAAATACCAAAGCACTC	220	169	102	126	136	128	147	216731733474818	-0.332	-115151861645222	0.25	0.831	221396023740331	-0.00952	-0.322	0.794434400096105
ABCB7-4	ABCB7	x	TCACAGTTGCAGTCACACGG	43	45	47	52	57	21	44	164345267648619	-0.0544	-0.114463347706824	0.909	0.989	165321251377534	-0.0392	-0.0152	0.9629948581345
ABCB8-1	ABCB8	x	AAGTACACAAGGGACCACGT	217	259	225	229	183	298	235	237106786227174	0.0184	0.0839177775578383	0.933	0.993	2368596763247	-0.00339	0.0218	101283558607684
ABCB8-2	ABCB8	x	CCTGCCCAAACAGGACAGAG	283	191	213	223	220	215	224	235024801833416	-0.0622	-0.294456161663835	0.768	0.973	235983548233989	-0.00402	-0.0582	0.957802429407994
ABCB8-3	ABCB8	x	CTTGGAACAAGGCGATGCCG	183	219	292	157	208	179	206	231386722036915	-0.351	-150488589547473	0.132	0.744	236423821573519	-0.00501	-0.346	0.784040454075739
ABCB8-4	ABCB8	x	TCTTTGACGCCAATAAGACA	43	75	79	59	86	87	72	185733249643127	0.236	0.633048022400588	0.527	0.93	181734497144193	-0.0288	0.265	117772278959498
ABCB9-1	ABCB9	x	GCCCCAGACGTAGTACATGT	142	277	166	177	169	190	187	22718416065365	-0.126	-0.481458445317481	0.63	0.951	229003461136252	-0.00629	-0.12	0.916368644675351
ABCB9-2	ABCB9	x	TGGACACCATCATGATGATG	204	98	182	244	282	262	212	232633586092875	0.703	276269746837726	0.00573	0.315	220772410692475	-0.00467	0.708	162788637014087
ABCB9-3	ABCB9	x	TGTCCTGGGAGATTGTATGG	132	73	122	62	139	118	108	203342375548695	-0.0357	-0.101918951363992	0.919	0.991	203742649794062	-0.0177	-0.018	0.975558302083125
ABCB9-4	ABCB9	x	TTTGCCGCAGGTATTCGGGG	117	118	116	83	141	127	117	206818586174616	2.82e-07	9.84921e+07	1	1	206818586174616	-0.0154	0.0154	100000019546752
ABCC10-1	ABCC10	x	AAGGGTGTCACCCTTAGCGG	162	142	180	135	142	155	153	21846914308176	-0.164	-0.694889564553217	0.487	0.919	220772410692475	-0.00869	-0.155	0.892546971472977
ABCC10-2	ABCC10	x	CAAGATGAGACCACCCACGA	126	111	110	144	95	112	116	206445798922692	0.0165	0.0592687284109556	0.953	0.995	206320822007121	-0.0156	0.0321	101150258019168
ABCC10-3	ABCC10	x	CGTGTACCAAGCTTACTGGA	161	171	162	192	232	129	174	22405492482826	0.163	0.647081087469708	0.518	0.927	221660569420398	-0.00707	0.17	111961288865424
ABCC10-4	ABCC10	x	GGGCCCTGAGAATCCCAACA	146	115	139	157	118	98	129	211058971029925	-0.101	-0.365878447390896	0.714	0.966	21249387366083	-0.0127	-0.0883	0.932386486436833
ABCC1-1	ABCC1	x	AAAATGTGATTGGCCCCAAG	299	295	285	114	146	149	215	233243845991561	-1.1	-536455215701203	8.12e-08	0.000195	246686762035411	-0.00451	-1.1	0.466516495768404
ABCC11-1	ABCC11	x	AATACACATCACCTCAGGAG	467	366	545	431	444	535	465	266745295288995	0.0331	0.19540728802234	0.845	0.982	266212796285194	0.00796	0.0251	102320839067758
ABCC11-2	ABCC11	x	CAAAGACCAGAGCTTTGCTG	192	216	193	210	198	223	205	231175386105575	0.0703	0.349425090805514	0.727	0.967	230175321728308	-0.00507	0.0754	104993498876781
ABCC11-3	ABCC11	x	GACGGTCGGAATAGACGGCG	264	258	279	236	317	289	274	243775056282039	0.072	0.387501343057123	0.698	0.963	242651126136458	-0.00099	0.073	105117290908771
ABCC11-4	ABCC11	x	TAAGCTTTGGATCATGAGCG	201	148	211	155	147	145	168	222530928172586	-0.325	-138475806555179	0.166	0.777	227106677228654	-0.00741	-0.318	0.79829838635665
ABCC1-2	ABCC1	x	AACCTGACAGCATCGAGCGA	383	433	304	271	307	352	342	253402610605613	-0.268	-14551564850179	0.146	0.758	257209676795052	0.00266	-0.271	0.830470024090894
ABCC12-1	ABCC12	x	AAAGACCATTAGGATCGGGA	467	507	472	588	607	604	541	273319726510657	0.315	24818438305176	0.0131	0.417	268304703823885	0.0106	0.304	124401165329847
ABCC12-2	ABCC12	x	ACGTACATTAAGGCTTCTGG	622	496	513	548	480	654	552	27419390777292	0.0444	0.290148440307904	0.772	0.973	273533270632061	0.0109	0.0335	103125420353837
ABCC12-3	ABCC12	x	GAGTCATATGTCGACAATGG	1	1	2	1	2	2	2	0.301029995663981	0.322	0.152727368451519	0.879	NA	0.1249387366083	-0.0515	0.374	125006230258521
ABCC12-4	ABCC12	x	GCCAACCCAGACTTTCCCAG	422	419	465	463	486	339	432	263548374681491	-0.02	-0.120955676826474	0.904	0.989	263882192221939	0.0067	-0.0267	0.986232704493359
ABCC1-3	ABCC1	x	AGTACACGGAAAGCTTGACC	165	168	111	42	88	115	115	206069784035361	-0.858	-245116100786987	0.0142	0.427	217026171539496	-0.0158	-0.842	0.55171687002098
ABCC1-4	ABCC1	x	TCTGCTTCGTCAGTGGCATG	272	255	252	178	200	137	216	233445375115093	-0.597	-282023050996862	0.0048	0.292	24144162029529	-0.00445	-0.593	0.661127302571287
ABCC2-1	ABCC2	x	CAGAATTCATCACAAACGCA	185	283	229	275	225	163	227	235602585719312	-0.0721	-0.300840502966115	0.764	0.973	236611152337835	-0.00385	-0.0682	0.95125233825896
ABCC2-2	ABCC2	x	CAGGGTATAAATCTTAGTGG	108	89	60	82	79	104	87	193951925261862	0.0442	0.132308147064011	0.895	0.988	193281186861163	-0.0244	0.0686	103111125125857
ABCC2-3	ABCC2	x	CATTATGGCAGGCCAACTTG	196	172	228	172	249	224	207	231597034545692	0.114	0.509816256797203	0.61	0.948	229812500502057	-0.00495	0.119	108222464452571
ABCC2-4	ABCC2	x	GATTGGTATATCGAACAGCA	171	178	171	219	167	194	183	226245108973043	0.158	0.724230457188493	0.469	0.915	223888208891514	-0.00655	0.165	111573932232496
ABCC3-1	ABCC3	x	CCACGTACACGTACACCCAG	399	230	271	277	296	265	290	246239799789896	-0.103	-0.484847358393732	0.628	0.951	247712125471966	-6.75e-05	-0.103	0.931094819830229
ABCC3-2	ABCC3	x	GCAGGGCGTACAGTCTTCGG	237	248	211	307	264	258	254	240483371661994	0.252	134731533327888	0.178	0.787	23654879848909	-0.00221	0.254	119085684936497
ABCC3-3	ABCC3	x	GGCCACATGAGAGTCCACCG	84	78	116	132	84	95	98	199122607569249	0.162	0.509870584229592	0.61	0.948	196692354119841	-0.0207	0.183	111883710103571
ABCC3-4	ABCC3	x	TGAACCACCAGAAAAACAGG	123	96	62	90	70	96	90	195424250943932	-0.134	-0.394635104834228	0.693	0.962	197158506518542	-0.0234	-0.111	0.911301280637142
ABCC4-1	ABCC4	x	AAGCACGGGTAAACCTTGCA	576	481	511	373	397	456	466	266838591669	-0.355	-239056455713386	0.0168	0.446	271822480362876	0.00799	-0.363	0.781869643128594
ABCC4-2	ABCC4	x	CAGATTGACTATCTGGCCTG	185	254	197	168	191	248	207	231597034545692	-0.0673	-0.29330134705578	0.769	0.973	232633586092875	-0.00495	-0.0624	0.954422526918224
ABCC4-3	ABCC4	x	GAAGGTACGATTCCTTAGTG	158	217	130	67	175	168	152	218184358794477	-0.301	-0.907032523590368	0.364	0.884	2226170123399	-0.00882	-0.292	0.811689580977279
ABCC4-4	ABCC4	x	GCGTCACTGCCACGAACACG	199	104	139	72	215	161	148	217026171539496	0.0195	0.0554396426996799	0.956	0.995	216830101462943	-0.00938	0.0289	101360812910067
ABCC5-1	ABCC5	x	TACGGAAAGAGGCACCCATG	282	213	225	217	246	199	230	236172783601759	-0.121	-0.591367801630227	0.554	0.937	238021124171161	-0.00368	-0.117	0.919550046151658
ABCC5-2	ABCC5	x	TGAAAAGGGCCATAATAACC	147	117	137	114	130	92	123	20899051114394	-0.255	-0.945110030934144	0.345	0.877	212602311790052	-0.014	-0.241	0.837987134667949
ABCC5-3	ABCC5	x	TGTTAAGACTAGAGAGACTG	92	176	128	181	229	154	160	220411998265593	0.51	183101965033319	0.0671	0.648	212057393120585	-0.00797	0.518	142405019559707
ABCC5-4	ABCC5	x	TTTATTCATAGAAATCCGCG	66	22	44	98	54	79	60	177815125038364	0.807	181048183398289	0.0702	0.655	164345267648619	-0.0325	0.84	174956952981164
ABCC6-1	ABCC6	x	ACTATGATCCAATCAGCCTG	180	198	263	186	281	197	218	23384564936046	0.0509	0.216274089667873	0.829	0.98	232973677479916	-0.00434	0.0552	10359109571955
ABCC6-2	ABCC6	x	CAGACCACGATCCAGACGAG	108	184	182	126	162	98	143	215533603746506	-0.296	-101843975571347	0.308	0.861	219865708695442	-0.0101	-0.286	0.814507563070215
ABCC6-3	ABCC6	x	GAGAACTGTGAGAGTCACAA	168	201	200	151	160	187	178	225042000230889	-0.192	-0.865542184430282	0.387	0.891	227799101167541	-0.00685	-0.185	0.875391329694264
ABCC6-4	ABCC6	x	GGACAGCATCCAATACGGCA	179	149	165	248	172	200	186	226951294421792	0.331	145049156793063	0.147	0.759	221572566455757	-0.00636	0.337	125788497183602
ABCC8-1	ABCC8	x	CAGACCAACGAGATGCTCCG	180	191	236	144	218	159	188	227415784926368	-0.22	-0.927633863816198	0.354	0.882	23060674363556	-0.00622	-0.214	0.858565436437754
ABCC8-2	ABCC8	x	CTACCGTCAAAGCTCTAGTG	139	77	114	99	143	99	112	204921802267018	0.0473	0.151889818914422	0.879	0.986	204139268515822	-0.0166	0.0639	103332924011952
ABCC8-3	ABCC8	x	GATGTTGTGATAGTAGACCA	126	137	180	192	255	206	183	226245108973043	0.56	23726225399892	0.0177	0.452	216928247150341	-0.00655	0.567	14742692172911
ABCC8-4	ABCC8	x	TCAACGCCAGCGAATCAGTG	129	131	145	169	110	108	132	212057393120585	-0.0656	-0.240586998597594	0.81	0.978	213033376849501	-0.0121	-0.0535	0.955547833772913
ABCC9-1	ABCC9	x	AGAGAGGAAAACTCTCCGAC	188	183	184	206	195	187	190	227875360095283	0.0833	0.405854930593652	0.685	0.96	226717172840301	-0.00607	0.0894	105943861584686
ABCC9-2	ABCC9	x	ATACACTATCGATGTTGTAG	358	350	247	237	305	298	299	247567118832443	-0.185	-0.932792309857141	0.351	0.88	250288211686408	0.000425	-0.185	0.879649075922436
ABCC9-3	ABCC9	x	GACTGCAAATCTGACCACCG	181	130	130	153	168	135	150	217609125905568	0.0483	0.192006415065227	0.848	0.982	216731733474818	-0.00909	0.0574	103404573765933
ABCC9-4	ABCC9	x	TAAAGTACTGAATTGGCGCA	298	280	170	197	217	263	238	237657695705651	-0.144	-0.610746766291441	0.541	0.934	23967803431448	-0.0032	-0.141	0.905006462882905
ABCD1-1	ABCD1	x	AGTTCCTCATGAAGTATGTG	259	410	206	356	284	291	301	247856649559384	0.0895	0.38632659836705	0.699	0.963	246488679830265	0.000532	0.089	106400136377294
ABCD1-2	ABCD1	x	CTACATGCACTCGCGTGTGG	120	139	198	144	135	168	151	217897694729317	-0.0319	-0.121436916297688	0.903	0.989	218279494535019	-0.00895	-0.0229	0.978131269990864
ABCD1-3	ABCD1	x	GATCATGTCGTCGTACAAGG	383	274	287	285	182	295	284	245331834004704	-0.309	-140582469247508	0.16	0.771	249785073957841	-0.000407	-0.309	0.807201074504765
ABCD1-4	ABCD1	x	GGCCACATACACCGACAGGA	276	294	298	231	285	236	270	243136376415899	-0.207	-113773592321307	0.255	0.834	246139847045683	-0.00123	-0.206	0.866336856400087
ABCD2-1	ABCD2	x	ATTACCTCTCAGTGACACAT	539	505	515	376	442	533	485	268574173860226	-0.207	-133963439071964	0.18	0.788	271572486046918	0.00868	-0.216	0.866336856400087
ABCD2-2	ABCD2	x	CCCTGACCAATCTCTTACGG	166	264	163	219	159	257	205	231175386105575	0.0987	0.385372504462229	0.7	0.963	22959334386446	-0.00507	0.104	107080813174733
ABCD2-3	ABCD2	x	CCTTATTGCACTGTTGACGA	282	407	526	355	479	491	423	262634036737504	0.125	0.603652924588822	0.546	0.935	260745502321467	0.00634	0.119	109050773266526
ABCD2-4	ABCD2	x	CTGGAGCTGATGCTATTGAA	304	421	379	366	418	491	396	259769518592551	0.208	118495475370239	0.236	0.825	256584781867352	0.00521	0.203	115508578455358
ABCD3-1	ABCD3	x	AATTAAACTTACAAGAGGCA	95	92	34	99	98	103	87	193951925261862	0.441	116400194716558	0.244	0.83	186727101896545	-0.0244	0.465	135754497988001
ABCD3-2	ABCD3	x	ACTCGACTTCGAAGACCCAT	149	190	139	59	143	145	138	213987908640124	-0.462	-142788675683259	0.153	0.765	220230664189246	-0.011	-0.451	0.725979139951947
ABCD3-3	ABCD3	x	TGGCAAATATGAGCGCACAA	174	179	187	163	151	193	174	22405492482826	-0.091	-0.410972548575293	0.681	0.96	225527250510331	-0.00707	-0.0839	0.938871747315452
ABCD3-4	ABCD3	x	TGTGTACTCTTGAGATGTCG	115	93	86	61	79	62	83	191907809237607	-0.541	-167870247774172	0.0932	0.692	199122607569249	-0.0256	-0.515	0.687294347786015
ABCD4-1	ABCD4	x	AGCCACATCTGAGAGCGTCG	75	97	83	119	101	86	94	19731278535997	0.263	0.864618086607569	0.387	0.892	192941892571429	-0.022	0.285	119997138237322
ABCD4-2	ABCD4	x	GATCCCCAGTCAGTACTATG	185	244	213	239	257	202	223	234830486304816	0.121	0.58215631219337	0.56	0.939	233041377334919	-0.00407	0.125	108748839085488
ABCD4-3	ABCD4	x	GTAGTAGACGAGGGTGAACG	271	147	303	280	218	244	244	238738982633873	0.0414	0.166258219420146	0.868	0.984	238081400999977	-0.00283	0.0442	102911199877421
ABCD4-4	ABCD4	x	TTGCGATGACAACGTAACTC	132	194	139	249	188	176	180	225527250510331	0.399	161802860135711	0.106	0.712	219033169817029	-0.00673	0.406	131859361449237
ABCE1-1	ABCE1	x	AGTTGTCCTGTAGTTCGAAT	60	48	67	60	72	136	74	186923171973098	0.615	157598765351217	0.115	0.725	176591679396663	-0.0282	0.643	153155799709438
ABCE1-2	ABCE1	x	CAATTGATAAGGCGCCAAAG	48	44	18	60	18	78	44	164345267648619	0.504	0.897311568053876	0.37	0.886	156427143043856	-0.0392	0.543	141814003567946
ABCE1-3	ABCE1	x	CCAAAACTTCACCTGGACGA	43	35	75	34	31	72	48	168124123737559	-0.159	-0.327247886478446	0.743	0.969	170757017609794	-0.0373	-0.122	0.895645670090849
ABCE1-4	ABCE1	x	TTTCAGATATATCATTGTGG	45	15	15	11	11	7	17	123044892137827	-1.37	-182091395969219	0.0686	0.652	139794000867204	-0.0583	-1.31	0.386891248385597
ABCF1-2	ABCF1	x	GATGGAGTATGAGCGCCAAG	96	109	116	114	210	91	123	20899051114394	0.371	114263295183529	0.253	0.833	202938377768521	-0.014	0.385	129324893188749
ABCF1-3	ABCF1	x	GCAACACATCAATGTTGGGA	64	71	59	107	87	57	74	186923171973098	0.372	104063874778757	0.298	0.858	181068047521056	-0.0282	0.4	129414565448285
ABCF1-4	ABCF1	x	TGTAATTGCCCCTATAGTAG	12	30	22	24	1	5	16	120411998265592	-1.09	-118937083151605	0.234	0.824	132905871926422	-0.0593	-1.03	0.469761374607006
ABCF2-1	ABCF2	x	AACCAATGAGGCCATAACGA	447	396	355	696	640	543	513	271011736511182	0.649	431771626964612	1.58e-05	0.0108	260133556333363	0.00964	0.639	156808090815148
ABCF2-2	ABCF2	x	ATGATCAGTACGTGAAGACG	97	172	156	209	152	183	162	220951501454263	0.356	133385758643421	0.182	0.79	215126767533065	-0.00781	0.364	127987241384431
ABCF2-3	ABCF2	x	CAGTCCATGCAAGATCCGCG	150	242	187	335	261	297	245	238916608436453	0.625	287194754378502	0.00408	0.274	228555730900777	-0.00277	0.628	154221082540794
ABCF2-4	ABCF2	x	GGGTCGTGAGCGATAAGGTG	259	339	279	265	313	456	318	250242711998443	0.238	111853352024776	0.263	0.839	246587833864638	0.00142	0.237	117935659226122
ABCF3-1	ABCF3	x	ACTTCCAGGACTGCTAAAGA	243	245	173	173	226	191	208	231806333496276	-0.164	-0.733870839671251	0.463	0.914	234308020476598	-0.0049	-0.159	0.892546971472977
ABCF3-2	ABCF3	x	CAGCGGCTAGATGGTTACCG	288	249	267	264	296	299	277	244247976906445	0.0955	0.540151275738254	0.589	0.944	242813479402879	-0.000813	0.0963	106843563546279
ABCF3-3	ABCF3	x	GCAGAGTGTTGTACATGCGC	180	213	146	184	202	247	195	229003461136252	0.232	100916010986322	0.313	0.863	225446751046708	-0.0057	0.238	117446197121365
ABCF3-4	ABCF3	x	TGCGAGAGGATTTGCTACGG	118	246	153	126	150	190	164	22148438480477	-0.15	-0.516046784049069	0.606	0.947	223636928837428	-0.00767	-0.142	0.90125046261083
ABCG1-1	ABCG1	x	ATGAAAGGGCTCGCTCAAGG	137	139	216	159	117	153	154	218752072083646	-0.198	-0.739618064580384	0.46	0.913	22148438480477	-0.00857	-0.189	0.871758239537062
ABCG1-2	ABCG1	x	CTTCAGGAACCGAATAGGAA	192	160	193	120	130	134	155	219033169817029	-0.505	-216691661542846	0.0302	0.53	225927524755698	-0.00846	-0.497	0.70466037757101
ABCG1-3	ABCG1	x	GACCACAAGAGAGACCTCGG	221	140	219	273	200	180	206	231386722036915	0.171	0.692221413980378	0.489	0.92	228630673884327	-0.00501	0.176	112583858613676
ABCG1-4	ABCG1	x	GAGGCCGATCCCAATGTGCG	129	136	132	98	90	97	114	205690485133647	-0.478	-181181423103704	0.07	0.654	212166925204345	-0.0161	-0.462	0.717972255311718
ABCG2-1	ABCG2	x	AAAAAACGAACGGATTAACA	439	542	440	96	64	101	280	244715803134222	-2.44	-115265848176817	9.69e-31	3.62e-26	267547282320781	-0.000638	-2.44	0.184283652161388
ABCG2-2	ABCG2	x	GAATTACATCAACTTTCCGG	265	248	281	35	26	50	151	217897694729317	-2.84	-10121153338284	4.45e-24	7.17e-20	242269924770743	-0.00895	-2.83	0.139660892259028
ABCG2-3	ABCG2	x	GGAAGGCTCTATGATCTCTG	361	386	390	111	118	70	239	237839790094814	-1.93	-874058496464157	2.32e-18	2.88e-14	257863920996807	-0.00314	-1.93	0.262429170905767
ABCG2-4	ABCG2	x	TAACTTAGGATGTCTAAGCA	325	421	336	46	25	50	200	230102999566398	-3.16	-119280296841688	8.46e-33	6.31e-28	255710600605089	-0.00537	-3.15	0.111878133865997
ABCG4-1	ABCG4	x	CTCTGTGTCCCCAGTCATCG	689	726	600	584	656	646	650	281291335664286	-0.0955	-0.750920778236164	0.453	0.911	282715379575747	0.0137	-0.109	0.935947816423077
ABCG4-2	ABCG4	x	GGTGGAGAGAACTACCTGGT	88	58	41	71	46	58	60	177815125038364	-0.0957	-0.233717841231271	0.815	0.979	179472035181684	-0.0325	-0.0632	0.935818075498219
ABCG4-3	ABCG4	x	GTGGGACATGAACCGTAGGT	384	291	452	341	334	515	386	258658730467176	0.0785	0.381244327849675	0.703	0.963	257480266132644	0.00477	0.0737	105591960807994
ABCG4-4	ABCG4	x	TGGAGCTGTCCTATTCCGTG	368	415	439	402	409	397	405	260745502321467	-0.0166	-0.111705952961769	0.911	0.99	260994995118687	0.00559	-0.0222	0.988559700455399
ABCG5-1	ABCG5	x	ACACCTGAAAACGTTACCAA	159	223	176	168	198	194	186	226951294421792	0.00516	0.0229202865680712	0.982	0.998	226951294421792	-0.00636	0.0115	1003583043259
ABCG5-2	ABCG5	x	GGCTCGCAGGAACCGAATTG	197	172	176	214	188	149	183	226245108973043	0.0158	0.0696416446637292	0.944	0.994	225927524755698	-0.00655	0.0224	101101191512428
ABCG5-3	ABCG5	x	GGTGCTATCCAGGACCGCGT	60	46	74	88	83	56	68	183250891270624	0.335	0.901834066275998	0.367	0.885	177815125038364	-0.0299	0.365	126137740883125
ABCG5-4	ABCG5	x	TGATTGGCAACTACAGCTTG	138	188	163	95	176	88	141	214921911265538	-0.446	-148604949999539	0.137	0.75	221218760440396	-0.0105	-0.436	0.734075318017052
ABCG8-1	ABCG8	n	CACCCCCATCTACTTAGGGG	224	236	222	233	256	264	239	237839790094814	0.143	0.768000512943346	0.442	0.908	235666311993682	-0.00314	0.146	110419884716309
ABCG8-2	ABCG8	n	CAGTGCGCTGACACCCGCGT	266	316	241	158	348	194	254	240483371661994	-0.234	-0.900130812125487	0.368	0.885	243827858049261	-0.00221	-0.232	0.850274160064196
ABCG8-3	ABCG8	n	CTCAAACCAAGGGACCTGAG	491	409	496	428	638	378	473	267486114073781	0.0488	0.261645995509068	0.794	0.976	266776416356748	0.00825	0.0406	103440417271162
ABCG8-4	ABCG8	n	GAGTCCTACGAAGATGCCTG	209	389	379	381	304	334	333	252244423350632	0.0607	0.276512162038624	0.782	0.975	251277330899911	0.0022	0.0585	104297169111272
ABHD10-1	ABHD10	x	TAATTGATGACTTAGCTGAT	227	185	221	197	139	156	188	227415784926368	-0.364	-160073232613481	0.109	0.718	232428245529769	-0.00622	-0.358	0.777007268784049
ABHD10-2	ABHD10	x	TACCTCAGCGGGCGCCACGG	120	206	189	162	181	138	166	222010808804005	-0.0985	-0.379487324961121	0.704	0.963	223468597432153	-0.00753	-0.091	0.934003589806141
ABHD10-3	ABHD10	x	TCATATAAGAAAGATAGCCA	48	142	153	134	110	102	115	206069784035361	0.0126	0.0340401705897425	0.973	0.997	205817286532311	-0.0158	0.0284	100877190410723
ABHD10-4	ABHD10	x	TGCACGACCAGAGAAGGTCG	93	100	186	147	88	222	139	214301480025409	0.27	0.771193742098473	0.441	0.908	210151795524841	-0.0108	0.281	120580782769076
ABHD1-1	ABHD1	x	AGCCCCTAGTCCTTTATCAG	113	148	125	114	159	96	126	210037054511756	-0.065	-0.229597805466004	0.818	0.979	210946604995209	-0.0133	-0.0517	0.955945317593742
ABHD11-1	ABHD11	x	ACGGTGGATGCTCGTAACCA	597	557	442	425	484	468	496	26954816764902	-0.213	-140447693112866	0.16	0.771	272591163229505	0.00907	-0.222	0.862741344542656
ABHD11-2	ABHD11	x	CTGCCACATAGGTTGCAAAG	335	379	345	290	290	269	318	250242711998443	-0.319	-194357198076801	0.0519	0.61	254777470538782	0.00142	-0.32	0.801625329399394
ABHD11-3	ABHD11	x	GAGCCCGTGCAAAAAGACGA	276	222	218	261	195	293	244	238738982633873	0.065	0.305568710794512	0.76	0.972	237779176758819	-0.00283	0.0678	104608493979253
ABHD11-4	ABHD11	x	GCTGTGGCCAACGACGACGC	158	126	186	108	119	146	140	214612803567824	-0.333	-126877355354969	0.205	0.806	219497660321605	-0.0106	-0.322	0.793883930931652
ABHD1-2	ABHD1	x	GACCCTACCGTTCCACAAGT	183	165	144	185	94	153	154	218752072083646	-0.188	-0.677911322518239	0.498	0.922	22148438480477	-0.00857	-0.179	0.877821797609519
ABHD12-1	ABHD12	x	AGGTGACCACATGGTAACCA	261	327	350	362	280	302	314	249692964807321	0.0092	0.0496267670024947	0.96	0.995	24950815836594	0.00122	0.00798	100639733012208
ABHD12-2	ABHD12	x	CCTACGCCTGACGGGCCCGG	216	204	315	250	223	256	244	238738982633873	-0.0118	-0.0551656230829999	0.956	0.995	238916608436453	-0.00283	-0.00897	0.991854221399365
ABHD12-3	ABHD12	x	GAGTGGCCCCAGATGTACAC	287	269	366	400	366	350	340	253147891704225	0.275	157403942408062	0.115	0.726	248760966633397	0.00256	0.272	120999408921929
ABHD12-4	ABHD12	x	GCAGGTACAGAATGATAGGG	160	178	169	153	140	118	153	21846914308176	-0.303	-128288560004549	0.2	0.802	222788670461367	-0.00869	-0.294	0.810565119885309
ABHD12B-1	ABHD12B	x	CCAAGACAATAGCATCAACT	257	332	277	196	288	253	267	242651126136458	-0.233	-114334404478496	0.253	0.833	246039663729768	-0.00141	-0.232	0.850863729506541
ABHD12B-2	ABHD12B	x	GTCTTGTCTGTTGACTACAG	261	253	170	181	147	228	207	231597034545692	-0.299	-122976309003431	0.219	0.816	235793484700045	-0.00495	-0.294	0.81281560198432
ABHD12B-3	ABHD12B	x	TAATTGGGTTCCCATCACGA	131	154	124	149	120	146	137	213672056715641	0.021	0.0837975990413456	0.933	0.993	213460205328768	-0.0112	0.0322	101466254658088
ABHD12B-4	ABHD12B	x	TTGTGTCTATGAGTGGACCA	201	259	218	292	209	187	228	235793484700045	0.0211	0.0944872668644623	0.925	0.992	23541084391474	-0.00379	0.0249	101473288006676
ABHD1-3	ABHD1	x	GCTGTCGTGTTTAACAACCG	168	112	169	160	103	139	142	215228834438306	-0.16	-0.57805544701542	0.563	0.939	217512508628366	-0.0103	-0.15	0.895025070927972
ABHD13-1	ABHD13	x	AATAGCCACTGCTCCACCCA	675	728	674	782	621	700	697	284323277809801	0.0179	0.143111071472322	0.886	0.987	284031524181544	0.0149	0.003	101248462483187
ABHD13-2	ABHD13	x	CATGGGAATGCAGGCAACAT	431	486	485	450	451	480	464	266651798055488	-0.0218	-0.156870873164864	0.875	0.986	266962675891098	0.00792	-0.0297	0.985002983839253
ABHD13-3	ABHD13	x	GGGAACATAAAGACGTGAAG	278	308	393	235	403	291	318	250242711998443	-0.0756	-0.351472357672037	0.725	0.967	251366143708348	0.00142	-0.077	0.948947382750996
ABHD13-4	ABHD13	x	TAGGATTTCAGCCATTATGG	359	352	323	387	337	374	355	255022835305509	0.0866	0.550278879079878	0.582	0.943	253739928403826	0.00331	0.0833	106186473425884
ABHD1-4	ABHD1	x	GGTGCAAGACGTATGTCTCC	70	73	73	96	50	106	78	189209460269048	0.222	0.615049126007899	0.539	0.933	185733249643127	-0.0272	0.249	116634936978847
ABHD14A-1	ABHD14A	x	AGGCCTTTAACTCTCACACG	520	478	485	513	519	513	505	270329137811866	0.0591	0.452371998553892	0.651	0.956	269401989630872	0.00937	0.0497	104181563966289
ABHD14A-2	ABHD14A	x	CTGGCAGCCCCACATACAGT	467	397	423	465	465	429	441	264443858946784	0.0785	0.545335950231478	0.586	0.944	263245729218472	0.00705	0.0714	105591960807994
ABHD14A-3	ABHD14A	x	GGAGGTACAGAATGCCGTGT	332	326	274	256	269	344	300	247712125471966	-0.101	-0.542213891561271	0.588	0.944	249229465763432	0.000479	-0.101	0.932386486436833
ABHD14A-4	ABHD14A	x	TCCCACTCAACCAGGCACAC	401	367	394	462	403	431	410	261278385671974	0.157	107017602558964	0.285	0.85	258808487333465	0.0058	0.151	11149662187277
ABHD14B-1	ABHD14B	x	AGAACCTGGGTACACTGCAC	599	886	610	568	627	724	669	282542611776782	-0.127	-0.790464348511357	0.429	0.904	284406277258265	0.0142	-0.141	0.915733686418126
ABHD14B-2	ABHD14B	x	GAGAGGCCCTGCCCGGCAGT	503	578	451	482	400	615	505	270329137811866	-0.0333	-0.195910125354251	0.845	0.982	270813751057692	0.00937	-0.0427	0.977182545884306
ABHD14B-3	ABHD14B	x	TGATGGACTGATCACAACCG	323	340	350	355	422	349	356	255144999797288	0.153	0.950366408619182	0.342	0.875	252848819064062	0.00336	0.15	111187915751711
ABHD14B-4	ABHD14B	x	TGCAGGTCTGGGGCACTCCA	572	522	513	515	597	574	549	273957234445009	0.0692	0.524548324706254	0.6	0.945	272889462204368	0.0108	0.0584	104913475845418
ABHD15-1	ABHD15	x	CAAACAAGGCTGCACCCTCC	232	293	258	322	227	268	267	242651126136458	0.0613	0.308713379595343	0.758	0.972	241664050733828	-0.00141	0.0627	104340554105528
ABHD15-2	ABHD15	x	CTGGTGATCCCCAATGCGTG	66	87	74	114	65	145	92	196378782734556	0.513	147059043567674	0.141	0.753	187890460247346	-0.0227	0.536	142701450571788
ABHD15-3	ABHD15	x	GGCCGGCCTCGAACCACTCT	43	67	74	22	93	78	63	179934054945358	0.0689	0.143857917904752	0.886	0.987	178769656828987	-0.0315	0.1	104891661969535
ABHD15-4	ABHD15	x	TGTATGTGACCGCCTCCTTG	311	251	314	279	304	348	301	247856649559384	0.0879	0.484803674433708	0.628	0.951	246538285144842	0.000532	0.0874	106282200259786
ABHD16A-1	ABHD16A	x	ACCATGTTTGTGGACCGGCG	273	319	296	281	292	406	311	249276038902684	0.141	0.739326192536299	0.46	0.913	247129171105894	0.00106	0.14	110266916306891
ABHD16A-2	ABHD16A	x	ATCTACGCCTGGTCCATCGG	399	347	546	449	407	493	440	264345267648619	0.0623	0.349999092634852	0.726	0.967	26341412589394	0.00701	0.0553	104412902537584
ABHD16A-3	ABHD16A	x	CCATCTTGGAAGCAACACAT	336	393	535	426	424	482	433	263648789635337	0.0756	0.425047757247375	0.671	0.958	26246258192267	0.00674	0.0689	105379920760306
ABHD16A-4	ABHD16A	x	CTCAGGAAGGAGTCTCGAGG	170	221	163	124	149	140	161	220682587603185	-0.424	-177315258900342	0.0762	0.665	226638851000877	-0.00789	-0.416	0.74535519339946
ABHD16B-1	ABHD16B	x	CAGACCAGCCGTAGACCACC	156	126	128	79	139	179	134	212710479836481	-0.0465	-0.152318221063017	0.879	0.986	213566260200007	-0.0117	-0.0348	0.968282549908398
ABHD16B-2	ABHD16B	x	CATCTGCTGCGAAGGCAACG	160	181	187	193	123	146	165	221748394421391	-0.193	-0.785871387388523	0.432	0.905	224551266781415	-0.0076	-0.185	0.874784764905822
ABHD16B-3	ABHD16B	x	GCGCACGTCATCCCAGCGGA	223	174	161	147	100	171	163	221218760440396	-0.417	-158469698281689	0.113	0.723	226951294421792	-0.00774	-0.409	0.748980467212091
ABHD16B-4	ABHD16B	x	GGCCGCTGGCTCGTGTACCC	136	178	170	91	166	101	140	214612803567824	-0.435	-152288393422151	0.128	0.739	220772410692475	-0.0106	-0.424	0.739693754624419
ABHD17A-1	ABHD17A	x	ACCGTAGCCGGAGTAGTCGT	58	131	76	64	61	39	72	185733249643127	-0.692	-173120891647433	0.0834	0.675	194612461921715	-0.0288	-0.663	0.618995145418723
ABHD17A-2	ABHD17A	x	AGGCTCTCAGGGTCCCCAAG	295	275	354	276	349	353	317	250105926221775	0.0819	0.449870078214242	0.653	0.956	248855071650044	0.00137	0.0805	105841102887044
ABHD17A-3	ABHD17A	x	GCGCGAGCTGGACACCATCG	97	74	133	83	103	147	106	202530586526477	0.131	0.400122083528841	0.689	0.961	200575232888909	-0.0183	0.149	109505247079357
ABHD17A-4	ABHD17A	x	TACACGGTCCTCTTCTCGCA	60	43	121	109	20	84	73	186332286012046	-0.0726	-0.140568228769212	0.888	0.987	18731267636145	-0.0285	-0.0441	0.950922716443234
ABHD17B-1	ABHD17B	x	CTTGGCTTGCTCTTAGGACA	575	513	555	443	657	586	555	274429298312268	0.0373	0.240360215186717	0.81	0.978	27385163087154	0.011	0.0263	102619151367835
ABHD17B-2	ABHD17B	x	GAGTAAAGTGTATTTCGCAT	419	356	363	570	387	400	416	261909333062674	0.254	143324188850775	0.152	0.763	257902100733939	0.00605	0.248	119250887233063
ABHD17B-3	ABHD17B	x	TATAGGGACAGTACCGTCTG	388	398	511	449	412	364	420	26232492903979	-0.0824	-0.501475263933791	0.616	0.949	263581872136442	0.00621	-0.0886	0.944485137807252
ABHD17B-4	ABHD17B	x	TTCATGACTAGAACCAGTAA	428	321	449	442	414	474	421	262428209583567	0.151	0.916068626625811	0.36	0.883	260133556333363	0.00626	0.145	111033883362864
ABHD17C-1	ABHD17C	x	ACGCCGACATCGACGCCGCG	622	502	520	399	446	397	481	268214507637383	-0.405	-276874046217914	0.00563	0.312	273878055848437	0.00854	-0.414	0.755236292781413
ABHD17C-2	ABHD17C	x	GCCGTATCCCGAGTAGTCGT	322	223	185	206	221	213	228	235793484700045	-0.19	-0.832173125722802	0.405	0.897	238620160540079	-0.00379	-0.186	0.876605721316035
ABHD17C-3	ABHD17C	x	GCGCGAGAAGAAGACCTCGA	502	554	596	627	464	454	533	272672720902657	-0.0966	-0.620677498604192	0.535	0.931	27408887882647	0.0103	-0.107	0.935234463860595
ABHD17C-4	ABHD17C	x	TCCCAATGCTCTGACCATAG	378	411	225	293	278	371	326	251321760006794	-0.106	-0.482860318526597	0.629	0.951	252891670027765	0.00184	-0.108	0.929160674250913
ABHD2-1	ABHD2	x	AGGTGACCTACCTGTGCGAG	278	331	221	195	218	249	249	239619934709574	-0.326	-155640942434325	0.12	0.731	244195683765641	-0.00252	-0.323	0.797745239809033
ABHD2-2	ABHD2	x	GCTCAGCCAAGGGCTCGAAG	226	227	194	193	143	163	191	228103336724773	-0.375	-17097145084404	0.0873	0.682	233378302594904	-0.00599	-0.369	0.77110541270397
ABHD2-3	ABHD2	x	GGGCGTAGTCAACGAAAGTG	118	116	187	96	101	142	127	210380372095596	-0.313	-105642371743973	0.291	0.854	214716084111601	-0.0131	-0.3	0.804966137621122
ABHD2-4	ABHD2	x	TTTGCCCACAGGCTGCACGT	183	207	243	163	179	170	191	228103336724773	-0.306	-141785437849282	0.156	0.767	232428245529769	-0.00599	-0.3	0.808881348361739
ABHD3-1	ABHD3	x	ACTCCTTGCTTGTTCCCGTG	278	294	280	278	216	290	273	243616264704076	-0.12	-0.642515271342925	0.521	0.928	245331834004704	-0.00105	-0.119	0.920187650624875
ABHD3-2	ABHD3	x	GGGGGCTTCGAAGTGATGAA	159	118	139	191	214	161	164	22148438480477	0.444	185478024148793	0.0636	0.64	214197207590708	-0.00767	0.452	136037085240596
ABHD3-3	ABHD3	x	GTCACTACTTCCAGACGCCA	103	183	195	95	143	176	149	217318626841227	-0.216	-0.710308843496706	0.478	0.917	220502382165417	-0.00923	-0.207	0.860949188338904
ABHD3-4	ABHD3	x	TAGTACGTTTCTGTAACCAC	80	148	101	74	154	161	120	207918124604762	0.242	0.706569328038237	0.48	0.918	204007464323031	-0.0147	0.257	118263100024414
ABHD4-1	ABHD4	x	GACATCGATAGAGACATGGC	274	390	323	263	407	277	322	250785587169583	-0.0597	-0.287521332335378	0.774	0.973	251719589794997	0.00163	-0.0613	0.959463613432279
ABHD4-2	ABHD4	x	GCTACTCGAAGAACAGCCAA	104	70	93	70	40	51	71	185125834871908	-0.73	-199357824572165	0.0462	0.593	194939000664491	-0.0291	-0.701	0.60290391384538
ABHD4-3	ABHD4	x	GGAGGGATACATATCTGGCC	104	96	189	114	132	92	121	208278537031645	-0.203	-0.639688667664728	0.522	0.929	211282834660605	-0.0144	-0.189	0.868742185150623
ABHD4-4	ABHD4	x	GGGGTGCACGGATCTCACTG	311	339	273	266	259	241	282	245024910831936	-0.269	-150737272633014	0.132	0.743	248808044630625	-0.000522	-0.268	0.829894585589983
ABHD5-1	ABHD5	x	GGTCGTTCAGGGAAACCCCA	156	128	129	228	170	141	159	220139712432045	0.384	150435865690474	0.132	0.745	213882879693674	-0.00806	0.392	130495494768896
ABHD5-2	ABHD5	x	GTGGAGATGTGCCCTAGGAT	44	47	117	67	72	27	62	179239168949825	-0.325	-0.673935783948728	0.5	0.923	18409420802431	-0.0318	-0.293	0.79829838635665
ABHD5-3	ABHD5	x	TAAGGTGTGATATAGACGTA	60	127	94	160	143	125	118	207188200730613	0.607	196100278185451	0.0499	0.604	197158506518542	-0.0151	0.622	152308873970326
ABHD5-4	ABHD5	x	TTGGACGAAGTAGTAGACCC	234	162	212	220	218	267	219	234044411484012	0.214	0.990135565257243	0.322	0.866	230678232455307	-0.00429	0.218	115989965450543
ABHD6-1	ABHD6	x	AGTCTTCATGGTGAACATAG	249	247	283	173	205	209	228	235793484700045	-0.408	-207518820784109	0.038	0.563	24144162029529	-0.00379	-0.404	0.753667454779191
ABHD6-2	ABHD6	x	CAAGGATATGTGGCTCAGTG	515	461	570	466	527	520	510	270757017609794	-0.0311	-0.220862979387951	0.825	0.98	271208823486264	0.00954	-0.0406	0.978673811547031
ABHD6-3	ABHD6	x	CTGACAATCAATTTGTACAA	405	379	380	418	438	367	398	259988307207369	0.0713	0.472308745514808	0.637	0.953	258883172559421	0.00529	0.066	105066300052555
ABHD6-4	ABHD6	x	GCAAGTTAAGAGGATACACC	104	121	121	173	112	151	130	211394335230684	0.334	124159588547314	0.214	0.813	206195484407311	-0.0125	0.347	126050339158299
ABHD8-1	ABHD8	x	GATGAAAAAGAGCACCACGT	78	22	22	94	45	40	50	169897000433602	0.553	100636746525362	0.314	0.863	160923857595509	-0.0364	0.589	146713334416732
ABHD8-2	ABHD8	x	GCCGGGCTTGACCTCTACAA	84	56	65	73	91	64	72	185733249643127	0.153	0.437357567532618	0.662	0.957	183463260633609	-0.0288	0.182	111187915751711
ABHD8-3	ABHD8	x	GTACCCAGACCTAGTGCACA	395	397	344	355	371	337	366	256348108539441	-0.0958	-0.615199950090314	0.538	0.933	257825707665534	0.00384	-0.0996	0.935753211780196
ABHD8-4	ABHD8	x	TCACCGTGTACCGCAATGGG	195	255	123	200	164	197	189	227646180417324	-0.0305	-0.115634278365974	0.908	0.989	228103336724773	-0.00615	-0.0244	0.979080915191884
ABI1-1	ABI1	x	GAGTTACCAGAACCTGACTC	242	278	303	170	239	268	250	239794000867204	-0.282	-132087671661664	0.187	0.793	243827858049261	-0.00245	-0.28	0.822450068712464
ABI1-2	ABI1	x	GTTGTGTCGAGATATCTGCC	291	286	358	402	274	350	327	251454775266029	0.134	0.708181142105864	0.479	0.918	249369035615286	0.00189	0.132	109733193757924
ABI1-3	ABI1	x	GTTTCCGAATATACCTTACA	248	184	160	228	233	289	224	235024801833416	0.341	152978243488283	0.126	0.737	229520045200326	-0.00402	0.345	126663425372322
ABI1-4	ABI1	x	TCGCCACCCACTATTGGACC	243	229	291	226	293	203	248	239445168082622	-0.0797	-0.383072692343149	0.702	0.963	240540328323522	-0.00258	-0.0771	0.946254394338287
ABI2-1	ABI2	x	ACGAACTGGTCGTTCAAGGT	163	170	137	229	160	252	185	226717172840301	0.448	187164597614549	0.0613	0.638	219497660321605	-0.00643	0.454	136414783487935
ABI2-2	ABI2	x	CATACTCCCCCAACAATAGG	156	158	186	177	208	181	178	225042000230889	0.179	0.813649422792385	0.416	0.9	222184874961636	-0.00685	0.186	113209890211067
ABI2-3	ABI2	x	TGCCTATCTGATAAACACCT	244	255	178	258	223	195	226	23541084391474	-0.00213	-0.00982641243493745	0.992	0.998	235346741396548	-0.00391	0.00178	0.998524685852875
ABI2-4	ABI2	x	TTACCTGGAAAGACACTGGG	140	266	141	147	208	212	186	226951294421792	0.0518	0.185257504962082	0.853	0.983	226086607161377	-0.00636	0.0582	103655739369193
ABI3-1	ABI3	x	CCTGTCTCGAAAGAGCATCA	315	391	398	399	443	303	375	257403126772772	0.0526	0.290309869929343	0.772	0.973	256584781867352	0.00426	0.0483	103713234255481
ABI3-2	ABI3	x	CGGGCACACTCTGCGCATGT	639	563	731	618	575	586	619	279169064902012	-0.12	-0.897302075609252	0.37	0.886	280911059930889	0.0129	-0.133	0.920187650624875
ABI3-3	ABI3	x	GCGATGACCTTCTGGCCGGG	378	242	289	325	324	272	305	248429983934679	0.0189	0.0957537336565651	0.924	0.992	24814426285023	0.000743	0.0182	101318666897679
ABI3-4	ABI3	x	TCAGGCCACAGACAAGCGGA	335	195	442	376	315	332	332	252113808370404	0.0738	0.313125536206861	0.754	0.971	251054501020661	0.00215	0.0716	105248523916036
ABI3BP-1	ABI3BP	x	GAGATATCAGATTCCTACAC	130	111	139	59	92	80	102	200860017176192	-0.718	-239347668537318	0.0167	0.445	210266234189715	-0.0195	-0.698	0.607939641591549
ABI3BP-2	ABI3BP	x	GGGATAGATGTAGTTTGCTG	49	79	109	150	58	42	81	190848501887865	0.077	0.169078891456694	0.866	0.984	189762709129044	-0.0263	0.103	105482231706806
ABI3BP-3	ABI3BP	x	TCCTCATAAACCATACCCTG	142	117	108	70	83	126	108	203342375548695	-0.396	-127748998353697	0.201	0.805	208754480953243	-0.0177	-0.378	0.759962428200758
ABI3BP-4	ABI3BP	x	TCTAATGCACTAGACGTAGT	130	141	107	209	133	139	143	215533603746506	0.348	128795204525641	0.198	0.801	210037054511756	-0.0101	0.358	127279493527594
ABL1-1	ABL1	x	CTTAGGCTATAATCACAATG	289	251	288	241	256	279	267	242651126136458	-0.0936	-0.517980494253513	0.604	0.947	244090908206522	-0.00141	-0.0922	0.937181252671215
ABL1-2	ABL1	x	GGTTCATCATCATTCAACGG	285	289	214	219	248	305	260	241497334797082	-0.0296	-0.143594209134403	0.886	0.987	241940496276989	-0.00184	-0.0278	0.979691888202783
ABL1-3	ABL1	x	TCAGTGATGATATAGAACGG	218	248	309	236	248	274	256	240823996531185	-0.032	-0.161340991199568	0.872	0.985	241218044778665	-0.00208	-0.0299	0.978063473447339
ABL1-4	ABL1	x	TTGCTCCCTCGAAAAGAGCG	378	442	291	256	470	419	376	257518784492766	0.0435	0.198857609793593	0.842	0.982	25685928042212	0.00431	0.0392	103061107431241
ABL2-1	ABL2	x	AACCTCTGTAATGACGACGG	174	215	256	206	214	216	214	233041377334919	-0.0203	-0.0952798211344884	0.924	0.992	233243845991561	-0.00456	-0.0157	0.986027644489064
ABL2-2	ABL2	x	GGTTCAACATCACAACCATA	322	268	229	274	271	259	270	243136376415899	-0.0267	-0.140251270417693	0.888	0.987	243616264704076	-0.00123	-0.0255	0.981663173749357
ABL2-3	ABL2	x	TATCGAATGGAACAGCCTGA	123	148	170	185	77	120	137	213672056715641	-0.207	-0.660827497672096	0.509	0.925	216731733474818	-0.0112	-0.196	0.866336856400087
ABL2-4	ABL2	x	TGTACACCATCACTCCACAG	127	178	107	101	78	125	119	207554696139253	-0.439	-145258938936229	0.146	0.759	213777596131347	-0.0149	-0.424	0.73764572854142
ABLIM1-1	ABLIM1	x	TAAGCAATCTACGAAGACCG	148	195	140	122	131	240	163	221218760440396	0.0296	0.102277871032129	0.919	0.991	220682587603185	-0.00774	0.0373	102072908027693
ABLIM1-2	ABLIM1	x	TCTAACTCCAACTTACGCTC	290	261	160	229	130	188	210	232221929473392	-0.378	-141816320285416	0.156	0.767	23747483460101	-0.00478	-0.373	0.769503610080431
ABLIM1-3	ABLIM1	x	TCTTTCGGACTGGACGACAT	148	138	126	83	171	174	140	214612803567824	0.055	0.184419277320852	0.854	0.983	213777596131347	-0.0106	0.0656	103885910329766
ABLIM1-4	ABLIM1	x	TGTTACATACACGCCCACGT	134	111	87	180	126	117	126	210037054511756	0.349	121048814735221	0.226	0.819	204401682898437	-0.0133	0.362	12736774753265
ABLIM2-1	ABLIM2	x	AGGTCGGAGTGTAGCGCCCG	176	299	165	138	109	236	187	22718416065365	-0.406	-133430350311266	0.182	0.789	232905871926422	-0.00629	-0.4	0.75471298426028
ABLIM2-2	ABLIM2	x	CTTACATAAATCACACGGCT	215	241	205	191	182	217	208	231806333496276	-0.164	-0.804867968283045	0.421	0.902	234308020476598	-0.0049	-0.159	0.892546971472977
ABLIM2-3	ABLIM2	x	GCTGTGAGAAATACATCACG	78	108	99	74	126	67	92	196378782734556	-0.0941	-0.277559694673911	0.781	0.975	197772360528885	-0.0227	-0.0714	0.936856506677177
ABLIM2-4	ABLIM2	x	GTGAGTAGGAGATCATGTCG	165	165	139	135	152	151	151	217897694729317	-0.0987	-0.420460757631196	0.674	0.958	219405158799542	-0.00895	-0.0898	0.933874118389642
ABLIM3-1	ABLIM3	x	AGGTCACCTTGTCTCCAATG	727	780	641	708	640	739	706	28488047010518	-0.0416	-0.333052364544625	0.739	0.968	285491302230786	0.0152	-0.0568	0.97157683649929
ABLIM3-2	ABLIM3	x	CAAGGTTAAGTCTATCTACG	385	296	356	259	317	335	325	251188336097887	-0.187	-103589316355091	0.3	0.858	253865750166938	0.00179	-0.189	0.878430468238362
ABLIM3-3	ABLIM3	x	GGAAGTGGTTGTTGTGCACG	712	615	577	719	677	739	673	282801506422398	0.165	131481793116201	0.189	0.794	280254568932879	0.0143	0.151	112116607802851
ABLIM3-4	ABLIM3	x	TGGGGGAGTCTATGTACCCC	306	298	471	328	351	295	342	253402610605613	-0.142	-0.717623003046889	0.473	0.917	255428720953196	0.00266	-0.145	0.906261938267334
ABO-1	ABO	x	AGCCAAAGGTGCTGACACCG	205	267	244	210	272	199	233	236735592102602	-0.0723	-0.344382234858307	0.731	0.967	237779176758819	-0.0035	-0.0688	0.951120475823925
ABO-2	ABO	x	ATGGAGTTCCGCGACCACGT	430	412	410	567	357	485	444	264738297011462	0.17	0.987215820992589	0.324	0.868	262048307415475	0.00717	0.163	112505848468881
ABO-3	ABO	x	CCGGTCCCCAGCGTCACGCG	61	136	71	123	83	96	95	197772360528885	0.172	0.482127074069707	0.63	0.951	195101353930913	-0.0217	0.194	112661922849728
ABO-4	ABO	x	TGATCAGTGACTTCTGCGAG	240	259	258	233	268	226	247	239269695325967	-0.0583	-0.313622967272142	0.754	0.971	240197462478041	-0.00264	-0.0557	0.960395134633986
ABR-1	ABR	x	CAAGAGTGAAATCCAGAAGG	166	187	225	226	156	167	188	227415784926368	-0.0743	-0.315176025905178	0.753	0.971	228480658370087	-0.00622	-0.0681	0.949802856386761
ABR-2	ABR	x	CTGCAGTGACAACGCCCAAG	1	6	2	1	4	2	3	0.477121254719662	-0.363	-0.213773080706945	0.831	NA	0.477121254719662	-0.0617	-0.301	0.777546035882558
ABR-3	ABR	x	GAGGCTTGACACTCACGTGT	65	82	105	99	80	91	87	193951925261862	0.0995	0.309156376445229	0.757	0.972	192427928606188	-0.0244	0.124	107140207851908
ABR-4	ABR	x	TACTGTCCTCGGACTACGAG	189	177	173	256	165	241	200	230102999566398	0.297	130513943583174	0.192	0.797	225446751046708	-0.00537	0.302	122858698044565
ABRA-1	ABRA	x	CCTCAGCCACAGGTACGAGA	279	313	303	348	289	287	303	24814426285023	0.046	0.265141844726773	0.791	0.976	247470178059625	0.000638	0.0454	103239853548324
ABRA-2	ABRA	x	CCTGGTGTCTGAGCTAACCA	493	323	438	626	564	343	464	266651798055488	0.29	138657619603534	0.166	0.776	262117628177504	0.00792	0.282	122264027769207
ABRA-3	ABRA	x	GAAAGAGGTGTCCAAAACGG	249	316	235	330	249	224	267	242651126136458	0.0054	0.0258206622799118	0.979	0.998	242596873227228	-0.00141	0.00681	100375000852805
ABRA-4	ABRA	x	GAATGCATTCACTTACTGGG	235	293	257	313	261	351	285	245484486000851	0.237	125383037475309	0.21	0.809	241774840202559	-0.00035	0.237	117853940781168
ABRACL-1	ABRACL	x	AAAGTTAAGCGTGAAATTTG	315	241	325	342	292	204	286	245636603312904	-0.0722	-0.334476556704635	0.738	0.968	246785465369239	-0.000293	-0.0719	0.951186404756441
ABRACL-2	ABRACL	x	AGCAATGAATGTGGATCACG	265	208	257	263	244	274	252	240140054078154	0.0974	0.512260107478291	0.608	0.947	238620160540079	-0.00233	0.0997	106984367041779
ABRACL-3	ABRACL	x	CGAGGTTAACCTCTTAGTGG	132	159	170	148	83	127	136	213353890837022	-0.365	-130663171202121	0.191	0.797	218657967066999	-0.0114	-0.354	0.77646887500104
ABRACL-4	ABRACL	x	GGTTGGCACATTTATCATCA	303	393	331	478	383	291	363	255990662503611	0.166	0.847822226131503	0.397	0.894	253444918887762	0.00369	0.162	112194348053048
ABT1-1	ABT1	x	AAAAAAGCGGTCCTACACCA	120	130	147	98	148	179	137	213672056715641	0.0983	0.35194533953144	0.725	0.967	212166925204345	-0.0112	0.11	107051128184639
ABT1-2	ABT1	x	AGAACAGACACTAGATGCGG	102	88	70	155	46	86	91	195904139232109	0.143	0.357320711923872	0.721	0.966	193785209325116	-0.023	0.166	110419884716309
ABT1-3	ABT1	x	GACGCGTCCGACCTCGCCAT	26	79	58	56	39	26	47	167209785793572	-0.43	-0.860609227729982	0.389	0.892	17350663496843	-0.0378	-0.392	0.742261785314525
ABT1-4	ABT1	x	GTTCCAAAGATCATAACGGA	36	58	47	15	25	64	41	161278385671974	-0.439	-0.798343754420963	0.425	0.902	167209785793572	-0.0407	-0.398	0.73764572854142
ABTB1-1	ABTB1	x	CGCACTTACTCGGAGCTCGG	75	97	55	80	56	79	74	186923171973098	-0.0784	-0.217551421608103	0.828	0.98	187890460247346	-0.0282	-0.0502	0.947107440251894
ABTB1-2	ABTB1	x	CTACAAAGACCACGTCACTG	206	231	105	201	399	116	210	232221929473392	0.402	0.680841891195147	0.496	0.922	225687803181872	-0.00478	0.407	132133840565827
ABTB1-3	ABTB1	x	GGGCTCGGAAGTAGTCACTG	36	35	30	27	32	55	36	155630250076729	0.175	0.35193378492277	0.725	0.967	152720011906298	-0.0435	0.218	112896440480613
ABTB1-4	ABTB1	x	TGTAATCGCGTAGAGCCCGG	68	63	46	106	175	52	85	192941892571429	0.912	221768263300019	0.0266	0.514	177085201164214	-0.025	0.937	188165221502758
ABTB2-1	ABTB2	x	AGGGGCTGAAGTATGCGGGG	391	424	456	349	443	439	417	262013605497376	-0.0461	-0.29281594419817	0.77	0.973	262702429583435	0.00609	-0.0522	0.968551052056761
ABTB2-2	ABTB2	x	CCTCATCAACCAAGCCATCG	551	471	549	570	410	469	503	270156798505593	-0.117	-0.75258646663752	0.452	0.91	271905493032031	0.00931	-0.126	0.922103117912631
ABTB2-3	ABTB2	x	GAGGGCTCGGCAGTGAACGG	215	161	111	147	171	171	163	221218760440396	0.00591	0.0221062488547658	0.982	0.998	221040770649497	-0.00774	0.0136	100410490196175
ABTB2-4	ABTB2	x	TGTTCAAGGTCATTCTCGGG	362	321	295	373	391	405	358	255388302664387	0.257	161165023705583	0.107	0.714	251321760006794	0.00345	0.254	119499120485678
ACAA1-1	ACAA1	x	AGCGCGAAGTAATATTTCCA	60	98	98	79	96	75	84	192427928606188	-0.0342	-0.102610143062697	0.918	0.991	193111871059219	-0.0253	-0.0089	0.976573137794429
ACAA1-2	ACAA1	x	CTGCCGAGAGAAGCTCGTCG	322	313	263	301	240	318	293	246686762035411	-0.0641	-0.344300502052431	0.731	0.967	247615508194764	9.9e-05	-0.0642	0.956541853365079
ACAA1-3	ACAA1	x	GCCCTTGTCATCATGGACCG	200	103	153	179	138	103	146	216435285578444	-0.119	-0.395930102363821	0.692	0.961	218184358794477	-0.00967	-0.109	0.92082569720504
ACAA1-4	ACAA1	x	TCAATAGACAGTGTTCGTCG	284	219	113	201	187	153	193	228555730900777	-0.187	-0.648116205412044	0.517	0.927	231245945744476	-0.00584	-0.181	0.878430468238362
ACAA2-1	ACAA2	x	TACCTGACATCCATTCACAA	132	122	108	105	149	65	114	205690485133647	-0.182	-0.56689766765452	0.571	0.941	20815873158135	-0.0161	-0.166	0.88148015790717
ACAA2-2	ACAA2	x	TAGCAGTGAAGTCTTTCAGA	137	152	186	115	138	158	148	217026171539496	-0.209	-0.826609807343173	0.408	0.898	21995723549052	-0.00938	-0.2	0.865136690584988
ACAA2-3	ACAA2	x	TGTTACTGCAGGGAATGCAT	1	1	2	1	3	2	2	0.301029995663981	0.585	0.288503876388233	0.773	NA	0.1249387366083	-0.0515	0.636	150003898928582
ACAA2-4	ACAA2	x	TTTCTGTAACTGTTCCAGGG	146	239	132	189	174	153	172	223552844690755	-0.00279	-0.010590089073512	0.992	0.998	223636928837428	-0.00718	0.00439	0.998067988108555
ACACA-1	ACACA	x	AATGCATGCGGTCTATCCGT	214	141	219	221	170	249	202	230535136944662	0.157	0.649902066199816	0.516	0.927	228179063767831	-0.00525	0.162	11149662187277
ACACA-2	ACACA	x	CCAGAGTCCCACATTCCCTG	117	119	101	83	73	110	100	2	-0.341	-114630796166027	0.252	0.832	205050864615168	-0.0201	-0.321	0.789493886700555
ACACA-3	ACACA	x	TATTTGCCTAGGTACCGAAG	235	152	184	152	184	215	187	22718416065365	-0.0514	-0.21280212076376	0.831	0.98	227951485352619	-0.00629	-0.0451	0.964999433122854
ACACA-4	ACACA	x	TGATGGGTCCATGATAACCG	90	111	73	98	75	106	92	196378782734556	0.0261	0.0824258154062339	0.934	0.993	196062930810073	-0.0227	0.0488	101825577743068
ACACB-1	ACACB	x	AAAGCGTGTGACAAACTCAG	187	221	221	254	135	169	198	229666519026153	-0.173	-0.68985683952884	0.49	0.92	232152939072561	-0.0055	-0.167	0.88699630515215
ACACB-2	ACACB	x	ACAACGACATCGACACCGGG	491	403	399	530	448	481	459	266181268553726	0.174	115738336417857	0.247	0.83	263447727016073	0.00774	0.166	112818213745651
ACACB-3	ACACB	x	GAACTCGAATATGGCCAGCG	105	156	75	91	117	165	118	207188200730613	0.151	0.454460842406955	0.649	0.956	204921802267018	-0.0151	0.166	111033883362864
ACACB-4	ACACB	x	GTCGGAGTCCATAATCCACA	134	204	105	112	121	214	148	217026171539496	0.013	0.0409694146442574	0.967	0.996	216928247150341	-0.00938	0.0224	100905163384468
ACAD10-1	ACAD10	x	AGCTCGATACTGCTTAACCC	149	148	109	151	162	117	139	214301480025409	0.0829	0.316150158842437	0.752	0.971	213140477885753	-0.0108	0.0937	105914491780811
ACAD10-2	ACAD10	x	ATCGCTTGTAGACTCCCTGT	173	152	205	113	127	201	162	220951501454263	-0.265	-0.983854198381082	0.325	0.868	224715461488113	-0.00781	-0.257	0.832198734711525
ACAD10-3	ACAD10	x	CCAGCTCATACCTCAAGGGG	93	85	105	118	112	190	117	206818586174616	0.57	191145225280875	0.0559	0.623	197466518080463	-0.0154	0.585	148452357062905
ACAD10-4	ACAD10	x	TCCAACTTACTACATCAGGC	301	171	170	206	124	152	187	22718416065365	-0.414	-148692347894445	0.137	0.749	233041377334919	-0.00629	-0.408	0.750539548757186
ACAD11-1	ACAD11	x	CCACTCCGATAGCTGTTGCA	275	222	361	317	322	255	292	246538285144842	0.0593	0.285984929879291	0.775	0.974	245636603312904	4.38e-05	0.0593	104196007598888
ACAD11-2	ACAD11	x	CCTTGGCCAAAAGTAGAACA	257	214	235	162	220	253	224	235024801833416	-0.153	-0.699966656357229	0.484	0.919	237168344633214	-0.00402	-0.149	0.899378312147752
ACAD11-3	ACAD11	x	CTGAGCCAATGTTTCTACCG	98	76	98	216	114	132	122	208635983067475	0.764	2495464307717	0.0126	0.412	195744764931454	-0.0142	0.778	169819249289368
ACAD11-4	ACAD11	x	TTGTTTGTACAGACTCGGAA	126	167	178	161	165	153	158	219865708695442	0.0243	0.101822202436665	0.919	0.991	219589965240923	-0.00815	0.0324	101698612762596
ACAD8-1	ACAD8	x	CAAGGCTTCAAAAATGACAG	486	418	428	428	497	458	452	265513843481138	0.0542	0.373722158283281	0.709	0.964	264738297011462	0.00747	0.0467	103828319718074
ACAD8-2	ACAD8	x	GCTTCGGAAATGAGGAACAG	576	439	639	521	606	503	547	273798732633343	-0.0211	-0.133826225647756	0.894	0.988	274141425049687	0.0107	-0.0318	0.985481026232447
ACAD8-3	ACAD8	x	TCAGTCCTCTCACGGCAATG	622	499	408	610	568	574	547	273798732633343	0.196	125062355276849	0.211	0.81	270728623069266	0.0107	0.185	114551789797976
ACAD8-4	ACAD8	x	TCGAAGATCACAGCTCGTGT	345	449	511	257	484	467	419	26222140229663	-0.111	-0.511097652999892	0.609	0.948	263848925695464	0.00617	-0.117	0.925946022527324
ACAD9-1	ACAD9	x	CACCATGTACTCAAGACTAG	234	349	279	298	304	331	299	247567118832443	0.114	0.601323138887053	0.548	0.936	245838601110505	0.000425	0.114	108222464452571
ACAD9-2	ACAD9	x	CTTGCCTAAACTGGCGTCCG	260	192	220	191	217	170	208	231806333496276	-0.217	-100998677150293	0.313	0.863	235024801833416	-0.0049	-0.212	0.86035263061144
ACAD9-3	ACAD9	x	GAAGATAAATTAGGCATTCG	177	233	196	152	216	154	188	227415784926368	-0.215	-0.919345349174953	0.358	0.883	230535136944662	-0.00622	-0.209	0.861546159712017
ACAD9-4	ACAD9	x	GGACTCCCGAAAAATTGACC	152	149	111	151	206	196	161	220682587603185	0.425	171921258240075	0.0856	0.68	213777596131347	-0.00789	0.433	134257250278026
ACADL-1	ACADL	x	CAGAAAAAGGCTAATACCAT	115	120	218	160	156	210	163	221218760440396	0.216	0.760381436697631	0.447	0.909	217897694729317	-0.00774	0.224	116150873192572
ACADL-2	ACADL	x	CTCCTCCCAGACAATAGCTG	318	297	277	330	321	193	289	246089784275655	-0.0798	-0.374062628998519	0.708	0.964	247324359965646	-0.000123	-0.0797	0.946188807254836
ACADL-3	ACADL	x	GCCACTTACTCTGAGTGATG	194	102	250	231	126	154	176	224551266781415	-0.0956	-0.304433025481324	0.761	0.972	226007138798507	-0.00696	-0.0886	0.935882943712409
ACADL-4	ACADL	x	TAAAATGGGATTAAAAGCCC	111	95	94	72	119	127	103	201283722470517	0.0841	0.271231160479531	0.786	0.975	2	-0.0192	0.103	106002625627196
ACADM-1	ACADM	x	AAGATGTGGATAACCAACGG	143	111	146	118	118	137	129	211058971029925	-0.101	-0.388805212001536	0.697	0.963	21249387366083	-0.0127	-0.0883	0.932386486436833
ACADM-2	ACADM	x	AATTGGCTTATGGATGTACA	324	374	366	278	311	360	336	252633927738984	-0.165	-0.967039397065748	0.334	0.872	254982037323937	0.00235	-0.167	0.891928519420093
ACADM-3	ACADM	x	ATTGTGGAAGCAGATACCCC	148	103	152	128	102	61	116	206445798922692	-0.47	-146478187397008	0.143	0.754	212818379142145	-0.0156	-0.454	0.721964597761248
ACADM-4	ACADM	x	GTATTTGGGGAGAATGACTG	164	163	235	126	151	211	175	224303804868629	-0.204	-0.778520491238018	0.436	0.906	22726150608494	-0.00701	-0.197	0.868140227601043
ACADS-1	ACADS	x	ACACACCATCTACCAGTCTG	824	681	777	899	787	955	820	291381385238372	0.211	172987770433331	0.0837	0.675	288119438536253	0.0178	0.193	115749021699012
ACADS-2	ACADS	x	GACACTCATGATGACTCCGG	296	241	327	305	323	330	304	248287358360875	0.149	0.832894591052869	0.405	0.897	245939248775923	0.00069	0.148	110880064360307
ACADS-3	ACADS	x	GGCAGGTACCTGGTTCGCTG	250	171	221	288	214	269	236	237291200297011	0.264	122721844478733	0.22	0.816	233041377334919	-0.00332	0.267	120080342748521
ACADS-4	ACADS	x	TAAGGAACATCTCTTCCCAG	271	293	230	176	285	243	250	239794000867204	-0.174	-0.80145048487402	0.423	0.902	242269924770743	-0.00245	-0.172	0.886381699194867
ACADSB-1	ACADSB	x	AGCCAAAGTTGATGCATCTG	267	241	178	216	200	206	218	23384564936046	-0.141	-0.659023411411527	0.51	0.926	235920286098709	-0.00434	-0.137	0.906890328933143
ACADSB-2	ACADSB	x	ATGGAGAAATCAGTAATACA	143	188	172	140	173	213	172	223552844690755	0.0645	0.26505080213218	0.791	0.976	222444673033626	-0.00718	0.0717	104572245719628
ACADSB-3	ACADSB	x	ATTGAGTAGAGCTTCTGACT	168	92	109	47	109	146	112	204921802267018	-0.289	-0.762871049265485	0.446	0.909	20899051114394	-0.0166	-0.272	0.818469181590804
ACADSB-4	ACADSB	x	TTCGAATGTTAACGGGCAGG	154	167	165	118	134	143	147	216731733474818	-0.299	-126369218725103	0.206	0.807	220951501454263	-0.00952	-0.289	0.81281560198432
ACADVL-1	ACADVL	x	CACTAATCGTACCCAGTTTG	169	205	311	177	293	218	229	235983548233989	0.0063	0.024468449178045	0.98	0.998	235856931677276	-0.00374	0.01	100437637572139
ACADVL-2	ACADVL	x	GTCTAACCGAGCCCTCAAGC	32	31	54	61	47	40	44	164345267648619	0.339	0.74888986840529	0.454	0.911	15910646070265	-0.0392	0.378	126487954235394
ACADVL-3	ACADVL	x	GTGGAGGAGACCACTTGGCA	96	87	120	60	83	130	96	198227123303957	-0.15	-0.439659439609236	0.66	0.957	200432137378264	-0.0214	-0.129	0.90125046261083
ACADVL-4	ACADVL	x	TCCTGGTCAGAGCGTCAGAG	144	126	95	103	105	138	118	207188200730613	-0.0771	-0.271039580633838	0.786	0.975	208517160973681	-0.0151	-0.062	0.947961255184207
ACAN-1	ACAN	x	CAGCGGTCACCTGCACGACG	117	120	148	182	106	78	125	209691001300806	-0.073	-0.227823834217457	0.82	0.979	210833947478884	-0.0136	-0.0594	0.950659101229818
ACAN-2	ACAN	x	CCTGCGCTCCAATGACTCTG	113	121	121	106	133	113	118	207188200730613	-0.0122	-0.0463994610329978	0.963	0.996	207310709833543	-0.0151	0.0029	0.991579259136154
ACAN-3	ACAN	x	GAACCAGCCTATACCCCAGT	184	126	179	109	117	125	140	214612803567824	-0.478	-185280291020768	0.0639	0.641	221218760440396	-0.0106	-0.467	0.717972255311718
ACAN-4	ACAN	x	GAGGGCAGTTCACCAACCGT	212	225	211	214	161	302	221	234439227368511	0.0632	0.266047265614324	0.79	0.976	233445375115093	-0.00418	0.0674	104478059016941
ACAP1-1	ACAP1	x	AGGTCTGCGGGGTTTCCGAG	401	288	356	415	369	234	344	253655844257153	-0.0378	-0.177252007938869	0.859	0.984	254199503572741	0.00276	-0.0406	0.974139303565458
ACAP1-2	ACAP1	x	CAGAACCAAGCTTAAGAGAG	157	185	144	119	143	149	150	217609125905568	-0.242	-0.994008601289829	0.32	0.865	220951501454263	-0.00909	-0.233	0.845572287377517
ACAP1-3	ACAP1	x	GTCACAAATGCCGACAACGA	166	145	84	122	211	186	152	218184358794477	0.394	131461035791237	0.189	0.794	21194758409068	-0.00882	0.403	131403162714937
ACAP1-4	ACAP1	x	TGCCGGAACACTGAATGCAG	216	276	233	288	243	204	243	238560627359831	0.0198	0.095884287949206	0.924	0.992	238321675185133	-0.00289	0.0227	101381892490185
ACAP2-1	ACAP2	x	ACTATAGGATAATCCGACTG	331	273	233	259	267	324	281	244870631990508	0.0222	0.113604510898266	0.91	0.99	24456042032736	-0.00058	0.0228	101550687025661
ACAP2-2	ACAP2	x	ATATATCAGAGCAAAATATG	250	218	233	256	213	217	231	236361197989214	-0.0312	-0.160448754843407	0.873	0.985	2368596763247	-0.00362	-0.0276	0.978605977398695
ACAP2-3	ACAP2	x	TCCGGAGCACTCGATACACA	261	248	284	240	318	182	256	240823996531185	-0.0998	-0.456131445122684	0.648	0.956	242215193259794	-0.00208	-0.0977	0.933162346340283
ACAP2-4	ACAP2	x	TGAACTTGGACCCTACATGA	347	332	240	345	223	241	288	245939248775923	-0.184	-0.849929603928681	0.395	0.894	248619425666645	-0.00018	-0.184	0.880259013563151
ACAP3-1	ACAP3	x	CCTCGCTATAGCAACTGTCA	491	489	436	526	558	388	481	268214507637383	0.056	0.34843998006381	0.728	0.967	267394199863409	0.00854	0.0475	103957943517528
ACAP3-2	ACAP3	x	CTCCACTTTGGACTCATCGT	321	264	319	196	180	190	245	238916608436453	-0.676	-35505969734468	0.000384	0.0943	24790471757557	-0.00277	-0.673	0.625898229326997
ACAP3-3	ACAP3	x	CTGGATCAAGGACAAATACG	544	400	395	372	371	373	409	261172330800734	-0.263	-158506751662713	0.113	0.723	264965932229235	0.00576	-0.269	0.833353207159218
ACAP3-4	ACAP3	x	GTTCGCTGACAGCCTACAGG	339	340	296	320	317	292	317	250105926221775	-0.0697	-0.420787607376894	0.674	0.958	251188336097887	0.00137	-0.0711	0.952836114144498
ACAT1-1	ACAT1	x	CTGCCTAAAAAAGATCCAAT	132	105	78	149	105	112	114	205690485133647	0.216	0.7206412299046	0.471	0.916	202118929906994	-0.0161	0.232	116150873192572
ACAT1-2	ACAT1	x	GAAGTGAAAGAAGCATACAT	102	68	67	63	95	122	86	193449845124357	0.241	0.682138647517732	0.495	0.921	189762709129044	-0.0247	0.266	118181154693437
ACAT1-3	ACAT1	x	GAGGATCAACACCATATGGT	1	1	2	2	1	2	2	0.301029995663981	0.322	0.152727368451519	0.879	NA	0.1249387366083	-0.0515	0.374	125006230258521
ACAT1-4	ACAT1	x	TTCTGCGCAGGATGTGATGG	321	316	291	368	375	330	334	252374646681156	0.209	129772523959147	0.194	0.799	24904267214992	0.00225	0.207	11558867065548
ACAT2-1	ACAT2	x	CCTGTTAGACAAGCCAGTGT	151	127	205	130	150	155	153	21846914308176	-0.151	-0.588144614743073	0.556	0.938	220682587603185	-0.00869	-0.142	0.900625979847929
ACAT2-2	ACAT2	x	GCAGTCCAGTCAATAGGGAT	181	214	244	356	251	273	253	240312052117582	0.462	221107155963175	0.027	0.517	232837960343874	-0.00227	0.464	137745004638314
ACAT2-3	ACAT2	x	GTTCTCAAGTAAGCCAAGTG	120	111	66	138	160	177	129	211058971029925	0.677	234678061825493	0.0189	0.464	199563519459755	-0.0127	0.69	159881166070494
ACAT2-4	ACAT2	x	TCTATGTTGCTCCCATGGCG	162	212	116	127	111	143	145	216136800223497	-0.363	-131469634268262	0.189	0.794	221307482530885	-0.00983	-0.353	0.777546035882558
ACBD3-1	ACBD3	x	AAGAGAACGTCTGCAAAAGG	423	439	632	516	502	563	512	270926996097583	0.0817	0.493665097096465	0.622	0.95	269722934275972	0.00961	0.0721	105826431211619
ACBD3-2	ACBD3	x	ACATCAAAGAATCCAACCTC	252	257	256	257	246	317	264	242160392686983	0.1	0.538817313695778	0.59	0.944	240654018043396	-0.00159	0.102	107177346253629
ACBD3-3	ACBD3	x	GGGCCGCGACCGGATCCAGG	275	192	331	294	317	299	285	245484486000851	0.189	0.910388730938793	0.363	0.884	242488163663107	-0.00035	0.189	113997327269346
ACBD3-4	ACBD3	x	TGCGTCCCACAAAATAGAGA	188	168	203	197	145	216	186	226951294421792	-0.00258	-0.0111997472818411	0.991	0.998	227029055316676	-0.00636	0.00378	0.998213278365102
ACBD4-1	ACBD4	x	ACCACTTATATCGTCCAATG	312	364	273	201	337	285	295	246982201597816	-0.206	-0.972392730910274	0.331	0.871	250014495770763	0.000209	-0.206	0.866937563514687
ACBD4-2	ACBD4	x	AGGTGATCCCTGACATGCCG	383	519	495	552	513	496	493	269284691927723	0.16	105655674474134	0.291	0.854	266807515139452	0.00896	0.151	111728713807222
ACBD4-3	ACBD4	x	CAGGGAATCACAGAAAACCT	186	163	284	263	141	321	226	23541084391474	0.196	0.685000876087278	0.493	0.921	232428245529769	-0.00391	0.2	114551789797976
ACBD4-4	ACBD4	x	GTGATCGACACAGTGCCCCT	218	167	298	260	281	225	242	238381536598043	0.165	0.723369449218839	0.469	0.916	235729944896187	-0.00295	0.168	112116607802851
ACBD5-1	ACBD5	x	ACTGGGTGATATGACCAAAG	183	154	201	152	167	71	155	219033169817029	-0.464	-154264104590024	0.123	0.734	225366102094673	-0.00846	-0.456	0.724973416439426
ACBD5-2	ACBD5	x	AGCCCATTGATGAAAACTTG	508	355	449	427	391	283	402	260422605308447	-0.253	-133915252925796	0.181	0.788	264081258031998	0.00547	-0.258	0.839149637106542
ACBD5-3	ACBD5	x	AGGTAAAATAGTCCAACCTG	198	213	306	258	153	214	224	235024801833416	-0.198	-0.808010374460512	0.419	0.902	237839790094814	-0.00402	-0.194	0.871758239537062
ACBD5-4	ACBD5	x	TGGTCATTCCAGTCAACCCA	368	388	314	357	311	322	343	253529412004277	-0.112	-0.676656603262235	0.499	0.922	255226252296555	0.00271	-0.115	0.925304428037852
ACBD6-1	ACBD6	x	AAATATATTTGATTACTGCA	9	3	3	2	1	19	6	0.778151250383644	0.553	0.420034202169176	0.674	NA	0.698970004336019	-0.068	0.621	146713334416732
ACBD6-2	ACBD6	x	AGCCATCAAATCGAAAAATG	552	382	575	379	335	611	472	267394199863409	-0.188	-0.884751160786359	0.376	0.888	270156798505593	0.00821	-0.196	0.877821797609519
ACBD6-3	ACBD6	x	CCTCGATCTCAGGGCTATGG	502	555	407	447	517	616	507	270500795933334	0.11	0.672938061207195	0.501	0.923	268841982200271	0.00944	0.101	107922823650443
ACBD6-4	ACBD6	x	TTAAAAAACTAGATCCAGGT	249	338	363	234	234	330	291	246389298898591	-0.252	-12030835927192	0.229	0.821	250060235056919	-1.17e-05	-0.252	0.83973149294414
ACBD7-1	ACBD7	x	ACAGGGCTGCAGAAGATGTG	1	5	2	5	7	6	4	0.602059991327962	1.17	0.864361931231702	0.387	NA	0.425968732272281	-0.0659	1.24	225011696937762
ACBD7-2	ACBD7	x	CTGAAAGCAAGACCAGATGA	445	465	493	606	444	427	480	268124123737559	0.0742	0.461101166810745	0.645	0.955	26699364163087	0.0085	0.0657	105277709048811
ACBD7-3	ACBD7	x	GAGAACTGAAAGAACTCTAT	269	207	288	288	244	269	261	241664050733828	0.0682	0.348147418130355	0.728	0.967	240597210385603	-0.00177	0.07	104840780562609
ACBD7-4	ACBD7	x	GCAAAGCCAAATGGGAAGCA	278	413	290	376	379	302	340	253147891704225	0.108	0.558314160383855	0.577	0.941	251454775266029	0.00256	0.105	107773314504367
ACCS-1	ACCS	x	CCCAACAGACTTCTCAAACA	371	445	363	353	365	493	398	259988307207369	0.0386	0.221117148174563	0.825	0.98	259439255037543	0.00529	0.0333	102711662270036
ACCS-2	ACCS	x	GGGGAGTATACATCACCCAG	302	220	280	252	391	293	290	246239799789896	0.223	106793851254654	0.286	0.851	24270531135645	-6.75e-05	0.223	116715810181847
ACCS-3	ACCS	x	TAGGTGGTTGTCCTGAATGG	359	327	382	334	422	385	368	256584781867352	0.0954	0.585793902889323	0.558	0.938	255144999797288	0.00393	0.0915	106836157971456
ACCS-4	ACCS	x	TGTGATAGCGCCATAGTAAG	276	195	311	302	246	303	272	24345689040342	0.122	0.583404825528089	0.56	0.939	241608549834019	-0.00111	0.123	10882424416708
ACCSL-1	ACCSL	x	AAGTGACATGAACTGCATTG	545	587	567	528	644	693	594	277378644498119	0.134	0.981009144962545	0.327	0.869	275307212414938	0.0122	0.122	109733193757924
ACCSL-2	ACCSL	x	GATCAACCTCCTACAGTCTG	301	351	329	381	311	385	343	253529412004277	0.135	0.8037040230154	0.422	0.902	251454775266029	0.00271	0.132	109809281378705
ACCSL-3	ACCSL	x	TCCCACGGATGGATAGGTCG	221	221	160	253	282	208	224	235024801833416	0.304	139534043131839	0.163	0.773	230247523653816	-0.00402	0.308	123456260689354
ACCSL-4	ACCSL	x	TCTTAGGGGAAAAAGGTCCG	159	170	161	169	212	167	173	22380461031288	0.161	0.72147595142646	0.471	0.916	221307482530885	-0.00712	0.168	111806185096586
ACD-1	ACD	x	AAGCAGCGTGGCCCCGACGT	648	519	483	421	556	511	523	271850168886727	-0.149	-0.941625045140074	0.346	0.878	274036268949424	0.00998	-0.159	0.90187537838225
ACD-2	ACD	x	AGATGCACAGCATTGAGCTG	265	444	345	475	271	227	338	252891670027765	-0.115	-0.459515385940345	0.646	0.955	254571935615687	0.00246	-0.117	0.923382310729395
ACD-3	ACD	x	ATCCGCTGGGTGTAGCCGTG	719	610	713	649	690	610	665	28228216453031	-0.0672	-0.538181560595382	0.59	0.944	283293448303123	0.0141	-0.0813	0.954488684739413
ACD-4	ACD	x	GCTTCTGGATGAAATGCGGG	244	307	222	316	257	219	261	241664050733828	0.035	0.167667068939134	0.867	0.984	241105823919866	-0.00177	0.0368	10245568230328
ACE-1	ACE	x	GGAAAACATCTACGACATGG	262	254	276	270	315	229	268	242813479402879	0.0395	0.20879168334239	0.835	0.981	242160392686983	-0.00135	0.0408	102775757129386
ACE-2	ACE	x	GGTGTGGAACGAGTATGCCG	98	99	51	161	144	190	124	209342168516224	0.997	328703342294149	0.00101	0.149	191733042610655	-0.0138	1.01	19958454379981
ACE2-1	ACE2	x	AACATCTTCATGCCTATGTG	672	480	459	567	476	459	519	271516735784846	-0.101	-0.605754658225612	0.545	0.935	272997428569956	0.00984	-0.111	0.932386486436833
ACE2-2	ACE2	x	CAGGATCCTTATGTGCACAA	156	191	179	219	228	228	200	230102999566398	0.36	175380382959155	0.0795	0.672	224386448943408	-0.00537	0.365	12834258975629
ACE2-3	ACE2	x	CCAAAGGCGAGAGATAGTTG	364	368	251	291	366	202	307	248713837547719	-0.195	-0.858067321359577	0.391	0.892	251543226311247	0.000848	-0.196	0.873572895916694
ACE2-4	ACE2	x	TGCACAGAGAATATTCAAGG	235	194	256	216	311	205	236	237291200297011	0.0957	0.432662353790668	0.665	0.958	235856931677276	-0.00332	0.099	106858376235959
ACE-3	ACE	x	GTTGTAGAAGTCCCAAGCCG	75	96	118	82	95	130	99	199563519459755	0.0872	0.274630186207939	0.784	0.975	198377658803689	-0.0204	0.108	106230644323128
ACE-4	ACE	x	GTTTCGTTTCGGGTAACAGG	275	277	290	305	396	228	295	246982201597816	0.142	0.685218673037674	0.493	0.921	244819083677999	0.000209	0.142	110343374004196
ACER1-1	ACER1	x	CCCAGACAACGTAAATGTAG	245	151	261	225	279	204	228	235793484700045	0.108	0.452915467638157	0.651	0.956	234044411484012	-0.00379	0.112	107773314504367
ACER1-2	ACER1	x	GAAGACCAGGCGGATGAACT	99	153	123	155	113	158	134	212710479836481	0.184	0.669213898957105	0.503	0.923	209691001300806	-0.0117	0.196	113602926478669
ACER1-3	ACER1	x	GGTGGCCGAGTTCTACAACA	29	61	54	85	75	52	59	177085201164214	0.558	134634061186716	0.178	0.787	168124123737559	-0.0329	0.591	147222686216818
ACER1-4	ACER1	x	TGGACGAGATCGCCATCCTG	213	147	155	197	139	154	168	222530928172586	-0.0718	-0.286818166357667	0.774	0.974	223468597432153	-0.00741	-0.0644	0.951450166189707
ACER2-1	ACER2	x	ATACCTTCTGGGGAACCACA	224	182	193	251	100	199	192	228330122870355	-0.123	-0.429840229679573	0.667	0.958	230030556766965	-0.00592	-0.117	0.918276162300924
ACER2-2	ACER2	x	ATTCAGGGGTAGGTTCAAGG	158	143	190	212	157	210	178	225042000230889	0.238	101634041846939	0.309	0.862	221396023740331	-0.00685	0.245	117935659226122
ACER2-3	ACER2	x	CATCTGACCCAAGAAACTAA	366	367	414	401	327	436	385	25854607295085	0.0212	0.129317283881946	0.897	0.988	258244216318161	0.00472	0.0165	101480321842796
ACER2-4	ACER2	x	TATCGCCGAGTTCTACAACA	383	379	383	455	415	308	387	258771096501891	0.041	0.238434817296407	0.812	0.978	258168423195624	0.00481	0.0362	102882670789358
ACER3-1	ACER3	x	AAAAGAGCCGATATTCCATC	199	222	295	229	228	183	226	23541084391474	-0.162	-0.7424944971054	0.458	0.913	237779176758819	-0.00391	-0.158	0.893785162356787
ACER3-2	ACER3	x	CTCGGCGATGTACCAGGTCA	145	105	121	134	150	151	134	212710479836481	0.23	0.901257355516768	0.367	0.885	209225265489538	-0.0117	0.242	117283494923188
ACER3-3	ACER3	x	TAAGCCATGGATAAACCCTG	120	92	115	128	96	135	114	205690485133647	0.135	0.478166251850511	0.633	0.952	203742649794062	-0.0161	0.151	109809281378705
ACER3-4	ACER3	x	TATTAAACTGAATAGAACTA	98	178	98	92	87	88	107	202938377768521	-0.486	-153369256666476	0.125	0.736	209575034748082	-0.018	-0.468	0.714001989842532
ACHE-1	ACHE	x	GGTGTCCATGAACTACCGGG	72	46	106	89	67	99	80	190308998699194	0.187	0.501912515190788	0.616	0.949	18731267636145	-0.0266	0.214	113839402907488
ACHE-2	ACHE	x	TATGTGGACACCCTATACCC	83	60	65	97	103	71	80	190308998699194	0.382	114194980039321	0.253	0.833	18409420802431	-0.0266	0.409	130314714936329
ACHE-3	ACHE	x	TGGTGGGAATGACACAGAGC	178	100	161	150	88	155	139	214301480025409	-0.16	-0.52567734016062	0.599	0.945	216534326552246	-0.0108	-0.149	0.895025070927972
ACHE-4	ACHE	x	TGTCCTCGTCTGGATCTATG	132	125	206	97	164	134	143	215533603746506	-0.229	-0.788512960311461	0.43	0.904	218845973629829	-0.0101	-0.219	0.853226098112067
ACIN1-1	ACIN1	x	CCTGGTCAAGCGGCTCAAAG	276	235	275	252	246	222	251	239967372148104	-0.127	-0.67918567720565	0.497	0.922	241830129131975	-0.00239	-0.125	0.915733686418126
ACIN1-2	ACIN1	x	CGTACTCATGCCAACCCTCG	108	109	138	149	135	122	127	210380372095596	0.194	0.741912372278145	0.458	0.913	207310709833543	-0.0131	0.207	114393097320381
ACIN1-3	ACIN1	x	GAGGAATTAGCACTGGCCAA	439	400	406	425	543	482	449	265224634100332	0.22	147150455083539	0.141	0.753	261804809671209	0.00736	0.213	116473358646846
ACIN1-4	ACIN1	x	TGAGGGACAAAAATCTAGGG	144	204	180	249	246	175	200	230102999566398	0.344	147767791480899	0.139	0.752	224551266781415	-0.00537	0.349	12692708860198
ACKR1-1	ACKR1	x	AGCTAGGATACCCAGGACAC	120	116	109	123	54	61	97	198677173426624	-0.536	-153792273460177	0.124	0.735	206069784035361	-0.021	-0.515	0.68968046091353
ACKR1-2	ACKR1	x	CAATGGCAACAAGACAAAGA	179	213	255	260	240	303	242	238381536598043	0.312	150942508576956	0.131	0.743	233378302594904	-0.00295	0.315	124142749152611
ACKR1-3	ACKR1	x	CTGCACCCTGATATACAGCA	94	132	109	78	145	183	124	209342168516224	0.277	0.857842731071603	0.391	0.892	204792355231718	-0.0138	0.291	121167266043024
ACKR1-4	ACKR1	x	GAAGGAATCATTCACACCAT	108	108	129	99	142	108	116	206445798922692	0.0166	0.0597036095892241	0.952	0.995	206069784035361	-0.0156	0.0322	10115726946378
ACKR2-1	ACKR2	x	ATCTCAACCATCCGCCTGCG	652	794	491	604	594	722	643	280821097292422	-0.0127	-0.0779064643894972	0.938	0.993	281000836599945	0.0135	-0.0262	0.991235663496294
ACKR2-2	ACKR2	x	CAGCCCATACTATGGTAGCA	614	666	618	665	576	594	622	279379038469082	-0.0487	-0.391474923762018	0.695	0.962	280117495337161	0.013	-0.0617	0.966807118052086
ACKR2-3	ACKR2	x	CATGCCCGCCGAAATCTGCG	207	229	196	267	285	308	249	239619934709574	0.444	238103644637958	0.0173	0.45	232359582356272	-0.00252	0.447	136037085240596
ACKR2-4	ACKR2	x	GGAGTGGAAGGAGAAACCCT	157	105	142	173	138	186	150	217609125905568	0.299	11627731251257	0.245	0.83	212926011039094	-0.00909	0.308	123029134475114
ACKR3-1	ACKR3	x	AAGACAGCGATAATGGAGAA	356	383	580	371	336	467	416	261909333062674	-0.168	-0.846896150428092	0.397	0.894	26431235408267	0.00605	-0.174	0.890075733252496
ACKR3-2	ACKR3	x	CCAACAATGAGACCTACTGC	164	278	140	193	184	175	189	227646180417324	-0.0764	-0.290133843968611	0.772	0.973	228780172993023	-0.00615	-0.0702	0.948421320457631
ACKR3-3	ACKR3	x	GCACTGCTACATCTTGAACC	293	287	285	298	347	466	329	251719589794997	0.361	190452280146077	0.0568	0.625	245989485274515	0.002	0.359	128431580898943
ACKR3-4	ACKR3	x	GGTCCACGCTCATGCACGTG	429	348	296	400	463	489	404	260638136511061	0.333	193540433292491	0.0529	0.613	255347846724629	0.00555	0.327	12596299799474
ACKR4-1	ACKR4	x	AGTCCCCAGCCAATCAGGAG	711	613	510	612	530	727	617	279028516403324	0.0273	0.174920265044082	0.861	0.984	278627807661434	0.0128	0.0145	101910309111514
ACKR4-2	ACKR4	x	ATTGATGTTCCTAGGTAGCG	776	673	599	721	610	692	678	283122969386706	-0.0177	-0.132547483515001	0.895	0.988	283420869758413	0.0145	-0.0322	0.987806248624953
ACKR4-3	ACKR4	x	CAATGACGAAAACTATTGTG	485	568	414	411	570	484	489	268930885912362	-0.00197	-0.0118562996038108	0.991	0.998	268930885912362	0.00882	-0.0108	0.998635431925143
ACKR4-4	ACKR4	x	TGTGCTACTTTATCACAGCA	344	417	547	367	406	396	413	26159500516564	-0.162	-0.909578785446972	0.363	0.884	263948648926859	0.00593	-0.168	0.893785162356787
ACLY-1	ACLY	x	AGAGCAATTCGAGATTACCA	50	65	23	88	33	35	49	169019608002851	0.177	0.340583084812954	0.733	0.968	166275783168157	-0.0369	0.214	113053056712459
ACLY-2	ACLY	x	CGGTCACCTGTACACGACAG	65	37	39	17	71	34	44	164345267648619	-0.209	-0.389119380176824	0.697	0.963	167209785793572	-0.0392	-0.17	0.865136690584988
ACLY-3	ACLY	x	GACCAGCTGATCAAACGTCG	83	84	62	80	74	42	71	185125834871908	-0.224	-0.604312026423366	0.546	0.935	188271422762023	-0.0291	-0.195	0.856188284546457
ACLY-4	ACLY	x	GCCAGCGGGAGCACATCGGT	24	24	9	18	48	6	22	134242268082221	0.337	0.439518913883105	0.66	0.957	127875360095283	-0.0537	0.391	12631272618458
ACMSD-1	ACMSD	x	AGTGGTGCGAGAGAATTGCT	82	131	90	141	136	83	110	204139268515822	0.249	0.785521502555101	0.432	0.905	200432137378264	-0.0171	0.266	118838310505693
ACMSD-2	ACMSD	x	CCTCCTGGGGTAGCTCACAA	496	418	301	438	336	350	390	25910646070265	-0.112	-0.58041173959335	0.562	0.939	260745502321467	0.00494	-0.117	0.925304428037852
ACMSD-3	ACMSD	x	CGAGTGGGACCTGAACGCGC	154	215	197	178	197	130	178	225042000230889	-0.165	-0.67402683649774	0.5	0.923	227569517646861	-0.00685	-0.158	0.891928519420093
ACO1-1	ACO1	x	CCTGCCCCTAACATCACAGA	281	253	301	275	259	210	263	241995574848976	-0.166	-0.873977133458453	0.382	0.89	244456522076394	-0.00165	-0.164	0.891310495896971
ACO1-2	ACO1	x	CTTGGTGTCTAGGTTTGACG	145	156	128	105	178	113	138	213987908640124	-0.115	-0.416882137908016	0.677	0.959	215533603746506	-0.011	-0.104	0.923382310729395
ACO1-3	ACO1	x	TTATTACCCAGACAGCCTCG	255	255	189	188	169	143	200	230102999566398	-0.483	-216186321341159	0.0306	0.531	236735592102602	-0.00537	-0.478	0.715488260011456
ACO2-1	ACO2	x	ATCTTCTCCGAGAGTGTCAG	708	635	663	628	577	585	633	280140371001736	-0.164	-135654307545079	0.175	0.785	282520967396474	0.0133	-0.177	0.892546971472977
ACO2-2	ACO2	x	GTCTCAATAGGACATCAACC	184	86	171	92	138	192	144	215836249209525	-0.0635	-0.192531576356267	0.847	0.982	216731733474818	-0.00999	-0.0535	0.956939750673012
ACO2-3	ACO2	x	GTGCAGCTACCAATTAGACC	60	75	100	78	88	127	88	194448267215017	0.318	0.934894162774236	0.35	0.879	189394660755207	-0.024	0.342	12466011942751
ACO2-4	ACO2	x	TCTCGGGGTTTGCGTCGTTG	1	1	2	1	1	2	1	0	1.02e-06	4.60843e+07	1	NA	0.1249387366083	-0.0203	0.0203	100000070701037
ACOT1-1	ACOT1	x	ACAATGCCAGGAAAGGGCCC	448	323	465	479	401	324	407	260959440922522	-0.0378	-0.201380072539256	0.84	0.982	261489721603313	0.00568	-0.0435	0.974139303565458
ACOT11-1	ACOT11	x	AGCTGAAGCAGATCACGCCG	670	624	789	711	636	580	668	282477646247555	-0.112	-0.832235693019313	0.405	0.897	284156801522808	0.0142	-0.126	0.925304428037852
ACOT11-2	ACOT11	x	ATCTGCGTCCAGGACCACAA	491	715	469	528	487	554	541	273319726510657	-0.0943	-0.568081189449533	0.57	0.94	27468935566532	0.0106	-0.105	0.936726639789833
ACOT11-3	ACOT11	x	GCCAACTGCGCCATTCAGGG	299	381	344	440	387	359	368	256584781867352	0.212	127446840566465	0.202	0.806	253317870192015	0.00393	0.208	115829280619464
ACOT11-4	ACOT11	x	GGGATACCGGAACCCCACGG	230	205	188	196	275	232	221	234439227368511	0.174	0.827209874721544	0.408	0.898	231736679193951	-0.00418	0.178	112818213745651
ACOT1-2	ACOT1	x	AGCCCGAGAAACCCTTGGTG	150	135	128	160	270	202	174	22405492482826	0.614	246493045342959	0.0137	0.422	213882879693674	-0.00707	0.621	153049676982267
ACOT12-1	ACOT12	x	AGCATTCAGCACAAGCATGG	232	185	305	272	160	212	228	235793484700045	-0.165	-0.668106720949586	0.504	0.924	238141594284998	-0.00379	-0.161	0.891928519420093
ACOT12-2	ACOT12	x	CCACCCCATGCAAACCATCA	268	372	272	290	162	259	270	243136376415899	-0.359	-155059435228601	0.121	0.732	248287358360875	-0.00123	-0.358	0.779704842611323
ACOT12-3	ACOT12	x	GATGATTTCAGACGCTATCG	79	89	93	127	89	55	89	194939000664491	0.0542	0.154439092350652	0.877	0.986	193951925261862	-0.0237	0.0779	103828319718074
ACOT12-4	ACOT12	x	GTAGATATGTTTAAGTTCCG	96	147	108	43	97	113	101	200432137378264	-0.472	-130345983115548	0.192	0.797	206818586174616	-0.0198	-0.452	0.720964435730112
ACOT1-3	ACOT1	x	CTACTTGCTCAGTCATCCTG	330	410	387	327	214	309	330	251851393987789	-0.407	-210993841382756	0.0349	0.551	257480266132644	0.00205	-0.409	0.754190038343289
ACOT13-1	ACOT13	x	ACGTGGCTGTCAAACCGCCG	74	76	101	145	76	98	95	197772360528885	0.346	103840448267264	0.299	0.858	192255246676138	-0.0217	0.368	127103168930567
ACOT13-2	ACOT13	x	AGTAGATAACATATCAACAA	107	94	105	162	119	72	110	204139268515822	0.206	0.637889041684626	0.524	0.929	200860017176192	-0.0171	0.223	115348560506002
ACOT13-3	ACOT13	x	GGTGATAAAGGCCATGACCA	168	136	113	188	128	106	140	214612803567824	0.0172	0.0600810762999381	0.952	0.995	214301480025409	-0.0106	0.0278	101199348338902
ACOT13-4	ACOT13	x	GTTCATATCGACACTGACTC	192	197	229	199	172	188	196	229225607135648	-0.145	-0.692973459650729	0.488	0.92	231386722036915	-0.00563	-0.139	0.904379377561088
ACOT1-4	ACOT1	x	GGGGGAACCTTACGCTACAA	89	56	68	59	65	83	70	184509804001426	-0.0412	-0.11491766581403	0.909	0.989	185125834871908	-0.0293	-0.0119	0.971846252144469
ACOT2-1	ACOT2	x	AGATCATTAGGGTTCCTGCT	754	678	760	840	730	683	741	286981820797933	0.0396	0.322340840986136	0.747	0.97	286371929509267	0.016	0.0236	102782881248915
ACOT2-2	ACOT2	x	CTACTTGCTCAGTCATCCCG	436	463	527	515	535	528	501	269983772586725	0.146	106365745883504	0.287	0.852	267699827079618	0.00924	0.137	110649735309227
ACOT2-3	ACOT2	x	GCTCGCCAAGAGTGTCGGCG	408	411	403	420	426	425	416	261909333062674	0.0567	0.402279150451762	0.687	0.961	260994995118687	0.00605	0.0506	104008396465312
ACOT2-4	ACOT2	x	GGTACAGCCGGGACGCTCGA	294	411	384	461	441	445	406	260852603357719	0.307	187918573377697	0.0602	0.635	255990662503611	0.00563	0.301	123713247868717
ACOT4-1	ACOT4	x	ATAATAAGCTAGAGCCAACG	98	58	58	162	115	147	106	202530586526477	0.986	312350150992772	0.00179	0.194	185329251862953	-0.0183	1	198068574386605
ACOT4-2	ACOT4	x	ATGTCAATGATCCCTGGGAA	344	265	305	503	383	360	360	255630250076729	0.447	245623813044711	0.014	0.426	248382494101417	0.00355	0.443	136320260728251
ACOT4-3	ACOT4	x	CAGTTTCCATCAATGGATCT	253	539	404	402	328	316	374	257287160220048	-0.193	-0.859188310261492	0.39	0.892	260060992493273	0.00422	-0.197	0.874784764905822
ACOT4-4	ACOT4	x	TCGCGGGACTCGAGCCCATG	216	178	321	319	285	336	276	244090908206522	0.395	179100819247196	0.0733	0.662	237718478708142	-0.000872	0.396	131494276020507
ACOT6-1	ACOT6	x	ACAGGCATTGATAAGTACAG	491	492	371	427	359	380	420	26232492903979	-0.216	-131918988152667	0.187	0.793	265449740962946	0.00621	-0.222	0.860949188338904
ACOT6-2	ACOT6	x	ATCATATCCTTGTAATGTAG	431	506	647	566	649	570	562	274973631556906	0.172	109501191691582	0.274	0.845	272263392253381	0.0112	0.161	112661922849728
ACOT6-3	ACOT6	x	CTGAAAGGCTACAAGCTCAT	636	513	605	582	558	510	567	275358305889291	-0.0882	-0.6467090198104	0.518	0.927	276690833431036	0.0114	-0.0996	0.940695690361061
ACOT6-4	ACOT6	x	TTGGCATGGATGATCAAAGC	287	317	290	230	376	304	301	247856649559384	0.0256	0.128425502900191	0.898	0.988	247421626407626	0.000532	0.0251	101790293801601
ACOT7-1	ACOT7	x	AGCGCATGGAGACCAAGTGG	177	154	168	181	79	165	154	218752072083646	-0.232	-0.785376995580499	0.432	0.905	222097929090373	-0.00857	-0.223	0.851453707748945
ACOT7-2	ACOT7	x	CAGGGGCACATACCACAGGG	157	154	98	165	154	201	155	219033169817029	0.346	132517789677422	0.185	0.793	213460205328768	-0.00846	0.354	127103168930567
ACOT7-3	ACOT7	x	GCGGCCAGATGATGCCAACG	93	66	69	50	66	63	68	183250891270624	-0.349	-0.981295542283222	0.326	0.869	188081359228079	-0.0299	-0.319	0.785128118673572
ACOT7-4	ACOT7	x	GTCTCCCATGTGCATCGGTG	183	223	102	109	179	181	163	221218760440396	-0.115	-0.37962206483573	0.704	0.963	222874245756426	-0.00774	-0.107	0.923382310729395
ACOT8-1	ACOT8	x	ATTACTGGGTACCGGCCAAG	124	111	106	128	124	126	120	207918124604762	0.149	0.575489118858299	0.565	0.939	205563312427284	-0.0147	0.164	110880064360307
ACOT8-2	ACOT8	x	CCTTAAATACTGGTCAATGA	173	107	148	127	150	171	146	216435285578444	0.0659	0.248407577703638	0.804	0.977	215432251429351	-0.00967	0.0756	104673772512968
ACOT8-3	ACOT8	x	TCGTGACCAAGACGCTACGG	183	125	197	132	82	167	148	217026171539496	-0.406	-136791487320501	0.171	0.781	2226170123399	-0.00938	-0.397	0.75471298426028
ACOT8-4	ACOT8	x	TTACTGGCTTGATCTCAATG	168	200	242	188	200	197	199	229885307640971	-0.0604	-0.277833619193696	0.781	0.975	23082085802911	-0.00544	-0.055	0.958998191704475
ACOT9-1	ACOT9	x	AAGAGGAGCTCTTTAGACAA	449	528	482	436	399	500	466	266838591669	-0.128	-0.862003450410443	0.389	0.892	268693403717379	0.00799	-0.136	0.915099168127928
ACOT9-2	ACOT9	x	CTTACCAATCTTATCCACCA	580	586	392	401	599	618	529	272345567203519	0.0545	0.290019189886928	0.772	0.973	271544619861688	0.0102	0.0443	103849912455161
ACOT9-3	ACOT9	x	GAGAAACATCTCATGTATGG	429	474	518	497	391	347	443	264640372622307	-0.202	-121950854937932	0.223	0.817	267547282320781	0.00713	-0.209	0.869344560090022
ACOT9-4	ACOT9	x	TCTTCCCGACCCAGCTAACA	586	454	615	673	576	488	565	275204844781944	0.0698	0.438693619177598	0.661	0.957	274167674339208	0.0113	0.0585	104957117207746
ACOX1-1	ACOX1	x	ACCTATCACCGGATTAACGA	81	78	66	61	71	74	72	185733249643127	-0.127	-0.379797843239816	0.704	0.963	18750612633917	-0.0288	-0.0982	0.915733686418126
ACOX1-2	ACOX1	x	CTGTGGTTTCCAAGCCTCGA	132	143	213	147	143	109	148	217026171539496	-0.29	-107504573867259	0.282	0.849	221129856728305	-0.00938	-0.281	0.817902058557781
ACOX1-3	ACOX1	x	GCGCCGCCGAGAGATCGGTG	30	33	63	35	32	49	40	160205999132796	-0.119	-0.244955742436832	0.806	0.978	16232492903979	-0.0413	-0.0777	0.92082569720504
ACOX1-4	ACOX1	x	TGGCATTGAAGCATGTCGGA	81	111	94	82	109	50	88	194448267215017	-0.247	-0.704755068609665	0.481	0.918	197924477840938	-0.024	-0.223	0.842646829503152
ACOX2-1	ACOX2	x	GACCATCTTCTAACCAACCC	372	331	431	374	284	376	361	255750720190566	-0.133	-0.751299383275166	0.452	0.911	257749179983723	0.0036	-0.137	0.911933165519769
ACOX2-2	ACOX2	x	GCATAACTGATGGCCAGCTG	466	436	530	495	442	555	487	268752896121463	0.0592	0.398823372181263	0.69	0.961	267882176325217	0.00875	0.0504	1041887855323
ACOX2-3	ACOX2	x	GTGTATCACAAACTCCTGGG	382	320	396	355	320	359	355	255022835305509	-0.0866	-0.531240431613993	0.595	0.945	256348108539441	0.00331	-0.0899	0.941739533988746
ACOX2-4	ACOX2	x	TGCTGTACCGAGTTTGACGT	207	145	257	197	163	215	197	229446622616159	-0.0829	-0.336870725069391	0.736	0.968	230749603791321	-0.00557	-0.0773	0.944157860918115
ACOX3-1	ACOX3	x	AAGCCACGGCAGTAATACCA	401	557	301	382	426	469	423	262634036737504	0.0205	0.103046261319757	0.918	0.991	26229044753882	0.00634	0.0142	101431095226936
ACOX3-2	ACOX3	x	CCGCACGCCTCACCTTAAAG	428	515	520	504	444	614	504	270243053644553	0.0945	0.601640725660653	0.547	0.936	268812307140565	0.00934	0.0852	106769530892173
ACOX3-3	ACOX3	x	GATCCCAACTGCACATACGA	177	128	164	241	179	208	183	226245108973043	0.421	181442389569388	0.0696	0.653	219405158799542	-0.00655	0.428	133885525697844
ACOX3-4	ACOX3	x	GCGTCAGTTTGGACCCACAG	238	177	263	236	227	206	224	235024801833416	-0.0193	-0.0907599469022888	0.928	0.992	23541084391474	-0.00402	-0.0153	0.986711343695511
ACOXL-1	ACOXL	x	AAGCCACAGCTAATCTCGAA	188	156	164	163	139	183	166	222010808804005	-0.0668	-0.288391324396656	0.773	0.973	222874245756426	-0.00753	-0.0593	0.954753361886042
ACOXL-2	ACOXL	x	ACAGGAACGATGAAACAGTG	93	106	98	73	152	108	105	202118929906994	0.165	0.51589660465275	0.606	0.947	199563519459755	-0.0186	0.184	112116607802851
ACOXL-3	ACOXL	x	ATGTTTGCAATGACCGAGAG	108	148	148	123	144	141	135	213033376849501	0.0142	0.0552571161137111	0.956	0.995	212926011039094	-0.0115	0.0257	100989128855289
ACOXL-4	ACOXL	x	TGACAAGGTTCGGATACCCA	50	86	78	66	58	93	72	185733249643127	0.0201	0.0543454423974924	0.957	0.995	185329251862953	-0.0288	0.0489	101402976454135
ACP1-1	ACP1	x	ACATAGTATATAATCAAATG	87	95	111	136	123	70	104	201703333929878	0.167	0.522071372186073	0.602	0.946	198974636563445	-0.0189	0.186	112272142207361
ACP1-2	ACP1	x	ACCCAGACACACAAACAGCA	258	330	343	321	207	434	316	24996870826184	0.0473	0.201857883351208	0.84	0.982	249182842626168	0.00132	0.046	103332924011952
ACP1-3	ACP1	x	GGAACCCCCCTGACTACCGA	619	632	618	758	629	684	657	281756536955978	0.148	120524805572634	0.228	0.821	279448804665917	0.0139	0.134	110803234786493
ACP1-4	ACP1	x	GGGGTTCCCTATCTCATACC	95	112	74	78	132	100	98	199122607569249	0.142	0.443045311580019	0.658	0.957	197158506518542	-0.0207	0.163	110343374004196
ACP2-1	ACP2	x	ACATGGTGGCCAACGAGACA	48	44	43	47	72	46	50	169897000433602	0.29	0.703380351708245	0.482	0.918	165321251377534	-0.0364	0.326	122264027769207
ACP2-2	ACP2	x	ACCAGTGAAGACATATCCCA	103	121	136	146	185	138	138	213987908640124	0.382	148082726032411	0.139	0.751	207918124604762	-0.011	0.393	130314714936329
ACP2-3	ACP2	x	CACCTCTTATCACCGGCAAG	133	200	133	170	208	166	168	222530928172586	0.223	0.895704809013585	0.37	0.886	219126466197034	-0.00741	0.23	116715810181847
ACP5-1	ACP5	x	ACCCACGGCTACAAAGCGCA	234	245	218	283	307	271	260	241497334797082	0.305	168800939605092	0.0914	0.69	236611152337835	-0.00184	0.307	123541863712693
ACP5-2	ACP5	x	CTGGACACAGTGACACTATG	569	530	577	557	516	397	524	271933128698373	-0.189	-125458690961561	0.21	0.809	27471527595746	0.01	-0.199	0.877213548732822
ACP5-3	ACP5	x	GCTCGGCTATGGACCACACG	311	249	227	311	230	170	250	239794000867204	-0.147	-0.624867921387891	0.532	0.93	24188534776394	-0.00245	-0.145	0.903126510151822
ACP5-4	ACP5	x	GTACCAGGGCACTTTGCGAA	109	93	77	96	119	140	106	202530586526477	0.348	117309440926058	0.241	0.827	196848294855394	-0.0183	0.366	127279493527594
ACP6-1	ACP6	x	AAAAAGGTGAAGGACAGGAT	158	96	140	143	65	98	117	206818586174616	-0.365	-110381089919397	0.27	0.843	211837496710591	-0.0154	-0.35	0.77646887500104
ACP6-2	ACP6	x	ACAGTCACCAATCTAGCTGG	154	160	82	42	72	73	97	198677173426624	-1.08	-305398236232651	0.00226	0.215	212057393120585	-0.021	-1.06	0.473028823362798
ACP6-3	ACP6	x	ACCAACCTTCAACCCACAGG	60	57	110	62	40	107	73	186332286012046	-0.119	-0.280302960319121	0.779	0.975	187890460247346	-0.0285	-0.0905	0.92082569720504
ACP6-4	ACP6	x	GCAGGTCGTGTTTCGACACG	81	94	124	116	113	103	105	202118929906994	0.151	0.518264390743441	0.604	0.946	199854993360477	-0.0186	0.17	111033883362864
ACPP-1	ACPP	x	AAAGGCAGGTATAGCAACTG	161	209	268	247	288	264	240	238021124171161	0.325	148912952461118	0.136	0.748	23276994240015	-0.00308	0.328	125266443862413
ACPP-2	ACPP	x	ACTCCTTGGCTAGTACACTT	306	302	272	339	324	267	302	248000694295715	0.0797	0.452186037448434	0.651	0.956	246736141743051	0.000585	0.0791	105679826269055
ACPP-3	ACPP	x	CTACGACCCTTTATATTGTG	156	223	173	226	170	245	199	229885307640971	0.216	0.924116930886145	0.355	0.882	226481782300954	-0.00544	0.221	116150873192572
ACPP-4	ACPP	x	GCCATGAGGATTCCTTTATG	183	181	177	135	128	208	169	222788670461367	-0.2	-0.802151777784694	0.422	0.902	225607601038691	-0.00735	-0.193	0.870550563296124
ACPT-1	ACPT	x	AGGCTGGTAGTGGAAGACCG	269	156	299	220	274	257	246	239093510710338	0.0528	0.221674683532457	0.825	0.98	238261731147748	-0.0027	0.0555	103727612959296
ACPT-2	ACPT	x	TATCCTTGCAAACTTCTCCC	57	69	125	79	40	66	73	186332286012046	-0.44	-108330519808825	0.279	0.847	192255246676138	-0.0285	-0.412	0.737134608645551
ACPT-3	ACPT	x	TCGCCATGGCGGAATACCTG	240	222	232	295	301	248	256	240823996531185	0.282	152776337043362	0.127	0.738	236423821573519	-0.00208	0.284	12158792831831
ACPT-4	ACPT	x	TTGGATATTGGAGCCCACGT	256	238	236	354	276	245	268	242813479402879	0.261	133567263455699	0.182	0.789	238620160540079	-0.00135	0.262	119830902133942
ACR-1	ACR	x	AAGCGCCCACACGAAATGGG	182	188	195	153	180	174	179	225285303097989	-0.156	-0.727989347723633	0.467	0.915	227492719309978	-0.00679	-0.149	0.897510050667261
ACR-2	ACR	x	CCCCGACACTTACTCACACG	219	227	146	84	160	133	162	220951501454263	-0.651	-229948942240883	0.0215	0.483	229520045200326	-0.00781	-0.643	0.63683873766325
ACR-3	ACR	x	GAAAGCGCCTATGTGGTCGT	96	150	154	154	126	133	136	213353890837022	0.0461	0.169860929068094	0.865	0.984	21249387366083	-0.0114	0.0575	10324700983768
ACR-4	ACR	x	TAATGTGCATGACTGGAGAC	2	1	2	1	1	2	2	0.301029995663981	-0.322	-0.152726144126138	0.879	NA	0.221848749616356	-0.0515	-0.27	0.799960128332753
ACRBP-1	ACRBP	x	AAGAAGCGTTCGTATTCGGT	377	239	252	335	271	350	304	248287358360875	0.139	0.670398863807267	0.503	0.923	246139847045683	0.00069	0.138	110114159809796
ACRBP-2	ACRBP	x	CAAACCAGGAGGCATAAGGG	407	373	424	339	512	317	395	259659709562646	-0.0438	-0.232131355141494	0.816	0.979	260350523220214	0.00516	-0.049	0.970096384935269
ACRBP-3	ACRBP	x	GACTCTACTTCTCGTACCCG	151	150	131	125	160	101	136	213353890837022	-0.162	-0.614299974678786	0.539	0.933	215836249209525	-0.0114	-0.151	0.893785162356787
ACRBP-4	ACRBP	x	GGTGCTGTGCTATTCGATCG	351	485	355	447	447	448	422	262531245096167	0.172	105156282039319	0.293	0.855	259879050676312	0.0063	0.166	112661922849728
ACRC-1	ACRC	x	AAACTATTGTGGAGCCACCG	315	329	324	281	307	220	296	247129171105894	-0.261	-142574352826491	0.154	0.765	250875410258873	0.000263	-0.261	0.834509281155409
ACRC-2	ACRC	x	CAAACCACCAAGTGATCCTG	260	432	295	370	254	210	304	248287358360875	-0.243	-102611576332745	0.305	0.86	251719589794997	0.00069	-0.244	0.844986384412514
ACRC-3	ACRC	x	GCATCCTTAATGTCCAGTCA	308	251	395	302	225	285	294	246834733041216	-0.233	-112444668419168	0.261	0.837	250242711998443	0.000154	-0.233	0.850863729506541
ACRC-4	ACRC	x	TTATTGGAAATAAACAGCGA	128	108	154	115	144	92	124	209342168516224	-0.152	-0.536298622309546	0.592	0.944	211394335230684	-0.0138	-0.138	0.900001929793512
ACRV1-1	ACRV1	x	CCTGACTCAAGCTCACTCAA	156	150	234	241	228	161	195	229003461136252	0.222	0.889048136094604	0.374	0.888	225527250510331	-0.0057	0.228	116634936978847
ACRV1-2	ACRV1	x	GCTGAAGGTGAGCATACTGT	179	167	136	168	175	142	161	220682587603185	0.00895	0.0379310041270504	0.97	0.997	220592578351919	-0.00789	0.0168	100622294986344
ACRV1-3	ACRV1	x	TGGTTCAAGCAAGCACACTG	527	444	534	441	621	569	523	271850168886727	0.116	0.740531567849362	0.459	0.913	27004152452102	0.00998	0.106	108372596684478
ACRV1-4	ACRV1	x	TTCAGGTGAGCACGCTTCAG	229	132	242	248	214	159	204	23096301674259	0.0424	0.162054647146445	0.871	0.985	230319605742049	-0.00513	0.0475	102982557213175
ACSBG1-1	ACSBG1	x	GAAGGTGAATAATGCCCAGT	363	248	234	393	281	257	296	247129171105894	0.14	0.631688607666224	0.528	0.93	244973545423003	0.000263	0.14	110190511587661
ACSBG1-2	ACSBG1	x	GGAGCCCACATCACACATGG	192	156	266	273	238	307	239	237839790094814	0.414	182686392160766	0.0677	0.65	231104711642151	-0.00314	0.417	133237482509202
ACSBG1-3	ACSBG1	x	TCAAAAGAACTTCTATGGAG	156	180	157	176	109	189	161	220682587603185	-0.0567	-0.218694153689266	0.827	0.98	221572566455757	-0.00789	-0.0488	0.961460837763722
ACSBG1-4	ACSBG1	x	TGTGCATCGGATGTTCTACG	135	75	82	135	151	127	118	207188200730613	0.5	167312966605614	0.0943	0.694	198826159672876	-0.0151	0.515	14142135623731
ACSBG2-1	ACSBG2	x	AAATTCAGGGATGGTCATCG	365	330	271	322	338	379	334	252374646681156	0.105	0.600824416933688	0.548	0.936	250785587169583	0.00225	0.103	107549439045738
ACSBG2-2	ACSBG2	x	ACACGAGAGTCTTAGCCATG	428	386	459	413	391	435	419	26222140229663	-0.0391	-0.263340506469381	0.792	0.976	262770714893399	0.00617	-0.0453	0.973261910445234
ACSBG2-3	ACSBG2	x	GGGACCACAGGCATACCCAA	177	255	219	290	232	200	229	235983548233989	0.149	0.674542581062136	0.5	0.923	233645973384853	-0.00374	0.153	110880064360307
ACSBG2-4	ACSBG2	x	TCCATGAAATCATCCCACTG	215	185	187	232	215	211	208	231806333496276	0.165	0.819251555338491	0.413	0.9	229151684652795	-0.0049	0.17	112116607802851
ACSF2-1	ACSF2	x	ACGTAGCTGAGGCCTCCGAT	689	567	569	706	488	627	608	278390357927274	-0.00317	-0.0206223910197905	0.984	0.998	278414161407283	0.0126	-0.0158	0.997805135682657
ACSF2-2	ACSF2	x	ATGGCTCGGATCAACTCTGG	167	168	233	194	199	232	199	229885307640971	0.138	0.617839674187135	0.537	0.932	227722708099136	-0.00544	0.143	110037860936614
ACSF2-3	ACSF2	x	CGTGGGGGTACCATACAGGA	120	78	87	134	100	95	102	200860017176192	0.207	0.673910541888669	0.5	0.923	197772360528885	-0.0195	0.226	115428541751684
ACSF2-4	ACSF2	x	GTCTTCATGGAGGACGACCA	218	177	145	252	153	170	186	226951294421792	0.0906	0.354005020184912	0.723	0.966	225527250510331	-0.00636	0.097	106481293362912
ACSF3-1	ACSF3	x	CCATGATCATCTACACCAGT	277	333	462	428	281	230	335	252504480703685	-0.191	-0.81032860287363	0.418	0.901	255307353063709	0.0023	-0.193	0.875998315067126
ACSF3-2	ACSF3	x	GCAGCGCGTTGACCACACCA	339	286	359	403	349	327	344	253655844257153	0.133	0.77936936559718	0.436	0.906	251587384371168	0.00276	0.13	109657158858789
ACSF3-3	ACSF3	x	TAACGATGCCTCCTACGTCG	340	410	408	433	433	335	393	259439255037543	0.0526	0.31596254455693	0.752	0.971	258658730467176	0.00508	0.0475	103713234255481
ACSF3-4	ACSF3	x	TCTTAAGTTCTGAAACGCCG	273	267	295	302	280	257	279	24456042032736	0.00689	0.0392285631019983	0.969	0.996	244456522076394	-0.000696	0.00759	100478720630695
ACSL1-1	ACSL1	x	ATCACGTACATAGTCAACAA	240	332	260	274	251	271	271	243296929087441	-0.0638	-0.334416899141821	0.738	0.968	244300207157106	-0.00117	-0.0626	0.956740781333941
ACSL1-2	ACSL1	x	CAAGAGCCATCGCTTCAGCG	90	129	190	90	92	133	121	208278537031645	-0.377	-117456395348046	0.24	0.827	213460205328768	-0.0144	-0.363	0.770037174236072
ACSL1-3	ACSL1	x	GATGCCAATGAACTGATCTG	245	262	214	288	240	219	245	238916608436453	0.0511	0.258198287751966	0.796	0.976	238081400999977	-0.00277	0.0539	103605457490195
ACSL1-4	ACSL1	x	GTTTCCGAGAGCCTAAACAA	234	223	190	218	214	182	210	232221929473392	-0.0755	-0.366659029143361	0.714	0.965	233378302594904	-0.00478	-0.0707	0.949013161050957
ACSL3-1	ACSL3	x	ATGATTACTGCAATATCTGA	49	24	92	62	32	49	51	170757017609794	-0.206	-0.410293100869244	0.682	0.96	174036268949424	-0.036	-0.17	0.866937563514687
ACSL3-2	ACSL3	x	GAAAGTTCGAAGCTTGCTAG	55	61	53	89	70	66	66	181954393554187	0.413	116817791495201	0.243	0.829	175076544989401	-0.0305	0.444	133145161323637
ACSL3-3	ACSL3	x	GTGGTGAAGAGTAACCAATG	13	18	18	28	16	19	19	127875360095283	0.363	0.552404796554633	0.581	0.943	121307482530885	-0.0564	0.419	12860974834306
ACSL3-4	ACSL3	x	TATCTAAAGTATCACATCCA	63	109	76	77	48	40	69	183884909073726	-0.588	-150184072879146	0.133	0.745	191733042610655	-0.0296	-0.558	0.665264520540343
ACSL4-1	ACSL4	x	AAGCCCACTTCAGACAAACC	352	354	375	358	447	398	381	258092497567562	0.154	0.984604519398659	0.325	0.868	255670443923365	0.00454	0.149	111265012058483
ACSL4-2	ACSL4	x	ACCTGGTCAGAGAGTGTAAG	373	407	464	410	588	386	438	26414741105041	0.154	0.857759639033197	0.391	0.892	261769912563514	0.00693	0.147	111265012058483
ACSL4-3	ACSL4	x	GCATCATCACTCCCTTAGGT	268	273	222	242	273	263	257	240993312333129	0.0281	0.150566317023289	0.88	0.986	240540328323522	-0.00202	0.0301	101966835857352
ACSL4-4	ACSL4	x	GTGTGTCTGAGGAGATAGCG	234	213	276	232	219	242	236	237291200297011	-0.0611	-0.312872122710005	0.754	0.971	238201704257487	-0.00332	-0.0578	0.958532995745926
ACSL5-1	ACSL5	x	CAGAGTTGGATTCTTCCAAG	255	257	236	282	229	241	250	239794000867204	0.00769	0.0410526361809412	0.967	0.996	23967803431448	-0.00245	0.0101	100534453315178
ACSL5-2	ACSL5	x	CTTATCCCTATATGATGCTG	253	234	149	172	223	134	194	228780172993023	-0.266	-101438501700809	0.31	0.862	232633586092875	-0.00577	-0.26	0.831622098374906
ACSL5-3	ACSL5	x	CTTGTTGACAATATGTACGA	322	259	317	442	318	345	334	252374646681156	0.299	162203739922399	0.105	0.711	247615508194764	0.00225	0.297	123029134475114
ACSL5-4	ACSL5	x	TCTGATAGAGCAGAGTACCT	243	273	256	277	222	302	262	241830129131975	0.0532	0.278033876395419	0.781	0.975	241049604561607	-0.00171	0.0549	103756376347552
ACSL6-1	ACSL6	x	CTGAGATGCTAAGCCCACGG	353	288	298	234	296	310	296	247129171105894	-0.161	-0.865862805027244	0.387	0.891	249554433754645	0.000263	-0.161	0.894404901782606
ACSL6-2	ACSL6	x	GATGCTCACCCATGGGAACG	325	389	331	176	264	346	305	248429983934679	-0.411	-18481579468183	0.0646	0.642	254199503572741	0.000743	-0.412	0.752101875694344
ACSL6-3	ACSL6	x	GTCTCCACAGTGGATCATTG	388	522	535	322	455	415	440	264345267648619	-0.278	-157138465228212	0.116	0.726	26827465923729	0.00701	-0.285	0.824733548610081
ACSL6-4	ACSL6	x	TCTGTCGTCTATTGCCACGG	260	254	281	189	254	186	237	23747483460101	-0.338	-16694047181094	0.095	0.696	242324587393681	-0.00326	-0.335	0.79113730118545
ACSM1-1	ACSM1	x	CAAGGTCTTTGACTTAACAC	155	93	176	170	169	144	151	217897694729317	0.188	0.686994180844171	0.492	0.921	215024460187307	-0.00895	0.197	113918337722211
ACSM1-2	ACSM1	x	CCCCCCAAAAGTGGTTAATG	116	121	139	61	171	79	114	205690485133647	-0.274	-0.76952334783259	0.442	0.908	2098066590208	-0.0161	-0.258	0.827023368443266
ACSM1-3	ACSM1	x	CGCTGTCCATGGTTCTACCA	182	190	180	177	119	135	164	22148438480477	-0.357	-14942765326197	0.135	0.747	226481782300954	-0.00767	-0.349	0.780786492607391
ACSM1-4	ACSM1	x	GCACTGCTATACTGGCGGGG	185	146	139	202	116	127	152	218184358794477	-0.0789	-0.287358661294116	0.774	0.973	219497660321605	-0.00882	-0.0701	0.946779254699453
ACSM2A-1	ACSM2A	x	ACAGGCTCCCGAGAGGACGT	131	122	139	196	162	186	156	219312459835446	0.473	203853665618786	0.0415	0.58	211616481230079	-0.00835	0.481	138799271901559
ACSM2A-2	ACSM2A	x	GTGCATGCTCCTAATGCCCA	185	163	185	126	120	88	144	215836249209525	-0.674	-268165812529149	0.00733	0.338	224960595430691	-0.00999	-0.664	0.626766510220345
ACSM2A-3	ACSM2A	x	TGACGCAGTTCTGTAGATGG	151	135	170	157	158	173	157	219589965240923	0.0978	0.422839050445066	0.672	0.958	218184358794477	-0.00825	0.106	107014033519188
ACSM2A-4	ACSM2A	x	TGTCTGAGAAAAGCTGTGAT	114	81	132	57	176	158	120	207918124604762	0.258	0.696979344185022	0.486	0.919	203742649794062	-0.0147	0.273	119581979677612
ACSM2B-1	ACSM2B	x	ATGTGGACCATATCAGACAC	175	189	186	150	134	133	161	220682587603185	-0.399	-177881455119134	0.0753	0.664	226324143477458	-0.00789	-0.391	0.758383772687221
ACSM2B-2	ACSM2B	x	GAAGGGACTCCCCTCCAGCG	69	97	59	89	66	70	75	18750612633917	3.82e-07	1.0906e+08	1	1	18750612633917	-0.028	0.028	100000026478226
ACSM2B-3	ACSM2B	x	TGTCTGAGAAAAGCTGCGAT	102	102	153	91	92	109	108	203342375548695	-0.29	-0.983900017022607	0.325	0.868	207554696139253	-0.0177	-0.272	0.817902058557781
ACSM2B-4	ACSM2B	x	TTACCTTTAGAATAACCAGT	91	109	114	60	88	107	95	197772360528885	-0.3	-0.940906040488537	0.347	0.878	201980839335355	-0.0217	-0.278	0.812252396356236
ACSM3-1	ACSM3	x	ATTTCTGTTGATCCACCAGA	392	350	353	391	415	314	369	256702636615906	0.0326	0.196339133634172	0.844	0.982	256229286445647	0.00398	0.0286	102285383511537
ACSM3-2	ACSM3	x	GAAGCCTGTTCCCTACAAAG	199	133	162	128	176	146	157	219589965240923	-0.135	-0.532033666329762	0.595	0.945	221660569420398	-0.00825	-0.127	0.910669833591978
ACSM3-3	ACSM3	x	TGAAACAGGACTTCAAACTG	230	227	216	171	131	150	188	227415784926368	-0.574	-266598355277966	0.00768	0.346	235089380950431	-0.00622	-0.568	0.671751712860648
ACSM3-4	ACSM3	x	TGCAACAGCGTCTACTGCTG	340	257	313	291	360	255	303	24814426285023	-0.00636	-0.0329166864621249	0.974	0.997	248192013760143	0.000638	-0.007	0.995601286734521
ACSM4-1	ACSM4	x	AGAGGGTGAACCCAATGCCG	237	309	327	286	266	231	276	244090908206522	-0.157	-0.808865232279968	0.419	0.901	246389298898591	-0.000872	-0.156	0.896888159662015
ACSM4-2	ACSM4	x	CACGAGCATCCGGTACACAG	93	56	67	132	93	42	80	190308998699194	0.306	0.743619775479458	0.457	0.913	185733249643127	-0.0266	0.333	123627526092095
ACSM4-3	ACSM4	x	CATTCGATGCACAAAAACAC	182	139	261	217	213	196	201	230319605742049	0.105	0.428733154095204	0.668	0.958	228780172993023	-0.00531	0.11	107549439045738
ACSM4-4	ACSM4	x	TACAATGGACTCCACCGCTG	238	243	252	229	165	251	230	236172783601759	-0.185	-0.874502270272608	0.382	0.89	238798271992147	-0.00368	-0.181	0.879649075922436
ACSM5-1	ACSM5	x	ATAACTTTGGCATCAACTCG	307	245	226	336	239	256	268	242813479402879	0.0951	0.462549802607175	0.644	0.955	241385834227003	-0.00135	0.0965	106813944326631
ACSM5-2	ACSM5	x	CTTTACCAGCGGAACCACCG	82	70	86	80	135	40	82	191381385238372	0.0995	0.246102566998694	0.806	0.977	189945570233685	-0.026	0.126	107140207851908
ACSM5-3	ACSM5	x	GTGGAAACACCAGACTGGTG	310	240	210	183	217	187	224	235024801833416	-0.373	-173614127631548	0.0825	0.674	240369233756113	-0.00402	-0.369	0.772175133091785
ACSM5-4	ACSM5	x	TGGTCAGTGTGGCTTGCATG	247	188	252	260	247	189	230	236172783601759	0.0188	0.0876617982307926	0.93	0.992	235983548233989	-0.00368	0.0225	101311644266238
ACSM6-1	ACSM6	x	CAGGGATAAAGATCCACCAA	100	82	133	85	82	142	104	201703333929878	-0.0277	-0.0846788972904856	0.933	0.993	202118929906994	-0.0189	-0.0088	0.980982972455252
ACSM6-2	ACSM6	x	CCTGCCTAGGACGGACTCAG	192	170	230	152	246	199	198	229666519026153	0.0121	0.0510046243960277	0.959	0.995	229520045200326	-0.0055	0.0176	100842235098309
ACSM6-3	ACSM6	x	TGTCAGATAAGAGCTATGAT	84	107	120	124	71	127	106	202530586526477	0.0501	0.157958663525433	0.874	0.985	201563913430717	-0.0183	0.0684	103533668542473
ACSM6-4	ACSM6	x	TTTGCAGATAGAGTGGTGAT	377	239	266	288	250	278	283	245178643552429	-0.112	-0.549244902598297	0.583	0.943	246834733041216	-0.000464	-0.112	0.925304428037852
ACSS1-1	ACSS1	x	ACCAGCATTGGGATAAACTG	210	154	192	206	178	262	200	230102999566398	0.216	0.940920177326331	0.347	0.878	226795353686239	-0.00537	0.221	116150873192572
ACSS1-2	ACSS1	x	CAGACAACAAGGTCCACATG	99	154	126	165	125	150	136	213353890837022	0.215	0.804556358931441	0.421	0.902	210151795524841	-0.0114	0.226	116070391438372
ACSS1-3	ACSS1	x	GATCAAAGCAACGCTCTCGG	405	513	347	491	449	488	449	265224634100332	0.175	106320038242924	0.288	0.853	262496927079217	0.00736	0.168	112896440480613
ACSS1-4	ACSS1	x	GCTGAAATACGGTGATGCCT	108	140	136	206	231	146	161	220682587603185	0.602	236317884960923	0.0181	0.456	210720996964787	-0.00789	0.61	151781925297405
ACSS2-1	ACSS2	x	CAGGAAGGGGAGTCAACATG	58	93	114	84	125	91	94	19731278535997	0.179	0.528456661204776	0.597	0.945	194612461921715	-0.022	0.201	113209890211067
ACSS2-2	ACSS2	x	CAGTGGCCCATAGGTGACGT	521	483	513	452	477	429	479	268033551341456	-0.16	-117794988217765	0.239	0.826	270386432606707	0.00847	-0.168	0.895025070927972
ACSS2-3	ACSS2	x	GCATTGTGGTCAAGCACCTG	222	195	203	166	187	252	204	23096301674259	-0.0353	-0.158312880912609	0.874	0.985	231527043477859	-0.00513	-0.0302	0.975828821778009
ACSS2-4	ACSS2	x	GGAACCAAGGGATTGACTTG	418	545	394	393	377	520	441	264443858946784	-0.073	-0.412949172749762	0.68	0.959	265545859294007	0.00705	-0.08	0.950659101229818
ACSS3-1	ACSS3	x	ACATGGTATACATCGCCTGT	377	432	452	360	467	431	420	26232492903979	-0.00344	-0.0216307073517492	0.983	0.998	262359383185342	0.00621	-0.00965	0.997618414185175
ACSS3-2	ACSS3	x	CCGGGACCACTAAAGCCCTG	204	167	174	205	156	176	180	225527250510331	-0.0213	-0.0950948327810887	0.924	0.992	225927524755698	-0.00673	-0.0146	0.98534441902259
ACSS3-3	ACSS3	x	CTTGTACCAGCTGATCTGCT	373	269	296	349	208	310	301	247856649559384	-0.114	-0.528430498375692	0.597	0.945	24950815836594	0.000532	-0.115	0.924022572446823
ACSS3-4	ACSS3	x	GGTGTGATTAGGCCCACTGG	73	58	87	68	71	139	83	191907809237607	0.351	0.945490770300013	0.344	0.876	186133523888494	-0.0256	0.377	127544439167854
ACTA1-1	ACTA1	x	CTTCTACAACGAGCTTCGCG	108	140	87	118	149	145	124	209342168516224	0.298	106903248902136	0.285	0.85	204792355231718	-0.0138	0.312	122943886725458
ACTA1-2	ACTA1	x	GGGTCAGAAAGATTCCTACG	133	98	101	96	129	179	123	20899051114394	0.283	0.944287364442144	0.345	0.877	204401682898437	-0.014	0.297	121672235863407
ACTA1-3	ACTA1	x	GGTGAAAGCCGGCTTCGCCG	36	36	23	28	34	82	40	160205999132796	0.6	113572544645071	0.256	0.834	150060235056919	-0.0413	0.641	15157165665104
ACTA1-4	ACTA1	x	TCAGGTAGTCGGTGAGATCG	190	169	234	239	197	168	200	230102999566398	0.0265	0.116178507151957	0.908	0.989	22959334386446	-0.00537	0.0319	101853813702071
ACTA2-1	ACTA2	x	CATGTATGTGGCTATCCAGG	72	139	145	130	90	112	115	206069784035361	-0.101	-0.314249977702892	0.753	0.971	207432874325321	-0.0158	-0.0852	0.932386486436833
ACTA2-2	ACTA2	x	GAAGCTCATTGTAGAAAGAG	133	156	182	198	173	81	154	218752072083646	-0.0594	-0.193034158981269	0.847	0.982	219589965240923	-0.00857	-0.0508	0.95966314902724
ACTA2-3	ACTA2	x	GACGTCCCAGACATCAGGTG	108	128	113	180	187	195	152	218184358794477	0.687	294767380606516	0.0032	0.251	206570417223952	-0.00882	0.696	160993227524224
ACTA2-4	ACTA2	x	GGCCTCACCAGTAGTAACGA	86	121	59	63	41	136	84	192427928606188	-0.148	-0.345019828028814	0.73	0.967	19477603819114	-0.0253	-0.123	0.90250072746243
ACTB-1	ACTB	x	AAGAGCTACGAGCTGCCTGA	56	99	52	64	103	57	72	185733249643127	0.114	0.289043728979936	0.773	0.973	183884909073726	-0.0288	0.143	108222464452571
ACTB-2	ACTB	x	CGTACAGGGATAGCACAGCC	30	7	11	13	19	11	15	117609125905568	-0.159	-0.19996216347131	0.842	0.982	120411998265592	-0.0603	-0.0987	0.895645670090849
ACTB-3	ACTB	x	GGATTCCTATGTGGGCGACG	29	23	38	28	23	42	30	147712125471966	0.0473	0.0888262945721882	0.929	0.992	147712125471966	-0.0474	0.0947	103332924011952
ACTB-4	ACTB	x	TCACCTGGGTCATCTTCTCG	63	54	71	24	73	93	63	179934054945358	0.0153	0.0334925881845711	0.973	0.997	179703659454402	-0.0315	0.0468	1010661585806
ACTBL2-1	ACTBL2	x	GAGGACGCCCTATCATGGAG	107	76	184	211	126	124	138	213987908640124	0.329	0.980501374101213	0.327	0.869	208754480953243	-0.011	0.34	125614238114353
ACTBL2-2	ACTBL2	x	GGAGCTATGAACTTCCTGAT	147	145	69	129	65	101	109	203742649794062	-0.291	-0.821279915395949	0.411	0.899	2080385947186	-0.0174	-0.274	0.817335328488283
ACTBL2-3	ACTBL2	x	GGAGCTCATTGTAGAATGTG	133	109	84	101	128	52	101	200432137378264	-0.214	-0.605183009847378	0.545	0.935	203609634534828	-0.0198	-0.194	0.862143545017596
ACTBL2-4	ACTBL2	x	TGTCCCTCTATGCCTCAGGA	293	304	208	231	244	268	258	241161970596323	-0.116	-0.57061428523511	0.568	0.94	242867462564821	-0.00196	-0.114	0.922742492653798
ACTC1-1	ACTC1	x	CGATGGACGGGAAGACAGCG	426	392	372	469	423	413	416	261909333062674	0.133	0.899365748821138	0.368	0.885	259842570667287	0.00605	0.127	109657158858789
ACTC1-2	ACTC1	x	CTGGGCTTCATCACCTACGT	161	130	101	118	156	105	128	210720996964787	-0.0487	-0.171088991190054	0.864	0.984	211616481230079	-0.0129	-0.0358	0.966807118052086
ACTC1-3	ACTC1	x	GGTACGGCCAGAAGCATACA	337	315	393	334	324	419	354	254900326202579	0.0435	0.250641606868783	0.802	0.977	254199503572741	0.00326	0.0402	103061107431241
ACTC1-4	ACTC1	x	TCTTCATGAGGTAGTCAGTG	164	182	187	186	165	186	178	225042000230889	0.0108	0.0500900567986667	0.96	0.995	224960595430691	-0.00685	0.0176	100751407962006
ACTG1-1	ACTG1	x	AGCTGTAGCCTCGCTCAGTG	374	450	498	310	376	359	394	259549622182557	-0.339	-204802556417412	0.0406	0.576	264411020042996	0.00512	-0.344	0.790589116603944
ACTG1-2	ACTG1	x	ATGGAAGGAAACACGGCTCG	137	230	133	183	115	130	155	219033169817029	-0.224	-0.779539153694389	0.436	0.906	222184874961636	-0.00846	-0.216	0.856188284546457
ACTG1-3	ACTG1	x	CAACAGAGAGAAGATGACTC	167	74	100	120	69	77	101	200432137378264	-0.358	-0.997988166900726	0.318	0.865	205563312427284	-0.0198	-0.338	0.780245480173703
ACTG1-4	ACTG1	x	CTTCTACAACGAGCTGCGCG	80	92	38	38	85	75	68	183250891270624	-0.0849	-0.197144705066105	0.844	0.982	184509804001426	-0.0299	-0.055	0.942849887027405
ACTG2-1	ACTG2	x	AGAGCTATGAGCTGCCAGAT	342	396	409	374	364	429	386	258658730467176	0.0249	0.157975818962956	0.874	0.985	258244216318161	0.00477	0.0201	10174091682289
ACTG2-2	ACTG2	x	CTGGATACCTGTGGTCACAA	429	368	353	316	306	328	350	254406804435028	-0.276	-170894827611072	0.0875	0.682	258357658563395	0.00306	-0.279	0.82587766493572
ACTG2-3	ACTG2	x	TGAATCCAGGACGATGCCTG	486	476	408	420	518	393	450	265321251377534	-0.0417	-0.264520437582042	0.791	0.976	265959931243674	0.0074	-0.0491	0.971509494258729
ACTG2-4	ACTG2	x	TGATGATGCCGTGTTCAATG	386	490	475	393	394	501	440	264345267648619	-0.0689	-0.423711086110753	0.672	0.958	265353409430237	0.00701	-0.0759	0.953364625198178
ACTL10-1	ACTL10	x	AGAAGATGCCCAAAACGCTG	151	210	236	175	136	139	174	22405492482826	-0.408	-165827341643882	0.0973	0.7	229885307640971	-0.00707	-0.401	0.753667454779191
ACTL10-2	ACTL10	x	AGATGTGTGATGGCCTTGCG	464	557	353	406	444	479	450	265321251377534	-0.048	-0.276506866528496	0.782	0.975	266086547800387	0.0074	-0.0554	0.967276329613932
ACTL10-3	ACTL10	x	CACGCCACGCCCATCTACGC	267	259	247	243	245	282	257	240993312333129	-0.00561	-0.0308409192030359	0.975	0.997	241105823919866	-0.00202	-0.00359	0.996118994959507
ACTL10-4	ACTL10	x	GGCCACCTTCCGACTGAACG	375	284	272	295	319	301	308	248855071650044	-0.025	-0.136939605653621	0.891	0.988	249182842626168	0.000901	-0.0259	0.982820598545251
ACTL6A-1	ACTL6A	x	ACCACCATACCAATAGCTGT	254	304	269	260	346	281	286	245636603312904	0.101	0.541399726727242	0.588	0.944	244038425483288	-0.000293	0.101	107251661681794
ACTL6A-2	ACTL6A	x	ACTGCAATTCCAGTCCACGA	47	101	78	79	73	66	74	186923171973098	-0.052	-0.141216095319819	0.888	0.987	187698718442774	-0.0282	-0.0238	0.964598184584138
ACTL6A-3	ACTL6A	x	AGAAGTTGCCTCAGGTTACG	311	232	299	188	321	261	269	242975228000241	-0.129	-0.584034607937844	0.559	0.939	244819083677999	-0.00129	-0.128	0.914465089499901
ACTL6A-4	ACTL6A	x	TGTTCCGAGGGAGAATATGG	119	121	128	78	145	70	110	204139268515822	-0.329	-102184179917243	0.307	0.861	208872656395386	-0.0171	-0.312	0.79608809877878
ACTL6B-1	ACTL6B	x	AGTGGAACACACGGGCCAAG	72	76	102	52	79	62	74	186923171973098	-0.373	-106816277008718	0.285	0.851	192081875395238	-0.0282	-0.345	0.772175133091785
ACTL6B-2	ACTL6B	x	ATGCCAGCTTTGCAAACGGG	525	629	486	427	550	505	520	27160033436348	-0.146	-0.957926480558372	0.338	0.874	273772259332804	0.00988	-0.156	0.903752726751086
ACTL6B-3	ACTL6B	x	CACTCACTGTTCATCGTAGG	375	435	369	307	342	282	352	254654266347813	-0.341	-20697145313199	0.0385	0.566	259439255037543	0.00316	-0.344	0.789493886700555
ACTL6B-4	ACTL6B	x	TTGGCTGCGATCATGTAAGG	236	223	268	256	168	219	228	235793484700045	-0.177	-0.826315322344337	0.409	0.898	238441315613938	-0.00379	-0.173	0.884540435331541
ACTL7A-1	ACTL7A	x	ATCGCAAGGAGACATTCGTG	626	710	605	692	681	715	672	282736927305383	0.105	0.872897712749833	0.383	0.89	28109042806687	0.0143	0.0907	107549439045738
ACTL7A-2	ACTL7A	x	GGGCCATGGCGTGTCCTACG	451	570	435	457	470	436	470	267209785793572	-0.0952	-0.630475091214814	0.528	0.93	268604012025736	0.00814	-0.103	0.936142461537064
ACTL7A-3	ACTL7A	x	GTGGCTCTGAACTCGTATGG	315	284	305	388	319	348	326	251321760006794	0.223	134007586075497	0.18	0.788	24790471757557	0.00184	0.221	116715810181847
ACTL7A-4	ACTL7A	x	GTTGTTGAGATCTTGTGGGT	157	153	130	237	221	145	174	22405492482826	0.455	182801098473877	0.0675	0.65	216633142176652	-0.00707	0.462	13707828049797
ACTL7B-1	ACTL7B	x	ACTCCTACGGCAAGACCTCG	208	242	212	222	175	189	208	231806333496276	-0.176	-0.849043724979275	0.396	0.894	234373673472004	-0.0049	-0.171	0.885153764579545
ACTL7B-2	ACTL7B	x	AGCCGCGCCGACTACGCTGG	144	222	172	112	153	201	167	222271647114758	-0.207	-0.764632347074124	0.444	0.909	225366102094673	-0.00747	-0.2	0.866336856400087
ACTL7B-3	ACTL7B	x	CAAGAAGAAGTGCTGCTATG	443	381	469	453	392	373	418	262117628177504	-0.0862	-0.55204831729897	0.581	0.943	263447727016073	0.00613	-0.0923	0.942000675830142
ACTL7B-4	ACTL7B	x	CGTGGGCAAACGCTGCCCCG	262	191	274	241	281	226	246	239093510710338	0.0411	0.198312549855229	0.843	0.982	238441315613938	-0.0027	0.0438	102889802319833
ACTL8-1	ACTL8	x	CTGGTGGAAAGGCTGCACGC	531	434	369	336	438	342	408	261066016308988	-0.257	-144744853032601	0.148	0.76	264803457486087	0.00572	-0.263	0.836826242683391
ACTL8-2	ACTL8	x	GAGACTCTTGAGGAGATAGG	404	419	431	273	418	409	392	259328606702046	-0.189	-105627486492183	0.291	0.854	262117628177504	0.00503	-0.194	0.877213548732822
ACTL8-3	ACTL8	x	TGTCTCCGTGATGATCACAG	361	425	376	410	461	434	411	261384182187607	0.167	1118590846476	0.263	0.839	258808487333465	0.00584	0.161	112272142207361
ACTL8-4	ACTL8	x	TTTAGCTACCCCATCGAGCG	374	199	244	360	398	299	312	249415459401844	0.372	16618559946029	0.0965	0.699	243510080181275	0.00111	0.371	129414565448285
ACTL9-1	ACTL9	x	CAGCCCGCTGACACGACCGT	128	186	275	125	184	181	180	225527250510331	-0.265	-0.934029798273334	0.35	0.88	229299404006744	-0.00673	-0.258	0.832198734711525
ACTL9-2	ACTL9	x	CCCAAACCCCAGTCCCAACG	36	118	51	43	100	71	70	184509804001426	0.062	0.13360151137511	0.894	0.988	183463260633609	-0.0293	0.0913	104391192742172
ACTL9-3	ACTL9	x	GCTGCCACCAAAGACCGGCG	45	92	49	82	80	45	66	181954393554187	0.154	0.37244171676915	0.71	0.964	179239168949825	-0.0305	0.184	111265012058483
ACTL9-4	ACTL9	x	TAAGCACCACTATTGCTACG	116	103	155	93	157	183	134	212710479836481	0.211	0.701249034224493	0.483	0.918	209575034748082	-0.0117	0.223	115749021699012
ACTN1-1	ACTN1	x	CAGGACATCAACAATGCCTG	128	130	144	101	164	123	132	212057393120585	-0.0511	-0.189299364374683	0.85	0.982	212710479836481	-0.0121	-0.039	0.965200119978853
ACTN1-2	ACTN1	x	GCAGGGCCTTGATCTCCGAG	459	420	446	373	452	457	434	263748972951251	-0.0476	-0.319163569743756	0.75	0.97	264509462355316	0.00678	-0.0544	0.967544552740112
ACTN1-3	ACTN1	x	GGATCCGCCGCACAATCCCG	116	50	114	144	157	62	107	202938377768521	0.375	0.95951136459953	0.337	0.874	197003677662256	-0.018	0.393	129683955465101
ACTN1-4	ACTN1	x	GGCCCTAACTCAGAAGCGAA	439	463	425	431	404	433	432	263548374681491	-0.0656	-0.465374136374955	0.642	0.954	264574966814477	0.0067	-0.0723	0.955547833772913
ACTN2-1	ACTN2	x	AGGACTTCCGGGATTACCGC	142	87	134	123	140	99	121	208278537031645	-0.00398	-0.0136680637672677	0.989	0.998	208278537031645	-0.0144	0.0104	0.997245076008499
ACTN2-2	ACTN2	x	CCAGGTTAATATTTCCTATG	97	130	137	93	114	105	113	205307844348342	-0.222	-0.792646704884273	0.428	0.903	208398012892939	-0.0163	-0.206	0.857376036634172
ACTN2-3	ACTN2	x	CGAGTCGGCGTCGCTGACAG	67	54	97	40	48	123	72	185733249643127	-0.0471	-0.105536558257379	0.916	0.991	186133523888494	-0.0288	-0.0183	0.967879936243687
ACTN2-4	ACTN2	x	TGATGGTCCAGATCATACCC	308	389	279	408	327	277	331	251982799377572	0.0523	0.267137019245605	0.789	0.976	251232856294703	0.0021	0.0502	103691669936873
ACTN3-1	ACTN3	x	CAGTGAGCTGGACTACCACG	431	371	316	405	400	458	397	259879050676312	0.176	107133796993569	0.284	0.85	257132054883074	0.00525	0.171	112974721457012
ACTN3-2	ACTN3	x	CCATGGCTGGAGAACCGTGT	127	129	173	103	140	129	134	212710479836481	-0.206	-0.773906197709804	0.439	0.907	215533603746506	-0.0117	-0.194	0.866937563514687
ACTN3-3	ACTN3	x	GTCCAGGGCCTTGTTAACGT	179	128	85	146	175	116	138	213987908640124	0.157	0.518060571193828	0.604	0.947	211616481230079	-0.011	0.168	11149662187277
ACTN3-4	ACTN3	x	TGCAACTGGAGTTTGCCCGG	82	49	76	64	93	95	76	188081359228079	0.284	0.799803339285916	0.424	0.902	183884909073726	-0.0277	0.312	121756601866299
ACTN4-1	ACTN4	x	ACAGATCGAGAACATTGATG	171	187	200	204	159	249	195	229003461136252	0.133	0.581648902784805	0.561	0.939	226951294421792	-0.0057	0.139	109657158858789
ACTN4-2	ACTN4	x	ACTCCCACAATGTCAACACC	314	443	436	345	409	402	392	259328606702046	-0.0455	-0.261474407456648	0.794	0.976	259951918895068	0.00503	-0.0505	0.96895394488874
ACTN4-3	ACTN4	x	GTTCATCGTCCATACCATCG	94	48	78	92	103	155	95	197772360528885	0.67	192991608931009	0.0536	0.615	186530142610254	-0.0217	0.692	159107296750984
ACTN4-4	ACTN4	x	TGGGCGGCTTGTGCACACGC	91	130	35	114	92	71	89	194939000664491	0.114	0.275285735622485	0.783	0.975	193111871059219	-0.0237	0.138	108222464452571
ACTR10-1	ACTR10	x	AAAAAGATATGGGTAACACC	30	46	57	62	57	48	50	169897000433602	0.328	0.77810609780667	0.437	0.906	164673038624742	-0.0364	0.364	125527199128264
ACTR10-2	ACTR10	x	AATGAATTTACCCATCACTG	118	94	147	197	214	153	154	218752072083646	0.652	250348283495717	0.0123	0.408	207797319385866	-0.00857	0.661	157134503333516
ACTR10-3	ACTR10	x	AATGGATAGTCAACATTTGG	51	61	51	23	48	23	43	163346845557959	-0.794	-168857420619227	0.0913	0.69	17350663496843	-0.0397	-0.754	0.576742802530011
ACTR10-4	ACTR10	x	ATTCGATAATCACAACTCGG	17	63	25	53	46	49	42	16232492903979	0.495	0.947805728744914	0.343	0.876	154406804435028	-0.0402	0.535	140932075514202
ACTR1A-1	ACTR1A	x	AGTCGTAGCCCTCCTTACGC	54	103	55	78	68	48	68	183250891270624	-0.128	-0.322204458762532	0.747	0.97	184921460620909	-0.0299	-0.0981	0.915099168127928
ACTR1A-2	ACTR1A	x	CGCTACAGGCAGGACCACAG	65	38	85	81	74	109	75	18750612633917	0.49	129730453208326	0.195	0.799	179703659454402	-0.028	0.518	1404444875738
ACTR1A-3	ACTR1A	x	GAAGGTCTCGAAGAAAACTT	88	52	58	79	45	58	63	179934054945358	-0.122	-0.308653181264956	0.758	0.972	181954393554187	-0.0315	-0.0905	0.91891288347905
ACTR1A-4	ACTR1A	x	TGACACGAACGTGCTTGGGT	86	126	44	73	40	81	75	18750612633917	-0.4	-0.943802325653582	0.345	0.877	193111871059219	-0.028	-0.372	0.757858283255199
ACTR1B-1	ACTR1B	x	CTTCATCGGACCAAAAGCAG	92	117	122	137	106	143	120	207918124604762	0.222	0.806620234981141	0.42	0.902	204270673905606	-0.0147	0.237	116634936978847
ACTR1B-2	ACTR1B	x	GCATCCTGTGCTCCTCACGG	36	110	45	100	59	98	75	18750612633917	0.428	0.984912007156612	0.325	0.868	180391211252807	-0.028	0.456	134536720852183
ACTR1B-3	ACTR1B	x	GGTTGTCCGGACAATCAAAG	187	115	85	176	208	173	157	219589965240923	0.525	18251044517926	0.068	0.65	211058971029925	-0.00825	0.533	143893358001082
ACTR1B-4	ACTR1B	x	TCCGTCCTAACAGTGTCGGG	77	53	63	41	79	88	67	182607480270083	0.108	0.274937385230884	0.783	0.975	180843605428811	-0.0302	0.138	107773314504367
ACTR2-1	ACTR2	x	ACTGGTGTAGTGGTAGACTC	48	100	94	58	91	78	78	189209460269048	-0.0923	-0.247150726898376	0.805	0.977	190669411126077	-0.0272	-0.0651	0.93802611917084
ACTR2-2	ACTR2	x	ATCCTCGCAACAGAAGTAGC	395	591	515	408	392	432	456	265896484266444	-0.285	-172396992577206	0.0847	0.679	269925943752361	0.00762	-0.293	0.820741608810498
ACTR2-3	ACTR2	x	GGACGTATCATCAAAGTTGG	116	159	201	90	111	111	131	211727129565576	-0.609	-216654199262154	0.0303	0.53	220048569800083	-0.0123	-0.597	0.655651007107824
ACTR2-4	ACTR2	x	GGATGACATGAAACACCTGT	96	69	47	80	76	78	74	186923171973098	0.142	0.395368041753318	0.693	0.961	184921460620909	-0.0282	0.17	110343374004196
ACTR3-1	ACTR3	x	ACCGGTACGGTAATAGACAG	163	147	187	183	135	169	164	22148438480477	-0.0293	-0.12354883157829	0.902	0.989	221923513401367	-0.00767	-0.0216	0.979895630586605
ACTR3-2	ACTR3	x	ATTAAGGAGTCAGCAAAAGT	268	205	171	213	233	151	207	231597034545692	-0.109	-0.450460745065997	0.652	0.956	233176461264015	-0.00495	-0.104	0.927230546435463
ACTR3-3	ACTR3	x	CCCAATCTTCAACTATACCA	164	169	219	216	182	138	181	225767857486918	-0.0424	-0.174245400902729	0.862	0.984	226481782300954	-0.00668	-0.0357	0.971038229250796
ACTR3-4	ACTR3	x	TTAACAAGTATGATACAGAT	230	176	189	141	122	157	169	222788670461367	-0.503	-215181741912959	0.0314	0.535	229739571100889	-0.00735	-0.496	0.705637921704346
ACTR3B-1	ACTR3B	x	AGGTAGTTGACCAAGCTCAA	399	516	606	549	580	638	548	273878055848437	0.216	13611264594646	0.173	0.783	270500795933334	0.0108	0.205	116150873192572
ACTR3B-2	ACTR3B	x	TACTGTTTGATCCACTTCCG	136	119	102	187	132	141	136	213353890837022	0.366	13851709333882	0.166	0.777	207554696139253	-0.0114	0.377	128877463048502
ACTR3B-3	ACTR3B	x	TGGGTGAACGTACGTTAACG	292	274	271	175	316	254	264	242160392686983	-0.168	-0.768255507902957	0.442	0.908	24456042032736	-0.00159	-0.166	0.890075733252496
ACTR3B-4	ACTR3B	x	TTTGAATCATTTAACGTACC	96	164	139	94	124	114	122	208635983067475	-0.265	-0.91774465978458	0.359	0.883	212385164096709	-0.0142	-0.251	0.832198734711525
ACTR3C-1	ACTR3C	x	CATTTGCCCCGATATAGTCA	140	211	101	129	208	203	165	221748394421391	0.257	0.871145295515472	0.384	0.891	217801718009172	-0.0076	0.265	119499120485678
ACTR3C-2	ACTR3C	x	GCTTACCACTGGGATAACAT	96	102	67	53	62	111	82	191381385238372	-0.23	-0.621264438880805	0.534	0.931	194612461921715	-0.026	-0.204	0.852634891767957
ACTR3C-3	ACTR3C	x	TACTGTTTGATCCACTTCTG	151	130	89	105	149	100	121	208278537031645	-0.0638	-0.213294278659167	0.831	0.98	209108046934733	-0.0144	-0.0494	0.956740781333941
ACTR3C-4	ACTR3C	x	TGGGTGAACGTACATTAACG	328	320	308	478	344	274	342	253402610605613	0.197	0.986244445643849	0.324	0.868	250333663755644	0.00266	0.194	114631218572838
ACTR5-1	ACTR5	x	CGGGACACGCCCAGCCAGCG	192	250	218	146	147	127	180	225527250510331	-0.652	-292433845393701	0.00345	0.258	234242268082221	-0.00673	-0.645	0.636397467637971
ACTR5-2	ACTR5	x	TCATTTGCCGTGAATACAGT	203	141	178	118	102	182	154	218752072083646	-0.377	-13612565311976	0.173	0.783	22405492482826	-0.00857	-0.368	0.770037174236072
ACTR5-3	ACTR5	x	TGAGCACAGCTACATCGCTG	151	129	162	167	197	151	160	220411998265593	0.221	0.929984567778573	0.352	0.881	216830101462943	-0.00797	0.229	116554119813456
ACTR5-4	ACTR5	x	TGGGTAAAACATGCGTACAC	91	101	203	86	75	54	102	200860017176192	-0.878	-243676539992357	0.0148	0.432	21194758409068	-0.0195	-0.858	0.544121220835402
ACTR6-1	ACTR6	x	AGATGTATGCTATGTGTCTC	366	364	399	407	404	474	402	260422605308447	0.187	123376309729774	0.217	0.815	257557268720531	0.00547	0.182	113839402907488
ACTR6-2	ACTR6	x	ATAATTCGGAAGGATTATCT	274	185	331	223	234	352	266	242488163663107	0.0343	0.141524302091066	0.887	0.987	242050583657078	-0.00147	0.0358	102405982554365
ACTR6-3	ACTR6	x	CTCCCCTTGCAGGATAAATG	89	61	61	39	59	38	58	176342799356294	-0.634	-159304841590368	0.111	0.72	184716120057803	-0.0332	-0.601	0.644387315242508
ACTR6-4	ACTR6	x	GGATGTAAAAGAGTCCAGAA	36	48	35	67	47	29	44	164345267648619	0.265	0.567480662227219	0.57	0.94	159842570667287	-0.0392	0.304	120163604952685
ACTR8-1	ACTR8	x	AGCCAACTGTCCTTGTATAG	160	91	95	160	147	189	140	214612803567824	0.52	183482331829157	0.0665	0.647	206195484407311	-0.0106	0.531	143395524801583
ACTR8-2	ACTR8	x	CAACGATTCCAAAAGTTGCG	269	174	121	130	213	187	182	226007138798507	-0.0897	-0.306977423354807	0.759	0.972	227415784926368	-0.00662	-0.0831	0.939718137791671
ACTR8-3	ACTR8	x	CACGTGTATTGTAGACGTTG	188	171	173	205	215	197	192	228330122870355	0.214	103817028985759	0.299	0.858	224879037757539	-0.00592	0.22	115989965450543
ACTR8-4	ACTR8	x	CTTCTCCTACTAAATACTCA	196	174	186	293	233	243	221	234439227368511	0.468	232626637550418	0.02	0.475	226795353686239	-0.00418	0.472	138319062901096
ACTRT1-1	ACTRT1	x	ACGGAGCTGATGACATGGCG	168	120	137	63	98	122	118	207188200730613	-0.587	-191526757139812	0.0555	0.623	215126767533065	-0.0151	-0.572	0.665725806618185
ACTRT1-2	ACTRT1	x	GGTAACAGGATGGGATGACA	260	153	201	171	214	200	200	230102999566398	-0.0698	-0.29302514932033	0.77	0.973	231104711642151	-0.00537	-0.0644	0.952770070866804
ACTRT1-3	ACTRT1	x	TGATTAGACAGGTAGAAACC	86	110	138	157	75	118	114	205690485133647	0.0675	0.20735384490726	0.836	0.981	20466252120919	-0.0161	0.0836	104789923837507
ACTRT1-4	ACTRT1	x	TTAATCAGAAGTACTTCGTG	168	124	163	187	111	161	152	218184358794477	0.0126	0.0473035559158518	0.962	0.996	218089014193745	-0.00882	0.0214	100877190410723
ACTRT2-1	ACTRT2	x	CGCAGTCACCAAGCTCCACG	449	426	447	427	460	547	459	266181268553726	0.117	0.793175411661614	0.428	0.903	264411020042996	0.00774	0.109	108447740884306
ACTRT2-2	ACTRT2	x	CGTGCCCGCTTTCTACCTGT	303	231	323	279	276	228	273	243616264704076	-0.13	-0.663865617776918	0.507	0.925	245585956720354	-0.00105	-0.129	0.9138314502294
ACTRT2-3	ACTRT2	x	GAATTTCAGGTGCCCCACGA	81	109	170	150	81	83	112	204921802267018	-0.197	-0.564843501062695	0.572	0.941	207918124604762	-0.0166	-0.18	0.872362705770759
ACTRT2-4	ACTRT2	x	GATCAGGCCACGCTCGAAAG	265	246	348	160	169	198	231	236361197989214	-0.705	-332087681658318	0.000897	0.143	245687190911158	-0.00362	-0.701	0.613442488626902
ACTRT3-1	ACTRT3	x	AATGTTCGGGTAGATAAACT	159	189	115	212	112	177	161	220682587603185	0.114	0.399306013692241	0.69	0.961	218845973629829	-0.00789	0.122	108222464452571
ACTRT3-2	ACTRT3	x	CACTGAGCAACATGATACCA	164	127	148	147	94	111	132	212057393120585	-0.319	-117382717791968	0.24	0.827	216534326552246	-0.0121	-0.307	0.801625329399394
ACTRT3-3	ACTRT3	x	GGCGGGCTAGAACTCTGCGT	67	87	74	78	54	99	76	188081359228079	0.0189	0.0536234037686643	0.957	0.995	188081359228079	-0.0277	0.0466	101318666897679
ACTRT3-4	ACTRT3	x	TGTGGCAATGAACTACGAAG	56	71	42	56	63	29	53	172427586960079	-0.191	-0.437689285356264	0.662	0.957	175076544989401	-0.0352	-0.156	0.875998315067126
ACVR1-1	ACVR1	x	ATTACACTGTTGGAGTGTGT	397	434	296	356	327	314	354	254900326202579	-0.177	-0.98768340268652	0.323	0.867	257480266132644	0.00326	-0.18	0.884540435331541
ACVR1-2	ACVR1	x	CCATGACTTCTCATCACGGG	211	318	258	279	254	198	253	240312052117582	-0.106	-0.493870843287337	0.621	0.95	24188534776394	-0.00227	-0.104	0.929160674250913
ACVR1-3	ACVR1	x	CTGGTGTAACAGGAACATCA	276	278	316	314	357	364	318	250242711998443	0.251	149071194916688	0.136	0.748	246239799789896	0.00142	0.25	119003169630668
ACVR1-4	ACVR1	x	GCCATCGTTGATGCTCAGTG	316	171	182	296	232	303	250	239794000867204	0.313	128656960857019	0.198	0.801	234830486304816	-0.00245	0.315	124228828178444
ACVR1B-1	ACVR1B	x	AAGAGATTATTGGCAAGGGT	173	127	130	107	90	68	116	206445798922692	-0.698	-239687280958897	0.0165	0.443	215634720085992	-0.0156	-0.682	0.616426162731903
ACVR1B-2	ACVR1B	x	ACTTGACTCAGGTCACCTCA	339	283	327	355	366	403	346	253907609879278	0.244	149965588474935	0.134	0.746	250014495770763	0.00286	0.241	118427161185363
ACVR1B-3	ACVR1B	x	CCGGTTCAGATAATCAAACA	205	225	203	218	257	208	219	234044411484012	0.11	0.549818490264973	0.582	0.943	232428245529769	-0.00429	0.114	107922823650443
ACVR1B-4	ACVR1B	x	CTACACGTGTGAGACAGATG	46	69	58	46	40	57	53	172427586960079	-0.275	-0.683025688481734	0.495	0.921	176092484840913	-0.0352	-0.24	0.826450318154212
ACVR1C-1	ACVR1C	x	ATTGTCCTTTGAACCAACAG	182	260	258	208	179	261	225	235218251811136	-0.111	-0.492857590266531	0.622	0.95	236797678529459	-0.00396	-0.107	0.925946022527324
ACVR1C-2	ACVR1C	x	CCAAGATCTTTCATCTCTGG	245	389	202	254	321	308	286	245636603312904	0.0789	0.341178666274686	0.733	0.968	244508502271935	-0.000293	0.0792	105621241174897
ACVR1C-3	ACVR1C	x	CTGGCGCTCTCAATTGCTAG	364	320	298	308	304	406	333	252244423350632	0.0519	0.288496303952437	0.773	0.973	251499023306729	0.0022	0.0497	103662924486557
ACVR1C-4	ACVR1C	x	TGTAGGAGCACTGTCGACCC	129	94	60	79	78	92	89	194939000664491	-0.185	-0.535654965469069	0.592	0.944	197466518080463	-0.0237	-0.161	0.879649075922436
ACVR2A-1	ACVR2A	x	AGTGGTTTCAAACCTAGTAA	276	220	225	189	251	311	245	238916608436453	0.0588	0.267359383357734	0.789	0.976	238081400999977	-0.00277	0.0616	10415990227138
ACVR2A-2	ACVR2A	x	ATTGCAGAAACCATGGCTAG	204	132	98	191	183	172	163	221218760440396	0.331	120426338978974	0.228	0.821	216036847479285	-0.00774	0.339	125788497183602
ACVR2A-3	ACVR2A	x	CCAAAGATCCACATCAACAC	180	197	173	197	200	213	193	228555730900777	0.149	0.725723886501303	0.468	0.915	226324143477458	-0.00584	0.155	110880064360307
ACVR2A-4	ACVR2A	x	CCAGTTGCTTAACGAATATG	341	263	409	239	296	277	304	248287358360875	-0.319	-161300707055841	0.107	0.714	252848819064062	0.00069	-0.32	0.801625329399394
ACVR2B-1	ACVR2B	x	ACAAGCCGTCTATTGCCCAC	318	208	156	213	240	214	225	235218251811136	-0.0321	-0.129065137576253	0.897	0.988	235666311993682	-0.00396	-0.0281	0.97799568160295
ACVR2B-2	ACVR2B	x	ATGACTTCAACTGCTACGAT	311	272	368	201	232	219	267	242651126136458	-0.545	-28502118677454	0.00437	0.282	250105926221775	-0.00141	-0.544	0.685391402489852
ACVR2B-3	ACVR2B	x	ATGTCCACATGACCGTAGGG	248	122	193	197	216	106	180	225527250510331	-0.117	-0.387380555955007	0.698	0.963	227338714013168	-0.00673	-0.11	0.922103117912631
ACVR2B-4	ACVR2B	x	CTGGAGCGCACCAACCAGAG	134	97	84	75	91	100	97	198677173426624	-0.244	-0.781515161422935	0.434	0.906	202118929906994	-0.021	-0.223	0.844400887423782
ACVRL1-1	ACVRL1	x	AGGCACCCCCAGGAACATCG	125	101	206	190	176	196	166	222010808804005	0.38	138404661880649	0.166	0.777	215836249209525	-0.00753	0.388	130134185544193
ACVRL1-2	ACVRL1	x	CCAGGACTGTTCATCCCTCG	173	329	185	301	218	194	233	236735592102602	0.0536	0.203806253541871	0.839	0.981	235983548233989	-0.0035	0.0571	103785147711818
ACVRL1-3	ACVRL1	x	CTGCGTGCTCGAGTTGCGGG	142	180	149	195	120	131	153	21846914308176	-0.0787	-0.299055229100637	0.765	0.973	219589965240923	-0.00869	-0.07	0.946910515271733
ACVRL1-4	ACVRL1	x	TGGACAGTGACTGCACCACA	283	220	120	119	100	230	179	225285303097989	-0.473	-141318894545783	0.158	0.768	231736679193951	-0.00679	-0.466	0.720464874418961
ACY1-1	ACY1	x	AGGCACAAAGGTCATGTGGA	311	256	324	313	351	303	310	249136169383427	0.118	0.673409853438032	0.501	0.923	247275644931721	0.00101	0.117	108522937188181
ACY1-2	ACY1	x	CCATGCCTCACGCTTCATGG	195	259	182	179	205	204	204	23096301674259	-0.113	-0.517192247430998	0.605	0.947	232633586092875	-0.00513	-0.108	0.9246632781137
ACY1-3	ACY1	x	GCTGGACAGTGCGGATACGC	235	243	241	179	194	201	216	233445375115093	-0.325	-167050796975098	0.0948	0.695	237960763566322	-0.00445	-0.321	0.79829838635665
ACY1-4	ACY1	x	TAGCTTAGTCAGGTTCACGG	245	315	228	259	224	222	249	239619934709574	-0.161	-0.801019608735624	0.423	0.902	241940496276989	-0.00252	-0.158	0.894404901782606
ACY3-1	ACY3	x	CACCTCATATGGGTCGTCCG	1	14	4	3	1	2	4	0.602059991327962	-1.66	-111331076383293	0.266	NA	0.801632346233166	-0.0659	-1.59	0.31643914849257
ACY3-2	ACY3	x	CTTCCTGTACCAGCGGTCTG	161	95	206	220	198	199	180	225527250510331	0.417	154931999538623	0.121	0.733	218752072083646	-0.00673	0.424	133514830329591
ACY3-3	ACY3	x	GTGCATGGCAAAGACTTCGT	62	69	50	68	69	107	71	185125834871908	0.431	119405974572407	0.232	0.823	178055732014952	-0.0291	0.46	134816773173706
ACY3-4	ACY3	x	TGAGGTCATGGTCCACGTAG	109	104	82	68	122	67	92	196378782734556	-0.199	-0.588308456908663	0.556	0.938	19927007612585	-0.0227	-0.176	0.871154192142256
ACYP1-1	ACYP1	x	ACAGTGCAAGGACAATTGCA	329	423	498	334	599	444	438	26414741105041	0.14	0.676978435574513	0.498	0.922	261978875828839	0.00693	0.133	110190511587661
ACYP1-2	ACYP1	x	TAGGCTGAGGGTAAAAAGCT	126	63	128	202	179	92	132	212057393120585	0.577	168356802305662	0.0923	0.691	202393800749809	-0.0121	0.589	149174402669147
ACYP1-3	ACYP1	x	TGGGTCCAGAACACTGACCG	150	106	140	105	118	122	124	209342168516224	-0.199	-0.742700840641986	0.458	0.913	212057393120585	-0.0138	-0.185	0.871154192142256
ACYP1-4	ACYP1	x	TTCCTGCATATGACGCACCT	1	4	2	1	1	2	2	0.301029995663981	-0.807	-0.411010193830333	0.681	NA	0.367976785294594	-0.0515	-0.756	0.571569167707018
ACYP2-1	ACYP2	x	ACCAGCAAAGGCACCGTGAC	274	173	330	241	137	196	225	235218251811136	-0.437	-164925832915015	0.0991	0.703	241329976408125	-0.00396	-0.433	0.73866903179128
ACYP2-2	ACYP2	x	CGCCCAGTCACTCAAATCCG	189	154	152	156	213	125	165	221748394421391	-0.00292	-0.0113628709973922	0.991	0.998	221748394421391	-0.0076	0.00468	0.997978057118862
ACYP2-3	ACYP2	x	GAGGTGTTCGGAAGAGTGCA	277	289	253	164	208	170	227	235602585719312	-0.596	-298097196529753	0.00287	0.241	243616264704076	-0.00385	-0.592	0.66158571995406
ACYP2-4	ACYP2	x	TGAAGCTAGGAAAATAGGAG	233	209	186	248	262	239	230	236172783601759	0.254	130440089329426	0.192	0.797	232083838901753	-0.00368	0.258	119250887233063
ADA-1	ADA	x	CACAGACTGGTCCCCCAAGG	163	248	149	144	150	128	164	22148438480477	-0.408	-158657572712169	0.113	0.722	227106677228654	-0.00767	-0.4	0.753667454779191
ADA-2	ADA	x	TCACCGTACTGTCCACGCCG	459	436	359	389	339	435	403	260530504614111	-0.109	-0.659424462230218	0.51	0.926	262117628177504	0.00551	-0.115	0.927230546435463
ADA-3	ADA	x	TCCCAGCTAACACAGCAGAG	114	104	100	223	157	107	134	212710479836481	0.615	207743830371765	0.0378	0.563	202530586526477	-0.0117	0.627	153155799709438
ADA-4	ADA	x	TGGACATACTCAAGACAGAG	187	197	180	138	244	194	190	227875360095283	0.0304	0.125552201369186	0.9	0.989	227415784926368	-0.00607	0.0365	102129524962519
ADAD1-1	ADAD1	x	AACTGGTGCAAGGCTGACAC	479	435	414	428	543	522	470	267209785793572	0.169	113040410182911	0.258	0.835	264607682031234	0.00814	0.161	112427892377862
ADAD1-2	ADAD1	x	AGGTGAATACAATTACAGCC	148	196	247	199	198	158	191	228103336724773	-0.0907	-0.375476070416075	0.707	0.964	229446622616159	-0.00599	-0.0847	0.939067000506996
ADAD1-3	ADAD1	x	CGATAACTACACCCACAGGA	134	97	155	98	93	127	117	206818586174616	-0.28	-0.962384658679865	0.336	0.873	210946604995209	-0.0154	-0.265	0.823591017267573
ADAD1-4	ADAD1	x	TCAAATGCAGATATAGAATG	203	241	284	300	291	191	252	240140054078154	0.103	0.46369022087353	0.643	0.954	238501012459337	-0.00233	0.105	107400447162012
ADAD2-1	ADAD2	x	ACAGAGATCCCGCGTGCCAG	217	278	258	282	229	361	271	243296929087441	0.212	101248250715786	0.311	0.862	239967372148104	-0.00117	0.213	115829280619464
ADAD2-2	ADAD2	x	CACTGCGAATAGCAAGACGG	103	92	120	96	96	77	97	198677173426624	-0.228	-0.771199564074264	0.441	0.908	202118929906994	-0.021	-0.207	0.853817714391245
ADAD2-3	ADAD2	x	TCACCTACCTACGCTCAGGG	112	56	144	145	122	109	115	206069784035361	0.269	0.799481377383991	0.424	0.902	201703333929878	-0.0158	0.285	120497231499479
ADAD2-4	ADAD2	x	TTCAAATATAGAGCCCCTGG	118	125	97	121	96	126	114	205690485133647	0.0127	0.0457692844309578	0.963	0.996	205435766232259	-0.0161	0.0288	100884182927074
ADAL-1	ADAL	x	ACTAATGGATCCATTCAAGT	255	309	306	203	272	372	286	245636603312904	-0.0387	-0.175799949956686	0.86	0.984	246239799789896	-0.000293	-0.0384	0.97353179335689
ADAL-2	ADAL	x	CAATCACAGTCATCTGATCG	478	524	487	547	396	541	496	26954816764902	-0.00485	-0.0312741867664377	0.975	0.997	269577344303251	0.00907	-0.0139	0.996643880575475
ADAL-3	ADAL	x	GGAGACTGTAAAACTTGCCG	168	161	247	278	179	190	204	23096301674259	0.168	0.67085155319209	0.502	0.923	228330122870355	-0.00513	0.173	112349990303165
ADAL-4	ADAL	x	TATGTGGAATCTATACTTGA	248	305	219	283	256	216	254	240483371661994	-0.0321	-0.158039591347935	0.874	0.985	241049604561607	-0.00221	-0.0299	0.97799568160295
ADAM10-1	ADAM10	x	CCCATAAATACGGTCCTCAG	92	143	82	58	97	98	95	197772360528885	-0.325	-0.950644826793054	0.342	0.875	202393800749809	-0.0217	-0.303	0.79829838635665
ADAM10-2	ADAM10	x	GGAAATGGAATGGTAGAACA	228	208	187	244	296	210	229	235983548233989	0.268	128452336155375	0.199	0.802	231736679193951	-0.00374	0.272	120413738123142
ADAM10-3	ADAM10	x	TTCCATCAATAACAGACCCA	160	211	184	273	264	176	211	232428245529769	0.361	156405165181241	0.118	0.728	226717172840301	-0.00473	0.366	128431580898943
ADAM10-4	ADAM10	x	TTTCAACCTACGAATGAAGA	197	149	122	186	217	149	170	223044892137827	0.238	0.930030880356581	0.352	0.881	219312459835446	-0.00729	0.245	117935659226122
ADAM11-1	ADAM11	x	GCTCATGGTCTACCGACGGG	377	331	284	450	355	337	356	255144999797288	0.203	113159993964274	0.258	0.835	251939041743452	0.00336	0.2	115108949132776
ADAM11-2	ADAM11	x	GCTCCACGTATTGCGAGGAG	241	241	281	238	294	335	272	24345689040342	0.184	0.951003541070123	0.342	0.875	240540328323522	-0.00111	0.185	113602926478669
ADAM11-3	ADAM11	x	GTTCGAGCAGATGCGACAGT	252	185	192	215	230	177	208	231806333496276	-0.0161	-0.0735744964239525	0.941	0.993	232152939072561	-0.0049	-0.0112	0.988902368516412
ADAM11-4	ADAM11	x	TGGGAACTTGACTTACATCG	66	96	121	140	96	71	98	199122607569249	0.117	0.338428907670274	0.735	0.968	197466518080463	-0.0207	0.138	108447740884306
ADAM12-1	ADAM12	x	AAGCAATGGTACTTGCCCGG	180	154	212	183	192	187	185	226717172840301	0.0417	0.189317939772299	0.85	0.982	226007138798507	-0.00643	0.0481	102932601884968
ADAM12-2	ADAM12	x	ACTGAACATTCGGATCGTGT	309	315	247	326	320	429	324	251054501020661	0.304	163170499632215	0.103	0.708	2462896900288	0.00174	0.302	123456260689354
ADAM12-3	ADAM12	x	GGTGATCCTTATGGCAACTG	254	119	225	237	196	146	196	229225607135648	-0.0466	-0.164963234480069	0.869	0.985	229957992926875	-0.00563	-0.041	0.96821543600247
ADAM12-4	ADAM12	x	TGCTGAATATTCGACTACAA	110	115	124	138	139	126	125	209691001300806	0.208	0.820993850695088	0.412	0.899	206570417223952	-0.0136	0.222	115508578455358
ADAM15-1	ADAM15	x	AGTGCCACTCGTACATTCAG	293	319	252	329	270	279	290	246239799789896	0.0232	0.127146527500115	0.899	0.988	245939248775923	-6.75e-05	0.0233	101621100998861
ADAM15-2	ADAM15	x	CTCCAGACAGCTAATACTCG	252	259	285	213	335	158	250	239794000867204	-0.173	-0.7047399973638	0.481	0.918	242379181301801	-0.00245	-0.171	0.88699630515215
ADAM15-3	ADAM15	x	CTGTTGTCAAAATTGCCAGG	291	282	277	240	263	198	258	241161970596323	-0.278	-147516880618122	0.14	0.752	245229767099463	-0.00196	-0.276	0.824733548610081
ADAM15-4	ADAM15	x	TGGATTCGCGAAATAATGGG	173	204	205	146	149	181	176	224551266781415	-0.29	-129790546986941	0.194	0.799	228780172993023	-0.00696	-0.283	0.817902058557781
ADAM17-1	ADAM17	x	AATCAGAATCAACACAGATG	117	87	169	64	117	122	113	205307844348342	-0.3	-0.887080201747788	0.375	0.888	209458757708903	-0.0163	-0.284	0.812252396356236
ADAM17-2	ADAM17	x	ACAAAATTTCAAGGTCGTGG	250	249	249	240	223	291	250	239794000867204	0.0115	0.0605977311342577	0.952	0.994	23967803431448	-0.00245	0.014	100800304711529
ADAM17-3	ADAM17	x	CATCGCTTCTACAGATACAT	338	372	363	263	266	226	305	248429983934679	-0.507	-298030131499593	0.00288	0.241	255347846724629	0.000743	-0.508	0.703684187662699
ADAM17-4	ADAM17	x	TGGTGAAAAGCACTACAACA	146	184	162	170	123	161	158	219865708695442	-0.116	-0.477802188636586	0.633	0.952	22148438480477	-0.00815	-0.108	0.922742492653798
ADAM18-1	ADAM18	x	AAAATCCCATTACCACACAC	282	249	330	276	303	322	294	246834733041216	0.0655	0.360365893870736	0.719	0.966	245788189673399	0.000154	0.0653	104644754803744
ADAM18-2	ADAM18	x	AGTAAGTATGCTATGTCATG	148	179	153	162	146	151	156	219312459835446	-0.0645	-0.279780700847093	0.78	0.975	220411998265593	-0.00835	-0.0562	0.956276680412056
ADAM18-3	ADAM18	x	AGTGCCTGCTATTGACAACT	192	184	189	194	155	171	181	225767857486918	-0.12	-0.554841793085659	0.579	0.942	227492719309978	-0.00668	-0.113	0.920187650624875
ADAM18-4	ADAM18	x	TATAACAGTCAATTTGAACT	68	106	98	119	90	135	103	201283722470517	0.339	109524275365377	0.273	0.845	195744764931454	-0.0192	0.358	126487954235394
ADAM19-1	ADAM19	x	ATGCCTCTAATTGTACCCTG	435	425	443	385	418	394	417	262013605497376	-0.122	-0.85915954069233	0.39	0.892	263782316099292	0.00609	-0.128	0.91891288347905
ADAM19-2	ADAM19	x	CCTCTAAATAATCAGCCACG	182	209	205	233	175	108	185	226717172840301	-0.208	-0.777706138031234	0.437	0.906	229812500502057	-0.00643	-0.202	0.865736565519658
ADAM19-3	ADAM19	x	GTCACGCTCAGCACTTGCCG	132	173	184	214	118	213	172	223552844690755	0.156	0.578105122424243	0.563	0.939	221218760440396	-0.00718	0.163	111419365081933
ADAM19-4	ADAM19	x	TGCCCAGAGATGCGAAGTGT	231	111	134	215	183	173	174	22405492482826	0.263	0.945920593193103	0.344	0.876	220048569800083	-0.00707	0.27	119997138237322
ADAM20-1	ADAM20	x	AATGTGACTGTGGAACCATA	566	591	569	589	602	516	572	275739602879302	-0.016	-0.124538286573073	0.901	0.989	275991953665953	0.0115	-0.0275	0.988970916380931
ADAM20-2	ADAM20	x	AGAGATACATTGTCCACATG	686	633	583	645	560	576	614	278816837114117	-0.0948	-0.736073158440052	0.462	0.913	280208925788173	0.0127	-0.108	0.936402051325314
ADAM20-3	ADAM20	x	GGTGTGTGTGCGAGCTACAG	310	365	370	261	397	239	324	251054501020661	-0.22	-107437981535088	0.283	0.849	254199503572741	0.00174	-0.222	0.858565436437754
ADAM20-4	ADAM20	x	TAAGGGCAACCAAGGACTCA	467	502	430	400	405	478	447	265030752313194	-0.125	-0.840982820603457	0.4	0.896	266869645977216	0.00728	-0.132	0.917004043204671
ADAM2-1	ADAM2	x	ATGTGTGATGCAAACTATGC	399	280	257	282	265	323	301	247856649559384	-0.105	-0.523726902940026	0.6	0.946	249415459401844	0.000532	-0.106	0.929804942613162
ADAM21-1	ADAM21	x	ATATTCCTGCAACATAGGCT	837	739	672	743	882	721	766	28842287696326	0.0616	0.478491914955329	0.632	0.952	287467505217736	0.0166	0.045	104362253369836
ADAM21-2	ADAM21	x	GAAACACGTTGTTCATATGA	1	1	2	1	4	2	2	0.301029995663981	0.807	0.411011856001697	0.681	NA	0.1249387366083	-0.0515	0.858	174956952981164
ADAM21-3	ADAM21	x	GCATAATCCTCCAAGATTGG	626	581	511	421	400	522	510	270757017609794	-0.355	-234715332539526	0.0189	0.464	275790190477556	0.00954	-0.365	0.781869643128594
ADAM21-4	ADAM21	x	TGGGTTCAATTTCATAAGTG	200	155	181	176	200	133	174	22405492482826	-0.0746	-0.310786846893083	0.756	0.972	225204353497311	-0.00707	-0.0675	0.949605370968844
ADAM2-2	ADAM2	x	CTTTAAATTACAAAGCGTAG	179	229	111	195	170	179	177	224797326636181	0.0679	0.25496898016032	0.799	0.976	22380461031288	-0.0069	0.0748	104818981801714
ADAM22-1	ADAM22	x	ATAGGTATTGGTATGTACAA	216	261	180	190	187	218	209	232014628611105	-0.143	-0.659428061173637	0.51	0.926	234044411484012	-0.00484	-0.138	0.905633983017823
ADAM22-2	ADAM22	x	CTTAGGTGAATGTAAATGCG	166	92	86	143	74	84	108	203342375548695	-0.193	-0.545530603003891	0.585	0.944	205943718785187	-0.0177	-0.175	0.874784764905822
ADAM22-3	ADAM22	x	TACTACCAGGGCCATATCCG	264	221	236	169	264	187	224	235024801833416	-0.218	-0.984008664494298	0.325	0.868	238081400999977	-0.00402	-0.214	0.859756486243006
ADAM22-4	ADAM22	x	TGTATTTCATAAACTCACGT	123	91	182	133	118	161	135	213033376849501	0.0571	0.193146089805897	0.847	0.982	212057393120585	-0.0115	0.0686	104037237714079
ADAM2-3	ADAM2	x	GACCTCCCTGAATATTGCAA	423	318	412	392	353	397	382	258206336291171	-0.0138	-0.0835409351948173	0.933	0.993	258470805257504	0.00458	-0.0184	0.990480172123622
ADAM23-1	ADAM23	x	ACATATAATCCAGAAAACCT	258	272	239	257	181	193	233	236735592102602	-0.285	-138187454380607	0.167	0.777	240880508508177	-0.0035	-0.282	0.820741608810498
ADAM23-2	ADAM23	x	AGGCGTCAAAGACTCCAAGG	85	104	179	153	160	142	137	213672056715641	0.306	10306645380574	0.303	0.859	208872656395386	-0.0112	0.317	123627526092095
ADAM23-3	ADAM23	x	ATATTACATCAACCAAGACT	321	353	325	309	241	407	326	251321760006794	-0.062	-0.312857576036754	0.754	0.971	252244423350632	0.00184	-0.0638	0.957935218222696
ADAM23-4	ADAM23	x	GGATACTTACAGAATCCACA	106	153	141	89	168	112	128	210720996964787	-0.116	-0.388819093522886	0.697	0.963	21249387366083	-0.0129	-0.103	0.922742492653798
ADAM2-4	ADAM2	x	TTGAAAAAAGGATCTAAGCG	172	149	198	143	246	161	178	225042000230889	0.0837	0.32634197777606	0.744	0.97	22380461031288	-0.00685	0.0905	105973239532728
ADAM28-1	ADAM28	x	CATACTACTAGTTTGGTGGC	232	203	225	327	269	186	240	238021124171161	0.245	108894234232574	0.276	0.846	234242268082221	-0.00308	0.248	118509277094158
ADAM28-2	ADAM28	x	TAAAAAGCTCAATACTCATG	280	274	225	236	198	212	238	237657695705651	-0.27	-137680531928859	0.169	0.779	24144162029529	-0.0032	-0.267	0.829319545814442
ADAM28-3	ADAM28	x	TAGGCAATGGAGCATTAAAG	202	305	201	233	239	255	239	237839790094814	0.0382	0.176891861548404	0.86	0.984	237291200297011	-0.00314	0.0413	102683188497876
ADAM28-4	ADAM28	x	TTAAGCCCCATACATCGGGA	311	290	196	248	240	267	259	241329976408125	-0.0781	-0.373501861176147	0.709	0.964	242433706667645	-0.0019	-0.0762	0.947304406185711
ADAM29-1	ADAM29	x	ACTGCAAGTTCCTACCATCA	514	387	487	435	365	419	434	263748972951251	-0.187	-117254803863612	0.241	0.828	266526821139917	0.00678	-0.194	0.878430468238362
ADAM29-2	ADAM29	x	AGTCGGAGAACATTACGCCC	244	245	214	343	232	353	272	24345689040342	0.401	195773246774426	0.0503	0.605	236983407030016	-0.00111	0.402	1320422841015
ADAM29-3	ADAM29	x	GTATACCAGATGTTCAAACG	182	120	161	157	91	107	136	213353890837022	-0.383	-133078657516667	0.183	0.79	218845973629829	-0.0114	-0.372	0.766841329836546
ADAM29-4	ADAM29	x	TTTGGGCATGAACCATGATG	212	270	251	283	289	260	261	241664050733828	0.183	0.981482755580654	0.326	0.869	238798271992147	-0.00177	0.185	113524210214606
ADAM30-1	ADAM30	x	AATACTGCCAATGTAGGGGT	149	138	169	146	128	130	143	215533603746506	-0.175	-0.723666961542424	0.469	0.916	218184358794477	-0.0101	-0.165	0.885767519102361
ADAM30-2	ADAM30	x	ATGTGGAAACAAAATTGTGG	167	159	197	100	156	121	150	217609125905568	-0.472	-184456844536731	0.0651	0.643	224138043414761	-0.00909	-0.463	0.720964435730112
ADAM30-3	ADAM30	x	CCAAAGGACTGCAACTACAT	132	108	122	56	104	71	99	199563519459755	-0.648	-203927181637569	0.0414	0.58	20815873158135	-0.0204	-0.628	0.638164384414476
ADAM30-4	ADAM30	x	CCCCTTATGAGAATAAGGCG	36	66	60	42	58	37	50	169897000433602	-0.242	-0.559816764089359	0.576	0.941	173239375982297	-0.0364	-0.206	0.845572287377517
ADAM32-1	ADAM32	x	AAATCTCCGAAACCAGTCTG	148	167	93	124	148	107	131	211727129565576	-0.106	-0.368218429525868	0.713	0.965	213353890837022	-0.0123	-0.0937	0.929160674250913
ADAM32-2	ADAM32	x	AACACTGCTCCCAAATAACG	278	166	283	267	208	256	243	238560627359831	0.00792	0.0343090240931314	0.973	0.997	238441315613938	-0.00289	0.0108	100550482182594
ADAM32-3	ADAM32	x	AAGCCTGAAAGAACAACCAA	252	196	210	291	184	263	233	236735592102602	0.166	0.745800411598246	0.456	0.912	234110463889429	-0.0035	0.17	112194348053048
ADAM32-4	ADAM32	x	TACAATCAGGCGTTGAATGT	179	126	73	138	136	74	121	208278537031645	-0.119	-0.340163280239152	0.734	0.968	210037054511756	-0.0144	-0.105	0.92082569720504
ADAM33-1	ADAM33	x	CACAGGGTGAGCCGTCCAGT	98	126	141	82	186	116	125	209691001300806	0.0732	0.228248790938191	0.819	0.979	208517160973681	-0.0136	0.0868	105204761386262
ADAM33-2	ADAM33	x	CCCCCCACCCGCGTACCCGG	121	144	193	182	164	161	161	220682587603185	0.147	0.590387843921618	0.555	0.938	218374422328421	-0.00789	0.155	110726458448428
ADAM33-3	ADAM33	x	CTCCATCCGAAAGATCTCGT	228	274	305	240	200	227	246	239093510710338	-0.275	-13902812203345	0.164	0.775	242975228000241	-0.0027	-0.272	0.826450318154212
ADAM33-4	ADAM33	x	GTGGGTTTCTATGTATCCTG	100	121	105	118	91	95	105	202118929906994	-0.101	-0.355020944233384	0.723	0.966	203609634534828	-0.0186	-0.0824	0.932386486436833
ADAM7-1	ADAM7	x	AAAGATCCTTAAAACACGGA	461	487	451	399	423	292	419	26222140229663	-0.329	-196839064710926	0.049	0.603	266869645977216	0.00617	-0.335	0.79608809877878
ADAM7-2	ADAM7	x	ACAGAATGGCACATCAACTG	444	443	454	433	581	441	466	266838591669	0.118	0.761275171856437	0.446	0.909	265030752313194	0.00799	0.11	108522937188181
ADAM7-3	ADAM7	x	CATTTGCAAATACCTGAGCA	409	506	391	340	314	400	393	259439255037543	-0.309	-183863933170105	0.066	0.646	263882192221939	0.00508	-0.314	0.807201074504765
ADAM7-4	ADAM7	x	CCATAAGATACCATGATCTG	237	352	264	279	274	375	297	247275644931721	0.122	0.590423112762347	0.555	0.938	245382777644786	0.000318	0.122	10882424416708
ADAM8-1	ADAM8	x	AGTCCGGGTACCCCTCTACG	586	551	632	582	760	670	630	279934054945358	0.186	136841355881746	0.171	0.781	277060657819006	0.0132	0.173	11376052278725
ADAM8-2	ADAM8	x	CAAACAGGTTCCCACACACG	231	167	197	168	153	135	175	224303804868629	-0.384	-165964516734221	0.097	0.7	229739571100889	-0.00701	-0.377	0.766309980103892
ADAM8-3	ADAM8	x	CCACATACAGCTCCACGTAG	329	196	182	269	216	243	239	237839790094814	0.0422	0.176369318658597	0.86	0.984	237229815907724	-0.00314	0.0453	102968281788859
ADAM8-4	ADAM8	x	CCAGCTTAGACTCACCAAGT	108	68	81	118	112	59	91	195904139232109	0.169	0.481061976681221	0.63	0.952	193281186861163	-0.023	0.192	112427892377862
ADAM9-1	ADAM9	x	AAAAGTTTCTTATCACACGT	237	241	206	235	299	285	250	239794000867204	0.26	135018300621228	0.177	0.786	235793484700045	-0.00245	0.262	119747870461893
ADAM9-2	ADAM9	x	GAATTGGACCCTTGCTGCGA	167	208	148	133	173	170	166	222010808804005	-0.136	-0.563070385530314	0.573	0.941	224138043414761	-0.00753	-0.128	0.910038824080899
ADAM9-3	ADAM9	x	GCTGTTCATTGTCGTAGACA	137	122	160	85	117	145	128	210720996964787	-0.272	-0.964249410766697	0.335	0.873	214509276824663	-0.0129	-0.259	0.828170661334546
ADAM9-4	ADAM9	x	TGTGGTTTATACTTACAACA	66	33	86	41	32	59	53	172427586960079	-0.487	-106078081831526	0.289	0.853	179005047368335	-0.0352	-0.452	0.713507252858939
ADAMDEC1-1	ADAMDEC1	x	AATGTCTTACCACATTGAGT	228	195	235	203	135	146	190	227875360095283	-0.443	-191164970589581	0.0559	0.623	234110463889429	-0.00607	-0.437	0.735603372927869
ADAMDEC1-2	ADAMDEC1	x	CGTCTTTACATCTAACCAGG	96	63	87	90	72	96	84	192427928606188	0.0687	0.210308078792239	0.833	0.981	191381385238372	-0.0253	0.094	104877121905447
ADAMDEC1-3	ADAMDEC1	x	GATGGCACAGTTCTAACCTG	409	393	430	389	412	419	409	261172330800734	-0.0141	-0.0975690646422242	0.922	0.992	261348945310874	0.00576	-0.0199	0.990274228975089
ADAMDEC1-4	ADAMDEC1	x	TGATGTGTGAAGTATCCTCT	168	172	324	177	229	201	212	232633586092875	-0.129	-0.491441791261379	0.623	0.95	234504682464835	-0.00467	-0.124	0.914465089499901
ADAMTS10-1	ADAMTS10	x	ATCGCGTCAGTGTAAATACG	253	277	304	396	281	243	292	246538285144842	0.142	0.686279163952391	0.493	0.921	244404479591808	4.38e-05	0.142	110343374004196
ADAMTS10-2	ADAMTS10	x	GGCATGAACCATGACGGCGT	61	68	65	91	74	72	72	185733249643127	0.289	0.862306848313405	0.389	0.892	181068047521056	-0.0288	0.318	12217931016735
ADAMTS10-3	ADAMTS10	x	TACAAGTGGAAAACGTACCG	119	89	52	104	90	122	96	198227123303957	0.281	0.818327601424093	0.413	0.9	193785209325116	-0.0214	0.302	121503679190502
ADAMTS10-4	ADAMTS10	x	TGCCATTCCAGAGAACGGTG	70	67	103	38	48	80	68	183250891270624	-0.532	-134421689979754	0.179	0.788	190308998699194	-0.0299	-0.502	0.691595314505482
ADAMTS1-1	ADAMTS1	x	CTATGTGGAAACCATGCTTG	280	204	213	154	184	206	207	231597034545692	-0.358	-160798442913632	0.108	0.714	236611152337835	-0.00495	-0.353	0.780245480173703
ADAMTS1-2	ADAMTS1	x	GAAAGCGGAGACCGAAGACG	225	227	251	226	144	241	219	234044411484012	-0.202	-0.888250868324031	0.374	0.888	236983407030016	-0.00429	-0.198	0.869344560090022
ADAMTS12-1	ADAMTS12	x	AACATCATAGATCACTCCGG	171	167	124	162	141	134	150	217609125905568	-0.0803	-0.324637123436464	0.745	0.97	218752072083646	-0.00909	-0.0712	0.945860940021167
ADAMTS12-2	ADAMTS12	x	AATGCCACCGAGGATCGCTG	149	185	213	131	136	166	163	221218760440396	-0.337	-139119696320199	0.164	0.775	226086607161377	-0.00774	-0.329	0.791685865871272
ADAMTS12-3	ADAMTS12	x	GTACTACAGAATTTCTCACG	166	181	131	106	133	121	140	214612803567824	-0.409	-160364700899472	0.109	0.716	220230664189246	-0.0106	-0.398	0.753145233316906
ADAMTS12-4	ADAMTS12	x	TTGGTGCCTCTGAGCGACAG	123	118	146	155	158	151	142	215228834438306	0.262	108435095020935	0.278	0.847	211058971029925	-0.0103	0.272	119913991379111
ADAMTS1-3	ADAMTS1	x	GAGGAGTCCAGTACACGATG	236	259	239	236	221	166	226	23541084391474	-0.237	-114315349568573	0.253	0.833	238857480519641	-0.00391	-0.233	0.848507901705896
ADAMTS13-1	ADAMTS13	x	AGCACCACACTCACTAGGGA	395	469	440	374	362	476	419	26222140229663	-0.106	-0.653112507232631	0.514	0.927	263815633667624	0.00617	-0.112	0.929160674250913
ADAMTS13-2	ADAMTS13	x	CATGGGCGCTGGTCTAGCTG	81	61	83	32	88	82	71	185125834871908	-0.156	-0.380902470715652	0.703	0.963	18750612633917	-0.0291	-0.127	0.897510050667261
ADAMTS13-3	ADAMTS13	x	GGCAACTCCAGGTCAAACCT	247	266	274	216	258	233	249	239619934709574	-0.155	-0.832333126690694	0.405	0.897	24188534776394	-0.00252	-0.152	0.898132372883934
ADAMTS13-4	ADAMTS13	x	TGGTCGTGTCGAGTACAGAG	364	287	305	244	386	257	307	248713837547719	-0.108	-0.52342755620481	0.601	0.946	250333663755644	0.000848	-0.109	0.927873476471283
ADAMTS1-4	ADAMTS1	x	GTAATCATGTAGGCACTGCA	2	11	7	18	7	2	8	0.903089986991944	0.433	0.383787094515799	0.701	NA	0.823908740944319	-0.0672	0.5	135003798512275
ADAMTS14-1	ADAMTS14	x	CAGACCTGGTACTCGAACAT	127	93	63	219	66	82	108	203342375548695	0.375	0.904024203572298	0.366	0.885	197466518080463	-0.0177	0.393	129683955465101
ADAMTS14-2	ADAMTS14	x	CAGGAGTGTGTGTACACTGG	126	211	132	114	132	122	140	214612803567824	-0.35	-127127532859262	0.204	0.806	219405158799542	-0.0106	-0.339	0.784584097896751
ADAMTS14-3	ADAMTS14	x	GGTCTCATGAGCTATCACGA	109	147	133	112	116	176	132	212057393120585	0.0546	0.195642229999433	0.845	0.982	211282834660605	-0.0121	0.0667	103857111032043
ADAMTS14-4	ADAMTS14	x	TGACCTTTGAAGCACCACTG	170	119	111	106	126	152	131	211727129565576	-0.0589	-0.210757723436884	0.833	0.981	21249387366083	-0.0123	-0.0466	0.959995800571048
ADAMTS15-1	ADAMTS15	x	AGCGTTTCGTGTCTATCCCG	350	362	436	376	435	375	389	258994960132571	0.047	0.292645937161261	0.77	0.973	258282063334229	0.0049	0.0421	103311438768413
ADAMTS15-2	ADAMTS15	x	CAACCCCATCAACATCGTTG	516	614	671	862	686	759	685	283569057149243	0.357	259189196743256	0.00954	0.378	277839245809987	0.0146	0.342	128075986132977
ADAMTS15-3	ADAMTS15	x	CATGGGGCATGTTGAACACG	470	567	499	518	536	577	528	272263392253381	0.0866	0.63429966888691	0.526	0.929	270926996097583	0.0101	0.0765	106186473425884
ADAMTS15-4	ADAMTS15	x	GCGACGCTGCTTCTATTCTG	491	589	521	518	495	465	513	271011736511182	-0.115	-0.838475649475984	0.402	0.896	272727007719964	0.00964	-0.125	0.923382310729395
ADAMTS16-1	ADAMTS16	x	AAGAAGACCAGTCCGACCAG	366	363	438	416	463	364	402	260422605308447	0.091	0.56403663274214	0.573	0.941	258994960132571	0.00547	0.0855	106510820339342
ADAMTS16-2	ADAMTS16	x	AGATGGGACTCCATGCTCGG	218	252	242	228	342	245	254	240483371661994	0.195	0.940630684267262	0.347	0.878	237535873891719	-0.00221	0.197	114472416059868
ADAMTS16-3	ADAMTS16	x	GGGACACGTAATCGCCCCTG	131	153	133	131	125	145	136	213353890837022	-0.0564	-0.229686907486302	0.818	0.979	214301480025409	-0.0114	-0.045	0.961660788712992
ADAMTS16-4	ADAMTS16	x	GTTGAGTATCGTGAGCACGT	185	191	109	127	159	165	156	219312459835446	-0.105	-0.387940736422048	0.698	0.963	22086204838826	-0.00835	-0.0966	0.929804942613162
ADAMTS17-1	ADAMTS17	x	AGAAAAGAAGAAGCCGACGT	401	428	404	439	366	411	408	261066016308988	-0.02	-0.13411474373805	0.893	0.988	261384182187607	0.00572	-0.0257	0.986232704493359
ADAMTS17-2	ADAMTS17	x	AGTAGAAGCACAGCTCGGCG	378	400	332	390	421	352	379	257863920996807	0.0673	0.422862682947348	0.672	0.958	256820172406699	0.00445	0.0628	104775397876341
ADAMTS17-3	ADAMTS17	x	GAGACTGATCTCTGCGTGCA	620	521	436	484	561	452	512	270926996097583	-0.0751	-0.472565595163217	0.637	0.953	272071043860924	0.00961	-0.0847	0.949276319849586
ADAMTS17-4	ADAMTS17	x	GCATGTGCAGCCGAACATGT	429	457	433	399	359	437	419	26222140229663	-0.142	-0.959129707822331	0.337	0.874	26431235408267	0.00617	-0.148	0.906261938267334
ADAMTS18-1	ADAMTS18	x	AGGCCAGTGCGTAAAGTTTG	390	520	419	466	519	499	469	267117284271508	0.159	104424972961036	0.296	0.857	264640372622307	0.00811	0.151	111651296198257
ADAMTS18-2	ADAMTS18	x	CCGAAGTTGTACCATCAATG	551	513	493	455	575	484	512	270926996097583	-0.0404	-0.283505839182658	0.777	0.974	271516735784846	0.00961	-0.05	0.972385307580248
ADAMTS18-3	ADAMTS18	x	GTGACTGCTCAAAATCGCCG	212	209	264	181	196	167	205	231175386105575	-0.332	-158244907187439	0.114	0.723	235856931677276	-0.00507	-0.327	0.794434400096105
ADAMTS18-4	ADAMTS18	x	TATTGGAAGTGACATAAACG	240	422	309	362	322	280	322	250785587169583	-0.0104	-0.0496830306115804	0.96	0.995	251009797518834	0.00163	-0.012	0.992817189898952
ADAMTS19-1	ADAMTS19	x	ATGCAGCTATACTTATAACA	108	101	198	207	153	186	159	220139712432045	0.424	147705971252694	0.14	0.752	213247315450556	-0.00806	0.432	134164222488226
ADAMTS19-2	ADAMTS19	x	CCACTGAAGTATATGCTTTG	189	196	179	203	180	157	184	226481782300954	-0.0627	-0.28939604465906	0.772	0.973	227415784926368	-0.00649	-0.0562	0.957470537896994
ADAMTS19-3	ADAMTS19	x	GACCATCAGCACACGATGGG	757	758	839	750	626	799	755	287794695162919	-0.114	-0.911616743891517	0.362	0.883	289468520378775	0.0163	-0.13	0.924022572446823
ADAMTS19-4	ADAMTS19	x	TCTGCCTATATACACGGTGT	401	326	440	392	359	372	382	258206336291171	-0.0554	-0.338392935851134	0.735	0.968	258994960132571	0.00458	-0.06	0.962327592247141
ADAMTS20-1	ADAMTS20	x	AGTGAATGTTCATCCCAATG	126	121	134	118	96	76	112	204921802267018	-0.394	-138900498486134	0.165	0.776	210380372095596	-0.0166	-0.377	0.761016690419679
ADAMTS20-2	ADAMTS20	x	GCCTCCGCATAAGCTGACGA	157	132	90	99	125	157	127	210380372095596	0.00759	0.0255606969638416	0.98	0.998	210151795524841	-0.0131	0.0207	100527485039396
ADAMTS20-3	ADAMTS20	x	GGCTGCTAGTGAATGGAGCG	197	277	220	261	281	236	245	238916608436453	0.165	0.816799700868269	0.414	0.9	236423821573519	-0.00277	0.168	112116607802851
ADAMTS20-4	ADAMTS20	x	GTGGCATTCCCTCTAATGTG	91	66	37	48	126	49	70	184509804001426	0.201	0.438303128571033	0.661	0.957	181068047521056	-0.0293	0.23	114949484803468
ADAMTS2-1	ADAMTS2	x	AGCACGCCAACAGCTCGAGG	550	629	614	506	594	677	595	277451696572855	-0.0129	-0.0918567430652486	0.927	0.992	277645903484252	0.0122	-0.0251	0.991098258579613
ADAMTS2-2	ADAMTS2	x	CCTGACATCCTCAAACGGGA	454	467	433	454	537	434	463	266558099101795	0.0737	0.507652634082724	0.612	0.948	265449740962946	0.00788	0.0658	105241228897104
ADAMTS2-3	ADAMTS2	x	CGTGATCGTGGTATTCATCG	362	460	386	327	282	346	360	255630250076729	-0.339	-201067652277409	0.0444	0.587	260494567956545	0.00355	-0.343	0.790589116603944
ADAMTS2-4	ADAMTS2	x	GAGCTTCCCCGGAGGCAACG	487	445	356	481	375	426	428	263144376901317	-0.00674	-0.0404233044735026	0.968	0.996	263279460830413	0.00654	-0.0133	0.995339083942163
ADAMTS3-1	ADAMTS3	x	CCACATTTATATGCACTCCG	102	80	102	118	88	105	99	199563519459755	0.131	0.44384997144966	0.657	0.957	197619708532738	-0.0204	0.151	109505247079357
ADAMTS3-2	ADAMTS3	x	TGGCTATAAAATGTGCACCG	117	87	116	104	91	53	95	197772360528885	-0.368	-11028690516345	0.27	0.843	202802872360024	-0.0217	-0.346	0.774855930959171
ADAMTS3-3	ADAMTS3	x	TGTGGTGATGAGACTGCTAT	62	159	125	99	126	161	122	208635983067475	0.158	0.463079498768404	0.643	0.955	206195484407311	-0.0142	0.172	111573932232496
ADAMTS3-4	ADAMTS3	x	TGTGTTAATCCAAGAAGACG	50	121	120	84	136	104	102	200860017176192	0.155	0.429733171442232	0.667	0.958	198677173426624	-0.0195	0.174	111342161822869
ADAMTS4-1	ADAMTS4	x	AGCGCTTTAGCCCCGCACCG	301	291	446	274	236	215	294	246834733041216	-0.518	-249954217729394	0.0124	0.411	253907609879278	0.000154	-0.518	0.698339266233699
ADAMTS4-2	ADAMTS4	x	AGGGGCCATGACATGGCGAG	153	151	168	138	167	201	163	221218760440396	0.1	0.421572169536319	0.673	0.958	219682074391443	-0.00774	0.108	107177346253629
ADAMTS4-3	ADAMTS4	x	CATACCCAGCGTGTCGCAAG	168	191	220	225	193	309	218	23384564936046	0.328	143034081678459	0.153	0.764	228555730900777	-0.00434	0.332	125527199128264
ADAMTS4-4	ADAMTS4	x	CCAGACCAAACACTCGCCCT	168	135	115	172	82	143	136	213353890837022	-0.0744	-0.245238593625091	0.806	0.978	214405502705537	-0.0114	-0.063	0.949737023351187
ADAMTS5-1	ADAMTS5	x	AACATCGACCAACTCTACTC	452	482	580	602	487	507	518	271432975974523	0.0761	0.507021463071621	0.612	0.948	270300462044439	0.00981	0.0663	105416448987281
ADAMTS5-2	ADAMTS5	x	CTGCACGTCTACACCCGCGA	319	338	368	341	402	303	345	253781909507327	0.0293	0.171586483142667	0.864	0.984	253360261067211	0.00281	0.0265	102051684769873
ADAMTS5-3	ADAMTS5	x	CTGCTTCTATCGGGGCACAG	68	106	131	86	152	68	102	200860017176192	0.00472	0.013018131452321	0.99	0.998	200717858462712	-0.0195	0.0242	100327701239571
ADAMTS5-4	ADAMTS5	x	TGTGCTGTGATTGAAGACGA	276	249	256	190	254	298	254	240483371661994	-0.0739	-0.357993730286614	0.72	0.966	241552977915764	-0.00221	-0.0717	0.950066234165784
ADAMTS6-1	ADAMTS6	x	AGCATCATACACCTGACCTG	462	405	493	398	350	412	420	26232492903979	-0.229	-149998973343173	0.134	0.746	265641765365056	0.00621	-0.235	0.853226098112067
ADAMTS6-2	ADAMTS6	x	TAATAAGAACTGCATTATCG	118	157	145	190	116	144	145	216136800223497	0.0995	0.372423289520257	0.71	0.964	214612803567824	-0.00983	0.109	107140207851908
ADAMTS6-3	ADAMTS6	x	TGGCCCCAGAGCATAGATGG	252	296	276	197	288	189	250	239794000867204	-0.29	-136833124442186	0.171	0.781	243880595697745	-0.00245	-0.288	0.817902058557781
ADAMTS6-4	ADAMTS6	x	TTAGACAACTGTCATTACAC	264	304	245	343	299	263	286	245636603312904	0.155	0.832048281019598	0.405	0.897	243296929087441	-0.000293	0.155	111342161822869
ADAMTS7-1	ADAMTS7	x	GAAAAGCATCAACATGAAGG	315	285	343	278	216	225	277	244247976906445	-0.391	-20930095743364	0.0363	0.557	249739043801767	-0.000813	-0.39	0.762600826628142
ADAMTS7-2	ADAMTS7	x	GCCCGTAGGACAGATCCTCG	36	60	61	79	52	39	54	173239375982297	0.115	0.267128310177196	0.789	0.976	171877839768957	-0.0348	0.15	108297504552592
ADAMTS7-3	ADAMTS7	x	GGACGCCAGGTGGCACCGAG	95	72	71	73	73	57	74	186923171973098	-0.229	-0.675039325326067	0.5	0.923	189945570233685	-0.0282	-0.201	0.853226098112067
ADAMTS7-4	ADAMTS7	x	TTCTACGAGCTACAATACCG	252	212	206	178	167	179	199	229885307640971	-0.355	-170895860834946	0.0875	0.682	234895354798116	-0.00544	-0.35	0.781869643128594
ADAMTS8-1	ADAMTS8	x	AAACCGCTTGGTCCTACTCG	208	237	218	175	284	226	225	235218251811136	0.0471	0.213917101422432	0.831	0.98	234439227368511	-0.00396	0.0511	103318600019851
ADAMTS8-2	ADAMTS8	x	AAGGACCCCGAGCCTCAGAA	332	431	256	287	404	361	345	253781909507327	0.046	0.222972387241748	0.824	0.98	253105292928676	0.00281	0.0432	103239853548324
ADAMTS8-3	ADAMTS8	x	CCACCCAGAGCACTACGACA	563	504	710	570	457	663	578	276192783842053	-0.0724	-0.436660117543207	0.662	0.957	277256617308564	0.0117	-0.0841	0.951054551461097
ADAMTS8-4	ADAMTS8	x	TTCAAGATCGAGCGCCTCGG	343	321	265	354	409	313	334	252374646681156	0.212	11875476159163	0.235	0.824	249089445927398	0.00225	0.21	115829280619464
ADAMTS9-1	ADAMTS9	x	ACTGAAAGGTAACTCACACA	450	501	527	595	450	518	507	270500795933334	0.0807	0.543216445346497	0.587	0.944	269255317933914	0.00944	0.0713	105753103335638
ADAMTS9-2	ADAMTS9	x	AGCCCGGAGAGATAAATGTG	142	129	105	121	128	211	139	214301480025409	0.291	101822923284963	0.309	0.862	2098066590208	-0.0108	0.302	122348804113187
ADAMTS9-3	ADAMTS9	x	CTGCGCCTATAAATGATGTG	271	389	382	313	248	257	310	249136169383427	-0.349	-179730127549028	0.0723	0.66	254074646424384	0.00101	-0.35	0.785128118673572
ADAMTS9-4	ADAMTS9	x	TGAAAGAATAGCGTACATCG	264	162	138	226	198	257	208	231806333496276	0.272	10686532258593	0.285	0.851	227415784926368	-0.0049	0.277	12074805914865
ADAMTSL1-1	ADAMTSL1	x	AGGTGCTAGTTCAACAACCA	273	253	327	348	249	137	264	242160392686983	-0.217	-0.81509942275345	0.415	0.9	245382777644786	-0.00159	-0.215	0.86035263061144
ADAMTSL1-2	ADAMTSL1	x	CAGCTCGACGCACGTCACGG	153	208	178	78	197	93	151	217897694729317	-0.551	-171154380945896	0.087	0.682	225446751046708	-0.00895	-0.542	0.682546858942583
ADAMTSL1-3	ADAMTSL1	x	TGGAATTGACAACCGTTGAG	179	180	149	181	218	150	176	224551266781415	0.112	0.478895018411012	0.632	0.952	222874245756426	-0.00696	0.119	108072540203935
ADAMTSL1-4	ADAMTSL1	x	TGTATGACTGGGAGTATGAG	176	206	174	315	269	176	219	234044411484012	0.451	190510715259316	0.0568	0.625	226795353686239	-0.00429	0.455	136698745194181
ADAMTSL2-1	ADAMTSL2	x	CGTACGCAGACATGACCCCT	264	188	169	176	157	202	193	228555730900777	-0.215	-0.906558871689733	0.365	0.884	231597034545692	-0.00584	-0.209	0.861546159712017
ADAMTSL2-2	ADAMTSL2	x	CGTCCGCCCGTTGTACACGT	91	55	84	105	190	130	109	203742649794062	0.886	273099630381936	0.00631	0.324	188460658129793	-0.0174	0.903	184804514489365
ADAMTSL2-3	ADAMTSL2	x	GACCGGAATCGAGTACATCG	187	226	280	205	198	261	226	23541084391474	-0.0617	-0.279804310151022	0.78	0.975	236361197989214	-0.00391	-0.0578	0.958134435963762
ADAMTSL2-4	ADAMTSL2	x	TGACGGGCAACTATCGCAAG	139	111	85	144	118	146	124	209342168516224	0.284	101563702220045	0.31	0.862	204792355231718	-0.0138	0.298	121756601866299
ADAMTSL3-1	ADAMTSL3	x	ATTTCTGGAATCGTCGCACG	180	170	117	130	89	138	137	213672056715641	-0.387	-138035612492152	0.167	0.777	219219562584645	-0.0112	-0.376	0.764718138941384
ADAMTSL3-2	ADAMTSL3	x	CCAAACTATTGGCTTCGCTG	138	87	144	83	133	106	115	206069784035361	-0.197	-0.640967378477131	0.522	0.928	20899051114394	-0.0158	-0.181	0.872362705770759
ADAMTSL3-3	ADAMTSL3	x	CCTTGCACAGCAACATGCGT	155	222	226	204	140	174	187	22718416065365	-0.219	-0.90602581984383	0.365	0.884	230319605742049	-0.00629	-0.213	0.859160754947185
ADAMTSL3-4	ADAMTSL3	x	GCAGCAGGATCATTATATCG	61	69	78	59	67	47	64	180617997398389	-0.266	-0.732961201467951	0.464	0.914	18409420802431	-0.0312	-0.235	0.831622098374906
ADAMTSL4-1	ADAMTSL4	x	AGGACGGTTATATCGAAAGA	239	307	422	307	221	285	297	247275644931721	-0.252	-1138545131437	0.255	0.834	250875410258873	0.000318	-0.252	0.83973149294414
ADAMTSL4-2	ADAMTSL4	x	CCTTCTCCTAAGGAGTGCGT	428	375	363	435	407	430	406	260852603357719	0.126	0.8418085970456	0.4	0.895	258957729570333	0.00563	0.12	109126387705493
ADAMTSL4-3	ADAMTSL4	x	GCTGCGTACTGGAAACGAGT	209	332	267	369	202	350	288	245939248775923	0.189	0.788890974196029	0.43	0.904	243029010605492	-0.00018	0.189	113997327269346
ADAMTSL4-4	ADAMTSL4	x	GGGGGCCCCCTCGGTCAGTG	301	336	269	410	361	333	335	252504480703685	0.285	166454854172191	0.096	0.697	248000694295715	0.0023	0.283	121841026367519
ADAMTSL5-1	ADAMTSL5	x	AGAACTCAAACTCGATGCCA	328	225	200	224	169	245	232	23654879848909	-0.239	-101380654219885	0.311	0.862	239967372148104	-0.00356	-0.235	0.847332434946118
ADAMTSL5-2	ADAMTSL5	x	GCACACTGTAGGTCTCGGAA	283	301	285	240	235	332	279	24456042032736	-0.107	-0.553334824430603	0.58	0.943	2461898521729	-0.000696	-0.106	0.928516852306729
ADAMTSL5-3	ADAMTSL5	x	GGATGTGTCTGGCGCCCTCG	138	119	137	177	88	188	141	214921911265538	0.201	0.675542208172787	0.499	0.923	211837496710591	-0.0105	0.212	114949484803468
ADAMTSL5-4	ADAMTSL5	x	TGGTCTACACCCGAGACACA	248	232	203	319	221	215	240	238021124171161	0.145	0.673335599802483	0.501	0.923	235729944896187	-0.00308	0.148	110573065332027
ADAP1-1	ADAP1	x	CAGGTGCTCGATCTTCATCA	166	176	150	60	161	158	145	216136800223497	-0.376	-116268171653654	0.245	0.83	22148438480477	-0.00983	-0.366	0.770571108358408
ADAP1-2	ADAP1	x	GCTTCCAGAGAAAACCCTCA	92	58	52	47	49	115	69	183884909073726	0.0629	0.146171949513004	0.884	0.987	182823011472696	-0.0296	0.0925	104456335674029
ADAP1-3	ADAP1	x	GTGGGCCGGTAGTAGAAGGA	651	740	662	467	580	480	597	277597433112937	-0.427	-315091641636733	0.00163	0.187	283526769465093	0.0123	-0.439	0.743806881217253
ADAP1-4	ADAP1	x	GTTTGTGCTGACAGAACGAG	178	199	94	118	135	147	145	216136800223497	-0.236	-0.802504270910726	0.422	0.902	219589965240923	-0.00983	-0.226	0.84909624644684
ADAP2-1	ADAP2	x	CCTCCTGAAGTACTTCACAA	176	225	234	237	261	200	222	234635297445064	0.136	0.646806809528225	0.518	0.927	232565247057231	-0.00413	0.14	109885421757688
ADAP2-2	ADAP2	x	CTGGGACGACAGTATTGTGG	291	321	301	312	358	367	325	251188336097887	0.184	111378997067484	0.265	0.841	248334952281464	0.00179	0.182	113602926478669
ADAP2-3	ADAP2	x	TGATGTCAGGGAAGTTACGG	132	135	198	195	176	261	183	226245108973043	0.443	176101819626161	0.0782	0.669	219033169817029	-0.00655	0.45	135942824190674
ADAP2-4	ADAP2	x	TGTTTGTGTATCATGAAAGT	39	68	79	73	69	50	63	179934054945358	0.0458	0.115719120870555	0.908	0.989	179239168949825	-0.0315	0.0773	103225542457635
ADAR-1	ADAR	x	AGGCAATCAACACCTCTCTG	246	211	179	229	257	153	212	232633586092875	0.00679	0.028523222940925	0.977	0.997	232633586092875	-0.00467	0.0115	100471756217875
ADAR-2	ADAR	x	CGTTCTCCCCAATCAAGACA	215	179	226	113	190	125	175	224303804868629	-0.535	-211063938407893	0.0348	0.551	231527043477859	-0.00701	-0.528	0.690158676698315
ADAR-3	ADAR	x	GTGCATACACTCAAGCAGTG	198	222	121	95	168	249	176	224551266781415	-0.0795	-0.248136964135098	0.804	0.977	225607601038691	-0.00696	-0.0725	0.946385582144429
ADAR-4	ADAR	x	TTCTTGTAGGGTGAACACCG	132	102	160	172	121	75	127	210380372095596	-0.0985	-0.305760897416985	0.76	0.972	211837496710591	-0.0131	-0.0854	0.934003589806141
ADARB1-1	ADARB1	x	GGTGAATACATGAGTGATCG	150	132	109	129	130	160	135	213033376849501	0.0998	0.386205950830335	0.699	0.963	21150555026762	-0.0115	0.111	10716248934838
ADARB1-2	ADARB1	x	TCAGGTCACCAAACTTACCC	282	335	360	388	336	385	348	254157924394658	0.183	109013558979304	0.276	0.846	251277330899911	0.00296	0.18	113524210214606
ADARB1-3	ADARB1	x	TTCAGAAATCAGAGCGAGGG	436	412	479	323	427	395	412	261489721603313	-0.213	-133206024714216	0.183	0.79	264574966814477	0.00589	-0.219	0.862741344542656
ADARB1-4	ADARB1	x	TTGGAGCCCACGTAAAAGGG	370	311	438	519	404	312	392	259328606702046	0.142	0.719419072628392	0.472	0.916	257170883180869	0.00503	0.137	110343374004196
ADARB2-1	ADARB2	x	CAGAGCGATCGATATTCGTG	213	287	203	159	189	263	219	234044411484012	-0.202	-0.847139392350256	0.397	0.894	236983407030016	-0.00429	-0.198	0.869344560090022
ADARB2-2	ADARB2	x	GGCGTTGGGGAACTGCACGA	306	259	293	291	256	285	282	245024910831936	-0.0444	-0.251218322741494	0.802	0.977	245636603312904	-0.000522	-0.0439	0.969693017074618
ADARB2-3	ADARB2	x	GTGGACGGCAGGACGTTCGA	420	459	322	460	313	417	398	259988307207369	-0.0133	-0.0711025750250356	0.943	0.994	260242175268324	0.00529	-0.0186	0.990823505884747
ADARB2-4	ADARB2	x	TCCTGGCATCACAAACACGG	281	308	269	317	181	339	282	245024910831936	-0.0357	-0.158968742040996	0.874	0.985	245636603312904	-0.000522	-0.0352	0.975558302083125
ADAT1-1	ADAT1	x	ATGCTGAGGTCATAGCCAGA	480	635	404	639	483	482	520	27160033436348	0.0786	0.442218550650987	0.658	0.957	270443651914312	0.00988	0.0687	105599280138652
ADAT1-2	ADAT1	x	CTATCACTTTGGCACTACCA	254	216	258	369	293	284	279	24456042032736	0.378	200445409006765	0.045	0.59	238501012459337	-0.000696	0.379	129953906245544
ADAT1-3	ADAT1	x	GCATCCGAGGACGTTCCATC	91	145	114	60	115	133	110	204139268515822	-0.184	-0.547569325558541	0.584	0.943	206694678963061	-0.0171	-0.167	0.880259013563151
ADAT1-4	ADAT1	x	GTGGACATTATTGGCAGCGG	121	87	240	192	91	149	147	216731733474818	-0.0525	-0.14699374639298	0.883	0.986	217415675927848	-0.00952	-0.043	0.964263938251951
ADAT2-1	ADAT2	x	CACTTTGACGACACCAATCG	450	409	406	289	450	406	402	260422605308447	-0.144	-0.810257925519933	0.418	0.901	262496927079217	0.00547	-0.149	0.905006462882905
ADAT2-2	ADAT2	x	GCAGCTGCACACATAATGCA	44	47	100	31	46	53	54	173239375982297	-0.555	-122311917983047	0.221	0.817	180391211252807	-0.0348	-0.52	0.680657058249737
ADAT2-3	ADAT2	x	GGAGACCGAAAAGTGGATGG	180	127	182	189	206	158	174	22405492482826	0.177	0.739847291581796	0.459	0.913	221218760440396	-0.00707	0.184	113053056712459
ADAT2-4	ADAT2	x	TGACAGCCATATACAACCAG	40	32	25	15	29	59	33	151851393987789	0.0866	0.150713056780727	0.88	0.986	150965047954658	-0.0454	0.132	106186473425884
ADAT3-1	ADAT3	x	CCCACACCGCCCGCTCCATG	134	139	83	121	117	132	121	208278537031645	0.0556	0.195157500500967	0.845	0.982	207432874325321	-0.0144	0.07	103929124250733
ADAT3-2	ADAT3	x	CGAGGCCGGGTCCACTACCA	41	76	76	71	72	53	65	181291335664286	0.0223	0.0577016076773088	0.954	0.995	180843605428811	-0.0309	0.0532	101557726226857
ADAT3-3	ADAT3	x	GCTTCTCGGACAGGACAGGG	36	31	23	40	31	56	36	155630250076729	0.497	10095920610785	0.313	0.863	147712125471966	-0.0435	0.54	141127584340869
ADAT3-4	ADAT3	x	TTGTCCTCGTGGAAGGACGT	130	207	208	216	246	248	209	232014628611105	0.382	165997469597181	0.0969	0.7	225927524755698	-0.00484	0.387	130314714936329
ADCK1-1	ADCK1	x	GAGTGTCCCTTATGGCTCAG	106	144	188	64	182	107	132	212057393120585	-0.311	-0.887071106416141	0.375	0.888	216435285578444	-0.0121	-0.299	0.806082831492968
ADCK1-2	ADCK1	x	GCTTCGATGACACCCCTCTG	229	307	124	141	165	161	188	227415784926368	-0.499	-174185616118342	0.0815	0.673	234242268082221	-0.00622	-0.493	0.707597080163328
ADCK1-3	ADCK1	x	GGTGCGGAAGCACCCCGGCA	105	167	243	197	127	103	157	219589965240923	-0.27	-0.841715017743794	0.4	0.896	223468597432153	-0.00825	-0.262	0.829319545814442
ADCK1-4	ADCK1	x	TTTCAGATCTCACGCCACCT	296	224	255	229	225	249	246	239093510710338	-0.141	-0.727378549693643	0.467	0.915	241218044778665	-0.0027	-0.138	0.906890328933143
ADCK2-1	ADCK2	x	CCTCCGAAAACAGATCGCGC	339	385	355	298	400	358	356	255144999797288	-0.0311	-0.184224009049613	0.854	0.983	255590018996325	0.00336	-0.0345	0.978673811547031
ADCK2-2	ADCK2	x	CCTGGTTGGATCAAATGCAG	428	443	395	342	337	479	404	260638136511061	-0.129	-0.748382132039188	0.454	0.912	262531245096167	0.00555	-0.135	0.914465089499901
ADCK2-3	ADCK2	x	GGCGTATGCTTTGTACACCT	342	412	282	359	413	335	357	255266821611219	0.0956	0.529582535775174	0.596	0.945	253823850068955	0.0034	0.0922	106850969634435
ADCK2-4	ADCK2	x	TTCGCCGACTCAGAACGTCA	637	645	582	502	560	514	573	275815462196739	-0.242	-190043739852382	0.0574	0.627	27933246532983	0.0115	-0.254	0.845572287377517
ADCK3-1	ADCK3	x	CCGAATGAAGGGCGGCCGCG	51	153	97	157	177	179	136	213353890837022	0.769	231933022181672	0.0204	0.477	200144524087418	-0.0114	0.78	170408819014973
ADCK3-2	ADCK3	x	CCTGGCTAAGATCTTCGAGC	270	241	263	232	338	232	263	241995574848976	0.0513	0.251311803410867	0.802	0.977	241161970596323	-0.00165	0.053	103619821251942
ADCK3-3	ADCK3	x	CCTGGGTCATGCCCACAGCG	84	75	60	60	100	96	79	189762709129044	0.225	0.65078460303687	0.515	0.927	186332286012046	-0.0269	0.252	116877724856125
ADCK3-4	ADCK3	x	TGTCCGAGGCCAATGCAGAG	154	204	169	232	279	123	194	228780172993023	0.267	0.958569786822707	0.338	0.874	224468936049288	-0.00577	0.273	12033030259995
ADCK4-1	ADCK4	x	GCACCTTGCGTTCTCGAGAG	39	39	27	57	57	46	44	164345267648619	0.608	140539395960492	0.16	0.771	154406804435028	-0.0392	0.647	152414483033977
ADCK4-2	ADCK4	x	GGAGTGTGACTACCGTCGTG	235	308	303	210	260	276	265	242324587393681	-0.181	-0.916864623605341	0.359	0.883	245024910831936	-0.00153	-0.179	0.882091365197177
ADCK4-3	ADCK4	x	TAAGGTCTGCACAATCCGCT	138	130	177	110	79	115	125	209691001300806	-0.55	-197948421890464	0.0478	0.597	217123875626127	-0.0136	-0.536	0.683020128377198
ADCK4-4	ADCK4	x	TTAAGGAGCTGTGCACGACA	223	307	279	239	215	280	257	240993312333129	-0.14	-0.697581191697394	0.485	0.919	243082726689261	-0.00202	-0.138	0.907519155317161
ADCK5-1	ADCK5	x	CACCCCTCGAAGGACAACAT	338	368	338	364	438	363	368	256584781867352	0.158	0.992982918345759	0.321	0.865	254157924394658	0.00393	0.154	111573932232496
ADCK5-2	ADCK5	x	CGCGGGGCACCACGACGTAG	394	399	352	283	261	362	342	253402610605613	-0.338	-191793983253614	0.0551	0.621	258168423195624	0.00266	-0.341	0.79113730118545
ADCK5-3	ADCK5	x	GTGCCTCTGCCATGACATAG	813	732	622	493	672	638	662	28208579894397	-0.265	-179027462186517	0.0734	0.662	285873765660016	0.014	-0.279	0.832198734711525
ADCK5-4	ADCK5	x	TGCCAGGATGTGGGTCCGAG	169	207	243	175	121	139	176	224551266781415	-0.509	-208898387611778	0.0367	0.559	231456939430046	-0.00696	-0.502	0.70270935010336
ADCY10-1	ADCY10	x	AATGCTTACCTATCTTGACT	436	457	455	425	454	523	458	266086547800387	0.0567	0.393031141232081	0.694	0.962	265256863747964	0.0077	0.049	104008396465312
ADCY10-2	ADCY10	x	AGAAAACAGCCTACGAGCTG	362	335	388	369	349	348	358	255388302664387	-0.0255	-0.163793001803983	0.87	0.985	255830848346489	0.00345	-0.0289	0.982480037899884
ADCY10-3	ADCY10	x	GCACAGGGAATGTTAACGAA	217	283	233	301	319	274	271	243296929087441	0.286	15305878650935	0.126	0.737	238798271992147	-0.00117	0.287	12192550940763
ADCY10-4	ADCY10	x	TCACAAACACAATCGTCACT	449	476	438	542	406	468	463	266558099101795	0.055	0.364174209177059	0.716	0.966	265737460111501	0.00788	0.0471	103885910329766
ADCY1-1	ADCY1	x	AACCGGGTTACGGACATGAG	232	159	144	181	197	197	185	226717172840301	0.104	0.436113936885819	0.663	0.957	225123252730157	-0.00643	0.11	10747491728555
ADCY1-2	ADCY1	x	CATGTTCAGATCCACCTCGG	122	252	168	209	170	162	180	225527250510331	-0.00266	-0.00982306385824499	0.992	0.998	225687803181872	-0.00673	0.00407	0.998157927202216
ADCY1-3	ADCY1	x	CCCAGACGAAAGGACCACCA	455	531	536	396	415	515	475	267669360962487	-0.199	-129591796195017	0.195	0.799	270529339771489	0.00832	-0.207	0.871154192142256
ADCY1-4	ADCY1	x	CGGGGTGGTGTAGACAACGT	211	204	218	182	119	224	193	228555730900777	-0.27	-109413791768596	0.274	0.845	232428245529769	-0.00584	-0.264	0.829319545814442
ADCY2-1	ADCY2	x	ACTCCAAGTACCGGGTCATG	330	277	166	192	171	163	216	233445375115093	-0.555	-222182571959872	0.0263	0.512	241105823919866	-0.00445	-0.551	0.680657058249737
ADCY2-2	ADCY2	x	CAGGCAGACGCTAAGCACGA	557	540	395	431	462	479	477	267851837904011	-0.121	-0.76062601220064	0.447	0.909	269664756841699	0.0084	-0.129	0.919550046151658
ADCY2-3	ADCY2	x	CCTGTAATTGCATCAAGTCG	204	143	145	105	246	186	172	223552844690755	0.126	0.426794422686882	0.67	0.958	22148438480477	-0.00718	0.133	109126387705493
ADCY2-4	ADCY2	x	TGAAGCGGCATACAAACGTG	92	149	102	159	104	106	119	207554696139253	0.105	0.347607730596172	0.728	0.967	205817286532311	-0.0149	0.12	107549439045738
ADCY3-1	ADCY3	x	AGCTGTCTCCAGTACTACAC	486	600	496	541	578	517	536	272916478969277	0.0484	0.347840130704746	0.728	0.967	2722085224442	0.0104	0.038	103411741473221
ADCY3-2	ADCY3	x	CCACGGAGATGATCACGATG	347	254	205	243	264	334	274	243775056282039	0.0613	0.277428140175371	0.781	0.975	242921378708543	-0.00099	0.0623	104340554105528
ADCY3-3	ADCY3	x	GTCGATGAGTATCTCGACCA	168	169	160	158	222	111	165	221748394421391	-0.0175	-0.0653659740747327	0.948	0.994	221923513401367	-0.0076	-0.0099	0.987943197140516
ADCY4-1	ADCY4	x	GGAGAGGTTGGAAATCATGG	90	58	85	68	41	87	72	185733249643127	-0.249	-0.650812657358271	0.515	0.927	189023466630636	-0.0288	-0.22	0.84147948228538
ADCY4-2	ADCY4	x	GTGGCCCAAGATACAGCCCG	51	43	75	22	64	113	61	178532983501077	0.236	0.470594828318478	0.638	0.953	175076544989401	-0.0322	0.268	117772278959498
ADCY4-3	ADCY4	x	TGGAGGCAGGCGGTGTACCA	152	155	261	71	128	108	146	216435285578444	-0.888	-294060749933086	0.00328	0.253	227722708099136	-0.00967	-0.878	0.540362701019676
ADCY4-4	ADCY4	x	TTCATCATCTAGTCCCCGGG	172	245	258	206	238	240	226	23541084391474	0.0191	0.0887720779962843	0.929	0.992	235218251811136	-0.00391	0.023	101332713620961
ADCY5-1	ADCY5	x	AGCCGCTCCAGTTTGTCCGA	144	69	133	79	105	75	101	200432137378264	-0.418	-123508892668324	0.217	0.814	206195484407311	-0.0198	-0.398	0.748461493396346
ADCY5-2	ADCY5	x	AGCTACACTCACCTTTACGC	215	270	229	302	340	293	275	243933269383026	0.389	211894273074924	0.0341	0.547	237657695705651	-0.000931	0.39	130948542308357
ADCY5-3	ADCY5	x	CACAGCGGGCGAGTACACTG	226	245	189	226	222	265	229	235983548233989	0.111	0.552709566867345	0.58	0.943	234242268082221	-0.00374	0.115	107997655983288
ADCY5-4	ADCY5	x	GACGACGATCCTCCGCTGAG	302	229	235	360	268	286	280	244715803134222	0.255	129056189656952	0.197	0.801	240710751491294	-0.000638	0.256	119333574303172
ADCY6-2	ADCY6	x	ATAGATCCCAAGCATCAGGG	250	289	322	262	224	170	253	240312052117582	-0.392	-18554853763037	0.0635	0.64	245788189673399	-0.00227	-0.39	0.762072415169885
ADCY6-3	ADCY6	x	GATGACGCCTTCATCCGGAG	40	82	85	98	64	110	80	190308998699194	0.394	103814527029298	0.299	0.858	183884909073726	-0.0266	0.421	131403162714937
ADCY6-4	ADCY6	x	TTGGCCTGGCAACTTAACCG	110	89	74	58	92	102	88	194448267215017	-0.115	-0.341737902973776	0.733	0.968	195904139232109	-0.024	-0.091	0.923382310729395
ADCY7-1	ADCY7	x	AGAGGCACCAGAATGTCAGG	213	266	299	134	283	290	248	239445168082622	-0.138	-0.525129961542025	0.599	0.945	241385834227003	-0.00258	-0.135	0.90877811644852
ADCY7-2	ADCY7	x	CCGTAGCCGGGTGCACATCA	126	136	131	118	108	112	122	208635983067475	-0.218	-0.853314045362451	0.393	0.894	211727129565576	-0.0142	-0.204	0.859756486243006
ADCY7-3	ADCY7	x	GCGTGGGTAGGCAGCGACAC	96	111	100	98	62	100	94	19731278535997	-0.24	-0.767778612086713	0.443	0.908	201001712075752	-0.022	-0.218	0.846745312362527
ADCY7-4	ADCY7	x	TGTACGTCGAGTGTCTCCTG	271	251	268	338	195	313	273	243616264704076	0.0988	0.458172710468099	0.647	0.956	242050583657078	-0.00105	0.0998	10708823570835
ADCY8-1	ADCY8	x	ATTTCCAGGACAACAAACCG	390	289	289	296	363	369	333	252244423350632	0.0868	0.469198660572464	0.639	0.954	250875410258873	0.0022	0.0846	106201195017217
ADCY8-2	ADCY8	x	CAAAACACGATGTTGACATG	287	339	304	354	300	269	309	248995847942483	-0.0109	-0.0610365371053942	0.951	0.994	249136169383427	0.000953	-0.0119	0.992473165299321
ADCY8-3	ADCY8	x	CGATATTTAAGATGGCACCC	57	103	146	95	152	84	106	202530586526477	0.113	0.310406269921852	0.756	0.972	200860017176192	-0.0183	0.131	108147476348362
ADCY8-4	ADCY8	x	GCTGCAGGTCATCCTCCAAG	5	1	2	7	1	2	3	0.477121254719662	0.322	0.19671765453427	0.844	NA	0.425968732272281	-0.0617	0.384	125006230258521
ADCY9-1	ADCY9	x	GATATCGGGTCAGAGAGCCA	294	257	343	407	344	366	335	252504480703685	0.321	18472828480045	0.0647	0.642	247421626407626	0.0023	0.319	124919612565338
ADCY9-2	ADCY9	x	GCTACCACGTCACTGCATCG	232	259	226	282	241	264	251	239967372148104	0.134	0.723700989933744	0.469	0.916	237839790094814	-0.00239	0.136	109733193757924
ADCY9-3	ADCY9	x	GGGAGACTGTTACTACTGCG	387	323	331	300	327	388	343	253529412004277	-0.0365	-0.21216470796766	0.832	0.981	254032947479087	0.00271	-0.0392	0.975017487653333
ADCY9-4	ADCY9	x	TGTACGCCCGGCATTACGCG	312	244	214	245	259	294	261	241664050733828	0.0515	0.256444576134159	0.798	0.976	240936947045282	-0.00177	0.0533	103634187005067
ADCYAP1-1	ADCYAP1	x	AGAGGAAGAGGCGTACGGCG	121	130	101	155	104	114	121	208278537031645	0.0836	0.299731899139142	0.764	0.973	206942140875847	-0.0144	0.098	105965894282078
ADCYAP1-2	ADCYAP1	x	GAAGCACCTGCAGTCGCTCG	1	1	2	1	1	5	2	0.301029995663981	0.807	0.404487231495848	0.686	NA	0.1249387366083	-0.0515	0.858	174956952981164
ADCYAP1-3	ADCYAP1	x	GCTGCCAGACTTCGATGGCT	96	68	100	103	150	115	105	202118929906994	0.479	158639606799337	0.113	0.722	194448267215017	-0.0186	0.498	139377723868747
ADCYAP1-4	ADCYAP1	x	GGCCTCGTTAAGGATCCCGT	130	94	98	111	116	66	102	200860017176192	-0.136	-0.428248018945499	0.668	0.958	203073461697617	-0.0195	-0.116	0.910038824080899
ADCYAP1R1-1	ADCYAP1R1	x	CGAATCTTCAACCCAGACCA	262	192	138	138	206	197	189	227646180417324	-0.13	-0.488010240061062	0.626	0.951	229520045200326	-0.00615	-0.124	0.9138314502294
ADCYAP1R1-2	ADCYAP1R1	x	GGTGAGCCGGAACTGCACGG	254	160	158	243	214	203	205	231175386105575	0.206	0.872145079076575	0.383	0.891	228027477407336	-0.00507	0.211	115348560506002
ADCYAP1R1-3	ADCYAP1R1	x	TGAATATGAATCTGAGACTG	145	169	133	175	106	169	150	217609125905568	0.00965	0.0362986558284974	0.971	0.997	217318626841227	-0.00909	0.0187	100671129074659
ADCYAP1R1-4	ADCYAP1R1	x	TGTGGGACAACATCACGTGT	164	180	165	169	184	140	167	222271647114758	-0.0461	-0.202202042543595	0.84	0.982	22295965276171	-0.00747	-0.0386	0.968551052056761
ADD1-1	ADD1	x	ATTATCGAGCATCCGCATGA	694	759	782	643	713	1091	780	289209460269048	0.131	0.79478291876653	0.427	0.903	287215627274829	0.0169	0.114	109505247079357
ADD1-2	ADD1	x	CCTCTTGCCAATCTCCCCGG	409	401	451	472	410	471	436	263948648926859	0.102	0.696239231525843	0.486	0.919	262359383185342	0.00685	0.0952	107326028639345
ADD1-3	ADD1	x	GACTAGCAGATCTCTTTGGG	248	302	264	323	343	271	292	246538285144842	0.203	111678639658301	0.264	0.84	243350315016954	4.38e-05	0.203	115108949132776
ADD1-4	ADD1	x	GTAATGCCAATAGGCCTGTG	826	711	545	734	700	681	700	284509804001426	0.0227	0.155351120474311	0.877	0.986	284135947045485	0.015	0.0077	101585887911355
ADD2-1	ADD2	x	ACTCGGCCATCTATGCAGCG	306	279	375	345	382	299	331	251982799377572	0.0959	0.53120530307644	0.595	0.945	250514997831991	0.0021	0.0938	106873190979257
ADD2-2	ADD2	x	GCTGAGTGACACCTATGTCA	169	152	194	233	284	234	211	232428245529769	0.544	259570897590913	0.00944	0.376	223468597432153	-0.00473	0.549	145800937881658
ADD2-3	ADD2	x	GGAGAAGCACCGGCCCCATG	345	439	376	446	381	234	370	256820172406699	-0.129	-0.608073920527671	0.543	0.934	258733673450726	0.00403	-0.133	0.914465089499901
ADD2-4	ADD2	x	GGTGCTAAGAAACCATGGAG	190	132	89	145	121	124	134	212710479836481	-0.0757	-0.253520442969922	0.8	0.977	213672056715641	-0.0117	-0.064	0.948881609010281
ADD3-1	ADD3	x	AAGGATCCCACATTTCATGG	265	257	133	248	154	229	214	233041377334919	-0.0539	-0.197377078341716	0.844	0.982	233912004527212	-0.00456	-0.0493	0.96332866456081
ADD3-2	ADD3	x	ACCCAGAATACATTAGGGAG	157	166	173	188	160	205	175	224303804868629	0.157	0.708018845708411	0.479	0.918	221836042177054	-0.00701	0.164	11149662187277
ADD3-3	ADD3	x	CTAGGCTTCTCTCGAATGAG	227	145	192	292	220	143	203	230749603791321	0.216	0.800436827806489	0.423	0.902	227415784926368	-0.00519	0.221	116150873192572
ADD3-4	ADD3	x	GTCTACAAGTCTGTACAGGC	257	226	245	210	260	189	231	236361197989214	-0.144	-0.708388346491141	0.479	0.917	238501012459337	-0.00362	-0.14	0.905006462882905
ADGB-1	ADGB	x	AAAAGCGACAAAGTTCCAAA	195	235	216	226	224	261	226	23541084391474	0.138	0.702268954272586	0.483	0.918	233311126327542	-0.00391	0.142	110037860936614
ADGB-2	ADGB	x	CAACTTATGAATTTGAACTG	268	188	259	209	171	185	213	232837960343874	-0.34	-156024869008389	0.119	0.729	237718478708142	-0.00462	-0.335	0.790041311863377
ADGB-3	ADGB	x	GAAGGTAAATCAGATCCTGG	112	126	166	135	161	153	142	215228834438306	0.152	0.594260444915719	0.552	0.937	212926011039094	-0.0103	0.162	111110872865509
ADGB-4	ADGB	x	TCAGTGAAATCTATGCAGTG	194	166	115	177	132	165	158	219865708695442	-0.00304	-0.0116075200278666	0.991	0.998	21995723549052	-0.00815	0.00511	0.997895051089847
ADGRA1-1	ADGRA1	x	ACCTTCACTGTGTTCGCCGG	250	262	217	291	232	196	241	238201704257487	-0.0199	-0.0956319399914899	0.924	0.992	238560627359831	-0.00301	-0.0169	0.986301067304456
ADGRA1-2	ADGRA1	x	CCCCGCACTTGACGCCAACG	177	215	204	118	118	189	170	223044892137827	-0.488	-192630776829234	0.0541	0.617	229812500502057	-0.00729	-0.481	0.71301285868207
ADGRA1-3	ADGRA1	x	GGTGCCCAGGAAGTACACAC	112	208	89	167	142	66	131	211727129565576	-0.125	-0.339927878900158	0.734	0.968	213460205328768	-0.0123	-0.113	0.917004043204671
ADGRA1-4	ADGRA1	x	TGCACTCAGTACCTGAGCAG	404	375	343	439	391	386	390	25910646070265	0.116	0.754635758476538	0.45	0.91	257287160220048	0.00494	0.111	108372596684478
ADGRA2-1	ADGRA2	x	AGGGATGAGAATAGACTCGG	60	75	71	53	49	70	63	179934054945358	-0.26	-0.713419869566492	0.476	0.917	183674596564949	-0.0315	-0.228	0.835087919428369
ADGRA2-2	ADGRA2	x	GAGCTGACGCTGTCTCACAT	156	169	125	159	243	134	164	22148438480477	0.252	0.935711054218866	0.349	0.879	217609125905568	-0.00767	0.26	119085684936497
ADGRA2-3	ADGRA2	x	GCCACGTTCCTCGCATTCTG	195	212	179	174	155	215	188	227415784926368	-0.107	-0.482165974922731	0.63	0.951	229077636129843	-0.00622	-0.101	0.928516852306729
ADGRA2-4	ADGRA2	x	TGAGCAATAACAAGATCACG	63	11	35	85	61	113	61	178532983501077	1.25	247748862950812	0.0132	0.418	156030524322096	-0.0322	1.28	237841423000544
ADGRA3-1	ADGRA3	x	ATCTGAACTATACACCCAGG	266	218	208	239	247	274	242	238381536598043	0.135	0.694516816104193	0.487	0.919	23629848397371	-0.00295	0.138	109809281378705
ADGRA3-2	ADGRA3	x	CACTCCTACCCATAGTACTG	435	572	631	432	648	526	541	273319726510657	-0.0285	-0.163139075470156	0.87	0.985	273719264270474	0.0106	-0.0391	0.980439150783342
ADGRA3-3	ADGRA3	x	TGATGGAAAACGACGTACTG	252	333	190	254	226	225	247	239269695325967	-0.137	-0.614580032148805	0.539	0.933	241218044778665	-0.00264	-0.134	0.909408251800733
ADGRA3-4	ADGRA3	x	TTCAGCGCATTGCTACCTAC	297	241	162	273	211	163	224	235024801833416	-0.114	-0.443105886527186	0.658	0.957	236797678529459	-0.00402	-0.11	0.924022572446823
ADGRB1-1	ADGRB1	x	CAGGATGAGTACCGGCAGTG	403	482	470	408	384	407	426	262940959910272	-0.176	-119712117269103	0.231	0.822	265481804049076	0.00646	-0.182	0.885153764579545
ADGRB1-2	ADGRB1	x	CCCACGATGAGCGTCACCGA	396	332	493	407	284	310	370	256820172406699	-0.287	-148603711803215	0.137	0.75	260959440922522	0.00403	-0.291	0.819604607637517
ADGRB1-3	ADGRB1	x	CCTGTGGGGCGAATGCACGC	304	292	291	203	325	305	287	245788189673399	-0.0906	-0.449116058054543	0.653	0.956	247080236511206	-0.000236	-0.0904	0.939132093927312
ADGRB1-4	ADGRB1	x	GAAGCATCCGTGTTTGTGGT	574	498	543	563	484	529	532	272591163229505	-0.0353	-0.26139787381668	0.794	0.976	273105127194746	0.0103	-0.0456	0.975828821778009
ADGRB2-1	ADGRB2	x	ATCATCAGCCGAGGGCACGT	227	202	259	239	210	277	236	237291200297011	0.0776	0.381623586544038	0.703	0.963	236046718351585	-0.00332	0.0809	105526109657241
ADGRB2-2	ADGRB2	x	CAGCCACTGATAGCAAGTGG	202	298	250	206	166	177	216	233445375115093	-0.45	-20623093927113	0.0392	0.569	239794000867204	-0.00445	-0.446	0.732042847972813
ADGRB2-3	ADGRB2	x	CTCTCTCGTAGGCGACCCGG	297	219	328	267	390	229	288	245939248775923	0.0701	0.309424646154634	0.757	0.972	244922119190599	-0.00018	0.0703	104978944696079
ADGRB2-4	ADGRB2	x	TGAGCAAGACCTCGACAAAG	125	84	100	89	86	106	98	199122607569249	-0.137	-0.455617599525297	0.649	0.956	201283722470517	-0.0207	-0.116	0.909408251800733
ADGRB3-1	ADGRB3	x	AGGCGAATAAGGACCTGTCA	370	440	383	420	471	379	410	261278385671974	0.0902	0.576679986888678	0.564	0.939	259951918895068	0.0058	0.0844	106451774571964
ADGRB3-2	ADGRB3	x	AGGGTCAATAGAGTTAATGC	38	27	33	102	66	64	55	174036268949424	1.24	303678571630046	0.00239	0.222	151410482097283	-0.0344	1.27	236198532285906
ADGRB3-3	ADGRB3	x	CCAAGTCTGCAATCTTACCA	392	355	303	269	311	211	307	248713837547719	-0.409	-211018558266028	0.0348	0.551	254406804435028	0.000848	-0.41	0.753145233316906
ADGRB3-4	ADGRB3	x	TACAGTACACGGAGTATGGG	205	237	252	203	220	191	218	23384564936046	-0.177	-0.882713266876599	0.377	0.889	236423821573519	-0.00434	-0.173	0.884540435331541
ADGRD1-1	ADGRD1	x	AAAAGAAAACGTGACCCCTG	175	203	211	171	183	183	188	227415784926368	-0.133	-0.631097247142755	0.528	0.93	229299404006744	-0.00622	-0.127	0.911933165519769
ADGRD1-2	ADGRD1	x	CCTGCTCAGACCCTATCACG	61	93	77	105	80	109	88	194448267215017	0.348	107943341352552	0.28	0.848	188649072517248	-0.024	0.372	127279493527594
ADGRD1-3	ADGRD1	x	GAAGGGGTCTGGTCGAACCA	137	126	123	168	96	243	149	217318626841227	0.393	12809732023357	0.2	0.803	210946604995209	-0.00923	0.402	131312112542415
ADGRE1-1	ADGRE1	x	CACGTGGACTAAATTCACCA	87	122	146	137	136	102	122	208635983067475	0.0791	0.273426879224581	0.785	0.975	207310709833543	-0.0142	0.0933	10563588440297
ADGRE1-2	ADGRE1	x	CCAGGATTTGAATCCAGCAG	141	139	197	106	96	157	139	214301480025409	-0.41	-145810768323097	0.145	0.757	220139712432045	-0.0108	-0.399	0.752623373705534
ADGRE1-3	ADGRE1	x	CCTGCAAAAACCTGTCAGGG	64	81	54	109	99	86	82	191381385238372	0.563	172465571627619	0.0846	0.678	182173182169004	-0.026	0.589	147733806358256
ADGRE1-4	ADGRE1	x	TGCCACCTGCACCAATACAG	120	182	128	101	152	99	130	211394335230684	-0.289	-0.999179021186836	0.318	0.865	215634720085992	-0.0125	-0.276	0.818469181590804
ADGRE2-1	ADGRE2	x	ACCGTCACAAGTCTCCATGG	42	142	99	133	45	97	93	196848294855394	-0.0414	-0.0937487398260678	0.925	0.992	197466518080463	-0.0224	-0.019	0.971711534984645
ADGRE2-2	ADGRE2	x	AGACAAGGCCCACCACAGAA	347	272	289	275	367	308	310	249136169383427	0.0652	0.353142508935194	0.724	0.967	248096459380142	0.00101	0.0642	104622996801022
ADGRE2-3	ADGRE2	x	GCACATCGTAGTGGGCCATG	130	295	236	205	308	294	245	238916608436453	0.288	107766678915528	0.281	0.848	234308020476598	-0.00277	0.291	122094651266913
ADGRE2-4	ADGRE2	x	TCCACCAGCACTCACACGGT	141	145	110	142	142	85	128	210720996964787	-0.102	-0.354601921670716	0.723	0.966	212057393120585	-0.0129	-0.0891	0.931740429304773
ADGRE3-1	ADGRE3	x	ATCATCCAGGGAGACACACA	418	404	283	369	376	412	377	257634135020579	0.0663	0.373606256921608	0.709	0.964	256624102330147	0.00435	0.062	104702798268725
ADGRE3-2	ADGRE3	x	CACCTCCTCAAAGACAACCG	80	193	126	88	96	96	113	205307844348342	-0.511	-154983895980072	0.121	0.733	212385164096709	-0.0163	-0.495	0.701735863019538
ADGRE3-3	ADGRE3	x	CAGGTGACTGCAATTACACA	185	124	93	126	136	137	134	212710479836481	-0.0108	-0.0373682553245868	0.97	0.997	212710479836481	-0.0117	0.0009	0.99254196068119
ADGRE3-4	ADGRE3	x	GATTGATCGAACTGAACCCA	182	111	162	195	255	79	164	22148438480477	0.217	0.633859603142286	0.526	0.929	218089014193745	-0.00767	0.225	116231410751812
ADGRE5-1	ADGRE5	x	ACCGTCACAAGTCTCCGTCG	139	65	118	120	177	96	119	207554696139253	0.287	0.855994959107107	0.392	0.893	203073461697617	-0.0149	0.302	122010051027222
ADGRE5-2	ADGRE5	x	CCCATCGGAGGACTCAAGGT	44	72	77	40	56	41	55	174036268949424	-0.494	-120994648719154	0.226	0.819	180843605428811	-0.0344	-0.46	0.710053679271714
ADGRE5-3	ADGRE5	x	CCTTATGGCTCATTATGACG	61	93	38	81	51	32	59	177085201164214	-0.227	-0.497009403004442	0.619	0.95	180617997398389	-0.0329	-0.194	0.854409740889733
ADGRE5-4	ADGRE5	x	GGCCTCACCTGTGTTCGAAG	73	123	75	108	95	87	94	19731278535997	0.0978	0.302336387115952	0.762	0.973	195584803615474	-0.022	0.12	107014033519188
ADGRF1-1	ADGRF1	x	AAAGACAATGTCATTACACT	128	140	107	140	104	127	124	209342168516224	-0.0155	-0.0578118966977452	0.954	0.995	209691001300806	-0.0138	-0.0017	0.989313726983223
ADGRF1-2	ADGRF1	x	AATACATCTATTCCCATCAG	301	232	253	188	210	181	228	235793484700045	-0.441	-219174522794161	0.0284	0.523	241830129131975	-0.00379	-0.437	0.73662384290824
ADGRF1-3	ADGRF1	x	CAACGGGGAAGATTGTAGAG	221	249	164	334	234	292	249	239619934709574	0.44	201433268821708	0.044	0.586	232496800316207	-0.00252	0.443	135660432744767
ADGRF1-4	ADGRF1	x	TTCTGGGGATCAAGGCATGA	253	201	196	252	244	181	221	234439227368511	0.0587	0.270896032976461	0.786	0.975	233579210192319	-0.00418	0.0629	104152682707335
ADGRF2-1	ADGRF2	x	AATTACACAAGACAGATCTG	473	594	547	594	504	514	538	273078227566639	-0.00179	-0.012572928270823	0.99	0.998	273078227566639	0.0105	-0.0123	0.998760035938313
ADGRF2-2	ADGRF2	x	AGCAAGCTGTTTGCAAATGT	371	376	503	351	382	404	398	259988307207369	-0.137	-0.813621535248286	0.416	0.9	261978875828839	0.00529	-0.142	0.909408251800733
ADGRF2-3	ADGRF2	x	CAGACACTCAGGGAAATATG	246	204	240	206	264	316	246	239093510710338	0.188	0.893872490961005	0.371	0.887	236172783601759	-0.0027	0.191	113918337722211
ADGRF2-4	ADGRF2	x	GGACCTCAATGGACAAGCAA	243	239	239	267	276	310	262	241830129131975	0.243	135432086765923	0.176	0.785	238081400999977	-0.00171	0.245	118345102175257
ADGRF3-1	ADGRF3	x	AGAGTGTAATGTCAACCACA	361	364	395	432	467	512	422	262531245096167	0.333	225658078883919	0.024	0.497	257209676795052	0.0063	0.327	12596299799474
ADGRF3-2	ADGRF3	x	AGTTCCATTACGGACCAATG	230	194	264	152	234	270	224	235024801833416	-0.0687	-0.287765123514299	0.774	0.973	236046718351585	-0.00402	-0.0647	0.953496798759939
ADGRF3-3	ADGRF3	x	CACAAACCTGGCCTACACCG	352	322	328	318	313	285	320	250514997831991	-0.129	-0.793300226804179	0.428	0.903	252374646681156	0.00153	-0.131	0.914465089499901
ADGRF3-4	ADGRF3	x	GCTGAGCACCATGAAATACG	112	174	160	122	138	196	150	217609125905568	0.032	0.116334026537186	0.907	0.989	217221360399248	-0.00909	0.0411	102242853060992
ADGRF4-1	ADGRF4	x	AAATGGTCTGGTGCTATCAG	227	216	224	328	223	274	249	239619934709574	0.307	152497890252449	0.127	0.738	234700457919689	-0.00252	0.31	123713247868717
ADGRF4-2	ADGRF4	x	GGAAAAAGACATCACCACAC	132	129	149	148	132	257	158	219865708695442	0.389	138749058916807	0.165	0.776	213566260200007	-0.00815	0.397	130948542308357
ADGRF4-3	ADGRF4	x	TGACTGCAACAAATCCGAGC	114	100	61	88	90	56	85	192941892571429	-0.233	-0.656584909439553	0.511	0.926	19622114391106	-0.025	-0.208	0.850863729506541
ADGRF4-4	ADGRF4	x	TGATGCAGGCATAATCAAAG	70	67	83	53	33	42	58	176342799356294	-0.781	-202694024365203	0.0427	0.582	186530142610254	-0.0332	-0.748	0.581963267201068
ADGRF5-1	ADGRF5	x	AGTCATGTTGTTGAAAAGTG	623	562	585	442	575	396	530	272427586960079	-0.325	-209654965731691	0.036	0.555	277085201164214	0.0102	-0.335	0.79829838635665
ADGRF5-2	ADGRF5	x	CATCAAGTGCTGCATAGAGG	366	319	359	392	425	302	360	255630250076729	0.1	0.574773210218375	0.565	0.939	254157924394658	0.00355	0.0965	107177346253629
ADGRF5-3	ADGRF5	x	CTTGTAGGACCTATAGAGGG	177	142	274	163	179	185	187	22718416065365	-0.17	-0.659660229723913	0.509	0.926	22959334386446	-0.00629	-0.164	0.88884268116657
ADGRF5-4	ADGRF5	x	TCCATCAAGATACCTCCTCG	264	278	327	254	272	239	272	24345689040342	-0.184	-100836472877515	0.313	0.863	2461898521729	-0.00111	-0.183	0.880259013563151
ADGRG1-1	ADGRG1	x	AGGACCCCATACCTGGAACA	123	157	194	212	88	183	160	220411998265593	0.0271	0.0874676371789416	0.93	0.992	219865708695442	-0.00797	0.0351	101896182322045
ADGRG1-2	ADGRG1	x	CCCCTGCATACTCACATGTG	470	537	363	399	410	498	446	264933485871214	-0.0679	-0.395589378140232	0.692	0.961	265959931243674	0.00724	-0.0751	0.954025676276558
ADGRG1-3	ADGRG1	x	GAGCTCGCACATGTCCACCG	116	204	214	150	136	138	160	220411998265593	-0.333	-123988291420357	0.215	0.814	225042000230889	-0.00797	-0.325	0.793883930931652
ADGRG1-4	ADGRG1	x	GGAGGACCGGATCAACGCCA	102	102	150	137	112	121	121	208278537031645	0.0638	0.228481777382269	0.819	0.979	207188200730613	-0.0144	0.0782	10452151925684
ADGRG2-1	ADGRG2	x	AACCCTGCAAACCCTAAGTG	394	451	400	397	367	270	380	257978359661681	-0.268	-152623471949793	0.127	0.738	261804809671209	0.00449	-0.272	0.830470024090894
ADGRG2-2	ADGRG2	x	AGAGGAGGCTGGTCAGACAA	271	346	312	339	256	288	302	248000694295715	-0.0733	-0.396319890862476	0.692	0.961	249089445927398	0.000585	-0.0739	0.950461437779303
ADGRG2-3	ADGRG2	x	GGTAGTGTTGACATTCGCAG	180	153	50	206	110	172	145	216136800223497	0.35	0.934653040221292	0.35	0.88	210607751924896	-0.00983	0.36	127456062731926
ADGRG2-4	ADGRG2	x	TGGGAAAGCACAGTGGCCCG	165	158	230	172	173	163	177	224797326636181	-0.122	-0.525191189982845	0.599	0.945	226560387658504	-0.0069	-0.115	0.91891288347905
ADGRG3-1	ADGRG3	x	CAGATACTGGCTAAACTACG	397	396	347	393	332	281	358	255388302664387	-0.18	-104279653972373	0.297	0.857	257978359661681	0.00345	-0.183	0.882702996290655
ADGRG3-2	ADGRG3	x	GCGTGTGAGGATATGCACCG	276	248	272	279	243	221	256	240823996531185	-0.0994	-0.531573320240358	0.595	0.945	242379181301801	-0.00208	-0.0973	0.933421109750599
ADGRG3-3	ADGRG3	x	GTCTGTGGTTGTAGGTTCCG	350	483	401	452	434	446	428	263144376901317	0.11	0.697592125581957	0.485	0.919	261419390497756	0.00654	0.103	107922823650443
ADGRG3-4	ADGRG3	x	TGAGAGAAGACGATCTCCAG	363	325	344	429	336	386	364	256110138364906	0.157	0.968916040647559	0.333	0.872	253655844257153	0.00374	0.153	11149662187277
ADGRG4-1	ADGRG4	x	AGATACTAGACCAGTCTGAG	154	122	123	83	104	210	133	212385164096709	-0.00725	-0.0218989916598319	0.983	0.998	212385164096709	-0.0119	0.00465	0.994987288721857
ADGRG4-2	ADGRG4	x	TGACAGACGAATCAGCACAA	185	209	210	165	245	244	210	232221929473392	0.115	0.517060787420133	0.605	0.947	230391568390147	-0.00478	0.12	108297504552592
ADGRG4-3	ADGRG4	x	TGGGGTTACTGTATCAACTG	140	179	178	198	154	102	158	219865708695442	-0.131	-0.476918021295033	0.633	0.952	221923513401367	-0.00815	-0.123	0.913198250011992
ADGRG4-4	ADGRG4	x	TTTCCAAAGATGGAGTACCC	134	158	196	125	146	157	153	21846914308176	-0.189	-0.758717147689567	0.448	0.91	221129856728305	-0.00869	-0.18	0.877213548732822
ADGRG5-1	ADGRG5	x	CTGGGGCACCCGCTTCAGAG	163	123	174	199	88	160	151	217897694729317	-0.0414	-0.137837654172577	0.89	0.987	218563657696191	-0.00895	-0.0324	0.971711534984645
ADGRG5-2	ADGRG5	x	GAGAATATGCAGGTGTCCAG	243	246	337	266	355	363	302	248000694295715	0.253	126274529541755	0.207	0.808	243985879260072	0.000585	0.252	119168257457405
ADGRG5-3	ADGRG5	x	TCTTACGTACATCTCCCTCG	336	269	375	392	386	356	352	254654266347813	0.211	122461234833637	0.221	0.816	251410482097283	0.00316	0.208	115749021699012
ADGRG5-4	ADGRG5	x	TGGGCACGTGAACAACCTCA	150	168	99	156	131	123	138	213987908640124	-0.0244	-0.0890579214092785	0.929	0.992	214301480025409	-0.011	-0.0134	0.983229427149003
ADGRG6-1	ADGRG6	x	AACCCATTGGTAACCTACTG	306	317	327	346	216	271	297	247275644931721	-0.19	-0.964007164080799	0.335	0.873	250060235056919	0.000318	-0.19	0.876605721316035
ADGRG6-2	ADGRG6	x	CTAACAGAATCGATAAACAA	86	76	123	108	98	108	100	2	0.14	0.460506879294669	0.645	0.955	197772360528885	-0.0201	0.16	110190511587661
ADGRG6-3	ADGRG6	x	TATCTGAATGATATAACCGG	112	76	87	115	45	102	90	195424250943932	-0.0699	-0.187545632251762	0.851	0.982	19622114391106	-0.0234	-0.0465	0.952704032166723
ADGRG6-4	ADGRG6	x	TCCTTAAGGACACGGCAACT	193	211	172	233	144	201	192	228330122870355	0.005	0.021236421849954	0.983	0.998	228330122870355	-0.00592	0.0109	10034717485095
ADGRG7-1	ADGRG7	x	AGACAGTGCACATCCAACGT	179	239	193	256	296	258	237	23747483460101	0.407	203101456971234	0.0423	0.581	230891995552289	-0.00326	0.41	132592576029866
ADGRG7-2	ADGRG7	x	ATTCCAATAGACACAGGCAT	516	463	609	436	446	484	492	269196510276736	-0.217	-147033632788244	0.141	0.753	272372924337142	0.00893	-0.226	0.86035263061144
ADGRG7-3	ADGRG7	x	CATCACTAGTGCTACGCGAG	236	211	230	171	207	137	199	229885307640971	-0.395	-177541369345025	0.0758	0.665	235346741396548	-0.00544	-0.39	0.760489376620505
ADGRG7-4	ADGRG7	x	TTTGGGTAATCAATCAGTGG	233	301	241	198	168	137	213	232837960343874	-0.624	-282619718754114	0.00471	0.289	241218044778665	-0.00462	-0.619	0.648869383469592
ADGRL1-1	ADGRL1	x	ACGGACGCGCATCAAGAGCG	282	223	283	330	273	225	269	242975228000241	0.0714	0.351970120017955	0.725	0.967	241940496276989	-0.00129	0.0727	105073582945923
ADGRL1-2	ADGRL1	x	AGCCGGCAAGAACTACAACA	253	163	179	173	224	200	199	229885307640971	0.00484	0.0206626331474628	0.984	0.998	229739571100889	-0.00544	0.0103	10033604661023
ADGRL1-3	ADGRL1	x	CCTTCAAGATCATGTCACAG	210	239	203	194	228	269	224	235024801833416	0.0838	0.404440786055143	0.686	0.96	233712634101226	-0.00402	0.0878	105980585292529
ADGRL1-4	ADGRL1	x	TGTTGAAGGCATAGTCCACG	117	111	54	85	88	52	84	192427928606188	-0.326	-0.866941589761855	0.386	0.891	19731278535997	-0.0253	-0.301	0.797745239809033
ADGRL2-1	ADGRL2	x	AGCTGGACGGAGTTATAACA	143	96	120	149	144	136	131	211727129565576	0.257	0.983018084124049	0.326	0.869	207797319385866	-0.0123	0.269	119499120485678
ADGRL2-2	ADGRL2	x	CTCTTCGATTTGAAGCAACG	248	296	308	229	246	258	264	242160392686983	-0.217	-117587354782534	0.24	0.827	245331834004704	-0.00159	-0.215	0.86035263061144
ADGRL2-3	ADGRL2	x	GAGCGCTAACTATGGTCGGA	48	74	94	54	50	75	66	181954393554187	-0.271	-0.698556780897688	0.485	0.919	185733249643127	-0.0305	-0.241	0.828744904487992
ADGRL2-4	ADGRL2	x	TCTTTAACAAAGAAAGAACG	104	102	122	149	95	72	107	202938377768521	-0.0538	-0.167983087339337	0.867	0.984	203875258899202	-0.018	-0.0358	0.963395439729813
ADGRL3-1	ADGRL3	x	ACAGGTTATTGGTCAACACA	344	209	203	161	179	247	224	235024801833416	-0.365	-14444701214264	0.149	0.76	240140054078154	-0.00402	-0.361	0.77646887500104
ADGRL3-2	ADGRL3	x	AGGCAAATCTGACATAGACC	176	227	201	123	160	150	173	22380461031288	-0.48	-208082615214073	0.0374	0.562	230391568390147	-0.00712	-0.473	0.716977624007914
ADGRL3-3	ADGRL3	x	AGGCATCTGGCAGATAACAT	194	128	186	140	174	161	164	22148438480477	-0.0969	-0.392148930248018	0.695	0.962	222874245756426	-0.00767	-0.0892	0.935040007539787
ADGRL3-4	ADGRL3	x	CAAAGTTGTGGTCCGAAGGG	240	188	118	226	113	164	175	224303804868629	-0.118	-0.393501494597483	0.694	0.962	226007138798507	-0.00701	-0.111	0.921464186198704
ADGRL4-1	ADGRL4	x	AATGTGTCAGGTGATTACAG	288	301	320	266	223	213	268	242813479402879	-0.373	-203389854641153	0.042	0.58	24814426285023	-0.00135	-0.372	0.772175133091785
ADGRL4-2	ADGRL4	x	ATTTACATTAAGTCATCGAA	202	177	206	175	204	270	206	231386722036915	0.15	0.666619747034972	0.505	0.924	229003461136252	-0.00501	0.155	110956947206785
ADGRL4-3	ADGRL4	x	TGAAGCCTGCTATTGCAACA	539	502	450	546	378	460	479	268033551341456	-0.107	-0.666485378097367	0.505	0.924	269635638873333	0.00847	-0.115	0.928516852306729
ADGRL4-4	ADGRL4	x	TGAATTTGTATCAAACTCTG	264	279	305	333	281	272	289	246089784275655	0.0632	0.355195005339947	0.722	0.966	245127459753705	-0.000123	0.0633	104478059016941
ADGRV1-1	ADGRV1	x	GTTTAACATTGGTAGCCCAG	487	492	418	486	452	477	469	267117284271508	0.0185	0.131054694258298	0.896	0.988	266807515139452	0.00811	0.0104	101290579292308
ADGRV1-2	ADGRV1	x	TCATACCAAATAATCCATAG	192	267	297	332	318	389	299	247567118832443	0.459	231405938288477	0.0207	0.479	240140054078154	0.000425	0.459	137458869557203
ADGRV1-3	ADGRV1	x	TCCACATCATCCGATCAAGG	165	100	123	107	74	135	117	206818586174616	-0.296	-0.948853948568795	0.343	0.876	211171047087454	-0.0154	-0.281	0.814507563070215
ADGRV1-4	ADGRV1	x	TCTTTACTTAAAGGGCGCTG	163	168	150	127	123	165	149	217318626841227	-0.213	-0.87595820278	0.381	0.89	220502382165417	-0.00923	-0.204	0.862741344542656
ADH1A-1	ADH1A	x	ACAGACTTTCTCTAGAGGCG	58	120	53	84	73	73	77	188649072517248	-0.00626	-0.0164020825091906	0.987	0.998	188649072517248	-0.0274	0.0211	0.99567029894876
ADH1A-2	ADH1A	x	CACACTGAGGAATAGCGAGT	194	262	196	218	307	255	239	237839790094814	0.259	120680406209272	0.228	0.82	233712634101226	-0.00314	0.262	119664896323071
ADH1A-3	ADH1A	x	CCAGTGTAAGCAATCCTCAG	117	137	87	89	112	152	116	206445798922692	0.0499	0.163632465463836	0.87	0.985	205563312427284	-0.0156	0.0655	103519316723199
ADH1A-4	ADH1A	x	CCATGGTACCACTAACCACG	186	148	169	163	96	91	142	215228834438306	-0.523	-185328667420219	0.0638	0.641	222444673033626	-0.0103	-0.513	0.695923195915551
ADH1B-1	ADH1B	x	CACCTTCTCCCAGTACACGG	195	162	146	177	128	133	157	219589965240923	-0.2	-0.803821675761504	0.421	0.902	222444673033626	-0.00825	-0.192	0.870550563296124
ADH1B-2	ADH1B	x	CTGTCACACAGATGACCACG	140	164	153	139	105	110	135	213033376849501	-0.368	-145200982275128	0.146	0.759	218279494535019	-0.0115	-0.356	0.774855930959171
ADH1B-3	ADH1B	x	GTCTGCAGTTAACGTTGCCA	1	1	2	1	1	2	1	0	1.02e-06	4.60843e+07	1	NA	0.1249387366083	-0.0203	0.0203	100000070701037
ADH1B-4	ADH1B	x	TGGAGCAGCCAGAATCATTG	180	141	232	189	128	242	185	226717172840301	0.0156	0.0571827739025159	0.954	0.995	226560387658504	-0.00643	0.022	101087176882701
ADH1C-1	ADH1C	x	AGCAGCCAGAATCATTGCTG	301	249	343	331	256	285	294	246834733041216	-0.0343	-0.180086404960472	0.857	0.983	247373020416888	0.000154	-0.0345	0.976505449248655
ADH1C-2	ADH1C	x	CACCTTCTCCCAGTACACAG	208	225	245	198	247	286	235	237106786227174	0.109	0.525980620046131	0.599	0.945	23541084391474	-0.00339	0.112	107848043169445
ADH1C-3	ADH1C	x	GGTAGAGGTTGCACCTCCTA	73	56	62	86	81	87	74	186923171973098	0.411	124701609467209	0.212	0.811	180391211252807	-0.0282	0.439	132960710818171
ADH1C-4	ADH1C	x	TGAAAACATAGGTCACCCCA	278	294	288	271	304	321	293	246686762035411	0.0592	0.345129395213562	0.73	0.967	245737719652391	9.9e-05	0.0591	1041887855323
ADH4-1	ADH4	x	AAATTTAGAATCGATAACAG	142	110	154	108	143	164	137	213672056715641	0.0316	0.117296698510567	0.907	0.989	213140477885753	-0.0112	0.0428	102214509252327
ADH4-2	ADH4	x	TACATTCTCTCAGTACACTG	191	241	211	185	189	227	207	231597034545692	-0.0975	-0.464214117894507	0.642	0.954	233108971820456	-0.00495	-0.0926	0.934651216185318
ADH4-3	ADH4	x	TCAACCTCTTCAATGCAAAG	118	141	171	142	150	168	148	217026171539496	0.0973	0.391229259326488	0.696	0.962	215634720085992	-0.00938	0.107	10697695170754
ADH4-4	ADH4	x	TTCCCACACAAATTTGTGAG	141	185	157	197	157	153	165	221748394421391	0.07	0.295447181110543	0.768	0.973	220682587603185	-0.0076	0.0776	104971668362307
ADH5-1	ADH5	x	GCTGGAATTGTGGAAAGTGT	148	134	125	176	175	129	148	217026171539496	0.238	0.961100030832849	0.337	0.873	213247315450556	-0.00938	0.247	117935659226122
ADH5-2	ADH5	x	TCAGGGTATAGGCATCGGTG	33	47	76	59	52	73	57	175587485567249	0.238	0.564889552495292	0.572	0.941	17160033436348	-0.0336	0.272	117935659226122
ADH5-3	ADH5	x	TGCTTCCCGGATCATTGGTG	169	175	248	134	165	147	173	22380461031288	-0.409	-169297772424153	0.0905	0.688	229520045200326	-0.00712	-0.402	0.753145233316906
ADH5-4	ADH5	x	TGGGTTTACTAAAATCCTGA	126	125	152	118	72	127	120	207918124604762	-0.346	-118422192840954	0.236	0.825	212818379142145	-0.0147	-0.331	0.786762445353566
ADH6-1	ADH6	x	AAAACCCAACTGATGTCTGA	829	952	1022	742	894	866	884	294645226501307	-0.164	-135962250492842	0.174	0.783	297050184304062	0.0191	-0.183	0.892546971472977
ADH6-2	ADH6	x	CCTTCATGGCCCAAGATGGT	545	558	485	608	511	678	564	275127910398334	0.178	124661632413142	0.213	0.811	272372924337142	0.0113	0.167	11313144628459
ADH6-3	ADH6	x	TAAGCACAGTGAAACCAGGT	361	455	431	347	345	442	397	259879050676312	-0.137	-0.818097452067351	0.413	0.9	261874519875888	0.00525	-0.142	0.909408251800733
ADH6-4	ADH6	x	TGCTGCAATCAATACTGCCA	395	416	292	405	342	483	389	258994960132571	0.157	0.850990647369668	0.395	0.894	256545425772053	0.0049	0.152	11149662187277
ADH7-1	ADH7	n	AAGACGACGCAAGTGGAACC	313	338	250	248	267	297	286	245636603312904	-0.15	-0.800602775456266	0.423	0.902	24776035362594	-0.000293	-0.15	0.90125046261083
ADH7-2	ADH7	n	CCTACTCGCTCCTAATGCAA	122	146	125	139	111	130	129	211058971029925	-0.0485	-0.18937066700809	0.85	0.982	211727129565576	-0.0127	-0.0358	0.966941155268228
ADH7-3	ADH7	n	CTTGGGACTGATACACTCAG	140	112	149	201	165	212	163	221218760440396	0.527	221309790278321	0.0269	0.516	212602311790052	-0.00774	0.535	144092974883792
ADH7-4	ADH7	n	TACATTTACCGAGTACACAG	40	59	35	70	64	53	54	173239375982297	0.481	118612478075717	0.236	0.825	164998354364515	-0.0348	0.516	139571076412217
ADHFE1-1	ADHFE1	x	AACCGGGAGTGAAACTACTG	284	204	467	314	338	338	324	251054501020661	0.0519	0.216801828957945	0.828	0.98	250288211686408	0.00174	0.0502	103662924486557
ADHFE1-2	ADHFE1	x	AGGATCAATCAGTCCCAGTG	574	445	716	648	610	579	595	277451696572855	0.0824	0.512076031854345	0.609	0.947	276217822440723	0.0122	0.0702	105877790975264
ADHFE1-3	ADHFE1	x	TGTCGGTGGTGGCTCTACCA	31	11	15	36	24	19	23	136172783601759	0.471	0.729078326098078	0.466	0.915	127875360095283	-0.0528	0.524	138606988565041
ADHFE1-4	ADHFE1	x	TTTGGGCTATCCACGCGCTG	85	174	218	251	187	199	186	226951294421792	0.417	14172196951852	0.156	0.767	220139712432045	-0.00636	0.423	133514830329591
ADI1-1	ADI1	x	CAGTGGGTACTTCGATGTGA	188	177	197	145	168	183	176	224551266781415	-0.18	-0.819409187214761	0.413	0.9	22726150608494	-0.00696	-0.173	0.882702996290655
ADI1-2	ADI1	x	CTAGATTAAGATGTTCTACG	88	172	84	113	63	74	99	199563519459755	-0.46	-126983200415924	0.204	0.806	205943718785187	-0.0204	-0.44	0.726986258660155
ADI1-3	ADI1	x	CTGGTATATGGACGACGCCC	355	366	298	321	308	319	328	251587384371168	-0.104	-0.627940619816007	0.53	0.93	253105292928676	0.00194	-0.106	0.930449657703015
ADI1-4	ADI1	x	TATGGTTATGATGTCCATCC	202	155	157	95	166	149	154	218752072083646	-0.326	-121349333771366	0.225	0.818	223384186427561	-0.00857	-0.317	0.797745239809033
ADIG-1	ADIG	x	AATGTGAGGTCGTTCACCAG	360	518	446	314	394	326	393	259439255037543	-0.357	-202742899062394	0.0426	0.582	264476673038402	0.00508	-0.362	0.780786492607391
ADIG-2	ADIG	x	ATAACAACAGCAAACCCACA	359	286	350	271	251	278	299	247567118832443	-0.315	-178671727399387	0.074	0.664	252070182602606	0.000425	-0.315	0.803850990743151
ADIG-3	ADIG	x	GGAGGCAGAACCAGAAAACC	55	49	54	79	70	26	56	17481880270062	0.147	0.32799975931977	0.743	0.969	172153583223476	-0.034	0.181	110726458448428
ADIG-4	ADIG	x	TCGTATCTCCACAGATTCAG	235	303	228	280	290	231	261	241664050733828	0.0645	0.325822927284303	0.745	0.97	240710751491294	-0.00177	0.0663	104572245719628
ADIPOQ-1	ADIPOQ	x	GAAACCACGACTCAAGGGCC	144	247	241	262	304	329	254	240483371661994	0.502	222864815988937	0.0258	0.509	232359582356272	-0.00221	0.504	141617543821454
ADIPOQ-2	ADIPOQ	x	GTTGCAGTGGAATTTACCAG	92	121	105	107	119	110	109	203742649794062	0.0794	0.287737731365668	0.774	0.973	202530586526477	-0.0174	0.0968	105657853051649
ADIPOQ-3	ADIPOQ	x	TACCGCTCAGCATTCAGTGT	215	149	152	118	92	101	138	213987908640124	-0.73	-274698961435984	0.00601	0.319	223552844690755	-0.011	-0.719	0.60290391384538
ADIPOQ-4	ADIPOQ	x	TGGATTCCCGGAAAGCCTCG	149	108	130	91	128	114	120	207918124604762	-0.217	-0.7820676294327	0.434	0.906	211058971029925	-0.0147	-0.202	0.86035263061144
ADIPOR1-1	ADIPOR1	x	CCAGGACACAGACGATGGAG	184	142	162	174	240	205	184	226481782300954	0.343	150315281107068	0.133	0.745	221129856728305	-0.00649	0.349	126839139932587
ADIPOR1-2	ADIPOR1	x	GACAACGACTATCTGCTACA	336	435	452	471	469	573	456	265896484266444	0.307	189627915276477	0.0579	0.628	261030520231662	0.00762	0.299	123713247868717
ADIPOR1-3	ADIPOR1	x	GTATATGTTCTAGGTCTGGG	50	111	91	99	88	155	99	199563519459755	0.441	123313350273493	0.218	0.815	192427928606188	-0.0204	0.461	135754497988001
ADIPOR1-4	ADIPOR1	x	TTTCTCTGAATGACAATAGA	190	204	179	228	196	175	195	229003461136252	0.064	0.300557987973585	0.764	0.973	228103336724773	-0.0057	0.0697	104536010020516
ADIPOR2-1	ADIPOR2	x	ACAGGAAGAATACACAACCT	144	78	115	118	121	115	115	206069784035361	0.071	0.240799817091372	0.81	0.978	205050864615168	-0.0158	0.0868	105044454401075
ADIPOR2-2	ADIPOR2	x	AGTCTACTGCCACTCAGAGG	197	272	194	152	144	105	177	224797326636181	-0.725	-294424789437501	0.00324	0.251	234439227368511	-0.0069	-0.718	0.604997044609646
ADIPOR2-3	ADIPOR2	x	ATGATGGGCTTGTAAGAGAG	405	375	418	397	387	316	383	258319877396862	-0.123	-0.773500495007729	0.439	0.907	260133556333363	0.00463	-0.128	0.918276162300924
ADIPOR2-4	ADIPOR2	x	CTCATGATGTACTACCAGAC	128	99	107	135	69	130	111	204532297878666	3.39e-07	1.07316e+08	1	1	20466252120919	-0.0169	0.0169	100000023497692
ADIRF-1	ADIRF	x	AGCGGCAGCTCAGCAAGTGG	220	169	142	255	112	137	172	223552844690755	-0.0753	-0.249265789107066	0.803	0.977	224797326636181	-0.00718	-0.0681	0.949144731329882
ADIRF-2	ADIRF	x	AGTGGTGGACCAGGCCACAG	112	91	73	102	69	80	88	194448267215017	-0.137	-0.420098281764138	0.674	0.959	196378782734556	-0.024	-0.113	0.909408251800733
ADIRF-3	ADIRF	x	CCAGCTGGCCAAGACCACCC	132	199	204	148	137	174	166	222010808804005	-0.221	-0.883339047955826	0.377	0.888	225123252730157	-0.00753	-0.213	0.857970530428691
ADIRF-4	ADIRF	x	GCCACAGAGGCGGGGCAGAA	111	118	117	74	85	122	104	201703333929878	-0.3	-100601189864301	0.314	0.864	206195484407311	-0.0189	-0.281	0.812252396356236
ADK-1	ADK	x	AAAGTCGAATATCATGCTGG	289	399	417	430	310	359	367	256466606425209	-0.00785	-0.0417347931428058	0.967	0.996	256624102330147	0.00389	-0.0117	0.994573571177643
ADK-2	ADK	x	ACAGCAGAGATGTCAAGCAG	333	416	425	452	370	434	405	260745502321467	0.0974	0.59953486036184	0.549	0.936	259254684219193	0.00559	0.0918	106984367041779
ADK-3	ADK	x	GTAGTAATGAGCATCCACAT	154	201	184	211	232	184	194	228780172993023	0.218	100048376011073	0.317	0.864	225446751046708	-0.00577	0.224	116312004154785
ADK-4	ADK	x	TCTGGAGAAAAACTGGATGT	199	254	248	200	212	216	222	234635297445064	-0.159	-0.791465134427338	0.429	0.904	2368596763247	-0.00413	-0.155	0.895645670090849
ADM-1	ADM	x	CGACGCGACATCCAACCGAG	118	115	174	192	154	212	161	220682587603185	0.455	177160956110921	0.0765	0.666	213247315450556	-0.00789	0.463	13707828049797
ADM-2	ADM	x	CTAGGAAGGCGAGCGAACCC	82	111	154	135	116	135	122	208635983067475	0.154	0.524948105120241	0.6	0.945	206320822007121	-0.0142	0.168	111265012058483
ADM2-1	ADM2	x	ACCCGCGACCCGTCAAACCC	664	876	707	642	614	684	698	284385542262316	-0.212	-159444364077416	0.111	0.72	287448181769947	0.015	-0.227	0.863339558574412
ADM2-2	ADM2	x	AGCTTCCAGACCACAGGTCG	189	157	133	185	165	175	167	222271647114758	0.132	0.567249455152297	0.571	0.94	22032142586949	-0.00747	0.139	109581176644769
ADM2-3	ADM2	x	GAGAGGCTGACCCATAACAG	271	284	308	307	332	326	305	248429983934679	0.161	0.965696356651569	0.334	0.872	245888954099555	0.000743	0.16	111806185096586
ADM2-4	ADM2	x	GAGGAGGCTGATGCAACCCA	118	76	155	208	172	165	149	217318626841227	0.643	227580727353492	0.0229	0.49	206570417223952	-0.00923	0.652	156157298521478
ADM-3	ADM	x	GCACCGTGCACGTCCCGAAG	198	193	222	246	168	286	219	234044411484012	0.191	0.836404993547336	0.403	0.896	231033921979875	-0.00429	0.195	114155470712677
ADM-4	ADM	x	TCTGGCGGTAGCGCTTGACT	123	125	82	171	171	107	130	211394335230684	0.444	151954550414245	0.129	0.74	204139268515822	-0.0125	0.456	136037085240596
ADM5-1	ADM5	x	GGCGGCGCCCATAGCTGTAG	275	202	152	190	185	230	206	231386722036915	-0.0561	-0.230582486452508	0.818	0.979	232152939072561	-0.00501	-0.0511	0.961860781245216
ADM5-2	ADM5	x	GGTGGGTCCGGCATACGCCC	20	11	38	33	34	33	28	144715803134222	0.535	0.913240472431254	0.361	0.883	136172783601759	-0.0488	0.584	144894215455488
ADM5-3	ADM5	x	TCCAGTATATGATCTCCGCC	152	206	226	151	216	151	184	226481782300954	-0.173	-0.702030751074516	0.483	0.918	228929159239274	-0.00649	-0.167	0.88699630515215
ADM5-4	ADM5	x	TCTCCACCAAGGAGCCCTCG	1	1	2	1	11	2	3	0.477121254719662	1.81	105180500954916	0.293	NA	0.1249387366083	-0.0617	1.87	350642288526414
ADNP-1	ADNP	x	GTTGGTCAGTCAATGAGACT	249	250	237	214	207	179	223	234830486304816	-0.295	-151341531316091	0.13	0.743	238975655961784	-0.00407	-0.291	0.815072332402625
ADNP-2	ADNP	x	TCAGATTGTATGTAGTTACC	212	200	220	126	169	193	187	22718416065365	-0.373	-16302172789368	0.103	0.709	232359582356272	-0.00629	-0.367	0.772175133091785
ADNP2-1	ADNP2	x	GCTTATGCGCTACCTCCATG	329	311	354	180	405	320	316	24996870826184	-0.135	-0.572532819998706	0.567	0.939	252026512967765	0.00132	-0.136	0.910669833591978
ADNP2-2	ADNP2	x	GGCGAACAGTCTGATTTATG	114	85	105	94	102	149	108	203342375548695	0.183	0.607851579782985	0.543	0.934	200575232888909	-0.0177	0.201	113524210214606
ADNP2-3	ADNP2	x	TGCAGAGATAACCCTCAATG	189	134	196	103	85	173	147	216731733474818	-0.524	-175544228608232	0.0792	0.671	22380461031288	-0.00952	-0.514	0.695440985854994
ADNP2-4	ADNP2	x	TGGGATTCCAACCTACACGC	357	263	300	305	227	213	278	244404479591808	-0.304	-149076764915223	0.136	0.748	248666657262589	-0.000754	-0.303	0.810003473632046
ADNP-3	ADNP	x	TGGAGACTGATTAAGCCGAG	120	89	97	135	102	100	107	202938377768521	0.139	0.479954455029029	0.631	0.952	200860017176192	-0.018	0.157	110114159809796
ADNP-4	ADNP	x	TTGCACATCACTTACGAGAG	239	253	212	283	220	312	253	240312052117582	0.211	105438449124819	0.292	0.855	237045140442245	-0.00227	0.213	115749021699012
ADO-1	ADO	x	ATGGACAAGCTAGACGCGGG	116	82	137	60	57	64	86	193449845124357	-0.888	-270657854797719	0.0068	0.331	204792355231718	-0.0247	-0.863	0.540362701019676
ADO-2	ADO	x	CCCGGGAGCGAGAAGCCGTG	108	81	42	144	104	72	92	196378782734556	0.47	12221235556086	0.222	0.817	188649072517248	-0.0227	0.493	138510946811092
ADO-3	ADO	x	CGATGTTCAAGTCCTCGGCG	91	58	73	82	66	121	82	191381385238372	0.277	0.782382603512483	0.434	0.906	186923171973098	-0.026	0.303	121167266043024
ADO-4	ADO	x	CGTCGCGATCGGAAGCGCCG	135	169	216	153	128	171	162	220951501454263	-0.202	-0.79527537095431	0.426	0.903	223888208891514	-0.00781	-0.194	0.869344560090022
ADORA1-1	ADORA1	x	AGGGGTCAGTCCCACCACGA	247	143	160	133	127	115	154	218752072083646	-0.553	-207123865508221	0.0383	0.565	226324143477458	-0.00857	-0.544	0.681601303641254
ADORA1-2	ADORA1	x	GAGGACCATGAGGAGAAGCG	244	298	319	191	206	248	251	239967372148104	-0.417	-208481740512101	0.0371	0.561	245788189673399	-0.00239	-0.415	0.748980467212091
ADORA1-3	ADORA1	x	GGAGAGGGATCTTGACCCGG	145	135	146	166	142	154	148	217026171539496	0.117	0.499735627469529	0.617	0.949	215228834438306	-0.00938	0.126	108447740884306
ADORA1-4	ADORA1	x	GGCAGCCAACGGCAGCATGG	230	230	292	250	252	250	251	239967372148104	1.44e-07	7.56893e+07	1	1	239909658587198	-0.00239	0.00239	10000000998132
ADORA2A-1	ADORA2A	x	AAGCAGTTGATGATGTGTAG	281	294	345	249	399	285	309	248995847942483	0.0202	0.100090082631837	0.92	0.992	248666657262589	0.000953	0.0192	10141000541646
ADORA2A-2	ADORA2A	x	ATGCTAGGTTGGAACAACTG	139	232	133	196	120	225	174	22405492482826	0.102	0.352204295615622	0.725	0.967	222530928172586	-0.00707	0.109	107326028639345
ADORA2A-3	ADORA2A	x	GCGGCGGCCGACATCGCAGT	130	93	156	121	156	96	125	209691001300806	-0.023	-0.0776041908333037	0.938	0.993	210151795524841	-0.0136	-0.0094	0.9841840220338
ADORA2A-4	ADORA2A	x	TGGCTTGGTGACCGGCACGA	168	73	176	143	167	191	153	21846914308176	0.265	0.857550848984545	0.391	0.893	214301480025409	-0.00869	0.274	120163604952685
ADORA2B-1	ADORA2B	x	CACCAGCATTATAAGCAGTG	364	382	367	414	361	337	371	256937390961505	-0.0013	-0.00825918820594293	0.993	0.998	256937390961505	0.00408	-0.00538	0.999099314526154
ADORA2B-2	ADORA2B	x	GGTATAAAAGTTTGGTCACG	113	148	182	146	101	65	126	210037054511756	-0.506	-156999975794776	0.116	0.727	216928247150341	-0.0133	-0.493	0.70417211345604
ADORA2B-4	ADORA2B	x	TGGAGTCAATCCGATGCCAA	246	217	176	298	256	244	240	238021124171161	0.321	157110305837206	0.116	0.726	232837960343874	-0.00308	0.324	124919612565338
ADORA3-1	ADORA3	x	ATGGCGCACATGACAACCAG	346	302	281	235	298	310	295	246982201597816	-0.14	-0.756408896490185	0.449	0.91	249089445927398	0.000209	-0.14	0.907519155317161
ADORA3-2	ADORA3	x	ATTGGACTCTGCGCCATAGT	106	169	154	148	145	183	151	217897694729317	0.15	0.57692078534662	0.564	0.939	215533603746506	-0.00895	0.159	110956947206785
ADORA3-3	ADORA3	x	GACATTTCTGTGGTACTCTG	225	170	249	212	206	301	227	235602585719312	0.159	0.695163728135266	0.487	0.919	233176461264015	-0.00385	0.163	111651296198257
ADORA3-4	ADORA3	x	GATGCCCAGGCTGACAACAA	367	331	362	379	415	333	364	256110138364906	0.0884	0.550901033350311	0.582	0.943	254818461054511	0.00374	0.0847	106319041247201
ADPGK-1	ADPGK	x	AAGATGAATCGGTTGGCATG	169	228	190	261	187	253	215	233243845991561	0.256	115966596407844	0.246	0.83	229151684652795	-0.00451	0.261	119416318707459
ADPGK-2	ADPGK	x	ACTCTCTTACAGCACTATGT	235	186	134	160	199	185	183	226245108973043	-0.0289	-0.11641067210582	0.907	0.989	226717172840301	-0.00655	-0.0223	0.980167353011025
ADPGK-3	ADPGK	x	CCATCATGTGCAATCCAGAG	233	131	228	195	153	225	194	228780172993023	-0.0471	-0.181162377330089	0.856	0.983	229520045200326	-0.00577	-0.0413	0.967879936243687
ADPGK-4	ADPGK	x	GCTGGCCAGTATGACTAACA	116	31	42	82	52	83	68	183250891270624	0.199	0.424732133762055	0.671	0.958	179934054945358	-0.0299	0.229	1147902413855
ADPRH-1	ADPRH	x	AAGTGAGCATCGAGAGTGGT	372	386	364	413	334	335	367	256466606425209	-0.0524	-0.326343586583833	0.744	0.97	257287160220048	0.00389	-0.0563	0.964330778251433
ADPRH-2	ADPRH	x	AGTCTTGGTAATGCTTAGCA	230	255	261	324	229	290	265	242324587393681	0.176	0.906248566361448	0.365	0.884	239561757275301	-0.00153	0.178	112974721457012
ADPRH-3	ADPRH	x	ATAGCAGACCACCCTTGCAG	132	176	129	118	126	154	139	214301480025409	-0.135	-0.520218658837132	0.603	0.946	216336018225076	-0.0108	-0.124	0.910669833591978
ADPRH-4	ADPRH	x	GGAGAAGATACACCGGCAGT	184	208	168	188	247	194	198	229666519026153	0.168	0.769278512378059	0.442	0.908	227106677228654	-0.0055	0.174	112349990303165
ADPRHL1-1	ADPRHL1	x	CATGCACATCGCAACCGCCG	131	98	140	129	48	56	100	2	-0.663	-177030727431507	0.0767	0.666	20899051114394	-0.0201	-0.643	0.6315636309229
ADPRHL1-2	ADPRHL1	x	CTCCTGGCGAGAGTACGAGG	178	164	105	140	121	117	138	213987908640124	-0.242	-0.883699412487437	0.377	0.888	217318626841227	-0.011	-0.231	0.845572287377517
ADPRHL1-3	ADPRHL1	x	GGAGATGGTGAGATGCTATG	408	389	498	377	424	371	411	261384182187607	-0.144	-0.910145067077964	0.363	0.884	263514851369761	0.00584	-0.15	0.905006462882905
ADPRHL1-4	ADPRHL1	x	TGCGGCGAACGACACAAACA	233	304	210	176	211	205	223	234830486304816	-0.336	-156769670927265	0.117	0.728	239619934709574	-0.00407	-0.332	0.792234810924969
ADPRHL2-1	ADPRHL2	x	ATGGCAATGGAGGTGCCATG	228	104	141	142	202	142	160	220411998265593	0.0391	0.131640709538331	0.895	0.988	219773988601815	-0.00797	0.0471	102747265588821
ADPRHL2-2	ADPRHL2	x	CAGGACTGACGTCAGGTCGA	233	304	146	130	200	294	218	23384564936046	-0.13	-0.437067156444138	0.662	0.957	235729944896187	-0.00434	-0.126	0.9138314502294
ADPRHL2-3	ADPRHL2	x	GATGGCGCCATTGTAACCCA	215	143	181	174	169	188	178	225042000230889	-0.0216	-0.0930795154070542	0.926	0.992	225446751046708	-0.00685	-0.0148	0.985139543712862
ADPRHL2-4	ADPRHL2	x	TACAAGAAAGACCCTGACAG	100	93	125	107	80	78	97	198677173426624	-0.263	-0.866619351756128	0.386	0.891	202530586526477	-0.021	-0.242	0.833353207159218
ADPRM-1	ADPRM	x	AACATCTGCGATGACGCCAA	400	327	235	453	270	457	357	255266821611219	0.295	130132643769974	0.193	0.798	250605381731815	0.0034	0.292	12268849772538
ADPRM-2	ADPRM	x	CCATTAAACTGGACAAACTG	337	386	362	331	304	292	335	252504480703685	-0.227	-140258479345318	0.161	0.771	255830848346489	0.0023	-0.229	0.854409740889733
ADPRM-3	ADPRM	x	TAAGCATAATAATCTTCTGA	211	171	161	116	100	180	156	219312459835446	-0.455	-167597825870761	0.0937	0.694	225767857486918	-0.00835	-0.447	0.729510172120088
ADPRM-4	ADPRM	x	TTGTTATGGACATGTTCAAG	197	244	161	133	135	165	172	223552844690755	-0.475	-196663313361296	0.0492	0.603	230247523653816	-0.00718	-0.468	0.71946679000541
ADRA1A-1	ADRA1A	x	ATCTCCATCGACCGCTACAT	300	249	295	253	289	239	271	243296929087441	-0.112	-0.606806654883114	0.544	0.935	244922119190599	-0.00117	-0.111	0.925304428037852
ADRA1A-2	ADRA1A	x	CCAAGACGCACTTCTCAGTG	629	512	618	449	567	571	558	274663419893758	-0.148	-101018336472707	0.312	0.863	27681445847378	0.0111	-0.159	0.90250072746243
ADRA1A-3	ADRA1A	x	GGGTCCAATGGATATGACCA	98	98	133	168	81	105	114	205690485133647	0.106	0.328613360092831	0.742	0.969	204007464323031	-0.0161	0.122	10762401247838
ADRA1A-4	ADRA1A	x	TGGCCTCAAGACCGACAAGT	450	407	387	401	447	442	422	262531245096167	0.0524	0.356142685634229	0.722	0.966	261769912563514	0.0063	0.0461	10369885754484
ADRA1B-1	ADRA1B	x	CATCCTAGTCATCTTGTCTG	144	204	192	184	201	153	180	225527250510331	-0.00535	-0.0228266026708707	0.982	0.998	225527250510331	-0.00673	0.00138	0.996298529975709
ADRA1B-2	ADRA1B	x	CCATTCCAAGAACTTTCACG	172	82	184	163	174	139	152	218184358794477	0.12	0.403631066374566	0.686	0.96	216435285578444	-0.00882	0.129	108673486252606
ADRA1B-3	ADRA1B	x	CTCCATCGATCGCTACATCG	356	397	301	412	286	392	357	255266821611219	0.0485	0.261145729144411	0.794	0.976	254571935615687	0.0034	0.0451	103418909677353
ADRA1B-4	ADRA1B	x	TCTTGGCCACTATATAGACA	159	127	173	144	79	127	135	213033376849501	-0.391	-1367016042946	0.172	0.781	21846914308176	-0.0115	-0.38	0.762600826628142
ADRA1D-1	ADRA1D	x	ATCTCCGTGGACCGGTACGT	155	155	173	160	168	233	174	22405492482826	0.216	0.915284471777	0.36	0.883	220682587603185	-0.00707	0.223	116150873192572
ADRA1D-2	ADRA1D	x	CGGCGACGTGAATGGCACGG	233	129	220	254	183	256	212	232633586092875	0.252	100093433039707	0.317	0.864	228780172993023	-0.00467	0.257	119085684936497
ADRA1D-3	ADRA1D	x	TACCGCAGAAGCGCTCGTCA	122	88	84	98	106	80	96	198227123303957	-0.0499	-0.162633037552853	0.871	0.985	199122607569249	-0.0214	-0.0285	0.966003284849634
ADRA1D-4	ADRA1D	x	TGCGCGCGACCACGTACACG	45	63	27	58	25	56	46	166275783168157	0.0421	0.0855929993599961	0.932	0.992	165321251377534	-0.0382	0.0803	102961144818789
ADRA2A-1	ADRA2A	x	ATGATGGCCTTGATGCGGCG	256	324	247	259	179	254	253	240312052117582	-0.257	-12164724433101	0.224	0.818	244038425483288	-0.00227	-0.255	0.836826242683391
ADRA2A-2	ADRA2A	x	GACGAGCACGTTGCCGAACA	409	382	358	421	427	349	391	259217675739587	0.059	0.37604888726688	0.707	0.964	258319877396862	0.00499	0.054	104174342900822
ADRA2A-3	ADRA2A	x	TCCAGCGCGTCGGTGTCGCG	106	91	125	137	157	190	134	212710479836481	0.588	222339052199924	0.0262	0.512	203073461697617	-0.0117	0.6	150316147806556
ADRA2A-4	ADRA2A	x	TGGTCGTTGATCTCGCAGCG	329	268	299	274	299	307	296	247129171105894	-0.026	-0.149245219124804	0.881	0.986	247518675494246	0.000263	-0.0263	0.982139595263391
ADRA2B-1	ADRA2B	x	CAGCCCCGACCCGACCATGG	246	239	209	289	167	205	226	23541084391474	-0.0703	-0.306357044407684	0.759	0.972	236423821573519	-0.00391	-0.0664	0.952439923136179
ADRA2B-2	ADRA2B	x	CGGACACTCGAAGTCCACTG	199	152	202	179	171	155	176	224551266781415	-0.131	-0.57839826984974	0.563	0.939	226560387658504	-0.00696	-0.124	0.913198250011992
ADRA2B-3	ADRA2B	x	TGGAGTTGTACTCCAGCGCG	377	218	304	251	374	334	310	249136169383427	0.0932	0.424126145694015	0.671	0.958	247663843701357	0.00101	0.0922	106673365126649
ADRA2B-4	ADRA2B	x	TGGTCGCCCTTGTAGATGAG	322	410	496	350	503	354	406	260852603357719	-0.0249	-0.127886479435041	0.898	0.988	261207711208549	0.00563	-0.0305	0.982888724838989
ADRA2C-1	ADRA2C	x	ACACAGATGCACGATCGACG	299	145	220	157	215	219	209	232014628611105	-0.168	-0.638498399561948	0.523	0.929	234504682464835	-0.00484	-0.163	0.890075733252496
ADRA2C-2	ADRA2C	x	ATGGTGGCCTTGACGCGGCG	84	33	99	70	70	76	72	185733249643127	5.13e-07	1.25769e+08	1	1	185733249643127	-0.0288	0.0288	100000035558457
ADRA2C-3	ADRA2C	x	CTACGCGCGCATCTACCGAG	187	106	134	142	122	212	150	217609125905568	0.157	0.536801052258925	0.591	0.944	215330662030536	-0.00909	0.166	11149662187277
ADRA2C-4	ADRA2C	x	TGTACCAGGTCTCGTCGTTG	310	275	320	264	289	272	288	245939248775923	-0.134	-0.772904804084858	0.44	0.907	247952732448554	-0.00018	-0.134	0.911301280637142
ADRB1-1	ADRB1	x	CGCACGCCCGTTGGCCAGCG	168	144	87	101	78	103	114	205690485133647	-0.501	-160800323210555	0.108	0.714	212385164096709	-0.0161	-0.485	0.706616821941365
ADRB1-2	ADRB1	x	GTAGAAGGAGACTACGGACG	46	56	92	48	94	116	75	18750612633917	0.411	100652870424216	0.314	0.863	181068047521056	-0.028	0.439	132960710818171
ADRB1-3	ADRB1	x	TGGCCATCGCCAAGACGCCG	215	184	169	213	222	164	194	228780172993023	0.0767	0.344617607194901	0.73	0.967	227722708099136	-0.00577	0.0825	105460299573763
ADRB1-4	ADRB1	x	TGGCCCACACGGTGCACACG	81	143	69	79	106	125	100	2	0.0814	0.236199839558687	0.813	0.979	198974636563445	-0.0201	0.102	105804427511742
ADRB2-1	ADRB2	x	ATCCACTGCGATCACGCACA	411	389	420	464	374	338	399	260097289568675	-0.053	-0.325025266230456	0.745	0.97	260923857595509	0.00534	-0.0583	0.963929807740643
ADRB2-2	ADRB2	x	CAGACGCTCGAACTTGGCAA	82	186	138	104	70	143	120	207918124604762	-0.357	-103128642966629	0.302	0.859	213140477885753	-0.0147	-0.342	0.780786492607391
ADRB2-3	ADRB2	x	CCCTTTCCTGCGTGACGTCG	263	383	217	184	230	223	250	239794000867204	-0.438	-191281237482223	0.0558	0.623	245888954099555	-0.00245	-0.436	0.738157202841417
ADRB2-4	ADRB2	x	GGGAACGTAGAAGGACACGA	426	513	382	482	543	487	472	267394199863409	0.195	127596233361427	0.202	0.805	264378156289486	0.00821	0.187	114472416059868
ADRB3-1	ADRB3	x	ACCAGTGCGCCGTAACGCAG	265	274	280	246	271	255	265	242324587393681	-0.0853	-0.484350076004448	0.628	0.951	243616264704076	-0.00153	-0.0838	0.942588509767308
ADRB3-2	ADRB3	x	CAGCGAAGTCACGAACACGT	51	122	91	94	112	117	98	199122607569249	0.291	0.847405144551856	0.397	0.894	194448267215017	-0.0207	0.312	122348804113187
ADRB3-3	ADRB3	x	CCAATACCGCCAACACCAGT	188	241	187	226	136	205	197	229446622616159	-0.12	-0.494523538544126	0.621	0.95	231245945744476	-0.00557	-0.114	0.920187650624875
ADRB3-4	ADRB3	x	GATGGGCGCAAACGACACCG	208	134	204	184	208	183	187	22718416065365	0.0747	0.317070270615983	0.751	0.971	226007138798507	-0.00629	0.081	105314201845767
ADRBK1-1	ADRBK1	x	CATCGCATCATTGGGCGCGG	215	211	265	168	279	215	226	23541084391474	-0.0619	-0.271903764561658	0.786	0.975	236235679265454	-0.00391	-0.058	0.958001619533531
ADRBK1-2	ADRBK1	x	CCAGGTCCGAGATCCGCACG	61	68	100	121	74	110	89	194939000664491	0.413	121792531930216	0.223	0.817	188271422762023	-0.0237	0.437	133145161323637
ADRBK1-3	ADRBK1	x	CTCCTCATAGAATTCCACCA	125	172	161	185	176	172	165	221748394421391	0.219	0.943091128392563	0.346	0.877	218374422328421	-0.0076	0.227	116392653440214
ADRBK1-4	ADRBK1	x	TCTGGAACACGTCCCCTCGG	224	278	284	270	288	248	265	242324587393681	0.0363	0.193594391829829	0.846	0.982	241830129131975	-0.00153	0.0378	102548045838538
ADRBK2-1	ADRBK2	x	ACTACTTACACACTCGCATG	193	245	202	215	146	160	194	228780172993023	-0.297	-128689324882941	0.198	0.801	232905871926422	-0.00577	-0.291	0.813943185070435
ADRBK2-2	ADRBK2	x	GATGAAGCAGAGTTTATCTG	193	242	197	211	172	276	215	233243845991561	0.0604	0.264621370388335	0.791	0.976	232359582356272	-0.00451	0.0649	104275483379447
ADRBK2-3	ADRBK2	x	TATTGGACGAGGAGGATTCG	418	367	486	433	493	475	445	264836001098093	0.14	0.911367440844364	0.362	0.883	262702429583435	0.0072	0.133	110190511587661
ADRBK2-4	ADRBK2	x	TCTTCATAAAACTTCACCTG	326	416	379	283	349	450	367	256466606425209	-0.0511	-0.268782229217395	0.788	0.975	257248435787531	0.00389	-0.055	0.965200119978853
ADRM1-1	ADRM1	x	ACGTGCTGAAGTTCAAGGCA	281	369	279	333	270	338	312	249415459401844	0.0185	0.0993806488333827	0.921	0.992	249089445927398	0.00111	0.0174	101290579292308
ADRM1-2	ADRM1	x	CACGAACTCTCTGCGCTAGG	41	35	55	73	26	116	58	176342799356294	0.715	144953833722354	0.147	0.759	16401500409361	-0.0332	0.748	1641483217621
ADRM1-3	ADRM1	x	GCTTGAACTCACAGTCGTCA	189	118	85	219	293	189	182	226007138798507	0.839	29066314778994	0.00365	0.263	211616481230079	-0.00662	0.846	178880980356521
ADRM1-4	ADRM1	x	GTGACTCCGGATAAGCGGAA	72	74	65	71	123	100	84	192427928606188	0.479	14433241650379	0.149	0.76	184716120057803	-0.0253	0.504	139377723868747
ADSL-1	ADSL	x	AAATGTGTGAAACCTAATGT	19	21	36	12	10	33	22	134242268082221	-0.467	-0.686542964577627	0.492	0.921	140369233756113	-0.0537	-0.413	0.723467442935263
ADSL-2	ADSL	x	CAGCAACGTTCTGAACGCAT	57	19	55	26	9	34	33	151851393987789	-0.925	-151620627145363	0.129	0.742	16401500409361	-0.0454	-0.88	0.526680517977418
ADSL-3	ADSL	x	GGTATAAATTCCGGACATGG	1	1	2	5	22	11	7	0.845098040014257	3.25	255275464697603	0.0107	NA	0.1249387366083	-0.0678	3.32	951365692002177
ADSL-4	ADSL	x	TATTGAAGTACTGTCTGTGC	30	24	23	58	17	18	28	144715803134222	0.272	0.441777845627154	0.659	0.957	140936947045282	-0.0488	0.321	12074805914865
ADSS-1	ADSS	x	AATTTGAAGAGGTTACAAAA	44	40	103	52	62	51	59	177085201164214	-0.181	-0.410815532216186	0.681	0.96	179472035181684	-0.0329	-0.148	0.882091365197177
ADSS-2	ADSS	x	CAGCTTTGGACGAATAAACT	88	37	45	39	15	63	48	168124123737559	-0.539	-100443705203726	0.315	0.864	175332766665861	-0.0373	-0.502	0.688247800795349
ADSS-3	ADSS	x	TGACAGAGCTCATATTGGTA	4	16	14	23	13	34	17	123044892137827	1.04	13736629086026	0.17	0.78	105435766232259	-0.0583	1.1	205622765331213
ADSS-4	ADSS	x	TTTGGATTAATTATTCCACT	19	30	18	15	30	18	22	134242268082221	-0.0888	-0.141270110127764	0.888	0.987	134895354798116	-0.0537	-0.0351	0.940304547363275
ADSSL1-1	ADSSL1	x	ACGTCACCTATGTTCTGCGG	374	378	338	424	356	442	385	25854607295085	0.165	104424244962976	0.296	0.857	256030524322096	0.00472	0.16	112116607802851
ADSSL1-2	ADSSL1	x	ACTCATCAAAATCTGACAGG	267	336	331	451	311	308	334	252374646681156	0.196	100964629417066	0.313	0.863	249322562151043	0.00225	0.194	114551789797976
ADSSL1-3	ADSSL1	x	CCTCAAACAAGCCTGGCAAG	271	150	261	183	218	217	217	233645973384853	-0.142	-0.585864962802033	0.558	0.938	235666311993682	-0.0044	-0.138	0.906261938267334
ADSSL1-4	ADSSL1	x	TACCGAAGTCAATGTCGAGG	322	467	395	499	441	359	414	26170003411209	0.134	0.744084607936365	0.457	0.912	259623044766724	0.00597	0.128	109733193757924
ADTRP-1	ADTRP	x	AATTATTACATCTCACAGGA	198	151	252	230	258	181	212	232633586092875	0.155	0.647445928996693	0.517	0.927	230175321728308	-0.00467	0.16	111342161822869
ADTRP-2	ADTRP	x	GTGCTGAAAAGAACCAAAGG	183	159	145	113	147	203	158	219865708695442	-0.0729	-0.275253371031528	0.783	0.975	221040770649497	-0.00815	-0.0648	0.950724998181175
ADTRP-3	ADTRP	x	TCTTGGCAAATGGTGCAAGG	432	324	313	336	417	330	359	255509444857832	0.0188	0.103234699277845	0.918	0.991	255185645048912	0.0035	0.0153	101311644266238
ADTRP-4	ADTRP	x	TTGCATGATTCAGCCACACG	185	132	131	100	224	158	155	219033169817029	0.106	0.353138605878005	0.724	0.967	217415675927848	-0.00846	0.114	10762401247838
AEBP1-1	AEBP1	x	CCAGACCTTTCATGGGAACG	199	144	136	104	83	127	132	212057393120585	-0.609	-218001754006192	0.0293	0.527	22032142586949	-0.0121	-0.597	0.655651007107824
AEBP1-2	AEBP1	x	GCACCAGGCTGCGCACACGT	163	247	204	105	151	209	180	225527250510331	-0.401	-146610022550625	0.143	0.754	231104711642151	-0.00673	-0.394	0.757333157938488
AEBP1-3	AEBP1	x	GCGCCGAATGTACTCAACTG	109	68	129	35	115	104	93	196848294855394	-0.269	-0.655681305253551	0.512	0.926	200860017176192	-0.0224	-0.247	0.829894585589983
AEBP1-4	AEBP1	x	GTGTGACTCCATCCCAATGG	247	248	311	208	155	212	230	236172783601759	-0.487	-230495197252516	0.0212	0.481	242921378708543	-0.00368	-0.483	0.713507252858939
AEBP2-1	AEBP2	x	CTCCATCTACCAGTCAAAGT	101	209	210	280	244	235	213	232837960343874	0.546	208777334431757	0.0368	0.56	223888208891514	-0.00462	0.551	146003201065452
AEBP2-2	AEBP2	x	GAGGAGCCCAAGGGACCGCG	101	108	83	77	120	137	104	201703333929878	0.194	0.624381214438091	0.532	0.931	198826159672876	-0.0189	0.213	114393097320381
AEBP2-3	AEBP2	x	GCGGCGCTGCTGCTGAACGG	132	151	200	197	162	162	167	222271647114758	0.109	0.447880495330533	0.654	0.956	220682587603185	-0.00747	0.116	107848043169445
AEBP2-4	AEBP2	x	GTAGACAGCACAATTTCCAG	119	233	240	206	199	234	205	231175386105575	0.11	0.424488430428655	0.671	0.958	229520045200326	-0.00507	0.115	107922823650443
AEN-1	AEN	x	ATTGCCATGGTAGCTCACAA	316	305	285	334	325	348	319	250379068305718	0.152	0.94009467466484	0.347	0.878	248000694295715	0.00148	0.151	111110872865509
AEN-2	AEN	x	CGGGTACGGTAGTCAGCGAT	200	158	230	136	193	182	183	226245108973043	-0.202	-0.844139732069497	0.399	0.895	229225607135648	-0.00655	-0.195	0.869344560090022
AEN-3	AEN	x	TGAGCATGCCTCCAGAACCA	479	507	535	597	464	565	524	271933128698373	0.0963	0.674567635468483	0.5	0.923	270500795933334	0.01	0.0863	106902826627842
AEN-4	AEN	x	TGTGGCTATCGACTGTGAGA	111	56	89	160	102	100	103	201283722470517	0.5	148349831344995	0.138	0.751	193111871059219	-0.0192	0.519	14142135623731
AES-1	AES	x	CAAGCTCGAATGTGACAAGT	66	71	45	101	48	43	62	179239168949825	0.0772	0.180990405517018	0.856	0.983	178295013326541	-0.0318	0.109	105496855662739
AES-2	AES	x	CCTGCCCTACCTCTCCCAAG	41	37	29	141	13	44	51	170757017609794	0.888	144289432332673	0.149	0.761	155226252296555	-0.036	0.924	18506088560757
AES-3	AES	x	CGGATGATAGAGTTCAGCTC	29	106	79	92	47	54	68	183250891270624	-0.149	-0.32308169155576	0.747	0.97	185329251862953	-0.0299	-0.119	0.90187537838225
AES-4	AES	x	GTGGTGAATTTGAGTTGCTG	445	480	444	554	508	422	476	267760695272049	0.116	0.783393631110882	0.433	0.905	265928219341433	0.00836	0.108	108372596684478
AFAP1-1	AFAP1	x	AATTACCACATGTAATGGAA	165	173	177	215	194	174	183	226245108973043	0.179	0.83412455671707	0.404	0.897	223468597432153	-0.00655	0.186	113209890211067
AFAP1-2	AFAP1	x	GAGGACACTCTGAATCCACG	164	135	164	104	112	154	139	214301480025409	-0.323	-123546042961133	0.217	0.814	218845973629829	-0.0108	-0.312	0.799405830352472
AFAP1-3	AFAP1	x	GATGTTTAGAATCCAAACCC	58	56	51	59	42	37	50	169897000433602	-0.258	-0.633094919958786	0.527	0.93	174036268949424	-0.0364	-0.222	0.836246399914063
AFAP1-4	AFAP1	x	GTAATGTTACAGCCTTGGAG	276	352	297	322	381	322	325	251188336097887	0.148	0.848871372617638	0.396	0.894	248902047801937	0.00179	0.146	110803234786493
AFAP1L1-1	AFAP1L1	x	CATCCACAATCGAGTGTGAG	82	72	142	123	84	118	104	201703333929878	0.135	0.40451055985193	0.686	0.96	199417045633928	-0.0189	0.154	109809281378705
AFAP1L1-2	AFAP1L1	x	CGAGCTGCGTTTCACCCAGG	180	194	188	289	224	262	223	234830486304816	0.464	231981215785308	0.0204	0.477	22726150608494	-0.00407	0.468	137936092182706
AFAP1L1-3	AFAP1L1	x	GCAAGCTGTTCAGAGGACAT	186	215	322	295	225	221	244	238738982633873	0.0355	0.151636517297375	0.879	0.986	238201704257487	-0.00283	0.0383	102491196890794
AFAP1L1-4	AFAP1L1	x	GTATTTCCACAAGGATCACA	377	374	402	408	383	437	397	259879050676312	0.0909	0.612396610065646	0.54	0.933	258470805257504	0.00525	0.0856	106503437827721
AFAP1L2-1	AFAP1L2	x	AATTCTTACTGGATGTCTCG	406	415	331	341	374	288	359	255509444857832	-0.2	-116143809182559	0.245	0.83	258433122436753	0.0035	-0.204	0.870550563296124
AFAP1L2-2	AFAP1L2	x	GCAGGGCCTGCTACCCAATG	223	133	178	127	168	167	166	222010808804005	-0.209	-0.811745097604572	0.417	0.901	225042000230889	-0.00753	-0.201	0.865136690584988
AFAP1L2-3	AFAP1L2	x	GGAGGAGCTGTATGACGACG	189	161	150	297	247	146	198	229666519026153	0.465	177781012190544	0.0754	0.664	222184874961636	-0.0055	0.471	138031735339663
AFAP1L2-4	AFAP1L2	x	TGAAGGAAACCAGTACACCC	311	174	180	211	294	252	237	23747483460101	0.187	0.758743445868948	0.448	0.91	234570039058344	-0.00326	0.19	113839402907488
AFF1-1	AFF1	x	AATCTGTCACCGAAGCACAG	532	465	460	487	592	553	515	271180722904119	0.164	116084399713127	0.246	0.83	268633829705033	0.00971	0.154	112038921419418
AFF1-2	AFF1	x	ATGGGCCGGACATAAGCCGT	276	266	237	314	210	271	262	241830129131975	0.0293	0.145961275296105	0.884	0.987	24144162029529	-0.00171	0.031	102051684769873
AFF1-3	AFF1	x	GCCTGAGAGAGCCTTAGAGG	135	196	195	312	201	256	216	233445375115093	0.548	23248990617884	0.0201	0.476	224386448943408	-0.00445	0.552	146205744840003
AFF1-4	AFF1	x	GGAGCACAGAGCCCCCACGG	88	86	92	74	79	84	84	192427928606188	-0.167	-0.544282769502304	0.586	0.944	19477603819114	-0.0253	-0.142	0.890692900606681
AFF2-1	AFF2	x	CCTCCAGAAATAATGCACGG	367	252	298	309	216	292	289	246089784275655	-0.167	-0.809327067532514	0.418	0.901	248524808095036	-0.000123	-0.167	0.890692900606681
AFF2-2	AFF2	x	GAGCTTCATGACCCACCAAG	359	319	319	406	293	392	348	254157924394658	0.13	0.738837932107141	0.46	0.913	252157390359199	0.00296	0.127	109429370126074
AFF2-3	AFF2	x	GTACTCTAGAGAGTAAGTCA	186	208	211	231	227	103	194	228780172993023	-0.109	-0.392517922551012	0.695	0.962	230463411993281	-0.00577	-0.103	0.927230546435463
AFF2-4	AFF2	x	TTTACTGCAAAACAAGCATG	344	382	224	413	312	287	327	251454775266029	0.0912	0.422901579323537	0.672	0.958	250060235056919	0.00189	0.0893	106525586897821
AFF3-1	AFF3	x	CAGCCTCTGATCATTCCCGG	88	43	85	95	60	85	76	188081359228079	0.152	0.403049633775759	0.687	0.96	185733249643127	-0.0277	0.18	111110872865509
AFF3-2	AFF3	x	CAGCTTAGGAGACTCATCAG	113	100	105	49	96	86	92	196378782734556	-0.461	-139407085623813	0.163	0.774	202530586526477	-0.0227	-0.438	0.726482524785685
AFF3-3	AFF3	x	GAGCAATCAGTACTACAACC	132	159	181	79	155	127	139	214301480025409	-0.387	-133686248701562	0.181	0.789	219682074391443	-0.0108	-0.376	0.764718138941384
AFF3-4	AFF3	x	TCTTTCTCCAGACTAACAAG	104	138	103	68	104	65	97	198677173426624	-0.542	-170447555394588	0.0883	0.684	206069784035361	-0.021	-0.521	0.686818116714811
AFF4-1	AFF4	x	ACAATGCCGAGGAGTACACC	248	308	305	321	245	251	280	244715803134222	-0.0757	-0.394789038262033	0.693	0.962	245788189673399	-0.000638	-0.0751	0.948881609010281
AFF4-2	AFF4	x	AGGCGGGTGACACTTTATGT	156	97	61	103	117	130	111	204532297878666	0.157	0.461681944143097	0.644	0.955	201980839335355	-0.0169	0.174	11149662187277
AFF4-3	AFF4	x	TGGGAATGATCACCATAGCA	216	329	331	346	233	230	281	244870631990508	-0.115	-0.509728943405905	0.61	0.948	246538285144842	-0.00058	-0.114	0.923382310729395
AFF4-4	AFF4	x	TGTATGAATAGCCGTTAGAG	78	65	47	60	122	71	74	186923171973098	0.413	10741639056649	0.283	0.849	180163234623317	-0.0282	0.441	133145161323637
AFG3L2-1	AFG3L2	x	AGGAAAAACTCCTGTTGATG	148	147	178	110	174	116	146	216435285578444	-0.242	-0.913454461210588	0.361	0.883	219773988601815	-0.00967	-0.232	0.845572287377517
AFG3L2-2	AFG3L2	x	GAATGAGACTCACTCTAGCA	51	61	59	34	30	36	45	165321251377534	-0.774	-184380287133404	0.0652	0.643	175587485567249	-0.0387	-0.735	0.584793832025974
AFG3L2-3	AFG3L2	x	TGTCGGAGAAACCACTGCCA	125	196	160	144	179	114	153	21846914308176	-0.138	-0.5156051973111	0.606	0.947	220502382165417	-0.00869	-0.129	0.90877811644852
AFG3L2-4	AFG3L2	x	TTCCACTCACCTGAAAACCC	77	107	30	68	76	59	70	184509804001426	-0.0761	-0.176297304441352	0.86	0.984	185329251862953	-0.0293	-0.0468	0.948618559633564
AFM-1	AFM	x	AAAAAATATGTGCTATGGAG	211	160	180	156	185	198	182	226007138798507	-0.0318	-0.140877786164992	0.888	0.987	226403034413212	-0.00662	-0.0252	0.97819907123385
AFM-2	AFM	x	AGAGAATATTCACCGTGTCA	292	285	263	261	312	295	285	245484486000851	0.0473	0.269704803326908	0.787	0.975	244715803134222	-0.00035	0.0477	103332924011952
AFM-3	AFM	x	AGTCAACTGCCTTCAAACAA	204	174	134	206	200	168	181	225767857486918	0.165	0.7011105693419	0.483	0.918	223214870625617	-0.00668	0.172	112116607802851
AFM-4	AFM	x	TATAACAAGAAATCTGATGT	196	145	190	257	110	145	174	22405492482826	-0.0526	-0.178140746735462	0.859	0.984	224797326636181	-0.00707	-0.0455	0.964197102885303
AFMID-1	AFMID	x	ACAACCTTCAGACGACTCGT	80	161	206	132	87	88	126	210037054511756	-0.542	-159058964518511	0.112	0.721	217318626841227	-0.0133	-0.529	0.686818116714811
AFMID-2	AFMID	x	CTCCCAGTCGGACAACCCAT	323	454	308	385	316	343	355	255022835305509	-0.0556	-0.298763332063596	0.765	0.973	255830848346489	0.00331	-0.0589	0.962194194562309
AFMID-3	AFMID	x	GCCGTGGTAATAGTGGCTTA	153	170	295	215	133	172	190	227875360095283	-0.249	-0.891261683991108	0.373	0.887	231386722036915	-0.00607	-0.243	0.84147948228538
AFMID-4	AFMID	x	TCTGGACAAACGCAACGCTG	108	93	102	209	92	100	117	206818586174616	0.404	120920743366494	0.227	0.819	200432137378264	-0.0154	0.419	132317143990812
AFP-1	AFP	x	ACATTGACCACGTTCCAGCG	144	236	226	179	257	248	215	233243845991561	0.175	0.722374095771352	0.47	0.916	230535136944662	-0.00451	0.18	112896440480613
AFP-2	AFP	x	AGTGGCTTCTTGAACAAACT	106	128	168	122	98	147	128	210720996964787	-0.131	-0.46227473167846	0.644	0.955	212710479836481	-0.0129	-0.118	0.913198250011992
AFP-3	AFP	x	AGTTGAATGCTTCCAAACAA	177	278	202	208	219	238	220	234242268082221	0.0175	0.0791624453481203	0.937	0.993	234044411484012	-0.00424	0.0217	101220394339916
AFP-4	AFP	x	ATTGTAGGTGCATACAGGAA	242	222	300	254	238	192	241	238201704257487	-0.16	-0.772066153228008	0.44	0.907	240597210385603	-0.00301	-0.157	0.895025070927972
AFTPH-1	AFTPH	x	ACCAGATTATACTCGTCCCA	117	132	158	166	167	133	146	216435285578444	0.195	0.781814177577789	0.434	0.906	213247315450556	-0.00967	0.205	114472416059868
AFTPH-2	AFTPH	x	ATAAGCATAGTGACTAACAG	147	170	145	197	150	218	171	223299611039215	0.29	123029627345334	0.219	0.816	218752072083646	-0.00723	0.297	122264027769207
AFTPH-3	AFTPH	x	TGAGTACCAGTAACAAAAGG	104	111	113	148	200	153	138	213987908640124	0.611	241367301898751	0.0158	0.44	203875258899202	-0.011	0.622	15273174979607
AFTPH-4	AFTPH	x	TTTGTTAGAATCTCCAGACA	186	195	241	413	296	386	286	245636603312904	0.816	413363738490053	3.57e-05	0.0203	231666912997116	-0.000293	0.816	17605180271263
AGA-1	AGA	x	ATGGTTGTAATCCATAAGAC	219	164	177	173	176	153	177	224797326636181	-0.158	-0.699162870412538	0.484	0.919	227106677228654	-0.0069	-0.151	0.896266699569405
AGA-2	AGA	x	CCAGATCCCTCAAAATACTG	475	316	522	383	408	411	419	26222140229663	-0.127	-0.696975271386916	0.486	0.919	264114347136982	0.00617	-0.133	0.915733686418126
AGA-3	AGA	x	GGGCCAAGTGTTGACGACCA	428	423	353	405	490	397	416	261909333062674	0.102	0.640785818748965	0.522	0.928	260350523220214	0.00605	0.0959	107326028639345
AGA-4	AGA	x	TGGAGGGCATTAGCATCTGG	122	102	66	147	136	120	116	206445798922692	0.475	159420322169485	0.111	0.72	198527674317929	-0.0156	0.491	138991821984234
AGAP1-1	AGAP1	x	ATTGTGGGTAACTTGGCCAG	147	148	182	202	204	150	172	223552844690755	0.221	0.939541332253776	0.347	0.878	220139712432045	-0.00718	0.228	116554119813456
AGAP11-1	AGAP11	x	GCGTGGGAACTCCCACTGCG	249	234	136	251	166	152	198	229666519026153	-0.122	-0.446473468233396	0.655	0.956	231456939430046	-0.0055	-0.116	0.91891288347905
AGAP11-2	AGAP11	x	GCTGGGAGTCAATGGAATGG	36	74	42	93	101	41	64	180617997398389	0.629	142961253813449	0.153	0.764	170472233322511	-0.0312	0.66	154649267491063
AGAP11-3	AGAP11	x	GGAGTGACCCAGACAAAGGG	45	34	69	35	61	40	47	167209785793572	-0.122	-0.268020861247106	0.789	0.976	169314046067529	-0.0378	-0.0842	0.91891288347905
AGAP11-4	AGAP11	x	GTGGCACGTTTGGCCAGTGA	60	50	54	71	64	48	58	176342799356294	0.158	0.417376928312906	0.676	0.959	173772259332804	-0.0332	0.191	111573932232496
AGAP1-2	AGAP1	x	CACCTGCGCGGAACAGACGG	559	500	522	409	535	586	518	271432975974523	-0.0473	-0.306487071937798	0.759	0.972	272181061521255	0.00981	-0.0571	0.967745768893888
AGAP1-3	AGAP1	x	TTACCACTACTACAGTCGAA	581	494	550	519	625	488	543	273479982958885	0.0062	0.0432256245947677	0.966	0.996	273373211059523	0.0106	-0.0044	100430676006881
AGAP1-4	AGAP1	x	TTCGCAAGCAGTCTAAGCGC	132	147	95	158	165	174	145	216136800223497	0.41	161145072760199	0.107	0.714	209575034748082	-0.00983	0.42	132868581409651
AGAP2-1	AGAP2	x	CCGGTGACCAACATTCGGTG	118	175	209	185	160	118	161	220682587603185	-0.117	-0.424445866712207	0.671	0.958	222358246242536	-0.00789	-0.109	0.922103117912631
AGAP2-2	AGAP2	x	GATTACATCCACAGTACCCA	293	253	226	349	275	302	283	245178643552429	0.262	139804102289498	0.162	0.773	241049604561607	-0.000464	0.262	119913991379111
AGAP2-3	AGAP2	x	GCAGCTGAGTTCCCTTCGCG	233	218	319	132	260	226	231	236361197989214	-0.317	-124415061150884	0.213	0.812	240936947045282	-0.00362	-0.313	0.802737388715953
AGAP2-4	AGAP2	x	TCAACTCACTAGGGGAAGCG	126	67	120	113	113	106	108	203342375548695	0.085	0.274866618631705	0.783	0.975	201842308282679	-0.0177	0.103	106068774136822
AGAP3-1	AGAP3	x	CTGCTGTCGTCGATAACCCG	168	246	118	162	160	146	167	222271647114758	-0.185	-0.675293373014894	0.499	0.923	224879037757539	-0.00747	-0.178	0.879649075922436
AGAP3-2	AGAP3	x	CTTTAAGCTCCGGTACGGAG	164	153	137	119	93	157	137	213672056715641	-0.299	-110731804355066	0.268	0.843	217993459813744	-0.0112	-0.288	0.81281560198432
AGAP3-3	AGAP3	x	GAGCGGAGTAACACACAGCT	222	204	263	294	192	328	250	239794000867204	0.241	106834214954271	0.285	0.851	236109796718796	-0.00245	0.243	118181154693437
AGAP3-4	AGAP3	x	GGGATCCTGCTAAAGCGGAG	224	222	171	233	174	258	214	233041377334919	0.108	0.481816303207757	0.63	0.951	231316390931358	-0.00456	0.113	107773314504367
AGAP4-1	AGAP4	x	GATGGGTGTGCAGGCCGATG	9	19	14	15	14	11	14	114612803567824	-0.0704	-0.0923185235264897	0.926	NA	114612803567824	-0.0614	-0.009	0.952373907319402
AGAP4-2	AGAP4	x	GCATCTCCCGGTCACGAACG	59	31	22	40	27	58	40	160205999132796	0.158	0.302398263768521	0.762	0.973	157209676795052	-0.0413	0.199	111573932232496
AGAP4-3	AGAP4	x	GGTGTCAGCATGATTCTCCG	25	15	33	25	32	35	28	144715803134222	0.334	0.595700156898685	0.551	0.937	138620160540079	-0.0488	0.383	126050339158299
AGAP4-4	AGAP4	x	GTGGGAGGAACACTGAACTG	41	17	33	57	32	63	40	160205999132796	0.74	14703869241266	0.141	0.753	148192013760143	-0.0413	0.781	167017583885674
AGAP5-1	AGAP5	x	ATTACGAAGAACAGAAATGG	73	33	41	56	32	52	48	168124123737559	-0.0704	-0.152085267960891	0.879	0.986	169019608002851	-0.0373	-0.0331	0.952373907319402
AGAP5-2	AGAP5	x	GATGGGTGCACAGGCCGATG	45	57	59	50	65	83	60	177815125038364	0.298	0.777799473047499	0.437	0.906	172970462131219	-0.0325	0.33	122943886725458
AGAP5-3	AGAP5	x	GGTGACCGTTGAAGTTGGTG	58	114	63	32	62	71	67	182607480270083	-0.51	-121203264460557	0.225	0.819	189394660755207	-0.0302	-0.48	0.702222437868999
AGAP5-4	AGAP5	x	TGTCTGCCACTGGCCAAACA	416	463	479	316	439	530	440	264345267648619	-0.0797	-0.439561556350771	0.66	0.957	265577851522482	0.00701	-0.0867	0.946254394338287
AGAP6-1	AGAP6	x	CACCCACGCCCGTTTGCAAG	383	614	613	519	435	405	495	269460519893357	-0.245	-133632786310645	0.181	0.789	272970462131219	0.00903	-0.254	0.843815796130018
AGAP6-2	AGAP6	x	CGTGACCGGGAGATGCCTGA	63	39	43	32	70	48	49	169019608002851	0.0489	0.109075832344002	0.913	0.991	168424674751531	-0.0369	0.0858	103447587463018
AGAP6-3	AGAP6	x	GAGCATGCCATTGGAACACA	63	66	103	90	74	113	85	192941892571429	0.256	0.748040643505635	0.454	0.912	188836673017124	-0.025	0.281	119416318707459
AGAP6-4	AGAP6	x	TTATTAGCATGAGGAGAGGG	197	250	184	160	208	298	216	233445375115093	0.0779	0.313867657342397	0.754	0.971	232290810452447	-0.00445	0.0823	10554805547653
AGAP9-1	AGAP9	x	CATGGACCGCTTGCAAACGG	41	36	44	56	14	38	38	157978359661681	-0.164	-0.306119191198546	0.76	0.972	160566411559679	-0.0424	-0.122	0.892546971472977
AGAP9-2	AGAP9	x	GATGGGTGCACAGGCTGATG	59	28	59	31	54	31	44	164345267648619	-0.332	-0.688653481659914	0.491	0.921	168723160106477	-0.0392	-0.293	0.794434400096105
AGAP9-3	AGAP9	x	GGTGACTGTTGAAGTTGGTG	74	45	58	40	46	63	54	173239375982297	-0.248	-0.608902388098464	0.543	0.934	177085201164214	-0.0348	-0.213	0.842062953608416
AGAP9-4	AGAP9	x	TTTCTTCATAATGTGCACGG	28	35	19	27	34	44	31	149136169383427	0.357	0.677933825301754	0.498	0.922	143669259766405	-0.0467	0.404	128075986132977
AGBL1-1	AGBL1	x	AGAGGAACTGATGCAATATG	247	299	234	262	250	200	249	239619934709574	-0.132	-0.657310935365753	0.511	0.926	241497334797082	-0.00252	-0.129	0.912565488543452
AGBL1-2	AGBL1	x	GCCTACGTGCAGATCCGACG	144	77	41	99	152	118	105	202118929906994	0.494	12715345519626	0.204	0.806	194118003660008	-0.0186	0.513	140834422691208
AGBL1-3	AGBL1	x	GGATATTTGAGGATATTCGG	81	160	117	97	89	93	106	202530586526477	-0.36	-114854911656689	0.251	0.832	207676177192421	-0.0183	-0.342	0.7791645796605
AGBL1-4	AGBL1	x	GTAGGTATAGGGATAGTGGT	145	154	252	177	169	192	182	226007138798507	-0.0344	-0.135935218684533	0.892	0.988	226403034413212	-0.00662	-0.0278	0.976437765394531
AGBL2-1	AGBL2	x	AGATATTATTCTTACGACTG	74	67	70	80	80	64	72	185733249643127	0.0863	0.259303487826049	0.795	0.976	184716120057803	-0.0288	0.115	106164394865116
AGBL2-2	AGBL2	x	AGCCCTTCTACTGTCTCACG	237	219	139	202	244	143	197	229446622616159	-0.0146	-0.055595644671395	0.956	0.995	229739571100889	-0.00557	-0.00903	0.989931085545851
AGBL2-3	AGBL2	x	AGGCAAACGAGGAATTGTCA	682	608	510	582	535	565	580	276342799356294	-0.0978	-0.699685342341655	0.484	0.919	277815125038364	0.0118	-0.11	0.934456881134845
AGBL2-4	AGBL2	x	CAAAAAGCCTTTCATAACCC	234	165	239	181	206	228	209	232014628611105	-0.053	-0.238162050396079	0.812	0.978	23276994240015	-0.00484	-0.0482	0.963929807740643
AGBL3-1	AGBL3	x	CCATGTTCCTAGCAAGCGTG	561	513	645	425	522	486	525	272015930340596	-0.263	-180364332409962	0.0713	0.658	275815462196739	0.01	-0.273	0.833353207159218
AGBL3-2	AGBL3	x	CCTGCTAGTCTTTACAGTCG	139	240	213	199	165	137	182	226007138798507	-0.241	-0.935716573907014	0.349	0.879	229520045200326	-0.00662	-0.234	0.84615859660029
AGBL3-3	AGBL3	x	TGAGAGTGGTAATCTACAGA	309	333	265	352	335	323	320	250514997831991	0.155	0.916595499839311	0.359	0.883	248048603234043	0.00153	0.153	111342161822869
AGBL3-4	AGBL3	x	TTCCGGGTATACCATACAGA	155	174	186	173	242	129	176	224551266781415	0.079	0.306237749010803	0.759	0.972	223468597432153	-0.00696	0.086	105628562535186
AGBL4-1	AGBL4	x	AATCCTGATGGAGTCTACCT	774	670	666	614	685	636	674	282865989653532	-0.125	-101587951470566	0.31	0.862	284716120057803	0.0144	-0.139	0.917004043204671
AGBL4-2	AGBL4	x	ATGATGAGGGTGTTTCCCCT	639	706	511	810	712	533	652	281424759573192	0.147	0.896885616998534	0.37	0.886	279145671716318	0.0138	0.133	110726458448428
AGBL4-3	AGBL4	x	CAGGGCTGGTTATCGTCAGG	291	370	249	295	240	305	292	246538285144842	-0.115	-0.581747989715978	0.561	0.939	248192013760143	4.38e-05	-0.115	0.923382310729395
AGBL4-4	AGBL4	x	TTGAACCAGACTCGGAAGCG	155	104	139	201	119	147	144	215836249209525	0.231	0.829444304208668	0.407	0.898	212276181735403	-0.00999	0.241	117364817828135
AGBL5-1	AGBL5	x	ACACCATCGGGGTTCAACAT	162	189	196	142	227	151	178	225042000230889	-0.073	-0.29678069242325	0.767	0.973	226086607161377	-0.00685	-0.0662	0.950659101229818
AGBL5-2	AGBL5	x	ACATGGCGGAATGTAATCCG	153	181	148	72	184	208	158	219865708695442	-0.0549	-0.169613425713421	0.865	0.984	220592578351919	-0.00815	-0.0468	0.962661167376638
AGBL5-3	AGBL5	x	GGAAATAGCTGCTCTAGACG	82	61	83	125	62	82	82	191381385238372	0.251	0.70666374681731	0.48	0.918	187698718442774	-0.026	0.277	119003169630668
AGBL5-4	AGBL5	x	TTCTACTTCAGCGTCCGGGG	74	93	77	77	84	96	84	192427928606188	0.0749	0.238241649099922	0.812	0.978	191026857161907	-0.0253	0.1	105328802506201
AGER-1	AGER	x	CATCATAGGAGTATCTGTGA	228	374	257	248	317	288	285	245484486000851	-0.0101	-0.0475736012020918	0.962	0.996	245687190911158	-0.00035	-0.00975	0.993023661896327
AGER-2	AGER	x	GTCAGGGTTACGGTTCCACC	272	332	350	366	338	284	324	251054501020661	0.0505	0.281491901108758	0.778	0.974	250242711998443	0.00174	0.0488	103562378150463
AGER-3	AGER	x	GTGCTCAAAACATCACAGCC	682	544	692	631	593	631	629	279865064544527	-0.0482	-0.362393342097294	0.717	0.966	280572734811498	0.0132	-0.0614	0.96714224593598
AGER-4	AGER	x	TGGAATTCTTACGGTAGACA	193	210	216	155	182	231	198	229666519026153	-0.124	-0.558271148988964	0.577	0.941	231456939430046	-0.0055	-0.118	0.917639882311365
AGFG1-1	AGFG1	x	ACCACAGGTAAAGCTCCTGT	189	202	239	199	200	231	210	232221929473392	1.64e-07	7.9634e+07	1	1	232221929473392	-0.00478	0.00478	100000011367614
AGFG1-2	AGFG1	x	CAGTTGTAGGTCGTTCTCAA	182	219	147	80	170	211	168	222530928172586	-0.249	-0.803152560924432	0.422	0.902	226165930376471	-0.00741	-0.242	0.84147948228538
AGFG1-3	AGFG1	x	GCCGACCGTCATGTTAACGT	426	296	308	332	283	246	315	24983105537896	-0.259	-131146131521323	0.19	0.796	253571596998551	0.00127	-0.26	0.835666958921853
AGFG1-4	AGFG1	x	GGTTCCAAAATCAGCACTGG	90	145	147	110	127	128	124	209342168516224	-0.0657	-0.232934360180417	0.816	0.979	210494210819205	-0.0138	-0.0519	0.955481602539652
AGFG2-1	AGFG2	x	ACTGACCTGCTGGCTGACAT	319	218	225	124	196	200	214	233041377334919	-0.551	-225007882079994	0.0244	0.5	240483371661994	-0.00456	-0.546	0.682546858942583
AGFG2-2	AGFG2	x	CCGACGGCACCACACCTCCG	680	672	747	584	591	588	644	280888586735981	-0.252	-211698705045621	0.0343	0.548	284489118386274	0.0136	-0.266	0.83973149294414
AGFG2-3	AGFG2	x	CCGAGCGTGAGACTGACTGA	853	791	766	743	864	821	806	290633504180509	0.0107	0.094524538943756	0.925	0.992	290489578785521	0.0175	-0.0068	100744424648595
AGFG2-4	AGFG2	x	GATTGACTTGACACGATGAG	586	538	542	456	538	636	549	273957234445009	-0.0315	-0.214282155845721	0.83	0.98	274455374235111	0.0108	-0.0423	0.978402503162833
AGGF1-1	AGGF1	x	ACAATAGTAATAAATTCCAG	94	100	108	90	120	55	94	19731278535997	-0.189	-0.561480921769589	0.574	0.941	200288568823749	-0.022	-0.167	0.877213548732822
AGGF1-2	AGGF1	x	GGAGACTGATAGTGAACCAG	19	39	75	34	67	51	48	168124123737559	0.193	0.372061259870608	0.71	0.964	164673038624742	-0.0373	0.23	114313833541404
AGGF1-3	AGGF1	x	TAAATACCTGAGATTGACCA	193	181	133	149	211	143	168	222530928172586	-0.0114	-0.0449939104684146	0.964	0.996	222788670461367	-0.00741	-0.00399	0.992129259908872
AGGF1-4	AGGF1	x	TTTCTGTTCTATCGGTACCA	150	152	189	167	78	105	140	214612803567824	-0.488	-164272799760723	0.1	0.704	221396023740331	-0.0106	-0.477	0.71301285868207
AGK-1	AGK	x	CAAAGAAGGCCTTTGTACAG	84	52	97	142	36	77	81	190848501887865	0.13	0.294861718947532	0.768	0.973	189023466630636	-0.0263	0.156	109429370126074
AGK-2	AGK	x	GCAATGACCGGCCTTCGATG	115	127	116	131	117	182	131	211727129565576	0.264	0.984048559945443	0.325	0.868	207676177192421	-0.0123	0.276	120080342748521
AGK-3	AGK	x	GCCAGATAAATGTAAAATCG	138	167	182	151	130	126	149	217318626841227	-0.259	-106442745661418	0.287	0.852	221040770649497	-0.00923	-0.25	0.835666958921853
AGK-4	AGK	x	TGTTCTTCGACGAACAGATG	84	116	161	91	104	77	106	202530586526477	-0.408	-128619890643415	0.198	0.801	2080385947186	-0.0183	-0.39	0.753667454779191
AGL-1	AGL	x	AAACACGAAACCTTATAGGA	132	160	194	224	151	176	173	22380461031288	0.181	0.729165955298189	0.466	0.915	220951501454263	-0.00712	0.188	113366941277842
AGL-2	AGL	x	ACGCTATGGGAATAAACCAG	203	320	337	249	280	349	290	246239799789896	0.0299	0.136438694198482	0.891	0.988	245737719652391	-6.75e-05	0.03	102094135699225
AGL-3	AGL	x	ATGCGTAATATCCATAAACA	141	146	163	142	152	196	157	219589965240923	0.123	0.510438183724017	0.61	0.948	217609125905568	-0.00825	0.131	108899701533611
AGL-4	AGL	x	TGAAGAGTAACACAGTCCAA	240	173	253	291	291	307	259	241329976408125	0.417	209831542904631	0.0359	0.555	234635297445064	-0.0019	0.419	133514830329591
AGMAT-1	AGMAT	x	GACAGTCAATCCTAGCACGG	119	130	202	189	174	168	164	22148438480477	0.236	0.916747411065984	0.359	0.883	21770552871583	-0.00767	0.244	117772278959498
AGMAT-2	AGMAT	x	GCACACGGACACGACCGACA	332	372	337	370	357	365	356	255144999797288	0.069	0.446471699559796	0.655	0.956	254032947479087	0.00336	0.0656	104898932757495
AGMAT-3	AGMAT	x	TCTCCTGGACTGTAAGCGTG	5	14	5	1	1	8	6	0.778151250383644	-1.26	-0.971466849026663	0.331	NA	0.903089986991944	-0.068	-1.19	0.417543959714185
AGMAT-4	AGMAT	x	TTGCAGACTGACATTACCCA	300	273	283	314	268	230	278	244404479591808	-0.0761	-0.409263168024442	0.682	0.96	245535250995749	-0.000754	-0.0753	0.948618559633564
AGMO-1	AGMO	x	AGATGAACAGCATATACTGA	272	84	224	206	213	208	201	230319605742049	0.112	0.358364658132364	0.72	0.966	228630673884327	-0.00531	0.117	108072540203935
AGMO-2	AGMO	x	CTTATTGAAGAATCCAGGTG	109	126	140	40	116	94	104	201703333929878	-0.585	-163041187553093	0.103	0.709	209691001300806	-0.0189	-0.566	0.666649338545599
AGMO-3	AGMO	x	GCTTACCATGAGCCATACGA	95	141	133	98	130	129	121	208278537031645	-0.0477	-0.169785778748548	0.865	0.984	20899051114394	-0.0144	-0.0333	0.967477489986477
AGMO-4	AGMO	x	GTTTGGAATGAAGTTTCACT	144	185	177	114	234	144	166	222010808804005	-0.0405	-0.144786833253596	0.885	0.987	222702926212014	-0.00753	-0.033	0.972317909302685
AGO1-1	AGO1	x	AAGAGAACTGTACCATACAC	232	212	291	113	200	227	212	232633586092875	-0.445	-17228815194391	0.0849	0.679	238916608436453	-0.00467	-0.44	0.734584316639154
AGO1-2	AGO1	x	CAGCATTCGCCAGCTCACAA	437	262	417	371	408	287	364	256110138364906	-0.0661	-0.318883808146036	0.75	0.97	25705429398819	0.00374	-0.0698	0.955216723509828
AGO1-3	AGO1	x	GAACGCGCTGAGAGTCCGTG	160	130	203	240	251	251	206	231386722036915	0.59	266714073406995	0.00765	0.345	221572566455757	-0.00501	0.595	150524674741107
AGO1-4	AGO1	x	GATGCGGGGATGCCTATCCA	119	113	83	100	99	66	97	198677173426624	-0.249	-0.792196163619323	0.428	0.904	202118929906994	-0.021	-0.228	0.84147948228538
AGO2-1	AGO2	x	AAGGTGGAGATAACGCACTG	371	409	308	292	323	300	334	252374646681156	-0.25	-145596556454308	0.145	0.758	25595076406425	0.00225	-0.252	0.840896415253715
AGO2-2	AGO2	x	CCTGTCCGACTTGTAAACAT	357	295	366	187	212	222	273	243616264704076	-0.713	-384114201204554	0.000122	0.0481	253062652328108	-0.00105	-0.712	0.610050255136112
AGO2-3	AGO2	x	CGGAACAAGCAGTTCCACAC	457	485	338	486	333	361	410	261278385671974	-0.117	-0.624944593534352	0.532	0.93	263008871492821	0.0058	-0.123	0.922103117912631
AGO2-4	AGO2	x	TAACGCCTGCAAGCTCACGC	315	277	206	215	200	344	260	241497334797082	-0.0723	-0.301956004326219	0.763	0.973	242488163663107	-0.00184	-0.0705	0.951120475823925
AGO3-1	AGO3	x	ATGTCGTAGCACCACATCAA	264	181	204	162	148	197	193	228555730900777	-0.356	-153496190030158	0.125	0.735	233512344208071	-0.00584	-0.35	0.781327880172317
AGO3-2	AGO3	x	GGATGACGATAATAAGCTGT	67	130	70	101	105	58	88	194448267215017	-0.0163	-0.0440572314927835	0.965	0.996	194939000664491	-0.024	0.0077	0.988765287040678
AGO3-3	AGO3	x	GTGTTTGTAATGTAACAAGG	487	315	241	335	268	205	308	248855071650044	-0.368	-149486328413381	0.135	0.747	254116305370687	0.000901	-0.369	0.774855930959171
AGO3-4	AGO3	x	TGTGAAGGCATTACTTCTAG	78	148	81	39	102	61	85	192941892571429	-0.604	-150238567320026	0.133	0.745	201001712075752	-0.025	-0.579	0.657927262514504
AGO4-1	AGO4	x	AAAGTTGAGGTGACCCACTG	330	362	315	238	295	262	300	247712125471966	-0.341	-195110630032761	0.051	0.607	252590821583396	0.000479	-0.341	0.789493886700555
AGO4-2	AGO4	x	CCTTACCTGTTGACTCTACG	324	238	232	261	257	267	263	241995574848976	-0.0164	-0.0841172939184782	0.933	0.993	242269924770743	-0.00165	-0.0148	0.988696753428805
AGO4-3	AGO4	x	GAAAAAGGAACGGCCCACTG	162	217	100	202	160	186	171	223299611039215	0.194	0.699792837118452	0.484	0.919	22032142586949	-0.00723	0.201	114393097320381
AGO4-4	AGO4	x	GGATAACCACTATTAGCTGT	133	81	187	137	187	146	145	216136800223497	0.229	0.7552300451489	0.45	0.91	212602311790052	-0.00983	0.239	117202228367451
AGPAT1-1	AGPAT1	x	CCTGTACGGGATCCGAGTGG	103	83	115	127	120	135	114	205690485133647	0.344	125485736703056	0.21	0.809	200144524087418	-0.0161	0.36	12692708860198
AGPAT1-2	AGPAT1	x	GAGGGAACGAGAAACCACAA	168	142	220	223	142	103	166	222010808804005	-0.179	-0.612085907838793	0.54	0.933	224715461488113	-0.00753	-0.171	0.883315051481465
AGPAT1-3	AGPAT1	x	GTCCTCGCACGGCACACACA	138	137	150	182	117	189	152	218184358794477	0.199	0.774280260052406	0.439	0.907	215126767533065	-0.00882	0.208	1147902413855
AGPAT1-4	AGPAT1	x	TGGTTGGAGACAACAACATA	116	185	89	125	166	140	137	213672056715641	0.144	0.482875593222204	0.629	0.951	211394335230684	-0.0112	0.155	110496448479991
AGPAT2-1	AGPAT2	x	ATGACAGTGATGGCCGACCT	122	115	190	144	180	135	148	217026171539496	0.104	0.382721776427491	0.702	0.963	215330662030536	-0.00938	0.113	10747491728555
AGPAT2-2	AGPAT2	x	CAAAGTGTGGATCTATCCCG	32	19	15	60	24	9	26	141497334797082	0.495	0.716072063235979	0.474	0.917	134242268082221	-0.0504	0.545	140932075514202
AGPAT2-3	AGPAT2	x	GCTGCGTGCAGATCGCCAAG	82	105	81	79	129	72	91	195904139232109	0.0632	0.189516844888871	0.85	0.982	195101353930913	-0.023	0.0862	104478059016941
AGPAT2-4	AGPAT2	x	TGGCGTAGAACTCGGCCGCG	62	37	61	58	46	59	54	173239375982297	0.0268	0.0662820469474535	0.947	0.994	172699872793626	-0.0348	0.0616	101874995809481
AGPAT3-1	AGPAT3	x	CAAGCACCGCGTTAGCATGG	208	242	248	278	216	176	228	235793484700045	-0.0591	-0.270399277341339	0.787	0.975	23667341679035	-0.00379	-0.0553	0.959862726118777
AGPAT3-2	AGPAT3	x	CACTCACCCACATGTACTCG	241	220	185	341	270	362	270	243136376415899	0.591	30043257497974	0.00266	0.234	233311126327542	-0.00123	0.592	150629046663381
AGPAT3-3	AGPAT3	x	CTTCCCAAAGCGCTCTACCG	92	77	139	81	98	128	102	200860017176192	-0.00469	-0.0143905446491775	0.989	0.998	201142946178078	-0.0195	0.0148	0.996754418048195
AGPAT3-4	AGPAT3	x	TACCACGTCCAGCCGATGAG	402	351	293	429	504	338	386	258658730467176	0.281	151699597932476	0.129	0.741	254241042981159	0.00477	0.276	121503679190502
AGPAT4-1	AGPAT4	x	ACAGCCCAAAGCGTTCGGAC	341	356	382	381	358	290	351	254530711646582	-0.0685	-0.407852925099397	0.683	0.96	255590018996325	0.00311	-0.0716	0.953628990646118
AGPAT4-2	AGPAT4	x	CCATACTTGAGGTAGGCGCG	302	332	219	404	339	394	332	252113808370404	0.415	220107776090422	0.0277	0.521	245382777644786	0.00215	0.413	13332986770912
AGPAT4-3	AGPAT4	x	GATGTGGTACTTCACCGAGA	386	375	384	444	369	439	400	260205999132796	0.129	0.850304327277765	0.395	0.894	258168423195624	0.00538	0.124	109353545748463
AGPAT4-4	AGPAT4	x	TACATACAAAATACTTCTCG	140	119	105	149	152	180	141	214921911265538	0.402	160584252611	0.108	0.715	208398012892939	-0.0105	0.413	132133840565827
AGPAT5-1	AGPAT5	x	AAAATCACAAGATACATCTG	300	329	418	440	313	372	362	255870857053317	0.104	0.557433433650726	0.577	0.942	254282542695918	0.00365	0.1	10747491728555
AGPAT5-2	AGPAT5	x	CTTCTTCGAGAATTACACCG	195	219	169	219	205	191	200	230102999566398	0.0771	0.366054188586121	0.714	0.966	228854730003935	-0.00537	0.0825	105489543431359
AGPAT5-3	AGPAT5	x	GACCCCCCAGGCCAACACGT	381	290	285	296	363	293	318	250242711998443	-0.00605	-0.0326153623448919	0.974	0.997	250333663755644	0.00142	-0.00747	0.995815240170094
AGPAT5-4	AGPAT5	x	GCAAAGTAACACCCATACAA	297	264	284	219	303	282	275	243933269383026	-0.0718	-0.37838107368903	0.705	0.963	244973545423003	-0.000931	-0.0709	0.951450166189707
AGPAT6-1	AGPAT6	x	AGCGCTCAAACCAGACGTGT	108	187	103	94	206	92	132	212057393120585	-0.0219	-0.0624410209118892	0.95	0.994	212276181735403	-0.0121	-0.0098	0.984934711001328
AGPAT6-2	AGPAT6	x	CTTTACAAGCCCTACACCAA	250	208	299	267	285	268	263	241995574848976	0.115	0.593676259419411	0.553	0.937	240197462478041	-0.00165	0.117	108297504552592
AGPAT6-3	AGPAT6	x	GATGATCACATCGATCGGTG	174	127	171	135	203	209	170	223044892137827	0.213	0.839043224034458	0.401	0.896	219682074391443	-0.00729	0.22	115909595190446
AGPAT6-4	AGPAT6	x	GTAGAGTTTGCGGATACCAA	201	226	216	177	252	201	212	232633586092875	-0.0295	-0.13867802252011	0.89	0.987	233108971820456	-0.00467	-0.0248	0.97975979762333
AGPAT9-1	AGPAT9	x	GATAATGAATGGTACCAGAG	147	102	139	156	113	196	142	215228834438306	0.261	0.933728534024813	0.35	0.88	211171047087454	-0.0103	0.271	119830902133942
AGPAT9-2	AGPAT9	x	GCTGGTTATAGGAACTACAC	238	274	257	301	353	352	296	247129171105894	0.388	222738162264871	0.0259	0.51	240880508508177	0.000263	0.388	130857807145501
AGPAT9-3	AGPAT9	x	GTCTGCGGCTCACTATGGTG	684	747	909	710	663	757	745	287215627274829	-0.136	-103428572935971	0.301	0.858	289209460269048	0.0161	-0.152	0.910038824080899
AGPAT9-4	AGPAT9	x	TCAAGATTAAAACATCAATG	406	307	265	418	421	491	385	25854607295085	0.444	245550498497068	0.0141	0.426	251321760006794	0.00472	0.439	136037085240596
AGPS-1	AGPS	x	CAATTTGACAGCTCATGTAG	83	72	121	78	68	90	85	192941892571429	-0.226	-0.677887228333374	0.498	0.922	196378782734556	-0.025	-0.201	0.855002177891973
AGPS-2	AGPS	x	GAATATCTATGGCAATATCG	86	69	93	47	75	23	66	181954393554187	-0.774	-180787933555877	0.0706	0.656	191733042610655	-0.0305	-0.744	0.584793832025974
AGPS-3	AGPS	x	GTACCAATGAGTGCAAAGCG	105	176	155	130	144	71	130	211394335230684	-0.338	-107129556175432	0.284	0.85	216236523454892	-0.0125	-0.326	0.79113730118545
AGPS-4	AGPS	x	TGCCACTAAGAGGGTACCTA	93	104	44	63	66	74	74	186923171973098	-0.248	-0.648265309793212	0.517	0.927	190489578785521	-0.0282	-0.22	0.842062953608416
AGR2-1	AGR2	x	AAGTGATGAATAATCATCAA	317	374	473	398	363	352	380	257978359661681	-0.0646	-0.367188830352284	0.713	0.965	258883172559421	0.00449	-0.0691	0.956210398660747
AGR2-2	AGR2	x	AGAGATACCACAGTCAAACC	166	216	164	164	166	164	173	22380461031288	-0.144	-0.638908710577392	0.523	0.929	226007138798507	-0.00712	-0.137	0.905006462882905
AGR2-3	AGR2	x	ATAAATTACCTTGACTGTGT	340	351	407	470	409	302	380	257978359661681	0.105	0.573776612565782	0.566	0.939	256348108539441	0.00449	0.101	107549439045738
AGR2-4	AGR2	x	GGAAACTTACAACCAGATTG	396	328	366	308	303	341	340	253147891704225	-0.195	-119275728166547	0.233	0.823	256030524322096	0.00256	-0.198	0.873572895916694
AGR3-1	AGR3	x	AAGAAACTGTGACGAGTAAG	301	303	367	306	270	262	302	248000694295715	-0.213	-120372699980749	0.229	0.821	251009797518834	0.000585	-0.214	0.862741344542656
AGR3-2	AGR3	x	AGGTGATAAATTCTTATCAG	178	144	166	121	124	137	145	216136800223497	-0.353	-14692153734119	0.142	0.753	221129856728305	-0.00983	-0.343	0.782954296256543
AGR3-3	AGR3	x	GAGGATTGTCAATACTCTCA	311	251	304	189	319	285	276	244090908206522	-0.127	-0.592026999114258	0.554	0.937	246039663729768	-0.000872	-0.126	0.915733686418126
AGR3-4	AGR3	x	GCACCTCTTGAGAGTGTCTG	170	97	101	100	86	129	114	205690485133647	-0.224	-0.714376128610664	0.475	0.917	208872656395386	-0.0161	-0.208	0.856188284546457
AGRN-1	AGRN	x	ACAGCGAGGGCTCTACGTAG	389	288	319	301	256	356	318	250242711998443	-0.126	-0.661280671518144	0.508	0.925	252113808370404	0.00142	-0.127	0.916368644675351
AGRN-2	AGRN	x	AGCAGCGATGAGGAACTGAG	551	533	574	402	558	545	527	272181061521255	-0.14	-0.923939633691576	0.356	0.882	274246327149459	0.0101	-0.15	0.907519155317161
AGRN-3	AGRN	x	GTGGCCCCCGTGATAAACGC	259	135	156	217	170	260	200	230102999566398	0.234	0.873564716514161	0.382	0.89	226324143477458	-0.00537	0.239	117609125029096
AGRN-4	AGRN	x	GTGGCGCGCAAAGGACCCTG	186	162	130	117	110	138	140	214612803567824	-0.389	-151497791187944	0.13	0.742	220230664189246	-0.0106	-0.378	0.76365874898035
AGRP-1	AGRP	x	ACGCAGCGACGTGAGGAGCG	204	188	200	208	219	141	193	228555730900777	-0.0597	-0.260030788226638	0.795	0.976	229520045200326	-0.00584	-0.0539	0.959463613432279
AGRP-2	AGRP	x	AGAAGAGGATCTGTTGCAGG	241	190	198	246	339	287	250	239794000867204	0.471	232279152665791	0.0202	0.476	232152939072561	-0.00245	0.473	138606988565041
AGRP-3	AGRP	x	CCTGCAGGTACTAGACCTGC	1	3	5	3	1	2	2	0.301029995663981	-0.585	-0.340029416433736	0.734	NA	0.477121254719662	-0.0515	-0.534	0.666649338545599
AGRP-4	AGRP	x	GCCACGCGAGGAGCCCAGAT	355	300	293	197	305	354	301	247856649559384	-0.147	-0.68578610837546	0.493	0.921	24996870826184	0.000532	-0.148	0.903126510151822
AGT-1	AGT	x	AGAGCGTGGGAGGACCACAG	116	74	123	87	112	101	102	200860017176192	-0.0612	-0.198937115428965	0.842	0.982	201842308282679	-0.0195	-0.0417	0.958466557604175
AGT-2	AGT	x	CTTACCTTGGAAGTGGACGT	228	235	265	346	273	345	282	245024910831936	0.405	219736967610854	0.028	0.522	238501012459337	-0.000522	0.406	13240889103954
AGT-3	AGT	x	TGTCCTTCCAAGGAACACCC	268	195	150	191	242	217	210	232221929473392	0.0846	0.352337553843069	0.725	0.967	231033921979875	-0.00478	0.0894	106039369704635
AGT-4	AGT	x	TTGACACCGAAGACAAGTTG	425	397	383	416	305	374	383	258319877396862	-0.138	-0.838363406171751	0.402	0.896	260386579219122	0.00463	-0.143	0.90877811644852
AGTPBP1-1	AGTPBP1	x	AGTAAAGGCTAGAATTAATG	200	275	247	179	140	283	221	234439227368511	-0.262	-102079747051337	0.307	0.861	238141594284998	-0.00418	-0.258	0.833931043824964
AGTPBP1-2	AGTPBP1	x	GACCATGGTGGATTCGTATG	181	194	217	162	177	241	195	229003461136252	-0.0295	-0.129792832995286	0.897	0.988	229520045200326	-0.0057	-0.0238	0.97975979762333
AGTPBP1-3	AGTPBP1	x	GAGTGATATCATAGATCGTG	342	260	258	292	306	263	287	245788189673399	0.00168	0.00895512284571384	0.993	0.998	245737719652391	-0.000236	0.00192	100116516554189
AGTPBP1-4	AGTPBP1	x	TTCATCGGTAGAACAAGCAT	341	514	472	457	637	542	494	269372694892365	0.302	171442827066361	0.0865	0.681	264574966814477	0.009	0.293	123285232546381
AGTR1-1	AGTR1	x	CAAGCATTGTGCGTCGAAGG	101	79	146	210	140	143	136	213353890837022	0.597	201425155806751	0.044	0.586	203609634534828	-0.0114	0.608	151256799728396
AGTR1-2	AGTR1	x	GCTGTGTAGACAGCCCATAG	96	69	133	221	154	152	138	213987908640124	0.822	277902366364607	0.00545	0.307	199709500935659	-0.011	0.833	176785506212734
AGTR1-3	AGTR1	x	GTAGAAACACACTAGCGTAC	145	135	78	117	154	152	130	211394335230684	0.241	0.82081196116233	0.412	0.899	207676177192421	-0.0125	0.254	118181154693437
AGTR1-4	AGTR1	x	TCAGGCCCAGCCCTATCGGG	282	257	216	212	278	158	234	236921585741014	-0.22	-0.953910463599497	0.34	0.874	240082569690953	-0.00345	-0.217	0.858565436437754
AGTR2-1	AGTR2	x	ACAGGCCATACACCAAACAA	555	490	670	579	659	691	607	278318869107526	0.17	117288584343676	0.241	0.827	275714286965913	0.0125	0.158	112505848468881
AGTR2-2	AGTR2	x	ATTGGGCATATTTCTCAGGT	441	268	330	315	359	320	339	253019969820308	-0.0639	-0.328220635537829	0.743	0.969	253949429283752	0.00251	-0.0664	0.956674467414722
AGTR2-3	AGTR2	x	GGAGTAAATCAGCCACAGCG	313	378	443	418	423	518	416	261909333062674	0.261	15311067463135	0.126	0.737	257749179983723	0.00605	0.255	119830902133942
AGTR2-4	AGTR2	x	GTACCTATCAACACTCATGC	541	433	583	473	463	452	491	269108149212297	-0.166	-111322682554687	0.266	0.841	271516735784846	0.00889	-0.175	0.891310495896971
AGTRAP-1	AGTRAP	x	CTCCATCGACGCCATAAGCA	170	205	237	176	254	272	219	234044411484012	0.198	0.862371580777927	0.388	0.892	23096301674259	-0.00429	0.202	114710702422617
AGTRAP-2	AGTRAP	x	GCCTGCTGTGAACCTGAAGG	230	171	187	194	156	223	194	228780172993023	-0.0373	-0.162566324429329	0.871	0.985	229225607135648	-0.00577	-0.0315	0.974476973031607
AGTRAP-3	AGTRAP	x	GTGTCCGTGAGGCTGACCCG	116	135	157	112	66	73	110	204139268515822	-0.701	-230057806957433	0.0214	0.483	213353890837022	-0.0171	-0.684	0.615145672375572
AGTRAP-4	AGTRAP	x	TGGCCATGCCCACGCCAAAG	189	160	171	124	243	231	186	226951294421792	0.202	0.765650820502261	0.444	0.909	223888208891514	-0.00636	0.208	115029189335061
AGXT-1	AGXT	x	CCCCTTTACATGGACCGGCA	187	245	240	182	198	177	205	231175386105575	-0.271	-128545439233619	0.199	0.801	235024801833416	-0.00507	-0.266	0.828744904487992
AGXT-2	AGXT	x	CCGATGACCAAGGACCCTGG	203	170	87	133	122	166	147	216731733474818	-0.128	-0.417863798806007	0.676	0.959	218563657696191	-0.00952	-0.118	0.915099168127928
AGXT2-1	AGXT2	x	AACACTGACAGTAACAATCC	234	262	242	220	229	255	240	238021124171161	-0.068	-0.362152986968227	0.717	0.966	239093510710338	-0.00308	-0.0649	0.953959550547558
AGXT2-2	AGXT2	x	ACACTTGGCTTGACAAACGT	109	164	118	106	90	98	114	205690485133647	-0.411	-144750718917527	0.148	0.76	21150555026762	-0.0161	-0.395	0.752101875694344
AGXT2-3	AGXT2	x	CAGGAGAAAGATGTTCCTTG	202	160	188	109	128	216	167	222271647114758	-0.28	-10144231137903	0.31	0.862	226324143477458	-0.00747	-0.273	0.823591017267573
AGXT2-4	AGXT2	x	GCACTGGAGAATCTCGACAG	174	177	237	145	200	99	172	223552844690755	-0.405	-1474856403602	0.14	0.752	229225607135648	-0.00718	-0.398	0.755236292781413
AGXT-3	AGXT	x	GCTGCTGTTCTTAACCCACG	93	67	99	123	129	179	115	206069784035361	0.735	249873693835809	0.0125	0.411	193617850936159	-0.0158	0.751	166439746942305
AGXT-4	AGXT	x	GTCACTGAAGGAGATGAGCG	154	136	195	183	121	174	160	220411998265593	-0.021	-0.0815768087106272	0.935	0.993	22086204838826	-0.00797	-0.013	0.985549336939371
AHCTF1-1	AHCTF1	x	CCACCCAAAATGGATTCCTG	270	278	230	298	208	217	250	239794000867204	-0.106	-0.513054708090763	0.608	0.947	241385834227003	-0.00245	-0.104	0.929160674250913
AHCTF1-2	AHCTF1	x	CCTACATGCAGACTAGCAGG	108	157	169	144	133	140	142	215228834438306	-0.0576	-0.222369101427368	0.824	0.98	216036847479285	-0.0103	-0.0473	0.960861234327189
AHCTF1-3	AHCTF1	x	GAATTCATGATTCTGAACGC	96	61	95	72	78	107	85	192941892571429	0.0283	0.0839641548793643	0.933	0.993	192427928606188	-0.025	0.0533	10198097244216
AHCTF1-4	AHCTF1	x	GTTAATCCTTCGTCCAACAC	59	91	108	122	45	76	84	192427928606188	-0.0864	-0.218019578285475	0.827	0.98	193449845124357	-0.0253	-0.0611	0.941870095858957
AHCY-1	AHCY	x	AACATGATTCTGGACGACGG	38	22	30	53	40	27	35	154406804435028	0.415	0.817168613444686	0.414	0.9	147712125471966	-0.0441	0.459	13332986770912
AHCY-2	AHCY	x	CTCTGAGGAGACCACGACTG	28	44	83	39	53	88	56	17481880270062	0.216	0.450650883803327	0.652	0.956	171321044345063	-0.034	0.25	116150873192572
AHCY-3	AHCY	x	GATGATGTCAATACAGCCTG	7	10	6	15	4	25	11	104139268515822	0.936	101634808838184	0.309	NA	0.88460658129793	-0.0645	1	191321631618375
AHCY-4	AHCY	x	GCGGGCTCCGAAACCCCGCA	200	171	201	154	179	171	179	225285303097989	-0.183	-0.84048286170118	0.401	0.896	228027477407336	-0.00679	-0.176	0.880869374126979
AHCYL1-1	AHCYL1	x	ACTCAGGAAACGTGCTCAGG	54	128	165	92	162	91	115	206069784035361	-0.00834	-0.0220041170238073	0.982	0.998	206320822007121	-0.0158	0.00746	0.994235829461852
AHCYL1-2	AHCYL1	x	AGATGTTACAAGCAGACCAG	264	205	250	164	231	140	209	232014628611105	-0.426	-18167403946046	0.0693	0.653	237960763566322	-0.00484	-0.421	0.74432262758327
AHCYL1-3	AHCYL1	x	GATGTTTGGTGGGAAACAAG	88	82	58	138	88	100	92	196378782734556	0.516	158367022005568	0.113	0.723	188081359228079	-0.0227	0.539	142998498636169
AHCYL1-4	AHCYL1	x	TGGGGGAGACTTAACCCACT	83	57	30	64	69	52	59	177085201164214	0.122	0.285014877030341	0.776	0.974	175332766665861	-0.0329	0.155	10882424416708
AHCYL2-1	AHCYL2	x	AGTACCTTCTTGACTGTGCG	256	284	160	351	167	257	246	239093510710338	0.147	0.543085323206147	0.587	0.944	236797678529459	-0.0027	0.15	110726458448428
AHCYL2-2	AHCYL2	x	CGATAGATGTGTGAATGTGG	385	425	436	305	375	285	368	256584781867352	-0.369	-222197374844955	0.0263	0.512	261839678760349	0.00393	-0.373	0.77431902785322
AHCYL2-3	AHCYL2	x	GGAAAGCAAGTGGTAGTCTG	220	256	252	293	363	354	290	246239799789896	0.472	262400632940715	0.00869	0.364	238501012459337	-6.75e-05	0.472	138703096913139
AHCYL2-4	AHCYL2	x	TGATGATGAGACATCGCCCA	441	436	505	539	619	474	502	270070371714502	0.24	161800025678929	0.106	0.712	266338678831852	0.00927	0.231	118099266142953
AHDC1-1	AHDC1	x	CAGAGGTAAAAAAACGACGG	68	63	84	124	64	46	75	18750612633917	0.122	0.304962895745011	0.76	0.972	185531720519594	-0.028	0.15	10882424416708
AHDC1-2	AHDC1	x	GTCACCCCAAGTACGCCTTG	372	501	418	453	451	396	432	263548374681491	0.01	0.063143060214548	0.95	0.994	263380498754676	0.0067	0.0033	100695555005672
AHDC1-3	AHDC1	x	TCCGCCGCCCCAGCGATACG	173	183	139	177	139	104	152	218184358794477	-0.237	-0.895797086309114	0.37	0.886	221748394421391	-0.00882	-0.228	0.848507901705896
AHDC1-4	AHDC1	x	TTGGGGCACCCACGCAAACG	108	159	140	149	107	128	132	212057393120585	-0.0839	-0.310355366875667	0.756	0.972	213247315450556	-0.0121	-0.0718	0.943503647318165
AHI1-1	AHI1	x	AATTGGATATCCATCCCGGC	65	73	115	87	68	79	81	190848501887865	-0.113	-0.32676482124764	0.744	0.969	192599926645616	-0.0263	-0.0867	0.9246632781137
AHI1-2	AHI1	x	AGGTCTTGTGTAGTCAACTG	356	359	285	365	443	453	377	257634135020579	0.335	199252959687015	0.0463	0.593	252287874528034	0.00435	0.331	126137740883125
AHI1-3	AHI1	x	CATGTGGTTGATGAGCATAC	336	329	388	445	453	402	392	259328606702046	0.304	197652195786221	0.0481	0.6	254530711646582	0.00503	0.299	123456260689354
AHI1-4	AHI1	x	CCTGAAGAGCCATCATAGAG	200	165	108	109	113	161	143	215533603746506	-0.304	-105071443597356	0.293	0.855	219773988601815	-0.0101	-0.294	0.810003473632046
AHNAK-1	AHNAK	x	GGACCTTTGACATCAACTTG	189	235	300	254	257	351	264	242160392686983	0.252	114768669000217	0.251	0.832	238261731147748	-0.00159	0.254	119085684936497
AHNAK-2	AHNAK	x	GGTCCTAAGCTTAATATCGA	153	144	108	176	154	239	162	220951501454263	0.491	190163723295561	0.0572	0.626	213033376849501	-0.00781	0.499	140541870020672
AHNAK2-1	AHNAK2	x	CAGAGACACCTCGACATCGG	120	237	204	213	225	202	200	230102999566398	0.19	0.755184645249279	0.45	0.91	22718416065365	-0.00537	0.195	114076371586842
AHNAK2-2	AHNAK2	x	GGCCCCAGGCGAGTCCATCG	138	117	157	187	172	166	156	219312459835446	0.35	147970093172983	0.139	0.751	213777596131347	-0.00835	0.358	127456062731926
AHNAK2-3	AHNAK2	x	GGCCCCGAAATAGACATCAA	176	137	164	167	216	205	178	225042000230889	0.302	132430017147401	0.185	0.793	220139712432045	-0.00685	0.309	123285232546381
AHNAK2-4	AHNAK2	x	GGGGCCGATACCCCGAACGA	108	78	82	73	50	101	82	191381385238372	-0.259	-0.73005027791118	0.465	0.915	195101353930913	-0.026	-0.233	0.835666958921853
AHNAK-3	AHNAK	x	GTGATGCTACCCCCAATTTG	277	225	237	286	279	304	268	242813479402879	0.234	12869967582346	0.198	0.801	239152318367516	-0.00135	0.235	117609125029096
AHNAK-4	AHNAK	x	TGTTAACATTGAAGGACCAG	260	158	251	157	218	182	204	23096301674259	-0.264	-108734131304256	0.277	0.846	234830486304816	-0.00513	-0.259	0.832775770880549
AHR-1	AHR	x	ATCGCAAACAAAGCCAACTG	269	315	324	109	98	126	207	231597034545692	-1.45	-676697858949523	1.31e-11	7.01e-08	248096459380142	-0.00495	-1.45	0.366021423986406
AHR-2	AHR	x	CTTACTTCGGATATGGGACT	335	331	340	75	135	118	222	234635297445064	-1.62	-704151290251389	1.9e-12	1.09e-08	252547672600025	-0.00413	-1.62	0.325335463860483
AHR-3	AHR	x	TACCACATCCACTCTAAGCA	418	489	382	162	158	141	292	246538285144842	-1.48	-804192470052936	8.84e-16	9.43e-12	263313166263374	4.38e-05	-1.48	0.358488812003957
AHR-4	AHR	x	TTATAACAGACTACTGTCTG	312	346	276	134	124	167	226	23541084391474	-1.14	-542589752618066	5.77e-08	0.000154	249322562151043	-0.00391	-1.14	0.45375957765858
AHRR-1	AHRR	x	AGGAAGGCCGAGTACTCGGT	132	111	89	56	91	75	92	196378782734556	-0.581	-179416765497218	0.0728	0.661	204401682898437	-0.0227	-0.558	0.668500247702567
AHRR-2	AHRR	x	CATTTATGACTACATCCACG	120	116	89	158	156	159	133	212385164096709	0.541	21313302449711	0.0331	0.542	203476210625921	-0.0119	0.553	145498068363476
AHRR-3	AHRR	x	CTGTGCGAATCGGAACTGCA	5	7	3	1	6	5	4	0.602059991327962	-0.322	-0.242024493929655	0.809	NA	0.698970004336019	-0.0659	-0.256	0.799960128332753
AHRR-4	AHRR	x	GCTGTCGCTGTTCTGCATTG	243	225	209	157	206	209	208	231806333496276	-0.243	-115038952178761	0.25	0.831	235346741396548	-0.0049	-0.238	0.844986384412514
AHSA1-1	AHSA1	x	CCAGTGCCAGTTGTTGACGT	391	481	449	432	347	439	423	262634036737504	-0.117	-0.73495401789344	0.462	0.914	264378156289486	0.00634	-0.123	0.922103117912631
AHSA1-2	AHSA1	x	TAAGAGTGATCTTACAAGTG	134	61	171	93	90	71	103	201283722470517	-0.527	-145687840192849	0.145	0.758	208635983067475	-0.0192	-0.508	0.693996359507796
AHSA1-3	AHSA1	x	TGAGCCTGACACAAATCTCG	343	308	361	280	279	281	309	248995847942483	-0.269	-161344862353593	0.107	0.714	252805925778412	0.000953	-0.27	0.829894585589983
AHSA1-4	AHSA1	x	TTTGTCTGATGAAAACAGCG	447	348	474	370	322	350	385	25854607295085	-0.284	-170005039014977	0.0891	0.686	262634036737504	0.00472	-0.289	0.821310700752066
AHSA2-1	AHSA2	x	AACGAAAGCTATGGCAACCC	413	343	380	283	359	305	347	254032947479087	-0.263	-155356327565143	0.12	0.732	257825707665534	0.00291	-0.266	0.833353207159218
AHSA2-2	AHSA2	x	CACAAAATTCAGTGCAACCA	330	247	298	295	335	324	305	248429983934679	0.125	0.69753515959982	0.485	0.919	246488679830265	0.000743	0.124	109050773266526
AHSA2-3	AHSA2	x	GGGTGTAAGGATTCCCACTG	130	171	150	107	150	113	137	213672056715641	-0.286	-109113156860371	0.275	0.846	21770552871583	-0.0112	-0.275	0.820172911196726
AHSA2-4	AHSA2	x	TAGCATCTTCACTGTAAAGG	195	227	222	250	278	264	239	237839790094814	0.298	158383543522232	0.113	0.723	233176461264015	-0.00314	0.301	122943886725458
AHSG-1	AHSG	x	AGACACTGTAAACTCCACAT	223	169	219	135	108	127	164	22148438480477	-0.724	-304005394542767	0.00237	0.221	230891995552289	-0.00767	-0.716	0.605416541975277
AHSG-2	AHSG	x	AGATTGATGAAGTAAAGGTG	264	187	295	148	136	299	222	234635297445064	-0.356	-12441502482283	0.213	0.812	239561757275301	-0.00413	-0.352	0.781327880172317
AHSG-3	AHSG	x	GCAACACTCAGTGAGAAGCT	177	198	125	192	150	249	182	226007138798507	0.241	0.929157078115428	0.353	0.881	222184874961636	-0.00662	0.248	118181154693437
AHSG-4	AHSG	x	GTTGTCTATAAATCAGCCCT	114	76	75	59	27	75	71	185125834871908	-0.719	-175115688984209	0.0799	0.672	194612461921715	-0.0291	-0.69	0.607518395952508
AHSP-1	AHSP	x	AGAGCCTTGTCTCGCTCTTG	696	676	640	803	724	698	706	28488047010518	0.145	123230958921599	0.218	0.815	282650672166423	0.0152	0.13	110573065332027
AHSP-2	AHSP	x	CATCAACTATTACAGGCAGC	103	188	206	129	121	128	146	216435285578444	-0.395	-138812313814367	0.165	0.776	221923513401367	-0.00967	-0.385	0.760489376620505
AHSP-3	AHSP	x	GCTGAACTCCTTCAATCCTG	143	159	107	167	180	71	138	213987908640124	0.0314	0.095400482721705	0.924	0.992	213460205328768	-0.011	0.0424	102200340294687
AHSP-4	AHSP	x	TGAAGAAGACATGGTGACTG	148	166	179	161	170	127	158	219865708695442	-0.106	-0.446657470317646	0.655	0.956	221572566455757	-0.00815	-0.0978	0.929160674250913
AICDA-1	AICDA	x	ACCGCAAGGCTGAGCCCGAG	281	297	370	257	432	432	345	253781909507327	0.242	115146141806023	0.25	0.831	24996870826184	0.00281	0.239	118263100024414
AICDA-2	AICDA	x	CTCACAGAAGTAGAGGCGCG	169	157	195	284	207	183	199	229885307640971	0.371	16017713698148	0.109	0.717	223971646857986	-0.00544	0.376	129324893188749
AICDA-3	AICDA	x	TCTCCAGAACGGCTGCCACG	6	8	12	5	15	2	8	0.903089986991944	-0.241	-0.226480578463056	0.821	NA	0.937852093251155	-0.0672	-0.174	0.84615859660029
AICDA-4	AICDA	x	TGTCGGGCACAGTCGTAGCA	334	204	390	326	282	241	296	247129171105894	-0.128	-0.561926351939917	0.574	0.941	24904267214992	0.000263	-0.128	0.915099168127928
AIDA-1	AIDA	x	AGCAAGACATCTACAAAAGG	386	204	282	309	280	309	295	246982201597816	0.0424	0.194186399293584	0.846	0.982	24633952302129	0.000209	0.0422	102982557213175
AIDA-2	AIDA	x	GAAGTGCAGCTTTACAGGTA	552	537	592	527	561	599	561	274896286125616	0.00514	0.0399647004671112	0.968	0.996	274844645871981	0.0112	-0.00606	10035691307403
AIDA-3	AIDA	x	GGCGCCGACTTCGACTCTTG	267	217	239	268	273	239	250	239794000867204	0.109	0.581668575798815	0.561	0.939	238201704257487	-0.00245	0.111	107848043169445
AIDA-4	AIDA	x	TTCCTGCTAGAGTTCCCGGT	316	426	339	258	183	311	306	248572142648158	-0.524	-246927936259562	0.0135	0.42	255670443923365	0.000796	-0.525	0.695440985854994
AIF1-1	AIF1	x	AAAAGCTTTCGGACTGCTGA	195	235	284	291	225	299	255	240654018043396	0.191	0.913590268867072	0.361	0.883	237657695705651	-0.00214	0.193	114155470712677
AIF1-2	AIF1	x	CAAACTCCATGTATTTCTCT	179	184	145	196	155	165	171	223299611039215	0.0225	0.0979220273494479	0.922	0.992	222874245756426	-0.00723	0.0297	101571806093096
AIF1-3	AIF1	x	TGCTATATTTGGGATCGTCT	264	218	268	175	208	250	230	236172783601759	-0.245	-116646142065723	0.243	0.829	239794000867204	-0.00368	-0.241	0.843815796130018
AIF1-4	AIF1	x	TTTCAGGGACATGATATCTG	448	352	396	348	394	376	386	258658730467176	-0.0973	-0.611787103313774	0.541	0.934	260060992493273	0.00477	-0.102	0.934780795337914
AIF1L-1	AIF1L	x	ATGATCTCAGAGGTGACAGG	228	198	214	158	288	169	209	232014628611105	-0.0575	-0.231459721286133	0.817	0.979	232905871926422	-0.00484	-0.0527	0.960927838461034
AIF1L-2	AIF1L	x	CAGACCTGATGTCTTTAAAG	155	114	117	105	117	118	121	208278537031645	-0.183	-0.681749357121201	0.495	0.921	210946604995209	-0.0144	-0.169	0.880869374126979
AIF1L-3	AIF1L	x	GAGCTCAGCAACAGGTTCCA	215	218	173	252	232	287	230	236172783601759	0.347	171994634723197	0.0854	0.68	230535136944662	-0.00368	0.351	127191300674357
AIF1L-4	AIF1L	x	GAGGCTGGCCGAGATCAACC	54	88	136	75	132	81	94	19731278535997	0.051	0.135489074246988	0.892	0.988	196692354119841	-0.022	0.073	103598276356002
AIFM1-1	AIFM1	x	AGACACTGCGATTCAAACAG	81	65	74	29	45	33	54	173239375982297	-1.04	-261769491201744	0.00885	0.367	186530142610254	-0.0348	-1.01	0.486327473706143
AIFM1-2	AIFM1	x	ATTGTGGGCTTATCAACAGT	107	119	204	115	85	103	122	208635983067475	-0.505	-163609327271114	0.102	0.706	215634720085992	-0.0142	-0.491	0.70466037757101
AIFM1-3	AIFM1	x	GGAATACTCACCAGATAACG	119	106	105	80	101	83	99	199563519459755	-0.322	-111584860394715	0.264	0.84	204139268515822	-0.0204	-0.302	0.799960128332753
AIFM1-4	AIFM1	x	TCAATTACGATTATCGGTGG	59	43	44	34	53	78	52	17160033436348	0.176	0.404809665283865	0.686	0.96	168723160106477	-0.0356	0.212	112974721457012
AIFM2-1	AIFM2	x	CACTCTCATTCACTCCCAAG	48	89	63	76	106	76	76	188081359228079	0.367	10219324442899	0.307	0.861	182390874094432	-0.0277	0.395	128966825065589
AIFM2-2	AIFM2	x	CCAGCGCTCACGGTTCATCG	287	167	168	225	225	326	233	236735592102602	0.319	127065524574655	0.204	0.806	231666912997116	-0.0035	0.322	124746557191405
AIFM2-3	AIFM2	x	TCCGGCAGGGGCTAGTAGTG	133	118	165	91	130	106	124	209342168516224	-0.347	-125712842635121	0.209	0.808	214197207590708	-0.0138	-0.333	0.786217292140332
AIFM2-4	AIFM2	x	TGAGCGGGTGAGCAATCTGG	29	35	23	52	39	52	38	157978359661681	0.717	154005894634796	0.124	0.735	146239799789896	-0.0424	0.759	16437603745897
AIFM3-1	AIFM3	x	AGCACTTGGAGAGATACACT	455	465	471	469	404	379	440	264345267648619	-0.152	-103583598326116	0.3	0.858	266620587527238	0.00701	-0.159	0.900001929793512
AIFM3-2	AIFM3	x	CAGCCCTCAGGATTGCGTGG	344	422	401	351	457	342	386	258658730467176	-0.0212	-0.124004295675345	0.901	0.989	258994960132571	0.00477	-0.026	0.985412720260296
AIFM3-3	AIFM3	x	GCTGGCCCGAGGCCGCAACG	330	232	241	157	215	256	238	237657695705651	-0.355	-153832590495777	0.124	0.735	242759429055902	-0.0032	-0.352	0.781869643128594
AIFM3-4	AIFM3	x	TTTCCGAGCCTATGGCATCG	399	498	399	486	524	324	438	26414741105041	0.0417	0.224453047868286	0.822	0.98	263548374681491	0.00693	0.0348	102932601884968
AIG1-1	AIG1	x	CCTCACACCAGACCTACGGA	226	178	244	177	98	200	187	22718416065365	-0.448	-166211369948538	0.0965	0.699	233445375115093	-0.00629	-0.442	0.733058378594605
AIG1-2	AIG1	x	CCTTTATATTAATCGAGATG	100	54	156	131	107	150	116	206445798922692	0.324	0.925318219468883	0.355	0.882	201424043911461	-0.0156	0.34	125179645865399
AIG1-3	AIG1	x	CGATGGCCTTGTAGTTACAC	189	241	298	229	314	146	236	237291200297011	-0.0794	-0.300388929532683	0.764	0.973	238501012459337	-0.00332	-0.0761	0.946451182867749
AIG1-4	AIG1	x	TTCCGTGATTCAGCCACCCT	233	255	244	271	232	220	242	238381536598043	-0.0178	-0.0940313913175624	0.925	0.992	238738982633873	-0.00295	-0.0148	0.987737781486253
AIM1-1	AIM1	x	AAATGGTCTTCGTGAATAGG	168	246	172	177	178	132	179	225285303097989	-0.267	-108966582126602	0.276	0.846	229077636129843	-0.00679	-0.26	0.831045861593648
AIM1-2	AIM1	x	AGAAACCAAAGTTACCGTCT	224	219	205	226	345	327	258	241161970596323	0.471	228268403715081	0.0224	0.488	233445375115093	-0.00196	0.473	138606988565041
AIM1-3	AIM1	x	GCCCAGGAACCATTTCGGCG	137	114	234	127	188	111	152	218184358794477	-0.187	-0.607310628880369	0.544	0.935	22086204838826	-0.00882	-0.178	0.878430468238362
AIM1-4	AIM1	x	GTGTCACAGCCCACGACTGA	246	232	190	255	204	303	238	237657695705651	0.19	0.891305804579395	0.373	0.887	234765520775588	-0.0032	0.193	114076371586842
AIM1L-1	AIM1L	x	CTGGGATTGGAACTGCAGGG	3	1	2	1	2	2	2	0.301029995663981	-0.263	-0.136066426964572	0.892	NA	0.301029995663981	-0.0515	-0.212	0.833353207159218
AIM1L-2	AIM1L	x	GCCTCGAACTACCCTTATGG	240	160	227	213	289	200	222	234635297445064	0.163	0.705040731904159	0.481	0.918	232014628611105	-0.00413	0.167	111961288865424
AIM1L-3	AIM1L	x	GCTTGTCTCTGATCCCACCG	239	242	248	327	337	320	286	245636603312904	0.433	255913809596048	0.0105	0.39	238560627359831	-0.000293	0.433	135003798512275
AIM1L-4	AIM1L	x	GTGTCACTCGGTATTCCTCG	273	362	478	332	396	350	365	256229286445647	-0.0461	-0.23237316474889	0.816	0.979	256937390961505	0.00379	-0.0499	0.968551052056761
AIM2-1	AIM2	x	CCTGGATAACATCACTGATG	372	413	409	504	360	346	401	260314437262018	0.0192	0.110170588386977	0.912	0.99	259988307207369	0.00542	0.0138	101339737712869
AIM2-2	AIM2	x	CCTTATCCTACCTTAACATG	234	241	261	223	253	271	247	239269695325967	0.0214	0.114078903463917	0.909	0.99	238975655961784	-0.00264	0.024	101494390977765
AIM2-3	AIM2	x	CTTGATGATTCAAAATGCTG	230	217	236	258	194	134	212	232633586092875	-0.221	-0.912398911647684	0.362	0.883	235729944896187	-0.00467	-0.216	0.857970530428691
AIM2-4	AIM2	x	GCAAGATATTATCGGCACAG	110	164	97	134	61	100	111	204532297878666	-0.331	-0.975909503468563	0.329	0.87	209225265489538	-0.0169	-0.314	0.794985250948974
AIMP1-1	AIMP1	x	AACCAATTCGAAGATCCAGA	243	191	271	232	232	174	224	235024801833416	-0.144	-0.660082534492781	0.509	0.926	237106786227174	-0.00402	-0.14	0.905006462882905
AIMP1-2	AIMP1	x	ACCATAGAATTAGCGTGCAG	466	509	537	418	556	555	507	270500795933334	0.0161	0.105870962197901	0.916	0.991	270243053644553	0.00944	0.00666	101122217100181
AIMP1-3	AIMP1	x	GCAGTAACAACCGTATCTTC	159	86	177	145	121	158	141	214921911265538	0.00682	0.023182419881612	0.982	0.998	214819119624201	-0.0105	0.0173	100473845491034
AIMP1-4	AIMP1	x	GCCCCAAGGACAGTTGTCAG	97	185	108	162	172	166	148	217026171539496	0.358	128219143665843	0.2	0.802	211394335230684	-0.00938	0.367	128164792416019
AIMP2-1	AIMP2	x	CCCCGCCAAGACTATCAGCT	130	98	92	134	93	166	119	207554696139253	0.296	0.986709665520666	0.324	0.868	202802872360024	-0.0149	0.311	122773568391506
AIMP2-2	AIMP2	x	GTTGGGGAGCCGGTACATGC	50	93	103	31	62	46	64	180617997398389	-0.824	-197609206996185	0.0481	0.6	191381385238372	-0.0312	-0.793	0.564873607285062
AIMP2-3	AIMP2	x	TGTAACCAACATAATCCAAG	64	100	69	71	62	78	74	186923171973098	-0.143	-0.412768929970772	0.68	0.959	189023466630636	-0.0282	-0.115	0.905633983017823
AIMP2-4	AIMP2	x	TTCAGCGCCCCGTAATCCTG	208	160	189	149	168	244	186	226951294421792	0.0103	0.0420905332720234	0.966	0.996	226873394045407	-0.00636	0.0167	100716496234914
AIP-1	AIP	x	ACGCTGCACAGTGACGACGA	497	469	402	338	462	431	433	263648789635337	-0.152	-0.927090481872107	0.354	0.882	265896484266444	0.00674	-0.159	0.900001929793512
AIP-2	AIP	x	CAAAAACGTGTGATACAGGA	189	194	176	151	88	133	155	219033169817029	-0.588	-228213884100341	0.0225	0.489	227029055316676	-0.00846	-0.58	0.665264520540343
AIP-3	AIP	x	CAAGAGTCTCCGCAACATCG	415	386	383	289	454	333	377	257634135020579	-0.138	-0.757127386531031	0.449	0.91	259623044766724	0.00435	-0.142	0.90877811644852
AIP-4	AIP	x	CGTGTGCACCATGCGAGAAG	267	251	344	228	137	193	237	23747483460101	-0.627	-274056119554895	0.00613	0.32	245838601110505	-0.00326	-0.624	0.647521499427212
AIPL1-1	AIPL1	x	CGTGTGGTAGGCGAACATGT	71	48	49	66	117	122	79	189762709129044	0.86	235781309390393	0.0184	0.459	17481880270062	-0.0269	0.887	181503831063432
AIPL1-2	AIPL1	x	GGACAGTCATTGACGACAGT	345	317	370	365	264	347	335	252504480703685	-0.0805	-0.452207999835535	0.651	0.956	253655844257153	0.0023	-0.0828	0.945729824940826
AIPL1-3	AIPL1	x	TGCCCCGAGTGATTACCAGA	381	427	565	425	362	382	424	262736585659273	-0.232	-134733526489809	0.178	0.787	266054928251709	0.00638	-0.238	0.851453707748945
AIPL1-4	AIPL1	x	TTTATCCCCACAGCACACGG	192	141	212	195	204	134	180	225527250510331	-0.0321	-0.127849366000696	0.898	0.988	225927524755698	-0.00673	-0.0254	0.97799568160295
AIRE-1	AIRE	x	AGTTCGAAGACTCCGGCAGT	115	173	142	106	187	117	140	214612803567824	-0.0687	-0.237271457037013	0.812	0.978	215634720085992	-0.0106	-0.0581	0.953496798759939
AIRE-2	AIRE	x	CCCCGCTCACCGTTCCCGAG	232	274	227	285	244	214	246	239093510710338	0.0195	0.0986590045898741	0.921	0.992	238798271992147	-0.0027	0.0222	101360812910067
AIRE-3	AIRE	x	CGCGCTGGCTGACCACGACG	181	153	195	152	156	82	153	21846914308176	-0.44	-157688125739117	0.115	0.724	224633441731552	-0.00869	-0.431	0.737134608645551
AIRE-4	AIRE	x	GTGGCGGTACCAAAGCCTTG	7	10	2	1	1	2	4	0.602059991327962	-2.25	-147382863721982	0.141	NA	0.801632346233166	-0.0659	-2.18	0.210224103813429
AJAP1-1	AJAP1	x	AGCCATGTTTCAGCTCGCCG	222	245	260	290	276	218	252	240140054078154	0.109	0.558518974726998	0.576	0.941	238441315613938	-0.00233	0.111	107848043169445
AJAP1-2	AJAP1	x	CCATGACGCTGCAGACTAAG	1	1	2	1	1	7	2	0.301029995663981	1.17	0.614379795239728	0.539	NA	0.1249387366083	-0.0515	1.22	225011696937762
AJAP1-3	AJAP1	x	CGGTCTCCATCCTACAAACA	319	296	332	320	371	345	330	251851393987789	0.13	0.795395758697386	0.426	0.903	249922872428361	0.00205	0.128	109429370126074
AJAP1-4	AJAP1	x	CTCCTAAAACTCCACAGCCG	180	185	131	201	153	223	179	225285303097989	0.218	0.89762125521275	0.369	0.885	221836042177054	-0.00679	0.225	116312004154785
AJUBA-1	AJUBA	x	AAATCGGGGGGCAACGACTG	395	408	395	450	282	415	391	259217675739587	-0.0628	-0.345772684152746	0.73	0.967	260133556333363	0.00499	-0.0678	0.957404173396658
AJUBA-2	AJUBA	x	ACCCGACGGCTCAATCCCCG	314	218	327	286	333	189	278	244404479591808	-0.0883	-0.380966454485353	0.703	0.963	245687190911158	-0.000754	-0.0875	0.940630488564255
AJUBA-3	AJUBA	x	TAGGTCCCCCCAACCCACTT	425	378	390	430	442	327	399	260097289568675	0.00724	0.0440005632712452	0.965	0.996	259951918895068	0.00534	0.0019	100503099877466
AJUBA-4	AJUBA	x	TGGACCGATTGTACGCTCAG	186	203	313	132	176	141	192	228330122870355	-0.645	-256266601246679	0.0104	0.387	236921585741014	-0.00592	-0.639	0.639492790638714
AK1-1	AK1	x	AAGAGTTTGAGCGACGGGTA	436	456	380	437	494	513	453	265609820201283	0.183	124002798979798	0.215	0.814	262736585659273	0.00751	0.175	113524210214606
AK1-2	AK1	x	AGTATTGACTTTGGCCACCA	437	588	412	414	343	430	437	264048143697042	-0.276	-160228379148103	0.109	0.717	268033551341456	0.00689	-0.283	0.82587766493572
AK1-3	AK1	x	GATTGATGGCTACCCGCGGG	119	96	148	126	77	143	118	207188200730613	-0.0692	-0.223812642055166	0.823	0.98	208278537031645	-0.0151	-0.0541	0.953166399208259
AK1-4	AK1	x	GCCCTGAGACCATGACCCAG	407	313	281	366	266	338	328	251587384371168	-0.0454	-0.233581943528578	0.815	0.979	252331282275966	0.00194	-0.0473	0.969021109985978
AK2-1	AK2	x	AGGCTGATTCACCCCAAGAG	51	57	27	93	89	65	64	180617997398389	0.872	218965587747983	0.0285	0.524	165321251377534	-0.0312	0.903	183019833625586
AK2-2	AK2	x	ATGGATGCTGGGAAACTGGT	732	694	790	646	751	701	719	285672889038288	-0.0789	-0.660912605599086	0.509	0.925	286844850133673	0.0155	-0.0944	0.946779254699453
AK2-3	AK2	x	GTCCCTTTACCGGCCCCGGG	201	164	212	273	206	231	214	233041377334919	0.299	140642799171178	0.16	0.771	228405455843607	-0.00456	0.304	123029134475114
AK2-4	AK2	x	GTGAGGCAGGCAGAAATGGT	258	341	306	335	353	240	306	248572142648158	0.0362	0.183303107481546	0.855	0.983	247952732448554	0.000796	0.0354	102540937995996
AK3-1	AK3	x	AGAAATTGGCGTGTTAGCCA	479	598	594	622	456	537	548	273878055848437	-0.0492	-0.32062711125423	0.748	0.97	274585519517373	0.0108	-0.06	0.966472106294542
AK3-2	AK3	x	ATCCAACAGCCAGCTATACT	182	171	211	155	144	185	175	224303804868629	-0.221	-0.973203499339932	0.33	0.871	227415784926368	-0.00701	-0.214	0.857970530428691
AK3-3	AK3	x	GATCTGATAAGCTCTATCTA	241	292	232	233	291	280	262	241830129131975	0.0717	0.373102520020993	0.709	0.964	240654018043396	-0.00171	0.0734	105095434655143
AK3-4	AK3	x	TGTAGTGATGCGCGACGACA	371	536	463	299	288	450	401	260314437262018	-0.402	-202698055350483	0.0427	0.582	265959931243674	0.00542	-0.407	0.75680839648479
AK4-1	AK4	x	ATTCTTACATGTACATGAGG	386	497	356	319	357	339	376	257518784492766	-0.288	-168329140150736	0.0923	0.691	26159500516564	0.00431	-0.292	0.819036697859828
AK4-2	AK4	x	GAGAACATCAAGGCCAGCAC	313	337	345	306	289	248	306	248572142648158	-0.239	-13930419620267	0.164	0.774	252070182602606	0.000796	-0.24	0.847332434946118
AK4-3	AK4	x	GTGCCCTTGCCCGAGCCGGG	239	162	148	260	211	311	222	234635297445064	0.51	213980167571235	0.0324	0.539	226245108973043	-0.00413	0.514	142405019559707
AK4-4	AK4	x	TCCGAGTTGGAGAACAGGCG	216	204	182	110	207	156	179	225285303097989	-0.348	-136413880433166	0.173	0.782	230247523653816	-0.00679	-0.341	0.78567251666758
AK5-1	AK5	x	ACAATGTAAAAGCTACCCAA	134	187	186	130	153	129	153	21846914308176	-0.299	-121201078216807	0.226	0.819	222788670461367	-0.00869	-0.29	0.81281560198432
AK5-2	AK5	x	ACTCAAACTTTCCATATCGG	130	136	157	116	111	122	129	211058971029925	-0.277	-109977740207081	0.271	0.844	214921911265538	-0.0127	-0.264	0.825305408512657
AK5-3	AK5	x	CAGGAATACCACCAAATCGG	53	54	82	74	94	39	66	181954393554187	0.131	0.320185660871663	0.749	0.97	179934054945358	-0.0305	0.162	109505247079357
AK5-4	AK5	x	CCTTCGATGATATTGGACAC	146	212	166	153	197	150	171	223299611039215	-0.0676	-0.278551200875717	0.781	0.975	224221003226406	-0.00723	-0.0604	0.954224080966699
AK6-1	AK6	x	CAGGGAAGAAATCACAACCA	15	17	26	26	32	25	24	138021124171161	0.517	0.878814645499867	0.38	0.89	128630673884327	-0.052	0.569	143097652002291
AK6-2	AK6	x	GTGGGTGATTTAGCTCGAGA	90	52	82	102	94	77	83	191907809237607	0.285	0.843845560685957	0.399	0.895	18731267636145	-0.0256	0.311	121841026367519
AK6-3	AK6	x	TGTACGAAAGACTTGAAACA	77	54	61	57	24	22	49	169019608002851	-0.898	-190836843731133	0.0563	0.624	180617997398389	-0.0369	-0.861	0.536630143196727
AK6-4	AK6	x	TTAGATAACCAAATGAGAGA	33	59	22	21	60	44	40	160205999132796	0.133	0.245605543741605	0.806	0.978	157978359661681	-0.0413	0.174	109657158858789
AK7-1	AK7	x	AATGGAAGCGCTCTTTGTGA	195	178	268	203	230	256	222	234635297445064	0.104	0.472465056078842	0.637	0.953	232973677479916	-0.00413	0.108	10747491728555
AK7-2	AK7	x	ACTGCATCACATCCAACTGA	275	243	277	345	227	362	288	245939248775923	0.232	113589164412393	0.256	0.834	242324587393681	-0.00018	0.232	117446197121365
AK7-3	AK7	x	AGCTTCCTCAACCAAAGTGA	260	186	212	172	216	175	204	23096301674259	-0.225	-101915243373607	0.308	0.861	234110463889429	-0.00513	-0.22	0.855595025682602
AK7-4	AK7	x	CGCTCTACTTACGGGGTCCA	145	217	184	136	182	189	176	224551266781415	-0.107	-0.436957092415281	0.662	0.957	226007138798507	-0.00696	-0.1	0.928516852306729
AK8-1	AK8	x	CTGGATGAGCTCGCCAAACG	115	157	188	144	117	98	136	213353890837022	-0.358	-128249720166485	0.2	0.802	218563657696191	-0.0114	-0.347	0.780245480173703
AK8-2	AK8	x	GTATCATAGGAACATCGTCA	114	99	131	124	128	176	129	211058971029925	0.315	116265095686929	0.245	0.83	205943718785187	-0.0127	0.328	124401165329847
AK8-3	AK8	x	TGAACGGGGCATTAGTACGA	168	162	134	80	149	135	138	213987908640124	-0.35	-123462575909137	0.217	0.814	218939672583522	-0.011	-0.339	0.784584097896751
AK8-4	AK8	x	TTCGGGTGGCCAGTCAAAGG	148	111	58	68	96	90	95	197772360528885	-0.32	-0.885025831223525	0.376	0.888	202393800749809	-0.0217	-0.298	0.801069877589622
AK9-1	AK9	x	ACATATACAGTAGAGACCAG	599	466	573	517	558	529	540	273239375982297	-0.0303	-0.215637856810544	0.829	0.98	273719264270474	0.0105	-0.0408	0.979216654035547
AK9-2	AK9	x	AGGCATCTCACGATACCCGA	305	272	377	284	294	279	302	248000694295715	-0.155	-0.851667968769292	0.394	0.894	250242711998443	0.000585	-0.156	0.898132372883934
AK9-3	AK9	x	TACTGCATGGGAGTTAACTG	585	546	528	519	557	563	550	274036268949424	-0.0175	-0.136632782168078	0.891	0.988	27427251313047	0.0108	-0.0283	0.987943197140516
AK9-4	AK9	x	TCACGGGCTTTATCAAAACG	352	391	390	471	396	404	401	260314437262018	0.166	108512071757296	0.278	0.847	257710865514373	0.00542	0.161	112194348053048
AKAP10-1	AKAP10	x	ACTGGCTACTGTAAGTGTAG	276	275	243	258	319	262	272	24345689040342	0.0795	0.432622594061363	0.665	0.958	242269924770743	-0.00111	0.0806	105665176949768
AKAP10-2	AKAP10	x	CAGATTGAAGTGCTGACCAG	419	428	333	449	474	322	404	260638136511061	0.0774	0.428432463942906	0.668	0.958	259476075258646	0.00555	0.0718	105511481646124
AKAP10-3	AKAP10	x	GGGCCAATATGATGGACAGG	301	397	467	446	423	423	410	261278385671974	0.149	0.860988175796855	0.389	0.892	258920467064238	0.0058	0.143	110880064360307
AKAP10-4	AKAP10	x	TTGTTTATGACTCATTCAGA	400	353	375	354	454	552	415	261804809671209	0.27	153670784426056	0.124	0.735	257518784492766	0.00601	0.264	120580782769076
AKAP1-1	AKAP1	x	ACAGACATGAGATTGCGACC	161	233	137	110	168	159	161	220682587603185	-0.281	-10300528779148	0.303	0.859	224797326636181	-0.00789	-0.273	0.823020345278708
AKAP11-1	AKAP11	x	AAGTGTAGTGCCATCGACAC	171	210	181	182	151	197	182	226007138798507	-0.0846	-0.378942114816154	0.705	0.963	22726150608494	-0.00662	-0.078	0.943045967535861
AKAP11-2	AKAP11	x	AATATTAACAGTATTAAACA	153	162	177	229	227	211	193	228555730900777	0.439	212171553590273	0.0339	0.546	22148438480477	-0.00584	0.445	13556643268
AKAP11-3	AKAP11	x	AGATGGCAGTGTCTCTAGGG	84	83	132	143	122	90	109	203742649794062	0.248	0.792399578981738	0.428	0.904	199854993360477	-0.0174	0.265	118755966607341
AKAP11-4	AKAP11	x	TACTGGTATAAGGTACACCT	201	142	203	185	221	189	190	227875360095283	0.124	0.544242316228507	0.586	0.944	226007138798507	-0.00607	0.13	108975211221333
AKAP1-2	AKAP1	x	GCTTCTCTGCGGGGACTACG	120	143	157	92	172	230	152	218184358794477	0.234	0.762349101068267	0.446	0.909	214612803567824	-0.00882	0.243	117609125029096
AKAP12-1	AKAP12	x	CTGGGGGAGAAATTTCTGCG	120	181	122	103	99	128	126	210037054511756	-0.358	-127610193209243	0.202	0.805	214921911265538	-0.0133	-0.345	0.780245480173703
AKAP12-2	AKAP12	x	GTGCTGTCCAAACCCCCCGA	172	175	177	141	229	292	198	229666519026153	0.337	130892658172963	0.191	0.796	224221003226406	-0.0055	0.342	12631272618458
AKAP12-3	AKAP12	x	TCATATTCAGCTGATAACCG	132	177	157	146	173	103	148	217026171539496	-0.143	-0.535921615949565	0.592	0.944	219126466197034	-0.00938	-0.134	0.905633983017823
AKAP12-4	AKAP12	x	TGAAGCCGCACTGTTAACTG	164	193	140	154	112	227	165	221748394421391	-0.0117	-0.0418356863993309	0.967	0.996	221923513401367	-0.0076	-0.0041	0.991922973877825
AKAP1-3	AKAP1	x	GTCCGGCAACTCTTCACTGG	134	153	137	104	88	96	119	207554696139253	-0.558	-212504953159785	0.0336	0.545	215024460187307	-0.0149	-0.543	0.679243142274472
AKAP13-1	AKAP13	x	AGAGAGTGTACCTCAAAACA	452	402	464	395	390	452	426	262940959910272	-0.0915	-0.614815958645661	0.539	0.933	264279415553833	0.00646	-0.098	0.938546415542129
AKAP13-2	AKAP13	x	ATTCGAATGAGCCTGATACG	269	209	204	277	186	135	213	232837960343874	-0.19	-0.733172684705408	0.463	0.914	235666311993682	-0.00462	-0.185	0.876605721316035
AKAP13-3	AKAP13	x	CAGACACCCATTCAGTGGTG	392	392	537	437	510	439	451	265417654187796	0.0693	0.421014280438858	0.674	0.958	264378156289486	0.00743	0.0619	104920748145453
AKAP13-4	AKAP13	x	TGTGACGGTGGATGTTACAG	143	103	145	157	171	133	142	215228834438306	0.238	0.92364636143	0.356	0.882	21150555026762	-0.0103	0.248	117935659226122
AKAP1-4	AKAP1	x	TGCAACCTTGCCAACCGTGG	142	187	128	99	142	206	151	217897694729317	-0.0319	-0.108813098951609	0.913	0.991	218279494535019	-0.00895	-0.0229	0.978131269990864
AKAP14-1	AKAP14	x	ATGGCGTAGAGTTTGTAGAG	280	370	337	342	336	302	328	251587384371168	-0.0103	-0.059315089829751	0.953	0.995	251719589794997	0.00194	-0.0122	0.992886009127616
AKAP14-2	AKAP14	x	CAGAGATTCGTGCTACGGGT	173	300	242	237	282	264	250	239794000867204	0.131	0.594561956562125	0.552	0.937	237718478708142	-0.00245	0.133	109505247079357
AKAP14-3	AKAP14	x	GACTCACGGTGAATTCACTG	465	487	512	399	599	478	490	269019608002851	0.0118	0.0729275651026569	0.942	0.993	268841982200271	0.00886	0.00294	100821267725124
AKAP14-4	AKAP14	x	TATGCTGTTAAGATTGTGGA	570	449	530	556	578	441	521	271683772329952	0.024	0.156673986401623	0.876	0.986	271293016303954	0.00991	0.0141	101677467329196
AKAP17A-1	AKAP17A	x	ACATGAACGAGACCCTGCCG	511	537	360	459	444	448	460	266275783168157	-0.0596	-0.360033822558534	0.719	0.966	267148140008643	0.00777	-0.0674	0.959530120687068
AKAP17A-2	AKAP17A	x	GCTCTTGGAAATACGCAGCG	201	188	332	240	226	228	236	237291200297011	-0.0551	-0.235791958765726	0.814	0.979	238081400999977	-0.00332	-0.0518	0.962527723451679
AKAP17A-3	AKAP17A	x	GTACTCGCGGTACTGCACAT	609	455	407	432	488	322	452	265513843481138	-0.244	-129672761799869	0.195	0.799	269049141800787	0.00747	-0.251	0.844400887423782
AKAP17A-4	AKAP17A	x	GTGATGCCTCAATTAAGAAG	320	367	383	296	332	281	330	251851393987789	-0.235	-140210172949254	0.161	0.772	255226252296555	0.00205	-0.237	0.84968499913865
AKAP2-1	AKAP2	x	ACAGCGAGCCTTCTAAACGT	257	364	311	308	317	251	301	247856649559384	-0.0894	-0.46842712753976	0.639	0.954	249229465763432	0.000532	-0.0899	0.939913567003467
AKAP2-2	AKAP2	x	AGAGATCCGCTATCTAGATG	201	160	130	194	214	168	178	225042000230889	0.23	0.961867974957554	0.336	0.873	221396023740331	-0.00685	0.237	117283494923188
AKAP2-3	AKAP2	x	CCTATCCAATGATTTCAGCA	212	236	194	214	332	152	223	234830486304816	0.121	0.465522783108187	0.642	0.954	233041377334919	-0.00407	0.125	108748839085488
AKAP2-4	AKAP2	x	TGATATCTGGCTAAAAAGCG	176	194	173	228	188	177	189	227646180417324	0.127	0.588733967878298	0.556	0.938	225767857486918	-0.00615	0.133	109202054574565
AKAP3-1	AKAP3	x	CATGACCTATGCTAACAGTG	195	192	269	192	208	233	215	233243845991561	-0.0515	-0.237399060004227	0.812	0.978	2339782584656	-0.00451	-0.047	0.964932546777353
AKAP3-2	AKAP3	x	GGAATCTCCACAGCGTCACA	282	249	172	212	205	175	216	233445375115093	-0.248	-108557327891374	0.278	0.847	236983407030016	-0.00445	-0.244	0.842062953608416
AKAP3-3	AKAP3	x	GTGAGCACATTATCAAAGAG	234	229	202	127	180	190	194	228780172993023	-0.42	-185018959172528	0.0643	0.641	234570039058344	-0.00577	-0.414	0.747424624317469
AKAP3-4	AKAP3	x	TGGCTATGACTAGATTCGTG	76	69	116	134	129	75	100	2	0.373	110496600709857	0.269	0.843	193951925261862	-0.0201	0.393	129504299885442
AKAP4-1	AKAP4	x	AAAGCAAGGAAACTCATGCA	243	273	369	280	396	428	332	252113808370404	0.319	153036532497283	0.126	0.737	246982201597816	0.00215	0.317	124746557191405
AKAP4-2	AKAP4	x	GAACCTGCATAATATTACTG	134	224	123	313	201	188	197	229446622616159	0.545	196930345705941	0.0489	0.603	220502382165417	-0.00557	0.551	145902034424018
AKAP4-3	AKAP4	x	GACACTGTAGCAGTTCTCAG	272	128	210	178	190	209	198	229666519026153	-0.0802	-0.306459900428601	0.759	0.972	23082085802911	-0.0055	-0.0747	0.945926504377806
AKAP4-4	AKAP4	x	GGATTACCAGAGAAGATAGT	164	97	116	149	125	132	130	211394335230684	0.107	0.385672437847293	0.7	0.963	209922009548613	-0.0125	0.12	107698637619305
AKAP5-1	AKAP5	x	AATTCCAGATCAACAAATTG	284	400	253	300	250	248	289	246089784275655	-0.232	-112458978652781	0.261	0.837	249461833616812	-0.000123	-0.232	0.851453707748945
[truncated: 74,086 more rows]

## Sheet: deseq2_ref-unt_exp-bar_rra_n
group_id	items_in_group	lo_value	p	FDR	goodsgrna	rank	log2FcMedian
ABCG2	4	2.7306e-13	2.59e-07	0.000381	4	1	-2.64
AHR	4	1.0751e-10	2.59e-07	0.000381	4	2	-1465
EP300	4	1.098e-08	2.59e-07	0.000381	4	3	-1.83
RBM47	4	6.7326e-07	2.59e-07	0.000381	4	4	-2.24
PTGES3	4	2.3062e-06	2.59e-07	0.000381	4	5	-0.698
CLPTM1	4	2.8377e-06	2.59e-07	0.000381	3	6	-1225
HNRNPA1	4	6.0305e-06	2.59e-07	0.000381	3	7	-1077
OTUD5	4	1.9119e-05	2.59e-07	0.000381	4	8	-1035
SRSF10	4	3.0466e-05	2.59e-07	0.000381	4	9	-1055
ASB7	4	0.00010517	2.59e-07	0.000381	4	10	-1046
CUL5	4	0.00017086	2.59e-07	0.000381	3	11	-0.7105
UBR2	4	0.00029072	2.59e-07	0.000381	4	12	-0.803
PPIA	4	0.00088195	2.59e-07	0.000381	4	13	-0.9245
NPEPPS	4	0.0047524	0.002331	0.002621	4	14	-1.48
SLCO4A1	4	0.0047905	0.002331	0.002621	3	15	-0.9875
CBFB	4	0.0050235	0.002331	0.002621	4	16	-0.6945
CREBBP	4	0.0056773	0.002331	0.002621	4	17	-0.696
CANX	4	0.0067366	0.002849	0.002723	4	18	-1.67
GCLM	4	0.0078191	0.002849	0.002723	4	19	-0.674
GANAB	4	0.0092018	0.002849	0.002723	4	20	-0.7185
SPEN	4	0.020439	0.006993	0.006365	4	21	-0.446
MAFK	4	0.024046	0.007511	0.006526	4	22	-0.745
HTT	4	0.031901	0.11655	0.009686	4	23	-0.4815
EDC3	4	0.033518	0.12173	0.009695	4	24	-0.5285
CRAMP1L	4	0.036754	0.12691	0.009703	4	25	-11345
SEPHS2	4	0.042032	0.14763	0.010853	3	26	-0.602
FLVCR1	4	0.043071	0.15799	0.011184	3	27	-2.18
HNRNPA2B1	4	0.057774	0.22015	0.015017	3	28	-0.8075
PIAS4	4	0.061665	0.23569	0.015017	3	29	-0.572
EIF4ENIF1	4	0.063575	0.23569	0.015017	4	30	-0.6915
EGFR	4	6.58e-06	0.25123	0.01549	4	31	-0.462
MOGS	4	0.067071	0.26677	0.015934	3	32	-1035
FKBP8	4	0.070442	0.27713	0.016052	2	33	-0.794
RLIM	4	0.075327	0.29785	0.016744	3	34	-0.549
ZNF800	4	0.080879	0.32375	0.017189	4	35	-0.5865
MORF4L1	4	0.080959	0.32375	0.017189	3	36	-0.459
FOXK1	4	0.093048	0.35483	0.01833	4	37	-0.878
CSNK2A1	4	0.10096	0.38591	0.019411	4	38	-0.618
EEFSEC	4	0.11108	0.41699	0.020437	4	39	-0.616
ARNT	4	0.16433	0.65527	0.031312	3	40	-1128
SENP1	4	0.20268	0.82102	0.037916	4	41	-0.4215
MIER3	4	0.20994	0.85728	0.037916	3	42	-0.5935
NF2	4	0.21377	0.87023	0.037916	4	43	-0.7025
DIDO1	4	0.21395	0.87282	0.037916	3	44	-0.7345
GATA6	4	0.23096	0.94016	0.038515	4	45	-0.3925
ABCC1	4	0.23162	0.94534	0.038515	4	46	-0.7275
URGCP	4	0.23466	0.96088	0.038515	3	47	-0.666
CPVL	4	0.25195	0.00010075	0.038515	4	48	-0.318
EMC8	4	0.25316	0.00010075	0.038515	3	49	-0.573
UGGT1	4	0.28649	0.00011318	0.042419	3	50	-0.8905
GHR	4	0.30592	0.00011888	0.043698	4	51	-0.3875
UBE2A	3	0.31676	0.00010023	0.038515	2	52	-0.894
ZFR	4	0.33734	0.00012976	0.046796	4	53	-0.5135
EEPD1	4	0.03543	0.00013597	0.04813	4	54	-0.473
SPDYE1	4	0.41929	0.00016239	0.056436	4	55	-0.4445
2014-09-01	4	0.43994	0.00017016	0.05808	4	56	-0.4165
RAD21	4	0.45862	0.00017638	0.059145	3	57	-0.706
PAPPA	4	0.04919	0.00019244	0.06251	3	58	-0.4935
HDAC2	4	0.49294	0.00019295	0.06251	2	59	-0.6175
ZBTB7A	4	0.50277	0.00019917	0.063449	4	60	-0.4885
OGFR	4	0.51471	0.00020331	0.063707	4	61	-0.62
MBD2	4	0.54371	0.00021419	0.066033	3	62	-0.602
PSTK	4	0.05871	0.00023439	0.071114	3	63	-0.659
MATR3	4	0.60257	0.00024165	0.071363	4	64	-0.6655
C16orf72	4	0.60503	0.00024268	0.071363	3	65	-10755
NONO	4	0.66297	0.00026703	0.076917	4	66	-0.618
PGAM2	4	0.66956	0.00026962	0.076917	4	67	-0.522
RFK	4	0.70322	0.00028205	0.079281	3	68	-0.9525
HSF1	4	0.72721	0.00029034	0.080428	2	69	-0.4615
SLC29A4	4	0.73818	0.00029604	0.080835	2	70	-0.31035
KNTC1	4	0.75936	0.0003064	0.081752	3	71	-0.886
MGAT1	4	0.76597	0.00030795	0.081752	2	72	-0.39025
PPME1	4	0.80573	0.0003266	0.085296	3	73	-0.819
MAU2	4	0.82421	0.00033022	0.085296	4	74	-0.549
NT5DC1	4	0.88222	0.00034783	0.088647	2	75	-0.428
ELP3	4	0.92003	0.00036441	0.091649	3	76	-1212
TXNL1	4	0.95696	0.00038435	0.09541	3	77	-0.5975
AP2S1	4	0.00010447	0.00041155	0.098467	3	78	-0.7835
EDC4	4	0.00010456	0.00041207	0.098467	2	79	-0.4425
MRPS24	4	0.0001058	0.00041828	0.098467	4	80	-0.5115
RNF4	4	0.00010587	0.00041828	0.098467	3	81	-0.409
GNPAT	4	0.00010657	0.00042243	0.098467	4	82	-0.3555
SHOC2	4	0.0001146	0.00045143	0.10396	2	83	-0.6175
HDDC2	4	0.00012511	0.00049287	0.111182	2	84	-0.565
GPR6	4	0.00012541	0.00049443	0.111182	3	85	-0.4615
EDEM3	4	0.00013468	0.00053846	0.119675	4	86	-0.4305
CARM1	4	0.00015974	0.00062704	0.136757	4	87	-0.607
TSFM	4	0.0001601	0.00062963	0.136757	4	88	-0.531
HIAT1	4	0.00016747	0.00065086	0.139109	3	89	-0.3945
TDP2	4	0.00016922	0.00065501	0.139109	3	90	-0.553
EZH2	4	0.00018467	0.00070318	0.1476	4	91	-0.596
ARPC4	4	0.00018735	0.00071043	0.1476	4	92	-0.538
IBA57	4	0.00019609	0.00074358	0.150165	4	93	-0.6035
CYTH3	4	0.00019748	0.00074876	0.150165	4	94	-0.573
PHKG1	4	0.00019811	0.00074928	0.150165	3	95	-0.619
HDAC8	4	0.00019957	0.0007542	0.150165	2	96	-0.428
SLC35B4	4	0.00021738	0.0008218	0.161937	4	97	-0.3595
RABEPK	4	0.00022195	0.00083993	0.163821	3	98	-0.4945
EPO	4	0.000229	0.00086221	0.166467	3	99	-0.4035
DDX6	4	0.00023702	0.00088707	0.169554	4	100	-0.704
HEXB	4	0.00023972	0.00089691	0.169738	3	101	-0.5625
RASA4	4	0.00024495	0.00091349	0.17118	4	102	-0.429
SMC5	4	0.0002481	0.00092437	0.171537	3	103	-0.9625
CDCA8	4	0.00025126	0.0009368	0.172173	2	104	-0.6715
RBM12	4	0.00026147	0.00097513	0.177511	2	105	-0.3785
MLXIPL	4	0.000274	0.0010197	0.182664	2	106	-0.2925
CACUL1	4	0.00027574	0.0010259	0.182664	4	107	-0.258
SLAIN2	4	0.00027803	0.0010321	0.182664	3	108	-0.376
TRERF1	4	0.00028485	0.0010539	0.184803	4	109	-0.4055
UBE2K	4	0.00029883	0.0011046	0.191944	3	110	-0.646
NR2F2	4	0.00030885	0.001145	0.196826	3	111	-0.4145
HUWE1	4	0.00031108	0.0011533	0.196826	3	112	-0.631
FKBP9	4	0.00031991	0.0011839	0.197479	4	113	-0.4295
F8A1	4	0.00032193	0.0011906	0.197479	4	114	-0.402
TMEM189-UBE2V1	4	0.00032709	0.0012082	0.197479	3	115	-0.441
CDH4	4	0.0003288	0.001217	0.197479	4	116	-0.3445
SLC28A1	4	0.00033009	0.0012196	0.197479	4	117	-0.251
SLC25A22	4	0.00033281	0.0012277	0.197479	3	118	-0.463
FAR1	4	0.00033345	0.0012295	0.197479	4	119	-0.52
MRGBP	4	0.00034421	0.0012662	0.200843	4	120	-0.402
XBP1	4	0.00034661	0.0012714	0.200843	4	121	-0.3015
AP2M1	4	0.00037071	0.0013693	0.214535	3	122	-0.609
RAB27B	4	0.00038122	0.0014051	0.218345	3	123	-0.3365
TPGS1	4	0.00039005	0.0014325	0.220816	4	124	-0.39
NFASC	4	0.00041028	0.001504	0.22998	4	125	-0.3215
PPM1F	4	0.00041775	0.001532	0.232398	4	126	-0.479
HTR3E	4	0.00042901	0.0015688	0.235265	3	127	-0.4875
PUS7	4	0.0004311	0.0015755	0.235265	3	128	-0.5545
MMGT1	4	0.00045667	0.0016817	0.249175	3	129	-0.5575
EED	4	0.00046736	0.0017216	0.253123	2	130	-0.6035
FAM122A	4	0.00047843	0.0017604	0.253829	2	131	-0.3485
MAPK1	4	0.00048165	0.0017713	0.253829	4	132	-0.4225
CENPE	4	0.00048261	0.001777	0.253829	2	133	-0.22805
KIF20A	4	0.00048559	0.0017837	0.253829	4	134	-0.6165
PEX3	4	0.00049343	0.0018117	0.253829	3	135	-0.5295
PNRC1	4	0.0004939	0.0018122	0.253829	4	136	-0.365
TMEM33	4	0.00049809	0.0018309	0.253829	4	137	-0.29
FOXK2	4	0.00050002	0.0018366	0.253829	4	138	-0.3275
LUC7L2	4	0.00050237	0.0018459	0.253829	3	139	-0.6735
ANKIB1	4	0.00050994	0.0018635	0.25442	4	140	-0.3625
APOL1	4	0.00053288	0.0019536	0.264834	3	141	-0.3505
YTHDF2	4	0.00055234	0.0020059	0.266742	3	142	-0.481
XAGE1B	4	0.00055348	0.002007	0.266742	3	143	-0.485
ECM1	4	0.0005548	0.0020096	0.266742	3	144	-0.407
DCP2	4	0.00057461	0.0020702	0.272143	2	145	-0.4395
TOMM7	4	0.00058154	0.0020867	0.272143	3	146	-0.3675
ZNF716	4	0.00058536	0.002093	0.272143	3	147	-0.427
PDCL	4	0.00059694	0.0021178	0.273515	3	148	-0.4
GTPBP3	4	0.00062437	0.002195	0.28158	2	149	-0.26315
LYG2	4	0.00063662	0.0022276	0.283861	3	150	-0.2855
CEP97	4	0.00064612	0.002251	0.284932	3	151	-0.4725
PRR7	4	0.00066303	0.002295	0.287032	2	152	-0.6095
PNRC2	4	0.00066401	0.0022976	0.287032	3	153	-0.706
HSPA4	4	0.00067144	0.0023193	0.287868	3	154	-0.3395
CHD8	4	0.00067799	0.0023401	0.288566	3	155	-0.6815
ADCK5	4	0.00071039	0.0024276	0.297442	3	156	-0.3015
HOXA9	4	0.00072402	0.0024613	0.299647	3	157	-0.3725
SFPQ	4	0.00073172	0.0024809	0.300132	2	158	-0.66975
NUP188	4	0.00076747	0.0025752	0.309577	3	159	-0.51
UGCG	4	0.00077974	0.0026063	0.309667	3	160	-0.39
CNGA1	4	0.00078054	0.0026084	0.309667	2	161	-0.5755
PIGL	4	0.00080049	0.0026617	0.314051	3	162	-0.4405
C15orf57	4	0.00081455	0.0026918	0.314326	3	163	-0.7235
PIK3C2B	4	0.00081735	0.002697	0.314326	3	164	-0.267
MECOM	4	0.00086598	0.0028311	0.327963	2	165	-0.3617
RIF1	4	0.00091538	0.0029616	0.341018	3	166	-0.45
BRAF	4	0.00096894	0.0031093	0.354019	3	167	-0.433
CDO1	4	0.00098144	0.0031372	0.354019	3	168	-0.4065
EFNA4	4	0.00098564	0.0031486	0.354019	3	169	-0.624
JAGN1	4	0.0010116	0.0032129	0.359128	3	170	-0.523
POU6F2	4	0.0010264	0.0032507	0.359326	3	171	-0.4385
PLEKHG2	4	0.0010275	0.0032522	0.359326	2	172	-0.7715
NDUFA2	4	0.0010581	0.0033382	0.36569	3	173	-0.6605
ZNF777	4	0.0010664	0.0033605	0.36569	2	174	-0.27465
SBDS	4	0.0010694	0.0033672	0.36569	3	175	-0.7975
CDH15	4	0.0010773	0.00339	0.366085	1	176	0.05114
PRPS1L1	4	0.0010934	0.0034325	0.368589	2	177	-0.217
AURKB	3	0.0010972	0.0031279	0.354019	2	178	-0.823
TRIP12	4	0.0011165	0.0034931	0.370427	3	179	-0.403
SRP14	4	0.0011298	0.0035237	0.370427	1	180	0.1137
COBL	4	0.0011471	0.0035667	0.370427	3	181	-0.3135
DPM2	4	0.0011484	0.0035718	0.370427	3	182	-0.624
OR2AE1	4	0.0011527	0.0035843	0.370427	2	183	-0.258
DNAI1	4	0.0011604	0.0036071	0.370427	3	184	-0.499
HIST1H1C	4	0.0011644	0.0036179	0.370427	3	185	-0.555
RNF214	4	0.0011745	0.0036418	0.370427	3	186	-0.3335
TMEM229A	4	0.0011792	0.0036537	0.370427	3	187	-0.5645
ESYT2	4	0.0011805	0.0036568	0.370427	3	188	-0.3915
LFNG	4	0.0011851	0.0036682	0.370427	2	189	-0.2905
GCK	4	0.0011907	0.0036822	0.370427	3	190	-0.378
CBX3	4	0.0012179	0.0037511	0.375382	2	191	-0.501
UPP1	4	0.0012395	0.0038127	0.379564	3	192	-0.4035
RAB3GAP2	4	0.0012602	0.0038624	0.382522	3	193	-0.5755
MARVELD2	4	0.0012895	0.003935	0.387281	2	194	-0.182
BOD1L1	4	0.0012968	0.003951	0.387281	3	195	-0.2955
NCAPH2	4	0.0013097	0.0039831	0.388014	3	196	-0.6195
HRH3	4	0.001317	0.0040039	0.388014	3	197	-0.388
KNCN	4	0.001322	0.0040194	0.388014	3	198	-0.5105
TYW1	4	0.001387	0.0041867	0.402134	3	199	-0.28
RANBP1	4	0.0014171	0.0042691	0.407344	3	200	-0.5125
TBC1D8B	4	0.0014242	0.0042836	0.407344	3	201	-0.389
UQCRC2	4	0.0014348	0.0043136	0.408171	3	202	-0.4795
NCLN	4	0.0014891	0.0044447	0.413016	2	203	-0.415
SOX13	4	0.0015009	0.0044742	0.413016	3	204	-0.6205
ZNF177	4	0.0015062	0.0044892	0.413016	3	205	-0.429
MYADM	4	0.0015072	0.0044939	0.413016	3	206	-0.3895
KIAA0319	4	0.0015209	0.0045322	0.413016	2	207	-0.398
SAFB	4	0.0015271	0.0045498	0.413016	3	208	-0.4615
KCTD5	4	0.0015295	0.004556	0.413016	3	209	-0.359
MGRN1	4	0.0015351	0.0045685	0.413016	3	210	-0.3135
FAM78B	4	0.0015357	0.004569	0.413016	3	211	-0.3985
FOXQ1	4	0.0015399	0.0045809	0.413016	3	212	-0.337
DNPH1	4	0.0015698	0.004656	0.416929	3	213	-0.451
SRP68	4	0.0015755	0.0046679	0.416929	3	214	-0.627
GGNBP2	4	0.0015955	0.0047254	0.420101	2	215	-0.23675
DNAJC25-GNG10	4	0.0016157	0.0047834	0.42329	2	216	-0.29
CIITA	4	0.0016466	0.0048622	0.428275	3	217	-0.376
PRPF39	4	0.0016667	0.0049072	0.430262	2	218	-0.379
DPM1	4	0.0016897	0.0049653	0.431661	3	219	-0.5765
TBL1XR1	4	0.0016915	0.0049684	0.431661	3	220	-0.7845
DNTTIP2	4	0.001718	0.005043	0.436159	3	221	-0.454
FAM118A	4	0.0017484	0.0051264	0.437743	3	222	-0.479
CWC27	4	0.0017499	0.00513	0.437743	3	223	-0.6275
SALL4	4	0.0017598	0.00516	0.43835	3	224	-0.4875
CORIN	4	0.0017763	0.0052072	0.4396	2	225	-0.2092
ICMT	4	0.0017843	0.005231	0.4396	2	226	-0.469
AKAP9	4	0.0017923	0.005247	0.4396	2	227	-0.3765
DGCR14	4	0.0018021	0.0052667	0.4396	3	228	-0.5475
PDS5B	3	0.0018025	0.005088	0.437743	3	229	-0.361
MMD2	4	0.0018405	0.0053693	0.446212	2	230	-0.2735
ZNF737	4	0.001925	0.005605	0.463405	2	231	-0.38335
CENPW	4	0.0019333	0.0056247	0.463405	2	232	-0.7385
ZNF598	4	0.0019575	0.0056822	0.464736	3	233	-0.3035
AP2A1	4	0.0019611	0.0056899	0.464736	2	234	-0.411
EPOR	4	0.0019694	0.0057138	0.464736	2	235	-0.2805
IL19	4	0.0019991	0.005792	0.469101	3	236	-0.3045
ACTR5	4	0.0020199	0.0058541	0.470734	3	237	-0.5145
TRIM45	4	0.0020225	0.0058614	0.470734	3	238	-0.44
GPR171	4	0.0020397	0.0059122	0.472824	3	239	-0.4865
ZPBP	4	0.0020739	0.0060018	0.475718	2	240	-0.272
ACSL6	4	0.0020782	0.0060111	0.475718	3	241	-0.308
TMOD4	4	0.0020824	0.006023	0.475718	2	242	-0.1969998645
UBL4B	4	0.0021273	0.0061592	0.484476	3	243	-0.647
F8A3	4	0.0021612	0.006252	0.489754	3	244	-0.5755
RPL3L	4	0.0022208	0.0064141	0.500404	3	245	-0.3075
PDCD2	4	0.002237	0.0064566	0.500779	2	246	-0.5309
MARK1	4	0.0022443	0.0064731	0.500779	3	247	-0.3115
SLC35D3	4	0.0022505	0.0064975	0.500779	3	248	-0.3285
HNRNPF	4	0.0022697	0.0065462	0.501287	2	249	-0.43
SETD6	4	0.0022742	0.0065565	0.501287	3	250	-0.4385
PLCE1	4	0.0023295	0.0067125	0.511163	3	251	-0.4355
SRP72	4	0.0023571	0.0067798	0.514242	2	252	-0.4245
GPR148	4	0.0024135	0.0069243	0.520804	3	253	-0.255
FAM155B	4	0.0024189	0.0069419	0.520804	3	254	-0.374
BTBD16	4	0.00244	0.0069927	0.520804	2	255	-0.28585
TMC5	4	0.0024424	0.0069999	0.520804	2	256	-0.371
KMT2D	4	0.0024438	0.0070025	0.520804	3	257	-0.389
CDA	4	0.0024721	0.0070797	0.522677	3	258	-0.3735
CRIPAK	4	0.0024765	0.007087	0.522677	3	259	-0.289
ANKMY2	4	0.0024949	0.007139	0.522818	2	260	-0.215
JUNB	4	0.0025149	0.0071823	0.523978	3	261	-0.592
GNPTAB	4	0.0025368	0.0072382	0.525855	2	262	-0.238
GEN1	3	0.0025491	0.0071098	0.522677	3	263	-0.388
AKR1C4	4	0.0025505	0.0072703	0.525855	3	264	-0.296
NTHL1	4	0.0025589	0.0072905	0.525855	2	265	-0.31575
SLC38A9	4	0.0025863	0.0073532	0.528382	3	266	-0.2855
TRIL	4	0.0025998	0.0073952	0.529406	1	267	-0.00075
PHIP	4	0.0026134	0.0074351	0.529703	3	268	-0.5895
GSG2	4	0.0026194	0.0074548	0.529703	2	269	-0.43465
AKR1A1	4	0.0026418	0.0075154	0.530141	3	270	-0.2365
OCIAD2	4	0.002658	0.0075485	0.530449	2	271	-0.33
GTPBP1	4	0.0026936	0.0076386	0.530958	2	272	-0.3235
LGR6	4	0.0026947	0.0076412	0.530958	3	273	-0.4615
OLA1	4	0.0026968	0.00765	0.530958	3	274	-0.357
C1orf95	3	0.0026985	0.0075164	0.530141	2	275	-0.195
ATP1A4	4	0.0027294	0.007735	0.530958	2	276	-0.2915
PEX10	4	0.0027411	0.0077687	0.530958	3	277	-0.3975
SH3GL1	4	0.0027423	0.0077728	0.530958	3	278	-0.47
TAF4	4	0.0027425	0.0077754	0.530958	3	279	-0.423
PCDHB14	4	0.0027435	0.007778	0.530958	3	280	-0.3535
ZP3	4	0.0027705	0.0078557	0.534354	3	281	-0.323
BRAP	4	0.0028097	0.0079676	0.537739	3	282	-0.663
TMEM126A	4	0.002815	0.0079841	0.537739	2	283	-0.306
IFNGR2	4	0.0028178	0.0079898	0.537739	3	284	-0.4445
SETD7	4	0.0028476	0.0080756	0.541602	3	285	-0.3925
PAGR1	4	0.0028621	0.0081199	0.542668	2	286	-0.6695
AGO3	4	0.0029128	0.0082494	0.548456	3	287	-0.362
SPEF1	4	0.0029189	0.0082639	0.548456	3	288	-0.319
TTK	4	0.0029491	0.0083467	0.549105	3	289	-0.914
PPFIA4	4	0.0029593	0.0083726	0.549105	2	290	-0.2203
PABPN1L	4	0.0029671	0.0083897	0.549105	2	291	-0.296
COMMD8	4	0.0030002	0.0084814	0.549105	2	292	-0.275
SETD5	4	0.0030012	0.0084856	0.549105	3	293	-0.6205
PITPNB	3	0.0030059	0.0083644	0.549105	3	294	-0.51
RPS6KA3	4	0.0030099	0.0085058	0.549105	3	295	-0.2555
USP17L15	4	0.0030174	0.0085254	0.549105	2	296	-0.32645
UBR3	4	0.0030195	0.0085322	0.549105	1	297	-0.26
SEPSECS	4	0.0030345	0.0085622	0.549189	3	298	-0.714
DYNC1I1	4	0.003072	0.0086441	0.552585	2	299	-0.1239
SNTG2	4	0.0031002	0.0087259	0.555957	3	300	-0.4005
PAQR4	4	0.0031268	0.0087907	0.558222	3	301	-0.2385
DCP1A	4	0.0031677	0.0089082	0.563491	3	302	-0.5055
SMCHD1	4	0.0031769	0.0089326	0.563491	3	303	-0.256
MTMR3	4	0.003196	0.0089834	0.563794	3	304	-0.3845
IKBKAP	4	0.0032102	0.0090165	0.563794	3	305	-0.7095
MRPL9	4	0.0032293	0.0090626	0.563794	1	306	-0.03625
CYB5R1	4	0.0032336	0.0090699	0.563794	2	307	-0.294
ADGRG7	4	0.0032388	0.0090849	0.563794	3	308	-0.306
ENKD1	4	0.0032702	0.0091729	0.567416	3	309	-0.291
AEBP1	4	0.0033083	0.0092605	0.570984	3	310	-0.444
CRTC1	4	0.0033481	0.0093693	0.573988	2	311	-0.2555
PON1	3	0.0033703	0.0093309	0.573477	3	312	-0.243
OLFM3	4	0.0033975	0.0095014	0.58022	3	313	-0.3425
AHSA1	4	0.0034258	0.0095775	0.581791	3	314	-0.2765
AIP	4	0.0034388	0.0096075	0.581791	2	315	-0.37
C1orf194	4	0.0034644	0.0096728	0.581791	2	316	-0.277
EMC1	4	0.0034681	0.0096816	0.581791	2	317	-0.5745
ZBTB7B	4	0.0034746	0.0097003	0.581791	3	318	-0.32
KMT2C	4	0.0034901	0.009737	0.581791	2	319	-0.269
SNX10	4	0.0034915	0.0097402	0.581791	2	320	-0.322
SLC25A10	4	0.0035088	0.0097811	0.582206	3	321	-0.3585
CECR5	4	0.0035196	0.009808	0.582206	3	322	-0.277
NUPL1	4	0.0035641	0.0099116	0.586534	2	323	-0.637
PIH1D1	4	0.0036001	0.010006	0.590285	3	324	-0.5565
PTPN12	4	0.0036183	0.010059	0.591607	3	325	-0.339
PAN2	4	0.003666	0.010187	0.597264	3	326	-0.486
TMEM135	4	0.003684	0.01023	0.59795	2	327	-0.2365
HSPA8	4	0.0036954	0.010266	0.59827	2	328	-0.6887
ANKRD11	4	0.0037299	0.010352	0.601448	3	329	-0.4005
USP34	4	0.0037638	0.010436	0.602167	2	330	-0.21655
HIST1H1E	4	0.0037757	0.010471	0.602167	3	331	-0.3295
ZSCAN32	4	0.0037867	0.010497	0.602167	2	332	-0.17645
RBM38	4	0.0037887	0.0105	0.602167	3	333	-0.344
PHF23	4	0.0037973	0.010522	0.602167	3	334	-0.5815
NUPL2	4	0.0038466	0.010651	0.603218	3	335	-0.494
GNL3L	4	0.0038495	0.01066	0.603218	3	336	-0.439
NOL4L	4	0.0038585	0.01068	0.603218	2	337	-0.231
MTX3	4	0.0038597	0.010684	0.603218	2	338	-0.2145
LDB1	4	0.0038773	0.010726	0.603218	3	339	-0.5
DHX30	4	0.0038791	0.01073	0.603218	2	340	-0.23435
WWC1	4	0.0039101	0.010803	0.605543	2	341	-0.2345
GPBP1L1	4	0.0039374	0.010872	0.607623	2	342	-0.3198
FMOD	4	0.0039642	0.010935	0.609373	3	343	-0.407
PPIL1	4	0.0040299	0.011121	0.617574	3	344	-0.3395
SPRR2F	4	0.0040509	0.011178	0.617574	3	345	-0.4205
PQLC1	4	0.0040671	0.011221	0.617574	2	346	-0.2097
FAM177B	4	0.0040735	0.011238	0.617574	3	347	-0.4225
ABHD2	4	0.0040765	0.011244	0.617574	3	348	-0.3195
ZW10	4	0.0041206	0.011365	0.622415	1	349	-0.12055
NOB1	4	0.0041347	0.011405	0.622857	2	350	-0.471
IKZF1	4	0.0041848	0.011531	0.626505	3	351	-0.4025
PDIA4	4	0.0041878	0.011538	0.626505	3	352	-0.3215
RAF1	4	0.0042233	0.011634	0.62849	3	353	-0.3965
PES1	4	0.0042295	0.011652	0.62849	3	354	-0.363
CKMT2	4	0.0042372	0.011673	0.62849	3	355	-0.504
MPP6	4	0.0042543	0.011718	0.629144	3	356	-0.2555
RABGEF1	4	0.0042675	0.011753	0.629268	2	357	-0.24015
ADPRM	4	0.0043513	0.011962	0.638655	3	358	-0.341
SLC4A9	4	0.004402	0.012071	0.642643	3	359	-0.4845
OR5M8	4	0.0044187	0.012104	0.642643	2	360	-0.2099
HNRNPH1	4	0.0044518	0.012193	0.644669	2	361	-0.399
HEYL	4	0.0044683	0.012241	0.644669	2	362	-0.18472
MAGOH	4	0.004469	0.012243	0.644669	3	363	-0.3745
LNP1	4	0.0044874	0.012288	0.645264	1	364	0.09975
NCOA6	4	0.0045027	0.012327	0.645531	3	365	-0.307
PARN	4	0.0045307	0.012404	0.645834	3	366	-0.5185
ZNF451	4	0.0045684	0.012496	0.645834	2	367	-0.2554
MIR1-1HG	4	0.0045789	0.012529	0.645834	3	368	-0.313
STAR	4	0.0045809	0.012533	0.645834	2	369	-0.30305
INCENP	4	0.0045922	0.012558	0.645834	1	370	-0.1335
KMT2E	4	0.0045952	0.012566	0.645834	3	371	-0.3395
SUGCT	4	0.0045977	0.012572	0.645834	2	372	-0.293
LOC102724279	4	0.0046103	0.012603	0.645834	2	373	-0.16035
NLRP4	4	0.0046444	0.01269	0.648528	3	374	-0.43
C6orf7	4	0.0046652	0.012737	0.649134	2	375	-0.291
MYO5B	4	0.0046773	0.012769	0.649134	3	376	-0.261
SFXN1	4	0.0047038	0.012849	0.649864	3	377	-0.228
CDHR3	4	0.0047055	0.012852	0.649864	3	378	-0.327
MUC20	4	0.0047171	0.01289	0.650056	3	379	-0.3125
HN1	4	0.0047801	0.013063	0.656649	3	380	-0.4635
SNX6	4	0.0047905	0.013089	0.656649	3	381	-0.2395
NUAK2	4	0.0048541	0.013255	0.66091	2	382	-0.12125
PGK2	4	0.0048579	0.013263	0.66091	3	383	-0.3305
CDC7	4	0.0048664	0.013284	0.66091	3	384	-0.784
GSR	4	0.0048747	0.013312	0.66091	2	385	-0.17
RBMXL1	4	0.0049396	0.013469	0.660947	3	386	-0.3625
OR2T4	4	0.0049528	0.013502	0.660947	2	387	-0.181194
MS4A10	4	0.0049589	0.013517	0.660947	1	388	0.25135
BCORL1	4	0.0049703	0.013539	0.660947	2	389	-0.1826
PLIN2	4	0.0049876	0.013584	0.660947	3	390	-0.275
SLC35F2	4	0.0050031	0.013619	0.660947	3	391	-0.255
SETD1A	4	0.0050052	0.013627	0.660947	2	392	-0.36849923
ESPN	4	0.00501	0.013637	0.660947	3	393	-0.4385
CDKN2A	4	0.0050113	0.013639	0.660947	1	394	-0.1375
NUF2	4	0.0050184	0.013659	0.660947	2	395	-0.491
PCK1	4	0.0050655	0.013787	0.662722	3	396	-0.345
LGSN	4	0.0051108	0.013911	0.662722	2	397	-0.1623
NKX2-6	4	0.0051196	0.01393	0.662722	3	398	-0.2515
RFPL1	4	0.0051266	0.013944	0.662722	3	399	-0.461
AK4	4	0.0051353	0.013958	0.662722	3	400	-0.2635
DTX2	4	0.0051476	0.013984	0.662722	3	401	-0.302
KIAA0895	4	0.0051529	0.013997	0.662722	3	402	-0.222
VSTM2A	4	0.0051684	0.014035	0.662722	3	403	-0.3675
IMP3	4	0.0051687	0.014036	0.662722	3	404	-0.736
RPL27	4	0.0051773	0.014064	0.662722	2	405	-0.7505
KDM3B	4	0.0051818	0.014077	0.662722	3	406	-0.404
HDAC7	4	0.0051951	0.014112	0.662722	3	407	-0.4225
SHMT2	4	0.0052448	0.014252	0.667674	3	408	-0.346
TMEM165	4	0.0052966	0.014381	0.672069	3	409	-0.592
NUBPL	4	0.0053255	0.014457	0.67246	3	410	-0.511
MXD4	4	0.005327	0.01446	0.67246	3	411	-0.2935
EXOC7	4	0.0053778	0.014581	0.676452	2	412	-0.2531
CCDC185	4	0.0054302	0.014723	0.681406	2	413	-0.1415
HOXA13	4	0.0054555	0.014789	0.682774	3	414	-0.4285
EDF1	4	0.0054825	0.01485	0.683944	2	415	-0.35
OR2D3	4	0.0055069	0.01492	0.685513	2	416	-0.33075
RNF149	4	0.0055349	0.014991	0.686544	1	417	0.193
RAMP3	4	0.0055436	0.015014	0.686544	3	418	-0.372
RANBP3	4	0.0055786	0.015102	0.686614	3	419	-0.3775
MUC12	4	0.005586	0.015123	0.686614	3	420	-0.3505
FCRL1	4	0.0055873	0.015123	0.686614	2	421	-0.286
CCDC25	4	0.0056418	0.015265	0.689672	3	422	-0.3215
DHFRL1	4	0.0056498	0.015285	0.689672	2	423	-0.14595
CNOT10	4	0.0056548	0.015299	0.689672	3	424	-0.3675
ATP6V0A2	4	0.0056823	0.01537	0.691241	2	425	-0.202265
CDH18	4	0.0057449	0.015527	0.69666	3	426	-0.284
AFF3	4	0.0057732	0.015587	0.697407	3	427	-0.424
RHOXF2B	4	0.0057845	0.015616	0.697407	3	428	-0.598
KCND2	4	0.0058149	0.015703	0.698515	3	429	-0.284
XRN1	4	0.0058187	0.015714	0.698515	3	430	-0.4535
RUNX1	4	0.0058415	0.01577	0.699375	3	431	-0.353
FUBP1	4	0.0058745	0.01586	0.701744	2	432	-0.41
FKBP14	4	0.0059537	0.016069	0.709316	1	433	-0.06535
C1orf198	4	0.006006	0.016216	0.711162	1	434	-0.05355
NFIB	4	0.0060089	0.016225	0.711162	3	435	-0.2265
RAB5B	4	0.0060166	0.016242	0.711162	3	436	-0.4575
PGRMC2	4	0.0060583	0.016361	0.711162	1	437	-0.225
WDR83OS	4	0.0060634	0.016374	0.711162	3	438	-0.347
TEX33	4	0.0060794	0.016415	0.711162	2	439	-0.268
AGFG2	4	0.0060842	0.016425	0.711162	2	440	-0.14175
CYLD	4	0.0060868	0.01643	0.711162	3	441	-0.39
HIST2H2AA4	4	0.0061005	0.016463	0.711162	3	442	-0.8985
ZAR1	4	0.0061107	0.016482	0.711162	2	443	-0.3235
CCDC116	4	0.0061378	0.016549	0.712414	3	444	-0.3395
GOLGA6L10	4	0.006163	0.016617	0.713728	1	445	-0.1639998065
POLR1C	4	0.0062153	0.01674	0.714514	2	446	-0.49375
NDUFV1	4	0.0062228	0.016764	0.714514	3	447	-0.404
MC2R	4	0.0062407	0.016808	0.714514	3	448	-0.3525
PEX7	4	0.0062677	0.016878	0.714514	1	449	-0.153
GPM6A	4	0.0062765	0.016902	0.714514	3	450	-0.295
NDUFA1	4	0.0063022	0.016952	0.714514	2	451	-0.435
KIAA1804	4	0.0063169	0.01699	0.714514	2	452	-0.22515
TMEM241	4	0.0063316	0.017027	0.714514	2	453	-0.186495
CCZ1B	4	0.0063648	0.017121	0.714514	3	454	-0.367
GNE	4	0.0063723	0.017139	0.714514	2	455	-0.2485
KCTD9	4	0.006397	0.017201	0.714514	3	456	-0.255
EIF4EBP3	4	0.0064101	0.017238	0.714514	2	457	-0.3835
CARD10	4	0.0064246	0.017271	0.714514	1	458	-0.0056
DESI2	4	0.0064375	0.017308	0.714514	3	459	-0.4025
USP16	4	0.0064395	0.017313	0.714514	3	460	-0.3325
CYP3A7-CYP3A51P	4	0.0064397	0.017313	0.714514	2	461	-0.255
B3GNT2	4	0.0064595	0.017354	0.714514	2	462	-0.525
THOC6	4	0.006468	0.017371	0.714514	3	463	-0.3445
C1orf43	4	0.0064743	0.017385	0.714514	2	464	-0.429
GUF1	4	0.0064782	0.0174	0.714514	3	465	-0.2355
NDUFB10	4	0.0064924	0.017442	0.714514	3	466	-0.3175
GRXCR1	4	0.0064986	0.017457	0.714514	3	467	-0.292
SUB1	4	0.006521	0.017511	0.715188	3	468	-0.3065
INPP5F	4	0.0065497	0.017589	0.71553	3	469	-0.272
RANBP10	4	0.00656	0.017616	0.71553	3	470	-0.29
DLX5	4	0.0065661	0.017632	0.71553	3	471	-0.3025
ZNF330	4	0.0066339	0.017801	0.719371	2	472	-0.289
RPL26L1	4	0.0066342	0.017802	0.719371	3	473	-0.4985
PEG10	4	0.0066862	0.017943	0.722242	1	474	-0.06486
POM121	4	0.0066922	0.017962	0.722242	3	475	-0.257
NPY	4	0.0067006	0.017986	0.722242	3	476	-0.3115
EFCAB7	4	0.0067235	0.018051	0.723343	3	477	-0.21
EXOC2	4	0.0067644	0.018163	0.726283	2	478	-0.24755
PHB	4	0.0067908	0.018226	0.727197	2	479	-0.8865
CASC5	4	0.0068051	0.018262	0.727197	3	480	-0.4505
MAP1A	4	0.0068431	0.01835	0.729027	1	481	0.13475
SLC1A4	4	0.0068557	0.018384	0.729027	3	482	-0.452
MACROD2	4	0.0068747	0.018424	0.729096	3	483	-0.2125
VPS9D1	4	0.0069475	0.018597	0.732928	2	484	-0.35
AGO2	4	0.0069477	0.018597	0.732928	2	485	-0.1835
NAPG	4	0.007	0.018755	0.735279	1	486	0.584
PGBD5	4	0.0070153	0.018787	0.735279	3	487	-0.2645
WNT9A	4	0.0070432	0.018849	0.735279	3	488	-0.2055
SMCR8	4	0.0070523	0.018876	0.735279	1	489	-0.0319
DIS3L2	4	0.0070605	0.0189	0.735279	3	490	-0.4265
ADORA1	4	0.0070657	0.018912	0.735279	2	491	-0.208499928
KDM4E	4	0.0070709	0.018926	0.735279	2	492	-0.41
APOPT1	4	0.0070906	0.018973	0.735595	3	493	-0.3855
ST3GAL2	4	0.0071569	0.019161	0.73943	2	494	-0.2669
TMEM130	4	0.0071599	0.01917	0.73943	3	495	-0.256
INPPL1	4	0.0071692	0.019188	0.73943	2	496	-0.398
INAFM1	4	0.0072161	0.019293	0.740517	2	497	-0.328
FOXS1	4	0.0072165	0.019294	0.740517	3	498	-0.2785
ANKRD18B	4	0.0072997	0.019496	0.741933	2	499	-0.2705
TMEM31	4	0.0073138	0.019529	0.741933	2	500	-0.1114
MYBL2	4	0.007366	0.019646	0.741933	1	501	-0.32
U2SURP	4	0.0073703	0.019661	0.741933	3	502	-0.576
HECTD3	4	0.0073785	0.019682	0.741933	2	503	-0.2235
ZKSCAN2	4	0.0074013	0.019739	0.741933	3	504	-0.323
CENPBD1	4	0.007408	0.019757	0.741933	3	505	-0.397
TNRC18	4	0.0074154	0.019776	0.741933	2	506	-0.3095
EFEMP1	4	0.0074365	0.01983	0.741933	2	507	-0.0645
REN	4	0.0074418	0.019841	0.741933	2	508	-0.187995
DNAJA1	4	0.0074436	0.019847	0.741933	3	509	-0.3765
POR	4	0.0074683	0.019908	0.741933	2	510	-0.2185
SLC25A20	4	0.0074789	0.019932	0.741933	2	511	-0.249845
DUSP12	4	0.0074895	0.019957	0.741933	2	512	-0.428
VPS37D	4	0.0075218	0.020038	0.741933	3	513	-0.4585
SIRPG	4	0.0075229	0.020039	0.741933	1	514	-0.128
SLC30A1	4	0.0075352	0.020068	0.741933	3	515	-0.5085
SHISA3	4	0.0075554	0.020124	0.742584	3	516	-0.3755
ARPC3	4	0.0076173	0.020268	0.746456	2	517	-0.2959
CLDN23	4	0.0076547	0.020347	0.747896	2	518	-0.235
ABHD11	4	0.0076797	0.020402	0.748301	3	519	-0.266
CEP250	4	0.0077031	0.02046	0.748301	2	520	-0.21525
TMEM63A	4	0.0077084	0.020475	0.748301	2	521	-0.2246
RPS21	4	0.007732	0.020538	0.748864	2	522	-0.656
CST7	4	0.0077677	0.020634	0.748864	2	523	-0.2915
CCDC183	4	0.0077842	0.02067	0.748864	1	524	-0.05795
ASRGL1	4	0.0078099	0.020735	0.748864	3	525	-0.4045
NAP1L3	4	0.0078163	0.020755	0.748864	2	526	-0.282
HMHA1	4	0.0078329	0.020795	0.748864	3	527	-0.236
SUCO	4	0.0078352	0.020802	0.748864	3	528	-0.5135
ANKH	4	0.0078365	0.020806	0.748864	1	529	0.000699999999999999
BUB1B	4	0.0078651	0.020873	0.748864	2	530	-0.577
NPTN	4	0.0078814	0.020915	0.748864	2	531	0.0885
PAX8	4	0.0078888	0.020938	0.748864	1	532	0.00832
TMEM184B	4	0.0079021	0.020973	0.748864	3	533	-0.346
GSS	4	0.0079114	0.021	0.748864	3	534	-0.672
ATP8A1	4	0.0079467	0.021075	0.748909	2	535	-0.22275
TNRC6B	4	0.0079578	0.021104	0.748909	3	536	-0.4445
KDR	4	0.0079787	0.021156	0.748909	3	537	-0.3015
RTFDC1	4	0.0079795	0.021158	0.748909	2	538	-0.6151
PRSS57	4	0.008002	0.021218	0.749342	3	539	-0.3295
HNRNPU	4	0.0080123	0.021248	0.749342	2	540	-0.5631
FMO4	4	0.0080455	0.021334	0.750971	1	541	-0.0464
STX7	4	0.0081003	0.021483	0.753659	3	542	-0.263
XPNPEP2	4	0.0081168	0.02153	0.753659	3	543	-0.2295
ZNF845	4	0.0081222	0.021541	0.753659	2	544	-0.2985
FAM83D	4	0.0081427	0.021591	0.753659	3	545	-0.216
PKMYT1	4	0.00815	0.021607	0.753659	1	546	0.029
API5	4	0.0081774	0.021671	0.754504	2	547	-0.295
GPR132	4	0.0081947	0.021712	0.754554	3	548	-0.474
CHP2	4	0.0082184	0.021762	0.75491	3	549	-0.4
PRLHR	4	0.0082493	0.021844	0.756376	3	550	-0.331
SLC35G3	4	0.0082683	0.021894	0.756577	3	551	-0.402
ITIH3	4	0.0082828	0.021929	0.756577	2	552	-0.1698
SPATA31A5	4	0.0083068	0.021988	0.757265	2	553	-0.427
CD84	4	0.008359	0.02212	0.759257	1	554	-0.13155
ELMO1	4	0.0083615	0.022125	0.759257	3	555	-0.311
IGFBP1	4	0.0083783	0.022165	0.759262	3	556	-0.2245
SLC17A3	4	0.0084336	0.022294	0.760963	2	557	-0.361
MGC50722	4	0.0084617	0.022369	0.760963	2	558	-0.3
OSGIN1	4	0.0084635	0.022374	0.760963	2	559	-0.449
KIAA1715	4	0.0084842	0.022427	0.760963	2	560	-0.15385
GCLC	4	0.0084893	0.022441	0.760963	3	561	-0.5425
AHSG	4	0.0084941	0.022454	0.760963	3	562	-0.5375
ARAF	4	0.0085157	0.022505	0.761351	1	563	-0.1365
TNNC2	4	0.0085354	0.022553	0.761633	3	564	-0.2235
CSF1R	4	0.008568	0.022643	0.761969	1	565	-0.1539
UBR5	4	0.0085841	0.022686	0.761969	3	566	-0.5565
EPG5	4	0.0085971	0.02272	0.761969	2	567	-0.2265
CAMKMT	4	0.0086084	0.022747	0.761969	2	568	-0.222
FRMD6	4	0.0086158	0.022763	0.761969	3	569	-0.2005
LSM14B	4	0.0086538	0.022866	0.763368	2	570	-0.19535
EHD2	4	0.0086708	0.022917	0.763368	2	571	-0.3135
CTSS	4	0.0086724	0.022924	0.763368	2	572	-0.2435
SMG5	4	0.0087391	0.023086	0.767096	2	573	-0.4365
ANKRD22	4	0.0087608	0.02314	0.767096	3	574	-0.3075
GABRB1	4	0.0087769	0.02319	0.767096	2	575	-0.14165
MBLAC1	4	0.0087906	0.023219	0.767096	2	576	-0.1603
MDH2	4	0.0088004	0.023247	0.767096	3	577	-0.3175
C4orf27	4	0.0088128	0.023277	0.767096	3	578	-0.251
USP49	4	0.0088949	0.023483	0.770762	3	579	-0.397
MMP10	4	0.0088996	0.023495	0.770762	2	580	-0.0235
ORC6	4	0.0089336	0.023578	0.770762	2	581	-0.46
TAAR8	4	0.0089399	0.02359	0.770762	2	582	-0.359
PRR15	4	0.0089399	0.02359	0.770762	3	583	-0.4345
TBC1D8	4	0.0089951	0.023738	0.77404	3	584	-0.324
SLC16A1	4	0.0090092	0.023771	0.77404	2	585	-0.1225
GABBR1	4	0.0090498	0.02388	0.775536	3	586	-0.3545
GALE	3	0.009061	0.019496	0.741933	2	587	-0.879
ZBTB26	4	0.009073	0.023937	0.775536	2	588	-0.3715
DOLPP1	4	0.0090846	0.023967	0.775536	2	589	-0.511
C22orf42	4	0.0090902	0.023979	0.775536	1	590	-0.28805
BCL9L	4	0.0091312	0.024081	0.777094	2	591	-0.339
SLC6A3	3	0.0091394	0.019619	0.741933	1	592	0.0734
ALG3	4	0.0091424	0.024109	0.777094	2	593	-0.25905
HDAC1	4	0.0091946	0.024244	0.777713	2	594	-0.1733
NME8	4	0.0091954	0.024245	0.777713	2	595	-0.2455
MATN4	4	0.0092027	0.024269	0.777713	3	596	-0.441
TMEM81	4	0.0092461	0.024378	0.777713	3	597	-0.2855
PPP1R13L	4	0.0092487	0.024384	0.777713	3	598	-0.3205
LRRD1	4	0.0092773	0.024451	0.777713	2	599	-0.197
C18orf25	4	0.009282	0.024462	0.777713	3	600	-0.4005
SORT1	4	0.0092845	0.024469	0.777713	3	601	-0.2655
SYCE3	4	0.0092922	0.024494	0.777713	3	602	-0.303
PCDHB5	4	0.0093617	0.024669	0.779394	3	603	-0.4445
PPM1A	4	0.0093926	0.024752	0.779394	3	604	-0.374
SHISA4	4	0.0093951	0.024757	0.779394	2	605	-0.2715
RBBP7	4	0.0094263	0.02483	0.779394	3	606	-0.3405
FOXD4L1	4	0.0094483	0.024889	0.779394	2	607	-0.094
IMMT	4	0.0095016	0.025021	0.779394	2	608	-0.31
MAP2K7	4	0.0095041	0.025027	0.779394	3	609	-0.3075
ST6GALNAC5	4	0.0095079	0.025035	0.779394	1	610	-0.012
FRMPD4	4	0.0095135	0.025052	0.779394	2	611	-0.2132
NDUFAF5	4	0.0095194	0.025064	0.779394	2	612	-0.271
INADL	4	0.0095313	0.025094	0.779394	2	613	-0.2435
POLR2L	4	0.0095537	0.025155	0.779394	3	614	-0.6565
DDR1	4	0.0095551	0.025159	0.779394	2	615	-0.2346
MON2	4	0.0096685	0.025432	0.786576	2	616	-0.33
POLR2J3	4	0.0096954	0.025503	0.786906	3	617	-0.3525
CALCR	4	0.0097139	0.025559	0.786906	3	618	-0.1895
SEC61B	4	0.0097166	0.025566	0.786906	1	619	0.203
TMEM170A	4	0.0097826	0.025716	0.788874	3	620	-0.2115
KCNJ18	4	0.0098039	0.025766	0.788874	3	621	-0.193
ANKRD45	4	0.009821	0.025811	0.788874	2	622	-0.237
ZWILCH	4	0.0098488	0.025873	0.788874	2	623	-0.449
OR4F17	4	0.0098548	0.025886	0.788874	2	624	-0.22
USP17L12	4	0.0098732	0.025934	0.788874	1	625	-0.09
HELZ2	4	0.009879	0.025946	0.788874	2	626	-0.2825
GLTSCR1L	4	0.0098971	0.025989	0.788874	2	627	-0.105
MTHFD1L	4	0.0099334	0.026073	0.788874	2	628	-0.2157
SLC26A5	4	0.0099698	0.026159	0.788874	2	629	-0.124
PLA2G6	4	0.0099776	0.026182	0.788874	1	630	-0.1965
COL9A3	4	0.0099855	0.026207	0.788874	3	631	-0.176
HNRNPH2	4	0.010018	0.026288	0.788874	2	632	-0.22115
WIPF3	4	0.01003	0.026317	0.788874	2	633	-0.15785
LYSMD3	4	0.010042	0.026344	0.788874	3	634	-0.3715
RHOBTB3	4	0.010064	0.026402	0.788874	3	635	-0.212
OR1I1	4	0.01008	0.026436	0.788874	3	636	-0.3595
HTRA4	4	0.010082	0.026441	0.788874	3	637	-0.2425
BAG6	4	0.010099	0.02648	0.788874	3	638	-0.304
RNF220	4	0.010101	0.026488	0.788874	3	639	-0.33
UPRT	4	0.010116	0.026528	0.788874	2	640	-0.148
TH	4	0.010134	0.026574	0.788874	1	641	0.1675
CCL24	4	0.010137	0.026579	0.788874	3	642	-0.265
TMEM70	4	0.010153	0.026624	0.788986	2	643	-0.16127
CST1	4	0.010186	0.026712	0.790355	2	644	-0.256
PEX26	4	0.010218	0.026787	0.791368	3	645	-0.3245
VGLL4	4	0.010291	0.026967	0.79417	1	646	0.011
KLF5	4	0.010292	0.026971	0.79417	3	647	-0.2485
HKDC1	4	0.010317	0.027038	0.79417	3	648	-0.273
HSF2	4	0.010322	0.027048	0.79417	3	649	-0.3205
ERMN	4	0.010343	0.027104	0.794577	1	650	0.0404
NDUFA4	4	0.010374	0.027196	0.796044	3	651	-0.406
ZFP64	4	0.010461	0.027431	0.801541	2	652	-0.14865
LIN28B	4	0.010499	0.027526	0.801541	2	653	-0.2085
P3H2	4	0.010517	0.027579	0.801541	2	654	-0.27345
NSA2	4	0.010529	0.027615	0.801541	2	655	-0.7425
PGAP2	4	0.010542	0.027647	0.801541	2	656	-0.035
NR1H2	4	0.010586	0.02775	0.801541	2	657	-0.5375
DUOXA1	4	0.010592	0.027761	0.801541	2	658	-0.14785
ENAH	4	0.010602	0.027779	0.801541	3	659	-0.3185
RPS8	4	0.010604	0.027781	0.801541	1	660	-0.397
SLC17A1	4	0.010617	0.027816	0.801541	2	661	-0.286
C5orf22	4	0.010636	0.027866	0.801541	2	662	-0.22
GBAS	4	0.010708	0.028022	0.801541	1	663	-0.217
SSC4D	4	0.010755	0.028139	0.801541	2	664	-0.1305
ZNF479	4	0.01076	0.028151	0.801541	1	665	-0.2135
TNNC1	4	0.010809	0.028281	0.801541	3	666	-0.404
DNTTIP1	4	0.010812	0.028285	0.801541	2	667	-0.2705
WDR64	4	0.010812	0.028285	0.801541	3	668	-0.2285
ZNF608	4	0.010841	0.028341	0.801541	3	669	-0.336
C1orf137	4	0.010863	0.028403	0.801541	3	670	-0.5705
ACAP3	4	0.010864	0.028404	0.801541	2	671	-0.16635
MYPN	4	0.010875	0.028432	0.801541	3	672	-0.3025
LYPD2	4	0.010909	0.028516	0.801541	3	673	-0.3225
ASH1L	4	0.010914	0.028525	0.801541	3	674	-0.286
KDM5B	4	0.01092	0.028547	0.801541	3	675	-0.326
ZNF362	4	0.010932	0.028569	0.801541	2	676	-0.1679
PSMD2	4	0.01096	0.028627	0.801541	3	677	-0.469
CNOT8	4	0.010963	0.028635	0.801541	3	678	-0.3235
TMEM54	4	0.010969	0.028649	0.801541	2	679	-0.19555
PPIH	4	0.010977	0.028671	0.801541	3	680	-0.6855
KIAA1522	4	0.010997	0.028726	0.801541	3	681	-0.291
DCUN1D4	4	0.011011	0.028765	0.801541	3	682	-0.36
IL18RAP	4	0.011014	0.028771	0.801541	3	683	-0.526
CNOT7	4	0.011021	0.028789	0.801541	2	684	-0.4855
TMEM178B	4	0.011028	0.028809	0.801541	3	685	-0.202
MTNR1A	4	0.011073	0.028913	0.802577	1	686	0.10945
RAC3	4	0.011078	0.02893	0.802577	2	687	-0.1986
ARL2BP	4	0.011125	0.029058	0.804781	2	688	-0.29
DIRC2	4	0.011142	0.029094	0.804781	2	689	-0.1944
SCARA3	4	0.011172	0.029168	0.804873	3	690	-0.1825
KRTAP19-3	4	0.011229	0.029308	0.807195	1	691	-0.1048
USP15	4	0.011257	0.029374	0.807842	2	692	-0.3455
ZNF208	4	0.011281	0.029434	0.808181	1	693	-0.0155
LOC100505549	4	0.011296	0.029471	0.808181	2	694	-0.14565
PILRB	4	0.011334	0.029553	0.809278	1	695	0.0946
SYNE4	4	0.011386	0.029693	0.811833	1	696	-0.04665
TRIM42	4	0.011442	0.029836	0.811833	3	697	-0.4075
PDE6B	4	0.011472	0.029901	0.811833	3	698	-0.2485
CNOT1	4	0.01149	0.02994	0.811833	1	699	-0.0691
TTC38	4	0.011504	0.029969	0.811833	3	700	-0.2965
PCYT2	4	0.011507	0.029978	0.811833	3	701	-0.2775
PTBP1	4	0.011536	0.030054	0.811833	3	702	-0.3685
CERS1	4	0.011542	0.03007	0.811833	2	703	-0.203
CSNK1G2	4	0.011554	0.030094	0.811833	2	704	-0.21055
THAP11	4	0.011578	0.030152	0.811833	3	705	-0.398
SH2D1B	4	0.011592	0.030195	0.811833	3	706	-0.2485
PPP2R5C	4	0.011594	0.030202	0.811833	2	707	-0.3865
ELOVL5	4	0.011594	0.030203	0.811833	1	708	-0.02665
CLOCK	4	0.011633	0.030293	0.811833	2	709	-0.17245
HIST3H2A	4	0.011639	0.030309	0.811833	2	710	-0.1509
RPUSD1	4	0.011646	0.030326	0.811833	1	711	-0.266
PTGER4	4	0.011698	0.030465	0.813541	1	712	-0.17675
ZNF675	4	0.011711	0.030494	0.813541	2	713	-0.3995
CELF5	4	0.011738	0.030565	0.813541	3	714	-0.2935
SETD1B	4	0.01175	0.030602	0.813541	2	715	-0.1145
SKIV2L	4	0.01175	0.030602	0.813541	1	716	-0.13995
RALA	4	0.011788	0.030697	0.814607	3	717	-0.3555
CD244	4	0.011803	0.030728	0.814607	1	718	0.14175
TRIM4	4	0.011855	0.03086	0.816976	1	719	-0.0659
HPRT1	4	0.011932	0.031053	0.819929	3	720	-0.2045
PTRHD1	4	0.011935	0.031057	0.819929	2	721	-0.2311
PDHB	4	0.011959	0.031122	0.820492	1	722	-0.2225
LGALS1	4	0.012026	0.031288	0.822464	3	723	-0.2555
DCLRE1A	4	0.012029	0.031294	0.822464	3	724	-0.2675
SEPP1	4	0.012094	0.031458	0.822464	2	725	-0.3115
MCF2L	4	0.012098	0.031472	0.822464	3	726	-0.4075
ASF1A	4	0.012105	0.031486	0.822464	3	727	-0.3695
DCSTAMP	4	0.012115	0.031505	0.822464	1	728	-0.04815
KCTD10	4	0.012123	0.031525	0.822464	3	729	-0.27
CCIN	4	0.012129	0.031541	0.822464	3	730	-0.3395
KRT4	3	0.01215	0.024819	0.779394	2	731	-0.353
PCGF6	4	0.012193	0.031702	0.825474	3	732	-0.237
NR2E3	4	0.012269	0.031892	0.825474	3	733	-0.3245
MAFG	4	0.012321	0.032011	0.825474	2	734	-0.2705
SPRR2D	4	0.012324	0.032019	0.825474	1	735	-0.010265
MTF2	4	0.012337	0.032058	0.825474	3	736	-0.2775
ZDHHC4	4	0.012341	0.032065	0.825474	2	737	-0.26
NOX5	4	0.012371	0.032134	0.825474	3	738	-0.3465
CYP3A43	4	0.012374	0.032139	0.825474	3	739	-0.234
IL18R1	4	0.012377	0.032145	0.825474	3	740	-0.25
MKL1	4	0.012383	0.032157	0.825474	3	741	-0.276
RSBN1L	4	0.012398	0.032191	0.825474	3	742	-0.2515
GNAS	4	0.012414	0.032231	0.825474	3	743	-0.355
TBX20	4	0.012426	0.032259	0.825474	3	744	-0.2635
PPARG	4	0.012428	0.032261	0.825474	1	745	-0.314
CMSS1	4	0.012468	0.032353	0.825759	2	746	-0.22605
FBXW7	4	0.012495	0.032417	0.825759	2	747	-0.25425
MACC1	4	0.012532	0.032468	0.825759	2	748	-0.2135
AP4S1	4	0.01257	0.032529	0.825759	2	749	-0.169
SHISA9	4	0.012584	0.032549	0.825759	1	750	-0.2495
TUBB2A	4	0.01259	0.03256	0.825759	2	751	-0.14785
TAF1L	4	0.01261	0.032598	0.825759	2	752	-0.409
IFT140	4	0.012637	0.032643	0.825759	2	753	-0.18695
PLXDC1	4	0.012688	0.032729	0.825759	1	754	-0.0623
DNAJC27	4	0.012692	0.032734	0.825759	2	755	-0.0645
TFR2	4	0.01274	0.032807	0.825759	1	756	-0.0298
ZNF493	4	0.01276	0.032844	0.825759	2	757	-0.353
VASN	4	0.012792	0.032891	0.825759	1	758	0.0035
SFRP5	4	0.012801	0.032908	0.825759	2	759	-0.066
TXNIP	4	0.012814	0.032929	0.825759	2	760	-0.2457
PAN3	4	0.012844	0.032977	0.825759	1	761	-0.00288
C3orf79	4	0.012903	0.033072	0.825759	2	762	-0.1571
C12orf49	4	0.012917	0.03309	0.825759	2	763	-0.2835
RPL35A	4	0.012931	0.033113	0.825759	2	764	-0.4795
EMC2	4	0.012965	0.033169	0.825759	2	765	-0.605
IL15RA	4	0.012972	0.033179	0.825759	2	766	-0.14275
ATP10D	4	0.013053	0.0333	0.827555	1	767	-0.0607
MAFA	4	0.013082	0.033345	0.827555	2	768	-0.33745
ATRN	4	0.013105	0.033381	0.827555	1	769	-0.0851
LCE1C	2	0.01327	0.024953	0.779394	1	770	0.0365
OSBPL3	4	0.013313	0.033711	0.833026	1	771	-0.196
CAMK1G	4	0.013331	0.033734	0.833026	2	772	-0.286
NACAD	4	0.013365	0.033784	0.833026	1	773	-0.14075
AKR7A3	4	0.013401	0.033851	0.833026	2	774	-0.158499924
HTR1A	4	0.013417	0.033875	0.833026	1	775	0.0397
RALY	4	0.013436	0.033907	0.833026	2	776	-0.452
KIFC1	4	0.013469	0.033951	0.833049	2	777	-0.2885
MBD1	4	0.013611	0.034182	0.836224	2	778	-0.2675
UBE2H	4	0.013625	0.03421	0.836224	1	779	-0.4665
EPHX4	4	0.013653	0.034252	0.836224	2	780	-0.2755
SPC25	4	0.013677	0.034291	0.836224	1	781	-0.454
TXNRD1	4	0.013709	0.034348	0.836224	2	782	-0.18199892
ANKRD65	4	0.013729	0.034373	0.836224	1	783	-0.1708
SMIM14	4	0.013737	0.034387	0.836224	2	784	-0.2905
TRIM58	4	0.013822	0.034524	0.836671	2	785	-0.3395
KCNA1	4	0.013833	0.034545	0.836671	1	786	-0.2162
TMPRSS6	4	0.013836	0.034551	0.836671	2	787	-0.3655
THEM5	4	0.013857	0.034584	0.836671	2	788	-0.1761
SYTL1	4	0.013886	0.034624	0.836671	2	789	-0.2825
GAGE2D	4	0.013935	0.034706	0.837463	2	790	-0.372
BMF	4	0.013978	0.034776	0.837463	2	791	-0.2495
BCO2	4	0.013985	0.034788	0.837463	2	792	-0.277
STAG2	4	0.014021	0.034843	0.837717	2	793	-0.3845
MAPK10	4	0.01407	0.034929	0.83873	2	794	-0.2305
TBC1D23	4	0.014099	0.034973	0.838746	2	795	-0.3029
IL2	4	0.014142	0.035041	0.839307	2	796	-0.29
NREP	4	0.014197	0.035125	0.839449	1	797	0.2505
TAOK2	4	0.014206	0.035134	0.839449	2	798	-0.2295
MARC2	4	0.014242	0.035202	0.840008	2	799	-0.162
C1D	4	0.014314	0.035313	0.841603	2	800	-0.319
MYL6	4	0.014353	0.03538	0.84175	2	801	-0.1515
2005-09-01	4	0.014378	0.035427	0.84175	2	802	-0.3495
TSNAX	4	0.014393	0.035451	0.84175	2	803	-0.35
LPCAT1	4	0.014457	0.035552	0.843114	1	804	-0.15315
DEFB129	4	0.014487	0.035602	0.843247	2	805	-0.292
FCHO2	4	0.014537	0.035691	0.844185	2	806	-0.44
AKAP8	4	0.014561	0.03573	0.844185	2	807	-0.185
NDUFS2	4	0.014665	0.0359	0.847152	1	808	0.3245
FAM109B	3	0.014692	0.029182	0.804873	2	809	-0.25
SLC26A9	4	0.014726	0.035994	0.848317	2	810	-0.3455
DCHS2	4	0.014769	0.036058	0.848685	1	811	0.0013
TRIM7	4	0.014799	0.03611	0.848685	2	812	-0.2895
SHANK1	4	0.014821	0.036149	0.848685	1	813	-0.324
MTR	4	0.014843	0.036187	0.848685	2	814	-0.2685
LYSMD2	4	0.014873	0.036253	0.849198	1	815	0.17285
NDUFB7	4	0.014925	0.036342	0.850243	2	816	-0.442
LCK	4	0.014977	0.036428	0.851213	1	817	-0.08125
FBXL18	4	0.015114	0.03664	0.855118	2	818	-0.314
ARHGAP35	4	0.015185	0.036738	0.855442	1	819	0.1075
GTSCR1	4	0.01521	0.036776	0.855442	2	820	-0.23979
ADAM30	4	0.015218	0.036788	0.855442	2	821	-0.357
LMO4	4	0.015262	0.03685	0.855697	2	822	-0.2215
MIIP	4	0.015284	0.036889	0.855697	2	823	-0.312
LAMC3	4	0.015393	0.037064	0.858716	1	824	-0.05665
ACTRT2	4	0.015445	0.037153	0.85877	1	825	-0.1635
ADAM7	4	0.015448	0.037156	0.85877	2	826	-0.0955
XKR5	4	0.015601	0.037402	0.863363	1	827	-0.0873
SHD	4	0.015627	0.037445	0.863363	2	828	-0.1947
PTTG2	4	0.015702	0.037575	0.864343	2	829	-0.33105
RNPEP	4	0.015705	0.03758	0.864343	2	830	-0.109
TAF8	4	0.015732	0.037623	0.864343	2	831	-0.4185
ING3	4	0.015861	0.037825	0.867941	1	832	-0.733
CBX8	4	0.015913	0.037907	0.868776	1	833	-0.028855
EARS2	4	0.015973	0.038019	0.869992	2	834	-0.40785
S100Z	4	0.016016	0.038087	0.869992	1	835	0.1195
MPST	4	0.016026	0.038097	0.869992	2	836	-0.3545
ALG5	4	0.016068	0.038176	0.870761	2	837	-0.30035
HPGD	4	0.016172	0.03834	0.872398	1	838	-0.0427
TMEM244	4	0.016193	0.03837	0.872398	2	839	-0.223
GCGR	4	0.016224	0.038423	0.872398	2	840	-0.27
APEX2	4	0.016231	0.03843	0.872398	2	841	-0.004
CHPF	4	0.016269	0.038499	0.872914	2	842	-0.289
FHL2	4	0.016322	0.038583	0.873051	2	843	-0.2405
SH3RF3	4	0.016328	0.038596	0.873051	1	844	0.0198
PGBD2	4	0.016484	0.038843	0.877601	1	845	-0.08255
UPK2	4	0.016552	0.038951	0.878803	2	846	-0.301
DFNB59	4	0.016588	0.039004	0.878803	1	847	-0.15735
TBCE	4	0.016606	0.039034	0.878803	2	848	-0.5405
C1QL2	4	0.01666	0.039115	0.879586	2	849	-0.442
GNAT3	4	0.016691	0.039167	0.879705	1	850	-0.1615
LRRC8C	4	0.01676	0.039273	0.880374	2	851	-0.1
GAB4	4	0.016795	0.039325	0.880374	1	852	0.08825
ABCG1	4	0.016837	0.03939	0.880374	2	853	-0.338
UHRF1	4	0.016868	0.039431	0.880374	2	854	-0.37055
PRSS33	4	0.016876	0.039446	0.880374	2	855	-0.2605
PROX1	4	0.016899	0.039473	0.880374	1	856	-0.2205
METTL5	4	0.016951	0.039565	0.881402	1	857	0.088
C18orf32	4	0.017003	0.039644	0.881918	1	858	-0.256
B4GALT7	4	0.017031	0.039693	0.881918	2	859	-0.2745
ST6GALNAC3	4	0.017055	0.039726	0.881918	2	860	-0.212
KIF3B	4	0.017164	0.039904	0.883804	2	861	-0.365
BIVM	4	0.01718	0.039929	0.883804	2	862	-0.1235
CDC123	4	0.017211	0.039973	0.883804	1	863	-0.0865
CCRL2	3	0.017229	0.033506	0.829573	1	864	-0.0486
IL2RB	4	0.017262	0.040057	0.883804	2	865	-0.20927
GLI3	4	0.017297	0.040114	0.883804	2	866	-0.2998
NDFIP1	4	0.017314	0.040142	0.883804	2	867	-0.3345
CCM2	4	0.017336	0.040184	0.883804	2	868	-0.2505
PRL	4	0.017352	0.040208	0.883804	2	869	-0.1165
OR6C2	4	0.017366	0.040228	0.883804	2	870	-0.15575
KCNG3	4	0.01747	0.040382	0.883804	1	871	0.198
MEFV	4	0.017478	0.040396	0.883804	2	872	-0.4375
PRR29	4	0.017502	0.040434	0.883804	2	873	-0.1385
CLN8	4	0.017557	0.04051	0.883804	2	874	-0.221
PPP1R42	4	0.017596	0.040571	0.883804	2	875	-0.11645
MUT	4	0.017626	0.040608	0.883804	1	876	-0.05145
FRYL	4	0.017628	0.04061	0.883804	2	877	-0.202
CBLC	4	0.017636	0.040622	0.883804	2	878	-0.113
ATP6V0E1	4	0.017675	0.040678	0.883804	2	879	-0.2355
CRB2	4	0.017683	0.04069	0.883804	2	880	-0.1158
C6orf136	4	0.017747	0.040786	0.884169	2	881	-0.2229
SMIM7	4	0.017755	0.040799	0.884169	2	882	-0.0945
CD300LF	4	0.017786	0.040848	0.884192	2	883	-0.13145
ANTXRL	4	0.017833	0.040919	0.884192	2	884	-0.1725
KREMEN1	4	0.01785	0.040939	0.884192	2	885	-0.367
METTL3	4	0.017885	0.040991	0.884312	2	886	-0.295
FAM187B	4	0.017938	0.041075	0.885134	2	887	-0.26675
NEDD4L	4	0.017989	0.041157	0.885888	2	888	-0.093
BCL7B	4	0.018073	0.041291	0.886161	2	889	-0.204
PCOLCE	4	0.018092	0.041319	0.886161	1	890	-0.10925
HCN3	4	0.018144	0.0414	0.886161	2	891	-0.2381
MSX2	4	0.018161	0.041429	0.886161	2	892	-0.1895
MXRA8	4	0.01821	0.041493	0.886161	2	893	-0.2545
ADIG	4	0.018242	0.041545	0.886161	2	894	-0.12525
MRPS30	4	0.018248	0.041553	0.886161	2	895	-0.20695
OLFM1	4	0.018258	0.041565	0.886161	2	896	-0.272
TM4SF4	4	0.018274	0.041587	0.886161	2	897	-0.122
DBNL	4	0.018352	0.041711	0.886562	1	898	0.0149
LRRC70	4	0.018354	0.041716	0.886562	2	899	-0.1995
BCL3	4	0.01837	0.041745	0.886562	2	900	-0.2655
COL1A2	4	0.018404	0.041804	0.886831	2	901	-0.1585
TBX19	4	0.018455	0.04188	0.887259	2	902	-0.18809
METTL11B	4	0.018507	0.041976	0.887259	1	903	0.03885
SSBP3	4	0.018516	0.04199	0.887259	2	904	-0.29235
OR2C1	4	0.018548	0.04204	0.887259	2	905	-0.2019
PEX2	4	0.018559	0.042056	0.887259	2	906	-0.243
DNM1	4	0.018663	0.042216	0.889665	1	907	-0.08765
TBRG4	4	0.018818	0.042439	0.892727	1	908	0.0253
ZNF205	4	0.018841	0.042472	0.892727	2	909	-0.1634
HOXB3	4	0.01887	0.042513	0.892727	1	910	-0.00835
HNRNPA3	4	0.018988	0.042711	0.892727	2	911	-0.314
NOP9	4	0.01902	0.042762	0.892727	2	912	-0.2458
BEND5	4	0.019029	0.042774	0.892727	2	913	-0.2019999265
SAP18	4	0.019045	0.042802	0.892727	2	914	-0.434
KCNH2	4	0.019061	0.04283	0.892727	2	915	-0.2825
IRF2	4	0.019077	0.042851	0.892727	2	916	0.0115
PRKACB	4	0.019078	0.042852	0.892727	2	917	-0.0815
NPPB	4	0.019127	0.042928	0.892727	2	918	-0.058
GPRC5B	4	0.019129	0.042931	0.892727	2	919	-0.2265
RPL31	4	0.019181	0.043004	0.892727	1	920	-0.036
TEK	4	0.019209	0.043048	0.892727	2	921	-0.262
CD70	4	0.019217	0.043062	0.892727	2	922	-0.165999245
DPP8	4	0.019285	0.043182	0.893647	1	923	0.03745
OR51B2	4	0.0193	0.043211	0.893647	2	924	-0.2104
MAD2L1	4	0.019349	0.043303	0.893647	2	925	-0.21825
PSMG3	4	0.019388	0.043365	0.893647	1	926	-0.3015
GCSAM	4	0.019399	0.043384	0.893647	2	927	-0.15645
EPN1	4	0.019465	0.043483	0.893647	2	928	-0.029
KCTD15	4	0.019473	0.043494	0.893647	2	929	-0.313
KRTAP12-4	4	0.01949	0.043524	0.893647	2	930	-0.2051
UPF2	4	0.019492	0.043528	0.893647	2	931	-0.3435
FGFR4	4	0.019564	0.043622	0.893866	2	932	-0.254
FKBP1A	4	0.019606	0.043683	0.893866	2	933	-0.348
PTPRM	4	0.019614	0.043697	0.893866	2	934	-0.16725
VSIG4	4	0.019647	0.043754	0.893866	1	935	-0.06855
DUS4L	4	0.019664	0.043772	0.893866	2	936	-0.257
CBLL1	4	0.019699	0.043831	0.894106	2	937	-0.207
SUMF2	4	0.019854	0.044107	0.898789	2	938	-0.2625
PPM1J	4	0.019889	0.04417	0.899119	2	939	-0.252
C10orf95	4	0.019958	0.044276	0.899188	2	940	-0.1445
CTDSP1	4	0.02001	0.04435	0.899188	1	941	-0.02115
PPP1R3G	4	0.020057	0.044426	0.899188	2	942	-0.2166
UBP1	4	0.020062	0.044437	0.899188	2	943	-0.1175
ZNF678	4	0.020073	0.044455	0.899188	2	944	-0.1728
PRAME	4	0.020165	0.04461	0.899188	2	945	-0.2665
LCN6	4	0.020174	0.044625	0.899188	2	946	-0.14935
TMEM171	4	0.020208	0.044674	0.899188	2	947	-0.2361
SIPA1L2	4	0.020217	0.044687	0.899188	1	948	-0.1095
CHST5	4	0.020269	0.044768	0.899188	2	949	-0.20855
PTPN22	4	0.020292	0.044806	0.899188	2	950	-0.3345
ARMC5	4	0.020317	0.04484	0.899188	2	951	-0.358
PTGFRN	4	0.020372	0.044933	0.899188	1	952	0.1936
OXLD1	4	0.020424	0.045004	0.899188	1	953	-0.286
MARCH7	4	0.020476	0.045086	0.899188	2	954	-0.197
TXNDC2	4	0.020495	0.045117	0.899188	2	955	-0.046
STKLD1	4	0.02052	0.045158	0.899188	2	956	-0.229
UBXN6	4	0.020527	0.04517	0.899188	1	957	-0.0919
SFRP1	4	0.020563	0.045225	0.899188	2	958	-0.3235
PDK4	4	0.020571	0.045237	0.899188	2	959	-0.261
STK39	4	0.020579	0.045255	0.899188	2	960	-0.163
GLYCTK	4	0.020622	0.045325	0.899188	2	961	-0.1504
KCNJ14	4	0.020631	0.04534	0.899188	2	962	-0.2755
ARHGEF11	4	0.020639	0.04535	0.899188	2	963	-0.083
PPP1R9A	4	0.020683	0.045419	0.899631	1	964	-0.0613
WBSCR28	4	0.020758	0.045525	0.900606	2	965	-0.2405
SRSF11	4	0.020786	0.045563	0.900606	1	966	0.1701
NAT6	4	0.020838	0.045641	0.90123	1	967	-0.13665
TMEM261	4	0.020941	0.045799	0.901798	1	968	-0.224
GPC2	4	0.020955	0.045822	0.901798	2	969	-0.278
PCDHA4	4	0.020963	0.045833	0.901798	2	970	-0.274
EIF2AK3	4	0.020993	0.045877	0.901798	1	971	-0.05905
CFAP99	4	0.02104	0.045943	0.901798	2	972	-0.21
NAIF1	4	0.021045	0.045953	0.901798	1	973	-0.2085
ADAP1	4	0.021097	0.046035	0.902468	2	974	-0.306
RSPH10B	4	0.021161	0.046138	0.902957	2	975	-0.431
ZNF600	4	0.021221	0.04623	0.902957	2	976	-0.4215
PDP1	4	0.021252	0.046281	0.902957	1	977	-0.0609
MAD2L1BP	4	0.021264	0.046301	0.902957	2	978	-0.5625
UQCRFS1	4	0.02129	0.046337	0.902957	2	979	-0.037
EIF1AX	4	0.021342	0.046412	0.902957	2	980	-0.4907
RHOXF1	4	0.021355	0.046433	0.902957	1	981	-0.06685
CECR6	4	0.021359	0.046438	0.902957	2	982	-0.14149
LRIG2	4	0.021419	0.046522	0.902957	2	983	-0.2296
RPS6KA4	4	0.021463	0.046598	0.902957	2	984	-0.27045
COG8	4	0.021471	0.04661	0.902957	2	985	-0.5775
DBP	4	0.021511	0.046677	0.902957	1	986	0.00438552
OR2A4	4	0.02154	0.04672	0.902957	2	987	-0.29895
FAIM3	4	0.021558	0.046744	0.902957	2	988	-0.24
FAM63A	4	0.021601	0.046815	0.902957	2	989	-0.341
ZRSR2	4	0.021614	0.046835	0.902957	1	990	-0.2195
FAM173B	4	0.021645	0.046885	0.902957	2	991	-0.2073
TYW5	4	0.021666	0.046917	0.902957	1	992	0.0471
TOR1A	4	0.021688	0.046957	0.902957	2	993	-0.2765
CCDC167	4	0.021717	0.047007	0.903005	1	994	-0.2975
HNRNPDL	4	0.021769	0.047082	0.903369	1	995	-0.1387
DNAH11	4	0.021792	0.04712	0.903369	2	996	-0.2098
PRR15L	4	0.021873	0.04723	0.904567	1	997	0.0185
NUDT3	4	0.021924	0.047318	0.905336	2	998	-0.112
SAP30BP	4	0.021976	0.047396	0.905936	2	999	-0.295
C9orf3	4	0.022028	0.047478	0.906584	1	1000	0.1225
PLAG1	4	0.022079	0.047557	0.906602	1	1001	0.07745
PDZD7	4	0.02209	0.047574	0.906602	2	1002	-0.28955
CCDC137	4	0.022183	0.047724	0.908559	1	1003	-0.1335
ARPC4-TTLL3	4	0.022234	0.0478	0.909103	1	1004	-0.16645
HSD3B1	4	0.022286	0.047879	0.90947	2	1005	-0.2485
CEP44	4	0.022309	0.047914	0.90947	2	1006	-0.25405
PDDC1	4	0.022338	0.047967	0.90957	2	1007	-0.10705
RBM15B	4	0.022397	0.048054	0.90996	2	1008	-0.117
UFD1L	4	0.022424	0.048096	0.90996	2	1009	-0.34035
CACNA1D	4	0.02245	0.048133	0.90996	2	1010	-0.16305
ASB16	4	0.022493	0.048201	0.90996	1	1011	0.04932
SLC12A8	4	0.022521	0.048246	0.90996	2	1012	-0.147
AQR	4	0.022547	0.048286	0.90996	2	1013	-0.28915
PCYOX1L	4	0.022574	0.048328	0.90996	2	1014	-0.123
FURIN	4	0.022596	0.048369	0.90996	1	1015	-0.3525
CLVS1	4	0.022648	0.048444	0.910167	1	1016	-0.17435
ACTR2	4	0.022671	0.048479	0.910167	2	1017	-0.18865
EXOC3L4	4	0.0227	0.048523	0.910167	1	1018	0.04265
ISPD	4	0.022751	0.048614	0.910605	2	1019	-0.1763
ABCB10	4	0.022803	0.048686	0.910605	1	1020	-0.09325
MARVELD3	4	0.022805	0.048689	0.910605	2	1021	-0.3715
CATIP	4	0.022855	0.048753	0.910906	1	1022	-0.03045
LPGAT1	4	0.022965	0.048923	0.91228	2	1023	-0.272
WDR91	4	0.02301	0.048995	0.91228	1	1024	-0.246
USP24	4	0.023027	0.049026	0.91228	2	1025	-0.7125
RPL29	4	0.023061	0.049083	0.91228	1	1026	0.1157
BIRC6	4	0.02309	0.049122	0.91228	2	1027	-0.3423
IL5RA	4	0.023108	0.049151	0.91228	2	1028	-0.1662
TOR2A	4	0.023113	0.04916	0.91228	1	1029	0.0981
IL7R	4	0.02332	0.049502	0.91553	2	1030	-0.269
ELN	4	0.023359	0.049568	0.91553	2	1031	-0.1864998325
CR1	4	0.023423	0.049658	0.91553	2	1032	-0.2495
VEZT	4	0.023458	0.049718	0.91553	2	1033	-0.1865
MTRNR2L3	4	0.023526	0.049827	0.91553	1	1034	0.06645
GNRH1	4	0.023566	0.049894	0.91553	2	1035	-0.195
OSTM1	4	0.023578	0.049907	0.91553	1	1036	-0.07188
MAPRE3	4	0.023584	0.049915	0.91553	2	1037	-0.2595
PRAMEF6	4	0.023602	0.049949	0.91553	2	1038	-0.4125
SRP9	4	0.023611	0.049961	0.91553	2	1039	-0.22705
ARPC5	4	0.023665	0.050051	0.91553	2	1040	-0.2805
PFN1	4	0.023681	0.050079	0.91553	2	1041	-0.4055
SLPI	4	0.023711	0.050126	0.91553	2	1042	-0.3075
CSNK2A3	4	0.023733	0.050156	0.91553	2	1043	-0.1055
ABCB4	4	0.023783	0.050237	0.91553	2	1044	-0.2645
TUBA8	4	0.023784	0.050239	0.91553	1	1045	-0.2435
KCNA10	3	0.023813	0.044734	0.899188	2	1046	-0.613
HIST1H4B	4	0.023836	0.050309	0.91553	1	1047	-0.04045
EN1	4	0.023888	0.050392	0.91553	1	1048	0.02799
SRBD1	4	0.023901	0.050407	0.91553	2	1049	-0.5475
ADAMTS7	4	0.02391	0.050418	0.91553	2	1050	-0.292
ARMC12	4	0.023939	0.050474	0.91553	1	1051	-0.08575
VLDLR	4	0.023965	0.050518	0.91553	2	1052	-0.2445
PCED1B	4	0.023991	0.050554	0.91553	1	1053	-0.0526
TMEM249	4	0.024037	0.050633	0.91553	2	1054	-0.3685
E2F4	4	0.024042	0.050645	0.91553	1	1055	0.06315
CTSZ	4	0.024056	0.050668	0.91553	2	1056	-0.2505
TAL1	4	0.024074	0.050692	0.91553	2	1057	-0.0845
OR10W1	4	0.024094	0.050727	0.91553	1	1058	0.313
EMC4	4	0.024101	0.050737	0.91553	2	1059	-0.2805
TRAPPC10	4	0.024146	0.050798	0.91553	1	1060	0.15175
ACP6	4	0.024197	0.050883	0.91553	1	1061	-0.242
SLC13A3	4	0.024211	0.050903	0.91553	2	1062	-0.299
MOGAT1	4	0.02422	0.050917	0.91553	2	1063	-0.356
C5orf66	4	0.024249	0.050964	0.91553	1	1064	-0.07905
GJC3	4	0.024352	0.051124	0.9171	2	1065	-0.11995
B4GALT1	4	0.024366	0.051147	0.9171	2	1066	-0.592
CDC37L1	4	0.024404	0.051206	0.917289	2	1067	-0.281
LRAT	4	0.024455	0.051279	0.917737	1	1068	-0.2235
SLC17A2	4	0.024507	0.051345	0.918064	1	1069	0.12236
TMEM180	4	0.024559	0.051427	0.918356	1	1070	-0.048
GDNF-AS1	4	0.024577	0.051458	0.918356	2	1071	-0.093
KIF1C	4	0.024713	0.051677	0.920594	1	1072	0.00689
EIF3C	4	0.024715	0.051679	0.920594	2	1073	-0.692
PYCRL	4	0.024771	0.051767	0.921304	2	1074	-0.259
VWC2	4	0.024868	0.051916	0.92309	1	1075	-0.01575
POU2F1	4	0.02492	0.052003	0.923345	1	1076	-0.1527
PIEZO1	4	0.024971	0.052089	0.923345	1	1077	-0.1966
SLC10A4	4	0.025023	0.052166	0.923345	2	1078	-0.10215
LCE1E	4	0.025048	0.0522	0.923345	2	1079	-0.2285
IL9R	4	0.025075	0.052241	0.923345	1	1080	-0.04298
C10orf88	4	0.025123	0.052323	0.923345	2	1081	-0.1597
TMEM218	4	0.025126	0.052331	0.923345	2	1082	-0.219
BLM	4	0.025178	0.05241	0.923345	2	1083	-0.2951
SNX33	4	0.025178	0.052411	0.923345	2	1084	-0.2485
SPECC1	4	0.025206	0.052451	0.923345	2	1085	-0.223
LMX1B	4	0.025229	0.052489	0.923345	1	1086	-0.0804
SPINK6	4	0.025281	0.052558	0.923345	2	1087	-0.202
TNFRSF11B	4	0.025281	0.052558	0.923345	1	1088	-0.03265
HIST1H2AK	4	0.025332	0.052649	0.924088	1	1089	-0.0714
RNFT2	4	0.02543	0.052794	0.925783	2	1090	-0.11245
TERF2IP	4	0.025487	0.052888	0.926587	1	1091	0.0161
GFRA2	4	0.025539	0.052969	0.927152	2	1092	-0.2145
LRRN4	4	0.02559	0.053045	0.927457	1	1093	-0.05023
DSTYK	4	0.025642	0.053129	0.927457	2	1094	-0.15385
OR8G2	4	0.025683	0.053185	0.927457	2	1095	-0.253
CDR1	4	0.025758	0.053301	0.927457	2	1096	-0.062
CYTL1	4	0.025795	0.05336	0.927457	2	1097	-0.085
TMSB10	4	0.025796	0.053362	0.927457	1	1098	0.01445
PFDN6	4	0.025824	0.05341	0.927457	2	1099	-0.7055
CADM2	4	0.025842	0.053432	0.927457	2	1100	-0.33
GJA8	4	0.025848	0.053441	0.927457	1	1101	-0.11
SMAD2	4	0.025889	0.0535	0.927457	2	1102	-0.2088
ZNF710	4	0.0259	0.05352	0.927457	1	1103	-0.1815
KRTAP5-2	4	0.026003	0.053676	0.929316	1	1104	-0.197
2011-09-01	4	0.026054	0.053746	0.929651	1	1105	-0.2445
FAM13A	4	0.026106	0.053825	0.929651	1	1106	-0.255
SRF	4	0.026116	0.053841	0.929651	2	1107	-0.4515
EDAR	4	0.026157	0.05391	0.930001	1	1108	0.01255
DDO	4	0.026248	0.054051	0.930305	2	1109	-0.13489
PANK4	4	0.026258	0.054061	0.930305	2	1110	-0.2755
SLC17A5	4	0.026267	0.054074	0.930305	2	1111	-0.14615
CHIA	4	0.026312	0.054151	0.930733	2	1112	-0.2465
PRKAB1	4	0.026343	0.054196	0.930733	2	1113	-0.1216
DCK	4	0.026543	0.054487	0.934361	2	1114	-0.2385
TMEM174	4	0.026569	0.054538	0.934361	1	1115	-0.1257
IL6	4	0.026609	0.054601	0.934361	2	1116	-0.24275
USF2	4	0.026621	0.054615	0.934361	1	1117	-0.2115
LEKR1	4	0.026647	0.054659	0.934361	2	1118	-0.212
CNOT6	4	0.026673	0.054701	0.934361	1	1119	-0.029
ACYP2	4	0.026724	0.054796	0.935153	2	1120	-0.21996
YWHAH	4	0.026776	0.054871	0.935248	1	1121	0.136000082
ADAM17	4	0.026827	0.054948	0.935248	1	1122	-0.208
DMC1	4	0.026848	0.054976	0.935248	2	1123	-0.13895
BTN1A1	4	0.026867	0.05501	0.935248	2	1124	-0.2775
MECR	4	0.026886	0.055046	0.935248	2	1125	-0.2675
HYOU1	4	0.027033	0.055275	0.938303	1	1126	-0.205
NIPAL1	4	0.027126	0.05541	0.939046	2	1127	-0.1634
SPATA2	4	0.027174	0.055487	0.939046	2	1128	-0.318
PFKFB4	4	0.027239	0.055594	0.939046	1	1129	-0.0823
FAM65A	4	0.027261	0.055632	0.939046	2	1130	-0.094
MYOM2	4	0.02728	0.05566	0.939046	2	1131	-0.22025
CLCA4	4	0.02729	0.055677	0.939046	2	1132	-0.27
CDK10	4	0.027342	0.055758	0.939046	2	1133	-0.1826
DNAJB4	4	0.027367	0.055784	0.939046	2	1134	-0.13015
TLE6	4	0.027386	0.055816	0.939046	2	1135	-0.275
DNAH5	4	0.027394	0.055823	0.939046	1	1136	0.0205
RRNAD1	4	0.027434	0.055887	0.939046	2	1137	-0.249
ISG20L2	4	0.027473	0.055944	0.939046	2	1138	-0.2665
ZAN	4	0.027497	0.055987	0.939046	1	1139	-0.1725
OR2H1	4	0.027548	0.056074	0.939046	2	1140	-0.2828
ITGA1	4	0.02757	0.056105	0.939046	2	1141	-0.292765
NEUROD6	4	0.027638	0.056218	0.940122	2	1142	-0.238
JRK	4	0.027702	0.056318	0.940624	1	1143	-0.16225
RHBDL1	4	0.027735	0.056366	0.940624	2	1144	-0.2984
MCM3	4	0.027754	0.056396	0.940624	1	1145	-0.09895
ZNF345	4	0.027805	0.05648	0.940706	1	1146	-0.01345
TST	4	0.02791	0.056627	0.940706	2	1147	-0.20439
KLHL3	4	0.02796	0.056699	0.940706	1	1148	0.0075
TBC1D10A	4	0.027978	0.056732	0.940706	2	1149	-0.0975
CTBS	4	0.028011	0.056791	0.940706	1	1150	-0.2247
COL4A3BP	4	0.028056	0.056846	0.940706	2	1151	-0.2455
SP2	4	0.028114	0.056942	0.940706	1	1152	-0.05475
RIMBP3C	4	0.028134	0.056965	0.940706	2	1153	-0.1705
CHN2	4	0.028212	0.057075	0.940706	2	1154	-0.16165
PEF1	4	0.028217	0.057079	0.940706	1	1155	-0.3135
SF3B4	4	0.028269	0.057158	0.940706	1	1156	0.1371
XPNPEP3	4	0.028281	0.057176	0.940706	2	1157	-0.20235
FTSJ1	4	0.02833	0.057248	0.940706	2	1158	-0.265
CARKD	4	0.028372	0.057317	0.940706	1	1159	0.03005
YTHDF1	4	0.028423	0.057402	0.940706	2	1160	-0.1891
RBBP4	4	0.028474	0.057473	0.940706	1	1161	-0.4175
LPPR4	4	0.028477	0.057476	0.940706	2	1162	-0.2417
PTCHD4	4	0.028516	0.057542	0.940706	2	1163	-0.27
GPRASP1	4	0.028526	0.057552	0.940706	1	1164	-0.1915
BMP15	4	0.028577	0.057631	0.940706	2	1165	-0.1815
VIPR1	4	0.028595	0.057662	0.940706	2	1166	-0.25085
DHX8	4	0.028654	0.057753	0.940706	2	1167	-0.5742
CLIC4	4	0.028664	0.057769	0.940706	2	1168	-0.1763
ARHGAP10	4	0.028713	0.057841	0.940706	2	1169	-0.15885
METTL9	4	0.028723	0.057855	0.940706	2	1170	-0.344
NUP98	4	0.028732	0.057866	0.940706	2	1171	-0.388
TCAF2	4	0.028782	0.05795	0.940706	2	1172	-0.10135
MYO7A	4	0.028783	0.057952	0.940706	1	1173	0.0375
MAP3K7	4	0.028834	0.058049	0.940706	2	1174	-0.2218
CLTB	4	0.028886	0.058117	0.940706	1	1175	0.207
TRIM11	4	0.02892	0.058179	0.940706	2	1176	-0.20735
FBXL7	4	0.028937	0.058206	0.940706	1	1177	-0.03
MFNG	4	0.02894	0.058209	0.940706	2	1178	-0.2562
STOX2	4	0.028989	0.058295	0.940706	1	1179	-0.03615
STAU2	4	0.02904	0.058363	0.940706	2	1180	-0.22
TECTA	4	0.029059	0.058392	0.940706	2	1181	-0.1818
NCR3	4	0.029069	0.058413	0.940706	2	1182	-0.303
IFNA10	4	0.029079	0.058432	0.940706	2	1183	-0.34
C11orf40	4	0.029092	0.058453	0.940706	1	1184	-0.163
CHST10	4	0.029128	0.058509	0.940706	2	1185	-0.2815
ADIPOR2	4	0.029143	0.058532	0.940706	1	1186	-0.0614998305
COMMD4	4	0.029158	0.058557	0.940706	2	1187	-0.13405
KLF11	4	0.029194	0.05861	0.940706	1	1188	0.03895051
CSTB	4	0.029198	0.058616	0.940706	2	1189	-0.21637
SLC10A3	4	0.029246	0.058692	0.941138	1	1190	0.13255
CLASRP	4	0.029347	0.058851	0.942157	2	1191	-0.4915
ADCY4	4	0.029349	0.058854	0.942157	1	1192	-0.11495
FAM120C	4	0.029397	0.058928	0.942554	2	1193	-0.275
CFTR	4	0.029452	0.059014	0.943131	1	1194	-0.2295
OSMR	4	0.029506	0.059094	0.94348	2	1195	-0.018
TMEM145	4	0.029546	0.059168	0.94348	2	1196	-0.0235
ST20-MTHFS	4	0.029554	0.059183	0.94348	1	1197	-0.16
SPATA17	4	0.029596	0.059243	0.943634	2	1198	-0.269
IFT122	4	0.029657	0.059348	0.943749	1	1199	-0.2445
IRX4	4	0.029709	0.059427	0.944071	2	1200	-0.3145
RPIA	4	0.02976	0.059512	0.944071	2	1201	-0.613
OR2T8	4	0.029776	0.059548	0.944071	2	1202	-0.14
C1orf141	4	0.029786	0.059566	0.944071	2	1203	-0.2365
SLC39A9	4	0.029863	0.059684	0.944424	1	1204	0.0481
AIFM1	4	0.029937	0.059788	0.944424	2	1205	-0.4135
GAD1	4	0.029947	0.059802	0.944424	2	1206	-0.27795
ZNRF4	4	0.029957	0.059821	0.944424	2	1207	-0.102
C7orf77	4	0.029965	0.059836	0.944424	1	1208	0.044225
VSIG2	4	0.030017	0.059922	0.944581	1	1209	-0.04455
PHACTR3	4	0.030027	0.059944	0.944581	2	1210	-0.1682
VPS4A	4	0.030068	0.060009	0.944823	1	1211	0.0606
TTC39C	4	0.03012	0.060079	0.945145	1	1212	-0.11415
SLC6A17	4	0.030178	0.060167	0.945234	2	1213	-0.3245
ALG1L2	4	0.030222	0.060246	0.945234	2	1214	-0.461
C9orf62	4	0.030299	0.06036	0.945234	2	1215	-0.2023
SEC31B	4	0.030325	0.060401	0.945234	1	1216	0.066
BCAP29	4	0.03041	0.060541	0.945234	2	1217	-0.284
BCL2L1	4	0.030428	0.060569	0.945234	1	1218	0.045
GPX8	4	0.030461	0.060613	0.945234	2	1219	-0.218
RASL12	4	0.030479	0.060635	0.945234	2	1220	-0.218
SRFBP1	4	0.030491	0.060654	0.945234	2	1221	-0.2965
UVRAG	4	0.030512	0.060689	0.945234	2	1222	-0.14075
MCAT	4	0.030522	0.060703	0.945234	2	1223	-0.394
C1QTNF3	3	0.030576	0.056044	0.939046	2	1224	-0.206
DEFB105B	4	0.030583	0.0608	0.945234	2	1225	-0.1925
KIAA1324L	4	0.030633	0.060891	0.945234	1	1226	0.082
BCAS4	4	0.030685	0.060973	0.945234	1	1227	-0.1264
STARD7	4	0.030755	0.061076	0.945234	2	1228	-0.4445
INSL4	4	0.030787	0.061121	0.945234	1	1229	-0.205
ISCA1	4	0.030796	0.06113	0.945234	2	1230	-0.45
EDN2	4	0.030839	0.061198	0.945234	2	1231	-0.3285
SPATA25	4	0.03089	0.061273	0.945234	1	1232	0.01345
ZNF326	4	0.030941	0.061371	0.945234	1	1233	-0.10649949
NUS1	3	0.030942	0.056646	0.940706	2	1234	-0.332
MEGF9	4	0.030989	0.061442	0.945234	2	1235	-0.1121
EVI5L	4	0.030993	0.061449	0.945234	1	1236	-0.164
ARMS2	4	0.03101	0.061479	0.945234	2	1237	-0.114
ELL2	4	0.031044	0.061532	0.945234	1	1238	0.0125
KLHL15	4	0.031173	0.061744	0.945234	2	1239	-0.205
TMEM220	4	0.031224	0.06182	0.945234	2	1240	-0.19295
TPP2	4	0.031245	0.061857	0.945234	2	1241	-0.23335
ANKRD17	4	0.03125	0.061863	0.945234	2	1242	-0.17415
C10orf71	4	0.031301	0.061932	0.945234	2	1243	-0.2465
SPRR2A	4	0.031306	0.061938	0.945234	2	1244	-0.137
RXRA	4	0.031327	0.061968	0.945234	2	1245	-0.464
NOL7	4	0.031337	0.061985	0.945234	2	1246	-0.547
PYGO2	4	0.031352	0.062007	0.945234	1	1247	-0.16025
PTCHD1	4	0.031357	0.062014	0.945234	2	1248	-0.307
SNX21	4	0.031368	0.062028	0.945234	2	1249	-0.032
NAT8B	4	0.031404	0.062079	0.945234	1	1250	-0.2215
SHFM1	4	0.031419	0.0621	0.945234	2	1251	-0.368
GDF15	4	0.031506	0.062234	0.945234	1	1252	0.08955
CTRB2	4	0.031542	0.062296	0.945234	2	1253	-0.333
CREB3L4	4	0.031557	0.062317	0.945234	2	1254	-0.235
CLK2	4	0.031563	0.06232	0.945234	2	1255	-0.2185
CASS4	4	0.031604	0.062382	0.945234	2	1256	-0.17475
KIAA0754	4	0.031609	0.06239	0.945234	1	1257	0.14645
NRDE2	4	0.031763	0.062612	0.945234	1	1258	0.262
ZNF280D	4	0.031779	0.06263	0.945234	2	1259	-0.1465
SYNGR3	4	0.03181	0.062678	0.945234	2	1260	-0.358
OR6Y1	4	0.031851	0.062738	0.945234	2	1261	-0.22185
NUP205	4	0.031865	0.06276	0.945234	1	1262	-0.137
DNAH1	4	0.031903	0.062815	0.945234	2	1263	-0.10625
TNIP1	4	0.031917	0.062836	0.945234	2	1264	-0.28335
PDE1C	4	0.031944	0.06287	0.945234	2	1265	-0.2925
ZBTB6	4	0.031965	0.062901	0.945234	2	1266	-0.1588
SERPINH1	4	0.031968	0.062909	0.945234	1	1267	0.151500955
FAM135B	4	0.032016	0.062979	0.945234	2	1268	-0.0535
C1orf109	4	0.032037	0.063015	0.945234	2	1269	-0.3715
TNFSF4	4	0.032047	0.063029	0.945234	2	1270	-0.237
TSN	4	0.032058	0.063048	0.945234	2	1271	-0.1454
STX16	4	0.032071	0.063068	0.945234	1	1272	-0.1645
STXBP3	4	0.03211	0.063127	0.945234	2	1273	-0.4845
USP32	4	0.032122	0.063151	0.945234	1	1274	-0.1985
CYP4F2	4	0.032173	0.063241	0.945649	1	1275	-0.1955
MIER2	4	0.032213	0.063308	0.945649	2	1276	-0.201
LRRC72	4	0.032244	0.063364	0.945649	2	1277	-0.222
C10orf113	4	0.032276	0.063412	0.945649	1	1278	-0.14205
FGF1	4	0.032286	0.063426	0.945649	2	1279	-0.2337
ATAD3C	4	0.03239	0.063586	0.946739	2	1280	-0.3275
NFE2L3	4	0.0324	0.063605	0.946739	2	1281	-0.1309
ALG9	4	0.03243	0.063648	0.946739	1	1282	-0.0957
MYO18B	4	0.032481	0.063735	0.946739	1	1283	-0.1043
TBC1D24	4	0.032532	0.063822	0.946739	2	1284	-0.11525
MYH15	4	0.032535	0.063825	0.946739	2	1285	-0.3035
CENPP	3	0.032566	0.059347	0.943749	2	1286	-0.349
CDRT15L2	4	0.032588	0.0639	0.946739	2	1287	-0.1642
CACNA1C	4	0.032608	0.063931	0.946739	2	1288	-0.227
FCRL4	4	0.032629	0.063959	0.946739	2	1289	-0.2315
QSOX1	4	0.032661	0.064006	0.946739	2	1290	-0.1483
ANGPTL3	4	0.032686	0.064044	0.946739	1	1291	0.0788
CSNK1G1	4	0.032737	0.064124	0.947193	2	1292	-0.2405
SERBP1	4	0.033069	0.064619	0.951302	2	1293	-0.488
ORM1	4	0.033096	0.064661	0.951302	1	1294	0.0453
C19orf25	4	0.033148	0.064749	0.951302	2	1295	-0.336499935
FCAR	4	0.033153	0.064755	0.951302	2	1296	-0.22
CALML5	4	0.033174	0.064783	0.951302	2	1297	-0.328
ZNF181	4	0.033199	0.064821	0.951302	1	1298	0.09285
ATXN3	4	0.033205	0.064828	0.951302	2	1299	-0.23585
PLS3	4	0.033216	0.064844	0.951302	2	1300	-0.1629
TMEM243	4	0.033226	0.064854	0.951302	2	1301	-0.2045
AAED1	4	0.033268	0.064928	0.951302	2	1302	-0.20325
LOC100289561	4	0.033301	0.064993	0.951302	2	1303	-0.115
KIAA1324	4	0.03331	0.065	0.951302	2	1304	-0.224
TBC1D20	4	0.033353	0.065073	0.95165	1	1305	0.0536
MAGT1	3	0.033362	0.060648	0.945234	2	1306	-0.389
FCGR3A	4	0.033455	0.065236	0.9533	1	1307	0.000400000000000001
SLC22A31	4	0.0335	0.065303	0.953547	2	1308	-0.107355
PET100	4	0.033558	0.065392	0.954127	1	1309	0.07822
MAB21L2	4	0.033743	0.065665	0.956403	2	1310	-0.18035
TRMT13	4	0.033763	0.065698	0.956403	2	1311	-0.2245
C16orf95	4	0.033814	0.065771	0.956403	1	1312	-0.0725
PHGDH	4	0.033817	0.065775	0.956403	2	1313	-0.3995
NFKBIB	4	0.033865	0.065851	0.956403	1	1314	0.107
C3orf84	4	0.033916	0.065934	0.956403	1	1315	0.05195
SEMA5A	4	0.033955	0.065992	0.956403	2	1316	-0.226
UGDH	4	0.033967	0.066011	0.956403	2	1317	-0.1569
LIPG	4	0.033987	0.066042	0.956403	2	1318	-0.404
HDAC3	4	0.034008	0.066083	0.956403	2	1319	-0.7125
PRDM6	4	0.034019	0.066102	0.956403	2	1320	-0.2195
PTPN7	4	0.03407	0.066176	0.956403	1	1321	-0.0378
C9orf171	4	0.034083	0.066199	0.956403	2	1322	-0.3225
E2F2	4	0.034121	0.066255	0.956489	1	1323	0.1475
SF3A1	3	0.034202	0.062058	0.945234	1	1324	-0.591
ZBTB22	4	0.034224	0.066414	0.958068	2	1325	-0.2201
VOPP1	4	0.034317	0.066551	0.958076	2	1326	-0.18865
TMED4	4	0.034377	0.066645	0.958076	1	1327	-0.178
ASXL1	4	0.034445	0.066746	0.958076	2	1328	-0.361
ZNF620	4	0.034456	0.06676	0.958076	2	1329	-0.0865
CELA3A	4	0.034477	0.066793	0.958076	2	1330	-0.2149
ACVR2B	4	0.034531	0.066873	0.958076	1	1331	-0.1805
NIT2	4	0.034541	0.066888	0.958076	2	1332	-0.299
GJD2	4	0.034595	0.066966	0.958076	2	1333	-0.1765
C12orf73	4	0.034627	0.06701	0.958076	2	1334	-0.3425
SLC25A3	4	0.034633	0.067023	0.958076	1	1335	-0.254
APOBEC3H	4	0.034648	0.067047	0.958076	2	1336	-0.0695
ANKRD23	4	0.03468	0.067088	0.958076	2	1337	-0.14255
RAB3C	4	0.034684	0.067094	0.958076	1	1338	-0.04235
GGA3	4	0.034734	0.067178	0.958076	2	1339	-0.221
COX19	4	0.034755	0.067215	0.958076	2	1340	-0.2665
LCN9	4	0.034777	0.067247	0.958076	2	1341	-0.2152
TEKT1	4	0.034788	0.067267	0.958076	2	1342	-0.10685
ZNF808	4	0.034889	0.067434	0.959457	1	1343	-0.0477
ZNF211	4	0.03494	0.067506	0.959457	1	1344	-0.1465
GRIK1	4	0.034949	0.067514	0.959457	2	1345	-0.25235
RFPL4A	4	0.034992	0.06758	0.959679	1	1346	0.07745
ZMYND12	4	0.035035	0.067652	0.959981	2	1347	-0.0645
LOC101928436	4	0.035094	0.067743	0.960561	1	1348	0.0005
KCNJ4	4	0.035164	0.067855	0.960964	2	1349	-0.4095
PPAP2C	4	0.035196	0.067915	0.960964	1	1350	-0.0982
MDGA1	4	0.035283	0.068057	0.962108	2	1351	-0.092795
SHC4	4	0.035401	0.068243	0.962108	1	1352	0.09031
DEFB134	4	0.035434	0.068289	0.962108	2	1353	-0.1895
[truncated: 17,761 more rows]
