# Supplementary material
Source: Research Square preprint supplement (doi:10.21203/rs.3.rs-9858448/v1)
Supplement: Supplementary file 3 [file 40270a6c874ff508849bc9c5.xlsx]

## Sheet: analysis_results_between_cond
Compound_Id	onc.name	rep.clinical_phase	rep.moa	rep.target	rep.disease_area	rep.indication	c_r1	c_r2	c_r3	b_r1	b_r2	b_r3	c_mean	c_sd	b_mean	b_sd	c_mean_pvalue	c_mean_fdr	b_mean_pvalue	b_mean_fdr	b,c_diff	b,c_pvalue	b,c_fdr
ONC0001980	Elbasvir	Launched	HCV inhibitor		infectious disease	hepatitis C	1.39	1.2	1.19	0.35	0.25	0.27	1.26	0.113	0.29	0.0529	0.992	1	1.44e-27	3.98e-26	-0.97	0.000579	0.151
ONC0001757	TC-G-1004	Preclinical	adenosine receptor antagonist	ADORA2A			1.15	1.21	1.31	0.25	0.18	0.42	1223	0.0808	0.283	0.123	0.98	1	4.66e-28	1.33e-26	-0.94	0.000412	0.136
ONC0000012	JNJ-10397049	Preclinical	orexin receptor antagonist	HCRTR1|HCRTR2			1.17	1.1	1.33	0.42	0.3	0.33	1.2	0.118	0.35	0.0624	0.966	1	2.25e-23	5.5e-22	-0.85	0.00075	0.151
ONC0002862	NICLOSAMIDE	Launched	DNA replication inhibitor|STAT inhibitor	STAT3	infectious disease	tapeworm	1.39	1.16	1.45	0.64	0.42	0.4	1333	0.153	0.487	0.133	0.999	1	3.43e-15	6.31e-14	-0.847	0.00105	0.153
ONC0001907	RS-39604	Preclinical	serotonin receptor antagonist	HTR4			1.29	1.13	1.18	0.53	0.39	0.23	1.2	0.0819	0.383	0.15	0.966	1	3.33e-21	7.96e-20	-0.817	0.00165	0.157
ONC0000733	Flumatinib (mesylate)	NA	NA	NA	NA	NA	1.31	0.99	1.05	0.12	0.36	0.43	1117	0.17	0.303	0.163	0.847	0.98	1.32e-26	3.58e-25	-0.813	0.00197	0.172
ONC0000957	BAY 61-3606 (dihydrochloride)	NA	NA	NA	NA	NA	1.49	0.92	1.09	0.35	0.27	0.45	1167	0.293	0.357	0.0902	0.934	1	6.24e-23	1.52e-21	-0.81	0.0159	0.349
ONC0000149	GW-583340	Preclinical	EGFR inhibitor	EGFR|ERBB2			1.16	1.1	0.94	0.22	0.23	0.35	1067	0.114	0.267	0.0723	0.707	0.935	2.67e-29	8.08e-28	-0.8	0.000566	0.151
ONC0001070	Elacridar	Phase 1	P glycoprotein inhibitor	ABCB1			1.09	1.11	1.2	0.23	0.53	0.29	1133	0.0586	0.35	0.159	0.882	0.993	2.25e-23	5.5e-22	-0.783	0.00364	0.223
ONC0001569	RWJ-50271	Preclinical	integrin inhibitor	ICAM1			1.3	1.26	1.26	0.58	0.46	0.53	1273	0.0231	0.523	0.0603	0.994	1	2.56e-13	4.26e-12	-0.75	0.000334	0.134
ONC0000723	Afatinib (dimaleate)	NA	NA	NA	NA	NA	0.72	0.82	0.6	-0.05	0.05	-0.03	0.713	0.11	-0.01	0.0529	0.00212	0.0302	4.54e-54	1.02e-51	-0.723	0.00118	0.153
ONC0001882	SLx-2119	NA	NA	NA	NA	NA	0.93	0.91	0.98	0.14	0.2	0.32	0.94	0.0361	0.22	0.0917	0.249	0.706	6.28e-33	2.25e-31	-0.72	0.00104	0.153
ONC0001398	gefitinib	Launched	EGFR inhibitor	EGFR	oncology	non-small cell lung cancer (NSCLC)	1.22	1.34	1.14	0.5	0.54	0.51	1233	0.101	0.517	0.0208	0.984	1	1.2e-13	2.03e-12	-0.717	0.00249	0.186
ONC0005411	VX-11e	Preclinical	MAP kinase inhibitor	MAPK1			0.92	0.88	0.82	0.14	0.19	0.15	0.873	0.0503	0.16	0.0265	0.0936	0.451	6.39e-38	3.19e-36	-0.713	0.000101	0.0897
ONC0002534	ZK-93423	Phase 3	benzodiazepine receptor agonist	GABRA1|GABRA2|GABRA3|GABRA5|GABRB2|GABRG2			1.36	1.24	1.3	0.73	0.61	0.43	1.3	0.06	0.59	0.151	0.997	1	2.91e-10	4.33e-09	-0.71	0.00379	0.227
ONC0001942	MK-2295	Phase 2	TRPV antagonist	TRPV1			0.77	1	1.53	0.35	0.43	0.42	1.1	0.39	0.4	0.0436	0.806	0.968	3.68e-20	8.37e-19	-0.7	0.0439	0.493
ONC0001702	reversan	Preclinical	MRP inhibitor	ABCC1			1.06	1.15	1.05	0.42	0.37	0.43	1087	0.0551	0.407	0.0321	0.769	0.954	9.46e-20	2.09e-18	-0.68	0.000112	0.0897
ONC0005098	MK-2461	Phase 1/Phase 2	FGFR inhibitor|VEGFR inhibitor	FGFR1|FGFR2|FGFR3|FLT1|FLT3|FLT4|KDR|MERTK|MET|MST1R|NTRK1|NTRK2|PDGFRB			0.93	1.58	1.75	0.84	0.65	0.75	1.42	0.433	0.747	0.095	1	1	7.79e-05	0.000786	-0.673	0.0542	0.53
ONC0001850	APY0201	Preclinical	phosphoinositide dependent kinase inhibitor	IL12A|IL12B|PIKFYVE			0.67	0.58	0.58	-0.03	-0.09	-0.07	0.61	0.052	-0.063	0.0306	5.79e-05	0.00121	9.53e-60	4.88e-57	-0.673	9.34e-05	0.0897
ONC0001828	WAY-207024	Preclinical	gonadotropin releasing factor hormone receptor antagonist	GNRHR|HRH2|TACR2			1.59	0.9	1.09	0.55	0.56	0.46	1193	0.356	0.523	0.0551	0.961	1	2.56e-13	4.26e-12	-0.67	0.0397	0.471
ONC0001215	BRD4770	Preclinical	histone lysine methyltransferase inhibitor	EHMT2			0.79	0.92	1.19	0.31	0.32	0.3	0.967	0.204	0.31	0.01	0.337	0.769	3.95e-26	1.05e-24	-0.657	0.0152	0.342
ONC0004418	GSK2578215A	Preclinical	leucine rich repeat kinase inhibitor	LRRK2			1.22	1.03	0.94	0.53	0.31	0.39	1063	0.143	0.41	0.111	0.695	0.93	1.51e-19	3.29e-18	-0.653	0.00203	0.173
ONC0000024	GNF-5837	Preclinical	growth factor receptor inhibitor	NTRK1|NTRK2|NTRK3			0.92	0.94	1.28	0.41	0.34	0.44	1047	0.202	0.397	0.0513	0.637	0.909	2.29e-20	5.31e-19	-0.65	0.0125	0.318
ONC0005255	NVP-TAE226	Preclinical	protein tyrosine kinase inhibitor	PTK2			0.59	1.03	0.86	0.14	0.17	0.25	0.827	0.222	0.187	0.0569	0.0385	0.274	1.18e-35	4.94e-34	-0.64	0.0156	0.347
ONC0002082	G007-LK	Preclinical	tankyrase inhibitor	TNKS|TNKS2			1.09	0.95	0.87	0.27	0.34	0.38	0.97	0.111	0.33	0.0557	0.349	0.774	9.87e-25	2.54e-23	-0.64	0.00161	0.157
ONC0005018	Varlitinib	NA	NA	NA	NA	NA	1.15	0.78	0.99	0.43	0.26	0.34	0.973	0.186	0.343	0.085	0.361	0.778	8.01e-24	2e-22	-0.63	0.00758	0.283
ONC0000856	BMS-599626	Phase 1	EGFR inhibitor|protein tyrosine kinase inhibitor	EGFR|ERBB2|ERBB4			0.92	1.06	1.16	0.4	0.54	0.31	1047	0.121	0.417	0.116	0.637	0.909	3.81e-19	8.13e-18	-0.63	0.00143	0.154
ONC0000072	SB-216641	Preclinical	serotonin receptor antagonist	HTR1A|HTR1B|HTR1D|HTR2A|HTR2B|HTR2C			1.2	1	0.99	0.42	0.35	0.53	1063	0.118	0.433	0.0907	0.695	0.93	3.7e-18	7.6e-17	-0.63	0.0012	0.153
ONC0001315	Ko 143	NA	NA	NA	NA	NA	1	1.24	1.26	0.53	0.53	0.58	1167	0.145	0.547	0.0289	0.934	1	3.38e-12	5.45e-11	-0.62	0.00742	0.283
ONC0005149	CC-292 (AVL-292)	NA	NA	NA	NA	NA	0.96	0.73	0.79	0.14	0.44	0.08	0.827	0.119	0.22	0.193	0.0385	0.274	6.28e-33	2.25e-31	-0.607	0.00747	0.283
ONC0002430	Sunitinib	Launched	FLT3 inhibitor|KIT inhibitor|PDGFR tyrosine kinase receptor inhibitor|RET tyrosine kinase inhibitor|VEGFR inhibitor	CSF1R|FGFR1|FLT1|FLT3|FLT4|KDR|KIT|PDGFRA|PDGFRB|RET	oncology	gastrointestinal stromal tumors (GIST)|renal cell carcinoma (RCC)|neuroendocrine tumors of pancreatic origin (PNET)	1.23	0.91	0.71	0.41	0.28	0.34	0.95	0.262	0.343	0.0651	0.281	0.736	8.01e-24	2e-22	-0.607	0.0249	0.395
ONC0001017	SR-3306	Preclinical	JNK inhibitor	MAPK10|MAPK8|MAPK9			0.98	0.98	0.71	0.35	0.29	0.22	0.89	0.156	0.287	0.0651	0.123	0.519	8.19e-28	2.29e-26	-0.603	0.00589	0.26
ONC0005067	A-674563	Preclinical	AKT inhibitor	AKT1|PKIA|PRKACA			1.16	1.42	1.07	0.72	0.57	0.58	1217	0.182	0.623	0.0839	0.977	1	6.67e-09	9.12e-08	-0.593	0.00835	0.293
ONC0002247	Rimiducid	NA	NA	NA	NA	NA	1.18	1.13	1.15	0.48	0.6	0.6	1153	0.0252	0.56	0.0693	0.916	1	1.39e-11	2.19e-10	-0.593	0.000946	0.153
ONC0000079	TC-ASK-10	Preclinical	MAP kinase inhibitor	MAP3K5|MAP3K6			0.67	1.25	0.88	0.26	0.35	0.41	0.933	0.294	0.34	0.0755	0.229	0.688	4.76e-24	1.2e-22	-0.593	0.0324	0.427
ONC0004706	Regorafenib (BAY 73-4506)	NA	NA	NA	NA	NA	1.1	1.1	1.85	0.78	0.68	0.82	1.35	0.433	0.76	0.0721	0.999	1	0.000174	0.00168	-0.59	0.0694	0.565
ONC0004624	Nilotinib (AMN-107)	NA	NA	NA	NA	NA	0.97	0.93	1.11	0.32	0.47	0.45	1003	0.0945	0.413	0.0814	0.473	0.837	2.4e-19	5.18e-18	-0.59	0.000663	0.151
ONC0004965	AST-1306	Phase 1	EGFR inhibitor	EGFR|ERBB2			0.83	0.99	0.98	0.39	0.28	0.37	0.933	0.0896	0.347	0.0586	0.229	0.688	1.34e-23	3.32e-22	-0.587	0.000687	0.151
ONC0002997	PQ-401	Preclinical	IGF-1 inhibitor	IGF1R			1.12	0.78	1.03	0.28	0.53	0.36	0.977	0.176	0.39	0.128	0.373	0.785	8.79e-21	2.06e-19	-0.587	0.00593	0.26
ONC0003128	UNC-3230	Preclinical	phosphatidyl-inositol activator	PIP5K1C			0.74	1.17	1.51	0.59	0.46	0.62	1.14	0.386	0.557	0.085	0.894	0.998	9.82e-12	1.56e-10	-0.583	0.057	0.538
ONC0000825	neurodazine	Preclinical	neurogenesis of non-pluripotent C2C12 myoblast inducer				1.14	1.01	1.01	0.51	0.48	0.44	1053	0.0751	0.477	0.0351	0.661	0.916	1e-15	1.88e-14	-0.577	0.000801	0.151
ONC0003581	SIS3	Preclinical	serine/threonine kinase inhibitor	SMAD3|TGFBR1			1.23	1.02	1.09	0.58	0.5	0.54	1113	0.107	0.54	0.04	0.84	0.979	1.64e-12	2.66e-11	-0.573	0.00292	0.198
ONC0003984	LUFENURON	Launched	chitin inhibitor		infectious disease	flea control	1.39	1.25	1.18	0.78	0.67	0.65	1273	0.107	0.7	0.07	0.994	1	3.39e-06	3.85e-05	-0.573	0.00133	0.154
ONC0000455	METHOTREXATE HYDRATE	NA	NA	NA	NA	NA	0.89	0.96	0.84	0.26	0.41	0.3	0.897	0.0603	0.323	0.0777	0.137	0.55	3.41e-25	8.81e-24	-0.573	0.000364	0.136
ONC0004383	HER2 Inhibitor 1	NA	NA	NA	NA	NA	1.24	0.67	0.95	0.35	0.44	0.36	0.953	0.285	0.383	0.0493	0.292	0.741	3.33e-21	7.96e-20	-0.57	0.0351	0.444
ONC0004908	Amuvatinib (MP-470)	NA	NA	NA	NA	NA	0.69	1.09	0.93	0.28	0.4	0.32	0.903	0.201	0.333	0.0611	0.152	0.577	1.67e-24	4.24e-23	-0.57	0.0152	0.342
ONC0003029	GNF-7	Preclinical	glucokinase inhibitor|protein kinase inhibitor	GCK|TNK2			0.98	1	0.8	0.28	0.36	0.44	0.927	0.11	0.36	0.08	0.21	0.668	1.03e-22	2.5e-21	-0.567	0.00138	0.154
ONC0001380	Ilginatinib hydrochloride	NA	NA	NA	NA	NA	1.04	1.7	1.11	0.65	0.73	0.77	1283	0.363	0.717	0.0611	0.996	1	1.1e-05	0.00012	-0.567	0.0549	0.532
ONC0004319	SGC-CBP30	Preclinical	bromodomain inhibitor	CREBBP|EP300			0.97	0.86	1.11	0.44	0.43	0.4	0.98	0.125	0.423	0.0208	0.385	0.789	9.54e-19	2.03e-17	-0.557	0.00726	0.282
ONC0005144	PD168393	Preclinical	EGFR inhibitor	EGFR|ERBB2|SRC			0.78	0.99	0.7	0.19	0.48	0.13	0.823	0.15	0.267	0.187	0.0359	0.264	2.67e-29	8.08e-28	-0.557	0.00869	0.293
ONC0005005	RAF265 (CHIR-265)	NA	NA	NA	NA	NA	1.49	1.19	1.67	0.97	0.68	1.04	1.45	0.242	0.897	0.191	1	1	0.0706	0.343	-0.553	0.0194	0.37
ONC0004656	TG101209	Preclinical	JAK inhibitor	JAK2|JAK3			0.93	0.95	1.02	0.39	0.34	0.51	0.967	0.0473	0.413	0.0874	0.337	0.769	2.4e-19	5.18e-18	-0.553	0.00106	0.153
ONC0002613	L-168049	Preclinical	glucagon receptor antagonist	GCGR			1.17	0.83	1.14	0.53	0.53	0.42	1047	0.188	0.493	0.0635	0.637	0.909	7.69e-15	1.39e-13	-0.553	0.0133	0.321
ONC0001698	SB-243213	Phase 1	serotonin receptor inverse agonist	HTR2A|HTR2B|HTR2C|HTR6			1.09	1	1.07	0.47	0.57	0.46	1053	0.0473	0.5	0.0608	0.661	0.916	1.71e-14	3e-13	-0.553	0.000169	0.119
ONC0002673	A-784168	Preclinical	transient receptor potential channel antagonist	TRPV1			0.89	0.94	1.32	0.49	0.53	0.49	1.05	0.235	0.503	0.0231	0.649	0.915	2.53e-14	4.43e-13	-0.547	0.0276	0.407
ONC0003340	MANNITOL	NA	NA	NA	NA	NA	1.46	1.44	1.11	0.71	0.77	0.89	1337	0.197	0.79	0.0917	0.999	1	0.000922	0.00813	-0.547	0.0125	0.318
ONC0003574	KRCA-0008	Preclinical	ALK inihibitor	ALK			1	0.94	1.1	0.49	0.49	0.44	1013	0.0808	0.473	0.0289	0.512	0.856	6.62e-16	1.25e-14	-0.54	0.00179	0.165
ONC0001967	Ledipasvir	Launched	HCV inhibitor		infectious disease	hepatitis C	0.95	0.73	0.84	0.2	0.33	0.37	0.84	0.11	0.3	0.0889	0.0505	0.324	7.61e-27	2.08e-25	-0.54	0.00158	0.156
ONC0005274	AZD8330	Phase 1	MEK inhibitor	MAP3K1			0.7	0.78	0.94	0.17	0.23	0.41	0.807	0.122	0.27	0.125	0.025	0.207	4.75e-29	1.42e-27	-0.537	0.00301	0.198
ONC0002671	cisapride	Withdrawn	serotonin receptor agonist	HTR2A|HTR3A|HTR4|KCNH2			1.17	1.15	1.11	0.61	0.64	0.57	1143	0.0306	0.607	0.0351	0.9	0.998	1.44e-09	2.09e-08	-0.537	2.14e-05	0.0897
ONC0001004	E 2012	NA	NA	NA	NA	NA	1.01	1.08	0.97	0.52	0.47	0.46	1.02	0.0557	0.483	0.0321	0.537	0.863	2.28e-15	4.23e-14	-0.537	0.000252	0.119
ONC0004526	YM201636	Preclinical	PI3K inhibitor				0.91	1.3	0.89	0.27	0.64	0.6	1033	0.231	0.503	0.203	0.588	0.885	2.53e-14	4.43e-13	-0.53	0.0207	0.37
ONC0004464	SR-3576	Preclinical	JNK inhibitor	MAPK10			1.6	1.33	0.74	0.69	0.81	0.58	1223	0.44	0.693	0.115	0.98	1	2.08e-06	2.41e-05	-0.53	0.0827	0.587
ONC0000994	URMC-099	Preclinical	mixed lineage kinase inhibitor	CDKL2|DAPK3|FLT3|LRRK2|MAP3K10|MAP3K11|MAP3K2|MAP3K9|SRPK2			1.15	0.93	0.99	0.54	0.49	0.45	1023	0.114	0.493	0.0451	0.55	0.868	7.69e-15	1.39e-13	-0.53	0.00388	0.23
ONC0004502	Erlotinib(OSI-744)	NA	NA	NA	NA	NA	1.13	1.38	1.09	0.52	0.67	0.83	1.2	0.157	0.673	0.155	0.966	1	4.52e-07	5.48e-06	-0.527	0.00724	0.282
ONC0002037	Capadenoson	Phase 2	adenosine receptor agonist	ADORA1			0.76	1.27	0.77	0.39	0.42	0.41	0.933	0.292	0.407	0.0153	0.229	0.688	9.46e-20	2.09e-18	-0.527	0.0442	0.493
ONC0002952	prenylamine	Withdrawn	calcium channel blocker				1.16	1.76	1.46	0.92	0.89	0.99	1.46	0.3	0.933	0.0513	1	1	0.182	0.63	-0.527	0.0446	0.493
ONC0005034	AG-1478 (Tyrphostin AG-1478)	NA	NA	NA	NA	NA	1.31	1.53	1.01	0.84	0.71	0.73	1283	0.261	0.76	0.07	0.996	1	0.000174	0.00168	-0.523	0.0326	0.427
ONC0001489	YM-90709	Preclinical	IL5 inhibitor	CSF2RB|IL5RA			0.74	1.16	0.96	0.53	0.44	0.32	0.953	0.21	0.43	0.105	0.292	0.741	2.36e-18	4.94e-17	-0.523	0.0159	0.349
ONC0002481	PF-431396	Preclinical	focal adhesion kinase inhibitor	PTK2|PTK2B			0.75	0.98	1.14	0.55	0.43	0.33	0.957	0.196	0.437	0.11	0.303	0.751	5.78e-18	1.18e-16	-0.52	0.0127	0.318
ONC0001261	Mps-BAY-2a	Preclinical	monopolar spindle 1 kinase inhibitor	TTK			0.8	0.92	1.07	0.44	0.34	0.45	0.93	0.135	0.41	0.0608	0.22	0.682	1.51e-19	3.29e-18	-0.52	0.00558	0.26
ONC0004332	TAK-285	Phase 1	EGFR inhibitor	ERBB2			1.09	1.21	1.5	0.78	0.72	0.76	1267	0.211	0.753	0.0306	0.993	1	0.000117	0.00115	-0.513	0.0246	0.394
ONC0004610	Lapatinib (GW-572016) Ditosylate	NA	NA	NA	NA	NA	0.89	1.12	0.68	0.32	0.37	0.47	0.897	0.22	0.387	0.0764	0.137	0.55	5.42e-21	1.28e-19	-0.51	0.0223	0.379
ONC0000227	HKI-357	Phase 1	EGFR inhibitor	EGFR			1.11	0.94	1.11	0.51	0.64	0.48	1053	0.0981	0.543	0.085	0.661	0.916	2.35e-12	3.81e-11	-0.51	0.00131	0.154
ONC0001097	KHK-IN-1 (hydrochloride)	NA	NA	NA	NA	NA	1.03	1.01	1.08	0.56	0.54	0.49	1.04	0.0361	0.53	0.0361	0.613	0.897	5.42e-13	8.92e-12	-0.51	3.26e-05	0.0897
ONC0004203	CANDESARTAN	Launched	angiotensin receptor antagonist	AGTR1	cardiology	hypertension|congestive heart failure	1.32	1.25	1.74	0.86	1.07	0.86	1437	0.265	0.93	0.121	1	1	0.169	0.607	-0.507	0.0312	0.42
ONC0002529	A-1070722	Preclinical	glycogen synthase kinase inhibitor	GSK3A|GSK3B			1.05	0.77	1.01	0.52	0.58	0.21	0.943	0.151	0.437	0.199	0.26	0.717	5.78e-18	1.18e-16	-0.507	0.0137	0.326
ONC0002409	Ozanimod	Phase 3	sphingosine 1-phosphate receptor agonist	S1PR1			0.98	1.24	1.04	0.58	0.55	0.61	1087	0.136	0.58	0.03	0.769	0.954	1.08e-10	1.63e-09	-0.507	0.00964	0.295
ONC0001389	GS-6201	Phase 1	adenosine receptor antagonist	ADORA1|ADORA2A|ADORA2B|ADORA3			1.28	1.19	1.04	0.61	0.52	0.86	1.17	0.121	0.663	0.176	0.938	1	2.04e-07	2.56e-06	-0.507	0.00943	0.295
ONC0001361	ZM-323881	Preclinical	VEGFR inhibitor	KDR			0.9	0.96	1.35	0.44	0.59	0.66	1.07	0.244	0.563	0.112	0.717	0.938	1.97e-11	3.06e-10	-0.507	0.0258	0.397
ONC0001434	SB-228357	Preclinical	serotonin receptor antagonist	HTR2A|HTR2B|HTR2C			1.08	0.85	0.59	0.41	0.38	0.21	0.84	0.245	0.333	0.108	0.0505	0.324	1.67e-24	4.24e-23	-0.507	0.0264	0.4
ONC0000069	AZ-628	Preclinical	RAF inhibitor	BRAF|RAF1			0.7	0.97	0.61	0.31	0.22	0.23	0.76	0.187	0.253	0.0493	0.00797	0.0869	2.59e-30	8.04e-29	-0.507	0.0177	0.356
ONC0001721	SB-334867	Preclinical	orexin receptor antagonist	HCRTR1|HCRTR2			0.94	0.94	0.72	0.38	0.37	0.33	0.867	0.127	0.36	0.0265	0.0834	0.429	1.03e-22	2.5e-21	-0.507	0.0085	0.293
ONC0005160	BMS-833923 (XL139)	NA	NA	NA	NA	NA	1.26	1.03	1.11	0.54	0.59	0.76	1133	0.117	0.63	0.115	0.882	0.993	1.21e-08	1.63e-07	-0.503	0.00302	0.198
ONC0002896	PERHEXILINE MALEATE	NA	NA	NA	NA	NA	1.73	1.34	1.04	0.8	1.07	0.73	1.37	0.346	0.867	0.18	1	1	0.0266	0.161	-0.503	0.0556	0.532
ONC0001643	WYE-687	Preclinical	mTOR inhibitor	MTOR			0.65	0.9	0.88	0.3	0.26	0.36	0.81	0.139	0.307	0.0503	0.0269	0.219	2.29e-26	6.13e-25	-0.503	0.00782	0.288
ONC0004473	altanserin	Phase 2	serotonin receptor antagonist	HTR2A			1.45	1.26	1.52	0.95	0.95	0.83	1.41	0.135	0.91	0.0693	1	1	0.103	0.446	-0.5	0.00534	0.253
ONC0004448	Lonafarnib (SCH66336)	NA	NA	NA	NA	NA	1.06	0.97	0.86	0.5	0.36	0.53	0.963	0.1	0.463	0.0907	0.326	0.763	1.87e-16	3.59e-15	-0.5	0.00157	0.156
ONC0003517	Tryptanthrin	Preclinical	cyclooxygenase inhibitor	IDO1			0.91	1.24	1.04	0.58	0.47	0.64	1063	0.166	0.563	0.0862	0.695	0.93	1.97e-11	3.06e-10	-0.5	0.00949	0.295
ONC0003775	BIBU-1361	Preclinical	EGFR inhibitor	EGFR			1.01	0.92	1.12	0.55	0.47	0.54	1017	0.1	0.52	0.0436	0.525	0.861	1.75e-13	2.95e-12	-0.497	0.00296	0.198
ONC0005097	NVP-BSK805 2HCl	NA	NA	NA	NA	NA	1.53	1.27	1.41	0.89	0.95	0.88	1403	0.13	0.907	0.0379	1	1	0.0939	0.419	-0.497	0.00803	0.29
ONC0000908	Eupatilin	Launched	mucus protecting agent				1.12	1.59	1.29	1	0.59	0.94	1333	0.238	0.843	0.221	0.999	1	0.0109	0.0753	-0.49	0.0298	0.417
ONC0000189	GNF-2	Preclinical	Bcr-Abl kinase inhibitor	ABL1|BCR			1.18	1.05	1.16	0.74	0.64	0.55	1.13	0.07	0.643	0.095	0.876	0.99	3.86e-08	5.08e-07	-0.487	0.00139	0.154
ONC0002390	TERCONAZOLE	Launched	sterol demethylase inhibitor		infectious disease	vulvovaginal candidiasis	1.43	1.26	1.52	0.79	0.95	1.01	1403	0.132	0.917	0.114	1	1	0.122	0.499	-0.487	0.00444	0.238
ONC0003093	T-5601640	Preclinical	LIM kinase inhibitor	LIMK2			0.98	1	0.89	0.55	0.48	0.38	0.957	0.0586	0.47	0.0854	0.303	0.751	4.36e-16	8.23e-15	-0.487	0.00103	0.153
ONC0001229	BVT 2733	NA	NA	NA	NA	NA	1.53	1.18	1.11	0.72	0.83	0.81	1273	0.225	0.787	0.0586	0.994	1	0.000774	0.00688	-0.487	0.0282	0.408
ONC0005078	SNX-2112	Phase 1	HSP inhibitor				0.46	0.52	0.74	0.21	0.05	0.03	0.573	0.147	0.097	0.0987	1.29e-05	0.000302	1.37e-43	1.01e-41	-0.477	0.00663	0.275
ONC0005012	R406(free base)	NA	NA	NA	NA	NA	1.06	1.2	1.47	0.77	0.8	0.73	1243	0.208	0.767	0.0351	0.988	1	0.000257	0.00241	-0.477	0.0273	0.406
ONC0002845	FLOXURIDINE	Launched	DNA synthesis inhibitor	TYMS	oncology	colorectal cancer	1.06	1	1.1	0.55	0.66	0.52	1053	0.0503	0.577	0.0737	0.661	0.916	7.74e-11	1.17e-09	-0.477	0.000671	0.151
ONC0004591	BX-795	Preclinical	IKK inhibitor	CDK2|CHEK1|GSK3B|KDR|PDK1|PDPK1			1.04	1.26	1.27	0.67	0.79	0.69	1.19	0.13	0.717	0.0643	0.958	1	1.1e-05	0.00012	-0.473	0.00587	0.26
ONC0002585	RS-67506	Preclinical	serotonin receptor partial agonist	HTR4			1.52	1.18	1.3	0.6	0.99	0.99	1333	0.172	0.86	0.225	0.999	1	0.0209	0.132	-0.473	0.0241	0.391
ONC0000136	tosedostat	Phase 2	peptidase inhibitor	ANPEP|LAP3|NPEPPS			0.5	0.58	0.84	0.15	0.2	0.16	0.64	0.178	0.17	0.0265	0.000181	0.0035	4.61e-37	2.09e-35	-0.47	0.0209	0.37
ONC0000804	Litronesib	Phase 2	kinesin-like spindle protein inhibitor	KIF11			0.5	0.53	0.73	0.11	0.14	0.1	0.587	0.125	0.117	0.0208	2.26e-05	0.00051	9.35e-42	5.92e-40	-0.47	0.0102	0.296
ONC0000753	brefeldin-a	Preclinical	protein synthesis inhibitor	ARF1|CYTH2			0.28	0.2	0.36	-0.25	-0.16	-0.15	0.28	0.08	-0.187	0.0551	1.01e-12	5.09e-11	5.39e-74	3.03e-70	-0.467	0.000943	0.153
ONC0001476	L-741742	Preclinical	dopamine receptor antagonist	DRD3|DRD4|SCN1A|SCN3A			1.32	0.81	0.97	0.69	0.59	0.42	1033	0.261	0.567	0.137	0.588	0.885	2.79e-11	4.3e-10	-0.467	0.0353	0.445
ONC0001558	ZK-93426	Phase 1	benzodiazepine receptor antagonist	GABRA1|GABRA2|GABRA3|GABRA5			1.14	1.58	1.03	0.98	0.56	0.81	1.25	0.291	0.783	0.211	0.99	1	0.000648	0.00581	-0.467	0.0472	0.498
ONC0003115	decitabine	Launched	DNA methyltransferase inhibitor	DNMT1|DNMT3A	hematologic malignancy|hematology	myelodysplastic diseases (MDS)|anemia|chronic myeloid leukemia (CML)	0.92	1.02	1.07	0.55	0.55	0.51	1003	0.0764	0.537	0.0231	0.473	0.837	1.14e-12	1.86e-11	-0.467	0.00266	0.191
ONC0001908	VU0360172	Preclinical	glutamate receptor positive allosteric modulator	GRM5			0.99	1.02	0.79	0.48	0.56	0.36	0.933	0.125	0.467	0.101	0.229	0.688	2.86e-16	5.44e-15	-0.467	0.00411	0.23
ONC0000913	WIKI4	Preclinical	tankyrase inhibitor|WNT pathway inhibitor	TNKS2			0.99	1.28	1.22	0.72	0.77	0.6	1163	0.153	0.697	0.0874	0.93	1	2.66e-06	3.04e-05	-0.467	0.00858	0.293
ONC0004119	5-Fluoro-2'-deoxycytidine	NA	NA	NA	NA	NA	0.92	1.02	0.99	0.57	0.54	0.43	0.977	0.0513	0.513	0.0737	0.373	0.785	8.14e-14	1.39e-12	-0.463	0.000721	0.151
ONC0004878	Pralatrexate(Folotyn)	NA	NA	NA	NA	NA	0.97	1.16	1.11	0.6	0.68	0.57	1.08	0.0985	0.617	0.0569	0.749	0.947	3.64e-09	5.06e-08	-0.463	0.00236	0.184
ONC0004888	Pelitinib (EKB-569)	NA	NA	NA	NA	NA	0.97	0.85	1.24	0.5	0.61	0.56	1.02	0.2	0.557	0.0551	0.537	0.863	9.82e-12	1.56e-10	-0.463	0.0241	0.391
ONC0000789	CNX-2006	Preclinical	EGFR inhibitor	EGFR			0.88	0.47	0.71	0.11	0.31	0.25	0.687	0.206	0.223	0.103	0.000915	0.0145	1.16e-32	4.09e-31	-0.463	0.0206	0.37
ONC0000948	U-104	Phase 1/Phase 2	carbonic anhydrase inhibitor	CA1|CA12|CA2|CA9			0.96	1.53	1.36	0.75	0.61	1.1	1283	0.293	0.82	0.252	0.996	1	0.004	0.0316	-0.463	0.054	0.529
ONC0001716	GR-127935	Preclinical	serotonin receptor antagonist	HTR1A|HTR1B|HTR1D|HTR1E|HTR1F|HTR2A|HTR2B|HTR2C|HTR6			0.72	1.08	1	0.58	0.52	0.31	0.933	0.189	0.47	0.142	0.229	0.688	4.36e-16	8.23e-15	-0.463	0.0154	0.342
ONC0004937	Telatinib (BAY 57-9352)	NA	NA	NA	NA	NA	1	1.43	0.95	0.77	0.69	0.54	1127	0.264	0.667	0.117	0.869	0.988	2.66e-07	3.31e-06	-0.46	0.0386	0.467
ONC0001138	Enasidenib	Launched	isocitrate dehydrogenase inhibitor	IDH1	hematologic malignancy	acute myeloid leukemia (AML)	0.86	1.02	1.03	0.63	0.38	0.52	0.97	0.0954	0.51	0.125	0.349	0.774	5.53e-14	9.5e-13	-0.46	0.0043	0.235
ONC0003127	PFI-4	Preclinical	bromodomain inhibitor	BRPF1			0.98	0.99	1	0.54	0.48	0.57	0.99	0.01	0.53	0.0458	0.423	0.811	5.42e-13	8.92e-12	-0.46	0.00114	0.153
ONC0000201	SB-743921	Phase 1/Phase 2	kinesin-like spindle protein inhibitor	KIF11			0.55	0.5	0.53	0.1	-0.04	0.15	0.527	0.0252	0.07	0.0985	1.6e-06	4.08e-05	4.22e-46	3.83e-44	-0.457	0.00562	0.26
ONC0000884	NVP 231	NA	NA	NA	NA	NA	0.81	1.28	1.2	0.62	0.72	0.58	1097	0.251	0.64	0.0721	0.797	0.966	2.9e-08	3.84e-07	-0.457	0.0391	0.47
ONC0002541	tracazolate	Phase 2	GABA receptor modulator	GABRA1			1.13	0.92	1.38	0.81	0.66	0.6	1143	0.23	0.69	0.108	0.9	0.998	1.62e-06	1.89e-05	-0.453	0.0289	0.412
ONC0005233	CTEP (RO4956371)	NA	NA	NA	NA	NA	0.95	0.66	1.24	0.41	0.57	0.52	0.95	0.29	0.5	0.0819	0.281	0.736	1.71e-14	3e-13	-0.45	0.0529	0.523
ONC0005100	Baricitinib (LY3009104)	NA	NA	NA	NA	NA	2.11	1.23	1.41	1.17	1.07	1.16	1583	0.465	1133	0.0551	1	1	0.985	1	-0.45	0.117	0.63
ONC0004328	EPZ004777	Preclinical	histone lysine methyltransferase inhibitor	DOT1L			1.51	1.33	1.08	0.92	0.74	0.92	1307	0.216	0.86	0.104	0.998	1	0.0209	0.132	-0.447	0.0256	0.397
ONC0005023	XL888	Phase 1	HSP inhibitor				0.4	0.8	0.49	0.23	0.02	0.1	0.563	0.21	0.117	0.106	8.38e-06	0.000202	9.35e-42	5.92e-40	-0.447	0.0235	0.389
ONC0004955	Rutaecarpine (Rutecarpine)	NA	NA	NA	NA	NA	0.96	1.51	0.96	0.63	0.75	0.71	1143	0.318	0.697	0.0611	0.9	0.998	2.66e-06	3.04e-05	-0.447	0.0652	0.56
ONC0004578	LY2228820	Phase 2	p38 MAPK inhibitor	MAPK14			0.97	1.04	1.13	0.59	0.56	0.65	1047	0.0802	0.6	0.0458	0.637	0.909	7.65e-10	1.12e-08	-0.447	0.00143	0.154
ONC0002720	diphenyleneiodonium	Preclinical	nitric oxide synthase inhibitor	NOS2|NOS3			0.37	0.38	0.52	0.1	-0.1	-0.07	0.423	0.0839	-0.023	0.108	7.91e-09	2.53e-07	1.84e-55	6.09e-53	-0.447	0.00286	0.198
ONC0002990	bleomycetin	Launched	EGFR expression inhibitor				1	0.54	0.91	0.25	0.45	0.41	0.817	0.244	0.37	0.106	0.0311	0.239	4.66e-22	1.12e-20	-0.447	0.0348	0.441
ONC0003138	PD-158780	Preclinical	EGFR inhibitor	EGFR			1.07	0.95	1.04	0.52	0.62	0.59	1.02	0.0624	0.577	0.0513	0.537	0.863	7.74e-11	1.17e-09	-0.443	0.000409	0.136
ONC0001228	Arglabin	Launched	farnesyltransferase inhibitor	FNTA|NFKB1			1.21	1.2	1.57	0.94	0.87	0.84	1327	0.211	0.883	0.0513	0.999	1	0.0468	0.252	-0.443	0.0303	0.418
ONC0004726	SRT1720 HCl	NA	NA	NA	NA	NA	0.99	1.3	1.33	0.69	0.85	0.76	1207	0.188	0.767	0.0802	0.971	1	0.000257	0.00241	-0.44	0.0201	0.37
ONC0003122	THIOTEPA	Launched	cytochrome P450 inhibitor	CYP2B6|CYP3A4	oncology	breast cancer|ovarian cancer|bladder cancer	1.63	1	1.12	0.5	0.93	1	1.25	0.335	0.81	0.271	0.99	1	0.00251	0.0205	-0.44	0.0772	0.582
ONC0004600	Nintedanib (BIBF 1120)	NA	NA	NA	NA	NA	1.08	1.34	1.33	0.88	0.76	0.8	1.25	0.147	0.813	0.0611	0.99	1	0.00294	0.0238	-0.437	0.0115	0.315
ONC0001920	TP-003	Preclinical	GABA receptor inverse agonist	GABRA1|GABRA2|GABRA3|GABRA5			0.78	0.97	1.05	0.45	0.59	0.45	0.933	0.139	0.497	0.0808	0.229	0.688	1.15e-14	2.05e-13	-0.437	0.00772	0.286
ONC0002954	dimethisoquin	Launched	local anesthetic		neurology/psychiatry	local anesthetic	1.19	1.49	1.29	1.03	0.84	0.79	1323	0.153	0.887	0.127	0.999	1	0.0521	0.274	-0.437	0.0101	0.296
ONC0003535	CD-1530	Preclinical	retinoid receptor agonist	RARG			1.72	0.66	1.53	0.73	0.98	0.9	1303	0.565	0.87	0.128	0.998	1	0.0299	0.177	-0.433	0.157	0.669
ONC0000026	SB-202190	Preclinical	p38 MAPK inhibitor	AKT1|ALOX5|CHEK1|GSK3B|LCK|MAPK1|MAPK11|MAPK12|MAPK14|MAPK8|PRKCA|ROCK1|RPS6KB1|SGK1			0.86	0.94	1.02	0.58	0.47	0.47	0.94	0.08	0.507	0.0635	0.249	0.706	3.75e-14	6.51e-13	-0.433	0.00111	0.153
ONC0000924	UNC 0631	NA	NA	NA	NA	NA	1.2	1.4	1.58	1.11	0.8	0.97	1393	0.19	0.96	0.155	1	1	0.31	0.826	-0.433	0.0199	0.37
ONC0004577	CI-1033 (Canertinib)	NA	NA	NA	NA	NA	0.56	0.62	0.7	0.14	0.18	0.27	0.627	0.0702	0.197	0.0666	0.00011	0.00223	7.95e-35	3.2e-33	-0.43	0.000776	0.151
ONC0000166	GSK-3-inhibitor-IX	Preclinical	glycogen synthase kinase inhibitor|lipoxygenase inhibitor	GSK3A|GSK3B			1	1.13	1.01	0.72	0.69	0.44	1047	0.0723	0.617	0.154	0.637	0.909	3.64e-09	5.06e-08	-0.43	0.0123	0.318
ONC0001741	DMH4	Preclinical	VEGFR inhibitor	KDR			1.15	0.84	1.16	0.69	0.61	0.57	1.05	0.182	0.623	0.0611	0.649	0.915	6.67e-09	9.12e-08	-0.427	0.022	0.377
ONC0003595	YM-298198-desmethyl	Preclinical	glutamate receptor antagonist	GRM1			1.03	1.22	1.03	0.69	0.67	0.65	1093	0.11	0.67	0.02	0.788	0.963	3.47e-07	4.26e-06	-0.423	0.00947	0.295
ONC0004874	Ivabradine HCl (Procoralan)	NA	NA	NA	NA	NA	1.23	1.51	1.36	0.9	0.99	0.94	1367	0.14	0.943	0.0451	1	1	0.226	0.711	-0.423	0.0128	0.318
ONC0003553	BIBX-1382	Phase 1	EGFR inhibitor	EGFR|ERBB2			0.66	1.07	1.19	0.58	0.54	0.54	0.973	0.278	0.553	0.0231	0.361	0.778	6.9e-12	1.11e-10	-0.42	0.0596	0.543
ONC0002032	Azeliragon	Phase 3	RAGE receptor antagonist	AGER			1.12	0.99	1.44	0.77	0.79	0.73	1183	0.232	0.763	0.0306	0.952	1	0.000212	0.00202	-0.42	0.0428	0.487
ONC0004869	PHA-793887	Phase 1	CDK inhibitor	CDK1|CDK2|CDK4|CDK5|CDK7|CDK9			0.6	0.67	0.88	0.22	0.36	0.32	0.717	0.146	0.3	0.0721	0.00235	0.0329	7.61e-27	2.08e-25	-0.417	0.0112	0.311
ONC0002569	SD-208	Preclinical	TGF beta receptor inhibitor	TGFBR1			1.08	1	1	0.54	0.64	0.65	1027	0.0462	0.61	0.0608	0.563	0.874	1.97e-09	2.8e-08	-0.417	0.000486	0.151
ONC0001352	T-0901317	Preclinical	LXR agonist	NCOA1|NCOA2|NR1H2|NR1H3|NR1I2|RXRB			1.07	1.14	1.14	0.28	0.99	0.83	1117	0.0404	0.7	0.372	0.847	0.98	3.39e-06	3.85e-05	-0.417	0.0955	0.61
ONC0001541	SANT-2	Preclinical	smoothened receptor antagonist	SHH|SMO			0.83	0.9	1.02	0.33	0.6	0.57	0.917	0.0961	0.5	0.148	0.184	0.621	1.71e-14	3e-13	-0.417	0.0102	0.296
ONC0005359	N-METHYL (-)EPHEDRINE [1R,2S]	NA	NA	NA	NA	NA	1.46	1.39	1.54	1	1.13	1.01	1463	0.0751	1047	0.0723	1	1	0.799	1	-0.417	0.00115	0.153
ONC0004728	MLN8054	Phase 1	Aurora kinase inhibitor	AURKA			1.09	0.95	1.24	0.75	0.5	0.79	1093	0.145	0.68	0.157	0.788	0.963	7.59e-07	9.02e-06	-0.413	0.0145	0.332
ONC0003764	TCS-359	Preclinical	FLT3 inhibitor	FLT3			0.42	0.94	0.85	0.34	0.27	0.36	0.737	0.278	0.323	0.0473	0.00421	0.0528	3.41e-25	8.81e-24	-0.413	0.0598	0.543
ONC0001440	PI-103	Preclinical	mTOR inhibitor|PI3K inhibitor	MTOR|PIK3CA|PIK3CB|PIK3CD|PIK3CG|PRKDC			0.77	0.75	0.42	0.4	0.07	0.23	0.647	0.197	0.233	0.165	0.000231	0.0044	7.2e-32	2.39e-30	-0.413	0.0255	0.397
ONC0000695	MEFENAMIC ACID	NA	NA	NA	NA	NA	1.42	1.22	1.51	0.77	1.12	1.03	1383	0.148	0.973	0.182	1	1	0.386	0.893	-0.41	0.0205	0.37
ONC0002233	NMS-P715	Preclinical	protein kinase inhibitor				1.02	1.12	0.75	0.5	0.56	0.6	0.963	0.191	0.553	0.0503	0.326	0.763	6.9e-12	1.11e-10	-0.41	0.0287	0.412
ONC0002621	AZ3146	Preclinical	monopolar spindle 1 kinase inhibitor				1.06	1.12	0.88	0.58	0.56	0.69	1.02	0.125	0.61	0.07	0.537	0.863	1.97e-09	2.8e-08	-0.41	0.00704	0.281
ONC0001327	Mps1-IN-1	Preclinical	monopolar spindle 1 kinase inhibitor	TTK			1.36	1.09	1.24	0.75	0.83	0.88	1.23	0.135	0.82	0.0656	0.983	1	0.004	0.0316	-0.41	0.00976	0.296
ONC0000300	pyrintegrin	Preclinical	integrin signaling activator				0.98	0.93	0.49	0.38	0.37	0.42	0.8	0.27	0.39	0.0265	0.0214	0.186	8.79e-21	2.06e-19	-0.41	0.0588	0.541
ONC0000874	Cobimetinib	Launched	MEK inhibitor	MAP2K1	oncology	melanoma	0.7	0.95	0.87	0.36	0.58	0.35	0.84	0.128	0.43	0.13	0.0505	0.324	2.36e-18	4.94e-17	-0.41	0.0088	0.293
ONC0001926	Adarotene	Phase 1	retinoid receptor agonist	RARB|RARG			0.22	0.31	0.47	-0.21	-0.07	0.05	0.333	0.127	-0.077	0.13	3.53e-11	1.45e-09	3.27e-61	1.84e-58	-0.41	0.0087	0.293
ONC0005278	StemRegenin 1	NA	NA	NA	NA	NA	1.07	0.82	1.15	0.61	0.58	0.63	1013	0.172	0.607	0.0252	0.512	0.856	1.44e-09	2.09e-08	-0.407	0.0261	0.399
ONC0005075	Dacomitinib (PF299804, PF-00299804)	NA	NA	NA	NA	NA	0.67	0.43	0.56	0.18	0.17	0.09	0.553	0.12	0.147	0.0493	5.4e-06	0.000132	4.43e-39	2.42e-37	-0.407	0.00837	0.293
ONC0005101	MRS 2578	NA	NA	NA	NA	NA	1.07	1.59	1.79	1.17	1.07	0.99	1483	0.372	1077	0.0902	1	1	0.904	1	-0.407	0.0967	0.611
ONC0004950	Saracatinib (AZD0530)	NA	NA	NA	NA	NA	1.67	1.23	1.47	1.04	1.02	1.09	1457	0.22	1.05	0.0361	1	1	0.814	1	-0.407	0.0409	0.476
ONC0003054	PSNCBAM-1	Preclinical	cannabinoid receptor modulator	CNR1			1.04	0.99	1.03	0.44	0.71	0.69	1.02	0.0265	0.613	0.15	0.537	0.863	2.68e-09	3.77e-08	-0.407	0.0196	0.37
ONC0003795	piperacetazine	Launched	dopamine receptor antagonist		neurology/psychiatry	schizophrenia	1	1.01	1.66	0.88	0.82	0.76	1223	0.378	0.82	0.06	0.98	1	0.004	0.0316	-0.403	0.102	0.614
ONC0000019	PCI-29732	Preclinical	Bruton's tyrosine kinase (BTK) inhibitor	BTK			1.37	1.35	1.26	1.02	0.75	1	1327	0.0586	0.923	0.15	0.999	1	0.145	0.552	-0.403	0.0152	0.342
ONC0001826	Ulixertinib	NA	NA	NA	NA	NA	0.85	0.99	1.48	0.77	0.61	0.74	1107	0.331	0.707	0.085	0.823	0.974	5.46e-06	6.12e-05	-0.4	0.0823	0.586
ONC0004480	P276-00	Phase 2	CDK inhibitor	CDK1|CDK4|CDK9			1.19	1.3	1.3	0.89	0.89	0.82	1263	0.0635	0.867	0.0404	0.993	1	0.0266	0.161	-0.397	0.000837	0.152
ONC0005114	Etravirine (TMC125)	NA	NA	NA	NA	NA	1.01	1.01	0.96	0.52	0.75	0.52	0.993	0.0289	0.597	0.133	0.435	0.817	5.56e-10	8.2e-09	-0.397	0.0153	0.342
ONC0003916	VILAZODONE HYDROCHLORIDE	NA	NA	NA	NA	NA	0.98	0.98	1.23	0.5	0.76	0.74	1063	0.144	0.667	0.145	0.695	0.93	2.66e-07	3.31e-06	-0.397	0.0141	0.327
ONC0001372	SB-218078	Preclinical	CHK inhibitor	CHEK1			0.77	0.87	0.92	0.23	0.58	0.56	0.853	0.0764	0.457	0.197	0.0654	0.374	7.98e-17	1.55e-15	-0.397	0.029	0.412
ONC0001772	KS-176	Preclinical	BCRP inhibitor	ABCG2			0.69	1.02	0.73	0.46	0.34	0.45	0.813	0.18	0.417	0.0666	0.0289	0.227	3.81e-19	8.13e-18	-0.397	0.0244	0.391
ONC0001834	Frentizole	Phase 1	immunosuppressant				0.83	0.79	1.01	0.52	0.51	0.41	0.877	0.117	0.48	0.0608	0.0991	0.464	1.51e-15	2.82e-14	-0.397	0.00687	0.28
ONC0004348	BAM7	Preclinical	BAX activator	BAX			1.22	1.15	1.02	0.63	0.92	0.66	1.13	0.101	0.737	0.159	0.876	0.99	4.15e-05	0.00043	-0.393	0.015	0.34
ONC0003560	CGS-20625	Phase 1	benzodiazepine receptor agonist|GABA benzodiazepine site receptor partial agonist	GABRA1|GABRA2|GABRA3|GABRA4|GABRA5|GABRA6			1.49	1.25	1.42	1.03	1.05	0.9	1387	0.123	0.993	0.0814	1	1	0.507	0.957	-0.393	0.00697	0.28
ONC0001966	indoramin	Launched	adrenergic receptor antagonist	ADRA1A|ADRA1B|ADRA1D|ADRA2B|ADRA2C	urology|cardiology	benign prostatic hyperplasia (BPH)|hypertension	1.56	1	0.97	0.74	0.68	0.93	1177	0.332	0.783	0.131	0.946	1	0.000648	0.00581	-0.393	0.0831	0.587
ONC0003607	ZM-447439	Preclinical	Aurora kinase inhibitor	AURKA|AURKB			0.72	1.01	0.64	0.48	0.4	0.32	0.79	0.195	0.4	0.08	0.017	0.155	3.68e-20	8.37e-19	-0.39	0.029	0.412
ONC0000412	SR-1078	Preclinical	retinoid receptor agonist	RORA|RORC			1.07	0.82	0.77	0.48	0.55	0.46	0.887	0.161	0.497	0.0473	0.117	0.507	1.15e-14	2.05e-13	-0.39	0.0215	0.374
ONC0001658	etazolate	Phase 2	phosphodiesterase inhibitor	GABRB3|PDE4A			0.96	1.27	1.07	0.81	0.89	0.43	1.1	0.157	0.71	0.246	0.806	0.968	6.91e-06	7.73e-05	-0.39	0.0466	0.497
ONC0003166	ETHENZAMIDE	Launched	analgesic agent		neurology/psychiatry|endocrinology|otolaryngology	headache|fever|common cold	1.68	1.29	1.11	1.05	0.99	0.87	1.36	0.291	0.97	0.0917	1	1	0.366	0.877	-0.39	0.0682	0.565
ONC0001160	OAC2	Preclinical	Oct activator	POU5F1			1.51	0.94	1.93	1.12	1.1	0.99	1.46	0.497	1.07	0.07	1	1	0.885	1	-0.39	0.153	0.664
ONC0004379	KB-SRC-4	Preclinical	SRC inhibitor	SRC			0.9	1.23	0.86	0.61	0.66	0.56	0.997	0.203	0.61	0.05	0.448	0.825	1.97e-09	2.8e-08	-0.387	0.0367	0.455
ONC0004927	Imatinib Mesylate (STI571)	NA	NA	NA	NA	NA	1.16	1.23	0.98	0.74	0.73	0.74	1123	0.129	0.737	0.00577	0.862	0.986	4.15e-05	0.00043	-0.387	0.0175	0.353
ONC0004941	Neratinib (HKI-272)	NA	NA	NA	NA	NA	1.16	0.98	0.98	0.77	0.64	0.55	1.04	0.104	0.653	0.111	0.613	0.897	8.97e-08	1.15e-06	-0.387	0.00584	0.26
ONC0004479	NVP-BGT226	NA	NA	NA	NA	NA	0.67	0.37	0.54	0.21	0.18	0.03	0.527	0.15	0.14	0.0964	1.6e-06	4.08e-05	1.15e-39	6.4e-38	-0.387	0.0133	0.321
ONC0000779	Cot inhibitor-1	NA	NA	NA	NA	NA	1.58	0.92	1.31	1.01	0.81	0.83	1.27	0.332	0.883	0.11	0.994	1	0.0468	0.252	-0.387	0.0861	0.595
ONC0000106	BTT-3033	Preclinical	integrin inhibitor	ITGA2|ITGB1			1.07	1.15	1.11	0.74	0.76	0.67	1.11	0.04	0.723	0.0473	0.832	0.975	1.73e-05	0.000185	-0.387	0.000239	0.119
ONC0005619	deferoxamine-mesylate	Launched	chelating agent		hematology	acute iron intoxication|iron overload	0.95	0.93	1.13	0.6	0.46	0.79	1003	0.11	0.617	0.166	0.473	0.837	3.64e-09	5.06e-08	-0.387	0.0174	0.353
ONC0001220	Triflusal	Launched	cyclooxygenase inhibitor|platelet aggregation inhibitor|thromboxane synthase inhibitor	NFKB1|NOS2|PDE10A|PTGS1	neurology/psychiatry|cardiology	stroke|myocardial infarction|atrial fibrillation (AF)	1.15	1.11	1.41	0.85	0.78	0.88	1223	0.163	0.837	0.0513	0.98	1	0.0083	0.0596	-0.387	0.022	0.377
ONC0004486	SLV-319-(+/-)	Phase 2	cannabinoid receptor antagonist	CNR1|DRD2|HTR1A			1.65	1.59	0.9	1.05	0.98	0.96	1.38	0.417	0.997	0.0473	1	1	0.528	0.968	-0.383	0.126	0.632
ONC0004985	CH5424802	NA	NA	NA	NA	NA	1.5	1.07	1	0.87	0.8	0.75	1.19	0.271	0.807	0.0603	0.958	1	0.00214	0.0177	-0.383	0.0638	0.558
ONC0005138	CNX-774	Preclinical	Bruton's tyrosine kinase (BTK) inhibitor	BTK			1.2	1.27	0.94	0.67	0.8	0.79	1137	0.174	0.753	0.0723	0.888	0.995	0.000117	0.00115	-0.383	0.0232	0.387
ONC0001325	Olmutinib	Launched	Bruton's tyrosine kinase (BTK) inhibitor|EGFR inhibitor	BTK|EGFR	oncology	non-small cell lung cancer (NSCLC)	0.52	0.77	0.62	0.12	0.34	0.3	0.637	0.126	0.253	0.117	0.00016	0.00311	2.59e-30	8.04e-29	-0.383	0.00915	0.295
ONC0005590	lometrexol	Phase 2	glycinamide ribonucleotide formyltransferase inhibitor	GART			0.95	0.9	1.05	0.62	0.6	0.53	0.967	0.0764	0.583	0.0473	0.337	0.769	1.51e-10	2.26e-09	-0.383	0.00177	0.165
ONC0004359	SGX-523	Phase 1	hepatocyte growth factor receptor inhibitor	MET			1.21	1	1.58	0.95	0.74	0.96	1263	0.294	0.883	0.124	0.993	1	0.0468	0.252	-0.38	0.0706	0.567
ONC0002448	SPIRAMYCIN	Launched	bacterial 50S ribosomal subunit inhibitor		infectious disease	toxoplasmosis|soft tissue infection	1.73	1.12	1.44	1.06	1.08	1.01	1.43	0.305	1.05	0.0361	1	1	0.814	1	-0.38	0.081	0.584
ONC0000800	MRS-1220	Preclinical	adenosine receptor antagonist	ADORA2B|ADORA3			1.22	0.99	0.76	0.66	0.53	0.64	0.99	0.23	0.61	0.07	0.423	0.811	1.97e-09	2.8e-08	-0.38	0.0464	0.497
ONC0003289	Fluphenazine decanoate	NA	NA	NA	NA	NA	1.47	1.05	1.58	0.97	0.98	1.02	1367	0.28	0.99	0.0265	1	1	0.487	0.945	-0.377	0.0719	0.572
ONC0000028	CCMI	Preclinical	acetylcholine receptor allosteric modulator	CHRNA7			1.13	1.24	1.08	0.74	0.75	0.83	1.15	0.0819	0.773	0.0493	0.911	1	0.000375	0.00346	-0.377	0.0024	0.185
ONC0002088	Basimglurant	Phase 2	glutamate receptor antagonist	GRM5			0.88	0.69	1.03	0.49	0.47	0.51	0.867	0.17	0.49	0.02	0.0834	0.429	5.14e-15	9.37e-14	-0.377	0.03	0.417
ONC0001977	haloperidol-decanoate	Launched	psychoactive drug	DRD2|DRD3|DRD4|HTR2A	neurology/psychiatry	schizophrenia	1.33	0.91	1.49	0.92	0.71	0.97	1243	0.3	0.867	0.138	0.988	1	0.0266	0.161	-0.377	0.0742	0.58
ONC0004788	nalmefene hydrochloride	NA	NA	NA	NA	NA	1.26	1.59	1.27	1.05	1	0.95	1373	0.188	1	0.05	1	1	0.548	0.978	-0.373	0.0332	0.429
ONC0004195	Echinomycin	Phase 2	DNA intercalating agent				0.43	0.28	0.34	0	-0.04	-0.03	0.35	0.0755	-0.023	0.0208	1.02e-10	3.92e-09	1.84e-55	6.09e-53	-0.373	0.00465	0.24
ONC0004628	Ponatinib (AP24534)	NA	NA	NA	NA	NA	1.03	1.16	1.13	0.66	0.72	0.82	1107	0.0681	0.733	0.0808	0.823	0.974	3.34e-05	0.00035	-0.373	0.00198	0.172
ONC0004407	SB-408124	Preclinical	orexin receptor antagonist	HCRTR1|HCRTR2			1.09	1.33	0.95	0.64	0.84	0.77	1123	0.192	0.75	0.101	0.862	0.986	9.56e-05	0.000951	-0.373	0.029	0.412
ONC0004647	17-AAG (Tanespimycin)	NA	NA	NA	NA	NA	0.33	0.42	0.48	-0.06	0.06	0.11	0.41	0.0755	0.037	0.0874	3.72e-09	1.26e-07	2.43e-49	2.91e-47	-0.373	0.00265	0.191
ONC0003455	AM-630, Iodopravadoline	NA	NA	NA	NA	NA	0.99	1.27	1.12	0.68	0.74	0.84	1127	0.14	0.753	0.0808	0.869	0.988	0.000117	0.00115	-0.373	0.0124	0.318
ONC0001477	AMD-3465	Preclinical	CC chemokine receptor antagonist	CXCR4			1.64	1.33	1.22	0.97	0.98	1.12	1397	0.218	1023	0.0839	1	1	0.684	1	-0.373	0.0412	0.476
ONC0005448	AV-412 (free base)	NA	NA	NA	NA	NA	0.84	1.04	1.12	0.6	0.57	0.71	1	0.144	0.627	0.0737	0.461	0.831	8.99e-09	1.22e-07	-0.373	0.0143	0.329
ONC0004396	Pexmetinib (ARRY-614)	NA	NA	NA	NA	NA	0.97	1.12	1.02	0.69	0.66	0.65	1037	0.0764	0.667	0.0208	0.6	0.889	2.66e-07	3.31e-06	-0.37	0.0049	0.245
ONC0005089	Omecamtiv mecarbil (CK-1827452)	NA	NA	NA	NA	NA	0.93	1.68	1.75	1.09	1.12	1.04	1453	0.455	1083	0.0404	1	1	0.92	1	-0.37	0.147	0.653
ONC0003626	CW-008	Preclinical	PKA activator	PRKACA			0.9	0.99	0.8	0.57	0.55	0.46	0.897	0.095	0.527	0.0586	0.137	0.55	3.73e-13	6.19e-12	-0.37	0.00393	0.23
ONC0002393	CHLOROGUANIDE HYDROCHLORIDE	NA	NA	NA	NA	NA	1.58	1.25	0.98	0.86	0.85	0.99	1.27	0.3	0.9	0.0781	0.994	1	0.0779	0.368	-0.37	0.0799	0.583
ONC0001076	Osimertinib	Launched	EGFR inhibitor	EGFR	oncology	non-small cell lung cancer (NSCLC)	0.53	0.39	0.49	0.09	0.07	0.14	0.47	0.0721	0.1	0.0361	9.8e-08	2.75e-06	2.78e-43	1.98e-41	-0.37	0.00223	0.181
ONC0002040	Gilteritinib	Launched	FLT3 inhibitor	FLT3			0.92	1.15	1.19	0.72	0.66	0.77	1087	0.146	0.717	0.0551	0.769	0.954	1.1e-05	0.00012	-0.37	0.0175	0.353
ONC0004732	Curcumol	Phase 1	JAK inhibitor	JAK1|JAK2|JAK3			1.35	0.93	1.73	0.96	0.98	0.97	1337	0.4	0.97	0.01	0.999	1	0.366	0.877	-0.367	0.127	0.632
ONC0003746	VLX-600	Phase 1	antitumor agent|ubiquitin C-terminal hydrolase inhibitor	TP53|USP14			0.25	0.14	0.21	-0.14	-0.23	-0.13	0.2	0.0557	-0.167	0.0551	3.01e-15	2.1e-13	1.41e-71	2.64e-68	-0.367	0.000629	0.151
ONC0004363	EPZ005687	Preclinical	histone lysine methyltransferase inhibitor	EZH2			1.08	1.16	0.81	0.66	0.71	0.58	1017	0.183	0.65	0.0656	0.525	0.861	6.79e-08	8.83e-07	-0.367	0.0304	0.418
ONC0004424	Entrectinib (RXDX-101)	NA	NA	NA	NA	NA	1.31	1.11	1.31	0.87	1.06	0.7	1243	0.115	0.877	0.18	0.988	1	0.0376	0.214	-0.367	0.0252	0.397
ONC0005145	Entospletinib (GS-9973)	NA	NA	NA	NA	NA	0.99	1.01	0.97	0.68	0.61	0.58	0.99	0.02	0.623	0.0513	0.423	0.811	6.67e-09	9.12e-08	-0.367	0.00134	0.154
ONC0003694	Leu-Leu-OMeHCl	NA	NA	NA	NA	NA	1.36	1.39	1.52	1.13	0.99	1.05	1423	0.085	1057	0.0702	1	1	0.84	1	-0.367	0.00251	0.186
ONC0004293	c-Kit-IN-1	NA	NA	NA	NA	NA	0.81	1.18	0.97	0.29	0.74	0.83	0.987	0.186	0.62	0.289	0.41	0.805	4.93e-09	6.84e-08	-0.367	0.0753	0.58
ONC0002725	nemonapride	Launched	dopamine receptor antagonist	DRD2|DRD3|DRD4	neurology/psychiatry	schizophrenia	1.21	1.09	0.95	0.78	0.71	0.66	1083	0.13	0.717	0.0603	0.759	0.95	1.1e-05	0.00012	-0.367	0.0122	0.318
ONC0001531	BCTC	Preclinical	TRPV antagonist	TRPV1			1.22	0.95	1.13	0.81	0.63	0.76	1.1	0.137	0.733	0.0929	0.806	0.968	3.34e-05	0.00035	-0.367	0.0118	0.317
ONC0003081	fulvestrant	Launched	estrogen receptor antagonist	ESR1|ESR2|GPER1	oncology	breast cancer	1.03	0.92	1.17	0.64	0.81	0.57	1.04	0.125	0.673	0.123	0.613	0.897	4.52e-07	5.48e-06	-0.367	0.0113	0.311
ONC0004689	thioguanosine	NA	NA	NA	NA	NA	0.87	0.97	0.75	0.66	0.29	0.55	0.863	0.11	0.5	0.19	0.0785	0.415	1.71e-14	3e-13	-0.363	0.0297	0.416
ONC0004505	mesoridazine besylate	NA	NA	NA	NA	NA	0.88	1.48	1.21	0.94	0.95	0.59	1.19	0.3	0.827	0.205	0.958	1	0.0054	0.0411	-0.363	0.0841	0.591
ONC0002251	PD153035 (Hydrochloride)	NA	NA	NA	NA	NA	1.01	0.98	0.95	0.7	0.58	0.57	0.98	0.03	0.617	0.0723	0.385	0.789	3.64e-09	5.06e-08	-0.363	0.00304	0.198
ONC0000809	BMS-536924	Preclinical	IGF-1 inhibitor	AKT1|CCNE1|CDK2|CYP3A4|ERBB2|IGF1R|KDR|LCK|MAPK1|MET|PDGFRA|PDGFRB			0.78	0.95	1.08	0.56	0.7	0.46	0.937	0.15	0.573	0.121	0.239	0.699	5.52e-11	8.45e-10	-0.363	0.0166	0.353
ONC0003311	Etoposide phosphate	NA	NA	NA	NA	NA	1.22	1.52	1.05	0.98	0.95	0.77	1263	0.238	0.9	0.114	0.993	1	0.0779	0.368	-0.363	0.0505	0.514
ONC0005099	PF-5274857	Preclinical	smoothened receptor antagonist	SMO			1.36	1.5	1.35	0.85	1.17	1.11	1403	0.0839	1043	0.17	1	1	0.785	1	-0.36	0.024	0.391
ONC0001441	pirinixic-acid	Preclinical	PPAR receptor agonist	PPARA			0.97	1.14	1.29	0.84	0.43	1.05	1133	0.16	0.773	0.315	0.882	0.993	0.000375	0.00346	-0.36	0.0885	0.599
ONC0001916	BML-284	Preclinical	WNT agonist				0.28	0.61	0.47	0.17	0.09	0.02	0.453	0.166	0.093	0.0751	4.08e-08	1.2e-06	6.7e-44	5.17e-42	-0.36	0.0232	0.387
ONC0002905	alcuronium	Launched	muscle relaxant	CHRM1|CHRM2|CHRM3|CHRM4|CHRNA7	neurology/psychiatry	muscle relaxant	0.93	1.68	1.44	0.8	1.06	1.11	1.35	0.383	0.99	0.166	0.999	1	0.487	0.945	-0.36	0.12	0.63
ONC0004762	ITF2357 (Givinostat)	NA	NA	NA	NA	NA	0.68	0.88	0.67	0.27	0.33	0.56	0.743	0.118	0.387	0.153	0.00508	0.0604	5.42e-21	1.28e-19	-0.357	0.0181	0.361
ONC0004370	OSI-930	Phase 1	KIT inhibitor|VEGFR inhibitor	FLT1|KDR|KIT			1.09	1.06	1.2	0.72	0.85	0.71	1117	0.0737	0.76	0.0781	0.847	0.98	0.000174	0.00168	-0.357	0.00229	0.181
ONC0005080	Crenolanib (CP-868596)	NA	NA	NA	NA	NA	1.2	0.88	1.42	0.9	0.75	0.78	1167	0.272	0.81	0.0794	0.934	1	0.00251	0.0205	-0.357	0.071	0.569
ONC0004999	Palomid 529	NA	NA	NA	NA	NA	1.33	0.99	1.07	0.87	0.74	0.71	1.13	0.178	0.773	0.085	0.876	0.99	0.000375	0.00346	-0.357	0.0275	0.407
ONC0004148	oxprenolol	Launched	adrenergic receptor antagonist	ADRB1	cardiology	angina pectoris|hypertension|cardiac arrythmia	1.17	1.06	1.3	0.82	0.91	0.74	1177	0.12	0.823	0.085	0.946	1	0.00465	0.0361	-0.353	0.00879	0.293
ONC0004784	Almotriptan malate (Axert)	NA	NA	NA	NA	NA	1.59	1.51	0.94	0.96	0.99	1.03	1347	0.354	0.993	0.0351	0.999	1	0.507	0.957	-0.353	0.113	0.623
ONC0004166	OXYBUTYNIN CHLORIDE	NA	NA	NA	NA	NA	1.03	1.22	1.27	0.7	0.93	0.83	1173	0.127	0.82	0.115	0.942	1	0.004	0.0316	-0.353	0.0118	0.317
ONC0005175	Poziotinib (HM781-36B)	NA	NA	NA	NA	NA	0.57	0.63	0.72	0.46	0.17	0.23	0.64	0.0755	0.287	0.153	0.000181	0.0035	8.19e-28	2.29e-26	-0.353	0.0194	0.37
ONC0002566	aurora-a-inhibitor-i	Preclinical	Aurora kinase inhibitor	AURKA			0.99	0.85	1.18	0.7	0.66	0.6	1007	0.166	0.653	0.0503	0.486	0.843	8.97e-08	1.15e-06	-0.353	0.0279	0.408
ONC0002428	ORBIFLOXACIN	Launched	bacterial DNA gyrase inhibitor		infectious disease	urinary tract infections	1.79	1.17	1.01	0.77	1.06	1.08	1323	0.412	0.97	0.173	0.999	1	0.366	0.877	-0.353	0.137	0.644
ONC0002288	Vesatolimod	NA	NA	NA	NA	NA	1.41	1.18	1.41	1.13	1.09	0.72	1333	0.133	0.98	0.226	0.999	1	0.426	0.919	-0.353	0.0477	0.502
ONC0001103	LY2874455	Phase 1	FGFR antagonist	FGFR1|FGFR2|FGFR3|FGFR4|KDR			0.85	0.58	0.92	0.42	0.5	0.37	0.783	0.18	0.43	0.0656	0.0144	0.139	2.36e-18	4.94e-17	-0.353	0.0313	0.42
ONC0001107	Nazartinib	NA	NA	NA	NA	NA	0.73	0.59	0.43	0.39	0.13	0.17	0.583	0.15	0.23	0.14	1.96e-05	0.000448	3.93e-32	1.33e-30	-0.353	0.0205	0.37
ONC0002437	ALBENDAZOLE	Launched	tubulin polymerization inhibitor	TUBA1A|TUBB|TUBB4B	infectious disease	cystic hydatid disease|parenchymal neurocysticercosis	0.78	0.68	0.96	0.48	0.45	0.44	0.807	0.142	0.457	0.0208	0.025	0.207	7.98e-17	1.55e-15	-0.35	0.024	0.391
ONC0005511	TROXERUTIN	Launched	antioxidant				1.29	1.06	1.64	1	1.01	0.93	1.33	0.292	0.98	0.0436	0.999	1	0.426	0.919	-0.35	0.0855	0.594
ONC0003089	CHROMOCARB	Launched	antispasmodic				1.52	1.22	1.28	0.88	0.98	1.11	1.34	0.159	0.99	0.115	0.999	1	0.487	0.945	-0.35	0.0207	0.37
ONC0001860	Apilimod	NA	NA	NA	NA	NA	0.68	0.39	0.2	-0.01	0.09	0.14	0.423	0.242	0.073	0.0764	7.91e-09	2.53e-07	8.77e-46	7.72e-44	-0.35	0.0592	0.541
ONC0005408	butofilolol	Phase 2	adrenergic receptor antagonist				1.62	1.11	1.02	0.94	0.76	1	1.25	0.324	0.9	0.125	0.99	1	0.0779	0.368	-0.35	0.0967	0.611
ONC0004939	Halofuginone	Launched	collagenase inhibitor	COL1A1|MMP2	rheumatology	scleroderma	0.28	0.3	0.64	0.06	0.08	0.04	0.407	0.202	0.06	0.02	3.07e-09	1.05e-07	4.63e-47	4.42e-45	-0.347	0.0479	0.503
ONC0003046	JHW-007	Preclinical	dopamine reuptake inhibitor	SLC6A3			1.3	1.27	1.27	0.79	1.05	0.96	1.28	0.0173	0.933	0.132	0.995	1	0.182	0.63	-0.347	0.0215	0.374
ONC0002712	tetrindole	Phase 3	monoamine oxidase inhibitor	MAOA			1.18	1.36	1.39	1.06	0.83	1	1.31	0.114	0.963	0.119	0.998	1	0.329	0.839	-0.347	0.011	0.309
ONC0000765	aminopurvalanol-a	Preclinical	CDK inhibitor|tyrosine kinase inhibitor	CDK1|CDK2|CDK5			0.82	0.88	1.07	0.54	0.62	0.57	0.923	0.131	0.577	0.0404	0.201	0.653	7.74e-11	1.17e-09	-0.347	0.0174	0.353
ONC0002461	TANNIC ACID	NA	NA	NA	NA	NA	1.24	1.25	1.15	0.88	0.75	0.97	1213	0.0551	0.867	0.111	0.975	1	0.0266	0.161	-0.347	0.00876	0.293
ONC0001611	BINA	Preclinical	glutamate receptor positive allosteric modulator	GRM2			0.9	1.05	1.11	0.7	0.75	0.57	1.02	0.108	0.673	0.0929	0.537	0.863	4.52e-07	5.48e-06	-0.347	0.00712	0.282
ONC0001422	rimcazole	Phase 1	sigma receptor antagonist	SIGMAR1			1.55	0.91	1.19	0.81	0.81	0.99	1217	0.321	0.87	0.104	0.977	1	0.0299	0.177	-0.347	0.0974	0.611
ONC0004779	L (+)-Rhamnose Monohydrate	NA	NA	NA	NA	NA	1	1.21	1.65	0.86	0.99	0.98	1287	0.332	0.943	0.0723	0.996	1	0.226	0.711	-0.343	0.105	0.616
ONC0005051	CHIR-124	Preclinical	CHK inhibitor	CHEK1			0.54	0.48	0.5	0.27	0.13	0.09	0.507	0.0306	0.163	0.0945	6.18e-07	1.62e-05	1.24e-37	6.06e-36	-0.343	0.00842	0.293
ONC0003647	INCB 3284	NA	NA	NA	NA	NA	1.25	1.16	1.37	0.82	0.78	1.15	1.26	0.105	0.917	0.203	0.992	1	0.122	0.499	-0.343	0.0402	0.472
ONC0003139	U-54494A	Preclinical	opioid receptor agonist	OPRK1			1.56	1	1.54	1.07	1.09	0.91	1367	0.318	1023	0.0987	1	1	0.684	1	-0.343	0.0975	0.611
ONC0003774	NS-8	Phase 2	potassium channel agonist	KCNMA1			1.57	1.27	1.22	0.98	1	1.06	1353	0.189	1013	0.0416	1	1	0.628	1	-0.34	0.0417	0.477
ONC0004856	WZ4002	Preclinical	EGFR inhibitor	EGFR|ERBB2			0.4	0.44	0.36	0.03	0.11	0.04	0.4	0.04	0.06	0.0436	2.09e-09	7.25e-08	4.63e-47	4.42e-45	-0.34	0.000297	0.129
ONC0003069	torin-2	Preclinical	mTOR inhibitor	MTOR			0.25	0.36	0.41	-0.16	0.03	0.13	0.34	0.0819	0	0.147	5.41e-11	2.15e-09	4.88e-53	9.82e-51	-0.34	0.0186	0.367
ONC0000807	VU0155069	Preclinical	phospholipase inhibitor	PLD1			0.95	0.99	0.92	0.58	0.6	0.66	0.953	0.0351	0.613	0.0416	0.292	0.741	2.68e-09	3.77e-08	-0.34	0.000241	0.119
ONC0003282	PROPOXUR	Launched			infectious disease	flea control	1.15	1.12	1.17	0.72	0.93	0.77	1147	0.0252	0.807	0.11	0.906	1	0.00214	0.0177	-0.34	0.014	0.327
ONC0000045	AZ-12080282	Preclinical	hedgehog pathway inhibitor	DHH			1.36	1.12	0.88	0.59	0.85	0.9	1.12	0.24	0.78	0.166	0.855	0.984	0.000541	0.00491	-0.34	0.0613	0.549
ONC0004499	A-803467	Preclinical	sodium channel blocker	SCN10A			0.91	0.75	1.32	0.67	0.69	0.61	0.993	0.294	0.657	0.0416	0.435	0.817	1.18e-07	1.5e-06	-0.337	0.0918	0.606
ONC0003557	TC-G-1008	Preclinical	G protein-coupled receptor agonist	GPR39			1	0.98	0.99	0.57	0.64	0.75	0.99	0.01	0.653	0.0907	0.423	0.811	8.97e-08	1.15e-06	-0.337	0.0111	0.311
ONC0004282	PND-1186	NA	NA	NA	NA	NA	0.75	0.86	0.6	0.22	0.42	0.56	0.737	0.131	0.4	0.171	0.00421	0.0528	3.68e-20	8.37e-19	-0.337	0.0287	0.412
ONC0002028	Defactinib	Phase 2	focal adhesion kinase inhibitor	PTK2			0.92	0.72	0.98	0.37	0.61	0.63	0.873	0.136	0.537	0.145	0.0936	0.451	1.14e-12	1.86e-11	-0.337	0.0214	0.374
ONC0001811	AMG-208	Phase 1	tyrosine kinase inhibitor	MET			0.87	1.24	1.05	0.6	0.59	0.96	1053	0.185	0.717	0.211	0.661	0.916	1.1e-05	0.00012	-0.337	0.0537	0.527
ONC0001957	Vinorelbine (ditartrate)	NA	NA	NA	NA	NA	0.39	0.41	0.46	0.12	0.04	0.09	0.42	0.0361	0.083	0.0404	6.56e-09	2.12e-07	7.76e-45	6.43e-43	-0.337	0.000226	0.119
ONC0004170	D-LACTITOL MONOHYDRATE	NA	NA	NA	NA	NA	1.25	1.7	1.19	1.02	1.03	1.09	1.38	0.279	1047	0.0379	1	1	0.799	1	-0.333	0.086	0.595
ONC0002818	OXETHAZAINE	Launched	local anesthetic		neurology/psychiatry	local anesthetic	1.35	1.28	1.46	0.9	1.17	1.02	1363	0.0907	1.03	0.135	1	1	0.72	1	-0.333	0.0149	0.34
ONC0005467	9-aminocamptothecin	Phase 2	topoisomerase inhibitor	TOP1			0.37	0.24	0.69	0.16	0.13	0.01	0.433	0.232	0.1	0.0794	1.38e-08	4.31e-07	2.78e-43	1.98e-41	-0.333	0.0592	0.541
ONC0005306	BUCETIN	Withdrawn	analgesic agent				1.2	1.22	1.51	0.93	1	1	1.31	0.173	0.977	0.0404	0.998	1	0.406	0.902	-0.333	0.0364	0.455
ONC0001715	VU-0364739	Preclinical	phospholipase inhibitor	PLD2			1.39	0.99	1.04	0.8	0.82	0.8	1.14	0.218	0.807	0.0115	0.894	0.998	0.00214	0.0177	-0.333	0.0587	0.541
ONC0005199	10-Hydroxycamptothecin	Preclinical	topoisomerase inhibitor	TOP1			0.43	0.47	0.64	0.17	0.18	0.2	0.513	0.112	0.183	0.0153	8.52e-07	2.21e-05	6.18e-36	2.62e-34	-0.33	0.017	0.353
ONC0004902	Cilomilast (SB-207499)	NA	NA	NA	NA	NA	0.96	1.38	1.42	1	0.92	0.85	1253	0.255	0.923	0.0751	0.99	1	0.145	0.552	-0.33	0.0727	0.575
ONC0002493	A-887826	Preclinical	sodium channel blocker	SCN10A			0.94	1	0.79	0.56	0.64	0.54	0.91	0.108	0.58	0.0529	0.167	0.597	1.08e-10	1.63e-09	-0.33	0.00953	0.295
ONC0004833	Dapivirine (TMC120)	NA	NA	NA	NA	NA	0.97	1.05	1.04	0.82	0.59	0.67	1.02	0.0436	0.693	0.117	0.537	0.863	2.08e-06	2.41e-05	-0.327	0.0141	0.327
ONC0005015	Tolvaptan (OPC-41061)	NA	NA	NA	NA	NA	1.58	0.85	1.08	0.7	0.84	0.99	1.17	0.373	0.843	0.145	0.938	1	0.0109	0.0753	-0.327	0.133	0.637
ONC0000247	2-PMDQ	Preclinical	adrenergic receptor antagonist	ADRA1A			1.22	1.24	1.42	0.99	0.93	0.98	1293	0.11	0.967	0.0321	0.997	1	0.347	0.857	-0.327	0.014	0.327
ONC0003171	GLAFENINE	Withdrawn	DeltaF508-CFTR Correctors	CFTR			1.05	1.16	0.89	0.7	0.7	0.72	1033	0.136	0.707	0.0115	0.588	0.885	5.46e-06	6.12e-05	-0.327	0.026	0.399
ONC0005295	PODOFILOX	NA	NA	NA	NA	NA	0.37	0.58	0.56	0.09	0.2	0.24	0.503	0.116	0.177	0.0777	5.25e-07	1.38e-05	1.7e-36	7.46e-35	-0.327	0.0101	0.296
ONC0001196	3PO	Preclinical	phosphofructokinase inhibitor	PFKFB3			1.51	1.04	1.55	0.99	0.99	1.14	1367	0.284	1.04	0.0866	1	1	0.769	1	-0.327	0.0882	0.597
ONC0005220	AZ 960	NA	NA	NA	NA	NA	0.64	0.75	0.88	0.35	0.47	0.48	0.757	0.12	0.433	0.0723	0.0073	0.0811	3.7e-18	7.6e-17	-0.323	0.0119	0.317
ONC0004110	ABAMECTIN (avermectin B1a shown)	NA	NA	NA	NA	NA	1.18	1.37	1.16	0.73	1	1.01	1237	0.116	0.913	0.159	0.985	1	0.112	0.472	-0.323	0.0258	0.397
ONC0004273	CLIMBAZOLE	Launched	enzyme inducer		dermatology	dandruff|eczema	1.33	0.98	1.46	0.96	0.88	0.96	1257	0.248	0.933	0.0462	0.991	1	0.182	0.63	-0.323	0.0743	0.58
ONC0002708	A-7	Preclinical	calmodulin antagonist				1.04	1.61	1.36	1.02	0.99	1.03	1337	0.286	1013	0.0208	0.999	1	0.628	1	-0.323	0.0942	0.606
ONC0000421	DESIPRAMINE HYDROCHLORIDE	NA	NA	NA	NA	NA	1.09	1.16	1.1	0.67	1.22	0.49	1117	0.0379	0.793	0.38	0.847	0.98	0.0011	0.0095	-0.323	0.139	0.649
ONC0004340	Azelnidipine	Launched	calcium channel blocker	CACNA1C	cardiology	hypertension	0.89	0.77	1.18	0.64	0.58	0.66	0.947	0.211	0.627	0.0416	0.27	0.728	8.99e-09	1.22e-07	-0.32	0.0571	0.538
ONC0005057	WAY-600	Preclinical	mTOR inhibitor	MTOR			1.19	0.98	1.07	0.74	0.81	0.73	1.08	0.105	0.76	0.0436	0.749	0.947	0.000174	0.00168	-0.32	0.0109	0.309
ONC0004437	Talazoparib (BMN 673)	NA	NA	NA	NA	NA	1.03	1	0.97	0.62	0.69	0.73	1	0.03	0.68	0.0557	0.461	0.831	7.59e-07	9.02e-06	-0.32	0.00143	0.154
ONC0000732	CY208-243	Phase 2	dopamine receptor agonist	CALY			1	1.17	1.28	0.65	0.78	1.06	1.15	0.141	0.83	0.21	0.911	1	0.00624	0.0466	-0.32	0.0514	0.517
ONC0003344	Vitamin B12	NA	NA	NA	NA	NA	1.61	1.55	0.96	1.09	1.07	1	1373	0.359	1053	0.0473	1	1	0.827	1	-0.32	0.131	0.633
ONC0002182	chlorindanol	Preclinical					1.12	1.37	1.2	0.8	1.02	0.92	1.23	0.128	0.913	0.11	0.983	1	0.112	0.472	-0.317	0.0161	0.349
ONC0000698	ATENOLOL
ONC0000757	Ixabepilone	Launched	microtubule stabilizing agent	TUBB	oncology	breast cancer	0.62	0.64	0.53	0.36	0.23	0.25	0.597	0.0586	0.28	0.07	3.4e-05	0.000737	2.64e-28	7.71e-27	-0.317	0.00213	0.176
ONC0000244	GNF-5	Preclinical	Bcr-Abl kinase inhibitor	ABL1|BCR			0.98	1.2	0.84	0.77	0.63	0.67	1007	0.181	0.69	0.0721	0.486	0.843	1.62e-06	1.89e-05	-0.317	0.0394	0.471
ONC0000390	bemesetron	Phase 3	serotonin receptor antagonist	HTR3A|HTR3B			0.92	1.15	1.27	0.9	0.79	0.7	1113	0.178	0.797	0.1	0.84	0.979	0.0013	0.0112	-0.317	0.0354	0.446
ONC0001436	indirubin-3-monoxime	Preclinical	CDK inhibitor|glycogen synthase kinase inhibitor	CDK1|CDK2|CDK5|CDK5R1|GSK3B			1.3	1.1	1.03	0.86	0.77	0.85	1143	0.14	0.827	0.0493	0.9	0.998	0.0054	0.0411	-0.317	0.0235	0.389
ONC0002094	Ceritinib	Launched	ALK tyrosine kinase receptor inhibitor	ALK|FLT3|IGF1R|INSR|TSSK1B	oncology	non-small cell lung cancer (NSCLC)	1.04	0.77	0.96	0.7	0.65	0.47	0.923	0.139	0.607	0.121	0.201	0.653	1.44e-09	2.09e-08	-0.317	0.0208	0.37
ONC0002013	Carbetocin	Launched	oxytocin receptor agonist	OXTR	hematology	hemorrhage	1.08	1.22	1.45	0.95	1.05	0.8	1.25	0.187	0.933	0.126	0.99	1	0.182	0.63	-0.317	0.0403	0.473
ONC0003542	cilnidipine	Launched	calcium channel blocker	CACNA1B	cardiology	hypertension	1.19	0.57	1.06	0.61	0.62	0.65	0.94	0.327	0.627	0.0208	0.249	0.706	8.99e-09	1.22e-07	-0.313	0.119	0.63
ONC0004636	Epirubicin Hydrochloride	NA	NA	NA	NA	NA	0.44	0.41	0.38	0.01	0.13	0.15	0.41	0.03	0.097	0.0757	3.72e-09	1.26e-07	1.37e-43	1.01e-41	-0.313	0.00524	0.252
ONC0000199	ANA-12	Preclinical	tropomyosin receptor kinase inhibitor	NTRK2			1.1	1.12	0.7	0.71	0.71	0.56	0.973	0.237	0.66	0.0866	0.361	0.778	1.55e-07	1.96e-06	-0.313	0.0687	0.565
ONC0001854	EPPTB	Preclinical	trace amine associated receptor antagonist	TAAR1			0.95	1.05	0.96	0.72	0.54	0.76	0.987	0.0551	0.673	0.117	0.41	0.805	4.52e-07	5.48e-06	-0.313	0.0138	0.326
ONC0005390	dithranol	Launched	DNA synthesis inhibitor		dermatology	psoriasis	1	1.36	1.59	1.06	0.99	0.96	1317	0.297	1003	0.0513	0.998	1	0.568	0.985	-0.313	0.103	0.614
ONC0004737	Belinostat (PXD101)	NA	NA	NA	NA	NA	0.59	0.76	0.82	0.22	0.52	0.5	0.723	0.119	0.413	0.168	0.00286	0.0383	2.4e-19	5.18e-18	-0.31	0.033	0.428
ONC0004821	Articaine HCl	NA	NA	NA	NA	NA	1.36	1.31	1	0.85	0.98	0.91	1223	0.195	0.913	0.0651	0.98	1	0.112	0.472	-0.31	0.0492	0.508
ONC0004814	TG003	Preclinical	CLK inhibitor	CLK1|CLK4|DYRK1A|DYRK1B			1.28	0.94	1.67	0.98	0.99	0.99	1297	0.365	0.987	0.00577	0.997	1	0.466	0.944	-0.31	0.14	0.649
ONC0004426	AMG319
ONC0003295	SODIUM OXYBATE	NA	NA	NA	NA	NA	1.13	1.22	1.25	0.89	0.89	0.89	1.2	0.0624	0.89	0	0.966	1	0.0578	0.295	-0.31	0.00663	0.275
ONC0000042	FRAX486	Preclinical	serine/threonine kinase inhibitor	PAK1|PAK2|PAK3|PAK4			1.09	1.34	0.97	0.81	0.8	0.86	1133	0.189	0.823	0.0321	0.882	0.993	0.00465	0.0361	-0.31	0.0503	0.512
ONC0001718	MRS1334	Preclinical	adenosine receptor antagonist	ADORA3			0.77	0.98	1.1	0.7	0.61	0.61	0.95	0.167	0.64	0.052	0.281	0.736	2.9e-08	3.84e-07	-0.31	0.0368	0.455
ONC0005453	5-hydroxyectoine	Preclinical					1.7	0.82	1.53	1.03	1.1	0.99	1.35	0.467	1.04	0.0557	0.999	1	0.769	1	-0.31	0.184	0.703
ONC0004909	Silodosin	Launched	adrenergic receptor antagonist	ADRA1A|ADRA1B|ADRA1D	urology	benign prostatic hyperplasia (BPH)	1.36	0.93	1.23	0.77	0.96	0.87	1173	0.221	0.867	0.095	0.942	1	0.0266	0.161	-0.307	0.0616	0.549
ONC0003848	dimercaptosuccinic-acid	Launched	chelating agent	DNMT1	neurology/psychiatry	metal toxicity	1.19	1.11	1.39	0.98	0.91	0.88	1.23	0.144	0.923	0.0513	0.983	1	0.145	0.552	-0.307	0.0267	0.401
ONC0005120	Selinexor (KPT-330)	NA	NA	NA	NA	NA	0.51	0.38	0.37	0.26	0.2	-0.12	0.42	0.0781	0.113	0.204	6.56e-09	2.12e-07	4.65e-42	3.08e-40	-0.307	0.0538	0.528
ONC0002674	L-732,138	Preclinical	tachykinin antagonist	TACR1|TACR2			1.48	1.27	0.8	1	0.78	0.85	1183	0.348	0.877	0.112	0.952	1	0.0376	0.214	-0.307	0.132	0.634
ONC0000265	sal003	Preclinical	eukaryotic translation initiation factor inhibitor	EIF2A			0.94	1.25	1.06	0.99	0.85	0.49	1083	0.156	0.777	0.258	0.759	0.95	0.000451	0.00413	-0.307	0.0841	0.591
ONC0001250	A12B4C3	Preclinical	polynucleotide kinase/phosphatase inhibitor	PNKP			1.1	1.29	1.2	0.83	0.79	1.05	1197	0.095	0.89	0.14	0.964	1	0.0578	0.295	-0.307	0.0208	0.37
ONC0000076	CF102	Phase 2	adenosine receptor agonist	ADORA1|ADORA2A|ADORA2B|ADORA3			0.79	1.88	1.31	1.03	1.01	1.02	1327	0.545	1.02	0.01	0.999	1	0.666	1	-0.307	0.216	0.727
ONC0001816	BRD-7389	Preclinical	ribosomal protein inhibitor	RPS6KA1|RPS6KA2|RPS6KA3			1.01	0.98	0.8	0.75	0.48	0.64	0.93	0.114	0.623	0.136	0.22	0.682	6.67e-09	9.12e-08	-0.307	0.0208	0.37
ONC0005339	MIANSERIN HYDROCHLORIDE	NA	NA	NA	NA	NA	1.28	1.42	1.25	0.97	0.95	1.11	1317	0.0907	1.01	0.0872	0.998	1	0.608	0.997	-0.307	0.00675	0.278
ONC0001190	Hexaminolevulinate (hydrochloride)	NA	NA	NA	NA	NA	1.24	1	1.28	0.87	0.92	0.81	1173	0.151	0.867	0.0551	0.942	1	0.0266	0.161	-0.307	0.0294	0.415
ONC0005090	LY2603618 (IC-83)	NA	NA	NA	NA	NA	0.41	0.27	0.27	0.07	-0.05	0.02	0.317	0.0808	0.013	0.0603	1.2e-11	5.26e-10	1.12e-51	1.97e-49	-0.303	0.004	0.23
ONC0004625	Bafetinib (INNO-406)	NA	NA	NA	NA	NA	0.91	0.65	1.17	0.54	0.52	0.76	0.91	0.26	0.607	0.133	0.167	0.597	1.44e-09	2.09e-08	-0.303	0.0852	0.594
ONC0000684	TOLAZAMIDE	Launched	ATP channel blocker	ABCC8|KCNJ1|KCNJ10|KCNJ11	endocrinology	diabetes mellitus	1.32	1.07	1.33	0.95	0.9	0.96	1.24	0.147	0.937	0.0321	0.987	1	0.196	0.658	-0.303	0.0322	0.426
ONC0000735	RGB-286638 (free base)	NA	NA	NA	NA	NA	0.33	0.42	0.44	0.21	0.02	0.05	0.397	0.0586	0.093	0.102	1.72e-09	6.08e-08	6.7e-44	5.17e-42	-0.303	0.00921	0.295
ONC0003485	Aphidicolin	Phase 1	RNA synthesis inhibitor				0.44	0.63	0.66	0.07	0.3	0.45	0.577	0.119	0.273	0.191	1.48e-05	0.000344	8.44e-29	2.5e-27	-0.303	0.0465	0.497
ONC0002813	Scopine	Launched					1	1.52	1.05	1.03	0.57	1.06	1.19	0.287	0.887	0.275	0.958	1	0.0521	0.274	-0.303	0.128	0.632
ONC0002804	parbendazole	Preclinical	tubulin polymerization inhibitor	TUBB			0.3	0.49	0.41	0.1	0.14	0.05	0.4	0.0954	0.097	0.0451	2.09e-09	7.25e-08	1.37e-43	1.01e-41	-0.303	0.00877	0.293
ONC0002109	Maribavir	Phase 3	cytomegalovirus inhibitor|protein kinase inhibitor	PYGM			1.32	1.51	1	1	0.89	1.03	1277	0.258	0.973	0.0737	0.995	1	0.386	0.893	-0.303	0.0855	0.594
ONC0004783	Droxinostat	Preclinical	HDAC inhibitor	HDAC6|HDAC8			0.94	1.08	1.65	0.98	0.89	0.9	1223	0.376	0.923	0.0493	0.98	1	0.145	0.552	-0.3	0.15	0.661
ONC0003730	Q-203	Phase 2	ATP synthase inhibitor				1.37	1.02	1.15	0.68	0.99	0.97	1.18	0.177	0.88	0.173	0.949	1	0.042	0.232	-0.3	0.052	0.521
ONC0004139	TEMOZOLOMIDE	Launched	DNA alkylating agent	MGMT	oncology	glioblastoma|astrocytoma	0.28	0.26	0.35	-0.02	0.02	-0.01	0.297	0.0473	-0.003	0.0208	3.16e-12	1.51e-10	2.22e-53	4.62e-51	-0.3	0.00151	0.154
ONC0004339	Erastin	Preclinical	ion channel antagonist	VDAC2			0.71	1.28	1.53	0.83	0.97	0.82	1173	0.42	0.873	0.0839	0.942	1	0.0336	0.195	-0.3	0.171	0.687
ONC0004315	Mdivi-1	Preclinical	dynamin inhibitor	DNM1			1.18	1.42	1.02	0.98	0.89	0.85	1207	0.201	0.907	0.0666	0.971	1	0.0939	0.419	-0.3	0.0558	0.532
ONC0005073	NPS-2143 (SB262470)	NA	NA	NA	NA	NA	1.38	1.33	1.19	0.94	0.99	1.07	1.3	0.0985	1	0.0656	0.997	1	0.548	0.978	-0.3	0.00798	0.29
ONC0004933	cx-4945 (Silmitasertib)	NA	NA	NA	NA	NA	1.15	1.39	1.43	1.15	0.89	1.03	1323	0.151	1023	0.13	0.999	1	0.684	1	-0.3	0.0306	0.418
ONC0004604	LY335979 (Zosuquidar trihydrochloride)	NA	NA	NA	NA	NA	1.2	1.68	1.07	0.97	1.06	1.02	1317	0.321	1017	0.0451	0.998	1	0.647	1	-0.3	0.123	0.63
ONC0001120	R112	Phase 1	SYK inhibitor	SYK			1.04	0.95	1	0.68	0.79	0.62	0.997	0.0451	0.697	0.0862	0.448	0.825	2.66e-06	3.04e-05	-0.3	0.00632	0.27
ONC0003362	Landiolol HCl	NA	NA	NA	NA	NA	0.99	1.26	1.05	0.76	0.89	0.76	1.1	0.142	0.803	0.0751	0.806	0.968	0.00181	0.0153	-0.297	0.0242	0.391
ONC0000746	Rimegepant	Launched	calcitonin antagonist	CALCA			1.27	1.51	1.18	0.99	1.1	0.98	1.32	0.171	1023	0.0666	0.999	1	0.684	1	-0.297	0.0399	0.471
ONC0002596	4-carboxy-3-hydroxyphenylglycine-(RS)	Preclinical	glutamate receptor agonist|glutamate receptor antagonist	GRM1			0.9	1.35	0.87	0.51	0.89	0.83	1.04	0.269	0.743	0.204	0.613	0.897	6.33e-05	0.000644	-0.297	0.104	0.614
ONC0001144	Omberacetam	NA	NA	NA	NA	NA	1.28	1.61	1.13	1.01	1.04	1.08	1.34	0.246	1043	0.0351	0.999	1	0.785	1	-0.297	0.0845	0.593
ONC0004777	WHI-P154	Preclinical	JAK inhibitor	EGFR|JAK1|JAK2|JAK3			0.9	1.56	0.82	0.75	0.8	0.85	1093	0.406	0.8	0.05	0.788	0.963	0.00154	0.0131	-0.293	0.169	0.687
ONC0004320	SGC 0946	NA	NA	NA	NA	NA	1.02	1.27	1.35	0.96	0.93	0.87	1213	0.172	0.92	0.0458	0.975	1	0.133	0.526	-0.293	0.0448	0.493
ONC0004929	Enzastaurin (LY317615)	NA	NA	NA	NA	NA	1.3	1.21	1.1	1.05	0.79	0.89	1203	0.1	0.91	0.131	0.969	1	0.103	0.446	-0.293	0.0202	0.37
ONC0000689	RITODRINE HYDROCHLORIDE	NA	NA	NA	NA	NA	0.85	0.97	0.98	0.38	0.58	0.96	0.933	0.0723	0.64	0.295	0.229	0.688	2.9e-08	3.84e-07	-0.293	0.111	0.622
ONC0000238	IKK-16	Preclinical	IKK inhibitor	IKBKB			1.2	0.99	1.3	0.93	0.88	0.8	1163	0.158	0.87	0.0656	0.93	1	0.0299	0.177	-0.293	0.0343	0.44
ONC0002695	TC-Mps1-12	Preclinical	monopolar spindle 1 kinase inhibitor	TTK			0.75	0.73	0.79	0.36	0.44	0.59	0.757	0.0306	0.463	0.117	0.0073	0.0811	1.87e-16	3.59e-15	-0.293	0.0207	0.37
ONC0001086	ON123300	Preclinical	CDK inhibitor	CDK4|NUAK1|PDGFRB			0.98	1.14	1.01	0.92	0.71	0.62	1043	0.085	0.75	0.154	0.625	0.903	9.56e-05	0.000951	-0.293	0.0301	0.417
ONC0001381	PD-407824	Preclinical	PKC inhibitor	WEE1			0.84	0.94	1.02	0.56	0.58	0.78	0.933	0.0902	0.64	0.122	0.229	0.688	2.9e-08	3.84e-07	-0.293	0.0161	0.349
ONC0003516	Plicamycin (Mithramycin)	NA	NA	NA	NA	NA	0.19	0.3	0.07	-0.1	-0.13	-0.09	0.187	0.115	-0.107	0.0208	1.08e-15	7.9e-14	1.42e-64	1.6e-61	-0.293	0.0219	0.377
ONC0002973	thaliblastine	Phase 2	DNA inhibitor				1.17	1.11	1.01	0.77	0.78	0.86	1097	0.0808	0.803	0.0493	0.797	0.966	0.00181	0.0153	-0.293	0.00491	0.245
ONC0004861	Tie2 kinase inhibitor	NA	NA	NA	NA	NA	0.75	1.24	0.94	0.64	0.7	0.72	0.977	0.247	0.687	0.0416	0.373	0.785	1.26e-06	1.48e-05	-0.29	0.088	0.597
ONC0003977	CLEMIZOLE HYDROCHLORIDE	NA	NA	NA	NA	NA	1.75	0.88	1.14	1	0.97	0.93	1257	0.447	0.967	0.0351	0.991	1	0.347	0.857	-0.29	0.189	0.705
ONC0005027	SGI-1027	Preclinical	DNA methyltransferase inhibitor	DNMT1|DNMT3A|DNMT3B			1.31	1.74	1.4	1.2	1.36	1.02	1483	0.227	1193	0.17	1	1	0.999	1	-0.29	0.0784	0.582
ONC0001124	UNC2025 (hydrochloride)	NA	NA	NA	NA	NA	0.7	0.75	0.72	0.38	0.4	0.52	0.723	0.0252	0.433	0.0757	0.00286	0.0383	3.7e-18	7.6e-17	-0.29	0.00731	0.282
ONC0005472	cibenzoline	Launched	sodium channel blocker		cardiology	cardiac arrythmia	1.3	1.36	0.99	1.1	0.72	0.96	1217	0.199	0.927	0.192	0.977	1	0.157	0.579	-0.29	0.0717	0.572
ONC0005559	budesonide	Launched	glucocorticoid receptor agonist	NR3C1	gastroenterology	Crohn's disease	1.03	1.12	1.22	0.98	0.74	0.78	1123	0.095	0.833	0.129	0.862	0.986	0.00721	0.0527	-0.29	0.0195	0.37
ONC0001051	Niraparib	Launched	PARP inhibitor	PARP1	oncology	primary peritoneal cancer (PPC)	1.11	1.44	0.97	0.78	0.89	0.98	1173	0.241	0.883	0.1	0.942	1	0.0468	0.252	-0.29	0.0808	0.584
ONC0001780	Tafamidis	NA	NA	NA	NA	NA	0.85	1.18	1.56	0.99	0.86	0.87	1197	0.355	0.907	0.0723	0.964	1	0.0939	0.419	-0.29	0.146	0.653
ONC0002311	PAROXETINE HYDROCHLORIDE	NA	NA	NA	NA	NA	1	1.01	1.35	0.8	0.89	0.81	1.12	0.199	0.833	0.0493	0.855	0.984	0.00721	0.0527	-0.287	0.0615	0.549
ONC0000902	Gemcitabine (elaidate)	NA	NA	NA	NA	NA	0.45	0.37	0.54	0.18	0.16	0.16	0.453	0.085	0.167	0.0115	4.08e-08	1.2e-06	2.39e-37	1.12e-35	-0.287	0.0132	0.321
ONC0001753	SANT-1	Preclinical	smoothened receptor antagonist	SHH|SMO			1.09	1.1	1.55	0.75	1.13	1	1247	0.263	0.96	0.193	0.989	1	0.31	0.826	-0.287	0.104	0.616
ONC0001231	Acalabrutinib	Launched	Bruton's tyrosine kinase (BTK) inhibitor	BTK	hematologic malignancy	mantle cell lymphoma (MCL)	1	1.34	1.07	1.14	0.76	0.65	1137	0.18	0.85	0.257	0.888	0.995	0.0143	0.0945	-0.287	0.0984	0.611
ONC0004838	Tipifarnib (Zarnestra)	NA	NA	NA	NA	NA	0.72	0.81	0.62	0.39	0.44	0.47	0.717	0.095	0.433	0.0404	0.00235	0.0329	3.7e-18	7.6e-17	-0.283	0.0112	0.311
ONC0004835	NSC319726	Preclinical	p53 activator				0.1	0.2	0.21	-0.25	-0.02	-0.07	0.17	0.0608	-0.113	0.121	2.93e-16	2.39e-14	2.46e-65	3.47e-62	-0.283	0.0186	0.367
ONC0004009	NITHIAMIDE	Preclinical	bacterial DNA inhibitor				1.2	1.06	1.36	0.97	0.95	0.85	1207	0.15	0.923	0.0643	0.971	1	0.145	0.552	-0.283	0.0327	0.427
ONC0004943	Biochanin A (4-Methylgenistein)	NA	NA	NA	NA	NA	1.19	1.11	1.26	0.94	0.96	0.81	1187	0.0751	0.903	0.0814	0.955	1	0.0856	0.393	-0.283	0.00579	0.26
ONC0005184	OTX015	Phase 1/Phase 2	bromodomain inhibitor	BRD2|BRD3|BRD4			0.53	0.52	0.56	0.32	0.34	0.1	0.537	0.0208	0.253	0.133	2.55e-06	6.37e-05	2.59e-30	8.04e-29	-0.283	0.0316	0.422
ONC0005150	ML347	Preclinical	ALK tyrosine kinase receptor inhibitor	ACVR1|ACVRL1|BMPR1A			0.95	1.39	1.14	0.94	0.78	0.91	1.16	0.221	0.877	0.085	0.925	1	0.0376	0.214	-0.283	0.0721	0.573
ONC0000252	cyclopiazonic-acid	Preclinical	ATPase inhibitor	ATP2A1			1.18	1.21	1.31	1	0.86	0.99	1233	0.0681	0.95	0.0781	0.984	1	0.258	0.761	-0.283	0.00474	0.243
ONC0001509	L-755507	Preclinical	adrenergic receptor agonist	ADRB1|ADRB2|ADRB3			1.35	1.02	1.21	0.71	0.89	1.13	1193	0.166	0.91	0.211	0.961	1	0.103	0.446	-0.283	0.0725	0.574
ONC0002797	Isopropyl myristate	NA	NA	NA	NA	NA	1.02	1.38	0.99	0.91	0.74	0.89	1.13	0.217	0.847	0.0929	0.876	0.99	0.0125	0.0846	-0.283	0.0694	0.565
ONC0003243	ANTHRALIN	Launched	DNA synthesis inhibitor		dermatology	psoriasis	0.84	1.47	1.21	1	0.88	0.79	1173	0.317	0.89	0.105	0.942	1	0.0578	0.295	-0.283	0.129	0.632
ONC0002062	TMC353121	Phase 2	RSV fusion inhibitor				0.7	0.9	0.74	0.58	0.49	0.42	0.78	0.106	0.497	0.0802	0.0133	0.131	1.15e-14	2.05e-13	-0.283	0.0118	0.317
ONC0004690	Pyridostigmine Bromide (Mestinon)	NA	NA	NA	NA	NA	1.14	0.98	1.18	0.77	0.72	0.97	1.1	0.106	0.82	0.132	0.806	0.968	0.004	0.0316	-0.28	0.0242	0.391
ONC0004086	QUINESTROL	Launched	estrogen receptor agonist	ESR1|ESR2	endocrinology	menopause	1.06	1.35	0.91	0.98	0.55	0.95	1107	0.224	0.827	0.24	0.823	0.974	0.0054	0.0411	-0.28	0.107	0.62
ONC0004058	FENCLONINE (+/-)	NA	NA	NA	NA	NA	0.89	1.03	1.28	0.44	1.18	0.74	1067	0.198	0.787	0.372	0.707	0.935	0.000774	0.00688	-0.28	0.166	0.684
ONC0004002	ZILEUTON	Launched	leukotriene synthesis inhibitor|lipoxygenase inhibitor	ALOX5	pulmonary	asthma	1.1	0.84	1.5	0.78	0.98	0.84	1147	0.332	0.867	0.103	0.906	1	0.0266	0.161	-0.28	0.14	0.649
ONC0005125	AZD3463	Preclinical	ALK tyrosine kinase receptor inhibitor|insulin growth factor receptor inhibitor	ALK|IGF1R			0.74	0.78	0.68	0.48	0.48	0.4	0.733	0.0503	0.453	0.0462	0.00383	0.0492	5.18e-17	1.02e-15	-0.28	0.00107	0.153
ONC0003925	TIOGUANINE	Launched	purine antagonist		hematologic malignancy	acute myeloid leukemia (AML)|acute lymphoblastic leukemia (ALL)|chronic myeloid leukemia (CML)	0.75	0.97	0.65	0.39	0.52	0.62	0.79	0.164	0.51	0.115	0.017	0.155	5.53e-14	9.5e-13	-0.28	0.0399	0.471
ONC0000710	AM-580	Preclinical	retinoid receptor agonist	RARA			1.26	1.26	1.42	0.98	1.09	1.03	1313	0.0924	1033	0.0551	0.998	1	0.737	1	-0.28	0.0085	0.293
ONC0000176	LMK-235	Preclinical	HDAC inhibitor	HDAC4|HDAC5			0.88	0.82	0.5	0.28	0.51	0.57	0.733	0.204	0.453	0.153	0.00383	0.0492	5.18e-17	1.02e-15	-0.28	0.0679	0.565
ONC0001486	AZM-475271	Preclinical	SRC inhibitor	SRC			0.94	1.39	1.45	0.91	0.99	1.04	1.26	0.279	0.98	0.0656	0.992	1	0.426	0.919	-0.28	0.11	0.622
ONC0001510	AZ-10417808	Preclinical	caspase inhibitor	CASP3			1.05	1.36	1.3	1.01	0.86	1	1237	0.164	0.957	0.0839	0.985	1	0.292	0.806	-0.28	0.0396	0.471
ONC0003232	ANTAZOLINE PHOSPHATE	NA	NA	NA	NA	NA	1.1	1.62	1.16	0.97	0.99	1.08	1293	0.284	1013	0.0586	0.997	1	0.628	1	-0.28	0.114	0.623
ONC0002768	D-alpha-Tocopheryl Succinate	NA	NA	NA	NA	NA	1.08	1.04	1.2	0.82	1.02	0.64	1107	0.0833	0.827	0.19	0.823	0.974	0.0054	0.0411	-0.28	0.0549	0.532
ONC0005455	medronic-acid	Launched	bone resorption inhibitor		radiology	skeletal imaging agent	1.02	0.99	1.62	0.98	0.82	0.99	1.21	0.355	0.93	0.0954	0.973	1	0.169	0.607	-0.28	0.152	0.664
ONC0004541	Go 6983	NA	NA	NA	NA	NA	0.98	0.94	0.92	0.71	0.89	0.41	0.947	0.0306	0.67	0.242	0.27	0.728	3.47e-07	4.26e-06	-0.277	0.0925	0.606
ONC0003544	oxfenicine	Phase 1	carnitine palmitoyltransferase inhibitor	CPT1A|CPT1B			0.68	1.27	1.14	0.74	0.66	0.86	1.03	0.31	0.753	0.101	0.575	0.879	0.000117	0.00115	-0.277	0.129	0.632
ONC0002897	CETRIMONIUM BROMIDE	NA	NA	NA	NA	NA	1.24	1.2	1.09	0.84	1.01	0.85	1177	0.0777	0.9	0.0954	0.946	1	0.0779	0.368	-0.277	0.0095	0.295
ONC0001817	FPL-64176	Preclinical	calcium channel activator	CACNA1C|CACNA1S			0.97	1.4	1.47	0.96	1.13	0.92	1.28	0.271	1003	0.112	0.995	1	0.568	0.985	-0.277	0.106	0.616
ONC0001158	Brivaracetam	NA	NA	NA	NA	NA	1.54	1.43	0.98	1.03	1.1	0.99	1317	0.297	1.04	0.0557	0.998	1	0.769	1	-0.277	0.123	0.63
ONC0004830	Butenafine HCl	NA	NA	NA	NA	NA	1.08	1.1	1.67	1.02	1.01	1	1283	0.335	1.01	0.01	0.996	1	0.608	0.997	-0.273	0.147	0.653
ONC0005228	Butein	Preclinical	EGFR inhibitor|SRC inhibitor	ACE			0.9	1.04	0.93	0.34	0.96	0.75	0.957	0.0737	0.683	0.315	0.303	0.751	9.81e-07	1.16e-05	-0.273	0.135	0.641
ONC0004380	Pacritinib (SB1518)	NA	NA	NA	NA	NA	0.98	0.99	0.78	0.63	0.59	0.71	0.917	0.118	0.643	0.0611	0.184	0.621	3.86e-08	5.08e-07	-0.273	0.0191	0.37
ONC0005003	Diosmetin (Luteolin 4-methyl ether)	NA	NA	NA	NA	NA	0.86	1.28	1.09	0.75	0.75	0.91	1077	0.21	0.803	0.0924	0.739	0.947	0.00181	0.0153	-0.273	0.0699	0.566
ONC0005011	Suprofen (Profenal)	NA	NA	NA	NA	NA	1.33	1.74	0.98	1.1	1.1	1.03	1.35	0.38	1077	0.0404	0.999	1	0.904	1	-0.273	0.17	0.687
ONC0004487	TC-N-1752	Preclinical	sodium channel blocker	SCN9A			1.53	0.97	1.28	0.92	1.02	1.02	1.26	0.281	0.987	0.0577	0.992	1	0.466	0.944	-0.273	0.115	0.628
ONC0003798	FCE-22250	Phase 1	DNA directed DNA polymerase inhibitor				1.01	1.13	0.78	0.71	0.72	0.67	0.973	0.178	0.7	0.0265	0.361	0.778	3.39e-06	3.85e-05	-0.273	0.0569	0.538
ONC0000791	Darapladib	Phase 3	phospholipase inhibitor	PLA2G7			0.98	0.86	1.13	0.76	0.89	0.5	0.99	0.135	0.717	0.199	0.423	0.811	1.1e-05	0.00012	-0.273	0.0648	0.56
ONC0000186	PIM-1-Inhibitor-2	Preclinical	Pim kinase inhibitor	PIM1			0.99	1.07	1.06	0.91	0.7	0.69	1.04	0.0436	0.767	0.124	0.613	0.897	0.000257	0.00241	-0.273	0.0249	0.395
ONC0001652	GW-6471	Preclinical	PPAR receptor antagonist	PPARA			0.95	0.96	1.05	0.67	0.85	0.62	0.987	0.0551	0.713	0.121	0.41	0.805	8.73e-06	9.69e-05	-0.273	0.0211	0.372
ONC0000125	8-hydroxy-PIPAT	Preclinical	dopamine receptor ligand	DRD2|DRD3			1.14	1.16	1.18	1.01	0.78	0.87	1.16	0.02	0.887	0.116	0.925	1	0.0521	0.274	-0.273	0.0257	0.397
ONC0005522	ALFUZOSIN HYDROCHLORIDE	NA	NA	NA	NA	NA	1.07	1.11	1.59	0.97	0.99	0.99	1257	0.289	0.983	0.0115	0.991	1	0.446	0.932	-0.273	0.122	0.63
ONC0002794	WR99210	Preclinical	dihydrofolate reductase inhibitor	TYMS	infectious disease	malaria	0.96	1.4	1.21	0.94	0.9	0.91	1.19	0.221	0.917	0.0208	0.958	1	0.122	0.499	-0.273	0.082	0.586
ONC0000068	ML-281	Preclinical	serine/threonine kinase inhibitor	STK33			0.73	1.06	0.9	0.58	0.52	0.77	0.897	0.165	0.623	0.131	0.137	0.55	6.67e-09	9.12e-08	-0.273	0.0456	0.497
ONC0005331	RWJ-21757	Phase 2	toll-like receptor agonist	TLR7			1.28	1.14	1.32	0.98	1	0.94	1247	0.0945	0.973	0.0306	0.989	1	0.386	0.893	-0.273	0.0141	0.327
ONC0004817	Fluvastatin sodium (Lescol)	NA	NA	NA	NA	NA	1.15	1.11	1.49	1.05	0.83	1.06	1.25	0.209	0.98	0.13	0.99	1	0.426	0.919	-0.27	0.0719	0.572
ONC0004739	Crizotinib (PF-02341066)	NA	NA	NA	NA	NA	1.04	0.95	0.87	0.58	0.72	0.75	0.953	0.085	0.683	0.0907	0.292	0.741	9.81e-07	1.16e-05	-0.27	0.00996	0.296
ONC0004823	L-Glutamine	Launched		CTPS1|GLUL|GPRC6A|PPAT	gastroenterology|dental|neurology/psychiatry|rheumatology	diarrhea|mucositis|muscle pain|joint pain|peptic ulcer disease (PUD)|ulcerative colitis|Crohn's disease|anxiety|insomnia	1.4	1.05	1.55	1.13	1.03	1.03	1333	0.257	1063	0.0577	0.999	1	0.864	1	-0.27	0.103	0.614
ONC0004547	VE-821	Preclinical	ATR kinase inhibitor	ATR			1.01	0.9	1.12	0.5	0.87	0.85	1.01	0.11	0.74	0.208	0.499	0.851	5.13e-05	0.000526	-0.27	0.07	0.566
ONC0004026	SELEGILINE HYDROCHLORIDE	NA	NA	NA	NA	NA	1.12	1.57	0.99	1.08	0.96	0.83	1227	0.304	0.957	0.125	0.981	1	0.292	0.806	-0.27	0.131	0.633
ONC0002574	alvocidib	Phase 2	CDK inhibitor	CDK1|CDK2|CDK4|CDK5|CDK6|CDK7|CDK8|CDK9|EGFR|PYGM			0.29	0.25	0.48	0	0.07	0.14	0.34	0.123	0.07	0.07	5.41e-11	2.15e-09	4.22e-46	3.83e-44	-0.27	0.0209	0.37
ONC0002258	Actinomycin D	NA	NA	NA	NA	NA	0.26	0.38	0.37	0.04	0.05	0.11	0.337	0.0666	0.067	0.0379	4.37e-11	1.77e-09	2.03e-46	1.9e-44	-0.27	0.00375	0.227
ONC0001386	KG-5	Preclinical	RAF inhibitor	BRAF|FLT3|KIT|PDGFRB			1	0.98	0.8	0.74	0.52	0.71	0.927	0.11	0.657	0.119	0.21	0.668	1.18e-07	1.5e-06	-0.27	0.0227	0.383
ONC0003201	BETAMETHASONE VALERATE	NA	NA	NA	NA	NA	1.01	0.94	1.02	0.95	0.6	0.61	0.99	0.0436	0.72	0.199	0.423	0.811	1.38e-05	0.00015	-0.27	0.0689	0.565
ONC0000954	Sisomicin (sulfate)	NA	NA	NA	NA	NA	1.26	1.06	1.54	1.03	1.01	1.01	1287	0.241	1017	0.0115	0.996	1	0.647	1	-0.27	0.0959	0.61
ONC0001760	Ro-3306	Preclinical	CDK inhibitor	CDK1			1.09	0.85	0.91	0.74	0.69	0.61	0.95	0.125	0.68	0.0656	0.281	0.736	7.59e-07	9.02e-06	-0.27	0.0223	0.379
ONC0004167	ZOLPIDEM	NA	NA	NA	NA	NA	1.12	1.08	1.21	0.8	0.87	0.94	1137	0.0666	0.87	0.07	0.888	0.995	0.0299	0.177	-0.267	0.00441	0.238
ONC0004996	#NAME?	Preclinical					1.02	1.46	0.98	1.06	0.72	0.88	1153	0.266	0.887	0.17	0.916	1	0.0521	0.274	-0.267	0.115	0.628
ONC0003629	arcyriaflavin-a	Preclinical	CDK inhibitor	CCND1|CDK4			0.98	0.79	0.87	0.65	0.65	0.54	0.88	0.0954	0.613	0.0635	0.105	0.474	2.68e-09	3.77e-08	-0.267	0.0103	0.298
ONC0003623	HTH-01-015	Preclinical	protein kinase inhibitor	NUAK1			1.06	1.09	1.07	0.45	0.91	1.06	1073	0.0153	0.807	0.318	0.728	0.942	0.00214	0.0177	-0.267	0.142	0.652
ONC0002464	Mocetinostat	Phase 2	HDAC inhibitor	HDAC1|HDAC11|HDAC2|HDAC3			0.66	0.6	0.48	0.38	0.33	0.23	0.58	0.0917	0.313	0.0764	1.71e-05	0.000393	6.79e-26	1.79e-24	-0.267	0.00954	0.295
ONC0000525	PHENAZOPYRIDINE HYDROCHLORIDE	NA	NA	NA	NA	NA	1.24	0.98	1.39	0.72	1.04	1.05	1203	0.207	0.937	0.188	0.969	1	0.196	0.658	-0.267	0.0874	0.597
ONC0002110	Treosulfan	Launched	DNA synthesis inhibitor		oncology	ovarian cancer	1.13	1	1.7	0.95	1.05	1.03	1277	0.372	1.01	0.0529	0.995	1	0.608	0.997	-0.267	0.17	0.687
ONC0001889	GTS21	Phase 1/Phase 2	cholinergic receptor agonist	CHRNA7			1.18	1.02	1.11	0.75	0.83	0.93	1103	0.0802	0.837	0.0902	0.815	0.972	0.0083	0.0596	-0.267	0.00957	0.295
ONC0001023	Filgotinib	Phase 3	JAK inhibitor	JAK1|JAK2|JAK3|TYK2			1.2	1.05	1.06	0.88	0.81	0.82	1103	0.0839	0.837	0.0379	0.815	0.972	0.0083	0.0596	-0.267	0.0091	0.295
ONC0001709	cabozantinib	Launched	RET tyrosine kinase inhibitor|VEGFR inhibitor	KDR|MET|RET	oncology	medullary thyroid cancer (MTC)	0.87	1.09	0.96	0.77	0.58	0.77	0.973	0.111	0.707	0.11	0.361	0.778	5.46e-06	6.12e-05	-0.267	0.0207	0.37
ONC0002985	glutathione-monoisopropyl-ester	Phase 2	lipid peroxidase inhibitor				1.3	1.09	1.15	1.09	0.87	0.78	1.18	0.108	0.913	0.159	0.949	1	0.112	0.472	-0.267	0.0417	0.477
ONC0003703	esaprazole	Phase 2					1.32	1.2	0.91	0.91	0.98	0.75	1143	0.211	0.88	0.118	0.9	0.998	0.042	0.232	-0.263	0.0756	0.58
ONC0003530	SCH-58261	Preclinical	adenosine receptor antagonist	ADORA1|ADORA2A|ADORA2B|ADORA3			1	0.96	0.77	0.7	0.72	0.52	0.91	0.123	0.647	0.11	0.167	0.597	5.13e-08	6.73e-07	-0.263	0.0257	0.397
ONC0004165	SULISOBENZONE	Launched			dermatology	sunscreen lotion	1.31	1.19	0.99	0.94	0.71	1.05	1163	0.162	0.9	0.173	0.93	1	0.0779	0.368	-0.263	0.0636	0.558
ONC0004657	TAK-733	Phase 1	MEK inhibitor	MAP2K1			0.7	0.33	0.69	0.28	0.17	0.48	0.573	0.211	0.31	0.157	1.29e-05	0.000302	3.95e-26	1.05e-24	-0.263	0.0818	0.585
ONC0005180	Batimastat (BB-94)	NA	NA	NA	NA	NA	1.03	1.1	0.65	0.76	0.66	0.57	0.927	0.242	0.663	0.095	0.21	0.668	2.04e-07	2.56e-06	-0.263	0.0958	0.61
ONC0003637	Amrubicin	Launched	topoisomerase inhibitor	TOP2A|TOP2B	oncology	small cell lung cancer	0.89	1.09	0.91	0.68	0.79	0.63	0.963	0.11	0.7	0.0819	0.326	0.763	3.39e-06	3.85e-05	-0.263	0.0165	0.353
ONC0005187	Bromosporine	Preclinical	bromodomain inhibitor				0.68	1.09	0.98	0.88	0.65	0.43	0.917	0.212	0.653	0.225	0.184	0.621	8.97e-08	1.15e-06	-0.263	0.107	0.62
ONC0002646	sodium acrylate	NA	NA	NA	NA	NA	0.96	1.37	1.09	0.86	0.94	0.83	1.14	0.21	0.877	0.0569	0.894	0.998	0.0376	0.214	-0.263	0.077	0.582
ONC0003480	FK-866	Phase 2	niacinamide phosphoribosyltransferase inhibitor	NAMPT			0.34	0.41	0.14	-0.07	0.08	0.09	0.297	0.14	0.033	0.0896	3.16e-12	1.51e-10	1.13e-49	1.42e-47	-0.263	0.031	0.418
ONC0001566	Telcagepant	Phase 3	calcitonin antagonist	CALCRL|RAMP1			1.34	1	1.21	1.08	0.7	0.98	1183	0.172	0.92	0.197	0.952	1	0.133	0.526	-0.263	0.0785	0.582
ONC0000580	SCOPOLAMINE HYDROBROMIDE	NA	NA	NA	NA	NA	1.17	1.07	1.5	1.06	1.03	0.86	1247	0.225	0.983	0.108	0.989	1	0.446	0.932	-0.263	0.0845	0.593
ONC0000500	MERCAPTOPURINE	Launched	immunosuppressant|protein synthesis inhibitor|purine antagonist	HPRT1|IMPDH1|IMPDH2|PPAT	hematologic malignancy	acute lymphoblastic leukemia (ALL)	1.28	1.11	0.94	0.89	0.83	0.82	1.11	0.17	0.847	0.0379	0.832	0.975	0.0125	0.0846	-0.263	0.0545	0.531
ONC0000968	Filanesib	Phase 3	kinesin inhibitor|kinesin-like spindle protein inhibitor	KIF11			0.55	0.6	0.49	0.26	0.14	0.45	0.547	0.0551	0.283	0.156	4.01e-06	9.9e-05	4.66e-28	1.33e-26	-0.263	0.0435	0.49
ONC0005398	tolamolol	Phase 3	adrenergic receptor antagonist	ADRB1|ADRB2|ADRB3			1.24	1.38	0.98	0.78	1.1	0.93	1.2	0.203	0.937	0.16	0.966	1	0.196	0.658	-0.263	0.0782	0.582
ONC0001230	Balipodect	NA	NA	NA	NA	NA	1.08	0.94	1.16	0.71	0.95	0.73	1.06	0.111	0.797	0.133	0.684	0.925	0.0013	0.0112	-0.263	0.0301	0.417
ONC0002969	Sanazole	Phase 1					1.33	0.93	1.2	0.91	0.97	0.79	1153	0.204	0.89	0.0917	0.916	1	0.0578	0.295	-0.263	0.0708	0.568
ONC0003570	melperone	Launched	dopamine receptor antagonist|serotonin receptor antagonist	DRD2|HTR2A	neurology/psychiatry	psychosis	1.03	0.9	1.04	0.84	0.45	0.9	0.99	0.0781	0.73	0.244	0.423	0.811	2.69e-05	0.000283	-0.26	0.0998	0.611
ONC0004047	PRAVASTATIN SODIUM	NA	NA	NA	NA	NA	0.97	1.2	1.13	0.77	0.9	0.85	1.1	0.118	0.84	0.0656	0.806	0.968	0.00954	0.0666	-0.26	0.0209	0.37
ONC0005043	MG-132	Preclinical	proteasome inhibitor	PSMB1			0.38	0.42	0.45	0.26	0.1	0.11	0.417	0.0351	0.157	0.0896	5.43e-09	1.81e-07	3.29e-38	1.72e-36	-0.26	0.0126	0.318
ONC0002503	PPT	Preclinical	estrogen receptor agonist	ESR1			0.73	1.2	1.15	0.65	0.78	0.87	1027	0.258	0.767	0.111	0.563	0.874	0.000257	0.00241	-0.26	0.108	0.621
ONC0003365	Indibulin	Phase 1/Phase 2	tubulin polymerization inhibitor				0.57	0.41	0.65	0.3	0.37	0.18	0.543	0.122	0.283	0.0961	3.45e-06	8.56e-05	4.66e-28	1.33e-26	-0.26	0.0236	0.39
ONC0001089	Napabucasin	Phase 3	STAT inhibitor	STAT3			0.33	0.44	0.27	0.05	0.13	0.08	0.347	0.0862	0.087	0.0404	8.25e-11	3.2e-09	1.6e-44	1.3e-42	-0.26	0.0101	0.296
ONC0001118	PT-2385	Phase 1	hypoxia inducible factor inhibitor	EPAS1			1.3	1.19	1	0.99	0.9	0.82	1163	0.152	0.903	0.085	0.93	1	0.0856	0.393	-0.26	0.0387	0.468
ONC0001488	ER-50891	Preclinical	retinoid receptor antagonist	RARA			1.38	0.87	1.31	1.02	0.91	0.85	1187	0.276	0.927	0.0862	0.955	1	0.157	0.579	-0.26	0.12	0.63
ONC0001684	L-152804	Preclinical	neuropeptide receptor antagonist	NPY5R			1.15	1.51	1.09	0.82	1.04	1.11	1.25	0.227	0.99	0.151	0.99	1	0.487	0.945	-0.26	0.0924	0.606
ONC0001207	Tivantinib	Phase 3	tyrosine kinase inhibitor	MET			0.97	0.69	0.37	0.35	0.43	0.47	0.677	0.3	0.417	0.0611	0.000657	0.011	3.81e-19	8.13e-18	-0.26	0.135	0.642
ONC0005452	lisadimate	Launched	topical sunscreen agent		dermatology	sunscreen lotion	0.99	1.02	1.38	0.75	0.8	1.06	1.13	0.217	0.87	0.166	0.876	0.99	0.0299	0.177	-0.26	0.0899	0.603
ONC0004682	Masitinib (AB1010)	NA	NA	NA	NA	NA	1.22	0.99	0.88	0.74	0.82	0.76	1.03	0.173	0.773	0.0416	0.575	0.879	0.000375	0.00346	-0.257	0.0587	0.541
ONC0005254	Tanshinone IIA (Tanshinone B)	NA	NA	NA	NA	NA	1.16	1.33	1.54	1.09	0.98	1.19	1343	0.19	1087	0.105	0.999	1	0.927	1	-0.257	0.065	0.56
ONC0004531	CHIR-99021 (CT99021) HCl	NA	NA	NA	NA	NA	0.95	0.93	1.06	0.75	0.73	0.69	0.98	0.07	0.723	0.0306	0.385	0.789	1.73e-05	0.000185	-0.257	0.00649	0.275
ONC0003582	JNJ-16259685	Preclinical	glutamate receptor antagonist	GRM1			1.28	1.11	1.32	0.96	1.01	0.97	1237	0.112	0.98	0.0265	0.985	1	0.426	0.919	-0.257	0.0254	0.397
ONC0005056	PF-2545920	NA	NA	NA	NA	NA	1.44	1.02	1.28	1.09	0.96	0.92	1247	0.212	0.99	0.0889	0.989	1	0.487	0.945	-0.257	0.0797	0.583
ONC0004356	CEP-32496	Phase 1/Phase 2	RAF inhibitor	BRAF|RAF1			1.03	1.25	1.13	0.85	0.96	0.83	1137	0.11	0.88	0.07	0.888	0.995	0.042	0.232	-0.257	0.0175	0.353
ONC0004868	Onalespib (AT13387)	NA	NA	NA	NA	NA	0.3	0.47	0.32	0.1	0.11	0.11	0.363	0.0929	0.107	0.00577	2.33e-10	8.68e-09	1.14e-42	7.86e-41	-0.257	0.0203	0.37
ONC0004991	Gandotinib (LY2784544)	NA	NA	NA	NA	NA	0.75	0.97	1.29	0.74	0.81	0.69	1003	0.272	0.747	0.0603	0.473	0.837	7.79e-05	0.000786	-0.257	0.12	0.63
ONC0001069	Garenoxacin (Mesylate hydrate)	NA	NA	NA	NA	NA	1.27	1.21	1.34	1.13	0.88	1.04	1273	0.0651	1017	0.127	0.994	1	0.647	1	-0.257	0.0263	0.4
ONC0002298	cinflumide	Phase 2	muscle relaxant				1.22	0.99	1.16	0.84	0.61	1.15	1123	0.119	0.867	0.271	0.862	0.986	0.0266	0.161	-0.257	0.119	0.63
ONC0001007	Opicapone	Phase 3	catechol O methyltransferase inhibitor	COMT			1.3	1.04	1.09	0.83	0.77	1.06	1143	0.138	0.887	0.153	0.9	0.998	0.0521	0.274	-0.257	0.049	0.507
ONC0001961	Homochlorcyclizine2HCl	NA	NA	NA	NA	NA	1.27	1.25	1.22	0.97	1.01	0.99	1247	0.0252	0.99	0.02	0.989	1	0.487	0.945	-0.257	0.000108	0.0897
ONC0001979	Vinblastine (sulfate)	NA	NA	NA	NA	NA	0.31	0.45	0.58	0.18	0.17	0.22	0.447	0.135	0.19	0.0265	2.85e-08	8.59e-07	2.23e-35	9.23e-34	-0.257	0.038	0.465
ONC0001176	Nimorazole	Launched	bacterial DNA inhibitor		oncology	head and neck squamous cell carcinoma (HNSCC)	1.46	1.04	1	0.78	0.94	1.01	1167	0.255	0.91	0.118	0.934	1	0.103	0.446	-0.257	0.109	0.621
ONC0001224	Tipiracil (hydrochloride)	NA	NA	NA	NA	NA	1.04	1	1.71	1.08	0.92	0.98	1.25	0.399	0.993	0.0808	0.99	1	0.507	0.957	-0.257	0.191	0.705
ONC0004743	Parthenolide ((-)-Parthenolide)	NA	NA	NA	NA	NA	0.81	1.43	1.39	0.83	0.98	1.06	1.21	0.347	0.957	0.117	0.973	1	0.292	0.806	-0.253	0.167	0.685
ONC0004751	Bicalutamide (Casodex)	NA	NA	NA	NA	NA	1.47	1.46	0.98	0.98	1.05	1.12	1303	0.28	1.05	0.07	0.998	1	0.814	1	-0.253	0.127	0.632
ONC0004795	Ruxolitinib (INCB018424)	NA	NA	NA	NA	NA	1.48	0.9	1.37	0.98	0.99	1.02	1.25	0.308	0.997	0.0208	0.99	1	0.528	0.968	-0.253	0.145	0.653
ONC0004518	Pergolide mesylate	NA	NA	NA	NA	NA	1.25	0.64	1.39	0.61	0.99	0.92	1093	0.399	0.84	0.202	0.788	0.963	0.00954	0.0666	-0.253	0.2	0.71
ONC0004127	TOREMIFENE CITRATE	NA	NA	NA	NA	NA	1.1	1.06	0.75	0.72	0.79	0.64	0.97	0.192	0.717	0.0751	0.349	0.774	1.1e-05	0.00012	-0.253	0.0683	0.565
ONC0003998	BENZOYLPAS	Preclinical					1.09	1	0.96	0.33	0.94	1.02	1017	0.0666	0.763	0.377	0.525	0.861	0.000212	0.00202	-0.253	0.182	0.701
ONC0005153	MK8745	Preclinical	Aurora kinase inhibitor	AURKA			0.82	0.94	1.28	0.9	0.7	0.68	1013	0.239	0.76	0.122	0.512	0.856	0.000174	0.00168	-0.253	0.1	0.611
ONC0004477	MK-8776 (SCH 900776)	NA	NA	NA	NA	NA	0.74	1.09	0.97	0.55	0.7	0.79	0.933	0.178	0.68	0.121	0.229	0.688	7.59e-07	9.02e-06	-0.253	0.0602	0.545
ONC0003882	ORLISTAT	Launched	lipase inhibitor	CNR1|DAGLA|DAGLB|FASN|LIPF|PNLIP	endocrinology	weight-loss aid	0.91	1.23	1.08	0.93	0.66	0.87	1073	0.16	0.82	0.142	0.728	0.942	0.004	0.0316	-0.253	0.0552	0.532
ONC0003044	ZM-336372	Preclinical	RAF inhibitor	BRAF|LCK|MAPK14|RAF1			0.93	1.41	1.28	0.99	0.92	0.95	1207	0.248	0.953	0.0351	0.971	1	0.275	0.784	-0.253	0.109	0.621
ONC0000194	YM-750	Phase 1	ACAT inhibitor	SOAT1			1.23	1.05	1.02	1.07	0.47	1	1.1	0.114	0.847	0.328	0.806	0.968	0.0125	0.0846	-0.253	0.156	0.667
ONC0002625	MPEP	Preclinical	glutamate receptor antagonist	GRM1|GRM4|GRM5			0.93	1.33	1.2	0.92	0.89	0.89	1153	0.204	0.9	0.0173	0.916	1	0.0779	0.368	-0.253	0.0818	0.585
ONC0001618	SCH-23390	Preclinical	dopamine receptor antagonist	DRD1|DRD5|HTR2C|KCNJ4|KCNJ6			0.98	1.03	1.18	0.91	0.85	0.67	1063	0.104	0.81	0.125	0.695	0.93	0.00251	0.0205	-0.253	0.028	0.408
ONC0005585	Peruvoside	Phase 1	cardiac glycoside				0.25	0.44	0.23	0.04	0.08	0.04	0.307	0.116	0.053	0.0231	6.17e-12	2.83e-10	1.05e-47	1.13e-45	-0.253	0.0291	0.412
ONC0001839	ISO-1	Preclinical	macrophage migration inhibiting factor inhibitor	MIF			1.11	1.28	1.32	0.77	1.15	1.03	1237	0.112	0.983	0.194	0.985	1	0.446	0.932	-0.253	0.0698	0.565
ONC0001841	Xanomeline (oxalate)	NA	NA	NA	NA	NA	0.95	1.1	1.24	0.92	0.76	0.85	1097	0.145	0.843	0.0802	0.797	0.966	0.0109	0.0753	-0.253	0.037	0.455
ONC0004485	CI-976	Phase 1	ACAT inhibitor	ACAT1|CES1			0.93	1.1	1.7	1.04	0.93	1.01	1243	0.405	0.993	0.0569	0.988	1	0.507	0.957	-0.25	0.198	0.708
ONC0003826	hydroxypropyl-beta-cyclodextrin	Phase 2/Phase 3					1.29	0.99	1.57	1	0.99	1.11	1283	0.29	1033	0.0666	0.996	1	0.737	1	-0.25	0.136	0.642
ONC0001270	SNG-1153	Preclinical	selective estrogen receptor modulator (SERM)	ESR1			1.18	1.2	1.15	1.01	0.83	0.94	1177	0.0252	0.927	0.0907	0.946	1	0.157	0.579	-0.25	0.0168	0.353
ONC0001302	Nisoldipine	Launched	calcium channel blocker	CACNA1C|CACNA1D|CACNA1F|CACNA1S	cardiology	hypertension	1.26	1.18	1.28	1.02	0.94	1.01	1.24	0.0529	0.99	0.0436	0.987	1	0.487	0.945	-0.25	0.00181	0.165
ONC0005516	pumosetrag	Phase 2	serotonin receptor agonist	HTR3A|HTR4			1.28	1.07	1.18	0.96	0.83	0.99	1177	0.105	0.927	0.085	0.946	1	0.157	0.579	-0.25	0.0174	0.353
ONC0001550	GSK2606414	Preclinical	protein kinase inhibitor	EIF2AK3|MYLK2			0.96	1.24	0.7	0.74	0.68	0.73	0.967	0.27	0.717	0.0321	0.337	0.769	1.1e-05	0.00012	-0.25	0.124	0.632
ONC0003196	TUBOCURARINE CHLORIDE PENTAHYDRATE	NA	NA	NA	NA	NA	1.23	1.31	1.15	0.98	0.96	1	1.23	0.08	0.98	0.02	0.983	1	0.426	0.919	-0.25	0.0133	0.321
ONC0001743	MCOPPB	Preclinical	nociceptin/orphanin FQ receptor agonist	OPRL1			1.05	1.19	0.95	0.79	0.82	0.83	1063	0.121	0.813	0.0208	0.695	0.93	0.00294	0.0238	-0.25	0.0328	0.427
ONC0002139	polidocanol	Launched	local anesthetic		dermatology	varicose veins	1.09	1.24	1.12	0.82	1.06	0.83	1.15	0.0794	0.903	0.136	0.911	1	0.0856	0.393	-0.247	0.0336	0.432
ONC0005263	Tanshinone I	NA	NA	NA	NA	NA	1.19	0.79	1.32	0.65	0.74	1.17	1.1	0.276	0.853	0.278	0.806	0.968	0.0162	0.106	-0.247	0.168	0.687
ONC0004161	PYRONARIDINE TETRAPHOSPHATE	NA	NA	NA	NA	NA	1.14	0.96	1.04	0.82	0.77	0.81	1047	0.0902	0.8	0.0265	0.637	0.909	0.00154	0.0131	-0.247	0.0167	0.353
ONC0004853	Lomibuvir (VX-222, VCH-222)	NA	NA	NA	NA	NA	1.26	1.01	1.4	0.99	1.01	0.93	1223	0.198	0.977	0.0416	0.98	1	0.406	0.902	-0.247	0.0791	0.582
ONC0002477	Tucatinib	Phase 3	EGFR inhibitor	ERBB2			0.89	0.87	0.91	0.7	0.62	0.61	0.89	0.02	0.643	0.0493	0.123	0.519	3.86e-08	5.08e-07	-0.247	0.00316	0.202
ONC0004305	ETEBENECID	Preclinical	uricosuric blocker				1.71	0.96	0.99	1.07	0.92	0.93	1.22	0.425	0.973	0.0839	0.978	1	0.386	0.893	-0.247	0.211	0.721
ONC0001022	Decernotinib	Phase 2/Phase 3	JAK inhibitor	JAK3			1.15	1.52	0.98	1.07	0.97	0.87	1217	0.276	0.97	0.1	0.977	1	0.366	0.877	-0.247	0.129	0.632
ONC0001154	Eglumegad	NA	NA	NA	NA	NA	0.91	1.19	1.47	0.98	0.83	1.02	1.19	0.28	0.943	0.1	0.958	1	0.226	0.711	-0.247	0.132	0.634
ONC0005229	PIK-293	Preclinical	PI3K inhibitor	PIK3CA|PIK3CB|PIK3CD|PIK3CG			0.82	1.32	1.38	0.99	0.97	0.83	1173	0.307	0.93	0.0872	0.942	1	0.169	0.607	-0.243	0.151	0.664
ONC0005008	Idoxuridin	NA	NA	NA	NA	NA	1.73	0.95	0.67	0.94	1	0.68	1117	0.549	0.873	0.17	0.847	0.98	0.0336	0.195	-0.243	0.265	0.772
ONC0002265	Avatrombopag	Launched	thrombopoietin receptor agonist	MPL	hematology	thrombocytopenia	1.15	1.11	1.25	0.86	0.98	0.94	1.17	0.0721	0.927	0.0611	0.938	1	0.157	0.579	-0.243	0.00593	0.26
ONC0003439	Taurocholic acid	NA	NA	NA	NA	NA	1.05	1.26	1.02	1.06	0.73	0.81	1.11	0.131	0.867	0.172	0.832	0.975	0.0266	0.161	-0.243	0.0641	0.558
ONC0005533	QUETIAPINE FUMARATE	NA	NA	NA	NA	NA	1.27	1.02	1.49	0.98	1.07	1	1.26	0.235	1017	0.0473	0.992	1	0.647	1	-0.243	0.106	0.616
ONC0003317	SODIUM TETRADECYL SULFATE	NA	NA	NA	NA	NA	0.91	1.17	1.58	1.08	0.99	0.86	1.22	0.338	0.977	0.111	0.978	1	0.406	0.902	-0.243	0.169	0.687
ONC0001804	Epothilone D	NA	NA	NA	NA	NA	0.29	0.51	0.55	0.27	0.14	0.21	0.45	0.14	0.207	0.0651	3.41e-08	1.02e-06	5.26e-34	2.01e-32	-0.243	0.0384	0.467
ONC0001157	Radafaxine (hydrochloride)	NA	NA	NA	NA	NA	1	1.17	1.54	0.85	1.04	1.09	1237	0.276	0.993	0.127	0.985	1	0.507	0.957	-0.243	0.133	0.637
ONC0005343	proacipimox	Phase 1	cholesterol inhibitor				1.01	1.01	1.38	0.99	0.74	0.94	1133	0.214	0.89	0.132	0.882	0.993	0.0578	0.295	-0.243	0.0914	0.606
ONC0005434	RX-3117	Phase 1/Phase 2	CDK inhibitor|DNA synthesis inhibitor	CDK2|DNMT1			0.99	0.83	0.82	0.79	0.41	0.71	0.88	0.0954	0.637	0.2	0.105	0.474	2.17e-08	2.91e-07	-0.243	0.0791	0.582
ONC0002947	coenzyme-i	Phase 2		AASS|ACADS|ADH1A|ADH1B|ADH1C|ADH4|ADH5|ADH7|AKR1B1|AKR1C1|AKR1C2|AKR1C3|AKR1C4|ALDH1A1|ALDH1A2|ALDH1A3|ALDH1B1|ALDH2|ALDH3A1|ALDH3A2|ALDH3B1|ALDH3B2|ALDH4A1|ALDH5A1|ALDH6A1|ALDH7A1|ALDH9A1|AMT|BDH1|BLVRA|BLVRB|CDO1|CYB5R3|CYP17A1|CYP4A11|DHCR7|DHFR|DLAT|DLD|EHHADH|GAPDH|GAPDHS|GLUD1|GLUD2|GPD1|GSR|H6PD|HADH|HADHA|HIBADH|HMGCR|HMOX1|HMOX2|HPGD|HSD11B1|HSD11B2|HSD17B1|HSD17B10|HSD17B2|HSD17B3|HSD17…			1.38	1.15	1.33	0.95	1.07	1.11	1287	0.121	1043	0.0833	0.996	1	0.785	1	-0.243	0.0262	0.399
ONC0002162	valethamate	Launched	acetylcholine receptor antagonist	CHRM1|CHRM4|CHRM5	obstetrics/gynecology	labor induction	1.15	1.04	1.68	1.08	1.02	1.05	1.29	0.342	1.05	0.03	0.996	1	0.814	1	-0.24	0.174	0.689
ONC0005223	CP-91149	Preclinical	glycogen phosphorylase inhibitor	PYGL			0.77	1.29	0.74	0.7	0.82	0.56	0.933	0.309	0.693	0.13	0.229	0.688	2.08e-06	2.41e-05	-0.24	0.156	0.667
ONC0005225	Tubastatin A hydrochloride	NA	NA	NA	NA	NA	1.09	0.87	1.21	0.98	0.88	0.59	1057	0.172	0.817	0.203	0.673	0.923	0.00343	0.0276	-0.24	0.0975	0.611
ONC0004335	DMNB	Preclinical	DNA dependent protein kinase inhibitor				1.21	1.38	1.15	1	1.05	0.97	1247	0.119	1007	0.0404	0.989	1	0.588	0.993	-0.24	0.0305	0.418
ONC0005029	PH-797804	Phase 2	p38 MAPK inhibitor	MAPK11|MAPK14			1.38	1.08	1.17	1.04	0.96	0.91	1.21	0.154	0.97	0.0656	0.973	1	0.366	0.877	-0.24	0.0491	0.508
ONC0004039	NEBIVOLOL HYDROCHLORIDE	NA	NA	NA	NA	NA	1.1	0.99	0.98	0.64	0.82	0.89	1023	0.0666	0.783	0.129	0.55	0.868	0.000648	0.00581	-0.24	0.0322	0.426
ONC0003633	SN-38	Launched	topoisomerase inhibitor	TOP1	oncology	colorectal cancer	0.05	0.3	0.45	0.03	0.04	0.01	0.267	0.202	0.027	0.0153	4e-13	2.14e-11	2.46e-50	3.38e-48	-0.24	0.0876	0.597
ONC0003854	bromantan	Launched	dopamine reuptake inhibitor|serotonin reuptake inhibitor		neurology/psychiatry	neurasthenia	1.22	1.53	0.95	1.15	0.81	1.02	1233	0.29	0.993	0.172	0.984	1	0.507	0.957	-0.24	0.15	0.661
ONC0004278	SR-33805 oxalate	NA	NA	NA	NA	NA	0.79	0.98	1.69	1.05	0.86	0.83	1153	0.474	0.913	0.119	0.916	1	0.112	0.472	-0.24	0.238	0.747
ONC0003018	ML-365	Preclinical	potassium channel blocker	KCNK3|KCNK9			1.09	1.11	0.81	0.77	0.79	0.73	1003	0.168	0.763	0.0306	0.473	0.837	0.000212	0.00202	-0.24	0.0636	0.558
ONC0000840	ML-3403	Preclinical	MAP kinase inhibitor	CYP3A4|MAPK11|MAPK12|MAPK14			0.6	0.97	1.34	0.65	0.73	0.81	0.97	0.37	0.73	0.08	0.349	0.774	2.69e-05	0.000283	-0.24	0.189	0.705
ONC0000033	PPY-A	Preclinical	Abl kinase inhibitor	ABL1|BCR			0.95	1.01	1.38	0.77	0.96	0.89	1113	0.233	0.873	0.0961	0.84	0.979	0.0336	0.195	-0.24	0.104	0.616
ONC0000989	IC261	Preclinical	casein kinase inhibitor	CSNK1A1|CSNK1D|CSNK1E|CSNK1G2			1.21	0.87	0.78	0.67	0.76	0.71	0.953	0.227	0.713	0.0451	0.292	0.741	8.73e-06	9.69e-05	-0.24	0.102	0.614
ONC0001675	beta-CCB	Launched	benzodiazepine receptor ligand	GABRA1|GABRG2			0.93	1.21	1.29	0.96	0.9	0.85	1143	0.189	0.903	0.0551	0.9	0.998	0.0856	0.393	-0.24	0.0753	0.58
ONC0001192	Pexidartinib	Launched	tyrosine kinase inhibitor	CSF1R|FLT3|KIT			1.41	1.01	1.23	0.94	0.91	1.08	1217	0.2	0.977	0.0907	0.977	1	0.406	0.902	-0.24	0.0811	0.584
ONC0005024	Dinaciclib (SCH727965)	NA	NA	NA	NA	NA	0.18	0.12	0.24	0.08	-0.12	-0.13	0.18	0.06	-0.057	0.118	6.43e-16	4.96e-14	5.07e-59	2.04e-56	-0.237	0.0274	0.406
ONC0004862	WYE-354	Preclinical	mTOR inhibitor	MTOR			1.15	1.18	1.06	0.83	0.93	0.92	1.13	0.0624	0.893	0.0551	0.876	0.99	0.064	0.318	-0.237	0.00412	0.23
ONC0004923	Lacidipine (Lacipil, Motens)	NA	NA	NA	NA	NA	0.81	1.13	1.76	1.11	0.97	0.91	1233	0.483	0.997	0.103	0.984	1	0.528	0.968	-0.237	0.244	0.755
ONC0004877	Pimasertib (AS-703026)	NA	NA	NA	NA	NA	1.07	1.04	0.95	0.98	0.52	0.85	1.02	0.0624	0.783	0.237	0.537	0.863	0.000648	0.00581	-0.237	0.111	0.622
ONC0004402	PF-04929113 (SNX-5422)	NA	NA	NA	NA	NA	0.52	0.35	0.49	0.24	0.18	0.23	0.453	0.0907	0.217	0.0321	4.08e-08	1.2e-06	3.39e-33	1.25e-31	-0.237	0.017	0.353
ONC0004972	Mitiglinide Calcium	NA	NA	NA	NA	NA	1.65	1.21	1.23	1.11	1.15	1.12	1363	0.248	1127	0.0208	1	1	0.981	1	-0.237	0.12	0.63
ONC0002527	IRL-2500	Preclinical	endothelin receptor antagonist	EDNRB			1.62	1.05	1.25	1.11	1	1.1	1307	0.289	1.07	0.0608	0.998	1	0.885	1	-0.237	0.145	0.653
ONC0002843	THONZYLAMINE HYDROCHLORIDE	NA	NA	NA	NA	NA	1.17	1.22	1.12	0.89	0.9	1.01	1.17	0.05	0.933	0.0666	0.938	1	0.182	0.63	-0.237	0.00479	0.243
ONC0000387	U-75799E	Phase 1	growth hormone releasing factor agonist	GHSR			1.06	1.07	1.04	0.93	0.8	0.73	1057	0.0153	0.82	0.101	0.673	0.923	0.004	0.0316	-0.237	0.0266	0.401
ONC0005491	CGS 19755	NA	NA	NA	NA	NA	1.26	1.13	1.45	1.19	1.01	0.93	1.28	0.161	1043	0.133	0.995	1	0.785	1	-0.237	0.0618	0.549
ONC0003202	BRUCINE	Preclinical	glycine receptor antagonist	CHRM1|CHRM2|CHRM3|CHRM4|CHRM5			0.98	0.96	1.06	0.81	0.77	0.71	1	0.0529	0.763	0.0503	0.461	0.831	0.000212	0.00202	-0.237	0.00249	0.186
ONC0005531	AMINOPTERIN	Phase 3	dihydrofolate reductase inhibitor	DHFR|SLC46A1			1.36	1.02	1.23	1.01	0.95	0.94	1203	0.172	0.967	0.0379	0.969	1	0.347	0.857	-0.237	0.0668	0.564
ONC0000888	GW-1100	Preclinical	G protein-coupled receptor agonist	FFAR1			1.3	0.91	1.4	0.99	1	0.91	1203	0.259	0.967	0.0493	0.969	1	0.347	0.857	-0.237	0.126	0.632
ONC0005328	LOPERAMIDE HYDROCHLORIDE	NA	NA	NA	NA	NA	1.29	1.26	1.01	0.96	0.99	0.9	1187	0.154	0.95	0.0458	0.955	1	0.258	0.761	-0.237	0.0532	0.524
ONC0002119	cyclovalone	Launched	breast cancer resistance protein inhibitor	ABCG2	gastroenterology	bile stimulation	0.94	1.05	1.12	0.8	0.8	0.81	1037	0.0907	0.803	0.00577	0.6	0.889	0.00181	0.0153	-0.233	0.0232	0.387
ONC0004006	MONTELUKAST SODIUM	NA	NA	NA	NA	NA	1.2	1.26	1.17	0.99	0.97	0.97	1.21	0.0458	0.977	0.0115	0.973	1	0.406	0.902	-0.233	0.00461	0.24
ONC0004845	NEXIUM (esomeprazole magnesium)	NA	NA	NA	NA	NA	1.3	1.03	1.4	1.07	1	0.96	1243	0.191	1.01	0.0557	0.988	1	0.608	0.997	-0.233	0.0806	0.584
ONC0003995	DULOXETINE HYDROCHLORIDE	NA	NA	NA	NA	NA	1.41	0.98	0.99	0.97	0.94	0.77	1127	0.245	0.893	0.108	0.869	0.988	0.064	0.318	-0.233	0.118	0.63
ONC0004586	SU11274	Preclinical	hepatocyte growth factor receptor inhibitor|tyrosine kinase inhibitor	MET			0.97	0.98	1.22	0.81	0.79	0.87	1057	0.142	0.823	0.0416	0.673	0.923	0.00465	0.0361	-0.233	0.0469	0.497
ONC0000675	PIMOZIDE	Launched	dopamine receptor antagonist	CACNA1I|CALM1|DRD1|DRD2|DRD3|DRD4|DRD5|HRH1|HTR1A|HTR2A|KCNA10|KCNH2	neurology/psychiatry	Tourette's disorder	1.35	0.84	1.16	0.98	0.85	0.82	1117	0.258	0.883	0.085	0.847	0.98	0.0468	0.252	-0.233	0.127	0.632
ONC0000657	CIMETIDINE	Launched	histamine receptor antagonist	HRH2|SLC29A4|SLC47A1|SLC47A2	gastroenterology|hematologic malignancy|endocrinology	duodenal ulcer disease|peptic ulcer disease (PUD)|gastroesophageal reflux disease (GERD)|aggressive systemic mastocytosis (ASM)|Zollinger-Ellison syndrome|endocrine adenoma	1.05	1.44	1.35	1.01	1.05	1.08	1.28	0.204	1047	0.0351	0.995	1	0.799	1	-0.233	0.0916	0.606
ONC0000678	SULCONAZOLE NITRATE	NA	NA	NA	NA	NA	1.31	1.29	1.05	1	0.93	1.02	1217	0.145	0.983	0.0473	0.977	1	0.446	0.932	-0.233	0.0481	0.503
ONC0000329	DEHYDROCHOLATE SODIUM	NA	NA	NA	NA	NA	1	0.93	1.25	1.1	0.64	0.74	1.06	0.168	0.827	0.242	0.684	0.925	0.0054	0.0411	-0.233	0.125	0.632
ONC0001579	LY2090314	Phase 2	glycogen synthase kinase inhibitor	GSK3B			0.77	0.93	0.68	0.53	0.47	0.68	0.793	0.127	0.56	0.108	0.0183	0.166	1.39e-11	2.19e-10	-0.233	0.0369	0.455
ONC0003111	BENZOYL PEROXIDE	NA	NA	NA	NA	NA	1.23	1.23	1	0.97	0.94	0.85	1153	0.133	0.92	0.0624	0.916	1	0.133	0.526	-0.233	0.0374	0.458
ONC0003300	Liquiritigenin	NA	NA	NA	NA	NA	1.11	0.99	1.38	0.85	1	0.93	1.16	0.2	0.927	0.0751	0.925	1	0.157	0.579	-0.233	0.0852	0.594
ONC0005348	DILTIAZEM HYDROCHLORIDE	NA	NA	NA	NA	NA	0.94	1.3	1.28	0.76	1.05	1.01	1173	0.202	0.94	0.157	0.942	1	0.211	0.681	-0.233	0.0971	0.611
ONC0002932	cyclopenthiazide	Launched	thiazide diuretic		cardiology	hypertension|congestive heart failure	1.11	1	1	0.96	0.56	0.89	1037	0.0635	0.803	0.214	0.6	0.889	0.00181	0.0153	-0.233	0.0961	0.61
ONC0002928	rimexolone	Launched	glucocorticoid receptor agonist	NR3C1|SERPINA6	ophthalmology	anterior uveitis	1.17	0.84	1.43	0.94	0.93	0.87	1147	0.296	0.913	0.0379	0.906	1	0.112	0.472	-0.233	0.152	0.664
ONC0002158	AZD1208	Phase 1	Pim kinase inhibitor	PIM1|PIM2|PIM3			1	1.23	1.13	0.96	0.91	0.8	1.12	0.115	0.89	0.0819	0.855	0.984	0.0578	0.295	-0.23	0.027	0.404
ONC0004535	BI-847325	Phase 1	Aurora kinase inhibitor|MEK inhibitor	AURKA|AURKB|AURKC|MAP2K1|MAP2K2			0.23	0.47	0.33	0.05	0.07	0.22	0.343	0.121	0.113	0.0929	6.68e-11	2.63e-09	4.65e-42	3.08e-40	-0.23	0.0314	0.421
ONC0003571	TC-G-1005	Preclinical	G protein-coupled receptor agonist	GPBAR1			1.47	0.81	1.51	1.09	1.02	0.99	1263	0.393	1033	0.0513	0.993	1	0.737	1	-0.23	0.209	0.719
ONC0004200	HYDROCORTISONE VALERATE	NA	NA	NA	NA	NA	0.99	1.18	1.29	0.95	1.2	0.62	1153	0.152	0.923	0.291	0.916	1	0.145	0.552	-0.23	0.156	0.666
ONC0004871	Pimobendan (Vetmedin)	NA	NA	NA	NA	NA	1.02	1.09	1	0.85	0.85	0.72	1037	0.0473	0.807	0.0751	0.6	0.889	0.00214	0.0177	-0.23	0.008	0.29
ONC0004021	BENZYDAMINE HYDROCHLORIDE	NA	NA	NA	NA	NA	0.97	1.14	1.43	0.95	0.95	0.95	1.18	0.233	0.95	0	0.949	1	0.258	0.761	-0.23	0.114	0.627
ONC0003806	riodoxol	Launched	other antibiotic				1.36	1.09	1.12	1	0.96	0.92	1.19	0.148	0.96	0.04	0.958	1	0.31	0.826	-0.23	0.053	0.524
ONC0002699	quinpirol-(-)	Phase 2	dopamine receptor agonist	DRD1|DRD2|DRD3|DRD4|HTR1A|HTR2A|HTR2B|HTR2C			0.98	1.35	1.23	1	0.94	0.93	1187	0.189	0.957	0.0379	0.955	1	0.292	0.806	-0.23	0.0824	0.586
ONC0001455	EC-23	Preclinical	retinoid receptor agonist	RARA|RARB|RARG			1.55	1.13	1.33	1.11	1.14	1.07	1337	0.21	1107	0.0351	0.999	1	0.961	1	-0.23	0.0978	0.611
ONC0000472	TENOFOVIR	Launched	HIV integrase inhibitor|nucleoside reverse transcriptase inhibitor		infectious disease	human immunodeficiency virus (HIV-1)|hepatitis B	1.13	1.01	0.98	0.85	0.86	0.72	1.04	0.0794	0.81	0.0781	0.613	0.897	0.00251	0.0205	-0.23	0.0116	0.316
ONC0002111	Tepotinib	NA	NA	NA	NA	NA	1.04	1.22	1.2	0.8	1	0.97	1153	0.0987	0.923	0.108	0.916	1	0.145	0.552	-0.23	0.0266	0.401
ONC0002019	terguride	Launched	dopamine receptor agonist|serotonin receptor antagonist	ADRA1A|ADRA2A|ADRA2B|ADRA2C|DRD2|DRD3|DRD4|HTR1A|HTR1B|HTR1D|HTR2A|HTR2B|HTR2C	neurology/psychiatry	Parkinson's Disease	0.97	0.92	1.54	0.97	0.73	1.04	1143	0.344	0.913	0.163	0.9	0.998	0.112	0.472	-0.23	0.188	0.705
ONC0005313	DEXFOSFOSERINE HYDROCHLORIDE	NA	NA	NA	NA	NA	0.99	1.24	0.99	0.85	1.02	0.66	1073	0.144	0.843	0.18	0.728	0.942	0.0109	0.0753	-0.23	0.0814	0.584
ONC0002910	EDTMP	Preclinical	chelating agent				1.24	0.97	1.51	0.87	1.12	1.04	1.24	0.27	1.01	0.128	0.987	1	0.608	0.997	-0.23	0.139	0.649
ONC0005345	PALMIDROL [5mM]	NA	NA	NA	NA	NA	1.07	1.32	1.25	0.99	1	0.96	1213	0.129	0.983	0.0208	0.975	1	0.446	0.932	-0.23	0.0436	0.49
ONC0002970	tetrahydrouridine	Phase 2	cytidine deaminase inhibitor	CDA			1.15	1.52	0.9	0.99	0.99	0.9	1.19	0.312	0.96	0.052	0.958	1	0.31	0.826	-0.23	0.165	0.682
ONC0002957	etanidazole	Phase 3	bacterial cell wall synthesis inhibitor				1.33	1.35	1.18	1.22	0.84	1.11	1287	0.0929	1057	0.196	0.996	1	0.84	1	-0.23	0.0838	0.59
ONC0004679	Cyclocytidine HCl	NA	NA	NA	NA	NA	0.55	0.38	0.77	0.43	0.28	0.31	0.567	0.196	0.34	0.0794	9.68e-06	0.00023	4.76e-24	1.2e-22	-0.227	0.0861	0.595
ONC0004749	Danusertib (PHA-739358)	NA	NA	NA	NA	NA	0.83	0.62	0.9	0.51	0.62	0.54	0.783	0.146	0.557	0.0569	0.0144	0.139	9.82e-12	1.56e-10	-0.227	0.05	0.512
ONC0002163	Wy-16922	Phase 1	histamine release inhibitor				1.06	1.39	0.96	0.93	0.99	0.81	1137	0.225	0.91	0.0917	0.888	0.995	0.103	0.446	-0.227	0.108	0.621
ONC0004673	Abexinostat (PCI-24781)	NA	NA	NA	NA	NA	0.66	0.91	0.79	0.29	0.91	0.48	0.787	0.125	0.56	0.318	0.0156	0.147	1.39e-11	2.19e-10	-0.227	0.172	0.687
ONC0003999	BUFLOMEDIL HYDROCHLORIDE	NA	NA	NA	NA	NA	1.17	1.32	0.97	0.98	0.83	0.97	1153	0.176	0.927	0.0839	0.916	1	0.157	0.579	-0.227	0.0706	0.567
ONC0004016	ESCITALOPRAM OXALATE	NA	NA	NA	NA	NA	1	1.4	1.23	1.05	1.14	0.76	1.21	0.201	0.983	0.199	0.973	1	0.446	0.932	-0.227	0.118	0.63
ONC0004601	MGCD-265	Preclinical	VEGFR inhibitor	AXL|MET			1.18	1.07	1.07	0.98	0.84	0.82	1107	0.0635	0.88	0.0872	0.823	0.974	0.042	0.232	-0.227	0.0128	0.318
ONC0003861	acetyl-farnesyl-cysteine	Launched	methyltransferase inhibitor	PPARG	dermatology	acne vulgaris (AV)	1.11	1.11	1.24	1.01	0.88	0.89	1153	0.0751	0.927	0.0723	0.916	1	0.157	0.579	-0.227	0.00986	0.296
ONC0003379	RESERPINE	Launched	vesicular monoamine transporter inhibitor	SLC18A1|SLC18A2	cardiology	hypertension	0.93	1.08	1.35	1	0.86	0.82	1.12	0.213	0.893	0.0945	0.855	0.984	0.064	0.318	-0.227	0.0992	0.611
ONC0000691	DIPYRIDAMOLE	Launched	phosphodiesterase inhibitor	ADA|PDE10A|PDE1A|PDE1B|PDE1C|PDE2A|PDE3A|PDE3B|PDE4A|PDE4B|PDE4C|PDE4D|PDE5A|PDE6A|PDE6B|PDE6C|PDE6D|PDE6G|PDE6H|PDE7A|PDE7B|PDE8A|PDE8B|PDE9A|SLC29A1	cardiology	coronary artery disease (CAD)|peripheral artery disease (PAD)|hypertension	1.1	1.1	1.07	0.85	0.84	0.9	1.09	0.0173	0.863	0.0321	0.779	0.959	0.0236	0.147	-0.227	0.000774	0.151
ONC0000722	Romidepsin	Launched	HDAC inhibitor	HDAC1|HDAC2|HDAC3|HDAC4|HDAC5|HDAC6|HDAC7|HDAC8|HDAC9	hematologic malignancy	cutaneous T-cell lymphoma (CTCL)	0.26	0.18	0.42	0	0.12	0.06	0.287	0.122	0.06	0.06	1.6e-12	7.97e-11	4.63e-47	4.42e-45	-0.227	0.0328	0.427
ONC0002724	SLV-320	Phase 2	adenosine receptor antagonist	ADORA1|ADORA2A|ADORA2B|ADORA3			1.1	1.45	1.03	0.86	0.98	1.06	1193	0.225	0.967	0.101	0.961	1	0.347	0.857	-0.227	0.108	0.621
ONC0002453	MBX-2982	Phase 2	glucose dependent insulinotropic receptor agonist	GPR119			1.06	1.08	1.36	0.95	0.9	0.97	1167	0.168	0.94	0.0361	0.934	1	0.211	0.681	-0.227	0.0693	0.565
ONC0001114	MK-8033	Phase 1	c-Met inhibitor	MET			1.16	1.1	1.17	0.92	0.92	0.91	1143	0.0379	0.917	0.00577	0.9	0.998	0.122	0.499	-0.227	0.00401	0.23
ONC0001078	Medroxyprogesterone	Launched	progesterone receptor agonist	PGR	endocrinology	contraceptive	1.52	0.78	1.09	0.82	0.89	1	1.13	0.372	0.903	0.0907	0.876	0.99	0.0856	0.393	-0.227	0.201	0.71
ONC0000946	Taprenepag	Phase 2	prostaglandin receptor agonist	PTGER2			1.75	1	1.29	1.17	1.05	1.14	1347	0.378	1.12	0.0624	0.999	1	0.976	1	-0.227	0.204	0.711
ONC0001878	fendiline	Preclinical	calcium channel blocker	HTR2B			1.47	1.12	1.17	0.84	1.22	1.02	1253	0.189	1027	0.19	0.99	1	0.703	1	-0.227	0.109	0.621
ONC0002987	bentiromide	Launched		HPN	gastroenterology	pancreas diagnostic agent	1.18	1.38	0.76	0.94	0.71	0.99	1107	0.316	0.88	0.149	0.823	0.974	0.042	0.232	-0.227	0.174	0.689
ONC0004699	ORY-1001 (RG-6016) 2HCl	NA	NA	NA	NA	NA	1	1.29	1.17	1.08	0.76	0.95	1153	0.146	0.93	0.161	0.916	1	0.169	0.607	-0.223	0.075	0.58
ONC0004766	PF-4981517	Preclinical	cytochrome P450 inhibitor	CYP3A4			0.82	1.24	1.31	1.23	0.68	0.79	1123	0.265	0.9	0.291	0.862	0.986	0.0779	0.368	-0.223	0.191	0.705
ONC0004390	ML-298	Preclinical	phospholipase inhibitor	PLD2			0.97	1.27	0.98	0.82	0.78	0.95	1073	0.17	0.85	0.0889	0.728	0.942	0.0143	0.0945	-0.223	0.0686	0.565
ONC0004911	Lafutidine	Launched	histamine receptor antagonist	HRH2	gastroenterology	duodenal ulcer disease|peptic ulcer disease (PUD)	1.16	1.21	1.09	0.77	1.03	0.99	1153	0.0603	0.93	0.14	0.916	1	0.169	0.607	-0.223	0.0468	0.497
ONC0003872	zilpaterol	Launched	adrenergic receptor agonist	ADRB2	endocrinology	weight-gain aid	0.9	1.23	1.03	0.72	0.94	0.83	1053	0.166	0.83	0.11	0.661	0.916	0.00624	0.0466	-0.223	0.0675	0.565
ONC0004287	ACRISORCIN	Launched	other antifungal		infectious disease	fungal infection	1.07	1.33	1.23	1.02	0.88	1.06	1.21	0.131	0.987	0.0945	0.973	1	0.466	0.944	-0.223	0.0407	0.475
ONC0003080	A61603
ONC0001233	JNJ-63533054	Preclinical	G protein-coupled receptor agonist	GPR139			1.06	0.99	1.29	0.77	0.82	1.08	1113	0.157	0.89	0.166	0.84	0.979	0.0578	0.295	-0.223	0.0832	0.587
ONC0001420	ESI-09	Preclinical	EPAC inhibitor	RAPGEF3|RAPGEF4			0.97	1.19	1.15	0.94	0.89	0.81	1103	0.117	0.88	0.0656	0.815	0.972	0.042	0.232	-0.223	0.0301	0.417
ONC0003169	DROPERIDOL	Launched	dopamine receptor antagonist	ADRA1A|DRD2|DRD3|DRD4|HTR2A	gastroenterology	nausea|vomiting	1.11	1.1	1.14	0.97	0.83	0.88	1117	0.0208	0.893	0.0709	0.847	0.98	0.064	0.318	-0.223	0.0123	0.318
ONC0003193	FLUPHENAZINE HYDROCHLORIDE	NA	NA	NA	NA	NA	1.24	1.24	0.86	0.88	0.87	0.92	1113	0.219	0.89	0.0265	0.84	0.979	0.0578	0.295	-0.223	0.109	0.622
ONC0003150	VER-155008	Preclinical	HSP inhibitor	HSPA1A			1.6	0.71	1.23	1.05	0.84	0.98	1.18	0.447	0.957	0.107	0.949	1	0.292	0.806	-0.223	0.24	0.749
ONC0000910	NP118809	NA	NA	NA	NA	NA	0.93	1.12	1.19	0.8	0.83	0.94	1.08	0.135	0.857	0.0737	0.749	0.947	0.0184	0.118	-0.223	0.0417	0.477
ONC0002974	NOV-002	Phase 3		GSR			1.21	0.82	1.56	0.97	0.96	0.99	1197	0.37	0.973	0.0153	0.964	1	0.386	0.893	-0.223	0.203	0.71
ONC0001212	Nomifensine	Withdrawn	dopamine reuptake inhibitor|noradrenaline uptake inhibitor	DRD2|SLC6A2|SLC6A3			1.04	1.19	1.32	0.99	0.88	1.01	1183	0.14	0.96	0.07	0.952	1	0.31	0.826	-0.223	0.0459	0.497
ONC0004675	CYC116	Phase 1	Aurora kinase inhibitor	AURKA|AURKB|KDR			0.75	0.99	1.28	0.61	0.99	0.76	1007	0.265	0.787	0.191	0.486	0.843	0.000774	0.00688	-0.22	0.157	0.669
ONC0004708	Varespladib (LY315920)	NA	NA	NA	NA	NA	1.08	1.11	1.09	0.87	0.96	0.79	1093	0.0153	0.873	0.085	0.788	0.963	0.0336	0.195	-0.22	0.0213	0.374
ONC0002136	spizofurone	Withdrawn					1.08	1.38	1.06	0.87	0.99	1	1173	0.179	0.953	0.0723	0.942	1	0.275	0.784	-0.22	0.0779	0.582
ONC0002904	thiethylperazine	Launched	dopamine receptor antagonist	DRD1|DRD2|DRD4	gastroenterology	nausea	1.1	0.99	1.12	0.86	0.87	0.82	1.07	0.07	0.85	0.0265	0.717	0.938	0.0143	0.0945	-0.22	0.0106	0.304
ONC0002719	2-BFI	Preclinical	imidazoline receptor ligand	ADRA2A|ADRA2B|ADRA2C|MAOA|MAOB			1.35	1.2	1.07	1.06	0.88	1.02	1207	0.14	0.987	0.0945	0.971	1	0.466	0.944	-0.22	0.0483	0.504
ONC0000646	HYDRASTINE (1R, 9S)	NA	NA	NA	NA	NA	1.07	1.22	1.2	0.94	0.92	0.97	1163	0.0814	0.943	0.0252	0.93	1	0.226	0.711	-0.22	0.0167	0.353
ONC0002290	SENNOSIDE A	NA	NA	NA	NA	NA	1.37	1.21	1.11	1.02	0.95	1.06	1.23	0.131	1.01	0.0557	0.983	1	0.608	0.997	-0.22	0.0422	0.481
ONC0002800	NA	NA	NA	NA	NA	NA	0.95	1.19	1.09	0.95	0.48	1.14	1077	0.121	0.857	0.34	0.739	0.947	0.0184	0.118	-0.22	0.191	0.705
ONC0003164	D-4476	Preclinical	TGF beta receptor inhibitor	CSNK1A1|CSNK1D|TGFB1			1.04	1.28	1.03	1	0.89	0.8	1117	0.142	0.897	0.1	0.847	0.98	0.0706	0.343	-0.22	0.0502	0.512
ONC0000993	THZ1-R	Preclinical	CDK inhibitor	CDK7			1.06	1.17	1.12	0.91	0.84	0.94	1117	0.0551	0.897	0.0513	0.847	0.98	0.0706	0.343	-0.22	0.00363	0.223
ONC0001782	XMD8-92	Preclinical	MAP kinase inhibitor	DCLK2|MAPK7|PLK4|TNK1			1.07	1.33	0.86	0.97	0.8	0.83	1087	0.235	0.867	0.0907	0.769	0.954	0.0266	0.161	-0.22	0.121	0.63
ONC0001704	TC-A-2317	Preclinical	Aurora kinase inhibitor	AURKA			0.75	0.69	0.67	0.47	0.45	0.53	0.703	0.0416	0.483	0.0416	0.00156	0.023	2.28e-15	4.23e-14	-0.22	0.00147	0.154
ONC0004717	Roscovitine (Seliciclib, CYC202)	NA	NA	NA	NA	NA	0.85	0.91	1.76	0.98	0.95	0.94	1173	0.509	0.957	0.0208	0.942	1	0.292	0.806	-0.217	0.269	0.776
ONC0004782	Agomelatine	Launched	melatonin receptor agonist|serotonin receptor antagonist	HTR2A|HTR2B|HTR2C|MTNR1A|MTNR1B	neurology/psychiatry	depression	1.02	1.11	1.28	1.01	1	0.75	1137	0.132	0.92	0.147	0.888	0.995	0.133	0.526	-0.217	0.0658	0.561
ONC0005275	Dichlorphenamide (Diclofenamide)	NA	NA	NA	NA	NA	1.25	1.35	1.03	0.99	0.89	1.1	1.21	0.164	0.993	0.105	0.973	1	0.507	0.957	-0.217	0.0691	0.565
ONC0003758	pikamilone	Phase 1					1.1	1.28	1	0.95	1.03	0.75	1127	0.142	0.91	0.144	0.869	0.988	0.103	0.446	-0.217	0.0686	0.565
ONC0004945	Nobiletin (Hexamethoxyflavone)	NA	NA	NA	NA	NA	0.87	0.96	0.8	0.68	0.69	0.61	0.877	0.0802	0.66	0.0436	0.0991	0.464	1.55e-07	1.96e-06	-0.217	0.0123	0.318
ONC0003821	volinanserin	Phase 3	serotonin receptor antagonist	HTR2A|HTR2B|HTR2C|KCNH2			0.96	1.16	1.54	1.03	0.98	1	1.22	0.295	1003	0.0252	0.978	1	0.568	0.985	-0.217	0.165	0.683
ONC0003897	ENALAPRILAT	Launched	angiotensin converting enzyme inhibitor	ACE	cardiology	hypertension	1.13	1.15	1.2	0.99	1.03	0.81	1.16	0.0361	0.943	0.117	0.925	1	0.226	0.711	-0.217	0.0372	0.456
ONC0002499	Bay 60-7550	NA	NA	NA	NA	NA	1.01	0.94	1.22	0.58	0.96	0.98	1057	0.146	0.84	0.225	0.673	0.923	0.00954	0.0666	-0.217	0.123	0.63
ONC0002835	DIPYROCETYL	Launched	chelating agent		endocrinology|neurology/psychiatry	fever|pain relief	0.97	1.36	1.1	0.99	0.8	0.99	1143	0.199	0.927	0.11	0.9	0.998	0.157	0.579	-0.217	0.0966	0.611
ONC0000763	CHLORAMPHENICOL PALMITATE	NA	NA	NA	NA	NA	0.84	1.02	1.19	0.59	0.81	1	1017	0.175	0.8	0.205	0.525	0.861	0.00154	0.0131	-0.217	0.119	0.63
ONC0003177	AZATHIOPRINE	Launched	dehydrogenase inhibitor	HPRT1|IMPDH1|PPAT	transplant|rheumatology	renal homotransplantation|rheumatoid arthritis	0.95	1.07	1.09	0.85	0.76	0.85	1037	0.0757	0.82	0.052	0.6	0.889	0.004	0.0316	-0.217	0.00958	0.295
ONC0000085	doxorubicin	Launched	topoisomerase inhibitor	TOP2A	hematologic malignancy|oncology	acute lymphoblastic leukemia (ALL)|acute myeloid leukemia (AML)|Wilm's tumor|breast cancer|ovarian cancer|Hodgkin's lymphoma|bladder cancer|multiple myeloma	0.19	0.29	0.24	0.07	0.03	-0.03	0.24	0.05	0.023	0.0503	5.94e-14	3.6e-12	1.14e-50	1.65e-48	-0.217	0.00307	0.198
ONC0003271	CHLORPYRIFOS	Launched	acetylcholinesterase inhibitor	ACHE			1	1.34	1.24	0.91	1.03	0.99	1193	0.175	0.977	0.0611	0.961	1	0.406	0.902	-0.217	0.0773	0.582
ONC0001039	CHS-828	NA	NA	NA	NA	NA	0.2	0.12	0.41	0.1	-0.01	-0.01	0.243	0.15	0.027	0.0635	7.56e-14	4.48e-12	2.46e-50	3.38e-48	-0.217	0.0571	0.538
ONC0001837	CPI-203	Preclinical	bromodomain inhibitor	BRD4			0.46	0.49	0.46	0.37	0.19	0.2	0.47	0.0173	0.253	0.101	9.8e-08	2.75e-06	2.59e-30	8.04e-29	-0.217	0.0309	0.418
ONC0005426	indisulam	Phase 2	CDK inhibitor	CA1|CA12|CA14|CA2|CA6|CA7|CA9			0.73	0.77	0.68	0.51	0.48	0.54	0.727	0.0451	0.51	0.03	0.00316	0.0417	5.53e-14	9.5e-13	-0.217	0.00187	0.167
ONC0004834	ZLN005	Preclinical					1.25	1	0.96	1.02	0.91	0.64	1.07	0.157	0.857	0.196	0.717	0.938	0.0184	0.118	-0.213	0.109	0.622
ONC0004214	PALIPERIDONE	Launched	dopamine receptor antagonist|serotonin receptor antagonist	DRD2|HTR2A	neurology/psychiatry	schizophrenia	1.26	0.96	0.99	0.74	0.99	0.84	1.07	0.165	0.857	0.126	0.717	0.938	0.0184	0.118	-0.213	0.0774	0.582
ONC0003700	2-cyanopyrimidine	NA	NA	NA	NA	NA	1.21	1.21	0.82	0.95	0.99	0.66	1.08	0.225	0.867	0.18	0.749	0.947	0.0266	0.161	-0.213	0.136	0.643
ONC0004842	DMXAA (Vadimezan)	NA	NA	NA	NA	NA	1.2	1	1.43	0.98	1.03	0.98	1.21	0.215	0.997	0.0289	0.973	1	0.528	0.968	-0.213	0.113	0.623
ONC0005152	AMG-517	Phase 1	TRPV antagonist	TRPV1			1.34	1.23	0.96	0.83	1.06	1	1177	0.196	0.963	0.119	0.946	1	0.329	0.839	-0.213	0.0983	0.611
ONC0004311	AZD5438	Phase 1	CDK inhibitor	KCNH2			0.55	0.96	0.96	0.62	0.73	0.48	0.823	0.237	0.61	0.125	0.0359	0.264	1.97e-09	2.8e-08	-0.213	0.13	0.633
ONC0002244	Trametinib	Launched	MEK inhibitor	MAP2K1|MAP2K2	oncology	melanoma	0.75	0.77	0.71	0.5	0.52	0.57	0.743	0.0306	0.53	0.0361	0.00508	0.0604	5.42e-13	8.92e-12	-0.213	0.000805	0.151
ONC0003324	DANTHRON	NA	NA	NA	NA	NA	0.96	1.68	0.98	1.15	0.85	0.98	1207	0.41	0.993	0.15	0.971	1	0.507	0.957	-0.213	0.235	0.746
ONC0002087	Briciclib	Phase 1	cyclin D inhibitor	CCND1			0.41	0.5	0.53	0.27	0.23	0.3	0.48	0.0624	0.267	0.0351	1.64e-07	4.48e-06	2.67e-29	8.08e-28	-0.213	0.00626	0.269
ONC0001050	MDL-29951	Preclinical	glutamate receptor antagonist	FBP1			1.03	0.99	1.15	0.82	0.96	0.75	1057	0.0833	0.843	0.107	0.673	0.923	0.0109	0.0753	-0.213	0.028	0.408
ONC0002946	levobunolol
ONC0005022	AS-252424	Preclinical	PI3K inhibitor	PIK3CG			1.32	0.94	1.2	1.13	0.8	0.9	1153	0.194	0.943	0.169	0.916	1	0.226	0.711	-0.21	0.116	0.63
ONC0004435	Edoxaban	Launched	coagulation factor inhibitor	F10	neurology/psychiatry|hematology|cardiology	stroke|pulmonary embolism (PE)|systemic embolism|deep vein thrombosis (DVT)|atrial fibrillation (AF)	1.24	1.36	1.09	0.95	1.03	1.08	1.23	0.135	1.02	0.0656	0.983	1	0.666	1	-0.21	0.0487	0.505
ONC0004468	Carfilzomib (PR-171)	NA	NA	NA	NA	NA	0.46	0.01	0.57	0.2	0.12	0.09	0.347	0.297	0.137	0.0569	8.25e-11	3.2e-09	5.82e-40	3.34e-38	-0.21	0.172	0.687
ONC0004488	Flavoxate HCl	NA	NA	NA	NA	NA	1.25	1.11	1.07	0.82	0.99	0.99	1143	0.0945	0.933	0.0981	0.9	0.998	0.182	0.63	-0.21	0.028	0.408
ONC0003645	Moxaverine	Launched	phosphodiesterase inhibitor		neurology/psychiatry	spasms	0.98	0.97	0.93	0.74	0.83	0.68	0.96	0.0265	0.75	0.0755	0.314	0.758	9.56e-05	0.000951	-0.21	0.0148	0.339
ONC0000696	MEBENDAZOLE	Launched	tubulin polymerization inhibitor	TUBA1A|TUBB|TUBB4B	infectious disease	pinworm|whipworm|hookworm|ascariasis	0.73	0.63	0.97	0.49	0.62	0.59	0.777	0.175	0.567	0.0681	0.0122	0.123	2.79e-11	4.3e-10	-0.21	0.081	0.584
ONC0000741	CETYLPYRIDINIUM CHLORIDE	NA	NA	NA	NA	NA	0.93	0.85	1.02	0.8	0.71	0.66	0.933	0.085	0.723	0.0709	0.229	0.688	1.73e-05	0.000185	-0.21	0.0159	0.349
ONC0001378	ML314	Preclinical	neurotensin agonist	NTSR1			1.03	0.95	0.93	0.73	0.75	0.8	0.97	0.0529	0.76	0.0361	0.349	0.774	0.000174	0.00168	-0.21	0.00343	0.215
ONC0001602	AZ20	Preclinical	ATR kinase inhibitor	ATR|MTOR			0.79	0.86	0.67	0.55	0.59	0.55	0.773	0.0961	0.563	0.0231	0.0113	0.115	1.97e-11	3.06e-10	-0.21	0.0281	0.408
ONC0001320	K02288	Preclinical	bone morphogenic protein inhibitor	BMP1			1.02	1.1	1.21	1.03	0.9	0.77	1.11	0.0954	0.9	0.13	0.832	0.975	0.0779	0.368	-0.21	0.0466	0.497
ONC0005504	GSK-923295	Phase 1	centromere associated protein inhibitor	CENPE			0.37	0.52	0.55	0.38	0.2	0.23	0.48	0.0964	0.27	0.0964	1.64e-07	4.48e-06	4.75e-29	1.42e-27	-0.21	0.028	0.408
ONC0005575	Benzamil HCl	NA	NA	NA	NA	NA	0.96	1.1	1.39	1	0.82	1	1.15	0.219	0.94	0.104	0.911	1	0.211	0.681	-0.21	0.118	0.63
ONC0001525	BNTX	Preclinical	opioid receptor antagonist	OPRD1|OPRK1|OPRM1			0.83	1.03	0.99	0.85	0.55	0.82	0.95	0.106	0.74	0.165	0.281	0.736	5.13e-05	0.000526	-0.21	0.0749	0.58
ONC0005604	Bemcentinib	NA	NA	NA	NA	NA	1.23	0.96	0.87	0.89	0.86	0.68	1.02	0.187	0.81	0.114	0.537	0.863	0.00251	0.0205	-0.21	0.0936	0.606
ONC0002790	(D)-5-methylhydantoin	NA	NA	NA	NA	NA	0.95	0.97	1.23	0.95	0.59	0.98	1.05	0.156	0.84	0.217	0.649	0.915	0.00954	0.0666	-0.21	0.126	0.632
ONC0000870	ATB-346	Phase 2	cyclooxygenase inhibitor	PTGER2			1	0.99	1.27	0.99	0.63	1.01	1087	0.159	0.877	0.214	0.769	0.954	0.0376	0.214	-0.21	0.125	0.632
ONC0000553	DIBUCAINE	NA	NA	NA	NA	NA	0.87	1.17	1.06	0.84	0.89	0.74	1033	0.152	0.823	0.0764	0.588	0.885	0.00465	0.0361	-0.21	0.0616	0.549
ONC0000973	Genz-644282	Phase 1	topoisomerase inhibitor	TOP1			0.17	0.09	0.19	-0.01	-0.13	-0.04	0.15	0.0529	-0.06	0.0624	5.91e-17	5.46e-15	2.2e-59	1.03e-56	-0.21	0.006	0.26
ONC0001021	Etizolam	Launched	benzodiazepine receptor agonist	GABRA1	neurology/psychiatry	insomnia|anxiety	1.21	0.95	1.08	0.57	0.91	1.13	1.08	0.13	0.87	0.282	0.749	0.947	0.0299	0.177	-0.21	0.166	0.683
ONC0001726	APcK-110	Preclinical	KIT inhibitor	KIT|STAT3			0.75	0.78	0.99	0.65	0.57	0.67	0.84	0.131	0.63	0.0529	0.0505	0.324	1.21e-08	1.63e-07	-0.21	0.0466	0.497
ONC0005450	alafosfalin	Phase 1	bacterial cell wall synthesis inhibitor				0.95	1.21	1.45	0.98	0.96	1.04	1203	0.25	0.993	0.0416	0.969	1	0.507	0.957	-0.21	0.141	0.652
ONC0004692	AT9283	Phase 2	Aurora kinase inhibitor|JAK inhibitor	AURKA|AURKB|JAK2|JAK3|RPS6KA6|STK17A			0.73	0.45	0.73	0.51	0.27	0.51	0.637	0.162	0.43	0.139	0.00016	0.00311	2.36e-18	4.94e-17	-0.207	0.0848	0.594
ONC0004709	Deoxyarbutin	Preclinical	tyrosinase inhibitor				1.3	1.03	1.25	1.06	0.93	0.97	1193	0.144	0.987	0.0666	0.961	1	0.466	0.944	-0.207	0.0572	0.538
ONC0004215	CYCLOSPORINE	NA	NA	NA	NA	NA	0.71	0.44	1.04	0.25	0.69	0.63	0.73	0.3	0.523	0.239	0.00348	0.0454	2.56e-13	4.26e-12	-0.207	0.203	0.71
ONC0004361	Mezlocillin Sodium	NA	NA	NA	NA	NA	1.29	1.49	0.92	1.07	0.83	1.18	1233	0.289	1027	0.179	0.984	1	0.703	1	-0.207	0.181	0.699
ONC0005040	Apitolisib (GDC-0980, RG7422)	NA	NA	NA	NA	NA	0.91	0.99	0.98	0.87	0.7	0.69	0.96	0.0436	0.753	0.101	0.314	0.758	0.000117	0.00115	-0.207	0.0273	0.406
ONC0004609	Droxidopa (L-DOPS)	NA	NA	NA	NA	NA	1.31	0.86	1.37	1.03	1	0.89	1.18	0.279	0.973	0.0737	0.949	1	0.386	0.893	-0.207	0.163	0.681
ONC0005009	BMS-265246	Preclinical	CDK inhibitor	CDK1|CDK2			1.22	0.8	0.88	0.58	0.81	0.89	0.967	0.223	0.76	0.161	0.337	0.769	0.000174	0.00168	-0.207	0.135	0.641
ONC0001141	Brexpiprazole	Launched	dopamine receptor partial agonist	DRD2	neurology/psychiatry	depression|schizophrenia	1.17	1.04	1.18	0.86	0.98	0.93	1.13	0.0781	0.923	0.0603	0.876	0.99	0.145	0.552	-0.207	0.0123	0.318
ONC0000095	CYM-50260	Preclinical	sphingosine 1-phosphate receptor agonist	S1PR4			1.02	0.98	0.99	0.91	0.64	0.82	0.997	0.0208	0.79	0.137	0.448	0.825	0.000922	0.00813	-0.207	0.0591	0.541
ONC0001410	dynole-34-2	Preclinical	dynamin inhibitor	DNM1			1.34	0.69	0.97	0.83	0.67	0.88	1	0.326	0.793	0.11	0.461	0.831	0.0011	0.0095	-0.207	0.195	0.706
ONC0001529	SB-612111	Preclinical	nociceptin/orphanin FQ receptor antagonist	OPRL1			1.22	1.17	0.94	0.91	0.83	0.97	1.11	0.149	0.903	0.0702	0.832	0.975	0.0856	0.393	-0.207	0.0617	0.549
ONC0005607	(±)-Lisofylline	NA	NA	NA	NA	NA	1.11	1.14	1.18	1.04	0.97	0.8	1143	0.0351	0.937	0.123	0.9	0.998	0.196	0.658	-0.207	0.0458	0.497
ONC0003252	sapropterin	Launched	phenylalanine 4-hydroxylase stimulant	NOS3|PAH|TH|TPH1	metabolism	hyperphenylalaninemia (HPA)	1.01	1.54	1.16	0.94	1.02	1.13	1237	0.273	1.03	0.0954	0.985	1	0.72	1	-0.207	0.16	0.674
ONC0000848	PLX8394	Phase 1/Phase 2	serine/threonine kinase inhibitor	BRAF			0.96	1	1.36	0.98	0.84	0.88	1107	0.22	0.9	0.0721	0.823	0.974	0.0779	0.368	-0.207	0.12	0.63
ONC0001044	Tandospirone	Launched	serotonin receptor agonist	HTR1A	neurology/psychiatry	generalized anxiety disorder (GAD)|dysthymic disorder	1	1.18	1.17	0.68	0.96	1.09	1117	0.101	0.91	0.21	0.847	0.98	0.103	0.446	-0.207	0.113	0.623
ONC0000963	LY2334737	Phase 1	antitumor agent|ribonucleotide reductase inhibitor				0.98	1.16	1.11	0.93	0.8	0.9	1083	0.0929	0.877	0.0681	0.759	0.95	0.0376	0.214	-0.207	0.0202	0.37
ONC0005400	NPC-01	Phase 3	steroid				1.14	0.99	1.56	0.98	1.03	1.06	1.23	0.295	1023	0.0404	0.983	1	0.684	1	-0.207	0.175	0.689
ONC0004757	F351	Phase 2	TGF beta receptor inhibitor	TGFB1			1.46	0.84	1.31	1.03	0.98	0.99	1203	0.323	1	0.0265	0.969	1	0.548	0.978	-0.203	0.195	0.706
ONC0004122	D-Pinitol	NA	NA	NA	NA	NA	1.55	1.3	1.17	1.22	1.18	1.01	1.34	0.193	1137	0.112	0.999	1	0.987	1	-0.203	0.103	0.614
ONC0004523	ETP-46464	Preclinical	ATR kinase inhibitor				1.09	1.52	1.09	1.06	1	1.03	1233	0.248	1.03	0.03	0.984	1	0.72	1	-0.203	0.146	0.653
ONC0003715	3-anilinopropan-1-ol	Preclinical					0.89	0.94	1.38	0.98	0.74	0.88	1.07	0.27	0.867	0.121	0.717	0.938	0.0266	0.161	-0.203	0.163	0.68
ONC0003962	TYLOSIN TARTRATE	NA	NA	NA	NA	NA	0.14	0.54	0.62	0.23	0.26	0.2	0.433	0.257	0.23	0.03	1.38e-08	4.31e-07	3.93e-32	1.33e-30	-0.203	0.152	0.664
ONC0004010	CLOFAZIMINE	Launched	GK0582 inhibitor		infectious disease	leprosy	0.84	1.05	0.9	0.68	0.77	0.73	0.93	0.108	0.727	0.0451	0.22	0.682	2.16e-05	0.00023	-0.203	0.0332	0.429
ONC0004443	ipsapirone	Phase 3	serotonin receptor agonist	HTR1A			0.91	1.28	1.09	0.91	0.69	1.07	1093	0.185	0.89	0.191	0.788	0.963	0.0578	0.295	-0.203	0.128	0.632
ONC0005115	Rimonabant (SR141716)	NA	NA	NA	NA	NA	0.93	0.99	0.94	0.61	0.72	0.92	0.953	0.0321	0.75	0.157	0.292	0.741	9.56e-05	0.000951	-0.203	0.0747	0.58
ONC0003839	1-hexadecanal	Preclinical	sphingosine 1-phosphate receptor substrate	DBI|RHO			1.1	1.42	1.08	1.02	0.91	1.06	1.2	0.191	0.997	0.0777	0.966	1	0.528	0.968	-0.203	0.099	0.611
ONC0005123	AZD1080	Phase 1	glycogen synthase kinase inhibitor	GSK3A|GSK3B			1.08	1.25	0.99	0.84	0.86	1.01	1107	0.132	0.903	0.0929	0.823	0.974	0.0856	0.393	-0.203	0.0512	0.517
ONC0005185	Rilpivirine	Launched	non-nucleoside reverse transcriptase inhibitor	NR1I2|SCN10A	infectious disease	human immunodeficiency virus (HIV-1)	1.07	0.93	0.95	0.92	0.7	0.72	0.983	0.0757	0.78	0.122	0.398	0.792	0.000541	0.00491	-0.203	0.0411	0.476
ONC0002552	iCRT-14	Preclinical	beta catenin inhibitor|WNT signaling inhibitor	CTNNB1|TCF4			0.96	1.23	1.21	0.89	0.97	0.93	1133	0.15	0.93	0.04	0.882	0.993	0.169	0.607	-0.203	0.0681	0.565
ONC0000250	AEE788	Phase 1/Phase 2	EGFR inhibitor|VEGFR inhibitor	EGFR|ERBB2|ERBB4|FGFR2|FGFR3|KDR			1.35	1.12	0.87	0.98	0.74	1.01	1113	0.24	0.91	0.148	0.84	0.979	0.103	0.446	-0.203	0.146	0.653
ONC0002575	CL-218872	Phase 1	benzodiazepine receptor agonist	GABRA1|GABRA2|GABRA3|GABRA5|GABRB2|GABRG2			1.09	1.2	1.14	0.94	0.99	0.89	1143	0.0551	0.94	0.05	0.9	0.998	0.211	0.681	-0.203	0.00464	0.24
ONC0001433	SC-236	Preclinical	cyclooxygenase inhibitor	PTGS2			0.98	1.05	1.58	0.98	1.01	1.01	1203	0.328	1	0.0173	0.969	1	0.548	0.978	-0.203	0.198	0.708
ONC0003329	IVERMECTIN	Launched	benzodiazepine receptor agonist	CHRNA7|P2RX7	infectious disease	gastrointestinal roundworms|lungworms|cattle grubs|mites|lice|horn flies	0.91	0.86	1.37	0.64	1.02	0.87	1047	0.281	0.843	0.191	0.637	0.909	0.0109	0.0753	-0.203	0.183	0.702
ONC0000995	Parecoxib	Launched	cyclooxygenase inhibitor	LTF	neurology/psychiatry	pain relief	1.29	1.02	1.51	1.07	1.04	1.1	1273	0.245	1.07	0.03	0.994	1	0.885	1	-0.203	0.143	0.653
ONC0001171	Luminol	NA	NA	NA	NA	NA	1.11	1.15	1.19	0.97	0.85	1.02	1.15	0.04	0.947	0.0874	0.911	1	0.242	0.735	-0.203	0.0197	0.37
ONC0005312	PHENOTHIAZINE	Preclinical	dopamine receptor antagonist				1.3	1.01	1.12	0.76	0.94	1.12	1143	0.146	0.94	0.18	0.9	0.998	0.211	0.681	-0.203	0.103	0.614
ONC0001163	PRT4165	Preclinical	polycomb repressive complex inhibitor	PRC1			0.99	1.01	1.19	0.82	0.63	1.13	1063	0.11	0.86	0.252	0.695	0.93	0.0209	0.132	-0.203	0.149	0.66
ONC0004555	PIK-75	NA	NA	NA	NA	NA	0.23	0.09	0.03	-0.09	-0.18	0.02	0.117	0.103	-0.083	0.1	3.78e-18	4.26e-16	5.95e-62	4.79e-59	-0.2	0.0366	0.455
ONC0003765	picolinic-acid	Phase 2	chelating agent				1.18	1	1.28	0.96	0.95	0.95	1153	0.142	0.953	0.00577	0.916	1	0.275	0.784	-0.2	0.0672	0.565
ONC0003772	chlorothymol	Launched					1.01	1.3	0.93	0.92	0.8	0.92	1.08	0.195	0.88	0.0693	0.749	0.947	0.042	0.232	-0.2	0.105	0.616
ONC0003911	FENOFIBRIC ACID	NA	NA	NA	NA	NA	0.88	1.03	1.1	0.34	1.02	1.05	1003	0.112	0.803	0.402	0.473	0.837	0.00181	0.0153	-0.2	0.242	0.752
ONC0000697	NEFOPAM	Launched	cyclooxygenase inhibitor		neurology/psychiatry	pain relief	1.1	1.07	1.22	0.99	0.8	1	1.13	0.0794	0.93	0.113	0.876	0.99	0.169	0.607	-0.2	0.0364	0.455
ONC0002666	XD-14	Preclinical	bromodomain inhibitor	BRD2|BRD3|BRD4|BRDT			1	1.46	0.92	1.01	0.87	0.9	1127	0.291	0.927	0.0737	0.869	0.988	0.157	0.579	-0.2	0.178	0.695
ONC0000190	A-939572	Preclinical	stearoyl-CoA desaturase inhibitor	SCD			1.4	0.96	1.24	0.92	0.93	1.15	1.2	0.223	1	0.13	0.966	1	0.548	0.978	-0.2	0.133	0.637
ONC0002412	DICLORALUREA	Preclinical					1.15	1.13	1.23	0.93	0.99	0.99	1.17	0.0529	0.97	0.0346	0.938	1	0.366	0.877	-0.2	0.00412	0.23
ONC0001662	CP-471474	Preclinical	matrix metalloprotease inhibitor	MMP1|MMP13|MMP2|MMP3|MMP9			1.1	1	0.99	0.79	0.81	0.89	1.03	0.0608	0.83	0.0529	0.575	0.879	0.00624	0.0466	-0.2	0.00661	0.275
ONC0001435	PD-166285	Preclinical	SRC inhibitor	EGFR|FGFR1|PDGFRB|PKMYT1|SRC|WEE1			0.24	0.33	0.04	0.01	-0.09	0.09	0.203	0.148	0.003	0.0902	3.89e-15	2.64e-13	1.07e-52	2.01e-50	-0.2	0.0659	0.561
ONC0005616	levomepromazine	Launched	dopamine receptor antagonist	ADRA1A|ADRA1B|ADRA1D|ADRA2A|ADRA2B|ADRA2C|CHRM1|CHRM2|CHRM3|CHRM4|CHRM5|DRD1|DRD2|DRD3|DRD4|DRD5|HRH1|HTR2A|HTR2C	neurology/psychiatry|gastroenterology	psychosis|schizophrenia|bipolar disorder|nausea|insomnia	1.1	1.01	0.84	1.03	0.48	0.84	0.983	0.132	0.783	0.279	0.398	0.792	0.000648	0.00581	-0.2	0.174	0.689
ONC0001536	dorsomorphin	Preclinical	AMPK inhibitor	ACVR1|BMPR1A|BMPR1B|EPHA2|FKBP1A|FLT1|FLT3|KDR|LCK|MKNK1|PRKAA1|RPS6KA1|SRC			0.99	0.96	1.17	0.87	0.65	1	1.04	0.114	0.84	0.177	0.613	0.897	0.00954	0.0666	-0.2	0.0935	0.606
ONC0003335	DACTINOMYCIN	Launched	RNA polymerase inhibitor	POLR2A	oncology	testicular carcinoma|Wilm's tumor|rhabdomyosarcoma|Ewing's sarcoma|gestational trophoblastic disease (GTD)	0.07	0.39	0.44	0.11	0.07	0.12	0.3	0.201	0.1	0.0265	3.95e-12	1.87e-10	2.78e-43	1.98e-41	-0.2	0.113	0.623
ONC0000961	Artemether	Launched	antimalarial agent	ATP1A1	infectious disease	malaria	1	1.14	1.11	0.94	0.88	0.83	1083	0.0737	0.883	0.0551	0.759	0.95	0.0468	0.252	-0.2	0.0113	0.311
ONC0004669	Rasagiline mesylate	NA	NA	NA	NA	NA	1.31	1.26	0.87	0.92	0.99	0.94	1147	0.241	0.95	0.0361	0.906	1	0.258	0.761	-0.197	0.146	0.653
ONC0004681	ABT-751 (E7010)	NA	NA	NA	NA	NA	0.91	0.76	0.75	0.67	0.49	0.67	0.807	0.0896	0.61	0.104	0.025	0.207	1.97e-09	2.8e-08	-0.197	0.0347	0.441
ONC0004091	NIFURSOL	Launched	bacterial DNA inhibitor				1.06	1.11	0.91	1.09	0.34	1.06	1027	0.104	0.83	0.425	0.563	0.874	0.00624	0.0466	-0.197	0.255	0.762
ONC0003593	LY2183240	Preclinical	FAAH inhibitor|FAAH reuptake inhibitor	FAAH			1.01	1.02	0.94	0.79	0.64	0.95	0.99	0.0436	0.793	0.155	0.423	0.811	0.0011	0.0095	-0.197	0.0756	0.58
ONC0004362	PF-00562271	NA	NA	NA	NA	NA	0.8	0.81	0.71	0.55	0.51	0.67	0.773	0.0551	0.577	0.0833	0.0113	0.115	7.74e-11	1.17e-09	-0.197	0.0168	0.353
ONC0004378	UNC1999	Preclinical	histone lysine methyltransferase inhibitor	EZH2			1.02	1.31	0.99	0.86	0.94	0.93	1107	0.177	0.91	0.0436	0.823	0.974	0.103	0.446	-0.197	0.0941	0.606
ONC0004482	Vanillin	NA	NA	NA	NA	NA	0.97	1.2	1.13	0.84	0.9	0.97	1.1	0.118	0.903	0.0651	0.806	0.968	0.0856	0.393	-0.197	0.0412	0.476
ONC0005037	PYR-41	Preclinical	ubiquitin activating enzyme inhibitor				1.2	1.51	1.33	1.08	1.25	1.12	1347	0.156	1.15	0.0889	0.999	1	0.992	1	-0.197	0.0742	0.58
ONC0002546	DPCPX	Phase 1	adenosine receptor antagonist	ADORA1|ADORA2A|ADORA2B|ADORA3			1.05	1.11	0.97	0.93	0.73	0.88	1043	0.0702	0.847	0.104	0.625	0.903	0.0125	0.0846	-0.197	0.0308	0.418
ONC0002854	TRIMIPRAMINE MALEATE	NA	NA	NA	NA	NA	1.07	1.41	0.99	0.91	1.04	0.93	1157	0.223	0.96	0.07	0.921	1	0.31	0.826	-0.197	0.131	0.634
ONC0000144	kaempferol	Preclinical	bone resorption inhibitor|estrogen-related receptor inverse agonist	AKR1B1|ALOX15B|ALOX5|AR|CYP1B1|GLO1|HSD17B1|UGT3A1			1.02	1.36	0.97	0.85	0.99	0.92	1117	0.212	0.92	0.07	0.847	0.98	0.133	0.526	-0.197	0.123	0.63
ONC0001607	IPAG	Preclinical					1.39	0.99	0.87	0.82	0.78	1.06	1083	0.272	0.887	0.151	0.759	0.95	0.0521	0.274	-0.197	0.176	0.691
ONC0002349	clebopride	Launched	dopamine receptor antagonist	ACHE|DRD2	gastroenterology	nausea	0.82	1.12	1.03	0.82	0.78	0.78	0.99	0.154	0.793	0.0231	0.423	0.811	0.0011	0.0095	-0.197	0.0773	0.582
ONC0002759	Erythritol	Launched					1.39	1.33	0.9	0.99	0.99	1.05	1207	0.267	1.01	0.0346	0.971	1	0.608	0.997	-0.197	0.165	0.683
ONC0000027	CZC24832	Preclinical	PI3K inhibitor	PIK3CG			1.06	1.09	1.29	1.03	0.74	1.08	1147	0.125	0.95	0.184	0.906	1	0.258	0.761	-0.197	0.105	0.616
ONC0001031	ML324	Preclinical	histone lysine demethylase inhibitor	KDM4A			0.98	1.33	1.25	0.99	1.02	0.96	1187	0.183	0.99	0.03	0.955	1	0.487	0.945	-0.197	0.101	0.612
ONC0005317	TRIAMCINOLONE	Launched	glucocorticoid receptor agonist	NR3C1	dermatology	corticosteroid-responsive dermatoses	1.45	0.94	1.29	0.98	1.02	1.09	1227	0.261	1.03	0.0557	0.981	1	0.72	1	-0.197	0.16	0.674
ONC0002001	Ginsenoside Rg3	NA	NA	NA	NA	NA	1.29	1.31	1.07	1.09	0.98	1.01	1223	0.133	1027	0.0569	0.98	1	0.703	1	-0.197	0.0548	0.532
ONC0001164	Artemotil	Launched			infectious disease	malaria	1.03	1.47	0.95	0.8	1	1.06	1.15	0.28	0.953	0.136	0.911	1	0.275	0.784	-0.197	0.178	0.695
ONC0002981	asymmetrical-dimethylarginine	Phase 1	nitric oxide synthase inhibitor	NOS2|NOS3			1.03	1.17	1.08	0.99	0.85	0.85	1093	0.0709	0.897	0.0808	0.788	0.963	0.0706	0.343	-0.197	0.0174	0.353
ONC0004544	LY3009120	Phase 1	RAF inhibitor	BRAF|RAF1			0.48	0.96	0.98	0.44	0.72	0.68	0.807	0.283	0.613	0.151	0.025	0.207	2.68e-09	3.77e-08	-0.193	0.186	0.704
ONC0004357	PNU-22394	Phase 2	serotonin receptor agonist	HTR2A|HTR2B|HTR2C|MAOA|MAOB			1.44	1.16	1.08	1.09	0.97	1.04	1227	0.189	1033	0.0603	0.981	1	0.737	1	-0.193	0.106	0.617
ONC0003561	JTE-907	Phase 1	cannabinoid receptor inverse agonist	CNR2			0.9	0.77	1.1	0.67	0.66	0.86	0.923	0.166	0.73	0.113	0.201	0.653	2.69e-05	0.000283	-0.193	0.0902	0.604
ONC0005111	Aclidinium Bromide	NA	NA	NA	NA	NA	1.19	1.05	1.36	1.01	0.99	1.02	1.2	0.155	1007	0.0153	0.966	1	0.588	0.993	-0.193	0.0813	0.584
ONC0003651	JTC-801	Phase 2	opioid receptor antagonist	OPRL1			1	1.33	0.87	0.81	0.98	0.83	1067	0.237	0.873	0.0929	0.707	0.935	0.0336	0.195	-0.193	0.146	0.653
ONC0000766	Topotecan (Hydrochloride)	NA	NA	NA	NA	NA	0.47	0.39	0.36	0.15	0.31	0.18	0.407	0.0569	0.213	0.085	3.07e-09	1.05e-07	1.83e-33	6.77e-32	-0.193	0.0187	0.368
ONC0000137	RS-45041-190	Preclinical	imidazoline receptor agonist				1.06	1.35	1.14	1.04	0.81	1.12	1183	0.15	0.99	0.161	0.952	1	0.487	0.945	-0.193	0.101	0.614
ONC0002323	PIROCTONE OLAMINE	NA	NA	NA	NA	NA	0.47	0.25	0.21	0.08	0.17	0.1	0.31	0.14	0.117	0.0473	7.71e-12	3.44e-10	9.35e-42	5.92e-40	-0.193	0.064	0.558
ONC0005574	Sodium stibogluconate	NA	NA	NA	NA	NA	1.27	0.84	1.27	1	0.87	0.93	1127	0.248	0.933	0.0651	0.869	0.988	0.182	0.63	-0.193	0.154	0.664
ONC0000822	AZ191	Preclinical	DYRK inhibitor	DYRK1B			0.84	0.89	0.96	0.7	0.65	0.76	0.897	0.0603	0.703	0.0551	0.137	0.55	4.31e-06	4.87e-05	-0.193	0.00754	0.283
ONC0002808	Titanocene dichloride	NA	NA	NA	NA	NA	1.04	1.52	1.02	1.02	1	0.98	1193	0.283	1	0.02	0.961	1	0.548	0.978	-0.193	0.179	0.695
ONC0000514	PHENELZINE SULFATE	NA	NA	NA	NA	NA	0.83	1.36	1.3	1.12	0.8	0.99	1163	0.29	0.97	0.161	0.93	1	0.366	0.877	-0.193	0.192	0.706
ONC0000980	AI-10-49	Preclinical	core binding factor inhibitor	CBFB			0.33	0.52	0.56	0.24	0.39	0.2	0.47	0.123	0.277	0.1	9.8e-08	2.75e-06	1.5e-28	4.41e-27	-0.193	0.0525	0.523
ONC0001791	Chidamide	Launched	HDAC inhibitor	HDAC10|HDAC3	hematologic malignancy	peripheral T-cell lymphoma (PTCL)	0.86	0.82	0.87	0.65	0.54	0.78	0.85	0.0265	0.657	0.12	0.0614	0.36	1.18e-07	1.5e-06	-0.193	0.051	0.517
ONC0001739	CP-339818	Preclinical	potassium channel blocker	KCNA3			1.06	1.12	1.08	0.84	0.93	0.91	1087	0.0306	0.893	0.0473	0.769	0.954	0.064	0.318	-0.193	0.00323	0.205
ONC0005393	PD-118057	Preclinical	potassium channel activator	KCNH2			0.89	1.04	1.42	0.94	0.92	0.91	1117	0.273	0.923	0.0153	0.847	0.98	0.145	0.552	-0.193	0.172	0.687
ONC0003697	isotiquimide	Phase 1					0.91	1.55	1.19	0.99	0.99	1.1	1217	0.321	1027	0.0635	0.977	1	0.703	1	-0.19	0.207	0.717
ONC0004186	CEPHARANTHINE	Phase 2	NFkB pathway inhibitor				1.14	0.96	0.9	0.84	0.88	0.71	1	0.125	0.81	0.0889	0.461	0.831	0.00251	0.0205	-0.19	0.0529	0.523
ONC0003920	BEKANAMYCIN SULFATE	NA	NA	NA	NA	NA	1.26	1.11	1.13	1.02	1.03	0.88	1167	0.0814	0.977	0.0839	0.934	1	0.406	0.902	-0.19	0.0241	0.391
ONC0002668	cis-Urocanic acid	NA	NA	NA	NA	NA	1.16	0.99	1.36	1.09	0.88	0.97	1.17	0.185	0.98	0.105	0.938	1	0.426	0.919	-0.19	0.108	0.621
ONC0000263	NVP-ADW742	Preclinical	insulin growth factor receptor inhibitor	IGF1R			1.29	1.16	1.03	1	0.88	1.03	1.16	0.13	0.97	0.0794	0.925	1	0.366	0.877	-0.19	0.0555	0.532
ONC0002630	RWJ-67657	Phase 1	MAP kinase inhibitor	MAPK14|PTGS2			0.95	0.93	0.78	0.81	0.56	0.72	0.887	0.0929	0.697	0.127	0.117	0.507	2.66e-06	3.04e-05	-0.19	0.0552	0.532
ONC0000293	CYTARABINE	Launched	ribonucleotide reductase inhibitor	POLA1|POLB|POLD1|POLE	hematologic malignancy	acute lymphoblastic leukemia (ALL)|chronic lymphocytic leukemia (CLL)|acute myeloid leukemia (AML)|non-Hodgkin lymphoma (NHL)	0.37	0.48	0.45	0.2	0.26	0.27	0.433	0.0569	0.243	0.0379	1.38e-08	4.31e-07	4.37e-31	1.41e-29	-0.19	0.006	0.26
ONC0000159	GW-843682X	Preclinical	PLK inhibitor	PLK1|PLK3			0.37	0.54	0.53	0.26	0.34	0.27	0.48	0.0954	0.29	0.0436	1.64e-07	4.48e-06	1.44e-27	3.98e-26	-0.19	0.0284	0.41
ONC0005500	SOLIFENACIN SUCCINATE	NA	NA	NA	NA	NA	1.28	1.29	0.95	0.93	1.02	1	1173	0.193	0.983	0.0473	0.942	1	0.446	0.932	-0.19	0.113	0.623
ONC0003245	BUSULFAN	Launched	DNA inhibitor		hematologic malignancy	chronic myeloid leukemia (CML)	1.02	1.56	1.09	1.01	1.08	1.01	1223	0.294	1033	0.0404	0.98	1	0.737	1	-0.19	0.189	0.705
ONC0001046	YM-155	Phase 2	survivin inhibitor	BIRC5			0.26	0.27	0.4	0.04	0.19	0.13	0.31	0.0781	0.12	0.0755	7.71e-12	3.44e-10	1.87e-41	1.16e-39	-0.19	0.0194	0.37
ONC0005404	sumanirole	Phase 3	dopamine receptor agonist	DRD2			1.22	1.1	1.33	1.06	0.87	1.15	1217	0.115	1027	0.143	0.977	1	0.703	1	-0.19	0.0753	0.58
ONC0002176	practolol	Withdrawn	adrenergic receptor antagonist	ADRB1			1.11	1.12	1.3	1	0.98	0.99	1177	0.107	0.99	0.01	0.946	1	0.487	0.945	-0.187	0.0465	0.497
ONC0005208	20-Hydroxyecdysone	Phase 2	ecdysone receptor modulator				0.95	1.3	1.29	1.01	0.91	1.06	1.18	0.199	0.993	0.0764	0.949	1	0.507	0.957	-0.187	0.121	0.63
ONC0004163	PROADIFEN HYDROCHLORIDE	NA	NA	NA	NA	NA	1.61	1.1	1.03	1.16	1.02	1	1247	0.317	1.06	0.0872	0.989	1	0.852	1	-0.187	0.208	0.719
ONC0003578	NS-9283	Preclinical	acetylcholine receptor allosteric modulator	CHRNA4			0.98	0.93	0.95	0.99	0.66	0.65	0.953	0.0252	0.767	0.193	0.292	0.741	0.000257	0.00241	-0.187	0.118	0.63
ONC0004595	NVP-BHG712	Preclinical	ephrin inhibitor	EPHB4			0.94	0.62	0.85	0.64	0.5	0.71	0.803	0.165	0.617	0.107	0.0231	0.199	3.64e-09	5.06e-08	-0.187	0.0936	0.606
ONC0004654	Naringin (Naringoside)	NA	NA	NA	NA	NA	0.99	0.84	1.28	0.99	0.42	1.14	1037	0.224	0.85	0.38	0.6	0.889	0.0143	0.0945	-0.187	0.256	0.765
ONC0003676	trans-2-Undecenoic acid	NA	NA	NA	NA	NA	1.17	1.24	1.1	0.94	1	1.01	1.17	0.07	0.983	0.0379	0.938	1	0.446	0.932	-0.187	0.0128	0.318
ONC0002521	N6022	Phase 1/Phase 2	alcohol dehydrogenase inhibitor	ADH5			1.13	1.01	1.06	0.91	0.92	0.81	1067	0.0603	0.88	0.0608	0.707	0.935	0.042	0.232	-0.187	0.00976	0.296
ONC0003028	CCG-1423	Preclinical	apoptosis stimulant	RHOC|SRF			1.42	1.1	1.18	1.06	0.99	1.09	1233	0.167	1047	0.0513	0.984	1	0.799	1	-0.187	0.0921	0.606
ONC0003051	lofepramine	Launched	norepinephrine reuptake inhibitor|serotoninâ€“norepinephrine reuptake inhibitor (SNRI)	HTR1A|SLC6A2|SLC6A4	neurology/psychiatry	depression	1.12	1.11	1.23	1.03	1.02	0.85	1153	0.0666	0.967	0.101	0.916	1	0.347	0.857	-0.187	0.0325	0.427
ONC0002690	Tasimelteon	Launched	melatonin receptor agonist	MTNR1A|MTNR1B	neurology/psychiatry	Non-24-Hour Sleep-Wake Disorder	1.39	1.23	0.84	0.96	0.93	1.01	1153	0.283	0.967	0.0404	0.916	1	0.347	0.857	-0.187	0.186	0.703
ONC0000777	Nampt-IN-1	Preclinical					0.53	0.28	0.39	0.08	0.3	0.26	0.4	0.125	0.213	0.117	2.09e-09	7.25e-08	1.83e-33	6.77e-32	-0.187	0.0665	0.563
ONC0002557	CDPPB	Preclinical	glutamate receptor positive allosteric modulator	GRM5			1	1.03	1.16	0.91	0.86	0.86	1063	0.085	0.877	0.0289	0.695	0.93	0.0376	0.214	-0.187	0.0253	0.397
ONC0001375	L-368899	Phase 1	oxytocin receptor antagonist	AVPR1A|AVPR2|OXTR			1.09	1.17	1.09	0.99	0.89	0.91	1117	0.0462	0.93	0.0529	0.847	0.98	0.169	0.607	-0.187	0.00522	0.252
ONC0001343	TC-S-7003	Preclinical	SRC inhibitor	LCK			0.2	0.64	0.24	0.14	0.06	0.32	0.36	0.243	0.173	0.133	1.89e-10	7.11e-09	8.85e-37	3.99e-35	-0.187	0.163	0.68
ONC0000098	DDR1-IN-1	Preclinical	discoidin domain receptor inhibitor	DDR1|DDR2			1	1.1	0.96	0.91	0.58	1.01	1.02	0.0721	0.833	0.225	0.537	0.863	0.00721	0.0527	-0.187	0.142	0.652
ONC0001256	Olmesartan	Launched	angiotensin receptor antagonist	AGTR1	cardiology	hypertension	1.31	1.19	1.11	1.06	0.98	1.01	1203	0.101	1017	0.0404	0.969	1	0.647	1	-0.187	0.0346	0.441
ONC0001415	BF2.649	NA	NA	NA	NA	NA	1.14	0.96	1.23	0.91	0.87	0.99	1.11	0.137	0.923	0.0611	0.832	0.975	0.145	0.552	-0.187	0.0643	0.558
ONC0005523	Diacetoxyscirpenol	NA	NA	NA	NA	NA	0.42	0.26	0.2	0.21	0.14	-0.03	0.293	0.114	0.107	0.123	2.52e-12	1.23e-10	1.14e-42	7.86e-41	-0.187	0.0634	0.558
ONC0005534	Cytochalasin B	NA	NA	NA	NA	NA	1.23	1.01	0.81	0.85	0.64	1	1017	0.21	0.83	0.181	0.525	0.861	0.00624	0.0466	-0.187	0.155	0.664
ONC0005468	Acivicin	Phase 2	gamma glutamyltransferase inhibitor	CTPS1			1.43	1.13	0.99	0.97	0.96	1.06	1183	0.225	0.997	0.0551	0.952	1	0.528	0.968	-0.187	0.142	0.652
ONC0003106	clofarabine	Launched	ribonucleotide reductase inhibitor	POLA1|POLD1|POLE|RRM1|RRM2|RRM2B	hematologic malignancy	acute lymphoblastic leukemia (ALL)	0.31	0.35	0.52	0.27	0.07	0.28	0.393	0.112	0.207	0.118	1.41e-09	5.04e-08	5.26e-34	2.01e-32	-0.187	0.059	0.541
ONC0003165	QUINAPRIL	Launched	angiotensin converting enzyme inhibitor	ACE	cardiology	hypertension|congestive heart failure|angioedema	1.34	1.12	1.13	1.02	0.99	1.02	1197	0.124	1.01	0.0173	0.964	1	0.608	0.997	-0.187	0.0593	0.542
ONC0000074	EC-144	Preclinical	HSP inhibitor	HSP90AA1|HSP90AB1			0.21	0.19	0.29	0.17	0.02	-0.06	0.23	0.0529	0.043	0.117	2.86e-14	1.77e-12	1.1e-48	1.27e-46	-0.187	0.0462	0.497
ONC0003336	KHELLIN	Phase 2	vasodilator				1.05	1.23	1.02	0.84	1.08	0.82	1.1	0.114	0.913	0.145	0.806	0.968	0.112	0.472	-0.187	0.0788	0.582
ONC0003267	Asiatic acid	NA	NA	NA	NA	NA	0.61	1.5	1.27	0.85	1.02	0.95	1127	0.462	0.94	0.0854	0.869	0.988	0.211	0.681	-0.187	0.279	0.789
ONC0001020	RBC8	Preclinical	Ral GTPase inhibitor	RALA|RALB			1.11	1.09	1.51	1.11	1.06	0.98	1237	0.237	1.05	0.0656	0.985	1	0.814	1	-0.187	0.152	0.664
ONC0000935	Nastorazepide	Phase 2	CCK receptor antagonist	CCKBR			1.61	1.15	1.18	1.15	1.01	1.22	1313	0.257	1127	0.107	0.998	1	0.981	1	-0.187	0.17	0.687
ONC0000903	NBQX	Preclinical	glutamate receptor antagonist	GRIA1|GRIA2|GRIA3|GRIA4|GRIK1|GRIN1|GRIN2A|GRIN2B			1.05	0.88	1.58	1.06	1.04	0.85	1.17	0.365	0.983	0.116	0.938	1	0.446	0.932	-0.187	0.237	0.747
ONC0000937	GF109203X	Preclinical	PKC inhibitor	PDPK1|PIM1|PRKCI|PRKCZ			1.01	1.06	0.74	0.57	0.92	0.76	0.937	0.172	0.75	0.175	0.239	0.699	9.56e-05	0.000951	-0.187	0.129	0.632
ONC0001833	Tedizolid (phosphate)	NA	NA	NA	NA	NA	0.81	1.54	1.25	1.03	0.99	1.02	1.2	0.368	1013	0.0208	0.966	1	0.628	1	-0.187	0.236	0.746
ONC0005409	tiaprofenic-acid	Launched	cyclooxygenase inhibitor	PTGS2	rheumatology	rheumatoid arthritis	0.97	1.61	0.86	0.88	1.01	0.99	1147	0.405	0.96	0.07	0.906	1	0.31	0.826	-0.187	0.255	0.762
ONC0004696	VX-680 (MK-0457, Tozasertib)	NA	NA	NA	NA	NA	0.54	0.35	0.89	0.34	0.35	0.54	0.593	0.274	0.41	0.113	2.97e-05	0.000653	1.51e-19	3.29e-18	-0.183	0.186	0.703
ONC0003577	suritozole	Phase 2	GABA receptor inverse agonist	GABBR1			1.06	1.34	0.83	0.9	0.9	0.88	1077	0.255	0.893	0.0115	0.739	0.947	0.064	0.318	-0.183	0.17	0.687
ONC0003588	ABT-202	Phase 1	acetylcholine receptor agonist				0.98	1.33	1.23	0.97	0.93	1.09	1.18	0.18	0.997	0.0833	0.949	1	0.528	0.968	-0.183	0.107	0.62
ONC0003590	DC-260126	Preclinical	free fatty acid receptor antagonist	FFAR1			1.02	1.33	1.22	1.03	0.97	1.02	1.19	0.157	1007	0.0321	0.958	1	0.588	0.993	-0.183	0.0882	0.597
ONC0004872	MK-1775	Phase 2	WEE1 kinase inhibitor	WEE1			0.23	0.33	0.44	0.13	0.2	0.12	0.333	0.105	0.15	0.0436	3.53e-11	1.45e-09	8.67e-39	4.69e-37	-0.183	0.039	0.47
ONC0004651	PD173074	Preclinical	FGFR inhibitor|VEGFR inhibitor	FGFR1|FGFR2|FGFR3|FGFR4|FLT1|FLT4|KDR|PDGFRA|PDGFRB			1.3	1.06	1.15	0.97	1.06	0.93	1.17	0.121	0.987	0.0666	0.938	1	0.466	0.944	-0.183	0.0512	0.517
ONC0003620	proxyfan	Preclinical	histamine receptor modulator	HRH3			0.98	0.88	1.05	0.88	0.83	0.65	0.97	0.0854	0.787	0.121	0.349	0.774	0.000774	0.00688	-0.183	0.0531	0.524
ONC0003834	VLX600	Phase 1	antitumor agent|ubiquitin C-terminal hydrolase inhibitor	TP53|USP14			0.21	0.53	0.57	0.06	0.27	0.43	0.437	0.197	0.253	0.186	1.66e-08	5.07e-07	2.59e-30	8.04e-29	-0.183	0.153	0.664
ONC0003847	ezutromid	Phase 2	utrophin enhancer	UTRN			0.94	1.26	0.58	0.77	0.69	0.77	0.927	0.34	0.743	0.0462	0.21	0.668	6.33e-05	0.000644	-0.183	0.225	0.735
ONC0003866	broxaterol	Phase 3	adrenergic receptor agonist	ADRB2			1	0.95	1.42	0.99	0.87	0.96	1123	0.258	0.94	0.0624	0.862	0.986	0.211	0.681	-0.183	0.172	0.687
ONC0004271	Pleconaril	Phase 3					0.95	1.21	1.71	1.13	1.24	0.95	1.29	0.386	1107	0.146	0.996	1	0.961	1	-0.183	0.253	0.76
ONC0002643	DG-172	Preclinical	PPAR receptor inverse agonist	PPARD			1.27	1.21	1.11	1.08	0.97	0.99	1197	0.0808	1013	0.0586	0.964	1	0.628	1	-0.183	0.0191	0.37
ONC0002676	KF-38789	Preclinical	P selectin inhibitor	SELP			0.96	0.9	0.83	0.64	0.67	0.83	0.897	0.0651	0.713	0.102	0.137	0.55	8.73e-06	9.69e-05	-0.183	0.0347	0.441
ONC0002276	PU-H71	Phase 1	HSP inhibitor	HSP90AA1			1.21	0.7	0.6	0.65	0.61	0.7	0.837	0.327	0.653	0.0451	0.0473	0.312	8.97e-08	1.15e-06	-0.183	0.217	0.727
ONC0000358	TUG-891	Preclinical	free fatty acid receptor agonist	FFAR4			1.19	0.99	1.16	0.98	0.99	0.82	1113	0.108	0.93	0.0954	0.84	0.979	0.169	0.607	-0.183	0.0466	0.497
ONC0001259	MC1568	Preclinical	HDAC inhibitor	HDAC2			1.01	1.17	1.11	1.1	0.87	0.77	1097	0.0808	0.913	0.169	0.797	0.966	0.112	0.472	-0.183	0.0966	0.611
ONC0000107	ZK-164015	Preclinical	estrogen receptor antagonist	ESR1|ESR2			0.84	1.04	0.71	0.74	0.6	0.7	0.863	0.166	0.68	0.0721	0.0785	0.415	7.59e-07	9.02e-06	-0.183	0.0935	0.606
ONC0005618	TamsulosinHCl	NA	NA	NA	NA	NA	1.15	1.16	1.32	1	1.01	1.07	1.21	0.0954	1027	0.0379	0.973	1	0.703	1	-0.183	0.0321	0.426
ONC0002053	ACTB-1003	Phase 1	FGFR inhibitor|VEGFR inhibitor	KDR|TEK			0.73	0.98	0.67	0.68	0.57	0.58	0.793	0.164	0.61	0.0608	0.0183	0.166	1.97e-09	2.8e-08	-0.183	0.0921	0.606
ONC0003343	Mivacurium chloride	NA	NA	NA	NA	NA	0.82	1.4	1.27	1.01	0.93	1	1163	0.304	0.98	0.0436	0.93	1	0.426	0.919	-0.183	0.203	0.71
ONC0002022	Vincristine (sulfate)	NA	NA	NA	NA	NA	0.41	0.36	0.56	0.19	0.3	0.29	0.443	0.104	0.26	0.0608	2.38e-08	7.21e-07	8.35e-30	2.58e-28	-0.183	0.0362	0.455
ONC0005286	TRICLABENDAZOLE	Launched	microtubule inhibitor	DNMT1	infectious disease	tapeworm	1	1.16	0.91	0.98	0.62	0.92	1023	0.127	0.84	0.193	0.55	0.868	0.00954	0.0666	-0.183	0.126	0.632
ONC0005323	PAROXYPROPIONE	Launched	gonadotropin inhibitor				1.05	1.33	1.14	1.05	0.81	1.11	1173	0.143	0.99	0.159	0.942	1	0.487	0.945	-0.183	0.106	0.617
ONC0001204	IOX1	Preclinical	histone demethylase inhibitor	EGLN1|KDM3A|KDM4C|KDM6B			1.55	0.93	1	0.98	0.86	1.09	1.16	0.34	0.977	0.115	0.925	1	0.406	0.902	-0.183	0.227	0.738
ONC0004365	Tariquidar	Phase 3	P glycoprotein inhibitor	ABCB1			1.46	1.07	1.22	1.2	1	1.01	1.25	0.197	1.07	0.113	0.99	1	0.885	1	-0.18	0.129	0.632
ONC0003971	ITRACONAZOLE HYDROCHLORIDE	NA	NA	NA	NA	NA	1.1	1	1.25	0.95	0.95	0.91	1117	0.126	0.937	0.0231	0.847	0.98	0.196	0.658	-0.18	0.0636	0.558
ONC0005094	Quizartinib (AC220)	NA	NA	NA	NA	NA	0.89	1	1.07	1.07	0.71	0.64	0.987	0.0907	0.807	0.231	0.41	0.805	0.00214	0.0177	-0.18	0.155	0.664
ONC0004936	Eltrombopag olamine	NA	NA	NA	NA	NA	0.99	1.1	1.58	1.09	1.02	1.02	1223	0.314	1043	0.0404	0.98	1	0.785	1	-0.18	0.213	0.724
ONC0004949	Limonin	Preclinical	HIV protease inhibitor				0.99	1.2	1.32	1	1.01	0.96	1.17	0.167	0.99	0.0265	0.938	1	0.487	0.945	-0.18	0.1	0.611
ONC0005132	DMH1	Preclinical	ALK tyrosine kinase receptor inhibitor	ACVR1			1.08	1.14	1.12	1.04	0.96	0.8	1113	0.0306	0.933	0.122	0.84	0.979	0.182	0.63	-0.18	0.0589	0.541
ONC0005156	UNC669	Preclinical	L3MBTL antagonist	L3MBTL1			1.36	1.3	1.03	1.1	0.96	1.09	1.23	0.176	1.05	0.0781	0.983	1	0.814	1	-0.18	0.106	0.616
ONC0003903	FEBUXOSTAT	Launched	xanthine oxidase inhibitor	XDH	nephrology	hyperuricemia	1.02	1.21	0.96	0.91	0.83	0.91	1063	0.131	0.883	0.0462	0.695	0.93	0.0468	0.252	-0.18	0.0638	0.558
ONC0003345	AG-555	Preclinical	tyrosine kinase inhibitor	CDK2			0.95	1.23	1.06	0.78	1.01	0.91	1.08	0.141	0.9	0.115	0.749	0.947	0.0779	0.368	-0.18	0.0825	0.586
ONC0000219	antalarmin	Preclinical	corticotropin releasing factor receptor antagonist	CRHR1			1.02	1.24	1.42	1.08	1.02	1.04	1227	0.2	1047	0.0306	0.981	1	0.799	1	-0.18	0.129	0.632
ONC0002615	JNJ-26990990	Phase 2	anticonvulsant				1.15	1.09	1.06	1.01	0.71	1.04	1.1	0.0458	0.92	0.182	0.806	0.968	0.133	0.526	-0.18	0.113	0.623
ONC0002440	LORATADINE	Launched	histamine receptor antagonist	HRH1	allergy|neurology/psychiatry	allergic rhinitis|itching	1.22	1.26	0.95	0.98	1.02	0.89	1143	0.169	0.963	0.0666	0.9	0.998	0.329	0.839	-0.18	0.0987	0.611
ONC0002455	LANSOPRAZOLE	Launched	ATPase inhibitor	ATP4A|ATP4B	gastroenterology	heartburn	0.99	1.33	1.19	1	1.01	0.96	1.17	0.171	0.99	0.0265	0.938	1	0.487	0.945	-0.18	0.104	0.614
ONC0000401	LIMKi-3	Preclinical	LIM kinase inhibitor	LIMK1			0.98	1.36	1.09	0.85	0.99	1.05	1143	0.196	0.963	0.103	0.9	0.998	0.329	0.839	-0.18	0.126	0.632
ONC0000435	spiroxatrine	Preclinical	serotonin receptor antagonist	ADRA1A|ADRA1B|ADRA1D|ADRA2A|ADRA2B|ADRA2C|HTR1A|HTR2B			1.04	0.99	1.24	0.86	1	0.87	1.09	0.132	0.91	0.0781	0.779	0.959	0.103	0.446	-0.18	0.0643	0.558
ONC0001373	PNU-120596	Preclinical	acetylcholine receptor agonist	CHRNA7			1.03	1	1.2	0.87	0.94	0.88	1077	0.108	0.897	0.0379	0.739	0.947	0.0706	0.343	-0.18	0.0443	0.493
ONC0000584	SULINDAC	Launched	cyclooxygenase inhibitor	AKR1B1	rheumatology	osteoarthritis|rheumatoid arthritis|ankylosing spondylitis	0.88	1.31	1.07	0.84	0.89	0.99	1087	0.215	0.907	0.0764	0.769	0.954	0.0939	0.419	-0.18	0.141	0.652
ONC0000001	GPBAR-A	Preclinical	G protein-coupled receptor agonist	GPBAR1			1.21	1.2	1.13	0.96	1.02	1.02	1.18	0.0436	1	0.0346	0.949	1	0.548	0.978	-0.18	0.00289	0.198
ONC0001053	Ponesimod	Phase 3	sphingosine 1-phosphate receptor agonist	S1PR1			1.3	0.96	0.98	0.79	0.92	0.99	1.08	0.191	0.9	0.101	0.749	0.947	0.0779	0.368	-0.18	0.122	0.63
ONC0005363	gadoterate-meglumine	Launched	radiopaque medium		radiology	MRI contrast agent	1.13	1.08	1.14	0.73	1.09	0.99	1117	0.0321	0.937	0.186	0.847	0.98	0.196	0.658	-0.18	0.117	0.63
ONC0005424	IDAZOXAN HYDROCHLORIDE	NA	NA	NA	NA	NA	1.02	0.88	1.3	0.97	0.69	1	1067	0.214	0.887	0.171	0.707	0.935	0.0521	0.274	-0.18	0.161	0.674
ONC0001194	SU9516	Preclinical	CDK inhibitor	CDK1|CDK2|CDK4|CDK5			0.81	0.99	1	0.66	0.82	0.78	0.933	0.107	0.753	0.0833	0.229	0.688	0.000117	0.00115	-0.18	0.0434	0.49
ONC0004084	FlUMAZENIL	Launched	benzodiazepine receptor antagonist	GABRA1|GABRA2|GABRA3|GABRA4|GABRA5|GABRA6|GABRB1|GABRB2|GABRB3|GABRD|GABRE|GABRG1|GABRG2|GABRG3|GABRP|GABRQ	neurology/psychiatry	sedative	1.52	0.82	1.2	0.98	1.05	0.98	1.18	0.35	1003	0.0404	0.949	1	0.568	0.985	-0.177	0.238	0.747
ONC0004849	Pranoprofen	Launched	cyclooxygenase inhibitor		neurology/psychiatry	pain relief	1.35	0.99	1.29	0.98	1.14	0.98	1.21	0.193	1033	0.0924	0.973	1	0.737	1	-0.177	0.126	0.632
ONC0004617	KU-60019	Preclinical	ATM kinase inhibitor	ATM			1.08	0.9	1.27	0.99	0.73	1	1083	0.185	0.907	0.153	0.759	0.95	0.0939	0.419	-0.177	0.137	0.644
ONC0003810	tesaglitazar	Phase 3	insulin sensitizer|PPAR receptor agonist	PPARA|PPARG			0.99	1	0.88	0.72	0.72	0.9	0.957	0.0666	0.78	0.104	0.303	0.751	0.000541	0.00491	-0.177	0.0396	0.471
ONC0002871	isoquinoline,-6,7-dimethoxy-1-methyl-1,2,3,4-tetrahydro,	Preclinical					1.13	1.05	1.24	0.71	1.14	1.04	1.14	0.0954	0.963	0.225	0.894	0.998	0.329	0.839	-0.177	0.154	0.664
ONC0003415	Pranidipine	Phase 2	calcium channel blocker	CACNA1C			1.08	1	0.95	0.92	0.81	0.77	1.01	0.0656	0.833	0.0777	0.499	0.851	0.00721	0.0527	-0.177	0.0205	0.37
ONC0000783	CHLOROTHIAZIDE	Launched	diuretic	CA1|CA2|CA4|SLC12A3	cardiology	hypertension	0.97	0.84	1.1	0.99	0.44	0.95	0.97	0.13	0.793	0.307	0.349	0.774	0.0011	0.0095	-0.177	0.216	0.727
ONC0000317	COLCHICINE	Launched	microtubule inhibitor	GLRA1|GLRA2|TUBA1A|TUBA1B|TUBA1C|TUBA3C|TUBA3D|TUBA3E|TUBA4A|TUBB|TUBB1|TUBB2A|TUBB2B|TUBB3|TUBB4A|TUBB4B|TUBB6|TUBB8	rheumatology|endocrinology	gout|fever	0.25	0.55	0.2	0.16	0.14	0.17	0.333	0.189	0.157	0.0153	3.53e-11	1.45e-09	3.29e-38	1.72e-36	-0.177	0.123	0.631
ONC0001252	WAY-170523	Preclinical	metalloproteinase inhibitor	MMP13			0.76	0.97	1.04	0.82	0.69	0.73	0.923	0.146	0.747	0.0666	0.201	0.653	7.79e-05	0.000786	-0.177	0.0793	0.583
ONC0001319	WH-4-023	Preclinical	SRC inhibitor	LCK|SRC			1.13	1.16	1.25	1	0.99	1.02	1.18	0.0624	1003	0.0153	0.949	1	0.568	0.985	-0.177	0.0165	0.353
ONC0001480	BS-181	Preclinical	CDK inhibitor	CDK7			0.93	1.02	1.1	0.89	0.69	0.94	1017	0.085	0.84	0.132	0.525	0.861	0.00954	0.0666	-0.177	0.0679	0.565
ONC0005481	REV-5901 / L-655,238	NA	NA	NA	NA	NA	0.93	1.61	0.98	1.01	1.02	0.96	1173	0.379	0.997	0.0321	0.942	1	0.528	0.968	-0.177	0.252	0.76
ONC0002811	NA	NA	NA	NA	NA	NA	0.96	1.24	1.03	0.76	1	0.94	1077	0.146	0.9	0.125	0.739	0.947	0.0779	0.368	-0.177	0.0939	0.606
ONC0003276	Bucillamine	Launched	immunosuppressant		rheumatology	rheumatoid arthritis	0.93	1.24	1.55	1.12	1.06	1.01	1.24	0.31	1063	0.0551	0.987	1	0.864	1	-0.177	0.214	0.725
ONC0000997	EN460	Preclinical	endoplasmic reticulum oxidation inhibitor	ERO1A			1.29	1.15	1.11	1.12	1.02	0.88	1183	0.0945	1007	0.121	0.952	1	0.588	0.993	-0.177	0.0602	0.545
ONC0000891	Oglemilast	Phase 2	phosphodiesterase inhibitor				1.22	1.3	1.06	0.98	1.1	0.97	1193	0.122	1017	0.0723	0.961	1	0.647	1	-0.177	0.0566	0.538
ONC0001225	Erdafitinib	Launched	FGFR inhibitor	FGFR1|FGFR2|FGFR3|FGFR4			1.12	1.05	1.16	0.89	0.97	0.94	1.11	0.0557	0.933	0.0404	0.832	0.975	0.182	0.63	-0.177	0.00692	0.28
ONC0005257	CHIR-98014	Preclinical	glycogen synthase kinase inhibitor	GSK3A|GSK3B			1.02	1.14	0.93	0.78	0.98	0.81	1.03	0.105	0.857	0.108	0.575	0.879	0.0184	0.118	-0.173	0.0587	0.541
ONC0003785	piperazinedione	Phase 2	DNA synthesis inhibitor				1.1	0.96	1.1	0.8	0.72	1.12	1053	0.0808	0.88	0.212	0.661	0.916	0.042	0.232	-0.173	0.145	0.653
ONC0002520	Trovirdine	Phase 1	non-nucleoside reverse transcriptase inhibitor				0.92	1.17	1.29	0.87	1.03	0.96	1127	0.189	0.953	0.0802	0.869	0.988	0.275	0.784	-0.173	0.125	0.632
ONC0002470	CIQ	Preclinical	glutamate receptor potentiator	GRIN2C|GRIN2D			1.07	1.27	1.12	1.02	1.09	0.83	1153	0.104	0.98	0.135	0.916	1	0.426	0.919	-0.173	0.0784	0.582
ONC0000747	AZD7687	Phase 1	diacylglycerol O acyltransferase inhibitor	DGAT1			1.26	1.22	1.33	1.18	1.04	1.07	1.27	0.0557	1097	0.0737	0.994	1	0.946	1	-0.173	0.0174	0.353
ONC0002640	N-MPPP	Preclinical	opioid receptor agonist				1.09	0.98	1.25	0.95	0.83	1.02	1107	0.136	0.933	0.0961	0.823	0.974	0.182	0.63	-0.173	0.0766	0.582
ONC0002594	D-delta-Tocopherol	Launched					1	0.94	1.23	0.96	0.78	0.91	1057	0.153	0.883	0.0929	0.673	0.923	0.0468	0.252	-0.173	0.092	0.606
ONC0002636	LY294002	Preclinical	DNA dependent protein kinase inhibitor|mTOR inhibitor|phosphodiesterase inhibitor|PI3K inhibitor|PLK inhibitor	AKT1|CHEK1|GSK3B|LCK|MAPK1|MAPK11|MAPK12|MAPK14|MAPK8|MTOR|PIK3CA|PIK3CB|PIK3CD|PIK3CG|PIM1|PLK1|PRKCA|PRKDC|ROCK1|RPS6KB1|SGK1			1.21	1	0.8	0.95	0.75	0.79	1003	0.205	0.83	0.106	0.473	0.837	0.00624	0.0466	-0.173	0.142	0.652
ONC0001337	TC-S-7006	Preclinical	MAP kinase inhibitor	MAP3K8			1.07	1.12	0.95	0.82	0.99	0.81	1047	0.0874	0.873	0.101	0.637	0.909	0.0336	0.195	-0.173	0.0447	0.493
ONC0000418	FLUMETHAZONE PIVALATE	NA	NA	NA	NA	NA	1.17	1.07	1.16	0.85	0.95	1.08	1133	0.0551	0.96	0.115	0.882	0.993	0.31	0.826	-0.173	0.0522	0.522
ONC0001301	Voreloxin (Hydrochloride)	NA	NA	NA	NA	NA	1.08	0.95	1.22	1.15	0.89	0.69	1083	0.135	0.91	0.231	0.759	0.95	0.103	0.446	-0.173	0.169	0.687
ONC0000148	ASP3026	Phase 1	ALK tyrosine kinase receptor inhibitor	ALK			0.95	1.18	1.24	1.11	0.92	0.82	1123	0.153	0.95	0.147	0.862	0.986	0.258	0.761	-0.173	0.115	0.628
ONC0005505	7-methylxanthine	Phase 2	adenosine receptor antagonist				1.16	1.2	1.1	0.91	1.01	1.02	1153	0.0503	0.98	0.0608	0.916	1	0.426	0.919	-0.173	0.0102	0.296
ONC0001472	bicuculline-(+)	Preclinical	GABA receptor antagonist	GABRA1|GABRA2|GABRA3|GABRA4|GABRA5|GABRA6|KCNN1			1.15	0.98	1.21	1.08	0.9	0.84	1113	0.119	0.94	0.125	0.84	0.979	0.211	0.681	-0.173	0.0787	0.582
ONC0001481	ibotenic-acid	Preclinical	glutamate receptor agonist	GRIN1			1.1	1.16	0.95	1.01	0.74	0.94	1.07	0.108	0.897	0.14	0.717	0.938	0.0706	0.343	-0.173	0.0848	0.594
ONC0002735	NA	NA	NA	NA	NA	NA	1.1	1.5	1.01	1	1	1.09	1203	0.261	1.03	0.052	0.969	1	0.72	1	-0.173	0.184	0.703
ONC0000612	PHENYLBUTAZONE	Withdrawn	cyclooxygenase inhibitor|prostanoid receptor antagonist	PTGIS|PTGS1|PTGS2			0.94	1.05	0.98	1.03	0.46	0.96	0.99	0.0557	0.817	0.311	0.423	0.811	0.00343	0.0276	-0.173	0.218	0.728
ONC0002100	Eslicarbazepine (acetate)	NA	NA	NA	NA	NA	1.16	1.33	1.11	1.05	0.98	1.05	1.2	0.115	1027	0.0404	0.966	1	0.703	1	-0.173	0.0544	0.531
ONC0003328	TARTARIC ACID	NA	NA	NA	NA	NA	0.97	1.02	1.46	1	1	0.93	1.15	0.27	0.977	0.0404	0.911	1	0.406	0.902	-0.173	0.191	0.705
ONC0001934	fosamprenavir	Launched	HIV protease inhibitor		infectious disease	human immunodeficiency virus (HIV-1)	1	0.98	0.91	0.99	0.7	0.68	0.963	0.0473	0.79	0.173	0.326	0.763	0.000922	0.00813	-0.173	0.11	0.622
ONC0001024	Etoposide	Launched	topoisomerase inhibitor	TOP2A|TOP2B	oncology	non-small cell lung cancer (NSCLC)	0.78	0.85	0.9	0.68	0.64	0.69	0.843	0.0603	0.67	0.0265	0.054	0.336	3.47e-07	4.26e-06	-0.173	0.012	0.318
ONC0001943	1-Aminocyclopropanecarboxylic acid	NA	NA	NA	NA	NA	1.05	1.13	0.93	1	0.59	1	1037	0.101	0.863	0.237	0.6	0.889	0.0236	0.147	-0.173	0.168	0.687
ONC0001990	Ginsenoside Rd	NA	NA	NA	NA	NA	1.55	1.15	1.05	1.15	1	1.08	1.25	0.265	1077	0.0751	0.99	1	0.904	1	-0.173	0.188	0.705
ONC0005425	ETHAMIVAN	Preclinical	respiratory stimulant				0.99	1.06	1.59	1.01	1.02	1.09	1213	0.328	1.04	0.0436	0.975	1	0.769	1	-0.173	0.229	0.74
ONC0004828	Betapar (Meprednisone)	NA	NA	NA	NA	NA	1.06	1.37	1.02	0.99	1.03	0.92	1.15	0.192	0.98	0.0557	0.911	1	0.426	0.919	-0.17	0.13	0.633
ONC0004052	ANAGRELIDE HYDROCHLORIDE	NA	NA	NA	NA	NA	0.94	1.04	1.01	0.99	0.87	0.62	0.997	0.0513	0.827	0.189	0.448	0.825	0.0054	0.0411	-0.17	0.128	0.632
ONC0004854	SB939 (Pracinostat)	NA	NA	NA	NA	NA	0.51	0.63	0.57	0.35	0.38	0.47	0.57	0.06	0.4	0.0624	1.12e-05	0.000264	3.68e-20	8.37e-19	-0.17	0.0137	0.326
ONC0004345	thonzonium bromide	NA	NA	NA	NA	NA	1.19	1.38	1.23	1.11	1.1	1.08	1267	0.1	1097	0.0153	0.993	1	0.946	1	-0.17	0.0478	0.502
ONC0003969	FELODIPINE	Launched	calcium channel blocker	CFTR	cardiology	hypertension	1.03	0.97	1.07	0.93	0.9	0.73	1023	0.0503	0.853	0.108	0.55	0.868	0.0162	0.106	-0.17	0.0474	0.5
ONC0004866	CP 673451	NA	NA	NA	NA	NA	1.11	1.34	0.98	0.98	0.99	0.95	1143	0.182	0.973	0.0208	0.9	0.998	0.386	0.893	-0.17	0.123	0.631
ONC0005054	Cathepsin Inhibitor 1	NA	NA	NA	NA	NA	1.41	1.23	0.99	1.1	0.95	1.07	1.21	0.211	1.04	0.0794	0.973	1	0.769	1	-0.17	0.148	0.656
ONC0004653	VU 0364770	NA	NA	NA	NA	NA	1.53	0.99	1.21	1.01	1.11	1.1	1243	0.272	1073	0.0551	0.988	1	0.894	1	-0.17	0.196	0.706
ONC0003817	epomediol	Launched	cholesterol inhibitor	CYP7A1	neurology/psychiatry	itching	1.22	0.99	1.31	1.02	1.04	0.95	1173	0.165	1003	0.0473	0.942	1	0.568	0.985	-0.17	0.105	0.616
ONC0005172	GDC-0623	Phase 1	MEK inhibitor				1.15	0.83	0.97	0.76	0.87	0.81	0.983	0.16	0.813	0.0551	0.398	0.792	0.00294	0.0238	-0.17	0.1	0.611
ONC0002515	VU591	Preclinical	potassium channel blocker	KCNJ1			1.32	0.98	1.21	0.95	1.08	0.97	1.17	0.173	1	0.07	0.938	1	0.548	0.978	-0.17	0.113	0.623
ONC0003385	DL-Tyrosine	NA	NA	NA	NA	NA	1.08	1.16	1.13	0.95	0.9	1.01	1123	0.0404	0.953	0.0551	0.862	0.986	0.275	0.784	-0.17	0.00755	0.283
ONC0000260	Rec-15/2615	Phase 2	adrenergic receptor antagonist	ADRA1A			0.75	1.26	1	0.88	0.89	0.73	1003	0.255	0.833	0.0896	0.473	0.837	0.00721	0.0527	-0.17	0.185	0.703
ONC0002260	Cefpiramide (sodium)	NA	NA	NA	NA	NA	1.12	1.41	0.8	0.98	1.08	0.76	1.11	0.305	0.94	0.164	0.832	0.975	0.211	0.681	-0.17	0.228	0.74
ONC0002460	PROPAFENONE HYDROCHLORIDE	NA	NA	NA	NA	NA	1.05	1.25	0.88	0.88	1.05	0.74	1.06	0.185	0.89	0.155	0.684	0.925	0.0578	0.295	-0.17	0.146	0.653
ONC0001058	Pantoprazole (sodium)	NA	NA	NA	NA	NA	1.18	1.02	1.22	0.98	0.91	1.02	1.14	0.106	0.97	0.0557	0.894	0.998	0.366	0.877	-0.17	0.0449	0.493
ONC0003476	2-Deoxyglucose	Phase 2	glycolysis inhibitor	SLC2A1|SLC2A2|SLC2A3|SLC2A4			1.03	1.13	1.09	1	0.89	0.85	1083	0.0503	0.913	0.0777	0.759	0.95	0.112	0.472	-0.17	0.0208	0.37
ONC0001518	CP-316819	Preclinical	glycogen phosphorylase inhibitor	PYGL			0.96	1.01	0.73	0.86	0.66	0.67	0.9	0.149	0.73	0.113	0.144	0.563	2.69e-05	0.000283	-0.17	0.098	0.611
ONC0005550	polyinosine	Preclinical	immunostimulant	HPRT1|IMPDH2|PYGM			1.29	0.94	0.98	1	0.79	0.91	1.07	0.192	0.9	0.105	0.717	0.938	0.0779	0.368	-0.17	0.134	0.639
ONC0000820	paclitaxel	Launched	tubulin polymerization inhibitor	BCL2|MAP2|MAP4|MAPT|NR1I2|TLR4|TUBA1A|TUBA1B|TUBA1C|TUBA3C|TUBA3D|TUBA3E|TUBA4A|TUBB|TUBB1|TUBB2A|TUBB2B|TUBB3|TUBB4A|TUBB4B|TUBB6|TUBB8	oncology	ovarian cancer|breast cancer|non-small cell lung cancer (NSCLC)	0.21	0.48	0.32	0.13	0.25	0.12	0.337	0.136	0.167	0.0723	4.37e-11	1.77e-09	2.39e-37	1.12e-35	-0.17	0.075	0.58
ONC0001784	WAY-161503	Preclinical	serotonin receptor agonist	HTR2C			1.37	1.1	1	0.95	0.98	1.03	1157	0.191	0.987	0.0404	0.921	1	0.466	0.944	-0.17	0.131	0.633
ONC0001919	SB-431542	Preclinical	TGF beta receptor inhibitor	ACVR1C|TGFBR1			0.62	0.96	1.46	0.8	0.93	0.8	1013	0.423	0.843	0.0751	0.512	0.856	0.0109	0.0753	-0.17	0.28	0.789
ONC0001008	K-Ras(G12C) inhibitor 12	NA	NA	NA	NA	NA	0.69	0.68	0.6	0.55	0.41	0.5	0.657	0.0493	0.487	0.0709	0.00033	0.00608	3.43e-15	6.31e-14	-0.17	0.0162	0.349
ONC0001909	TC-FPR-43	Preclinical	formyl peptide receptor agonist	FPR2			1.09	0.96	1.08	1.12	0.7	0.8	1043	0.0723	0.873	0.219	0.625	0.903	0.0336	0.195	-0.17	0.155	0.665
ONC0005350	BUSPIRONE HYDROCHLORIDE	NA	NA	NA	NA	NA	0.92	1.26	1.34	1.12	0.89	1	1173	0.223	1003	0.115	0.942	1	0.568	0.985	-0.17	0.163	0.68
ONC0001994	oxyfedrine	Launched	adrenergic receptor agonist		cardiology	angina pectoris	1.17	1.03	1.15	0.83	1.06	0.95	1117	0.0757	0.947	0.115	0.847	0.98	0.242	0.735	-0.17	0.055	0.532
ONC0001218	Coluracetam	NA	NA	NA	NA	NA	1.3	0.99	1.36	1.09	1.08	0.97	1217	0.199	1047	0.0666	0.977	1	0.799	1	-0.17	0.137	0.644
ONC0005346	DIMETHYL FUMARATE	NA	NA	NA	NA	NA	0.8	1.03	1.44	0.93	0.93	0.9	1.09	0.324	0.92	0.0173	0.779	0.959	0.133	0.526	-0.17	0.23	0.742
ONC0004137	Beta-Cyclodextrin	NA	NA	NA	NA	NA	1.08	0.82	1.4	0.83	1.04	0.93	1.1	0.291	0.933	0.105	0.806	0.968	0.182	0.63	-0.167	0.215	0.726
ONC0004736	MK-2866 (GTx-024)	NA	NA	NA	NA	NA	1.25	1.02	1.3	1.04	0.99	1.04	1.19	0.149	1023	0.0289	0.958	1	0.684	1	-0.167	0.0946	0.607
ONC0005203	AS-604850	Preclinical	PI3K inhibitor	PIK3CA|PIK3CG			1.04	1.05	0.93	0.74	0.83	0.95	1007	0.0666	0.84	0.105	0.486	0.843	0.00954	0.0666	-0.167	0.0468	0.497
ONC0005231	AR-42 (HDAC-42)	NA	NA	NA	NA	NA	0.28	0.39	0.47	0.12	0.24	0.28	0.38	0.0954	0.213	0.0833	6.4e-10	2.33e-08	1.83e-33	6.77e-32	-0.167	0.043	0.487
ONC0004156	KETANSERIN	Launched	serotonin receptor antagonist	ADRA1A|ADRA1B|ADRA1D|DRD1|DRD5|HTR1A|HTR1B|HTR1D|HTR2A|HTR2B|HTR2C|HTR5A|HTR7|SLC18A1|SLC18A2	cardiology	hypertension	1.03	0.99	1	0.7	0.94	0.88	1007	0.0208	0.84	0.125	0.486	0.843	0.00954	0.0666	-0.167	0.0718	0.572
ONC0004371	Encorafenib (LGX818)	NA	NA	NA	NA	NA	1.04	0.97	1.29	0.74	0.95	1.11	1.1	0.168	0.933	0.186	0.806	0.968	0.182	0.63	-0.167	0.157	0.669
ONC0003745	tolonidine	Launched	adrenergic receptor antagonist	ADRA2A			1.23	1.27	1.12	0.98	1.18	0.96	1207	0.0777	1.04	0.122	0.971	1	0.769	1	-0.167	0.0643	0.558
ONC0004142	Iodixanol	Launched	radiopaque medium		radiology	contrast agent	1.26	1.05	1.08	0.96	0.93	1	1.13	0.114	0.963	0.0351	0.876	0.99	0.329	0.839	-0.167	0.0579	0.541
ONC0003751	difenpiramide	Launched	cyclooxygenase inhibitor|prostaglandin inhibitor		neurology/psychiatry	pain relief	1.27	1.04	1.04	0.94	0.91	1	1117	0.133	0.95	0.0458	0.847	0.98	0.258	0.761	-0.167	0.0757	0.58
ONC0005032	CCT128930	Preclinical	AKT inhibitor				1.09	0.93	1.42	0.87	1.03	1.04	1147	0.25	0.98	0.0954	0.906	1	0.426	0.919	-0.167	0.186	0.703
ONC0004031	RALOXIFENE HYDROCHLORIDE	NA	NA	NA	NA	NA	0.91	0.88	1.19	0.86	0.83	0.79	0.993	0.171	0.827	0.0351	0.435	0.817	0.0054	0.0411	-0.167	0.115	0.628
ONC0004459	AMG458	Preclinical	MET inhibitor	MET			1.02	1.06	1.52	1.01	1.02	1.07	1.2	0.278	1033	0.0321	0.966	1	0.737	1	-0.167	0.204	0.711
ONC0003689	2',3'-dideoxyadenosine	NA	NA	NA	NA	NA	1.21	1	1.01	0.97	0.76	0.99	1073	0.118	0.907	0.127	0.728	0.942	0.0939	0.419	-0.167	0.0864	0.596
ONC0003378	PYRIMETHAMINE	Launched	dihydrofolate reductase inhibitor	DHFR|SLC47A1	infectious disease	malaria	1.05	1.17	0.89	0.97	0.65	0.99	1037	0.14	0.87	0.191	0.6	0.889	0.0299	0.177	-0.167	0.148	0.655
ONC0003426	CBS, N-Cyclohexyl-2-benzothiazolesulfenamide	NA	NA	NA	NA	NA	0.9	1.3	1.04	0.76	0.99	0.99	1.08	0.203	0.913	0.133	0.749	0.947	0.112	0.472	-0.167	0.155	0.664
ONC0002892	NA	NA	NA	NA	NA	NA	0.89	0.89	0.98	0.87	0.74	0.65	0.92	0.052	0.753	0.111	0.192	0.64	0.000117	0.00115	-0.167	0.052	0.521
ONC0002677	BMS-566419	Preclinical	inosine monophosphate dehydrogenase inhibitor	IMPDH1|IMPDH2			0.68	1.04	0.84	0.7	0.67	0.69	0.853	0.18	0.687	0.0153	0.0654	0.374	1.26e-06	1.48e-05	-0.167	0.125	0.632
ONC0002577	AR-12	Phase 1	phosphoinositide dependent kinase inhibitor	PDPK1			0.96	0.97	1.22	0.73	0.94	0.98	1.05	0.147	0.883	0.134	0.649	0.915	0.0468	0.252	-0.167	0.111	0.622
ONC0001073	Kuromanin (chloride)	NA	NA	NA	NA	NA	1.16	1.14	1.09	0.88	1	1.01	1.13	0.0361	0.963	0.0723	0.876	0.99	0.329	0.839	-0.167	0.0194	0.37
ONC0001326	ABT-702	Preclinical	adenosine kinase inhibitor	ADK			0.85	1.35	1.13	0.92	1	0.91	1.11	0.251	0.943	0.0493	0.832	0.975	0.226	0.711	-0.167	0.184	0.703
ONC0000373	METHYLPREDNISOLONE	Launched	glucocorticoid receptor agonist	NR3C1	endocrinology|rheumatology|dermatology|infectious disease|allergy|hematology|neurology/psychiatry|gastroenterology	hypercalcemia|thyroiditis|ankylosing spondylitis|bursitis|osteoarthritis|psoriatic arthritis|seborrheic dermatitis|mycosis|allergic rhinitis|psoriasis|anemia|multiple sclerosis|ulcerative colitis|enteritis	1.05	1.04	1.15	0.87	0.96	0.91	1.08	0.0608	0.913	0.0451	0.749	0.947	0.112	0.472	-0.167	0.011	0.309
ONC0003510	oxatomide	Launched	histamine receptor antagonist	HRH1	allergy	allergic rhinitis	1.16	1.04	1.17	1	1.03	0.84	1123	0.0723	0.957	0.102	0.862	0.986	0.292	0.806	-0.167	0.0448	0.493
ONC0001635	ONO-4817	Phase 1	matrix metalloprotease inhibitor	MMP8			1.11	1.28	0.99	0.9	0.88	1.1	1127	0.146	0.96	0.122	0.869	0.988	0.31	0.826	-0.167	0.103	0.614
ONC0000103	TTNPB	Phase 1	retinoid receptor agonist	RARA|RARB|RARG			1.24	1.03	1.21	1.1	0.86	1.02	1.16	0.114	0.993	0.122	0.925	1	0.507	0.957	-0.167	0.0795	0.583
ONC0001414	SR-2640	Phase 2	leukotriene receptor antagonist	CYSLTR1			1.22	1.21	0.89	0.97	0.83	1.02	1107	0.188	0.94	0.0985	0.823	0.974	0.211	0.681	-0.167	0.133	0.637
ONC0001540	NAN-190	Preclinical	serotonin receptor agonist	ADRA1A|ADRA1B|ADRA1D|HTR1A|HTR1F			0.96	1.27	0.99	0.87	0.84	1.01	1073	0.171	0.907	0.0907	0.728	0.942	0.0939	0.419	-0.167	0.116	0.629
ONC0005589	KN-93	Preclinical	calcium/calmodulin dependent protein kinase inhibitor	CAMK2A			0.96	0.88	1.13	0.82	0.85	0.8	0.99	0.128	0.823	0.0252	0.423	0.811	0.00465	0.0361	-0.167	0.0738	0.58
ONC0005497	flucloxacillin	Launched	bacterial cell wall synthesis inhibitor		infectious disease|otolaryngology|dermatology|gastroenterology	gram-positive bacterial infections|tonsillitis|sinusitis|pneumonia|eczema|endocarditis|meningitis|enteritis|bacterial septicemia	1.25	1.15	1.06	1.03	0.93	1	1153	0.095	0.987	0.0513	0.916	1	0.466	0.944	-0.167	0.0368	0.455
ONC0000030	edaglitazone	Phase 2	PPAR receptor agonist	PPARG			0.95	1.06	1.21	0.98	0.75	0.99	1073	0.131	0.907	0.136	0.728	0.942	0.0939	0.419	-0.167	0.1	0.611
ONC0000044	L-670596	Preclinical	prostanoid receptor antagonist				0.99	1.56	1.32	1.17	1.1	1.1	1.29	0.286	1123	0.0404	0.996	1	0.978	1	-0.167	0.21	0.721
ONC0001959	U-62066 mesylate	NA	NA	NA	NA	NA	1.17	1	1.23	0.96	0.99	0.95	1133	0.119	0.967	0.0208	0.882	0.993	0.347	0.857	-0.167	0.0664	0.563
ONC0005294	CLOMIPRAMINE HYDROCHLORIDE	NA	NA	NA	NA	NA	1.02	1.2	0.99	0.62	1.11	0.98	1.07	0.114	0.903	0.254	0.717	0.938	0.0856	0.393	-0.167	0.191	0.705
ONC0001960	(±)-Methoxyverapamil hydrochloride	NA	NA	NA	NA	NA	0.98	1.05	1.07	0.78	1.02	0.8	1033	0.0473	0.867	0.133	0.588	0.885	0.0266	0.161	-0.167	0.0759	0.581
ONC0005410	cimetropium	Launched	acetylcholine receptor antagonist	CHRM1	gastroenterology	irritable bowel syndrome	0.97	1.16	1.29	0.86	1.07	0.99	1.14	0.161	0.973	0.106	0.894	0.998	0.386	0.893	-0.167	0.11	0.622
ONC0001184	Adrafinil	Launched	adrenergic receptor agonist		neurology/psychiatry	fatigue	1.22	0.96	1.14	1.01	0.96	0.85	1107	0.133	0.94	0.0819	0.823	0.974	0.211	0.681	-0.167	0.0765	0.582
ONC0002958	enflurane	Launched	membrane permeability inhibitor	GABRA1|GABRA2|GABRA3|GABRA4|GABRA5|GABRA6|GABRB1|GABRB2|GABRB3|GABRD|GABRE|GABRG1|GABRG2|GABRG3|GABRP|GABRQ|GLRA1|GLRB|KCNK10|KCNK18|KCNK2|KCNK3|KCNK9	neurology/psychiatry	anesthetic	1	1.13	1.49	1.1	0.99	1.03	1207	0.254	1.04	0.0557	0.971	1	0.769	1	-0.167	0.187	0.705
ONC0004760	Isepamicin sulphate	NA	NA	NA	NA	NA	1.01	1.03	1.33	1.07	0.91	0.9	1123	0.179	0.96	0.0954	0.862	0.986	0.31	0.826	-0.163	0.128	0.632
ONC0004794	Sodium ascorbate	NA	NA	NA	NA	NA	0.98	1.31	1.12	1.07	0.98	0.87	1137	0.166	0.973	0.1	0.888	0.995	0.386	0.893	-0.163	0.116	0.63
ONC0004394	Geldanamycin	Preclinical	HSP inhibitor	HSP90AA1			1.39	1.53	0.66	1.06	1.08	0.95	1193	0.467	1.03	0.07	0.961	1	0.72	1	-0.163	0.304	0.817
ONC0003988	DECAMETHONIUM BROMIDE	NA	NA	NA	NA	NA	0.98	1.41	0.96	0.93	0.97	0.96	1117	0.254	0.953	0.0208	0.847	0.98	0.275	0.784	-0.163	0.191	0.705
ONC0003901	TRANILAST	Launched	angiogenesis inhibitor	HPGDS|HRH1	pulmonary	asthma	1.14	0.91	1.17	1.01	0.89	0.83	1073	0.142	0.91	0.0917	0.728	0.942	0.103	0.446	-0.163	0.091	0.606
ONC0002492	TC-H-106	Preclinical	HDAC inhibitor	HDAC1|HDAC2|HDAC3|HDAC8			0.87	1.17	0.95	0.7	0.91	0.89	0.997	0.155	0.833	0.116	0.448	0.825	0.00721	0.0527	-0.163	0.112	0.622
ONC0003908	TRIFLURIDINE	Launched	DNA directed DNA polymerase inhibitor|thymidylate synthase inhibitor	TYMS	infectious disease	virus herpes simplex (HSV)	0.93	0.98	0.98	0.84	0.75	0.81	0.963	0.0289	0.8	0.0458	0.326	0.763	0.00154	0.0131	-0.163	0.00507	0.25
ONC0003931	SM-164	Preclinical	XIAP inhibitor	BIRC2|BIRC3|XIAP			0.82	0.98	0.96	0.71	0.66	0.9	0.92	0.0872	0.757	0.127	0.192	0.64	0.000143	0.0014	-0.163	0.0743	0.58
ONC0003016	1,3-dipropyl-8-phenylxanthine	Preclinical	adenosine receptor antagonist				0.95	0.98	0.98	0.77	0.85	0.8	0.97	0.0173	0.807	0.0404	0.349	0.774	0.00214	0.0177	-0.163	0.00514	0.252
ONC0000235	CHC	Preclinical	monocarboxylate transporter inhibitor	SLC16A1			1.1	0.99	1.23	0.96	0.94	0.93	1107	0.12	0.943	0.0153	0.823	0.974	0.226	0.711	-0.163	0.0703	0.567
ONC0002232	KN-62	Preclinical	calcium/calmodulin dependent protein kinase inhibitor|purinergic receptor antagonist	AKT1|CAMK2A|CHEK1|LCK|MAPK1|MAPK11|MAPK12|MAPK14|MAPK8|P2RX7|PRKCA|ROCK1|RPS6KB1|SGK1			1	1.28	0.97	0.93	0.93	0.9	1083	0.171	0.92	0.0173	0.759	0.95	0.133	0.526	-0.163	0.119	0.63
ONC0002462	NIMODIPINE	Launched	calcium channel blocker	CFTR|NR3C2	hematology	hemorrhage	1.01	1.23	1.22	1.01	0.98	0.98	1153	0.124	0.99	0.0173	0.916	1	0.487	0.945	-0.163	0.074	0.58
ONC0003481	PKC-412 (Midostaurin)	NA	NA	NA	NA	NA	0.64	0.63	0.53	0.34	0.49	0.48	0.6	0.0608	0.437	0.0839	3.89e-05	0.00083	5.78e-18	1.18e-16	-0.163	0.029	0.412
ONC0001235	Retigabine	NA	NA	NA	NA	NA	1.29	1.01	1.15	1.02	0.89	1.05	1.15	0.14	0.987	0.085	0.911	1	0.466	0.944	-0.163	0.0871	0.597
ONC0001503	BU226	Preclinical	imidazoline receptor ligand				1.06	1.36	1.13	1.02	0.97	1.07	1183	0.157	1.02	0.05	0.952	1	0.666	1	-0.163	0.103	0.614
ONC0005600	cefamandole	Launched	bacterial cell wall synthesis inhibitor		infectious disease	skin infections|urinary tract infections|respiratory tract infections	0.99	1.06	0.98	0.99	0.57	0.98	1.01	0.0436	0.847	0.24	0.499	0.851	0.0125	0.0846	-0.163	0.179	0.695
ONC0005470	Cerulenin	Launched	fatty acid synthase inhibitor	FASN	infectious disease	fungal infection	1.33	1.21	0.89	0.95	0.95	1.04	1143	0.227	0.98	0.052	0.9	0.998	0.426	0.919	-0.163	0.17	0.687
ONC0002755	Budipine	Launched	glutamate receptor antagonist	GRIN1	neurology/psychiatry	Parkinson's Disease	0.98	1.42	0.97	0.86	0.99	1.03	1123	0.257	0.96	0.0889	0.862	0.986	0.31	0.826	-0.163	0.195	0.706
ONC0003163	ADIPHENINE HYDROCHLORIDE	NA	NA	NA	NA	NA	1.12	1.25	1.01	1.07	0.96	0.86	1127	0.12	0.963	0.105	0.869	0.988	0.329	0.839	-0.163	0.0761	0.582
ONC0000442	DIFLUNISAL	Launched	prostanoid receptor antagonist	PTGS1|PTGS2	rheumatology	rheumatoid arthritis|osteoarthritis	1.39	1.21	1.23	1.13	1.21	1	1277	0.0987	1113	0.106	0.995	1	0.969	1	-0.163	0.0614	0.549
ONC0000595	TAMOXIFEN CITRATE	NA	NA	NA	NA	NA	0.94	1.18	1.01	1	0.83	0.81	1043	0.123	0.88	0.104	0.625	0.903	0.042	0.232	-0.163	0.0785	0.582
ONC0000977	Molidustat	Phase 3	hypoxia inducible factor inhibitor	EGLN2			1.03	0.92	1.15	0.97	0.71	0.93	1033	0.115	0.87	0.14	0.588	0.885	0.0299	0.177	-0.163	0.0981	0.611
ONC0000886	Tofogliflozin (hydrate)	NA	NA	NA	NA	NA	1.06	1.24	1.13	0.95	0.9	1.09	1143	0.0907	0.98	0.0985	0.9	0.998	0.426	0.919	-0.163	0.0513	0.517
ONC0005337	EDROPHONIUM CHLORIDE	NA	NA	NA	NA	NA	0.96	1.5	1.15	0.98	1.06	1.08	1203	0.274	1.04	0.0529	0.969	1	0.769	1	-0.163	0.205	0.713
ONC0005284	PENTYLENETETRAZOL	Withdrawn	GABA receptor antagonist				0.96	1.42	0.99	1	0.89	0.99	1123	0.257	0.96	0.0608	0.862	0.986	0.31	0.826	-0.163	0.193	0.706
ONC0005377	eniluracil	Phase 3	dihydropyrimidine dehydrogenase inhibitor	AOX1|DPYD|XDH			1.09	0.94	1.5	1.1	0.94	1	1177	0.29	1013	0.0808	0.946	1	0.628	1	-0.163	0.217	0.727
ONC0002966	deptropine	Preclinical	histamine receptor antagonist	HRH1			0.85	1.1	1.24	0.83	0.9	0.97	1063	0.198	0.9	0.07	0.695	0.93	0.0779	0.368	-0.163	0.143	0.652
ONC0002115	begacestat	Phase 1	gamma secretase inhibitor	PSEN1			1.03	1.26	1.02	0.9	0.96	0.97	1103	0.136	0.943	0.0379	0.815	0.972	0.226	0.711	-0.16	0.0854	0.594
ONC0002141	putrescine	Phase 2	tissue transglutaminase inhibitor	AMD1|KCNJ4|ODC1			1.27	0.79	1.44	0.88	1.05	1.09	1167	0.337	1007	0.112	0.934	1	0.588	0.993	-0.16	0.252	0.76
ONC0004802	L-Arginine HCl	NA	NA	NA	NA	NA	0.86	1.22	1.3	1.02	0.97	0.91	1127	0.234	0.967	0.0551	0.869	0.988	0.347	0.857	-0.16	0.179	0.695
ONC0003549	vesamicol	Preclinical	acetylcholinesterase inhibitor	SLC18A3			1.09	1.12	1.1	0.93	0.94	0.96	1103	0.0153	0.943	0.0153	0.815	0.972	0.226	0.711	-0.16	0.000106	0.0897
ONC0003587	TC1	Preclinical	beta-secretase inhibitor	BACE1			1.01	1.09	1.15	0.99	0.89	0.89	1083	0.0702	0.923	0.0577	0.759	0.95	0.145	0.552	-0.16	0.02	0.37
ONC0004398	GZD824 Dimesylate	NA	NA	NA	NA	NA	0.93	1	0.86	0.74	0.79	0.78	0.93	0.07	0.77	0.0265	0.22	0.682	0.00031	0.0029	-0.16	0.0223	0.379
ONC0004912	Imidapril HCl	NA	NA	NA	NA	NA	1.17	1.28	1.03	1.01	1.03	0.96	1.16	0.125	1	0.0361	0.925	1	0.548	0.978	-0.16	0.0746	0.58
ONC0004019	CARBADOX	Launched	other antibiotic		infectious disease|gastroenterology	dysentry|enteritis	1.18	0.93	0.87	0.92	0.63	0.95	0.993	0.164	0.833	0.177	0.435	0.817	0.00721	0.0527	-0.16	0.158	0.669
ONC0004978	Ixazomib (MLN2238)	NA	NA	NA	NA	NA	0.25	0.2	0.12	0.02	0.07	0	0.19	0.0656	0.03	0.0361	1.4e-15	1.01e-13	5.29e-50	6.92e-48	-0.16	0.0161	0.349
ONC0005059	ODM-201	NA	NA	NA	NA	NA	1.27	1.12	1.1	0.99	0.99	1.03	1163	0.0929	1003	0.0231	0.93	1	0.568	0.985	-0.16	0.0443	0.493
ONC0005133	P22077	Preclinical	ubiquitin specific protease inhibitor	USP7			1.22	0.99	1.32	1.01	1.04	1	1177	0.169	1017	0.0208	0.946	1	0.647	1	-0.16	0.121	0.63
ONC0003850	gamma-linolenic-acid	Phase 2	cyclooxygenase inhibitor|prostanoid receptor agonist	PTGS1|PTGS2			1.01	1.32	1.31	1	1.15	1.01	1213	0.176	1053	0.0839	0.975	1	0.827	1	-0.16	0.127	0.632
ONC0003950	EPZ011989	Preclinical	histone lysine methyltransferase inhibitor	EZH2			1.25	0.9	1.44	0.9	1.12	1.09	1197	0.274	1037	0.119	0.964	1	0.754	1	-0.16	0.214	0.725
ONC0002533	DY131	Preclinical	estrogen-related receptor agonist	ESRRB|ESRRG			0.96	0.99	1.07	0.85	0.81	0.88	1007	0.0569	0.847	0.0351	0.486	0.843	0.0125	0.0846	-0.16	0.0104	0.298
ONC0000653	FAMPRIDINE	NA	NA	NA	NA	NA	0.99	1.13	1.21	1.03	0.87	0.95	1.11	0.111	0.95	0.08	0.832	0.975	0.258	0.761	-0.16	0.0602	0.545
ONC0000631	SULOCTIDIL	Withdrawn	adrenergic receptor antagonist				1.02	1.08	1.61	1.05	1.22	0.96	1237	0.325	1077	0.132	0.985	1	0.904	1	-0.16	0.247	0.759
ONC0002248	LDN193189 (Hydrochloride)	NA	NA	NA	NA	NA	1.09	1.02	1.1	1	0.74	0.99	1.07	0.0436	0.91	0.147	0.717	0.938	0.103	0.446	-0.16	0.097	0.611
ONC0001400	m-3M3FBS	Preclinical	phospholipase activator	PLCB2|PLCB3|PLCD1|PLCG1|PLCG2			1.05	1.77	0.68	1	1.02	1	1167	0.554	1007	0.0115	0.934	1	0.588	0.993	-0.16	0.333	0.839
ONC0000430	Geranyl-farnesylacetate, __ Gefarnate	NA	NA	NA	NA	NA	1.12	1	1.31	1.1	1.05	0.8	1143	0.156	0.983	0.161	0.9	0.998	0.446	0.932	-0.16	0.142	0.652
ONC0003443	Licochalcone A	NA	NA	NA	NA	NA	0.97	0.61	0.86	0.53	0.76	0.67	0.813	0.184	0.653	0.116	0.0289	0.227	8.97e-08	1.15e-06	-0.16	0.142	0.652
ONC0001671	allopregnanolone	NA	NA	NA	NA	NA	0.95	1.14	1.11	0.9	0.79	1.03	1067	0.102	0.907	0.12	0.707	0.935	0.0939	0.419	-0.16	0.0778	0.582
ONC0000287	hesperadin	Preclinical	Aurora kinase inhibitor	AURKB			0.5	0.43	0.55	0.25	0.46	0.29	0.493	0.0603	0.333	0.112	3.21e-07	8.64e-06	1.67e-24	4.24e-23	-0.16	0.0572	0.538
ONC0000312	Ufenamate	Launched	cyclooxygenase inhibitor	PTGS1|PTGS2	dermatology	eczema|dermatitis	0.97	0.91	1.09	0.92	0.71	0.86	0.99	0.0917	0.83	0.108	0.423	0.811	0.00624	0.0466	-0.16	0.0621	0.55
ONC0002313	sertindole	Withdrawn	dopamine receptor antagonist|serotonin receptor antagonist	ADRA1A|ADRA1B|ADRA1D|DRD2|DRD3|DRD4|HRH1|HTR1A|HTR1B|HTR1D|HTR1E|HTR1F|HTR2A|HTR2C|HTR6|KCNH2			1	1.22	0.95	0.93	0.72	1.04	1057	0.144	0.897	0.163	0.673	0.923	0.0706	0.343	-0.16	0.136	0.642
ONC0001257	Relebactam	Launched	beta lactamase inhibitor				1.07	1.14	1.2	0.91	1.03	0.99	1137	0.0651	0.977	0.0611	0.888	0.995	0.406	0.902	-0.16	0.0181	0.361
ONC0002319	nifenalol	Launched	adrenergic receptor antagonist	ADRB1|ADRB2			1.23	1.19	0.96	0.88	0.98	1.04	1127	0.146	0.967	0.0808	0.869	0.988	0.347	0.857	-0.16	0.0956	0.61
ONC0000157	ITE	Preclinical	aryl hydrocarbon receptor agonist	AHR			1.01	1.54	0.75	1.01	0.93	0.88	1.1	0.403	0.94	0.0656	0.806	0.968	0.211	0.681	-0.16	0.282	0.792
ONC0002359	pivampicillin	Launched	bacterial cell wall synthesis inhibitor		pulmonary|infectious disease	bronchitis|pneumonia|gynecologic infections	1.02	1.26	1.11	0.92	1.03	0.96	1.13	0.121	0.97	0.0557	0.876	0.99	0.366	0.877	-0.16	0.0678	0.565
ONC0002350	trapidil	Launched	PDGFR tyrosine kinase receptor inhibitor	PDGFRA	cardiology	coronary artery disease (CAD)	1.18	1	1.39	0.8	1.27	1.02	1.19	0.195	1.03	0.235	0.958	1	0.72	1	-0.16	0.209	0.719
ONC0001577	homoharringtonine	Launched	protein synthesis inhibitor	RPL3	hematologic malignancy	chronic myeloid leukemia (CML)	-0.14	-0.02	0.34	-0.01	-0.17	-0.12	0.06	0.25	-0.1	0.0819	2.8e-20	4.15e-18	8.06e-64	7.57e-61	-0.16	0.193	0.706
ONC0000971	Valrubicin	Launched	DNA inhibitor|topoisomerase inhibitor	TOP2A	oncology	bladder cancer	0.31	0.44	0.39	0.21	0.29	0.16	0.38	0.0656	0.22	0.0656	6.4e-10	2.33e-08	6.28e-33	2.25e-31	-0.16	0.0202	0.37
ONC0001169	(-)-Epicatechin gallate	NA	NA	NA	NA	NA	1.01	1	1.05	0.73	0.85	1	1.02	0.0265	0.86	0.135	0.537	0.863	0.0209	0.132	-0.16	0.0865	0.596
ONC0005372	MOROXYDINE HYDROCHLORIDE	NA	NA	NA	NA	NA	1.02	1.15	1.16	0.98	0.89	0.98	1.11	0.0781	0.95	0.052	0.832	0.975	0.258	0.761	-0.16	0.0249	0.395
ONC0002919	alfadolone-acetate	Phase 2	benzodiazepine receptor agonist				1.44	1.08	0.91	0.96	1.06	0.93	1143	0.271	0.983	0.0681	0.9	0.998	0.446	0.932	-0.16	0.208	0.718
ONC0005261	LY2584702 tosylate	NA	NA	NA	NA	NA	0.93	0.85	0.99	0.69	0.99	0.62	0.923	0.0702	0.767	0.197	0.201	0.653	0.000257	0.00241	-0.157	0.15	0.661
ONC0003551	TC-E-5002	Preclinical	histone demethylase inhibitor	KDM2A|KDM4A|KDM4C|KDM5A|KDM6A|KDM7A|PHF8			1.08	0.83	1.39	0.69	1.15	0.99	1.1	0.281	0.943	0.234	0.806	0.968	0.226	0.711	-0.157	0.25	0.76
ONC0003723	metirosine	Launched	tyrosine hydroxylase inhibitor	TH	cardiology	hypertension	1.12	1.32	1.05	1	1.05	0.97	1163	0.14	1007	0.0404	0.93	1	0.588	0.993	-0.157	0.0928	0.606
ONC0003736	tromaril	Launched	prostanoid receptor antagonist		ophthalmology	eye inflammation	1.37	1.31	1.02	1.09	1.12	1.02	1233	0.187	1077	0.0513	0.984	1	0.904	1	-0.157	0.141	0.652
ONC0004024	DIPERODON HYDROCHLORIDE	NA	NA	NA	NA	NA	0.97	1.49	0.88	1	0.94	0.93	1113	0.329	0.957	0.0379	0.84	0.979	0.292	0.806	-0.157	0.249	0.76
ONC0004947	Baicalin	Launched	beta glucuronidase inhibitor	PREP	neurology/psychiatry	anxiety	1.03	1.35	0.97	1.02	0.98	0.88	1117	0.204	0.96	0.0721	0.847	0.98	0.31	0.826	-0.157	0.158	0.669
ONC0004620	PluriSIn #1 (NSC 14613)	NA	NA	NA	NA	NA	1.28	1.02	0.94	1.09	0.83	0.85	1.08	0.178	0.923	0.145	0.749	0.947	0.145	0.552	-0.157	0.152	0.664
ONC0004979	Indirubin	Phase 2/Phase 3	CDK inhibitor|glycogen synthase kinase inhibitor	CDK1|CDK5|GSK3A			1.25	1.01	1.25	0.96	1.07	1.01	1.17	0.139	1013	0.0551	0.938	1	0.628	1	-0.157	0.0898	0.603
ONC0003857	beta-elemene	Launched	apoptosis stimulant	MMP2|MMP9			0.99	1.26	0.99	0.96	0.8	1.01	1.08	0.156	0.923	0.11	0.749	0.947	0.145	0.552	-0.157	0.118	0.63
ONC0005191	KPT-185	Preclinical	exportin antagonist	XPO1			0.24	0.28	0.39	0.1	0.23	0.11	0.303	0.0777	0.147	0.0723	4.94e-12	2.32e-10	4.43e-39	2.42e-37	-0.157	0.0316	0.422
ONC0004295	BENAZEPRIL HYDROCHLORIDE	NA	NA	NA	NA	NA	1.35	1.21	0.93	1.18	0.98	0.86	1163	0.214	1007	0.162	0.93	1	0.588	0.993	-0.157	0.186	0.705
ONC0003042	LSN-2463359	Preclinical	glutamate receptor positive allosteric modulator	GRM5			1.11	0.8	1.13	0.77	0.83	0.97	1013	0.185	0.857	0.103	0.512	0.856	0.0184	0.118	-0.157	0.143	0.652
ONC0000662	MEBEVERINE HYDROCHLORIDE	NA	NA	NA	NA	NA	0.77	1.41	1.51	0.99	1.16	1.07	1.23	0.401	1073	0.085	0.983	1	0.894	1	-0.157	0.286	0.798
ONC0003360	Tetramethylthiuram monosulfide	NA	NA	NA	NA	NA	1.2	0.86	0.62	0.78	0.69	0.74	0.893	0.291	0.737	0.0451	0.13	0.532	4.15e-05	0.00043	-0.157	0.225	0.736
ONC0002269	Micafungin (sodium)	NA	NA	NA	NA	NA	1.59	0.75	1.24	1.05	1.04	1.02	1193	0.422	1037	0.0153	0.961	1	0.754	1	-0.157	0.293	0.805
ONC0002229	SAR405	Preclinical	PI3K inhibitor	PIK3C3			0.95	0.76	1.31	0.78	0.92	0.85	1007	0.279	0.85	0.07	0.486	0.843	0.0143	0.0945	-0.157	0.218	0.727
ONC0003437	LY 171883	NA	NA	NA	NA	NA	1.21	1.2	1.04	0.87	1.04	1.07	1.15	0.0954	0.993	0.108	0.911	1	0.507	0.957	-0.157	0.0668	0.564
ONC0001451	DNQX	Preclinical	glutamate receptor antagonist	GRIA1|GRIA2|GRIK1|GRIN1|GRIN2A|GRIN2B			1.09	1.2	0.96	1.01	1	0.77	1083	0.12	0.927	0.136	0.759	0.95	0.157	0.579	-0.157	0.105	0.616
ONC0003208	levomequitazine	Phase 2	histamine receptor antagonist	HRH1			0.95	0.84	1.14	0.64	0.88	0.94	0.977	0.152	0.82	0.159	0.373	0.785	0.004	0.0316	-0.157	0.142	0.652
ONC0000449	PENICILLIN V POTASSIUM	NA	NA	NA	NA	NA	0.98	0.95	0.99	0.56	1.16	0.73	0.973	0.0208	0.817	0.309	0.361	0.778	0.00343	0.0276	-0.157	0.236	0.747
ONC0003133	URETHANE	Preclinical	local anesthetic				0.91	1.35	0.99	0.84	0.94	1	1083	0.234	0.927	0.0808	0.759	0.95	0.157	0.579	-0.157	0.184	0.703
ONC0003144	METHYLBENZETHONIUM CHLORIDE	NA	NA	NA	NA	NA	1.51	1.08	1.06	1.08	0.99	1.11	1217	0.254	1.06	0.0624	0.977	1	0.852	1	-0.157	0.199	0.71
ONC0001677	BMS-470539	Preclinical	melanocortin receptor agonist	MC1R			1.15	1.02	1.47	1.07	1	1.1	1213	0.232	1057	0.0513	0.975	1	0.84	1	-0.157	0.181	0.699
ONC0005369	AFALANINE	Phase 3	dopamine receptor agonist	DRD2			1	1.19	1.21	0.98	0.91	1.04	1133	0.116	0.977	0.0651	0.882	0.993	0.406	0.902	-0.157	0.0648	0.56
ONC0005371	MOLINDONE HYDROCHLORIDE	NA	NA	NA	NA	NA	1.12	1.17	1.29	0.89	1.11	1.11	1193	0.0874	1037	0.127	0.961	1	0.754	1	-0.157	0.0811	0.584
ONC0005342	phenacaine	Launched	local anesthetic		neurology/psychiatry	local anesthetic	0.99	1.15	0.99	0.83	0.88	0.95	1043	0.0924	0.887	0.0603	0.625	0.903	0.0521	0.274	-0.157	0.04	0.471
ONC0005277	Vistusertib (AZD2014)	NA	NA	NA	NA	NA	0.74	0.74	0.41	0.45	0.65	0.33	0.63	0.191	0.477	0.162	0.000125	0.0025	1e-15	1.88e-14	-0.153	0.175	0.689
ONC0003737	cis-urocanic-acid	Phase 2	serotonin receptor agonist	HTR2A			1	1.28	1.32	1.1	0.98	1.06	1.2	0.174	1047	0.0611	0.966	1	0.799	1	-0.153	0.132	0.635
ONC0004185	LOMUSTINE	Launched	DNA synthesis inhibitor		hematologic malignancy|oncology	Hodgkin's lymphoma|brain tumors	0.99	1.24	1.01	1.08	0.8	0.9	1.08	0.139	0.927	0.142	0.749	0.947	0.157	0.579	-0.153	0.126	0.632
ONC0005085	Chrysin	Phase 1	breast cancer resistance protein inhibitor	AKR1B1|CDK6|CYP19A1|CYP1B1			1.05	1.01	1	0.95	0.88	0.77	1.02	0.0265	0.867	0.0907	0.537	0.863	0.0266	0.161	-0.153	0.0448	0.493
ONC0004867	VX-809 (Lumacaftor)	NA	NA	NA	NA	NA	1.32	1.06	0.9	1.03	0.78	1.01	1093	0.212	0.94	0.139	0.788	0.963	0.211	0.681	-0.153	0.181	0.699
ONC0003980	DORAMECTIN	Launched			infectious disease	gastrointestinal roundworms	1.15	1.14	0.91	0.82	0.98	0.94	1067	0.136	0.913	0.0833	0.707	0.935	0.112	0.472	-0.153	0.0926	0.606
ONC0004884	Raltitrexed (Tomudex)	NA	NA	NA	NA	NA	0.8	1.03	0.84	0.69	0.76	0.76	0.89	0.123	0.737	0.0404	0.123	0.519	4.15e-05	0.00043	-0.153	0.0768	0.582
ONC0004593	BMS 777607	NA	NA	NA	NA	NA	1.33	1.25	1.34	1.06	1.22	1.18	1307	0.0493	1153	0.0833	0.998	1	0.993	1	-0.153	0.0325	0.427
ONC0005158	RVX-208(RVX-000222)	NA	NA	NA	NA	NA	1.05	1.13	1	0.95	0.87	0.9	1.06	0.0656	0.907	0.0404	0.684	0.925	0.0939	0.419	-0.153	0.0175	0.353
ONC0003843	seclazone	Phase 1	anti-inflammatory agent				1.15	1.21	1.02	0.79	1.08	1.05	1127	0.0971	0.973	0.159	0.869	0.988	0.386	0.893	-0.153	0.121	0.63
ONC0004302	CANDESARTAN CILEXTIL	NA	NA	NA	NA	NA	1.16	0.77	1.12	0.75	0.95	0.89	1017	0.215	0.863	0.103	0.525	0.861	0.0236	0.147	-0.153	0.174	0.689
ONC0003915	CLOSANTEL	Launched	chitinase inhibitor|NFkB pathway inhibitor		infectious disease	liver flukes	0.94	0.93	1.27	0.6	0.93	1.15	1047	0.193	0.893	0.277	0.637	0.909	0.064	0.318	-0.153	0.24	0.749
ONC0003355	apraclonidine	Launched	adrenergic receptor agonist	ADRA1A|ADRA2A|ADRA2B|ADRA2C	ophthalmology	glaucoma|intraocular pressure	1.11	1.1	1.15	0.9	1.02	0.98	1.12	0.0265	0.967	0.0611	0.855	0.984	0.347	0.857	-0.153	0.0168	0.353
ONC0000261	BAG-956	Preclinical	phosphoinositide dependent kinase inhibitor	PIK3CG			0.51	0.47	0.33	0.43	0.22	0.2	0.437	0.0945	0.283	0.127	1.66e-08	5.07e-07	4.66e-28	1.33e-26	-0.153	0.0877	0.597
ONC0002404	AZILSARTAN MEDOXOMIL	NA	NA	NA	NA	NA	1.04	1.23	1.26	1	1.07	1	1177	0.119	1023	0.0404	0.946	1	0.684	1	-0.153	0.0728	0.575
ONC0000372	INDAPAMIDE	Launched	thiazide diuretic	CA2|HTR3A|KCNQ1	cardiology	hypertension|congestive heart failure	0.99	1.35	1.15	0.95	1.1	0.98	1163	0.18	1.01	0.0794	0.93	1	0.608	0.997	-0.153	0.139	0.649
ONC0000375	Delamanid	Launched	bacterial cell wall synthesis inhibitor		infectious disease	tuberculosis	1.08	0.98	1.19	0.86	0.95	0.98	1083	0.105	0.93	0.0624	0.759	0.95	0.169	0.607	-0.153	0.0555	0.532
ONC0002321	TULOBUTEROL HYDROCHLORIDE	NA	NA	NA	NA	NA	0.97	1.01	1.05	0.67	1.06	0.84	1.01	0.04	0.857	0.196	0.499	0.851	0.0184	0.118	-0.153	0.153	0.664
ONC0001304	Flupirtine (Maleate)	NA	NA	NA	NA	NA	1.24	1.14	0.95	0.96	1.11	0.8	1.11	0.147	0.957	0.155	0.832	0.975	0.292	0.806	-0.153	0.141	0.652
ONC0003153	trap-101	Preclinical	nociceptin/orphanin FQ receptor antagonist|opioid receptor antagonist	OPRL1			1.23	0.73	1.38	1	0.93	0.95	1113	0.34	0.96	0.0361	0.84	0.979	0.31	0.826	-0.153	0.259	0.767
ONC0002054	UNC0321	Preclinical	histone lysine methyltransferase inhibitor	EHMT2			1.1	0.89	1.17	1	1.08	0.62	1053	0.146	0.9	0.246	0.661	0.916	0.0779	0.368	-0.153	0.208	0.718
ONC0000011	ETP-45658	Preclinical	PI3K inhibitor	PIK3CA|PIK3CB|PIK3CD|PIK3CG			0.86	0.96	0.89	0.76	0.62	0.87	0.903	0.0513	0.75	0.125	0.152	0.577	9.56e-05	0.000951	-0.153	0.0783	0.582
ONC0000029	BIIB021	Phase 2	HSP inhibitor	HSP90AA1			0.1	0.31	0.18	0.13	-0.01	0.01	0.197	0.106	0.043	0.0757	2.34e-15	1.64e-13	1.1e-48	1.27e-46	-0.153	0.0592	0.541
ONC0002078	Tanzisertib	NA	NA	NA	NA	NA	1.45	1.13	0.98	1.09	1.02	0.99	1187	0.24	1033	0.0513	0.955	1	0.737	1	-0.153	0.192	0.706
ONC0003287	Arotinolol	Launched	adrenergic receptor antagonist	ADRB3	cardiology|neurology/psychiatry	hypertension|tremors	0.92	1.06	0.97	0.83	0.75	0.91	0.983	0.0709	0.83	0.08	0.398	0.792	0.00624	0.0466	-0.153	0.0344	0.441
ONC0000966	RSV604	Phase 2	RSV replication inhibitor				1.48	0.99	1.13	1.07	0.96	1.11	1.2	0.252	1047	0.0777	0.966	1	0.799	1	-0.153	0.203	0.71
ONC0005361	ALPRENOLOL HYDROCHLORIDE	NA	NA	NA	NA	NA	1.27	1.39	1.15	1.07	1.22	1.06	1.27	0.12	1117	0.0896	0.994	1	0.972	1	-0.153	0.0783	0.582
ONC0001200	Eltoprazine (hydrochloride)	NA	NA	NA	NA	NA	0.94	0.91	1.49	0.93	0.93	1.02	1113	0.327	0.96	0.052	0.84	0.979	0.31	0.826	-0.153	0.251	0.76
ONC0005311	medica-16	Phase 2	ATP citrase lyase inhibitor	FFAR1			1.07	0.94	1.38	1.02	0.92	0.99	1.13	0.226	0.977	0.0513	0.876	0.99	0.406	0.902	-0.153	0.18	0.697
ONC0002140	CGP-20712A	Preclinical	adrenergic receptor antagonist	ADRB1|ADRB3			1.14	0.97	1.05	1.01	0.96	0.74	1053	0.085	0.903	0.144	0.661	0.916	0.0856	0.393	-0.15	0.105	0.616
ONC0002167	Octreotide (acetate)	NA	NA	NA	NA	NA	0.98	1.17	1.03	0.88	0.83	1.02	1.06	0.0985	0.91	0.0985	0.684	0.925	0.103	0.446	-0.15	0.0678	0.565
ONC0004686	Ganetespib (STA-9090)	NA	NA	NA	NA	NA	0.12	0.36	0.58	0.13	0.31	0.17	0.353	0.23	0.203	0.0945	1.25e-10	4.8e-09	2.81e-34	1.11e-32	-0.15	0.191	0.705
ONC0002147	dienestrol	Launched	estrogen receptor agonist	ESR1	endocrinology	menopause	0.97	1.2	0.99	0.78	0.99	0.94	1053	0.127	0.903	0.11	0.661	0.916	0.0856	0.393	-0.15	0.0994	0.611
ONC0004840	Tazarotene (Avage)	NA	NA	NA	NA	NA	1.36	0.85	0.98	0.87	0.91	0.96	1063	0.265	0.913	0.0451	0.695	0.93	0.112	0.472	-0.15	0.215	0.726
ONC0004113	Brequinar sodium salt hydrate	NA	NA	NA	NA	NA	0.59	1.03	0.78	0.65	0.56	0.74	0.8	0.221	0.65	0.09	0.0214	0.186	6.79e-08	8.83e-07	-0.15	0.182	0.701
ONC0003573	scriptaid	Preclinical	HDAC inhibitor	HDAC1|HDAC2|HDAC3|HDAC4|HDAC5|HDAC6|HDAC7|HDAC8|HDAC9			0.98	0.82	0.77	0.75	0.75	0.62	0.857	0.11	0.707	0.0751	0.0696	0.388	5.46e-06	6.12e-05	-0.15	0.0658	0.561
ONC0003564	1-(4-fluorophenyl)-4-(3,4,5-trimethoxybenzyl)piperazine	NA	NA	NA	NA	NA	1.08	0.99	1.05	0.78	0.82	1.07	1.04	0.0458	0.89	0.157	0.613	0.897	0.0578	0.295	-0.15	0.118	0.63
ONC0004381	Apremilast (CC-10004) __ Apremilast (CC-10004)	NA	NA	NA	NA	NA	1.02	1.16	1.53	1.18	0.98	1.1	1237	0.264	1087	0.101	0.985	1	0.927	1	-0.15	0.218	0.727
ONC0004658	Pictilisib (GDC-0941)	NA	NA	NA	NA	NA	0.68	1	1	0.68	0.86	0.69	0.893	0.185	0.743	0.101	0.13	0.532	6.33e-05	0.000644	-0.15	0.151	0.664
ONC0003617	NAB-2	Preclinical	ubiquitin ligase transport promoter	NEDD4			0.92	1.03	0.84	0.82	0.69	0.83	0.93	0.0954	0.78	0.0781	0.22	0.682	0.000541	0.00491	-0.15	0.0527	0.523
ONC0005116	VER-49009	Preclinical	HSP inhibitor	HSP90AA1			0.93	0.98	0.75	0.63	0.92	0.66	0.887	0.121	0.737	0.159	0.117	0.507	4.15e-05	0.00043	-0.15	0.134	0.641
ONC0004283	Istradefylline	Launched	adenosine receptor antagonist	ADORA1|ADORA2A|ADORA2B|ADORA3	neurology/psychiatry	Parkinson's Disease|dyskinesia	0.91	0.94	1.08	0.69	0.95	0.84	0.977	0.0907	0.827	0.131	0.373	0.785	0.0054	0.0411	-0.15	0.093	0.606
ONC0003017	ganaxolone	Phase 3	GABA receptor modulator	GABRA1|GABRA2|GABRA3|GABRA4|GABRA5|GABRA6			0.95	0.97	1.39	0.94	1.07	0.85	1103	0.248	0.953	0.111	0.815	0.972	0.275	0.784	-0.15	0.208	0.718
ONC0003431	SC-10	Preclinical	protein kinase activator	PRKCA			1.34	1.13	0.98	0.94	0.98	1.08	1.15	0.181	1	0.0721	0.911	1	0.548	0.978	-0.15	0.143	0.652
ONC0000721	AMPA-(S)	Preclinical	glutamate receptor agonist	GRIA2|GRIN1			1.16	1.14	1.27	0.97	1.11	1.04	1.19	0.07	1.04	0.07	0.958	1	0.769	1	-0.15	0.0293	0.413
ONC0002262	Ademetionine	Launched	methyltransferase stimulant|phosphodiesterase inhibitor		neurology/psychiatry	depression|attention-deficit/hyperactivity disorder (ADHD)	1.42	1	1.28	1.05	1.17	1.03	1233	0.214	1083	0.0757	0.984	1	0.92	1	-0.15	0.175	0.69
ONC0001323	JDTic (dihydrochloride)	NA	NA	NA	NA	NA	0.66	1.42	1.18	1.01	0.87	0.93	1087	0.389	0.937	0.0702	0.769	0.954	0.196	0.658	-0.15	0.287	0.8
ONC0001350	ZM-306416	Preclinical	Abl kinase inhibitor|SRC inhibitor|VEGFR inhibitor	EGFR|FLT1|FLT4|KDR			1.12	1.23	1.01	1.02	0.94	0.95	1.12	0.11	0.97	0.0436	0.855	0.984	0.366	0.877	-0.15	0.0644	0.558
ONC0005584	L-Aspartic-Acid	Launched	metallic radical formation stimulant	ACY1|ACY3|ADSS|ADSSL1|ASNS|ASPA|ASPH|ASRGL1|ASS1|CAD|DARS|DARS2|GOT1|GOT2|GRIN1|GRIN2A|GRIN2B|GRIN2C|GRIN2D|LYZ|PAICS|RNASE1|SLC1A1|SLC25A12|SLC25A13			1.04	1	1.05	0.87	0.82	0.95	1.03	0.0265	0.88	0.0656	0.575	0.879	0.042	0.232	-0.15	0.0216	0.375
ONC0002739	viomycin	Launched	protein synthesis inhibitor		infectious disease	tuberculosis	1.02	1.22	1.09	0.85	1.03	1	1.11	0.101	0.96	0.0964	0.832	0.975	0.31	0.826	-0.15	0.0686	0.565
ONC0002006	(+)-ButaclamolHCl	NA	NA	NA	NA	NA	1.13	0.96	1.51	1.12	1.2	0.83	1.2	0.282	1.05	0.195	0.966	1	0.814	1	-0.15	0.248	0.759
ONC0001720	FIPI	Preclinical	phospholipase inhibitor	PLD1|PLD2			0.83	0.84	0.93	0.75	0.66	0.74	0.867	0.0551	0.717	0.0493	0.0834	0.429	1.1e-05	0.00012	-0.15	0.0125	0.318
ONC0002941	hexylcaine	Launched	sodium channel blocker	SCN5A	neurology/psychiatry	local anesthetic	1.01	1.19	1.43	0.91	1.21	1.06	1.21	0.211	1.06	0.15	0.973	1	0.852	1	-0.15	0.189	0.705
ONC0002935	nifurtimox	Launched	DNA inhibitor		infectious disease	Chagas disease|African trypanosomiasis	1.21	1.11	1.1	0.99	0.98	1	1.14	0.0608	0.99	0.01	0.894	0.998	0.487	0.945	-0.15	0.0237	0.39
ONC0004181	ETHOSUXIMIDE	Launched	succinimide antiepileptic	CACNA1G|CACNA1H|CACNA1I	neurology/psychiatry	epilepsy	1.29	1.29	1	1.07	0.89	1.18	1193	0.167	1047	0.146	0.961	1	0.799	1	-0.147	0.159	0.672
ONC0004496	BI-D1870	Preclinical	ribosomal protein inhibitor	RPS6KA1|RPS6KA2|RPS6KA3|RPS6KA6			0.54	0.52	0.95	0.33	0.59	0.65	0.67	0.243	0.523	0.17	0.000525	0.00901	2.56e-13	4.26e-12	-0.147	0.222	0.733
ONC0004152	LIOTHYRONINE (L- isomer) SODIUM	NA	NA	NA	NA	NA	1.13	1.17	1.11	1.01	1.04	0.92	1137	0.0306	0.99	0.0624	0.888	0.995	0.487	0.945	-0.147	0.0187	0.367
ONC0005045	Gliquidone	Launched	sulfonylurea	ABCC8|KCNJ10|KCNJ8	endocrinology	diabetes mellitus	1.02	1.14	1.39	1.16	0.99	0.96	1183	0.189	1037	0.108	0.952	1	0.754	1	-0.147	0.161	0.676
ONC0004855	Loteprednol etabonate	NA	NA	NA	NA	NA	1.31	1.09	1.41	1.1	1.17	1.1	1.27	0.164	1123	0.0404	0.994	1	0.978	1	-0.147	0.129	0.632
ONC0004367	Rociletinib (CO-1686, AVL-301)	NA	NA	NA	NA	NA	0.2	0.44	0.62	0.13	0.34	0.35	0.42	0.211	0.273	0.124	6.56e-09	2.12e-07	8.44e-29	2.5e-27	-0.147	0.185	0.703
ONC0004951	Sitafloxacin hydrate	NA	NA	NA	NA	NA	0.88	1.51	0.98	1	0.85	1.08	1123	0.339	0.977	0.117	0.862	0.986	0.406	0.902	-0.147	0.27	0.777
ONC0004655	LX1606 hippurate	NA	NA	NA	NA	NA	1.18	1.35	0.82	0.96	0.92	1.03	1117	0.271	0.97	0.0557	0.847	0.98	0.366	0.877	-0.147	0.224	0.735
ONC0002474	GSK269962	Preclinical	rho associated kinase inhibitor	ROCK1|ROCK2			0.72	0.5	0.56	0.53	0.47	0.34	0.593	0.114	0.447	0.0971	2.97e-05	0.000653	2.17e-17	4.32e-16	-0.147	0.0832	0.587
ONC0002895	MIDODRINE HYDROCHLORIDE	NA	NA	NA	NA	NA	1	0.99	1.32	0.93	0.95	0.99	1103	0.188	0.957	0.0306	0.815	0.972	0.292	0.806	-0.147	0.154	0.664
ONC0004238	BCX 1470 (methanesulfonate)	NA	NA	NA	NA	NA	0.96	1.02	0.92	0.99	0.57	0.9	0.967	0.0503	0.82	0.221	0.337	0.769	0.004	0.0316	-0.147	0.185	0.703
ONC0003022	BAZ2-ICR	Preclinical	bromodomain inhibitor	ZNF215			0.85	1	1.48	0.74	1.15	1	1.11	0.329	0.963	0.207	0.832	0.975	0.329	0.839	-0.147	0.278	0.789
ONC0000197	CH223191	Preclinical	aryl hydrocarbon receptor antagonist	AHR			0.76	0.94	1.22	0.85	0.78	0.85	0.973	0.232	0.827	0.0404	0.361	0.778	0.0054	0.0411	-0.147	0.194	0.706
ONC0002717	SR-27897	Phase 2	CCK receptor antagonist	CCKAR			1.05	1.16	1.34	1.04	1.05	1.02	1183	0.146	1037	0.0153	0.952	1	0.754	1	-0.147	0.112	0.622
ONC0002459	NEVIRAPINE	Launched	non-nucleoside reverse transcriptase inhibitor	CYP1A2|CYP2A6|CYP2B6|CYP2C9|CYP2D6|CYP3A4|CYP3A5	infectious disease	human immunodeficiency virus (HIV-1)	1.05	0.97	1.12	0.93	0.69	1.08	1047	0.0751	0.9	0.197	0.637	0.909	0.0779	0.368	-0.147	0.163	0.681
ONC0001384	AMG-9810	Preclinical	TRPV antagonist	TRPV1			1.11	1.18	1.01	1.06	0.82	0.98	1.1	0.0854	0.953	0.122	0.806	0.968	0.275	0.784	-0.147	0.086	0.595
ONC0000337	ACETYLCYSTEINE	Launched	mucolytic agent	ACY1|CHUK|GRIN1|GRIN2A|GRIN2B|GRIN2D|GRIN3A|GSS|IKBKB|RELA|SLC7A11	gastroenterology	acetaminophen overdose|hepatic injury	0.94	1.15	1.08	0.95	0.76	1.02	1057	0.107	0.91	0.135	0.673	0.923	0.103	0.446	-0.147	0.108	0.621
ONC0001621	TCN-238	Preclinical	glutamate receptor positive allosteric modulator	GRM4			1.16	1.12	0.91	0.9	1.01	0.84	1063	0.134	0.917	0.0862	0.695	0.93	0.122	0.499	-0.147	0.0994	0.611
ONC0000171	nTZDpa	Preclinical	PPAR receptor agonist	PPARG			1.15	1.12	0.98	1.01	0.98	0.82	1083	0.0907	0.937	0.102	0.759	0.95	0.196	0.658	-0.147	0.0687	0.565
ONC0005478	mofezolac	Launched	cyclooxygenase inhibitor	PTGS1	rheumatology|orthopedics	rheumatoid arthritis|osteoporosis	1.09	0.93	1.56	1.04	1.07	1.03	1193	0.327	1047	0.0208	0.961	1	0.799	1	-0.147	0.26	0.769
ONC0002740	AY-9944	Preclinical	hedgehog pathway modulator				1.24	1.19	1.07	0.99	1.02	1.05	1167	0.0874	1.02	0.03	0.934	1	0.666	1	-0.147	0.044	0.493
ONC0002799	Amezinium methyl sulfate	NA	NA	NA	NA	NA	1.08	1.4	1.02	1.01	1.05	1	1167	0.204	1.02	0.0265	0.934	1	0.666	1	-0.147	0.17	0.687
ONC0003255	pyridoxal	Launched		PDXK	neurology/psychiatry	epilepsy	1.08	0.58	1.4	0.9	0.85	0.87	1.02	0.413	0.873	0.0252	0.537	0.863	0.0336	0.195	-0.147	0.301	0.813
ONC0002814	2-methyl-1H-imidazole	NA	NA	NA	NA	NA	0.97	1.27	1.17	1	0.96	1.01	1137	0.153	0.99	0.0265	0.888	0.995	0.487	0.945	-0.147	0.118	0.63
ONC0000499	PRIMIDONE	Launched	GABA receptor antagonist	CHRNA4|CHRNA7|GABRA1|GABRA2|GABRA3|GABRA4|GABRA5|GABRA6|GABRB1|GABRB2|GABRB3|GABRD|GABRE|GABRG1|GABRG2|GABRG3|GABRP|GABRQ|GRIA2|GRIK2|SCN10A|SCN11A|SCN1A|SCN2A|SCN3A|SCN4A|SCN5A|SCN7A|SCN8A|SCN9A	neurology/psychiatry	seizures	1.15	1.11	1.01	1.06	0.77	1	1.09	0.0721	0.943	0.153	0.779	0.959	0.226	0.711	-0.147	0.118	0.63
ONC0000075	VU0361737	Preclinical	glutamate receptor positive allosteric modulator	GRM4			0.87	1.07	0.97	0.72	0.93	0.82	0.97	0.1	0.823	0.105	0.349	0.774	0.00465	0.0361	-0.147	0.0774	0.582
ONC0000906	Biapenem	Launched	bacterial cell wall synthesis inhibitor		infectious disease	bacterial septicemia|pneumonia|urinary tract infections	1.46	0.92	1.06	1.08	0.98	0.94	1147	0.28	1	0.0721	0.906	1	0.548	0.978	-0.147	0.232	0.744
ONC0001925	BTS-72664	Phase 1	GABA receptor antagonist	GABBR1			1	1.02	0.97	0.72	0.97	0.86	0.997	0.0252	0.85	0.125	0.448	0.825	0.0143	0.0945	-0.147	0.0878	0.597
ONC0001673	triciribine	Phase 1/Phase 2	AKT inhibitor	AKT1|AKT2|AKT3			0.65	0.89	0.93	0.75	0.57	0.71	0.823	0.151	0.677	0.0945	0.0359	0.264	5.87e-07	7.08e-06	-0.147	0.12	0.63
ONC0001758	L-760735	Preclinical	tachykinin antagonist	TACR1			1.21	1.03	1	0.88	0.93	0.99	1.08	0.114	0.933	0.0551	0.749	0.947	0.182	0.63	-0.147	0.0705	0.567
ONC0001815	APTO-253	Phase 1	krÃ¼ppel-like factor expression enhancer	KLF4			0.66	0.87	1	0.7	0.69	0.7	0.843	0.172	0.697	0.00577	0.054	0.336	2.66e-06	3.04e-05	-0.147	0.138	0.647
ONC0001729	SB-216763	Preclinical	glycogen synthase kinase inhibitor	CCNA2|CDK2|GSK3A|GSK3B			1.11	1.06	1.05	1.01	0.94	0.83	1073	0.0321	0.927	0.0907	0.728	0.942	0.157	0.579	-0.147	0.0472	0.498
ONC0005415	glucaric-acid	Phase 1					1.07	0.85	0.94	0.98	0.76	0.68	0.953	0.111	0.807	0.155	0.292	0.741	0.00214	0.0177	-0.147	0.13	0.633
ONC0005322	furegrelate	Phase 1	thromboxane synthase inhibitor	TBXAS1			0.97	1.23	0.96	0.84	0.94	0.94	1053	0.153	0.907	0.0577	0.661	0.916	0.0939	0.419	-0.147	0.117	0.63
ONC0005280	M344	Preclinical	HDAC inhibitor	HDAC8			0.79	1.07	0.83	0.75	0.79	0.72	0.897	0.151	0.753	0.0351	0.137	0.55	0.000117	0.00115	-0.143	0.12	0.63
ONC0005207	Naringenin	Phase 1	aromatase inhibitor|TRPV antagonist	CYP19A1|CYP1B1|ESR2|GLO1|HSD17B1			0.86	0.82	1.57	0.73	0.99	1.1	1083	0.422	0.94	0.19	0.759	0.95	0.211	0.681	-0.143	0.316	0.825
ONC0004034	ARIPIPRAZOLE	Launched	serotonin receptor agonist|serotonin receptor antagonist	ADRA1A|ADRA1B|ADRA2A|ADRA2B|ADRA2C|CHRM1|CHRM2|CHRM3|CHRM4|CHRM5|DRD1|DRD2|DRD3|DRD4|DRD5|HRH1|HTR1A|HTR1B|HTR1D|HTR1E|HTR2A|HTR2C|HTR3A|HTR6|HTR7	neurology/psychiatry	depression|schizophrenia|bipolar disorder	0.53	0.97	1.15	0.81	0.85	0.56	0.883	0.319	0.74	0.157	0.111	0.491	5.13e-05	0.000526	-0.143	0.268	0.775
ONC0004616	BIBR-1048 (Dabigatran)	NA	NA	NA	NA	NA	1.25	1.15	1	0.95	0.98	1.04	1133	0.126	0.99	0.0458	0.882	0.993	0.487	0.945	-0.143	0.089	0.6
ONC0004963	CCT129202	Preclinical	Aurora kinase inhibitor	AURKA|AURKB|AURKC			1.33	1.11	1.12	1	1.12	1.01	1187	0.124	1043	0.0666	0.955	1	0.785	1	-0.143	0.0873	0.597
ONC0003921	VARDENAFIL HYDROCHLORIDE	NA	NA	NA	NA	NA	0.96	0.97	0.76	0.82	0.73	0.71	0.897	0.118	0.753	0.0586	0.137	0.55	0.000117	0.00115	-0.143	0.0797	0.583
ONC0003932	FENOLDOPAM MESYLATE	NA	NA	NA	NA	NA	1.04	1	1.02	0.94	0.71	0.98	1.02	0.02	0.877	0.146	0.537	0.863	0.0376	0.214	-0.143	0.114	0.627
ONC0002679	Saroglitazar	Launched	PPAR receptor agonist	PPARA|PPARG	endocrinology|cardiology|gastroenterology	diabetes mellitus|dyslipidemia|non-alcoholic steatohepatitis (NASH)	0.76	1.12	1.31	1	0.91	0.85	1063	0.279	0.92	0.0755	0.695	0.93	0.133	0.526	-0.143	0.236	0.746
ONC0000749	EPHEDRINE (1R,2S) HYDROCHLORIDE	NA	NA	NA	NA	NA	0.92	1.25	1.09	1	0.82	1.01	1087	0.165	0.943	0.107	0.769	0.954	0.226	0.711	-0.143	0.143	0.652
ONC0002620	U-0126	Preclinical	MEK inhibitor	AKT1|CHEK1|GSK3B|LCK|MAP2K1|MAP2K2|MAP2K7|MAPK1|MAPK11|MAPK12|MAPK14|MAPK8|PRKCA|RAF1|ROCK1|RPS6KB1|SGK1			1.11	1.22	1.08	0.99	1	0.99	1137	0.0737	0.993	0.00577	0.888	0.995	0.507	0.957	-0.143	0.0386	0.467
ONC0002423	PRONETALOL HYDROCHLORIDE	NA	NA	NA	NA	NA	1.29	0.92	1.03	0.73	1.05	1.03	1.08	0.19	0.937	0.179	0.749	0.947	0.196	0.658	-0.143	0.198	0.708
ONC0001294	17-PA	Preclinical	glucocorticoid receptor agonist				1.31	1.24	0.93	0.99	1.07	0.99	1.16	0.202	1017	0.0462	0.925	1	0.647	1	-0.143	0.172	0.687
ONC0001806	SF-11	Preclinical	neuropeptide receptor antagonist	MCOLN3|NPY2R			1.4	0.92	1.17	1.02	1	1.04	1163	0.24	1.02	0.02	0.93	1	0.666	1	-0.143	0.205	0.713
ONC0000964	Auranofin	Launched	NFkB pathway inhibitor	IKBKB|PRDX5|TRPA1	rheumatology	rheumatoid arthritis	1.14	0.96	0.97	0.95	1.07	0.62	1023	0.101	0.88	0.233	0.55	0.868	0.042	0.232	-0.143	0.203	0.71
ONC0001680	GANT-58	Preclinical	GLI antagonist	GLI1			1.05	1.18	1.1	1.04	0.96	0.9	1.11	0.0656	0.967	0.0702	0.832	0.975	0.347	0.857	-0.143	0.0307	0.418
ONC0005365	nibentan	Phase 2	potassium channel blocker				0.83	0.96	1.41	0.87	0.92	0.98	1067	0.304	0.923	0.0551	0.707	0.935	0.145	0.552	-0.143	0.251	0.76
ONC0002200	AZD5582	Preclinical	XIAP inhibitor	BIRC2|BIRC3|XIAP			0.84	0.59	0.55	0.58	0.44	0.54	0.66	0.157	0.52	0.0721	0.000371	0.00673	1.75e-13	2.95e-12	-0.14	0.131	0.633
ONC0004793	(R)-baclofen	Phase 3	benzodiazepine receptor agonist	GABBR1|GABBR2			1.03	1.2	1.15	0.97	0.97	1.02	1127	0.0874	0.987	0.0289	0.869	0.988	0.466	0.944	-0.14	0.0486	0.505
ONC0004117	FLUVOXAMINE MALEATE	NA	NA	NA	NA	NA	0.87	1.11	0.94	0.78	0.71	1.01	0.973	0.123	0.833	0.157	0.361	0.778	0.00721	0.0527	-0.14	0.147	0.654
ONC0005240	Degrasyn (WP1130)	NA	NA	NA	NA	NA	0.82	0.83	0.94	0.81	0.77	0.59	0.863	0.0666	0.723	0.117	0.0785	0.415	1.73e-05	0.000185	-0.14	0.0825	0.586
ONC0004144	VALACYCLOVIR HYDROCHLORIDE	NA	NA	NA	NA	NA	1.26	1.42	1	1.03	1.16	1.07	1227	0.212	1087	0.0666	0.981	1	0.927	1	-0.14	0.186	0.705
ONC0004216	PROCARBAZINE HYDROCHLORIDE	NA	NA	NA	NA	NA	0.96	1.13	1.05	1.04	0.87	0.81	1047	0.085	0.907	0.119	0.637	0.909	0.0939	0.419	-0.14	0.0904	0.604
ONC0004387	TAK-632	Preclinical	RAF inhibitor	BRAF			1.23	0.94	1.13	1.02	0.99	0.87	1.1	0.147	0.96	0.0794	0.806	0.968	0.31	0.826	-0.14	0.121	0.63
ONC0005048	VE-822	Phase 2	ATR kinase inhibitor	ATM|ATR|MTOR|PIK3CG			0.72	0.77	0.72	0.58	0.65	0.56	0.737	0.0289	0.597	0.0473	0.00421	0.0528	5.56e-10	8.2e-09	-0.14	0.00897	0.295
ONC0003951	DPO-1	Preclinical	potassium channel blocker	KCNA5			0.93	1.2	0.94	1.07	0.74	0.84	1023	0.153	0.883	0.169	0.55	0.868	0.0468	0.252	-0.14	0.174	0.689
ONC0003024	alprostadil	Launched	prostanoid receptor agonist	CATSPER1|CATSPER2|CATSPER3|CATSPER4|PTGDR|PTGER1|PTGER2|PTGER4|PTGIR	cardiology	congenital heart defects	1.22	0.94	1.47	1.07	1.02	1.12	1.21	0.265	1.07	0.05	0.973	1	0.885	1	-0.14	0.229	0.741
ONC0003019	FGIN-1-27	Preclinical	inositol monophosphatase inhibitor	TSPO			1.03	1.04	0.94	0.99	0.84	0.76	1003	0.0551	0.863	0.117	0.473	0.837	0.0236	0.147	-0.14	0.0809	0.584
ONC0002722	CGK-733	Preclinical	ATM kinase inhibitor|ATR kinase inhibitor	ATM|ATR			0.91	0.97	1.22	0.81	0.84	1.03	1033	0.164	0.893	0.119	0.588	0.885	0.064	0.318	-0.14	0.152	0.664
ONC0000253	PNU-74654	Preclinical	beta-catenin inhibitor	CTNNB1|TCF4			1.21	0.99	1.28	1	1.19	0.87	1.16	0.151	1.02	0.161	0.925	1	0.666	1	-0.14	0.167	0.685
ONC0002605	Se-methylseleno-L-cysteine	NA	NA	NA	NA	NA	1	1.22	1	0.99	0.9	0.91	1073	0.127	0.933	0.0493	0.728	0.942	0.182	0.63	-0.14	0.0938	0.606
ONC0001142	2'-Deoxycytidine (hydrochloride)	NA	NA	NA	NA	NA	0.89	1.22	1.06	0.96	0.75	1.04	1057	0.165	0.917	0.15	0.673	0.923	0.122	0.499	-0.14	0.169	0.687
ONC0001379	Tasquinimod	Phase 3	angiogenesis inhibitor|S100A9 inhibitor	HDAC4			1.05	1.02	1	0.75	1.03	0.87	1023	0.0252	0.883	0.14	0.55	0.868	0.0468	0.252	-0.14	0.112	0.622
ONC0002442	Nirogacestat	NA	NA	NA	NA	NA	1.03	1	1.16	0.89	0.89	0.99	1063	0.085	0.923	0.0577	0.695	0.93	0.145	0.552	-0.14	0.0433	0.49
ONC0003470	Troglitazone	Withdrawn	insulin sensitizer|PPAR receptor agonist	CYP2C8|PPARG|TRPM3			0.98	1.28	0.86	1	0.7	1	1.04	0.216	0.9	0.173	0.613	0.897	0.0779	0.368	-0.14	0.217	0.727
ONC0000116	CMPD-1	Preclinical	p38 MAPK inhibitor	GNRHR|MAPK14			0.63	0.75	1.15	0.82	0.59	0.7	0.843	0.272	0.703	0.115	0.054	0.336	4.31e-06	4.87e-05	-0.14	0.239	0.748
ONC0000819	GDC-0834 (Racemate)	NA	NA	NA	NA	NA	0.98	1.05	1.19	0.9	0.9	1	1073	0.107	0.933	0.0577	0.728	0.942	0.182	0.63	-0.14	0.0689	0.565
ONC0005509	AMOXAPINE	Launched	norepinephrine reputake inhibitor	ADRA1A|ADRA1B|ADRA1D|ADRA2A|ADRA2B|ADRA2C|CHRM1|CHRM2|CHRM3|CHRM4|CHRM5|DRD1|DRD2|DRD3|DRD4|DRD5|GABRA1|GABRA2|GABRA3|GABRA4|GABRA5|GABRA6|GABRB1|GABRB2|GABRB3|GABRD|GABRE|GABRG1|GABRG2|GABRG3|GABRP|GABRQ|HRH1|HRH4|HTR1A|HTR1B|HTR2A|HTR2B|HTR2C|HTR3A|HTR6|HTR7|SLC6A2|SLC6A3|SLC6A4	neurology/psychiatry	depression	1.03	1.24	1	0.96	0.93	0.96	1.09	0.131	0.95	0.0173	0.779	0.959	0.258	0.761	-0.14	0.102	0.614
ONC0000904	S26948	Preclinical	PPAR receptor agonist	PPARG			1.02	0.84	0.8	0.65	0.86	0.73	0.887	0.117	0.747	0.106	0.117	0.507	7.79e-05	0.000786	-0.14	0.1	0.611
ONC0001913	terlipressin	Launched	vasopressin receptor agonist	AVPR1A	cardiology	hypotension	1	0.97	1.01	0.63	0.98	0.95	0.993	0.0208	0.853	0.194	0.435	0.817	0.0162	0.106	-0.14	0.169	0.687
ONC0001728	acifran	Phase 3	cholesterol inhibitor	HCAR2|HCAR3			1.13	1.29	1.16	1.07	1.03	1.06	1193	0.085	1053	0.0208	0.961	1	0.827	1	-0.14	0.0483	0.504
ONC0004326	Cabotegravir (GSK744, GSK1265744)	NA	NA	NA	NA	NA	0.82	1.18	1.18	1.06	0.74	0.97	1.06	0.208	0.923	0.165	0.684	0.925	0.145	0.552	-0.137	0.213	0.724
ONC0004386	SRT2104 (GSK2245840)	NA	NA	NA	NA	NA	1.02	1	0.97	0.89	0.85	0.84	0.997	0.0252	0.86	0.0265	0.448	0.825	0.0209	0.132	-0.137	0.00147	0.154
ONC0004661	17-DMAG HCl (Alvespimycin)	NA	NA	NA	NA	NA	0.22	0.44	0.42	0.13	0.27	0.27	0.36	0.122	0.223	0.0808	1.89e-10	7.11e-09	1.16e-32	4.09e-31	-0.137	0.0955	0.61
ONC0003635	2-Iminobiotin	Phase 2	nitric oxide synthase inhibitor	NOS1|NOS2			1	1.25	0.91	0.93	0.87	0.95	1053	0.176	0.917	0.0416	0.661	0.916	0.122	0.499	-0.137	0.155	0.664
ONC0003823	Metocurine	Launched	acetylcholine receptor antagonist	CHRM2|CHRNA2	neurology/psychiatry	muscle relaxant	1.01	1.18	1.4	1	1.17	1.01	1197	0.196	1.06	0.0954	0.964	1	0.852	1	-0.137	0.179	0.695
ONC0002523	NBI-74330-(+/-)	Preclinical	CC chemokine receptor antagonist	CXCR3			0.83	1.45	0.97	0.85	1.04	0.95	1083	0.325	0.947	0.095	0.759	0.95	0.242	0.735	-0.137	0.274	0.783
ONC0003432	GR 103691	NA	NA	NA	NA	NA	1.02	0.79	0.91	0.65	0.79	0.87	0.907	0.115	0.77	0.111	0.159	0.585	0.00031	0.0029	-0.137	0.107	0.62
ONC0002893	neo-gilurytmal	Launched			cardiology	cardiac arrythmia	0.83	1.37	0.97	0.89	0.85	1.02	1057	0.28	0.92	0.0889	0.673	0.923	0.133	0.526	-0.137	0.246	0.758
ONC0000262	iodophenpropit	Preclinical	histamine receptor antagonist	HRH3|HRH4			1.04	0.99	1.03	0.9	0.75	1	1.02	0.0265	0.883	0.126	0.537	0.863	0.0468	0.252	-0.137	0.0983	0.611
ONC0000236	JW-55	Preclinical	tankyrase inhibitor	TNKS|TNKS2			1.31	0.72	0.76	0.77	0.81	0.8	0.93	0.33	0.793	0.0208	0.22	0.682	0.0011	0.0095	-0.137	0.274	0.783
ONC0000237	CPSI-1306-(+/-)	Preclinical	macrophage migration inhibiting factor inhibitor	MIF			1.05	1.13	1.14	0.84	1.05	1.02	1107	0.0493	0.97	0.114	0.823	0.974	0.366	0.877	-0.137	0.0805	0.584
ONC0002420	Serabelisib	NA	NA	NA	NA	NA	1.28	1.08	1.16	1.05	1.05	1.01	1173	0.101	1037	0.0231	0.942	1	0.754	1	-0.137	0.0684	0.565
ONC0000299	Propiverine Hydrochloride	NA	NA	NA	NA	NA	1.11	1.04	1.08	0.98	0.96	0.88	1077	0.0351	0.94	0.0529	0.739	0.947	0.211	0.681	-0.137	0.013	0.321
ONC0001672	3,4-DCPG-(+/-)	Preclinical	glutamate receptor agonist	GRM8			1.01	1.23	1.08	0.97	0.94	1	1107	0.112	0.97	0.03	0.823	0.974	0.366	0.877	-0.137	0.0814	0.584
ONC0003501	Thiorphan	Phase 1	membrane metalloendopeptidase inhibitor	MME			0.98	1.15	1	1.04	0.93	0.75	1043	0.0929	0.907	0.146	0.625	0.903	0.0939	0.419	-0.137	0.128	0.632
ONC0000128	SN-2	Preclinical	transient receptor potential channel agonist	MCOLN3			1	1.42	1.13	1.04	1.06	1.04	1183	0.215	1047	0.0115	0.952	1	0.799	1	-0.137	0.193	0.706
ONC0001299	JNJ-42165279	Phase 2	FAAH inhibitor	FAAH			1.13	1.11	0.97	0.96	0.84	1	1.07	0.0872	0.933	0.0833	0.717	0.938	0.182	0.63	-0.137	0.0606	0.546
ONC0005503	boronophenylalanine	Phase 2					1.24	1.24	1	1.02	1	1.05	1.16	0.139	1023	0.0252	0.925	1	0.684	1	-0.137	0.114	0.623
ONC0000869	N20C	Preclinical	glutamate receptor antagonist				0.95	1.01	1.06	0.96	0.99	0.66	1007	0.0551	0.87	0.182	0.486	0.843	0.0299	0.177	-0.137	0.162	0.677
ONC0000555	DICYCLOMINE HYDROCHLORIDE	NA	NA	NA	NA	NA	1.26	0.99	1.09	1.1	1	0.83	1113	0.137	0.977	0.137	0.84	0.979	0.406	0.902	-0.137	0.144	0.653
ONC0000960	Zaurategrast	NA	NA	NA	NA	NA	1.03	1.48	0.98	0.83	1.25	1	1163	0.275	1027	0.211	0.93	1	0.703	1	-0.137	0.268	0.774
ONC0001885	3-CPMT	Preclinical	dopamine reuptake inhibitor				1.11	1.16	1.01	0.95	0.98	0.94	1093	0.0764	0.957	0.0208	0.788	0.963	0.292	0.806	-0.137	0.0406	0.475
ONC0001762	Icaritin	Phase 3	PPAR receptor antagonist	PDE5A			0.95	0.91	1.35	0.86	0.99	0.95	1.07	0.243	0.933	0.0666	0.717	0.938	0.182	0.63	-0.137	0.218	0.727
ONC0001827	PP-2	Preclinical	SRC inhibitor	ABL1|LCK|RIPK2|SRC			1.1	1.08	0.98	1.12	0.71	0.92	1053	0.0643	0.917	0.205	0.661	0.916	0.122	0.499	-0.137	0.185	0.703
ONC0001970	P1,P4-DI(adenosine-5')tetraphosphate ammonium salt	NA	NA	NA	NA	NA	1.12	1.19	1.04	0.99	1.02	0.93	1117	0.0751	0.98	0.0458	0.847	0.98	0.426	0.919	-0.137	0.0334	0.431
ONC0005360	NIFUROXAZIDE	Launched	bacterial DNA inhibitor		gastroenterology	colitis|diarrhea	0.9	1.13	1.2	0.97	1	0.85	1077	0.157	0.94	0.0794	0.739	0.947	0.211	0.681	-0.137	0.136	0.643
ONC0005421	Iguratimod	Launched	cyclooxygenase inhibitor|NFkB pathway inhibitor	PTGS2	rheumatology	rheumatoid arthritis	1.22	1.01	0.93	0.87	0.83	1.05	1053	0.15	0.917	0.117	0.661	0.916	0.122	0.499	-0.137	0.142	0.652
ONC0004810	Mirabegron (YM178)	NA	NA	NA	NA	NA	1.26	0.91	0.89	0.99	0.76	0.91	1.02	0.208	0.887	0.117	0.537	0.863	0.0521	0.274	-0.133	0.201	0.71
ONC0005273	Ambrisentan	Launched	endothelin receptor antagonist	EDNRA|EDNRB	pulmonary	pulmonary arterial hypertension (PAH)	1.13	1.08	1	0.81	0.96	1.04	1.07	0.0656	0.937	0.117	0.717	0.938	0.196	0.658	-0.133	0.0894	0.602
ONC0003712	xenalipin	Phase 2					1.02	1.22	1.01	0.93	0.95	0.97	1083	0.118	0.95	0.02	0.759	0.95	0.258	0.761	-0.133	0.0938	0.606
ONC0003716	piketoprofen	Launched	cyclooxygenase inhibitor		neurology/psychiatry	pain relief	0.98	1.34	1.04	0.97	1.03	0.96	1.12	0.193	0.987	0.0379	0.855	0.984	0.466	0.944	-0.133	0.177	0.693
ONC0003584	flurofamide	Preclinical	urease inhibitor				1.25	1.28	1.17	1.15	1.04	1.11	1233	0.0569	1.1	0.0557	0.984	1	0.952	1	-0.133	0.022	0.377
ONC0004429	SA-47	Preclinical	FAAH inhibitor	FAAH			1.17	1.19	0.81	1.02	0.74	1.01	1057	0.214	0.923	0.159	0.673	0.923	0.145	0.552	-0.133	0.219	0.729
ONC0003652	NI-57	Preclinical	bromodomain inhibitor	BRD1|BRPF1|BRPF3			1.04	1.5	0.99	1.02	1.01	1.1	1177	0.281	1043	0.0493	0.946	1	0.785	1	-0.133	0.25	0.76
ONC0003677	4-Fluoro-DL-glutamic acid	NA	NA	NA	NA	NA	0.75	1.29	1.35	1.01	1.01	0.97	1.13	0.33	0.997	0.0231	0.876	0.99	0.528	0.968	-0.133	0.279	0.789
ONC0004243	OLANZAPINE	Launched	dopamine receptor antagonist|serotonin receptor antagonist	ADRA1A|ADRA1B|ADRA2A|ADRA2B|ADRA2C|ADRB1|ADRB2|ADRB3|CHRM1|CHRM2|CHRM3|CHRM4|CHRM5|DRD1|DRD2|DRD3|DRD4|DRD5|GABRA1|GABRA2|GABRA3|GABRA4|GABRA5|GABRA6|GABRB1|GABRB2|GABRB3|GABRD|GABRE|GABRG1|GABRG2|GABRG3|GABRP|GABRQ|HRH1|HRH2|HRH4|HTR1A|HTR1B|HTR1D|HTR1E|HTR1F|HTR2A|HTR2B|HTR2C|HTR3A|HTR5A|HTR6|HTR7	neurology/psychiatry	schizophrenia|bipolar disorder	0.96	1.12	0.98	0.83	0.92	0.91	1.02	0.0872	0.887	0.0493	0.537	0.863	0.0521	0.274	-0.133	0.05	0.512
ONC0003926	CYCLANDELATE	Launched	calcium channel blocker		cardiology|rheumatology	claudication|arteriosclerosis|Raynaud's disease	1.05	1.26	0.98	0.97	0.9	1.02	1097	0.146	0.963	0.0603	0.797	0.966	0.329	0.839	-0.133	0.125	0.632
ONC0003052	pifithrin-mu	Preclinical	HSP inhibitor	HSPA1A|TP53			0.97	1.03	1.31	0.98	1.04	0.89	1103	0.181	0.97	0.0755	0.815	0.972	0.366	0.877	-0.133	0.167	0.685
ONC0000624	RONIDAZOLE	Launched	antiprotozoal agent		infectious disease	histomoniasis|dysentry	1.22	0.98	1	0.94	0.91	0.95	1067	0.133	0.933	0.0208	0.707	0.935	0.182	0.63	-0.133	0.111	0.622
ONC0000224	PSB-36	Preclinical	adenosine receptor antagonist	ADORA1|ADORA2A|ADORA2B|ADORA3			0.85	1.03	1.02	0.68	0.84	0.98	0.967	0.101	0.833	0.15	0.337	0.769	0.00721	0.0527	-0.133	0.14	0.65
ONC0002399	VENLAFAXINE HYDROCHLORIDE	NA	NA	NA	NA	NA	1.09	1	0.97	0.83	1	0.83	1.02	0.0624	0.887	0.0981	0.537	0.863	0.0521	0.274	-0.133	0.0653	0.56
ONC0002239	NVP-HSP990	Phase 1	HSP inhibitor	HSP90AA1|HSP90AB1			0.14	0.11	0.04	0.01	-0.06	-0.06	0.097	0.0513	-0.037	0.0404	6.93e-19	8.67e-17	7.15e-57	2.69e-54	-0.133	0.0132	0.321
ONC0001391	Oliceridine (hydrochloride)	NA	NA	NA	NA	NA	0.9	1.63	0.91	1.03	0.92	1.09	1147	0.419	1013	0.0862	0.906	1	0.628	1	-0.133	0.32	0.829
ONC0001588	TWS-119	Preclinical	glycogen synthase kinase inhibitor	GSK3B|JUN|MYC			0.75	0.84	1	0.68	0.84	0.67	0.863	0.127	0.73	0.0954	0.0785	0.415	2.69e-05	0.000283	-0.133	0.112	0.622
ONC0002368	opipramol	Launched	sigma receptor agonist		neurology/psychiatry	generalized anxiety disorder (GAD)	1	1	1.08	0.98	0.82	0.88	1027	0.0462	0.893	0.0808	0.563	0.874	0.064	0.318	-0.133	0.0422	0.481
ONC0001278	Solcitinib	Phase 1	JAK inhibitor	JAK1			1.41	0.91	0.89	0.9	1.08	0.83	1.07	0.295	0.937	0.129	0.717	0.938	0.196	0.658	-0.133	0.265	0.772
ONC0005601	citicoline	Launched	glutathione transferase stimulant|membrane permeability enhancer	ACHE|SLC1A2	neurology/psychiatry|ophthalmology	stroke|Alzheimer's disease|senile dementia|Parkinson's Disease|attention-deficit/hyperactivity disorder (ADHD)|glaucoma	0.97	1.3	0.97	1	0.8	1.04	1.08	0.191	0.947	0.129	0.749	0.947	0.242	0.735	-0.133	0.19	0.705
ONC0000862	KB-R7943	Preclinical	sodium/calcium exchange inhibitor	SLC8A1|TRPC3|TRPC5|TRPC6			1.13	1.35	1.08	1.05	1.11	1	1187	0.144	1053	0.0551	0.955	1	0.827	1	-0.133	0.122	0.63
ONC0002807	N,NŒ-Diacetyl-L-cystine	NA	NA	NA	NA	NA	0.86	1.18	1.39	0.91	1.12	1	1143	0.267	1.01	0.105	0.9	0.998	0.608	0.997	-0.133	0.244	0.755
ONC0000808	Empesertib	NA	NA	NA	NA	NA	0.64	0.46	0.51	0.31	0.5	0.4	0.537	0.0929	0.403	0.095	2.55e-06	6.37e-05	5.91e-20	1.33e-18	-0.133	0.0787	0.582
ONC0000818	CNQX	Phase 1	glutamate receptor antagonist	GRIA1|GRIA2|GRIA3|GRIA4			1.21	1.08	1.12	1.11	0.99	0.91	1137	0.0666	1003	0.101	0.888	0.995	0.568	0.985	-0.133	0.0695	0.565
ONC0000478	MEGESTROL ACETATE	NA	NA	NA	NA	NA	1.3	1.07	0.99	1	1.04	0.92	1.12	0.161	0.987	0.0611	0.855	0.984	0.466	0.944	-0.133	0.143	0.652
ONC0000443	MICONAZOLE NITRATE	NA	NA	NA	NA	NA	1.18	0.98	1.23	1	0.99	1	1.13	0.132	0.997	0.00577	0.876	0.99	0.528	0.968	-0.133	0.111	0.622
ONC0003293	LINDANE	Launched		GABRB1|GLRA1|GLRA2|GLRA3|GLRB	infectious disease	scabies	0.89	1.06	1.37	0.85	1	1.07	1107	0.243	0.973	0.112	0.823	0.974	0.386	0.893	-0.133	0.228	0.74
ONC0000928	PF-8380	Preclinical	autotaxin inhibitor	ENPP2			1.59	0.92	1.23	1.17	1.12	1.05	1247	0.335	1113	0.0603	0.989	1	0.969	1	-0.133	0.282	0.792
ONC0001796	Vernakalant (Hydrochloride)	NA	NA	NA	NA	NA	0.99	1.06	0.92	1.03	0.83	0.71	0.99	0.07	0.857	0.162	0.423	0.811	0.0184	0.118	-0.133	0.145	0.653
ONC0000945	Otenabant	NA	NA	NA	NA	NA	1.09	0.75	1.14	0.82	1.04	0.72	0.993	0.212	0.86	0.164	0.435	0.817	0.0209	0.132	-0.133	0.22	0.731
ONC0001788	GSK-J1	Preclinical	histone demethylase inhibitor	KDM6B			1.12	1.22	1.01	0.97	1.01	0.97	1117	0.105	0.983	0.0231	0.847	0.98	0.446	0.932	-0.133	0.0768	0.582
ONC0001686	daunorubicin	Launched	RNA synthesis inhibitor|topoisomerase inhibitor	TOP2A|TOP2B	hematologic malignancy	acute myeloid leukemia (AML)|acute lymphoblastic leukemia (ALL)	0.18	0.21	0.41	0.14	0.16	0.1	0.267	0.125	0.133	0.0306	4e-13	2.14e-11	2.94e-40	1.74e-38	-0.133	0.101	0.611
ONC0002170	naringeninic-acid	Phase 1		HCAR2|PTGR1			1.11	0.86	1.1	0.75	1	0.93	1023	0.142	0.893	0.129	0.55	0.868	0.064	0.318	-0.13	0.153	0.664
ONC0004491	FPH1 (BRD-6125)	NA	NA	NA	NA	NA	1.16	1.17	1.22	0.98	1.04	1.14	1183	0.0321	1053	0.0808	0.952	1	0.827	1	-0.13	0.0466	0.497
ONC0003741	nebracetam	Phase 3	acetylcholine receptor agonist	CHRM1			1.54	0.83	1.05	0.98	1.05	1	1.14	0.363	1.01	0.0361	0.894	0.998	0.608	0.997	-0.13	0.3	0.813
ONC0005249	Dactolisib (BEZ235, NVP-BEZ235)	NA	NA	NA	NA	NA	0.43	0.28	0.36	0.2	0.27	0.21	0.357	0.0751	0.227	0.0379	1.54e-10	5.87e-09	2.14e-32	7.39e-31	-0.13	0.0382	0.465
ONC0004141	ambroxol hydrochloride	NA	NA	NA	NA	NA	0.84	1	1.04	0.99	0.57	0.93	0.96	0.106	0.83	0.227	0.314	0.758	0.00624	0.0466	-0.13	0.219	0.729
ONC0004205	PRULIFLOXACIN	Launched	bacterial DNA gyrase inhibitor		infectious disease|pulmonary|gastroenterology	urinary tract infections|bronchitis|diarrhea	1.09	1.27	0.93	0.91	0.96	1.03	1097	0.17	0.967	0.0603	0.797	0.966	0.347	0.857	-0.13	0.158	0.671
ONC0004886	Raltegravir (MK-0518)	NA	NA	NA	NA	NA	0.92	0.95	1.37	1.04	1.09	0.72	1.08	0.252	0.95	0.201	0.749	0.947	0.258	0.761	-0.13	0.262	0.772
ONC0004412	BGJ398 (NVP-BGJ398)	NA	NA	NA	NA	NA	1.09	1.12	1.11	0.95	0.99	0.99	1107	0.0153	0.977	0.0231	0.823	0.974	0.406	0.902	-0.13	0.00112	0.153
ONC0004475	piceatannol	Preclinical	SYK inhibitor	ATP5A1|ATP5B|ATP5C1|IRF3			1.5	1.01	1.19	1.16	1.06	1.09	1233	0.248	1103	0.0513	0.984	1	0.957	1	-0.13	0.231	0.743
ONC0003812	niceritrol	Launched	NAD precursor		endocrinology	hyperlipidemia	1.04	1.19	1.03	0.91	0.87	1.09	1087	0.0896	0.957	0.117	0.769	0.954	0.292	0.806	-0.13	0.103	0.614
ONC0003934	DESLORATIDINE	NA	NA	NA	NA	NA	0.96	1.19	0.91	0.76	0.99	0.92	1.02	0.149	0.89	0.118	0.537	0.863	0.0578	0.295	-0.13	0.153	0.664
ONC0004284	FLUBENDAZOLE	Launched	tubulin polymerization inhibitor	TUBB	infectious disease	gastrointestinal parasites	0.8	0.3	0.59	0.38	0.56	0.36	0.563	0.251	0.433	0.11	8.38e-06	0.000202	3.7e-18	7.6e-17	-0.13	0.238	0.747
ONC0003372	N-Acetyl carnosine	NA	NA	NA	NA	NA	1.01	1	0.99	0.95	1.02	0.64	1	0.01	0.87	0.202	0.461	0.831	0.0299	0.177	-0.13	0.191	0.705
ONC0003059	PSB-06126	Preclinical	NTPDase inhibitor	ENTPD3			1.32	0.99	1.2	1.07	1.02	1.03	1.17	0.167	1.04	0.0265	0.938	1	0.769	1	-0.13	0.155	0.664
ONC0000792	Mibampator	Phase 2	glutamate receptor modulator	GRIA1			0.98	1.16	1.07	1.03	0.73	1.06	1.07	0.09	0.94	0.182	0.717	0.938	0.211	0.681	-0.13	0.176	0.691
ONC0000214	VU29	Preclinical	glutamate receptor potentiator	GRM5			1.12	1	1.22	0.93	0.91	1.11	1113	0.11	0.983	0.11	0.84	0.979	0.446	0.932	-0.13	0.111	0.622
ONC0002723	SGC-707	Preclinical	protein arginine N-methyltransferase inhibitor	PRMT3			0.9	1.2	1.37	1.1	0.99	0.99	1157	0.238	1027	0.0635	0.921	1	0.703	1	-0.13	0.223	0.734
ONC0002406	GADOTERIDOL	Launched	radiopaque medium		radiology	MRI contrast agent	1.27	1.1	1.08	0.92	1	1.14	1.15	0.104	1.02	0.111	0.911	1	0.666	1	-0.13	0.107	0.62
ONC0002223	Oxytocin (acetate)	NA	NA	NA	NA	NA	1.3	1.03	1.11	1.01	1.02	1.02	1147	0.139	1017	0.00577	0.906	1	0.647	1	-0.13	0.123	0.63
ONC0002235	Radezolid	Phase 2	bacterial 30S ribosomal subunit inhibitor|bacterial 50S ribosomal subunit inhibitor				1.22	1.04	0.89	1.01	1	0.75	1.05	0.165	0.92	0.147	0.649	0.915	0.133	0.526	-0.13	0.184	0.703
ONC0000423	BRL-44408	Preclinical	adrenergic receptor antagonist	ADRA2A|ADRA2B|ADRA2C			1.04	1.22	1.12	1.01	0.96	1.02	1127	0.0902	0.997	0.0321	0.869	0.988	0.528	0.968	-0.13	0.0587	0.541
ONC0001404	MI-14	Preclinical	PI4K inhibitor	PI4KB			1.13	1	0.99	0.87	0.9	0.96	1.04	0.0781	0.91	0.0458	0.613	0.897	0.103	0.446	-0.13	0.0414	0.477
ONC0001136	Fenoxaprop-P-ethyl	Preclinical		NOS3			1.25	1.21	1.29	1.05	1.22	1.09	1.25	0.04	1.12	0.0889	0.99	1	0.976	1	-0.13	0.0555	0.532
ONC0000288	Vindesine Sulfate	NA	NA	NA	NA	NA	0.49	0.41	0.22	0.16	0.3	0.27	0.373	0.139	0.243	0.0737	4.28e-10	1.58e-08	4.37e-31	1.41e-29	-0.13	0.123	0.63
ONC0003520	Fluspirilene	Launched	dopamine receptor antagonist	CACNG1|DRD2|HRH1|HTR1A|HTR1D|HTR1E|HTR2A	neurology/psychiatry	schizophrenia	0.95	1.1	0.81	0.86	0.8	0.81	0.953	0.145	0.823	0.0321	0.292	0.741	0.00465	0.0361	-0.13	0.129	0.632
ONC0000175	SUN-11602	Preclinical	fibroblast growth factor mimetic	FGFR1			1.07	0.95	1.14	0.8	1.02	0.95	1053	0.0961	0.923	0.112	0.661	0.916	0.145	0.552	-0.13	0.102	0.614
ONC0001287	T-0156	Preclinical	phosphodiesterase inhibitor	PDE5A			1.68	1.04	0.94	1.07	1.12	1.08	1.22	0.401	1.09	0.0265	0.978	1	0.934	1	-0.13	0.316	0.825
ONC0001520	ABT-724	Phase 2	dopamine receptor agonist	DRD4			1.09	0.91	1.36	0.99	0.94	1.04	1.12	0.226	0.99	0.05	0.855	0.984	0.487	0.945	-0.13	0.213	0.724
ONC0001544	6-chloromelatonin	Preclinical	melatonin receptor agonist	MTNR1A|MTNR1B			0.95	1.25	1.26	1	1.03	1.04	1153	0.176	1023	0.0208	0.916	1	0.684	1	-0.13	0.165	0.682
ONC0005457	ITX3	Preclinical	GEF inhibitor	TRIO			1.28	1.19	1.07	1.08	1.09	0.98	1.18	0.105	1.05	0.0608	0.949	1	0.814	1	-0.13	0.0778	0.582
ONC0001458	TC-F-2	Preclinical	FAAH inhibitor	FAAH			0.96	1	0.99	0.89	0.92	0.75	0.983	0.0208	0.853	0.0907	0.398	0.792	0.0162	0.106	-0.13	0.0624	0.552
ONC0003151	A205804	Preclinical	ICAM1 expression inhibitor	ICAM1|SELE			0.69	0.85	1.13	0.7	0.63	0.95	0.89	0.223	0.76	0.168	0.123	0.519	0.000174	0.00168	-0.13	0.234	0.744
ONC0002748	mepiroxol	Preclinical					0.95	1.01	1.44	1	1.01	1	1133	0.267	1003	0.00577	0.882	0.993	0.568	0.985	-0.13	0.244	0.756
ONC0000489	MESTRANOL	Launched	estrogen receptor agonist	ESR1	endocrinology	contraceptive	1.1	0.96	1.36	1.04	0.96	1.03	1.14	0.203	1.01	0.0436	0.894	0.998	0.608	0.997	-0.13	0.192	0.705
ONC0000501	PROMETHAZINE HYDROCHLORIDE	NA	NA	NA	NA	NA	0.85	1	1.13	0.75	0.84	1	0.993	0.14	0.863	0.127	0.435	0.817	0.0236	0.147	-0.13	0.15	0.661
ONC0003168	SEMUSTINE	Phase 3	DNA alkylating agent				1.09	1.3	1.01	1	0.99	1.02	1133	0.15	1003	0.0153	0.882	0.993	0.568	0.985	-0.13	0.135	0.642
ONC0000013	SD-2590	Preclinical	matrix metalloprotease inhibitor	MMP1|MMP13|MMP2			1.21	1.24	1.09	1.1	1.02	1.03	1.18	0.0794	1.05	0.0436	0.949	1	0.814	1	-0.13	0.0429	0.487
ONC0002049	Verbascoside	Phase 2/Phase 3	NFkB pathway inhibitor|PKC inhibitor				1.27	1.19	0.74	0.87	0.98	0.96	1067	0.286	0.937	0.0586	0.707	0.935	0.196	0.658	-0.13	0.258	0.766
ONC0000925	McN-5652-(+/-)	Preclinical	selective serotonin reuptake inhibitor (SSRI)				1.05	0.96	1.31	1	1	0.93	1107	0.182	0.977	0.0404	0.823	0.974	0.406	0.902	-0.13	0.17	0.687
ONC0001903	(3?,5?)-3-Hydroxy-pregnan-20-one	NA	NA	NA	NA	NA	0.99	1.05	1.08	0.99	0.78	0.96	1.04	0.0458	0.91	0.114	0.613	0.897	0.103	0.446	-0.13	0.088	0.597
ONC0000943	VCH-916	Phase 1	HCV inhibitor				1.19	0.86	1.1	0.88	1	0.88	1.05	0.171	0.92	0.0693	0.649	0.915	0.133	0.526	-0.13	0.16	0.674
ONC0002988	desoxycorticosterone-pivalate	Launched	corticosteroid agonist	NR3C2	endocrinology	Addison's disease	1.12	1	1.27	0.97	1.01	1.02	1.13	0.135	1	0.0265	0.876	0.99	0.548	0.978	-0.13	0.118	0.63
ONC0002132	levomenol	Launched			neurology/psychiatry|infectious disease	spasms|skin infections	1.04	0.81	1.46	0.99	1.06	0.88	1103	0.33	0.977	0.0907	0.815	0.972	0.406	0.902	-0.127	0.29	0.803
ONC0004694	Ku-0063794	Preclinical	mTOR inhibitor	MTOR			1.11	0.93	1.03	0.7	1.01	0.98	1023	0.0902	0.897	0.171	0.55	0.868	0.0706	0.343	-0.127	0.169	0.687
ONC0004714	STF-62247	Preclinical	autophagy inducer				0.98	0.93	1.22	0.94	0.85	0.96	1043	0.155	0.917	0.0586	0.625	0.903	0.122	0.499	-0.127	0.146	0.653
ONC0004825	PR-619	Preclinical	DUB inhibitor				0.77	1.43	1.01	0.88	0.99	0.96	1.07	0.334	0.943	0.0569	0.717	0.938	0.226	0.711	-0.127	0.29	0.803
ONC0004556	I-BET151 (GSK1210151A)	NA	NA	NA	NA	NA	0.25	0.18	0.45	0.1	0.09	0.31	0.293	0.14	0.167	0.124	2.52e-12	1.23e-10	2.39e-37	1.12e-35	-0.127	0.154	0.664
ONC0005196	Silymarin (Silybin B)	NA	NA	NA	NA	NA	0.9	1.03	0.96	0.84	0.78	0.89	0.963	0.0651	0.837	0.0551	0.326	0.763	0.0083	0.0596	-0.127	0.0317	0.422
ONC0004512	Ibuprofen Lysine (NeoProfen)	NA	NA	NA	NA	NA	1.11	1.37	1.24	1.13	1.18	1.03	1.24	0.13	1113	0.0764	0.987	1	0.969	1	-0.127	0.118	0.63
ONC0003600	immethridine	Phase 1	histamine receptor agonist	HRH3			1.34	1.04	1.01	1.14	0.99	0.88	1.13	0.182	1003	0.131	0.876	0.99	0.568	0.985	-0.127	0.194	0.706
ONC0004844	CUDC-101	Phase 1	EGFR inhibitor	EGFR|ERBB2			0.77	1.29	1.3	0.97	0.98	1.03	1.12	0.303	0.993	0.0321	0.855	0.984	0.507	0.957	-0.127	0.273	0.781
ONC0003981	BECLAMIDE	Launched	anticonvulsant		neurology/psychiatry	sedative|seizures	1.12	1	1.32	1.13	0.97	0.96	1147	0.162	1.02	0.0954	0.906	1	0.666	1	-0.127	0.161	0.674
ONC0005028	LB42708	Preclinical	farnesyltransferase inhibitor				0.53	0.57	0.78	0.66	0.41	0.43	0.627	0.134	0.5	0.139	0.00011	0.00223	1.71e-14	3e-13	-0.127	0.16	0.674
ONC0005188	AGI-5198	Preclinical	isocitrate dehydrogenase inhibitor	IDH1			1	1.38	1.05	0.99	0.99	1.07	1143	0.206	1017	0.0462	0.9	0.998	0.647	1	-0.127	0.2	0.71
ONC0003688	2',3',5'-Tri-O-acetyluridine	NA	NA	NA	NA	NA	1.04	0.82	1.2	1.03	1.12	0.53	1.02	0.191	0.893	0.318	0.537	0.863	0.064	0.318	-0.127	0.296	0.81
ONC0004225	EFLOXATE	Preclinical	vasodilator				0.82	0.98	0.93	0.97	0.78	0.6	0.91	0.0819	0.783	0.185	0.167	0.597	0.000648	0.00581	-0.127	0.182	0.701
ONC0002873	PRILOCAINE HYDROCHLORIDE	NA	NA	NA	NA	NA	1.08	1.37	0.97	1.01	1	1.03	1.14	0.207	1013	0.0153	0.894	0.998	0.628	1	-0.127	0.2	0.71
ONC0003013	SB-221284	Preclinical	serotonin receptor antagonist	HTR2A|HTR2B|HTR2C			0.98	1.05	1.32	0.95	1.05	0.97	1117	0.18	0.99	0.0529	0.847	0.98	0.487	0.945	-0.127	0.173	0.689
ONC0000618	TRAMIPROSATE	Phase 3	beta amyloid protein neurotoxicity inhibitor	APP			1.01	1.06	1.22	0.77	1.13	1.01	1097	0.11	0.97	0.183	0.797	0.966	0.366	0.877	-0.127	0.187	0.705
ONC0000738	ESTRADIOL CYPIONATE	NA	NA	NA	NA	NA	0.98	0.99	1.29	1.04	0.9	0.94	1087	0.176	0.96	0.0721	0.769	0.954	0.31	0.826	-0.127	0.171	0.687
ONC0002261	Ro 61-8048	NA	NA	NA	NA	NA	1.21	1.2	1	1.01	1.04	0.98	1137	0.118	1.01	0.03	0.888	0.995	0.608	0.997	-0.127	0.1	0.611
ONC0001406	PK-THPP	Preclinical	potassium channel blocker	KCNK9			1.04	0.99	1.23	0.81	1.1	0.97	1087	0.127	0.96	0.145	0.769	0.954	0.31	0.826	-0.127	0.16	0.674
ONC0000305	CHLORTHALIDONE	Launched	carbonic anhydrase inhibitor	CA1|CA12|CA14|CA2|CA4|CA7|SLC12A1	cardiology|gastroenterology|rheumatology|nephrology	hypertension|edema|congestive heart failure|hepatic cirrhosis|nephrotic syndrome|acute glomerulonephritis (AGN)|chronic renal failure	0.88	0.97	1.09	0.73	0.95	0.88	0.98	0.105	0.853	0.112	0.385	0.789	0.0162	0.106	-0.127	0.114	0.625
ONC0001266	Lorediplon	Phase 2	GABA receptor modulator	GABRA1			1.36	1.06	1.02	1.06	1.01	0.99	1147	0.186	1.02	0.0361	0.906	1	0.666	1	-0.127	0.179	0.695
ONC0005596	1-O-Octadecyl-2-O-methyl-sn-glycero-3-phosphorylcholine	NA	NA	NA	NA	NA	0.81	0.95	1.19	0.97	0.93	0.67	0.983	0.192	0.857	0.163	0.398	0.792	0.0184	0.118	-0.127	0.217	0.727
ONC0005536	pozanicline	Phase 2	acetylcholine receptor antagonist	CHRNA4|CHRNB2			1.19	1.16	0.9	0.83	0.95	1.09	1083	0.159	0.957	0.13	0.759	0.95	0.292	0.806	-0.127	0.174	0.689
ONC0002067	Gambogic Acid	NA	NA	NA	NA	NA	1.22	0.81	0.68	0.72	0.76	0.85	0.903	0.282	0.777	0.0666	0.152	0.577	0.000451	0.00413	-0.127	0.26	0.769
ONC0000053	GSK-0660	Preclinical	PPAR receptor antagonist	PPARD			1.1	1.13	1.16	0.99	0.99	1.03	1.13	0.03	1003	0.0231	0.876	0.99	0.568	0.985	-0.127	0.00267	0.191
ONC0002092	Eluxadoline	Launched	opioid receptor agonist|opioid receptor antagonist	OPRD1|OPRK1|OPRM1	gastroenterology	irritable bowel syndrome	1.1	1.02	1.19	0.87	1.12	0.94	1103	0.085	0.977	0.129	0.815	0.972	0.406	0.902	-0.127	0.12	0.63
ONC0000921	LY2979165	Phase 1	glutamate receptor agonist	GRM2			1.09	1.09	1.13	0.98	0.86	1.09	1103	0.0231	0.977	0.115	0.815	0.972	0.406	0.902	-0.127	0.0964	0.611
ONC0002169	Bentamapimod	NA	NA	NA	NA	NA	1.08	0.79	1	0.83	0.89	0.78	0.957	0.15	0.833	0.0551	0.303	0.751	0.00721	0.0527	-0.123	0.144	0.653
ONC0003532	diazepam	NA	NA	NA	NA	NA	1.21	0.92	1	0.97	0.8	0.99	1043	0.15	0.92	0.104	0.625	0.903	0.133	0.526	-0.123	0.157	0.669
ONC0004851	Acitretin	Launched	retinoid receptor agonist	RARA|RARB|RARG|RBP1|RXRA|RXRB|RXRG|STAT3	dermatology	psoriasis	1.22	1.25	1.47	1.2	1.2	1.17	1313	0.137	1.19	0.0173	0.998	1	0.999	1	-0.123	0.128	0.632
ONC0004864	Bimatoprost	Launched	prostanoid receptor agonist	AKR1C3|PTGER1|PTGER3|PTGFR	ophthalmology	intraocular pressure|glaucoma|ocular hypertension	1.22	1	1.22	1.02	1.11	0.94	1147	0.127	1023	0.085	0.906	1	0.684	1	-0.123	0.122	0.63
ONC0005164	MPI-0479605	Preclinical	mitotic kinase inhibitor	TTK			0.65	0.8	0.7	0.69	0.61	0.48	0.717	0.0764	0.593	0.106	0.00235	0.0329	4.03e-10	5.97e-09	-0.123	0.0922	0.606
ONC0003863	rosamicin	Phase 2	protein synthesis inhibitor				1.16	1.12	0.9	1.01	0.91	0.89	1.06	0.14	0.937	0.0643	0.684	0.925	0.196	0.658	-0.123	0.133	0.637
ONC0003659	(2,2-Dichloro-1,1-difluoroethyl) methyl ether	NA	NA	NA	NA	NA	1.14	1.23	0.98	1.02	0.9	1.06	1117	0.127	0.993	0.0833	0.847	0.98	0.507	0.957	-0.123	0.121	0.63
ONC0003430	Solvent Red 24	NA	NA	NA	NA	NA	0.88	1.32	1.1	0.94	0.84	1.15	1.1	0.22	0.977	0.158	0.806	0.968	0.406	0.902	-0.123	0.239	0.748
ONC0000356	MOXALACTAM DISODIUM	NA	NA	NA	NA	NA	1.03	1.15	1.01	0.87	0.86	1.09	1063	0.0757	0.94	0.13	0.695	0.93	0.211	0.681	-0.123	0.122	0.63
ONC0001475	purvalanol-a	Preclinical	CDK inhibitor	CDK1|CDK2|CDK4|CDK5|CSNK1G3|RPS6KA1|SRC			1.23	0.89	0.95	0.97	0.81	0.92	1023	0.181	0.9	0.0819	0.55	0.868	0.0779	0.368	-0.123	0.184	0.703
ONC0002333	KETOROLAC TROMETHAMINE	NA	NA	NA	NA	NA	1.16	1.09	1.03	1.01	0.95	0.95	1093	0.0651	0.97	0.0346	0.788	0.963	0.366	0.877	-0.123	0.0307	0.418
ONC0001521	3,4-DCPG-(R)	Preclinical	glutamate receptor antagonist				1.03	1.03	0.96	0.72	0.96	0.97	1007	0.0404	0.883	0.142	0.486	0.843	0.0468	0.252	-0.123	0.134	0.639
ONC0002732	2-(2,5-Dioxopyrrolidin-1-Yl)Ethyl Methyl Fumarate	NA	NA	NA	NA	NA	1.11	0.99	1.33	0.98	1	1.08	1143	0.172	1.02	0.0529	0.9	0.998	0.666	1	-0.123	0.171	0.687
ONC0000823	L-798,106	Preclinical	prostanoid receptor antagonist	PTGER3			1.22	0.95	1.24	1.07	0.95	1.02	1137	0.162	1013	0.0603	0.888	0.995	0.628	1	-0.123	0.159	0.672
ONC0000830	Cinaciguat	Phase 2	guanylate cyclase activator	GUCY1A3|GUCY1B3			1.01	0.97	1.48	1	0.98	1.11	1153	0.284	1.03	0.07	0.916	1	0.72	1	-0.123	0.267	0.774
ONC0002783	Colistin (sulfate)	NA	NA	NA	NA	NA	1.15	1.29	1.12	1.04	1.07	1.08	1187	0.0907	1063	0.0208	0.955	1	0.864	1	-0.123	0.0683	0.565
ONC0002070	Telaglenastat	NA	NA	NA	NA	NA	0.39	0.43	0.46	0.3	0.29	0.32	0.427	0.0351	0.303	0.0153	9.53e-09	3.03e-07	1.32e-26	3.58e-25	-0.123	0.00727	0.282
ONC0001026	SB1317	NA	NA	NA	NA	NA	0.17	0.33	0.42	0.15	0.2	0.2	0.307	0.127	0.183	0.0289	6.17e-12	2.83e-10	6.18e-36	2.62e-34	-0.123	0.115	0.628
ONC0000976	XL228	Phase 1	Abl kinase inhibitor|insulin growth factor receptor inhibitor|SRC inhibitor	IGF1R|SRC			0.53	0.62	0.59	0.43	0.46	0.48	0.58	0.0458	0.457	0.0252	1.71e-05	0.000393	7.98e-17	1.55e-15	-0.123	0.0124	0.318
ONC0001832	MK-5046	Preclinical	bombesin receptor agonist	BRS3|GRPR|NMBR			1.04	0.92	1.05	0.78	0.99	0.87	1003	0.0723	0.88	0.105	0.473	0.837	0.042	0.232	-0.123	0.0895	0.602
ONC0001162	Glasdegib	Launched	hedgehog pathway inhibitor	SMO	hematologic malignancy	acute myeloid leukemia (AML)	1	1.14	1	0.8	0.99	0.98	1047	0.0808	0.923	0.107	0.637	0.909	0.145	0.552	-0.123	0.0957	0.61
ONC0002925	Tocainide	Launched	sodium channel blocker	SCN5A	cardiology	cardiac arrythmia	1.14	0.89	1.23	0.91	1	0.98	1087	0.176	0.963	0.0473	0.769	0.954	0.329	0.839	-0.123	0.175	0.689
ONC0002193	clobetasone-butyrate	Launched	corticosteroid agonist	NR3C1	dermatology	eczema|psoriasis|dermatitis	0.96	0.86	0.97	0.67	0.97	0.79	0.93	0.0608	0.81	0.151	0.22	0.682	0.00251	0.0205	-0.12	0.151	0.664
ONC0004192	OXALIPLATIN	Launched	DNA inhibitor		oncology	colorectal cancer	1.2	1.13	1	0.98	0.99	1	1.11	0.101	0.99	0.01	0.832	0.975	0.487	0.945	-0.12	0.088	0.597
ONC0004223	LOBENDAZOLE	Preclinical	anthelmintic agent				0.99	1.17	1.12	1.05	0.76	1.11	1093	0.0929	0.973	0.187	0.788	0.963	0.386	0.893	-0.12	0.197	0.708
ONC0003548	LY303511	Preclinical	casein kinase inhibitor|mTOR inhibitor|PI3K inhibitor	BRD2|BRD3|BRD4			0.95	0.89	0.96	0.77	0.73	0.94	0.933	0.0379	0.813	0.112	0.229	0.688	0.00294	0.0238	-0.12	0.0979	0.611
ONC0003565	piricapiron	Phase 2	dopamine receptor antagonist|serotonin receptor antagonist	HTR2A			0.85	1.02	1.01	0.78	0.86	0.88	0.96	0.0954	0.84	0.0529	0.314	0.758	0.00954	0.0666	-0.12	0.0746	0.58
ONC0004005	AMLODIPINE BESYLATE	NA	NA	NA	NA	NA	0.72	1.27	1.04	0.98	0.74	0.95	1.01	0.276	0.89	0.131	0.499	0.851	0.0578	0.295	-0.12	0.274	0.783
ONC0004011	ARSENIC TRIOXIDE DIETHANOLAMINE SALT	NA	NA	NA	NA	NA	0.98	1.12	1.06	0.9	0.97	0.93	1053	0.0702	0.933	0.0351	0.661	0.916	0.182	0.63	-0.12	0.0394	0.471
ONC0004416	Telbivudine (Sebivo, Tyzeka)	NA	NA	NA	NA	NA	0.81	1.15	1.12	0.99	0.67	1.06	1027	0.188	0.907	0.208	0.563	0.874	0.0939	0.419	-0.12	0.25	0.76
ONC0003852	IODIPAMIDE	Launched	radiopaque medium	ALB	radiology	contrast agent	1.12	1	1.06	1.09	0.83	0.9	1.06	0.06	0.94	0.135	0.684	0.925	0.211	0.681	-0.12	0.13	0.633
ONC0002468	ICA-110381	Preclinical	voltage-gated potassium channel activator	KCNQ2			1.01	1.24	1.05	0.96	1.15	0.83	1.1	0.123	0.98	0.161	0.806	0.968	0.426	0.919	-0.12	0.183	0.702
ONC0003913	RIMANTADINE HYDROCHLORIDE	NA	NA	NA	NA	NA	0.92	1.18	1.16	1	0.99	0.91	1087	0.145	0.967	0.0493	0.769	0.954	0.347	0.857	-0.12	0.143	0.652
ONC0003936	OSELTAMIVIR PHOSPHATE	NA	NA	NA	NA	NA	1.02	1.28	1.05	1.04	1.01	0.94	1117	0.142	0.997	0.0513	0.847	0.98	0.528	0.968	-0.12	0.14	0.649
ONC0002881	Mebicar	Launched	anxiolytic		neurology/psychiatry	anxiety	0.97	1.21	1.03	0.99	0.8	1.06	1.07	0.125	0.95	0.135	0.717	0.938	0.258	0.761	-0.12	0.161	0.674
ONC0000770	PAP-1	NA	NA	NA	NA	NA	1.07	0.88	0.98	0.59	0.98	1	0.977	0.095	0.857	0.231	0.373	0.785	0.0184	0.118	-0.12	0.237	0.747
ONC0002580	N-alpha-Methylhistamine-dihydrochloride	Phase 3	histamine receptor agonist	HRH4			1.16	1.1	1.15	0.98	1	1.07	1137	0.0321	1017	0.0473	0.888	0.995	0.647	1	-0.12	0.0137	0.326
ONC0000392	IMIPRAMINE HYDROCHLORIDE	NA	NA	NA	NA	NA	0.95	0.99	1.02	0.88	0.86	0.86	0.987	0.0351	0.867	0.0115	0.41	0.805	0.0266	0.161	-0.12	0.00958	0.295
ONC0000397	Dimethylcurcumin, ASC-J9	NA	NA	NA	NA	NA	1.02	0.99	0.8	0.8	0.87	0.78	0.937	0.119	0.817	0.0473	0.239	0.699	0.00343	0.0276	-0.12	0.108	0.621
ONC0001608	3-MPPI	Preclinical	adrenergic receptor ligand	ADRA1A			1.06	1.03	1.16	1.01	0.89	0.99	1083	0.0681	0.963	0.0643	0.759	0.95	0.329	0.839	-0.12	0.0454	0.497
ONC0000826	Altiratinib	Phase 1	MET inhibitor|VEGFR inhibitor	KDR|MET|TEK			1.05	1	0.96	0.76	1	0.89	1003	0.0451	0.883	0.12	0.473	0.837	0.0468	0.252	-0.12	0.11	0.622
ONC0003197	DIETHYLSTILBESTROL	Withdrawn	estrogen receptor agonist	ESR1|ESR2|ESRRB|ESRRG			0.94	1.11	0.99	1.03	0.87	0.78	1013	0.0874	0.893	0.127	0.512	0.856	0.064	0.318	-0.12	0.128	0.632
ONC0003109	co-102862	Phase 1	sodium channel blocker	SCN4A|SCN9A			0.87	1.13	1.38	1.03	0.99	1	1127	0.255	1007	0.0208	0.869	0.988	0.588	0.993	-0.12	0.25	0.76
ONC0005405	REPAGLINIDE	Launched	insulin secretagogue	ABCC8|KCNJ11|PPARG	endocrinology	diabetes mellitus	1	1.12	1.37	0.93	1.06	1.14	1163	0.189	1043	0.106	0.93	1	0.785	1	-0.12	0.202	0.71
ONC0002180	Hycanthone	Launched	RNA synthesis inhibitor		infectious disease	schistosomiasis	1.1	0.96	0.59	0.76	0.92	0.62	0.883	0.264	0.767	0.15	0.111	0.491	0.000257	0.00241	-0.117	0.275	0.785
ONC0004495	ML130	Preclinical	NOD1 inhibitor				0.98	1.1	1.18	0.9	0.97	1.04	1087	0.101	0.97	0.07	0.769	0.954	0.366	0.877	-0.117	0.0916	0.606
ONC0005062	PF-3845	Preclinical	FAAH inhibitor	FAAH			1.09	0.94	1.08	0.89	0.97	0.9	1037	0.0839	0.92	0.0436	0.6	0.889	0.133	0.526	-0.117	0.0609	0.547
ONC0004913	LDE225 (NVP-LDE225, Erismodegib)	NA	NA	NA	NA	NA	0.83	1.2	1.07	0.91	0.97	0.87	1033	0.188	0.917	0.0503	0.588	0.885	0.122	0.499	-0.117	0.198	0.708
ONC0004599	Foretinib (GSK1363089, XL880)	NA	NA	NA	NA	NA	0.6	0.68	0.61	0.43	0.43	0.68	0.63	0.0436	0.513	0.144	0.000125	0.0025	8.14e-14	1.39e-12	-0.117	0.147	0.654
ONC0004431	AZD3988	Preclinical	diacylglycerol kinase inhibitor	DGAT1			1.27	0.93	0.76	0.95	0.88	0.78	0.987	0.26	0.87	0.0854	0.41	0.805	0.0299	0.177	-0.117	0.262	0.772
ONC0004630	Ixazomib Citrate (MLN9708)	NA	NA	NA	NA	NA	0.15	-0.02	0.16	-0.03	0.01	-0.04	0.097	0.101	-0.02	0.0265	6.93e-19	8.67e-17	4.11e-55	1.16e-52	-0.117	0.0888	0.599
ONC0004430	Y-26763	Phase 1	potassium channel activator	KCNJ8			1.09	0.97	1.17	0.79	1.06	1.03	1077	0.101	0.96	0.148	0.739	0.947	0.31	0.826	-0.117	0.165	0.683
ONC0004997	Emodin	Preclinical	11-beta hydroxysteroid dehydrogenase inhibitor	CSNK2A1			1.12	0.94	1.16	1	0.95	0.92	1073	0.117	0.957	0.0404	0.728	0.942	0.292	0.806	-0.117	0.11	0.622
ONC0002825	NA	NA	NA	NA	NA	NA	1.31	1.04	0.95	1.18	0.75	1.02	1.1	0.187	0.983	0.217	0.806	0.968	0.446	0.932	-0.117	0.26	0.769
ONC0000200	impentamine	Preclinical	histamine receptor antagonist	HRH3			1.35	0.91	1.23	1.13	0.93	1.08	1163	0.227	1047	0.104	0.93	1	0.799	1	-0.117	0.241	0.75
ONC0000204	MY-5445	Preclinical	phosphodiesterase inhibitor|platelet aggregation inhibitor	PDE5A			0.98	0.98	0.99	0.75	0.85	1	0.983	0.00577	0.867	0.126	0.398	0.792	0.0266	0.161	-0.117	0.125	0.632
ONC0000720	cardiogenol-c	Preclinical	cardiomyogenesis inducer				1.07	0.79	1.03	1.08	0.3	1.16	0.963	0.151	0.847	0.475	0.326	0.763	0.0125	0.0846	-0.117	0.359	0.85
ONC0000229	PF-750	Preclinical	FAAH inhibitor	FAAH			1.04	0.99	0.98	0.84	0.91	0.91	1003	0.0321	0.887	0.0404	0.473	0.837	0.0521	0.274	-0.117	0.00953	0.295
ONC0002675	cyanopindolol	Phase 2	adrenergic receptor antagonist	ADRB1|HTR1A|HTR1D			1.21	0.95	1	0.88	0.87	1.06	1053	0.138	0.937	0.107	0.661	0.916	0.196	0.658	-0.117	0.158	0.669
ONC0002280	Bacitracin (Zinc)	NA	NA	NA	NA	NA	1.01	1.36	1.1	1.02	1.13	0.97	1157	0.182	1.04	0.0819	0.921	1	0.769	1	-0.117	0.195	0.706
ONC0001093	Ticarcillin (disodium)	NA	NA	NA	NA	NA	1.07	1.17	0.92	0.96	0.81	1.04	1053	0.126	0.937	0.117	0.661	0.916	0.196	0.658	-0.117	0.152	0.664
ONC0001348	PD-98059	Preclinical	MEK inhibitor	AKT1|CHEK1|GSK3B|LCK|MAP2K1|MAPK1|MAPK11|MAPK12|MAPK14|MAPK8|PRKCA|RAF1|ROCK1|RPS6KB1|SGK1			1.16	0.95	1.12	0.9	0.97	1.01	1077	0.112	0.96	0.0557	0.739	0.947	0.31	0.826	-0.117	0.103	0.614
ONC0001368	Dofequidar (fumarate)	NA	NA	NA	NA	NA	1.03	1.21	1.31	1.01	0.99	1.2	1183	0.142	1067	0.116	0.952	1	0.874	1	-0.117	0.167	0.685
ONC0001616	ACDPP	Preclinical	glutamate receptor antagonist	GRM5			1.16	1.26	1.12	1.14	1	1.05	1.18	0.0721	1063	0.0709	0.949	1	0.864	1	-0.117	0.0582	0.541
ONC0001533	SKF-81297	Preclinical	dopamine receptor agonist	DRD1|DRD5			1.06	1.3	1	1	0.99	1.02	1.12	0.159	1003	0.0153	0.855	0.984	0.568	0.985	-0.117	0.165	0.683
ONC0002789	NA	NA	NA	NA	NA	NA	1.2	0.59	0.89	0.64	0.93	0.76	0.893	0.305	0.777	0.146	0.13	0.532	0.000451	0.00413	-0.117	0.297	0.811
ONC0000811	ozagrel	Launched	thromboxane synthase inhibitor	TBXAS1	neurology/psychiatry	stroke	0.9	1.35	1.14	1.02	1.02	1	1.13	0.225	1013	0.0115	0.876	0.99	0.628	1	-0.117	0.232	0.744
ONC0003105	IKK-2-inhibitor-V	Phase 1	IKK inhibitor|NFkB pathway inhibitor	IKBKB			1.35	0.94	0.55	0.87	0.78	0.84	0.947	0.4	0.83	0.0458	0.27	0.728	0.00624	0.0466	-0.117	0.332	0.839
ONC0000508	METHIMAZOLE	Launched	antithyroid agent	TPO	endocrinology	hyperthyroidism	1.04	1.28	1.05	1.13	0.87	1.02	1123	0.136	1007	0.131	0.862	0.986	0.588	0.993	-0.117	0.172	0.687
ONC0003147	aniracetam	Launched	glutamate receptor agonist	DRD2|GRIA1|GRIA2|GRIA3|GRIA4|HTR2A			1.06	1	1.09	0.7	1.07	1.03	1.05	0.0458	0.933	0.203	0.649	0.915	0.182	0.63	-0.117	0.213	0.724
ONC0000077	R-59022	Preclinical	diacylglycerol kinase inhibitor|protein kinase inhibitor	DGKA			0.88	0.78	1.44	0.79	0.98	0.98	1033	0.356	0.917	0.11	0.588	0.885	0.122	0.499	-0.117	0.317	0.826
ONC0000055	rosmarinic-acid	Launched	GABA transaminase inhibitor	MCL1|TYR			1.11	0.95	0.96	0.9	1.07	0.7	1007	0.0896	0.89	0.185	0.486	0.843	0.0578	0.295	-0.117	0.2	0.71
ONC0000938	Necrostatin 2	NA	NA	NA	NA	NA	1.34	0.98	0.95	0.88	0.98	1.06	1.09	0.217	0.973	0.0902	0.779	0.959	0.386	0.893	-0.117	0.23	0.742
ONC0005281	MEXENEONE	Preclinical					0.93	1.06	1.39	0.97	1.01	1.05	1127	0.237	1.01	0.04	0.869	0.988	0.608	0.997	-0.117	0.243	0.754
ONC0002018	Bopindolol malonate	NA	NA	NA	NA	NA	1.2	1	0.8	0.75	0.94	0.96	1	0.2	0.883	0.116	0.461	0.831	0.0468	0.252	-0.117	0.221	0.732
ONC0001776	NSI-189	Phase 2	neurotrophic agent				1.06	1.15	0.99	0.97	0.97	0.91	1067	0.0802	0.95	0.0346	0.707	0.935	0.258	0.761	-0.117	0.0564	0.537
ONC0005293	IMEXON	Phase 2	apoptosis stimulant|ribonucleotide reductase inhibitor				1.26	1.11	0.87	0.75	1.11	1.03	1.08	0.197	0.963	0.189	0.749	0.947	0.329	0.839	-0.117	0.25	0.76
ONC0001836	Rotigotine	Launched	dopamine receptor agonist	ADRA2B|DRD1|DRD2|DRD3|DRD4|DRD5|HTR1A	neurology/psychiatry	Parkinson's Disease|restless leg syndrome	1	1.01	0.99	0.9	0.99	0.76	1	0.01	0.883	0.116	0.461	0.831	0.0468	0.252	-0.117	0.111	0.622
ONC0004735	Sodium Nitrite	NA	NA	NA	NA	NA	1.31	0.93	1.34	1.15	0.99	1.1	1193	0.229	1.08	0.0819	0.961	1	0.912	1	-0.113	0.244	0.756
ONC0002197	afimoxifene	Phase 2	estrogen receptor antagonist	ESR1|ESR2|ESRRG|PLD1|PRKCD|PRKCE|PRKCQ|PRKCZ			1.05	1.06	0.87	0.98	0.79	0.87	0.993	0.107	0.88	0.0954	0.435	0.817	0.042	0.232	-0.113	0.122	0.63
ONC0004756	Turofexorate Isopropyl (XL335)	NA	NA	NA	NA	NA	0.86	1.33	1.09	0.89	1.09	0.96	1093	0.235	0.98	0.101	0.788	0.963	0.426	0.919	-0.113	0.252	0.76
ONC0004731	Genipin	Preclinical	choleretic agent				1.28	0.93	0.83	0.82	1	0.88	1013	0.236	0.9	0.0917	0.512	0.856	0.0779	0.368	-0.113	0.252	0.76
ONC0003523	L-690330	Preclinical	inositol monophosphatase inhibitor	IMPA1			1.24	0.99	1.14	1.19	1.08	0.76	1123	0.126	1.01	0.223	0.862	0.986	0.608	0.997	-0.113	0.249	0.76
ONC0003707	Icatibant	NA	NA	NA	NA	NA	1.05	1.12	0.97	1.02	0.88	0.9	1047	0.0751	0.933	0.0757	0.637	0.909	0.182	0.63	-0.113	0.0697	0.565
ONC0003739	bonaphthone	Phase 3					1.04	0.81	1.05	0.94	0.73	0.89	0.967	0.136	0.853	0.11	0.337	0.769	0.0162	0.106	-0.113	0.163	0.681
ONC0003729	valrocemide	Phase 2					1.42	1.12	1	1.01	1.11	1.08	1.18	0.216	1067	0.0513	0.949	1	0.874	1	-0.113	0.231	0.743
ONC0004035	FURALTADONE	Launched	bacterial DNA inhibitor		infectious disease	gram-negative bacterial infections	1	0.89	1.29	0.97	1.02	0.85	1.06	0.207	0.947	0.0874	0.684	0.925	0.242	0.735	-0.113	0.226	0.737
ONC0004919	AICAR (Acadesine)	NA	NA	NA	NA	NA	0.97	1.37	0.93	0.99	0.97	0.97	1.09	0.243	0.977	0.0115	0.779	0.959	0.406	0.902	-0.113	0.252	0.76
ONC0005060	Ilomastat (GM6001, Galardin)	NA	NA	NA	NA	NA	1.28	1.27	0.97	1.11	0.77	1.3	1173	0.176	1.06	0.269	0.942	1	0.852	1	-0.113	0.289	0.803
ONC0004633	Pancuronium dibromide	NA	NA	NA	NA	NA	1.15	1.33	0.97	0.98	1.03	1.1	1.15	0.18	1037	0.0603	0.911	1	0.754	1	-0.113	0.196	0.706
ONC0002519	DCPIB	Preclinical	chloride channel blocker|gap junction modulator|glutamate inhibitor	SLC1A2			1.16	1.2	0.95	0.97	0.97	1.03	1103	0.134	0.99	0.0346	0.815	0.972	0.487	0.945	-0.113	0.139	0.649
ONC0002819	AMSACRINE	Launched	topoisomerase inhibitor	KCNH2|TOP2A	hematologic malignancy	acute lymphoblastic leukemia (ALL)	0.33	0.27	0.23	0.27	0.15	0.07	0.277	0.0503	0.163	0.101	8.03e-13	4.15e-11	1.24e-37	6.06e-36	-0.113	0.0907	0.605
ONC0003074	SPP-86	Preclinical	receptor tyrosine protein kinase inhibitor	RET			0.6	1.47	1.22	0.97	0.99	0.99	1097	0.448	0.983	0.0115	0.797	0.966	0.446	0.932	-0.113	0.352	0.85
ONC0000680	DIPHENHYDRAMINE HYDROCHLORIDE	NA	NA	NA	NA	NA	1.09	0.94	0.85	0.86	0.68	1	0.96	0.121	0.847	0.16	0.314	0.758	0.0125	0.0846	-0.113	0.194	0.706
ONC0002701	JNJ-27141491	Preclinical	CC chemokine receptor antagonist	CCR2			1.22	1.33	1.07	1	1.15	1.13	1207	0.131	1093	0.0814	0.971	1	0.94	1	-0.113	0.142	0.652
ONC0000255	CYM-5541	Preclinical	sphingosine 1-phosphate receptor agonist	S1PR3			1.17	1.14	1.01	0.96	1.03	0.99	1107	0.085	0.993	0.0351	0.823	0.974	0.507	0.957	-0.113	0.067	0.565
ONC0000264	trans-4-Hydroxycrotonic-acid	Preclinical	gamma hydroxybutyric acid ligand				1.1	1.42	1.1	1.1	1.04	1.14	1207	0.185	1093	0.0503	0.971	1	0.94	1	-0.113	0.201	0.71
ONC0000778	RO4987655	Phase 1	MEK inhibitor	MAP2K1			0.99	0.87	0.81	0.64	0.89	0.8	0.89	0.0917	0.777	0.127	0.123	0.519	0.000451	0.00413	-0.113	0.142	0.652
ONC0002240	SHP099 (hydrochloride)	NA	NA	NA	NA	NA	0.91	0.8	1.38	0.61	1	1.14	1.03	0.308	0.917	0.275	0.575	0.879	0.122	0.499	-0.113	0.33	0.838
ONC0002693	chromanol-293B-(-)-[3R,4S]	Preclinical	potassium channel blocker				1.19	1.08	0.97	0.98	0.96	0.96	1.08	0.11	0.967	0.0115	0.749	0.947	0.347	0.857	-0.113	0.108	0.621
ONC0000367	MINOXIDIL	Launched	KATP activator|Kir6 channel (KATP) activator|vasodilator	ABCC9|KCNJ1|KCNJ10|KCNJ11|KCNJ8|PTGS1	endocrinology	androgenetic alopecia	1.05	1.04	1.09	0.87	0.92	1.05	1.06	0.0265	0.947	0.0929	0.684	0.925	0.242	0.735	-0.113	0.0806	0.584
ONC0001074	Azimilide (Dihydrochloride)	NA	NA	NA	NA	NA	0.9	1.1	1.2	0.89	1.07	0.9	1067	0.153	0.953	0.101	0.707	0.935	0.275	0.784	-0.113	0.176	0.692
ONC0000090	CR8-(R)	Preclinical	CDK inhibitor	CCNA2			-0.06	0.07	0.39	0.23	-0.04	-0.13	0.133	0.232	0.02	0.187	1.51e-17	1.52e-15	5.27e-51	8.48e-49	-0.113	0.274	0.783
ONC0000310	Vinflunine Ditartrate	NA	NA	NA	NA	NA	0.4	0.41	0.13	0.12	0.28	0.2	0.313	0.159	0.2	0.08	9.61e-12	4.26e-10	1.5e-34	5.93e-33	-0.113	0.176	0.691
ONC0001311	LXR-623	Phase 1	LXR agonist	AR|NR1H2|NR1H3|NR1I2|NR3C1			0.85	1.09	0.99	0.86	0.69	1.04	0.977	0.121	0.863	0.175	0.373	0.785	0.0236	0.147	-0.113	0.207	0.717
ONC0001439	naltriben	Preclinical	opioid receptor antagonist	OPRD1|OPRK1|OPRM1			0.95	1.2	1.01	0.91	1.09	0.82	1053	0.131	0.94	0.137	0.661	0.916	0.211	0.681	-0.113	0.18	0.695
ONC0005632	FLUNIXIN MEGLUMINE	NA	NA	NA	NA	NA	1.04	1.25	1.11	1.06	0.96	1.04	1133	0.107	1.02	0.0529	0.882	0.993	0.666	1	-0.113	0.1	0.611
ONC0005581	Cefsulodin (sodium)	NA	NA	NA	NA	NA	1.08	0.89	1.18	1.01	0.84	0.96	1.05	0.147	0.937	0.0874	0.649	0.915	0.196	0.658	-0.113	0.165	0.682
ONC0000815	Retaspimycin (Hydrochloride)	NA	NA	NA	NA	NA	0.09	0.28	0.04	0.03	0.07	-0.03	0.137	0.127	0.023	0.0503	1.99e-17	1.94e-15	1.14e-50	1.65e-48	-0.113	0.129	0.632
ONC0003302	TESTOSTERONE PROPIONATE	NA	NA	NA	NA	NA	0.77	1.5	1.34	1.26	0.96	1.05	1203	0.384	1.09	0.154	0.969	1	0.934	1	-0.113	0.336	0.84
ONC0000049	niguldipine-(S)-(+)	Preclinical	adrenergic receptor antagonist	ADRA1A			1.01	0.88	1.25	0.91	0.99	0.9	1047	0.188	0.933	0.0493	0.637	0.909	0.182	0.63	-0.113	0.204	0.71
ONC0001045	Genz-123346 (free base)	NA	NA	NA	NA	NA	0.96	0.91	1.02	0.74	0.94	0.87	0.963	0.0551	0.85	0.101	0.326	0.763	0.0143	0.0945	-0.113	0.0926	0.606
ONC0001824	Prexasertib (dihydrochloride)	NA	NA	NA	NA	NA	0.19	0.21	0.44	0.23	0.09	0.18	0.28	0.139	0.167	0.0709	1.01e-12	5.09e-11	2.39e-37	1.12e-35	-0.113	0.149	0.659
ONC0001989	Testosterone (undecanoate)	NA	NA	NA	NA	NA	1.18	1.15	1.05	1.06	0.98	1	1127	0.0681	1013	0.0416	0.869	0.988	0.628	1	-0.113	0.0414	0.477
ONC0001955	BMS-688521	Preclinical	ICAM1 antagonist|leukocyte function-associated antigen receptor antagonist	ICAM1			0.96	0.88	1.32	1.05	0.89	0.88	1053	0.234	0.94	0.0954	0.661	0.916	0.211	0.681	-0.113	0.251	0.76
ONC0001151	Seocalcitol	Phase 3	vitamin D receptor agonist	VDR			0.96	0.84	1.36	0.89	0.93	1	1053	0.272	0.94	0.0557	0.661	0.916	0.211	0.681	-0.113	0.274	0.783
ONC0005320	chlorfenson	Phase 2	other antifungal				0.92	1.06	1.25	0.94	0.97	0.98	1077	0.166	0.963	0.0208	0.739	0.947	0.329	0.839	-0.113	0.179	0.695
ONC0005291	OXINIACIC ACID	NA	NA	NA	NA	NA	0.98	1.04	1.18	0.94	1	0.92	1067	0.103	0.953	0.0416	0.707	0.935	0.275	0.784	-0.113	0.0934	0.606
ONC0005435	METICRANE	Launched	diuretic		cardiology	edema	0.85	1.32	1.01	0.98	0.96	0.9	1.06	0.239	0.947	0.0416	0.684	0.925	0.242	0.735	-0.113	0.25	0.76
ONC0002143	abametapir	Phase 3	metalloproteinase inhibitor	MMP9			0.82	1.04	1.19	0.74	1	0.98	1017	0.186	0.907	0.145	0.525	0.861	0.0939	0.419	-0.11	0.233	0.744
ONC0004687	Aloperine	Preclinical					0.96	1.05	1.35	0.98	1.02	1.03	1.12	0.204	1.01	0.0265	0.855	0.984	0.608	0.997	-0.11	0.225	0.735
ONC0004176	MEPRYLCAINE HYDROCHLORIDE	NA	NA	NA	NA	NA	1.16	1.01	1.07	1.07	0.84	1	1.08	0.0755	0.97	0.118	0.749	0.947	0.366	0.877	-0.11	0.128	0.632
ONC0003529	DMP-543	Phase 2	acetylcholine release enhancer				1.06	1.11	1.09	1.05	0.97	0.91	1087	0.0252	0.977	0.0702	0.769	0.954	0.406	0.902	-0.11	0.0501	0.512
ONC0004917	Andarine (GTX-007)	NA	NA	NA	NA	NA	1.4	0.87	0.98	0.87	1.09	0.96	1083	0.28	0.973	0.111	0.759	0.95	0.386	0.893	-0.11	0.289	0.802
ONC0005076	Ipatasertib (GDC-0068)	NA	NA	NA	NA	NA	1.02	1.06	0.98	0.97	0.84	0.92	1.02	0.04	0.91	0.0656	0.537	0.863	0.103	0.446	-0.11	0.0407	0.475
ONC0004420	reboxetine	Launched	adrenergic receptor antagonist	SLC6A2	neurology/psychiatry	depression	1.13	0.94	1.34	1.05	1	1.03	1137	0.2	1027	0.0252	0.888	0.995	0.703	1	-0.11	0.221	0.732
ONC0005001	SGI-1776 free base	NA	NA	NA	NA	NA	1.51	0.65	1.07	0.97	1	0.93	1077	0.43	0.967	0.0351	0.739	0.947	0.347	0.857	-0.11	0.351	0.85
ONC0003628	2-phenylmelatonin	Preclinical	melatonin receptor agonist	MTNR1A|MTNR1B			1.02	0.97	0.97	0.87	0.85	0.91	0.987	0.0289	0.877	0.0306	0.41	0.805	0.0376	0.214	-0.11	0.00532	0.253
ONC0005129	AZD2858	Preclinical	glycogen synthase kinase inhibitor	GSK3B			1.06	0.91	1.25	1	0.98	0.91	1073	0.17	0.963	0.0473	0.728	0.942	0.329	0.839	-0.11	0.19	0.705
ONC0003860	glycitein	Phase 3	tumor necrosis factor release inhibitor	TNF			0.92	0.99	0.94	0.93	0.79	0.8	0.95	0.0361	0.84	0.0781	0.281	0.736	0.00954	0.0666	-0.11	0.0597	0.543
ONC0004280	SILIBININ	Launched	cytochrome P450 inhibitor	ALOX5	gastroenterology	hepatic cirrhosis	1.08	1.23	0.89	0.92	0.99	0.96	1067	0.17	0.957	0.0351	0.707	0.935	0.292	0.806	-0.11	0.19	0.705
ONC0002876	DIBEKACIN	Launched	bacterial 30S ribosomal subunit inhibitor		infectious disease	gram-negative bacterial infections	0.97	1.25	1.13	1.19	0.83	1	1117	0.14	1007	0.18	0.847	0.98	0.588	0.993	-0.11	0.227	0.738
ONC0000771	CARBAMAZEPINE	Launched	carboxamide antiepileptic	SCN10A|SCN11A|SCN1A|SCN2A|SCN3A|SCN4A|SCN5A|SCN7A|SCN8A|SCN9A	neurology/psychiatry	seizures	1.17	1.29	1.05	1.15	0.91	1.12	1.17	0.12	1.06	0.131	0.938	1	0.852	1	-0.11	0.172	0.687
ONC0002272	EED226	Preclinical	polycomb protein inhibitor	EED			1.03	1.09	1.23	1	1.05	0.97	1117	0.103	1007	0.0404	0.847	0.98	0.588	0.993	-0.11	0.0981	0.611
ONC0001612	BRL-54443	Preclinical	serotonin receptor agonist	HTR1E|HTR1F			1.36	0.67	1.09	1	0.96	0.83	1.04	0.348	0.93	0.0889	0.613	0.897	0.169	0.607	-0.11	0.322	0.83
ONC0001263	TPCA-1	Preclinical	IKK inhibitor	IKBKB			1.14	1.2	0.83	0.99	0.91	0.94	1057	0.199	0.947	0.0404	0.673	0.923	0.242	0.735	-0.11	0.22	0.73
ONC0002335	zotepine	Launched	dopamine receptor antagonist|serotonin receptor antagonist	ADRA2B|DRD2|DRD3|DRD4|HRH1|HTR1A|HTR1B|HTR1D|HTR1E|HTR2A|HTR2C|HTR6|HTR7|SLC6A2|SLC6A4	neurology/psychiatry	schizophrenia	1.07	0.91	1.14	0.92	0.93	0.94	1.04	0.118	0.93	0.01	0.613	0.897	0.169	0.607	-0.11	0.123	0.631
ONC0001490	CYM-50358	Preclinical	sphingosine 1-phosphate receptor antagonist	S1PR4			0.87	1.12	1.19	0.92	0.93	1	1.06	0.168	0.95	0.0436	0.684	0.925	0.258	0.761	-0.11	0.188	0.705
ONC0005482	Limaprost	NA	NA	NA	NA	NA	0.99	1.09	1.14	1.03	0.92	0.94	1073	0.0764	0.963	0.0586	0.728	0.942	0.329	0.839	-0.11	0.0618	0.549
ONC0005557	veliflapon	Phase 3	leukotriene synthesis inhibitor	ALOX5AP			0.93	1.07	1.07	1.05	0.91	0.78	1023	0.0808	0.913	0.135	0.55	0.868	0.112	0.472	-0.11	0.153	0.664
ONC0005561	tymazoline	Launched			allergy	allergic rhinitis	0.92	0.78	1.02	0.63	0.91	0.85	0.907	0.121	0.797	0.147	0.159	0.585	0.0013	0.0112	-0.11	0.188	0.705
ONC0001563	TAK-715	Phase 2	p38 MAPK inhibitor	MAPK14			0.93	1.09	0.89	0.74	0.91	0.93	0.97	0.106	0.86	0.104	0.349	0.774	0.0209	0.132	-0.11	0.135	0.641
ONC0000859	JNJ-40411813	Phase 2	glutamate receptor positive allosteric modulator	GRM2			1.02	1.07	0.9	0.84	0.91	0.91	0.997	0.0874	0.887	0.0404	0.448	0.825	0.0521	0.274	-0.11	0.074	0.58
ONC0002749	HOMIDIUM BROMIDE	NA	NA	NA	NA	NA	0.94	0.89	0.85	0.81	0.73	0.81	0.893	0.0451	0.783	0.0462	0.13	0.532	0.000648	0.00581	-0.11	0.021	0.37
ONC0000539	RETINOL	Launched	retinoid receptor ligand	ALDH1A1|ALDH1A2|ALDH1A3|DHRS3|DHRS4|LRAT|NR2C2|RBP1|RBP3|RDH11|RDH12|RDH13|RDH14|RDH5|RDH8|RETSAT|RHO|RLBP1|RXRA|RXRB|RXRG	dermatology	cosmetic|acne vulgaris (AV)|keratosis	1.11	1.16	0.98	0.96	0.99	0.97	1083	0.0929	0.973	0.0153	0.759	0.95	0.386	0.893	-0.11	0.0869	0.597
ONC0000004	H-89	Preclinical	PKA inhibitor	GSG2|PKIA|PRKACA			0.95	1.14	0.97	1	0.76	0.97	1.02	0.104	0.91	0.131	0.537	0.863	0.103	0.446	-0.11	0.161	0.674
ONC0002065	Hydroxysafflor yellow A	NA	NA	NA	NA	NA	1.29	1	1.12	1.15	1.06	0.87	1137	0.146	1027	0.143	0.888	0.995	0.703	1	-0.11	0.202	0.71
ONC0003323	ATROPINE SULFATE	NA	NA	NA	NA	NA	1.16	1.09	0.97	1.1	0.88	0.91	1073	0.0961	0.963	0.119	0.728	0.942	0.329	0.839	-0.11	0.142	0.652
ONC0002016	Flupentixol	Launched	dopamine receptor antagonist	ADRA1A|CHRM1|DRD1|DRD2|DRD3|DRD5|HTR2A	neurology/psychiatry	schizophrenia|depression	1.07	0.99	0.98	0.87	0.96	0.88	1013	0.0493	0.903	0.0493	0.512	0.856	0.0856	0.393	-0.11	0.0262	0.399
ONC0001825	Ro 48-8071 (fumarate)	NA	NA	NA	NA	NA	1.05	1.02	1.12	0.96	0.96	0.94	1063	0.0513	0.953	0.0115	0.695	0.93	0.275	0.784	-0.11	0.0296	0.416
ONC0001745	NS-8593	Preclinical	calcium-activated potassium channel modulator	KCNN1|KCNN2|KCNN3			0.94	1.27	0.98	0.86	1.08	0.92	1063	0.18	0.953	0.114	0.695	0.93	0.275	0.784	-0.11	0.215	0.726
ONC0005256	Clinofibrate	Launched	lipase clearing factor inhibitor	LPL	endocrinology	hypertriglyceridemia	0.91	1.17	0.96	0.67	1.03	1.02	1013	0.138	0.907	0.205	0.512	0.856	0.0939	0.419	-0.107	0.251	0.76
ONC0003521	sulmetozine	Launched	gastrin inhibitor	GAST	gastroenterology	peptic ulcer disease (PUD)	1.17	0.99	1.02	0.92	0.97	0.97	1.06	0.0964	0.953	0.0289	0.684	0.925	0.275	0.784	-0.107	0.0942	0.606
ONC0003602	AS-2444697	Preclinical	interleukin inhibitor	IRAK4			0.82	0.97	0.91	0.85	0.65	0.88	0.9	0.0755	0.793	0.125	0.144	0.563	0.0011	0.0095	-0.107	0.144	0.653
ONC0003541	HTMT	Preclinical	histamine receptor agonist	HRH4			1.22	1.15	1.09	1.09	0.97	1.08	1153	0.0651	1047	0.0666	0.916	1	0.799	1	-0.107	0.0591	0.541
ONC0004916	Elesclomol (STA-4783)	NA	NA	NA	NA	NA	0.26	0.42	0.12	0.12	0.19	0.17	0.267	0.15	0.16	0.0361	4e-13	2.14e-11	6.39e-38	3.19e-36	-0.107	0.172	0.687
ONC0004626	Dutasteride	Launched	5 alpha reductase inhibitor	SRD5A1|SRD5A2|SRD5A3	urology	benign prostatic hyperplasia (BPH)	1.36	1.16	1.09	1.05	1.13	1.11	1203	0.14	1097	0.0416	0.969	1	0.946	1	-0.107	0.159	0.671
ONC0004638	XL765	NA	NA	NA	NA	NA	1.39	1.02	1.07	1.01	1.13	1.02	1.16	0.201	1053	0.0666	0.925	1	0.827	1	-0.107	0.23	0.742
ONC0003832	caricotamide	Phase 2	NADPH quinone oxidoreductase inhibitor	NQO2			0.99	1.02	0.98	1.04	0.74	0.89	0.997	0.0208	0.89	0.15	0.448	0.825	0.0578	0.295	-0.107	0.171	0.687
ONC0003859	methylparaben	Launched	other antifungal		dermatology	cosmetic	0.96	1.29	1.27	1.05	1.14	1.01	1173	0.185	1067	0.0666	0.942	1	0.874	1	-0.107	0.214	0.725
ONC0005167	AZ5104	Preclinical	EGFR inhibitor	EGFR			0.35	-0.02	0.02	0.09	-0.01	-0.05	0.117	0.203	0.01	0.0721	3.78e-18	4.26e-16	5.13e-52	9.33e-50	-0.107	0.233	0.744
ONC0002473	pifithrin-cyclic	Preclinical	TP53 inhibitor	TP53			0.93	0.99	0.69	0.82	0.65	0.82	0.87	0.159	0.763	0.0981	0.0884	0.443	0.000212	0.00202	-0.107	0.194	0.706
ONC0004247	TRIMEBUTINE MALEATE	NA	NA	NA	NA	NA	1.25	1.02	0.83	0.91	0.99	0.88	1033	0.21	0.927	0.0569	0.588	0.885	0.157	0.579	-0.107	0.238	0.747
ONC0003371	Barnidipine HCl	NA	NA	NA	NA	NA	0.77	0.9	1.03	0.76	0.97	0.65	0.9	0.13	0.793	0.163	0.144	0.563	0.0011	0.0095	-0.107	0.214	0.725
ONC0003062	NPC-15199	Phase 2	ICAM1 antagonist	PPARG			1.09	0.92	1.08	1.06	0.64	1.07	1.03	0.0954	0.923	0.245	0.575	0.879	0.145	0.552	-0.107	0.27	0.778
ONC0000208	efonidipine-monoethanolate	NA	NA	NA	NA	NA	1.02	0.98	1.17	1	0.88	0.97	1057	0.1	0.95	0.0624	0.673	0.923	0.258	0.761	-0.107	0.103	0.614
ONC0000719	CEPHAPIRIN SODIUM	NA	NA	NA	NA	NA	1.16	0.98	1.15	0.92	0.98	1.07	1097	0.101	0.99	0.0755	0.797	0.966	0.487	0.945	-0.107	0.111	0.622
ONC0001061	NQDI-1	Preclinical	caspase inhibitor	CASP3			1	0.77	1.03	0.79	0.84	0.85	0.933	0.142	0.827	0.0321	0.229	0.688	0.0054	0.0411	-0.107	0.161	0.676
ONC0001123	Remimazolam (benzenesulfonate)	NA	NA	NA	NA	NA	1.03	1.05	1.12	1.02	0.87	0.99	1067	0.0473	0.96	0.0794	0.707	0.935	0.31	0.826	-0.107	0.066	0.561
ONC0001106	CC-223	Phase 2	mTOR inhibitor	MTOR			1.02	1.01	0.98	0.88	0.8	1.01	1003	0.0208	0.897	0.106	0.473	0.837	0.0706	0.343	-0.107	0.11	0.622
ONC0001395	hydroxyfasudil	Preclinical	rho associated kinase inhibitor	PKIA|PRKACA|ROCK1			1.27	1.05	0.99	1.04	1.02	0.93	1103	0.147	0.997	0.0586	0.815	0.972	0.528	0.968	-0.107	0.17	0.687
ONC0003479	Trovafloxacin mesylate	NA	NA	NA	NA	NA	1.1	1.29	1.01	0.99	1	1.09	1133	0.143	1027	0.0551	0.882	0.993	0.703	1	-0.107	0.163	0.681
ONC0001308	SB-225002	Preclinical	CC chemokine receptor antagonist	CXCR2			1.33	0.98	0.99	0.98	1.05	0.95	1.1	0.199	0.993	0.0513	0.806	0.968	0.507	0.957	-0.107	0.227	0.738
ONC0000170	VU-152100	Preclinical	acetylcholine receptor allosteric modulator	CHRM4			1.21	0.94	1.26	1.01	1.06	1.02	1137	0.172	1.03	0.0265	0.888	0.995	0.72	1	-0.107	0.198	0.708
ONC0000115	SM-21	Preclinical	sigma receptor antagonist	PGRMC1			1.08	1.05	1.06	1.06	1.03	0.78	1063	0.0153	0.957	0.154	0.695	0.93	0.292	0.806	-0.107	0.176	0.692
ONC0000151	GPP-78	Preclinical	NAMPT inhibitor	NAMPT			0.22	0.15	0.18	-0.04	0.16	0.11	0.183	0.0351	0.077	0.104	8.34e-16	6.18e-14	1.82e-45	1.58e-43	-0.107	0.106	0.616
ONC0001556	8-bromo-cGMP	Preclinical	PKA activator	PRKG1			0.99	1.06	1.21	1.04	0.94	0.96	1087	0.112	0.98	0.0529	0.769	0.954	0.426	0.919	-0.107	0.119	0.63
ONC0003248	FAMOTIDINE	Launched	histamine receptor antagonist	HRH2	gastroenterology	heartburn	0.92	1.26	0.96	0.99	0.97	0.86	1047	0.186	0.94	0.07	0.637	0.909	0.211	0.681	-0.107	0.216	0.726
ONC0002074	THZ1	Preclinical	CDK inhibitor	CDK7			0.23	0.27	0.32	0.33	0.05	0.12	0.273	0.0451	0.167	0.146	6.37e-13	3.38e-11	2.39e-37	1.12e-35	-0.107	0.166	0.684
ONC0002033	Mavorixafor (trihydrochloride)	NA	NA	NA	NA	NA	0.76	1.43	1.18	0.96	1.08	1.01	1123	0.339	1017	0.0603	0.862	0.986	0.647	1	-0.107	0.321	0.83
ONC0003291	DESOXYCORTICOSTERONE ACETATE	NA	NA	NA	NA	NA	0.92	1.22	1	0.99	0.95	0.88	1047	0.155	0.94	0.0557	0.637	0.909	0.211	0.681	-0.107	0.179	0.695
ONC0005325	TOLONIUM CHLORIDE	NA	NA	NA	NA	NA	0.59	0.46	0.65	0.37	0.44	0.57	0.567	0.0971	0.46	0.101	9.68e-06	0.00023	1.22e-16	2.37e-15	-0.107	0.129	0.632
ONC0005340	DOXAZOSIN MESYLATE	NA	NA	NA	NA	NA	0.85	1.02	0.93	0.73	0.93	0.82	0.933	0.085	0.827	0.1	0.229	0.688	0.0054	0.0411	-0.107	0.117	0.63
ONC0002172	enoximone	Launched	phosphodiesterase inhibitor	PDE3A	cardiology	congestive heart failure	1.06	1.08	1.04	0.93	0.97	0.97	1.06	0.02	0.957	0.0231	0.684	0.925	0.292	0.806	-0.103	0.00226	0.181
ONC0004741	Vorinostat (SAHA, MK0683)	NA	NA	NA	NA	NA	1.25	0.9	1.33	0.98	1.17	1.02	1.16	0.229	1057	0.1	0.925	1	0.84	1	-0.103	0.265	0.772
ONC0004768	Asaraldehyde (Asaronaldehyde)	NA	NA	NA	NA	NA	1.16	1.13	1.12	1.06	1	1.04	1137	0.0208	1033	0.0306	0.888	0.995	0.737	1	-0.103	0.00573	0.26
ONC0005264	Hematoxylin (Hydroxybrazilin)	NA	NA	NA	NA	NA	0.94	1.27	1.27	0.99	1.03	1.15	1.16	0.191	1057	0.0833	0.925	1	0.84	1	-0.103	0.229	0.741
ONC0004157	AMITRAZ	Launched	adrenergic receptor agonist	ADRA1A|ADRA2A	infectious disease	generalized demodicosis	1.29	0.95	0.87	1	0.83	0.97	1037	0.223	0.933	0.0907	0.6	0.889	0.182	0.63	-0.103	0.259	0.767
ONC0004325	ACY-1215	Phase 1/Phase 2	HDAC inhibitor	HDAC1|HDAC2|HDAC3|HDAC6|HDAC8			0.85	1.03	0.98	0.96	0.81	0.78	0.953	0.0929	0.85	0.0964	0.292	0.741	0.0143	0.0945	-0.103	0.126	0.632
ONC0003767	phenprocoumon	Launched	vitamin K antagonist	VKORC1	hematology	thrombosis|pulmonary embolism (PE)	0.91	1.14	1.03	0.91	0.92	0.94	1027	0.115	0.923	0.0153	0.563	0.874	0.145	0.552	-0.103	0.129	0.632
ONC0004008	ITOPRIDE HYDROCHLORIDE	NA	NA	NA	NA	NA	0.85	1.12	1.21	0.99	0.93	0.95	1.06	0.187	0.957	0.0306	0.684	0.925	0.292	0.806	-0.103	0.22	0.731
ONC0004932	Oleanolic Acid (Caryophyllin)	NA	NA	NA	NA	NA	0.96	1.09	1.39	1.04	1.07	1.02	1147	0.221	1043	0.0252	0.906	1	0.785	1	-0.103	0.251	0.76
ONC0005071	NSC697923	Preclinical	ubiquitin-conjugating enzyme inhibitor	UBE2N			1.17	1.13	1.15	0.96	1.13	1.05	1.15	0.02	1047	0.085	0.911	1	0.799	1	-0.103	0.0821	0.586
ONC0005182	(S)-crizotinib	NA	NA	NA	NA	NA	1.08	0.83	1.33	1	0.92	1.01	1.08	0.25	0.977	0.0493	0.749	0.947	0.406	0.902	-0.103	0.275	0.785
ONC0003947	CLARITHROMYCIN	Launched	bacterial 50S ribosomal subunit inhibitor	CYP3A4	otolaryngology|pulmonary|infectious disease	pharyngitis|tonsillitis|sinusitis|bronchitis|pneumonia|skin infections|otitis	1.6	0.84	0.85	1.04	1	0.94	1097	0.436	0.993	0.0503	0.797	0.966	0.507	0.957	-0.103	0.361	0.85
ONC0003053	L-365260	Phase 2	CCK receptor antagonist	CCKAR|CCKBR|KCNQ1			1.19	1.07	1.11	1.07	1.02	0.97	1123	0.0611	1.02	0.05	0.862	0.986	0.666	1	-0.103	0.0443	0.493
ONC0000692	ERGOCALCIFEROL	Launched	vitamin analog	VDR	endocrinology|orthopedics	hypoparathyroidism|rickets|hypophosphatemia	1.14	1.19	1.04	1.1	1.01	0.95	1123	0.0764	1.02	0.0755	0.862	0.986	0.666	1	-0.103	0.0855	0.594
ONC0002257	Motolimod	Phase 2	toll-like receptor agonist	TLR8			1.08	0.98	0.97	0.84	0.94	0.94	1.01	0.0608	0.907	0.0577	0.499	0.851	0.0939	0.419	-0.103	0.05	0.512
ONC0001085	I-BRD9	Preclinical	bromodomain inhibitor	BRD9			1.24	0.89	0.89	0.84	0.83	1.04	1007	0.202	0.903	0.118	0.486	0.843	0.0856	0.393	-0.103	0.248	0.76
ONC0000359	GEMFIBROZIL	Launched	lipoprotein lipase activator	LPL|PPARA|SLCO1B1|SLCO1B3|SLCO2B1	endocrinology|cardiology	hyperlipidemia|coronary heart disease	1.1	1.36	1.01	1.05	1.09	1.02	1157	0.182	1053	0.0351	0.921	1	0.827	1	-0.103	0.215	0.726
ONC0000339	AMILORIDE HYDROCHLORIDE	NA	NA	NA	NA	NA	1.02	1.11	1.18	0.87	1.11	1.02	1103	0.0802	1	0.121	0.815	0.972	0.548	0.978	-0.103	0.148	0.654
ONC0003494	Harringtonine	Phase 3	protein synthesis inhibitor				0.01	0.09	0.04	-0.05	-0.17	0.05	0.047	0.0404	-0.057	0.11	8.47e-21	1.36e-18	5.07e-59	2.04e-56	-0.103	0.12	0.63
ONC0000340	CLOXACILLIN SODIUM	NA	NA	NA	NA	NA	0.98	1.09	1.04	0.73	0.88	1.19	1037	0.0551	0.933	0.235	0.6	0.889	0.182	0.63	-0.103	0.264	0.772
ONC0000163	SEN-1269	Preclinical	beta amyloid inhibitor	APP			0.99	1.17	1.08	1.06	0.64	1.23	1.08	0.09	0.977	0.304	0.749	0.947	0.406	0.902	-0.103	0.311	0.821
ONC0001534	DRF053-(R)	Preclinical	CDK inhibitor	CSNK1A1			0.84	1.03	1.08	0.98	0.72	0.94	0.983	0.127	0.88	0.14	0.398	0.792	0.042	0.232	-0.103	0.199	0.708
ONC0001505	rolipram-R(-)	NA	NA	NA	NA	NA	1.08	1.07	1.13	0.91	1.08	0.98	1093	0.0321	0.99	0.0854	0.788	0.963	0.487	0.945	-0.103	0.0803	0.584
ONC0005602	PENTETIC ACID	NA	NA	NA	NA	NA	1.08	1.24	1.01	0.88	1	1.14	1.11	0.118	1007	0.13	0.832	0.975	0.588	0.993	-0.103	0.183	0.702
ONC0003241	kifunensine	Phase 1	mannosidase inhibitor	MAN1B1|MAN2A1			1	1.15	1.08	1	0.81	1.11	1077	0.0751	0.973	0.152	0.739	0.947	0.386	0.893	-0.103	0.185	0.703
ONC0000803	TBOA-(DL)	Preclinical	excitatory amino acid transporter inhibitor	SLC1A1|SLC1A2|SLC1A3|SLC1A6|SLC1A7			1.33	0.97	1.2	1.04	1.08	1.07	1167	0.182	1063	0.0208	0.934	1	0.864	1	-0.103	0.215	0.726
ONC0000854	SK&F-10047-(+)	Phase 1	sigma receptor agonist	SIGMAR1			0.95	1	1.08	1.05	0.71	0.96	1.01	0.0656	0.907	0.176	0.499	0.851	0.0939	0.419	-0.103	0.211	0.722
ONC0005519	tetrahydrofolic-acid	Launched		FOLR2			1.42	0.87	0.97	1	0.98	0.97	1087	0.293	0.983	0.0153	0.769	0.954	0.446	0.932	-0.103	0.302	0.814
ONC0000507	NIFEDIPINE	Launched	calcium channel blocker	CACNA1C|CACNA1D|CACNA1F|CACNA1H|CACNA1S|CACNA2D1|CACNB2|CALM1|GLRA1|GLRA3|GLRB|KCNA1|KCNA5|NR1I2|TRPM3	cardiology	vasospastic angina|chronic stable angina	0.98	1.03	0.93	0.87	0.85	0.91	0.98	0.05	0.877	0.0306	0.385	0.789	0.0376	0.214	-0.103	0.0243	0.391
ONC0001842	Merimepodib	Phase 2	inosine monophosphate dehydrogenase inhibitor	IMPDH1			0.87	0.98	0.73	0.79	0.75	0.73	0.86	0.125	0.757	0.0306	0.0739	0.403	0.000143	0.0014	-0.103	0.144	0.653
ONC0001997	trans-4-[8-(3-Fluorophenyl)-1,7-naphthyridin-6-yl]cyclohexanecarboxylic-acid	Preclinical					1.19	1.09	1.1	1.01	1.04	1.02	1127	0.0551	1023	0.0153	0.869	0.988	0.684	1	-0.103	0.0369	0.455
ONC0001809	Cerdulatinib	NA	NA	NA	NA	NA	0.76	1.13	1.18	0.84	1.01	0.91	1023	0.229	0.92	0.0854	0.55	0.868	0.133	0.526	-0.103	0.263	0.772
ONC0001821	GW 501516	NA	NA	NA	NA	NA	0.95	1.02	1.02	0.94	0.8	0.94	0.997	0.0404	0.893	0.0808	0.448	0.825	0.064	0.318	-0.103	0.0719	0.572
ONC0001731	Org-25543	Preclinical	glycine transporter inhibitor	GLRB|SLC6A5			0.91	0.93	1.2	0.99	1.07	0.67	1013	0.162	0.91	0.212	0.512	0.856	0.103	0.446	-0.103	0.271	0.778
ONC0005378	bepridil	Launched	calcium channel blocker	KCNQ4	cardiology	angina pectoris	1.06	1.07	0.92	0.91	0.94	0.89	1017	0.0839	0.913	0.0252	0.525	0.861	0.112	0.472	-0.103	0.079	0.582
ONC0005373	valpromide	Launched	epoxide hydolase inhibitor		neurology/psychiatry	epilepsy	0.88	1.06	1.04	0.73	0.94	1	0.993	0.0987	0.89	0.142	0.435	0.817	0.0578	0.295	-0.103	0.183	0.701
ONC0002938	thiocolchicoside	Launched	GABA receptor antagonist	GABRA1|GABRB2|GABRG2|GLRA1|GLRB	neurology/psychiatry	muscle relaxant	1.08	1	1.08	0.98	1	0.87	1053	0.0462	0.95	0.07	0.661	0.916	0.258	0.761	-0.103	0.0552	0.532
ONC0002960	N-acetylmannosamine	Phase 2					0.64	1	1.42	0.84	1.01	0.9	1.02	0.39	0.917	0.0862	0.537	0.863	0.122	0.499	-0.103	0.347	0.85
ONC0004773	Roflumilast (Daxas)	NA	NA	NA	NA	NA	1.34	0.93	1.06	1.06	1	0.97	1.11	0.21	1.01	0.0458	0.832	0.975	0.608	0.997	-0.1	0.249	0.76
ONC0004063	TIOCONAZOLE	Launched	sterol demethylase inhibitor		infectious disease	yeast infection	1	0.95	0.98	0.9	0.97	0.76	0.977	0.0252	0.877	0.107	0.373	0.785	0.0376	0.214	-0.1	0.122	0.63
ONC0004146	SPARFLOXACIN	Withdrawn	bacterial DNA gyrase inhibitor	TOP2A			1.23	1.02	1.03	0.92	1	1.06	1093	0.118	0.993	0.0702	0.788	0.963	0.507	0.957	-0.1	0.146	0.653
ONC0004168	SARAFLOXACIN HYDROCHLORIDE	NA	NA	NA	NA	NA	1.03	0.94	1.03	0.96	0.92	0.82	1	0.052	0.9	0.0721	0.461	0.831	0.0779	0.368	-0.1	0.0651	0.56
ONC0004914	Mosapride citrate	NA	NA	NA	NA	NA	1.04	0.75	1.15	1	0.92	0.72	0.98	0.207	0.88	0.144	0.385	0.789	0.042	0.232	-0.1	0.267	0.774
ONC0004879	Org 27569	NA	NA	NA	NA	NA	0.96	1.34	0.74	0.94	0.96	0.84	1013	0.304	0.913	0.0643	0.512	0.856	0.112	0.472	-0.1	0.314	0.823
ONC0004926	Fenticonazole nitrate	NA	NA	NA	NA	NA	1.08	0.79	1.04	0.86	0.81	0.94	0.97	0.157	0.87	0.0656	0.349	0.774	0.0299	0.177	-0.1	0.196	0.706
ONC0002538	NIDA-41020	Preclinical	cannabinoid receptor antagonist	CNR1			0.95	1.06	1.36	1.12	0.89	1.06	1123	0.212	1023	0.119	0.862	0.986	0.684	1	-0.1	0.263	0.772
ONC0003045	CGP-71683	Preclinical	neuropeptide receptor antagonist	NPY5R			1.02	1.23	1.02	1.03	1.02	0.92	1.09	0.121	0.99	0.0608	0.779	0.959	0.487	0.945	-0.1	0.146	0.653
ONC0003050	PD-166793	Preclinical	collagenase inhibitor|metalloproteinase inhibitor	MMP13|MMP2|MMP3			0.96	1.43	0.99	0.95	0.97	1.16	1127	0.263	1027	0.116	0.869	0.988	0.703	1	-0.1	0.296	0.81
ONC0002888	PYRITHYLDIONE	Withdrawn	psychoactive drug				1.01	1	1.02	0.85	0.89	0.99	1.01	0.01	0.91	0.0721	0.499	0.851	0.103	0.446	-0.1	0.0679	0.565
ONC0000790	Aldoxorubicin	Phase 3	topoisomerase inhibitor	TOP2A			0.3	0.36	0.32	0.35	0.13	0.2	0.327	0.0306	0.227	0.112	2.3e-11	9.88e-10	2.14e-32	7.39e-31	-0.1	0.13	0.633
ONC0000775	levosulpiride	Launched	dopamine receptor antagonist	CA1|CA12|CA7|DRD2|DRD3	neurology/psychiatry|gastroenterology|urology	schizophrenia|psychosis|anxiety|vertigo|dyspepsia|irritable bowel syndrome|premature ejaculation (PE)	1.19	0.98	1.36	1.06	1.08	1.09	1177	0.19	1077	0.0153	0.946	1	0.904	1	-0.1	0.23	0.742
ONC0002285	Zofenopril (calcium)	NA	NA	NA	NA	NA	0.95	1.02	0.94	0.83	1.06	0.72	0.97	0.0436	0.87	0.173	0.349	0.774	0.0299	0.177	-0.1	0.213	0.724
ONC0002568	BIX-02189	Preclinical	MEK inhibitor	MAP2K5|MAPK7			0.98	0.9	1.22	1	0.81	0.99	1033	0.167	0.933	0.107	0.588	0.885	0.182	0.63	-0.1	0.219	0.729
ONC0002219	Bismuth Subsalicylate	NA	NA	NA	NA	NA	0.98	1.06	1.19	1.1	1	0.83	1077	0.106	0.977	0.137	0.739	0.947	0.406	0.902	-0.1	0.188	0.705
ONC0002595	ARC-239	Preclinical	adrenergic receptor antagonist	ADRA2A|ADRA2B|ADRA2C			1.1	0.99	1.06	1.04	0.82	0.99	1.05	0.0557	0.95	0.115	0.649	0.915	0.258	0.761	-0.1	0.136	0.643
ONC0001614	CID-2745687	Preclinical	G protein-coupled receptor antagonist	GPR35			0.99	0.89	1.14	0.84	0.87	1.01	1007	0.126	0.907	0.0907	0.486	0.843	0.0939	0.419	-0.1	0.166	0.684
ONC0000342	SB-525334	Preclinical	TGF beta receptor inhibitor	TGFBR1			1.03	0.85	1.1	1.03	0.78	0.87	0.993	0.129	0.893	0.127	0.435	0.817	0.064	0.318	-0.1	0.196	0.706
ONC0003458	Hypericin	Phase 3	tyrosine kinase inhibitor				0.85	0.96	1	0.89	0.95	0.67	0.937	0.0777	0.837	0.147	0.239	0.699	0.0083	0.0596	-0.1	0.187	0.705
ONC0001648	SB-772077B	Preclinical	rho associated kinase inhibitor	ROCK1|ROCK2			1.01	0.82	0.99	0.74	0.91	0.87	0.94	0.104	0.84	0.0889	0.249	0.706	0.00954	0.0666	-0.1	0.138	0.647
ONC0000100	tyrphostin-AG-494	Preclinical	EGFR inhibitor	EGFR			1.15	1.04	1.11	1.1	0.99	0.91	1.1	0.0557	1	0.0954	0.806	0.968	0.548	0.978	-0.1	0.104	0.616
ONC0002303	thioproperazine	Launched	dopamine receptor antagonist	ADRA1A|ADRA1B|DRD1|DRD2|HTR1A|HTR2A	neurology/psychiatry	schizophrenia	0.93	0.85	1.4	0.86	1	1.02	1.06	0.297	0.96	0.0872	0.684	0.925	0.31	0.826	-0.1	0.312	0.822
ONC0005622	Riociguat	Launched	guanylate cyclase stimulant	GUCY1A2|GUCY1A3|GUCY1B2|GUCY1B3	cardiology	hypertension	1.09	1.07	1.08	0.95	0.96	1.03	1.08	0.01	0.98	0.0436	0.749	0.947	0.426	0.919	-0.1	0.0258	0.397
ONC0001553	Ro-25-6981	Preclinical	glutamate receptor antagonist|monamine transporter modulator	GRIN2B			0.79	0.86	1.49	0.99	0.96	0.89	1047	0.386	0.947	0.0513	0.637	0.909	0.242	0.735	-0.1	0.349	0.85
ONC0003191	ETHAVERINE HYDROCHLORIDE	NA	NA	NA	NA	NA	1	1.08	1.07	0.88	1.01	0.96	1.05	0.0436	0.95	0.0656	0.649	0.915	0.258	0.761	-0.1	0.0514	0.517
ONC0003218	TRYPTOPHAN (L)	NA	NA	NA	NA	NA	0.95	1.26	1.21	1.01	1.06	1.05	1.14	0.166	1.04	0.0265	0.894	0.998	0.769	1	-0.1	0.204	0.71
ONC0000587	HYDROXYUREA	Launched	ribonucleotide reductase inhibitor	RRM1|RRM2|RRM2B	hematologic malignancy|oncology	chronic myeloid leukemia (CML)|head and neck squamous cell carcinoma (HNSCC)	0.83	0.84	1.47	0.92	0.99	0.93	1047	0.367	0.947	0.0379	0.637	0.909	0.242	0.735	-0.1	0.342	0.846
ONC0000566	KETOCONAZOLE	Launched	sterol demethylase inhibitor	KCNA10	dermatology	seborrheic dermatitis	1.19	0.79	1.14	0.92	0.89	1.01	1.04	0.218	0.94	0.0624	0.613	0.897	0.211	0.681	-0.1	0.257	0.766
ONC0000571	FOSCARNET SODIUM	NA	NA	NA	NA	NA	1.19	1.01	0.74	0.85	0.86	0.93	0.98	0.226	0.88	0.0436	0.385	0.789	0.042	0.232	-0.1	0.263	0.772
ONC0000591	SULFAMETHIZOLE	Launched	bacterial antifolate		infectious disease	urinary tract infections	1.04	0.81	0.99	0.79	0.96	0.79	0.947	0.121	0.847	0.0981	0.27	0.728	0.0125	0.0846	-0.1	0.165	0.683
ONC0000502	PRAZIQUANTEL	Launched	anthelmintic agent		infectious disease	gastrointestinal parasites|cystic hydatid disease|schistosomiasis	0.96	0.77	1.27	0.82	0.83	1.05	1	0.252	0.9	0.13	0.461	0.831	0.0779	0.368	-0.1	0.293	0.804
ONC0003113	TRIFLUPROMAZINE HYDROCHLORIDE	NA	NA	NA	NA	NA	0.89	0.95	1.49	1	1.02	1.01	1.11	0.33	1.01	0.01	0.832	0.975	0.608	0.997	-0.1	0.326	0.834
ONC0003303	GRISEOFULVIN	Launched	tubulin polymerization inhibitor	KRT12	infectious disease	ringworm|tinea pedis	1.45	1.2	0.71	1.11	0.9	1.05	1.12	0.376	1.02	0.108	0.855	0.984	0.666	1	-0.1	0.348	0.85
ONC0002091	ARV-825	Preclinical	bromodomain inhibitor	BRD4			0.28	0.17	0.38	0.17	0.18	0.18	0.277	0.105	0.177	0.00577	8.03e-13	4.15e-11	1.7e-36	7.46e-35	-0.1	0.12	0.63
ONC0001924	bendazac	Launched	cyclooxygenase inhibitor	PTGS1|PTGS2	neurology/psychiatry|rheumatology	muscle pain|joint pain	0.76	1.22	1.01	0.73	1.1	0.86	0.997	0.23	0.897	0.188	0.448	0.825	0.0706	0.343	-0.1	0.296	0.81
ONC0000985	S1P1 Agonist III	NA	NA	NA	NA	NA	1.02	0.95	1.05	1.09	0.89	0.74	1007	0.0513	0.907	0.176	0.486	0.843	0.0939	0.419	-0.1	0.215	0.726
ONC0005397	sari-59-801	Phase 1					1.45	0.94	0.77	1.11	1.02	0.73	1053	0.354	0.953	0.199	0.661	0.916	0.275	0.784	-0.1	0.349	0.85
ONC0005428	pyrazoloacridine	Phase 2	topoisomerase inhibitor	TOP1|TOP2A			0.97	0.96	1.11	0.93	0.84	0.97	1013	0.0839	0.913	0.0666	0.512	0.856	0.112	0.472	-0.1	0.0924	0.606
ONC0005389	nimustine	Launched	DNA alkylating agent				0.73	1.2	1.32	0.81	1.04	1.1	1083	0.312	0.983	0.153	0.759	0.95	0.446	0.932	-0.1	0.327	0.834
ONC0002914	methylprednisolone-aceponate	Launched	anti-inflammatory agent|glucocorticoid receptor agonist	NR3C1	endocrinology|rheumatology|infectious disease|allergy|pulmonary|gastroenterology|dermatology|neurology/psychiatry|hematology	congenital adrenal hyperplasia|thyroiditis|hypercalcemia|rheumatoid arthritis|bursitis|epicondylitis|allergic rhinitis|asthma|ulcerative colitis|enteritis|osteoarthritis|psoriasis|multiple sclerosis|anemia	0.91	1	1.07	0.83	0.97	0.88	0.993	0.0802	0.893	0.0709	0.435	0.817	0.064	0.318	-0.1	0.0911	0.606
ONC0002114	PD-156707	Preclinical	endothelin receptor antagonist	EDNRA|EDNRB			0.93	1.14	1.16	0.83	1.04	1.07	1077	0.127	0.98	0.131	0.739	0.947	0.426	0.919	-0.097	0.206	0.713
ONC0002125	clofedanol	Launched	histamine receptor antagonist	HRH1	pulmonary	cough suppressant	1.12	1.01	1.4	1.11	1.03	1.1	1177	0.201	1.08	0.0436	0.946	1	0.912	1	-0.097	0.247	0.759
ONC0004785	Bazedoxifene HCl	NA	NA	NA	NA	NA	0.58	1.21	1.15	0.87	0.98	0.8	0.98	0.348	0.883	0.0907	0.385	0.789	0.0468	0.252	-0.097	0.341	0.846
ONC0002148	U-0521	Preclinical	catechol O methyltransferase inhibitor	COMT			1.06	1.21	1.06	1.06	0.98	1	1.11	0.0866	1013	0.0416	0.832	0.975	0.628	1	-0.097	0.0918	0.606
ONC0004573	Fluorometholone Acetate	NA	NA	NA	NA	NA	0.85	1.33	1.04	0.61	1.21	1.11	1073	0.242	0.977	0.321	0.728	0.942	0.406	0.902	-0.097	0.35	0.85
ONC0004358	NU7441(KU-57788)	NA	NA	NA	NA	NA	0.94	0.8	1.2	0.72	1.03	0.9	0.98	0.203	0.883	0.156	0.385	0.789	0.0468	0.252	-0.097	0.275	0.785
ONC0004321	Valnemulin HCl	NA	NA	NA	NA	NA	1.56	1.2	1.44	1.35	1.26	1.3	1.4	0.183	1303	0.0451	1	1	1	1	-0.097	0.23	0.742
ONC0005087	Laquinimod (ABR-215062)	NA	NA	NA	NA	NA	0.86	0.92	1.54	1.07	1	0.96	1107	0.376	1.01	0.0557	0.823	0.974	0.608	0.997	-0.097	0.351	0.85
ONC0004046	PREGABALIN	NA	NA	NA	NA	NA	0.91	1.37	0.89	0.99	0.98	0.91	1057	0.272	0.96	0.0436	0.673	0.923	0.31	0.826	-0.097	0.301	0.813
ONC0004007	CEFDITORIN PIVOXIL	NA	NA	NA	NA	NA	1.19	1.02	1	1.02	1.06	0.84	1.07	0.104	0.973	0.117	0.717	0.938	0.386	0.893	-0.097	0.173	0.689
ONC0004841	AT7519	Phase 2	CDK inhibitor	CDK1|CDK2|CDK4|CDK5|CDK6|CDK9			0.97	1.46	0.99	1.2	0.98	0.95	1.14	0.277	1043	0.137	0.894	0.998	0.785	1	-0.097	0.313	0.822
ONC0004895	JNJ 26854165 (Serdemetan)	NA	NA	NA	NA	NA	1	0.95	1.2	0.98	0.93	0.95	1.05	0.132	0.953	0.0252	0.649	0.915	0.275	0.784	-0.097	0.166	0.684
ONC0005162	GSK J4 HCl	NA	NA	NA	NA	NA	0.93	1.04	0.96	0.99	0.82	0.83	0.977	0.0569	0.88	0.0954	0.373	0.785	0.042	0.232	-0.097	0.111	0.622
ONC0004262	CHINIOFON	Launched	antiprotozoal agent		infectious disease	amebiasis	1.08	0.96	0.96	0.82	0.89	1	1	0.0693	0.903	0.0907	0.461	0.831	0.0856	0.393	-0.097	0.111	0.622
ONC0004277	DIACETAMATE	Preclinical					1.11	1.05	1.06	1.12	0.85	0.96	1073	0.0321	0.977	0.136	0.728	0.942	0.406	0.902	-0.097	0.171	0.687
ONC0003026	caffeic-acid-phenethyl-ester	Preclinical	HIV integrase inhibitor	RELA			1.08	1.21	1.19	1.16	1.03	1	1.16	0.07	1063	0.085	0.925	1	0.864	1	-0.097	0.103	0.614
ONC0003394	Tiquizium bromide	NA	NA	NA	NA	NA	0.95	1.12	1.3	1.15	0.97	0.96	1123	0.175	1027	0.107	0.862	0.986	0.703	1	-0.097	0.234	0.744
ONC0003056	kenpaullone	Preclinical	CDK inhibitor|glycogen synthase kinase inhibitor	CCNB1|CDK1|CDK5|GSK3B			0.99	1	0.64	0.65	0.78	0.91	0.877	0.205	0.78	0.13	0.0991	0.464	0.000541	0.00491	-0.097	0.267	0.774
ONC0000739	ETHINYL ESTRADIOL	NA	NA	NA	NA	NA	0.93	1.03	1.17	1.19	0.64	1.01	1043	0.121	0.947	0.28	0.625	0.903	0.242	0.735	-0.097	0.313	0.822
ONC0000645	SULFAQUINOXALINE SODIUM	NA	NA	NA	NA	NA	1	1.06	1.15	0.99	0.79	1.14	1.07	0.0755	0.973	0.176	0.717	0.938	0.386	0.893	-0.097	0.226	0.737
ONC0000245	VUF10460	Preclinical	histamine receptor agonist	HRH4			1.09	1	0.99	0.83	0.96	1	1027	0.0551	0.93	0.0889	0.563	0.874	0.169	0.607	-0.097	0.0992	0.611
ONC0002286	Toceranib (phosphate)	NA	NA	NA	NA	NA	1.1	0.81	1.04	0.9	0.78	0.98	0.983	0.153	0.887	0.101	0.398	0.792	0.0521	0.274	-0.097	0.21	0.721
ONC0002432	CLOPERASTINE HYDROCHLORIDE	NA	NA	NA	NA	NA	0.96	1.17	0.87	0.76	0.9	1.05	1	0.154	0.903	0.145	0.461	0.831	0.0856	0.393	-0.097	0.237	0.747
ONC0002601	AS-1949490	Preclinical	SHIP2 phosphatase inhibitor	INPP5D			1	0.97	0.89	0.85	0.89	0.83	0.953	0.0569	0.857	0.0306	0.292	0.741	0.0184	0.118	-0.097	0.0395	0.471
ONC0002444	LOVASTATIN	Launched	HMGCR inhibitor	HDAC2|HMGCR|ITGAL|NR1I2	cardiology|endocrinology	coronary heart disease|myocardial infarction|hypercholesterolemia	0.99	1.18	1.12	0.98	1.05	0.97	1097	0.0971	1	0.0436	0.797	0.966	0.548	0.978	-0.097	0.111	0.622
ONC0001084	Fiacitabine	Phase 2	DNA synthesis inhibitor				0.99	1.2	1.04	0.99	0.91	1.04	1077	0.11	0.98	0.0656	0.739	0.947	0.426	0.919	-0.097	0.137	0.645
ONC0000405	DEXAMETHASONE ACETATE	NA	NA	NA	NA	NA	1.05	0.86	1.24	1.06	0.79	1.01	1.05	0.19	0.953	0.144	0.649	0.915	0.275	0.784	-0.097	0.262	0.771
ONC0001354	melatonin	Launched	melatonin receptor agonist|nitric oxide synthase inhibitor	ASMT|CALM1|CALR|EPX|ESR1|HTR2B|MPO|MTNR1A|MTNR1B|NQO2|RORB	neurology/psychiatry	sleep cycle support	1.26	1.6	0.86	1.18	1.02	1.23	1.24	0.37	1143	0.11	0.987	1	0.99	1	-0.097	0.351	0.85
ONC0001127	Efinaconazole	Launched	lanosterol demethylase inhibitor	CYP51A1	infectious disease	onychomycosis	1.23	1.14	0.89	1	0.98	0.99	1087	0.176	0.99	0.01	0.769	0.954	0.487	0.945	-0.097	0.221	0.732
ONC0001622	ANR-94	Preclinical	adenosine receptor antagonist	ADORA2A			0.98	1	1.15	0.84	1	1	1043	0.0929	0.947	0.0924	0.625	0.903	0.242	0.735	-0.097	0.135	0.642
ONC0001629	ifenprodil	Launched	adrenergic receptor antagonist|glutamate receptor antagonist	GRIN2B			1.25	0.92	1.01	0.97	1.04	0.88	1.06	0.171	0.963	0.0802	0.684	0.925	0.329	0.839	-0.097	0.222	0.732
ONC0000099	COR-170	Preclinical	cannabinoid receptor inverse agonist	CNR2			0.85	1.18	1.02	0.98	1	0.78	1017	0.165	0.92	0.122	0.525	0.861	0.133	0.526	-0.097	0.232	0.744
ONC0001248	Ro 28-1675	NA	NA	NA	NA	NA	0.99	1.16	1.16	1	0.99	1.03	1103	0.0981	1007	0.0208	0.815	0.972	0.588	0.993	-0.097	0.113	0.623
ONC0001411	4BP-TQS	Preclinical	nicotinic receptor agonist	CHRNA7			1.07	1.16	1.18	1.06	1.11	0.95	1137	0.0586	1.04	0.0819	0.888	0.995	0.769	1	-0.097	0.0895	0.602
ONC0002360	lidoflazine	Launched	calcium channel blocker	SCN1A|SCN3A|SLC29A1	cardiology	coronary artery disease (CAD)	1.02	0.98	0.93	0.8	0.88	0.96	0.977	0.0451	0.88	0.08	0.373	0.785	0.042	0.232	-0.097	0.0806	0.584
ONC0001413	RP67580	Preclinical					1.07	1.12	1.05	0.97	0.93	1.05	1.08	0.0361	0.983	0.0611	0.749	0.947	0.446	0.932	-0.097	0.0465	0.497
ONC0005460	aprindine	Launched	voltage-gated sodium channel blocker	CALM1|SCN5A	cardiology	cardiac arrythmia	0.99	1.12	1.08	1	0.95	0.95	1063	0.0666	0.967	0.0289	0.695	0.93	0.347	0.857	-0.097	0.0566	0.538
ONC0000477	MAFENIDE HYDROCHLORIDE	NA	NA	NA	NA	NA	1.25	0.99	1.06	1.03	0.94	1.04	1.1	0.135	1003	0.0551	0.806	0.968	0.568	0.985	-0.097	0.171	0.687
ONC0000471	PENICILLIN G POTASSIUM	NA	NA	NA	NA	NA	1.08	1.2	1.07	1.1	1.15	0.81	1117	0.0723	1.02	0.184	0.847	0.98	0.666	1	-0.097	0.233	0.744
ONC0000487	FURAZOLIDONE	Launched	bacterial DNA inhibitor		gastroenterology|infectious disease	diarrhea|enteritis|cholera	1.46	1.01	0.86	1.02	1.02	1	1.11	0.312	1013	0.0115	0.832	0.975	0.628	1	-0.097	0.323	0.83
ONC0003268	BENZETHONIUM CHLORIDE	NA	NA	NA	NA	NA	1.36	0.76	1.08	0.92	1.02	0.97	1067	0.3	0.97	0.05	0.707	0.935	0.366	0.877	-0.097	0.317	0.826
ONC0001856	AT-1015	Preclinical	serotonin receptor antagonist	HTR2A			1	1.12	1.18	0.98	1.08	0.95	1.1	0.0917	1003	0.0681	0.806	0.968	0.568	0.985	-0.097	0.111	0.622
ONC0000890	Tesevatinib	NA	NA	NA	NA	NA	0.71	0.7	0.84	0.71	0.91	0.34	0.75	0.0781	0.653	0.289	0.0061	0.0702	8.97e-08	1.15e-06	-0.097	0.313	0.822
ONC0000882	NH125	Preclinical	eukaryotic translation elongation factor 2 inhibitor				0.68	0.62	0.61	0.41	0.76	0.45	0.637	0.0379	0.54	0.192	0.00016	0.00311	1.64e-12	2.66e-11	-0.097	0.238	0.747
ONC0001710	Ro-60-0175 fumarate	NA	NA	NA	NA	NA	0.91	0.96	1.35	1.01	0.95	0.97	1073	0.241	0.977	0.0306	0.728	0.942	0.406	0.902	-0.097	0.28	0.789
ONC0001944	cadralazine	Launched	adrenergic receptor antagonist		cardiology	hypertension	0.95	0.95	1.17	0.97	0.99	0.82	1023	0.127	0.927	0.0929	0.55	0.868	0.157	0.579	-0.097	0.176	0.692
ONC0001755	GW-0742	Preclinical	PPAR receptor agonist	PPARD			1.41	0.99	1.05	0.91	1.09	1.16	1.15	0.227	1053	0.129	0.911	1	0.827	1	-0.097	0.282	0.792
ONC0001149	Crisaborole	Launched	phosphodiesterase inhibitor	PDE4A|PDE4B|PDE4C|PDE4D	dermatology	dermatitis	1.4	1.01	1.29	1.17	1.11	1.13	1233	0.201	1137	0.0306	0.984	1	0.987	1	-0.097	0.247	0.759
ONC0004697	ADL5859 HCl	NA	NA	NA	NA	NA	0.82	1.13	1	1.02	0.92	0.73	0.983	0.156	0.89	0.147	0.398	0.792	0.0578	0.295	-0.093	0.246	0.758
ONC0004498	CEP33779	Preclinical	JAK inhibitor	JAK2			0.84	1.2	1.16	0.84	1.04	1.04	1067	0.197	0.973	0.115	0.707	0.935	0.386	0.893	-0.093	0.264	0.772
ONC0004532	Ki16198	Preclinical	lipoprotein antagonist	LPA			0.96	1.11	1.25	0.99	1.09	0.96	1107	0.145	1013	0.0681	0.823	0.974	0.628	1	-0.093	0.196	0.706
ONC0003722	pyrvinium	NA	NA	NA	NA	NA	0.86	0.16	-0.04	0.18	0.16	0.36	0.327	0.473	0.233	0.11	2.3e-11	9.88e-10	7.2e-32	2.39e-30	-0.093	0.384	0.866
ONC0004174	ELLAGIC ACID	NA	NA	NA	NA	NA	1.24	1	1	0.78	0.98	1.2	1.08	0.139	0.987	0.21	0.749	0.947	0.466	0.944	-0.093	0.28	0.789
ONC0003580	NHI-2	Preclinical	lactate dehydrogenase inhibitor	LDHA			1.19	0.92	1.17	0.93	1.02	1.05	1093	0.15	1	0.0624	0.788	0.963	0.548	0.978	-0.093	0.201	0.71
ONC0004409	piclamilast	Phase 2	phosphodiesterase inhibitor	PDE4A|PDE4B|PDE4C|PDE4D			1.5	0.77	1.04	1.05	1	0.98	1103	0.369	1.01	0.0361	0.815	0.972	0.608	0.997	-0.093	0.352	0.85
ONC0003670	VANCOMYCIN HYDROCHLORIDE	NA	NA	NA	NA	NA	1.17	1.09	1.03	0.89	1.1	1.02	1097	0.0702	1003	0.106	0.797	0.966	0.568	0.985	-0.093	0.141	0.652
ONC0002472	1400W	Preclinical	nitric oxide synthase inhibitor	NOS1|NOS2|NOS3			1.01	1.06	1.04	0.99	1	0.84	1037	0.0252	0.943	0.0896	0.6	0.889	0.226	0.711	-0.093	0.104	0.614
ONC0003960	CLIOQUINOL	Withdrawn	chelating agent	OPRK1			1.18	0.98	1.01	1.01	1	0.88	1057	0.108	0.963	0.0723	0.673	0.923	0.329	0.839	-0.093	0.145	0.653
ONC0002496	TCS-21311	Preclinical	JAK inhibitor	JAK3			0.62	0.9	0.68	0.74	0.64	0.54	0.733	0.147	0.64	0.1	0.00383	0.0492	2.9e-08	3.84e-07	-0.093	0.211	0.721
ONC0002475	NNC-711	Preclinical	GABA uptake inhibitor	SIGMAR1|SLC6A1			0.82	1.3	0.99	1.13	1	0.7	1037	0.243	0.943	0.221	0.6	0.889	0.226	0.711	-0.093	0.324	0.83
ONC0002547	PF-4800567	Preclinical	casein kinase inhibitor	CSNK1D|CSNK1E			0.92	0.99	1.27	0.87	1	1.03	1.06	0.185	0.967	0.085	0.684	0.925	0.347	0.857	-0.093	0.245	0.756
ONC0002889	AMINOTHIAZOLE	Preclinical	cyclin D inhibitor	NOS2			1.15	1.39	0.79	1.07	1.01	0.97	1.11	0.302	1017	0.0503	0.832	0.975	0.647	1	-0.093	0.324	0.83
ONC0003381	MERBROMIN	Launched	antiseptic		infectious disease	first-aid antiseptic	1.08	1.07	1.12	0.88	1.07	1.04	1.09	0.0265	0.997	0.102	0.779	0.959	0.528	0.968	-0.093	0.125	0.632
ONC0002696	talmapimod	Phase 2	p38 MAPK inhibitor	IL1B|MAPK11|MAPK14|MT-CO2|TNF			0.97	0.98	0.84	0.9	0.93	0.68	0.93	0.0781	0.837	0.137	0.22	0.682	0.0083	0.0596	-0.093	0.188	0.705
ONC0002379	CLENBUTEROL HYDROCHLORIDE	NA	NA	NA	NA	NA	0.83	1.47	1.04	0.99	1.04	1.03	1113	0.326	1.02	0.0265	0.84	0.979	0.666	1	-0.093	0.335	0.839
ONC0002395	LINAGLIPTIN	Launched	dipeptidyl peptidase inhibitor	DPP4	endocrinology	diabetes mellitus	1.18	1.26	0.99	1.14	1.02	0.99	1143	0.139	1.05	0.0794	0.9	0.998	0.814	1	-0.093	0.191	0.705
ONC0001356	W-54011	Preclinical	anaphylatoxin chemotactic receptor antagonist	C5AR1			1.27	1.04	1.04	0.95	1.04	1.08	1117	0.133	1023	0.0666	0.847	0.98	0.684	1	-0.093	0.179	0.695
ONC0000380	KHS-101	Preclinical	neural stem cell inducer	TACC3			1	1	1.08	0.9	0.97	0.93	1027	0.0462	0.933	0.0351	0.563	0.874	0.182	0.63	-0.093	0.0268	0.401
ONC0001143	Calcipotriol	Launched	vitamin D receptor agonist	VDR	dermatology	psoriasis	0.96	0.83	1.04	0.82	0.7	1.03	0.943	0.106	0.85	0.167	0.26	0.717	0.0143	0.0945	-0.093	0.234	0.744
ONC0003507	AlosetronHCl	NA	NA	NA	NA	NA	1.11	0.96	1.01	1.05	0.97	0.78	1027	0.0764	0.933	0.139	0.563	0.874	0.182	0.63	-0.093	0.19	0.705
ONC0003509	L-Ergothioneine	Phase 3	free radical scavenger				0.92	1.19	1.08	1.07	0.93	0.91	1063	0.136	0.97	0.0872	0.695	0.93	0.366	0.877	-0.093	0.191	0.705
ONC0001644	GANT-61	Preclinical	GLI antagonist	GLI1|GLI2			1.03	1.12	1.09	0.97	0.93	1.06	1.08	0.0458	0.987	0.0666	0.749	0.947	0.466	0.944	-0.093	0.0625	0.552
ONC0000129	AIM-100	Preclinical	tyrosine kinase inhibitor	TNK2			1.26	1.01	0.79	0.95	0.98	0.85	1.02	0.235	0.927	0.0681	0.537	0.863	0.157	0.579	-0.093	0.284	0.795
ONC0005621	CEP-37440	Phase 1	ALK tyrosine kinase receptor inhibitor	ALK			0.98	0.92	0.97	0.81	0.92	0.86	0.957	0.0321	0.863	0.0551	0.303	0.751	0.0236	0.147	-0.093	0.0397	0.471
ONC0005526	zopolrestat	Phase 2		AKR1B1|AKR1B10			0.97	1.13	0.99	0.97	0.65	1.19	1.03	0.0872	0.937	0.272	0.575	0.879	0.196	0.658	-0.093	0.31	0.821
ONC0005486	pyridoxamine	Phase 3	AGE inhibitor				1.14	1.03	1.16	1	1.06	0.99	1.11	0.07	1017	0.0379	0.832	0.975	0.647	1	-0.093	0.0664	0.563
ONC0000831	RN-1734	Preclinical	TRPV antagonist	TRPV4			0.67	1.25	1.33	1	0.99	0.98	1083	0.36	0.99	0.01	0.759	0.95	0.487	0.945	-0.093	0.349	0.85
ONC0000065	SKF-96365	Preclinical	calcium channel blocker	CYP3A4|PKD2|TRPC1|TRPC3|TRPC4|TRPC5|TRPV2			0.81	1.27	0.87	0.75	0.99	0.93	0.983	0.25	0.89	0.125	0.398	0.792	0.0578	0.295	-0.093	0.302	0.815
ONC0002080	Grazoprevir	Launched	HCV inhibitor		infectious disease	hepatitis C	1.02	0.73	1.56	1.02	1	1.01	1103	0.421	1.01	0.01	0.815	0.972	0.608	0.997	-0.093	0.369	0.852
ONC0000046	NAV-26	Preclinical	voltage-gated sodium channel blocker	SCN9A			1.06	1.35	1.11	1.1	1.1	1.04	1173	0.155	1.08	0.0346	0.942	1	0.912	1	-0.093	0.204	0.71
ONC0002026	Vicriviroc (maleate)	NA	NA	NA	NA	NA	1.05	1.1	1.19	1.14	1.03	0.89	1113	0.0709	1.02	0.125	0.84	0.979	0.666	1	-0.093	0.17	0.687
ONC0001863	eletriptan	Launched	serotonin receptor agonist	HTR1A|HTR1B|HTR1D|HTR1E|HTR1F|HTR2B|HTR7	neurology/psychiatry	migraine headache	0.99	1.12	0.95	0.92	0.96	0.9	1.02	0.0889	0.927	0.0306	0.537	0.863	0.157	0.579	-0.093	0.102	0.614
ONC0005290	HYMECHROME	NA	NA	NA	NA	NA	1	1.35	1.18	1.11	1.15	0.99	1177	0.175	1083	0.0833	0.946	1	0.92	1	-0.093	0.234	0.744
ONC0001180	FK 3311	NA	NA	NA	NA	NA	0.94	1.07	1.07	0.98	0.87	0.95	1027	0.0751	0.933	0.0569	0.563	0.874	0.182	0.63	-0.093	0.0832	0.587
ONC0002120	clobetasol-propionate	Launched	glucocorticoid receptor agonist	NR3C1|PLA2G1B	dermatology	corticosteroid-responsive dermatoses	1	0.83	1.12	0.87	0.89	0.92	0.983	0.146	0.893	0.0252	0.398	0.792	0.064	0.318	-0.09	0.199	0.708
ONC0004676	ABT-888 (Veliparib)	NA	NA	NA	NA	NA	0.87	1.09	0.99	0.85	1.01	0.82	0.983	0.11	0.893	0.102	0.398	0.792	0.064	0.318	-0.09	0.179	0.695
ONC0004053	GLUTATHIONE	Phase 3	antioxidant	ESD|GGT1|GLO1|GLRX|GLRX2|GPX1|GPX2|GPX3|GPX4|GPX5|GPX6|GPX7|GPX8|GSR|GSS|GSTA1|GSTA2|GSTA3|GSTA4|GSTA5|GSTK1|GSTM1|GSTM2|GSTM3|GSTM4|GSTM5|GSTO1|GSTO2|GSTP1|GSTT1|GSTZ1|HAGH|HPGDS|LTC4S|MGST1|MGST2|MGST3|TXNDC12			0.8	1.04	1.04	0.87	0.97	0.77	0.96	0.139	0.87	0.1	0.314	0.758	0.0299	0.177	-0.09	0.209	0.719
ONC0003714	succinic acid	NA	NA	NA	NA	NA	1.17	1.14	1.06	0.98	1.05	1.07	1123	0.0569	1033	0.0473	0.862	0.986	0.737	1	-0.09	0.0525	0.523
ONC0003702	8-cyano-1-cyclopropyl-6-fluoro-7-((4aS,7aS)-hexahydropyrrolo[3,4-b][1,4]oxazin-6(2H)-yl)-4-oxo-1,4-dihydroquinoline-3-carboxylic acid	NA	NA	NA	NA	NA	1.33	0.75	1.26	1.07	0.87	1.13	1113	0.317	1023	0.136	0.84	0.979	0.684	1	-0.09	0.342	0.847
ONC0004190	RANOLAZINE DIHYDROCHLORIDE	NA	NA	NA	NA	NA	0.77	1.13	1.05	0.98	0.93	0.77	0.983	0.189	0.893	0.11	0.398	0.792	0.064	0.318	-0.09	0.262	0.771
ONC0003735	oxypurinol	Phase 2/Phase 3	xanthine oxidase inhibitor	XDH			1.46	0.76	0.83	0.92	0.93	0.93	1017	0.386	0.927	0.00577	0.525	0.861	0.157	0.579	-0.09	0.363	0.85
ONC0004353	Tetrandrine (Fanchinine)	NA	NA	NA	NA	NA	1.01	1.11	1.19	1.05	0.98	1.01	1103	0.0902	1013	0.0351	0.815	0.972	0.628	1	-0.09	0.11	0.622
ONC0004023	SUCRALFATE [5mM]	NA	NA	NA	NA	NA	1.1	1.15	1.16	0.98	1.07	1.09	1137	0.0321	1047	0.0586	0.888	0.995	0.799	1	-0.09	0.0495	0.51
ONC0004899	Conivaptan HCl (Vaprisol)	NA	NA	NA	NA	NA	1.07	1.28	1.14	1	1.1	1.12	1163	0.107	1073	0.0643	0.93	1	0.894	1	-0.09	0.147	0.653
ONC0004968	Puerarin (Kakonein)	NA	NA	NA	NA	NA	1.22	0.78	1.16	1.03	0.83	1.03	1053	0.239	0.963	0.115	0.661	0.916	0.329	0.839	-0.09	0.3	0.813
ONC0004642	Clorprenaline HCL	NA	NA	NA	NA	NA	1.2	0.98	0.98	0.92	0.98	0.99	1053	0.127	0.963	0.0379	0.661	0.916	0.329	0.839	-0.09	0.172	0.687
ONC0005091	KX2-391	Phase 3	SRC inhibitor|tubulin polymerization inhibitor	SRC			0.25	0.24	0.31	0.13	0.19	0.21	0.267	0.0379	0.177	0.0416	4e-13	2.14e-11	1.7e-36	7.46e-35	-0.09	0.0254	0.397
ONC0003868	pimonidazole	Phase 3					0.95	1.32	1.01	1.02	0.99	1	1093	0.199	1003	0.0153	0.788	0.963	0.568	0.985	-0.09	0.257	0.766
ONC0003612	L-Quisqualic-acid	Preclinical	glutamate receptor agonist	FOLH1|GRIA2|GRIK1|GRIK2|GRM1|GRM2|GRM3|GRM5|GRM7|GRM8			1.17	1.03	0.98	0.99	0.92	1	1.06	0.0985	0.97	0.0436	0.684	0.925	0.366	0.877	-0.09	0.126	0.632
ONC0005141	LDN-212854	Preclinical	bone morphogenic protein inhibitor	ABL1|ACVR1|RIPK2			1.02	1.29	0.95	1.05	0.99	0.95	1087	0.18	0.997	0.0503	0.769	0.954	0.528	0.968	-0.09	0.24	0.749
ONC0005155	Nexturastat A	NA	NA	NA	NA	NA	0.83	1.27	1.53	1.18	1.01	1.17	1.21	0.354	1.12	0.0954	0.973	1	0.976	1	-0.09	0.354	0.85
ONC0003808	PHENOLSULFONPHTHALEIN	Launched					1.1	1.17	0.97	1.01	1.02	0.94	1.08	0.101	0.99	0.0436	0.749	0.947	0.487	0.945	-0.09	0.131	0.633
ONC0003835	zeatin	Phase 1					1.16	0.5	1.13	0.63	0.97	0.92	0.93	0.373	0.84	0.184	0.22	0.682	0.00954	0.0666	-0.09	0.367	0.852
ONC0003858	thiothixene	Launched	dopamine receptor antagonist	DRD1|DRD2|HRH1|HTR2A	neurology/psychiatry	schizophrenia	1.04	1.15	0.97	0.96	1.03	0.9	1053	0.0907	0.963	0.0651	0.661	0.916	0.329	0.839	-0.09	0.121	0.63
ONC0003876	Lobenzarit disodium	NA	NA	NA	NA	NA	0.98	1.19	1.07	1.01	0.95	1.01	1.08	0.105	0.99	0.0346	0.749	0.947	0.487	0.945	-0.09	0.137	0.644
ONC0004267	WB-4101	Preclinical	adrenergic receptor antagonist	ADRA1A|ADRA1B|ADRA1D|ADRA2A|ADRA2B|ADRA2C|HTR1A			1.09	1.14	0.97	1	1.04	0.89	1067	0.0874	0.977	0.0777	0.707	0.935	0.406	0.902	-0.09	0.127	0.632
ONC0003887	1,3-Bis[4-(7-chloro-4-quinolinyl)-1-piperazinyl]propane tetraphosphate tetrahydrate	NA	NA	NA	NA	NA	1.04	1.14	0.98	0.96	1	0.93	1053	0.0808	0.963	0.0351	0.661	0.916	0.329	0.839	-0.09	0.0921	0.606
ONC0003886	DOMPERIDONE	Launched	dopamine receptor antagonist	DRD2|DRD3	infectious disease	fescue toxicosis	1.04	1.17	1.02	0.96	1	1	1077	0.0814	0.987	0.0231	0.739	0.947	0.466	0.944	-0.09	0.0946	0.607
ONC0004257	GW-441756	Preclinical	growth factor receptor inhibitor	NTRK1			0.81	1.02	0.97	0.88	0.77	0.88	0.933	0.11	0.843	0.0635	0.229	0.688	0.0109	0.0753	-0.09	0.151	0.663
ONC0003954	OXCARBAZEPINE	Launched	sodium channel blocker	SCN10A|SCN11A|SCN1A|SCN2A|SCN3A|SCN4A|SCN5A|SCN7A|SCN8A|SCN9A	neurology/psychiatry	seizures	1.29	1.07	0.94	1.02	1	1.01	1.1	0.177	1.01	0.01	0.806	0.968	0.608	0.997	-0.09	0.236	0.746
ONC0003413	QUINACRINE HYDROCHLORIDE	NA	NA	NA	NA	NA	0.97	0.77	0.83	0.6	0.77	0.93	0.857	0.103	0.767	0.165	0.0696	0.388	0.000257	0.00241	-0.09	0.238	0.747
ONC0003354	Esomeprazole magnesium trihydrate	NA	NA	NA	NA	NA	1.01	0.9	1.01	1.02	0.67	0.96	0.973	0.0635	0.883	0.187	0.361	0.778	0.0468	0.252	-0.09	0.25	0.76
ONC0003036	U-18666A	Preclinical	oxidosqualene cyclase inhibitor				0.93	1.13	1.02	1.03	0.75	1.03	1027	0.1	0.937	0.162	0.563	0.874	0.196	0.658	-0.09	0.233	0.744
ONC0000241	AMG-548	Phase 1	MAP kinase inhibitor	MAPK11|MAPK12|MAPK13|MAPK14			0.94	0.96	1	0.9	0.87	0.86	0.967	0.0306	0.877	0.0208	0.337	0.769	0.0376	0.214	-0.09	0.00878	0.293
ONC0002655	fananserin	Phase 2	dopamine receptor antagonist|serotonin receptor antagonist	HTR2A			0.96	0.99	1.27	0.76	1.07	1.12	1073	0.171	0.983	0.195	0.728	0.942	0.446	0.932	-0.09	0.29	0.803
ONC0000627	DISULFIRAM	Launched	aldehyde dehydrogenase inhibitor|DNA methyltransferase inhibitor|TRPV agonist	ALDH2|DBH	neurology/psychiatry	abstinence from alcohol	0.31	0.14	-0.07	-0.02	0.05	0.08	0.127	0.19	0.037	0.0513	8.72e-18	9.27e-16	2.43e-49	2.91e-47	-0.09	0.251	0.76
ONC0002218	Larotrectinib sulfate	NA	NA	NA	NA	NA	1.19	1.09	0.96	1	1	0.97	1.08	0.115	0.99	0.0173	0.749	0.947	0.487	0.945	-0.09	0.154	0.664
ONC0002397	Nitisinone	Launched	hydroxyphenylpyruvate dioxygenase inhibitor		metabolism	tyrosinemia	1.05	1.1	1.19	1	1.02	1.05	1113	0.0709	1023	0.0252	0.84	0.979	0.684	1	-0.09	0.0742	0.58
ONC0001067	TEPP-46	Preclinical	pyruvate kinase isozyme activator	PKM			0.98	1	0.98	0.89	0.79	1.01	0.987	0.0115	0.897	0.11	0.41	0.805	0.0706	0.343	-0.09	0.146	0.653
ONC0000399	LEUCOVORIN CALCIUM	NA	NA	NA	NA	NA	1.17	1.19	1.01	0.99	1.02	1.09	1123	0.0987	1033	0.0513	0.862	0.986	0.737	1	-0.09	0.128	0.632
ONC0003440	Linoleoyl GABA	NA	NA	NA	NA	NA	1.33	0.99	1.06	0.99	1.05	1.07	1127	0.18	1037	0.0416	0.869	0.988	0.754	1	-0.09	0.24	0.748
ONC0000150	ITD-1	Preclinical	TGF beta receptor inhibitor	TGFBR2			1	0.96	1.23	1.06	0.86	1	1063	0.146	0.973	0.103	0.695	0.93	0.386	0.893	-0.09	0.218	0.727
ONC0005629	HA-1004HCl	NA	NA	NA	NA	NA	0.93	1.05	0.84	0.77	1.01	0.77	0.94	0.105	0.85	0.139	0.249	0.706	0.0143	0.0945	-0.09	0.212	0.724
ONC0005483	gamma-AMINOBUTYRIC ACID HYDROCHLORIDE	NA	NA	NA	NA	NA	1.44	1.05	0.74	1.09	0.96	0.91	1077	0.351	0.987	0.0929	0.739	0.947	0.466	0.944	-0.09	0.352	0.85
ONC0005555	meclinertant	Phase 2/Phase 3	neurotensin receptor antagonist	NTSR1|NTSR2			1.23	0.96	1.05	0.97	0.98	1.02	1.08	0.137	0.99	0.0265	0.749	0.947	0.487	0.945	-0.09	0.187	0.705
ONC0005527	guanidinopropionic-acid	Phase 2	creatine kinase inhibitor	CKM			1.34	0.83	1.03	0.78	1.05	1.1	1067	0.257	0.977	0.172	0.707	0.935	0.406	0.902	-0.09	0.322	0.83
ONC0003194	FLUMEQUINE	Launched	topoisomerase inhibitor		infectious disease	urinary tract infections	1.06	1.14	1.1	0.85	1.12	1.06	1.1	0.04	1.01	0.142	0.806	0.968	0.608	0.997	-0.09	0.194	0.706
ONC0000464	DIHYDROSTREPTOMYCIN SESQUISULFATE [5mM/10% aq DMSO]	NA	NA	NA	NA	NA	1	1.18	0.94	0.95	0.99	0.91	1.04	0.125	0.95	0.04	0.613	0.897	0.258	0.761	-0.09	0.169	0.687
ONC0003090	CLOFOCTOL	Launched	protein synthesis inhibitor		infectious disease	gram-positive bacterial infections	1.14	0.84	1.06	1.01	0.96	0.8	1013	0.155	0.923	0.11	0.512	0.856	0.145	0.552	-0.09	0.232	0.744
ONC0000579	OXYPHENBUTAZONE	Withdrawn	cyclooxygenase inhibitor				1.04	1.01	1.14	0.88	0.98	1.06	1063	0.0681	0.973	0.0902	0.695	0.93	0.386	0.893	-0.09	0.122	0.63
ONC0003326	HYDRASTININE HYDROCHLORIDE	NA	NA	NA	NA	NA	1.2	1.03	1.04	0.99	1	1.01	1.09	0.0954	1	0.01	0.779	0.959	0.548	0.978	-0.09	0.121	0.63
ONC0001893	Dyclonine (hydrochloride)	NA	NA	NA	NA	NA	1.36	0.93	1	1.13	1.03	0.86	1097	0.231	1007	0.137	0.797	0.966	0.588	0.993	-0.09	0.299	0.813
ONC0000952	AVN-944	Phase 2	inosine monophosphate dehydrogenase inhibitor	IMPDH1|IMPDH2			0.36	0.36	0.43	0.37	0.16	0.35	0.383	0.0404	0.293	0.116	7.82e-10	2.82e-08	2.51e-27	6.93e-26	-0.09	0.155	0.665
ONC0001932	BAY-41-2272	Preclinical	guanylyl cyclase activator	GUCY1A3|GUCY1B3			0.93	0.91	1	0.82	0.98	0.77	0.947	0.0473	0.857	0.11	0.27	0.728	0.0184	0.118	-0.09	0.146	0.653
ONC0005336	TIOPRONIN	Launched	chelating agent|reducing agent		urology	kidney stones	1.13	1.01	0.94	0.92	0.88	1.01	1027	0.0961	0.937	0.0666	0.563	0.874	0.196	0.658	-0.09	0.131	0.633
ONC0001210	Etifoxine (hydrochloride)	NA	NA	NA	NA	NA	1.05	1.15	1.04	0.9	1.04	1.03	1.08	0.0608	0.99	0.0781	0.749	0.947	0.487	0.945	-0.09	0.0973	0.611
ONC0004565	Ropivacaine HCl	NA	NA	NA	NA	NA	0.85	1.16	0.96	0.69	1.09	0.93	0.99	0.157	0.903	0.201	0.423	0.811	0.0856	0.393	-0.087	0.295	0.808
ONC0004559	GDC-0994	Phase 1	MAP kinase inhibitor	MAPK1|MAPK3			1	0.99	0.99	0.69	0.98	1.05	0.993	0.00577	0.907	0.191	0.435	0.817	0.0939	0.419	-0.087	0.257	0.766
ONC0004350	Cilengitide trifluoroacetate	NA	NA	NA	NA	NA	1.26	1.24	1.18	1.14	1.15	1.13	1227	0.0416	1.14	0.01	0.981	1	0.989	1	-0.087	0.031	0.418
ONC0003725	SEP-227900	Phase 1	D-amino acid oxidase Inhibitor	DAO			0.87	1.31	1.06	0.99	0.89	1.1	1.08	0.221	0.993	0.105	0.749	0.947	0.507	0.957	-0.087	0.292	0.804
ONC0004341	Torcetrapib (CP-529414)	NA	NA	NA	NA	NA	0.53	1.41	1.31	1.07	0.97	0.95	1083	0.482	0.997	0.0643	0.759	0.95	0.528	0.968	-0.087	0.393	0.875
ONC0003994	PRASTERONE	NA	NA	NA	NA	NA	0.86	1.06	1.43	1.02	1	1.07	1117	0.289	1.03	0.0361	0.847	0.98	0.72	1	-0.087	0.328	0.836
ONC0004889	Zibotentan (ZD4054)	NA	NA	NA	NA	NA	0.97	0.73	1.12	0.99	0.84	0.73	0.94	0.197	0.853	0.131	0.249	0.706	0.0162	0.106	-0.087	0.282	0.792
ONC0004900	CGS 21680 HCl	NA	NA	NA	NA	NA	1.01	0.97	1.37	1.09	0.99	1.01	1117	0.22	1.03	0.0529	0.847	0.98	0.72	1	-0.087	0.285	0.796
ONC0003924	ETIDRONATE DISODIUM	NA	NA	NA	NA	NA	0.92	1.23	0.88	1.01	0.9	0.86	1.01	0.192	0.923	0.0777	0.499	0.851	0.145	0.552	-0.087	0.263	0.772
ONC0002826	Tiracizine	Withdrawn	sodium channel blocker	SCN5A			1.24	1.01	1.07	1	1.08	0.98	1107	0.119	1.02	0.0529	0.823	0.974	0.666	1	-0.087	0.17	0.687
ONC0003079	4-IBP	Preclinical	sigma receptor agonist	SIGMAR1			0.99	1.1	0.88	0.9	0.91	0.9	0.99	0.11	0.903	0.00577	0.423	0.811	0.0856	0.393	-0.087	0.153	0.664
ONC0003359	PENTAMIDINE ISETHIONATE	NA	NA	NA	NA	NA	0.83	1	1.17	0.88	0.93	0.93	1	0.17	0.913	0.0289	0.461	0.831	0.112	0.472	-0.087	0.236	0.746
ONC0001358	Talarozole	Phase 2	cytochrome P450 inhibitor	CYP26A1			1.17	0.96	1.17	1.11	1.04	0.89	1.1	0.121	1013	0.112	0.806	0.968	0.628	1	-0.087	0.208	0.718
ONC0003446	fenoverine	Launched	acetylcholine receptor antagonist		neurology/psychiatry	spasms	1.11	0.96	1.17	0.92	1.02	1.04	1.08	0.108	0.993	0.0643	0.749	0.947	0.507	0.957	-0.087	0.156	0.667
ONC0001624	alpha-methylhistamine-dihydrobromide-(S)-(+)	Preclinical	histamine receptor agonist	HRH3			1.12	1.31	0.86	0.99	1.04	1	1097	0.226	1.01	0.0265	0.797	0.966	0.608	0.997	-0.087	0.288	0.8
ONC0001245	FPS-ZM1	Preclinical	RAGE receptor antagonist	AGER			0.76	1.07	1.3	0.97	0.96	0.94	1043	0.271	0.957	0.0153	0.625	0.903	0.292	0.806	-0.087	0.318	0.826
ONC0001239	nafadotride	Preclinical	dopamine receptor antagonist	DRD2|DRD3|HTR1A			1.13	0.83	0.98	1.08	0.83	0.77	0.98	0.15	0.893	0.164	0.385	0.789	0.064	0.318	-0.087	0.269	0.776
ONC0001576	UB-165	Preclinical	acetylcholine receptor agonist	CHRNA3|CHRNA4|CHRNB2			0.84	1.11	1.11	0.8	1.03	0.97	1.02	0.156	0.933	0.119	0.537	0.863	0.182	0.63	-0.087	0.245	0.757
ONC0003173	URSODIOL	Launched	nuclear factor erythroid derived|like (NRF2) activator	AKR1C2|NR1H4	gastroenterology	gallstones	1.03	1	0.94	1.07	0.91	0.73	0.99	0.0458	0.903	0.17	0.423	0.811	0.0856	0.393	-0.087	0.237	0.747
ONC0003182	FLUTAMIDE	Launched	androgen receptor antagonist	AHR|AR	oncology	prostate cancer	0.9	1.1	1.01	1	1	0.75	1003	0.1	0.917	0.144	0.473	0.837	0.122	0.499	-0.087	0.223	0.734
ONC0000536	SULFADIAZINE	Launched	bacterial antifolate		infectious disease|ophthalmology	malaria|meningitis|urinary tract infections|conjunctivitis|trachoma|chancroid	0.68	1.38	1.28	1.04	1.04	1	1113	0.379	1027	0.0231	0.84	0.979	0.703	1	-0.087	0.365	0.852
ONC0000483	ABACAVIR SULFATE	NA	NA	NA	NA	NA	1.16	1.14	0.98	0.97	1.06	0.99	1093	0.0987	1007	0.0473	0.788	0.963	0.588	0.993	-0.087	0.134	0.639
ONC0000554	HYDROXYPROGESTERONE CAPROATE	NA	NA	NA	NA	NA	0.91	1.2	0.98	1.04	0.86	0.93	1.03	0.151	0.943	0.0907	0.575	0.879	0.226	0.711	-0.087	0.226	0.737
ONC0000586	DICLOFENAC SODIUM	NA	NA	NA	NA	NA	0.94	1.12	1.12	0.95	1.04	0.93	1.06	0.104	0.973	0.0586	0.684	0.925	0.386	0.893	-0.087	0.147	0.653
ONC0000520	HETACILLIN POTASSIUM	NA	NA	NA	NA	NA	1.39	0.76	0.97	0.89	1	0.97	1.04	0.321	0.953	0.0569	0.613	0.897	0.275	0.784	-0.087	0.344	0.848
ONC0003342	Fosphenytoin disodium salt hydrate	NA	NA	NA	NA	NA	1.21	1.04	1.03	1.13	0.96	0.93	1093	0.101	1007	0.108	0.788	0.963	0.588	0.993	-0.087	0.184	0.703
ONC0003337	SANGUINARIUM CHLORIDE	NA	NA	NA	NA	NA	0.98	1.01	0.96	0.81	1	0.88	0.983	0.0252	0.897	0.0961	0.398	0.792	0.0706	0.343	-0.087	0.128	0.632
ONC0002097	DMP 777	NA	NA	NA	NA	NA	1.22	1.12	0.98	1	0.93	1.13	1107	0.121	1.02	0.101	0.823	0.974	0.666	1	-0.087	0.198	0.708
ONC0000981	Umeclidinium (bromide)	NA	NA	NA	NA	NA	1.17	1.1	1.16	1.09	1.11	0.97	1143	0.0379	1057	0.0757	0.9	0.998	0.84	1	-0.087	0.0881	0.597
ONC0001869	Resiquimod	Phase 3	toll-like receptor agonist	TLR7|TLR8			0.99	0.97	1.03	0.99	0.97	0.77	0.997	0.0306	0.91	0.122	0.448	0.825	0.103	0.446	-0.087	0.171	0.687
ONC0001952	PF-03049423	Phase 2	phosphodiesterase inhibitor	PDE5A			1.05	1.21	0.75	0.87	0.97	0.91	1003	0.234	0.917	0.0503	0.473	0.837	0.122	0.499	-0.087	0.295	0.808
ONC0001787	Amineptine	Withdrawn	dopamine receptor agonist	SLC6A2|SLC6A4			0.98	1.13	1.02	0.82	1.01	1.04	1043	0.0777	0.957	0.119	0.625	0.903	0.292	0.806	-0.087	0.18	0.696
ONC0001799	NVP-TNKS656	Preclinical	tankyrase inhibitor	TNKS2			0.74	1.28	1.11	0.7	1.07	1.1	1043	0.276	0.957	0.223	0.625	0.903	0.292	0.806	-0.087	0.347	0.85
ONC0002907	methiazole	Preclinical	anthelmintic agent				0.75	0.46	1	0.64	0.75	0.56	0.737	0.27	0.65	0.0954	0.00421	0.0528	6.79e-08	8.83e-07	-0.087	0.322	0.83
ONC0004745	Matrine ((+)-Matrine)	NA	NA	NA	NA	NA	0.84	1.21	1.27	1	1.05	1.02	1107	0.233	1023	0.0252	0.823	0.974	0.684	1	-0.083	0.3	0.813
ONC0004831	Otilonium Bromide	NA	NA	NA	NA	NA	1.05	0.78	1.19	1.01	0.99	0.77	1007	0.208	0.923	0.133	0.486	0.843	0.145	0.552	-0.083	0.298	0.812
ONC0002155	cloranolol	Launched	adrenergic receptor antagonist	ADRB1|ADRB2|ADRB3	cardiology	hypertension	1.12	1.03	0.75	0.94	0.97	0.74	0.967	0.193	0.883	0.125	0.337	0.769	0.0468	0.252	-0.083	0.285	0.796
ONC0004719	OSI-906 (Linsitinib)	NA	NA	NA	NA	NA	0.84	0.93	0.9	0.74	0.74	0.94	0.89	0.0458	0.807	0.115	0.123	0.519	0.00214	0.0177	-0.083	0.17	0.687
ONC0002166	benzofenac	Phase 1					1.19	1.14	1.02	1.13	1.01	0.96	1117	0.0874	1033	0.0874	0.847	0.98	0.737	1	-0.083	0.154	0.664
ONC0004730	HA14-1	Preclinical	BCL inhibitor	BCL2			1.48	0.93	1.1	1	1.18	1.08	1.17	0.282	1087	0.0902	0.938	1	0.927	1	-0.083	0.333	0.839
ONC0004067	Alpidem	Withdrawn	benzodiazepine receptor agonist	GABRA1			0.95	0.91	1.08	0.6	0.99	1.1	0.98	0.0889	0.897	0.263	0.385	0.789	0.0706	0.343	-0.083	0.323	0.83
ONC0003711	1-(2-chloro-5-methylphenoxy)-3-(isopropylamino)-2-propanol	Preclinical					1.09	1.17	0.91	0.98	1.03	0.91	1057	0.133	0.973	0.0603	0.673	0.923	0.386	0.893	-0.083	0.201	0.71
ONC0003771	acexamic-acid	Launched	5 alpha reductase inhibitor	GAST	dermatology	wound healing	1.02	1.02	0.97	0.88	0.85	1.03	1003	0.0289	0.92	0.0964	0.473	0.837	0.133	0.526	-0.083	0.135	0.642
ONC0003762	fanetizole	Phase 3	neutrophil superoxide production				1.06	0.94	1.1	0.9	1.03	0.92	1033	0.0833	0.95	0.07	0.588	0.885	0.258	0.761	-0.083	0.129	0.632
ONC0003966	DENATONIUM BENZOATE	NA	NA	NA	NA	NA	0.96	1.44	0.89	1.05	1.01	0.98	1097	0.299	1013	0.0351	0.797	0.966	0.628	1	-0.083	0.339	0.844
ONC0004587	lixivaptan	Phase 3	vasopressin receptor antagonist	AVPR2			1.28	0.97	0.98	0.93	1	1.05	1077	0.176	0.993	0.0603	0.739	0.947	0.507	0.957	-0.083	0.253	0.76
ONC0005070	ML167	Preclinical	CLK inhibitor|DYRK inhibitor	CLK4|DYRK1B			1.1	1.07	1.07	0.99	1	1	1.08	0.0173	0.997	0.00577	0.749	0.947	0.528	0.968	-0.083	0.00427	0.235
ONC0003691	5,6-dihydro-5-aza-2'-deoxycytidine	NA	NA	NA	NA	NA	1.25	0.98	1.02	0.92	0.98	1.1	1083	0.146	1	0.0917	0.759	0.95	0.548	0.978	-0.083	0.229	0.74
ONC0004275	IRBESARTAN	Launched	angiotensin receptor antagonist	AGTR1|JUN|SLC10A1	cardiology|nephrology	hypertension|diabetic nephropathy	1.4	0.76	1.14	0.9	0.92	1.23	1.1	0.322	1017	0.185	0.806	0.968	0.647	1	-0.083	0.361	0.85
ONC0003425	VINCAMINE	Withdrawn	adrenergic receptor antagonist	CHRM1|CHRM2|CHRM3|CHRM4			0.96	1.05	1.12	0.99	0.91	0.98	1043	0.0802	0.96	0.0436	0.625	0.903	0.31	0.826	-0.083	0.105	0.616
ONC0003408	dexloxiglumide	Phase 3	CCK receptor antagonist	CCKAR			1.05	1.13	1.15	0.96	1.11	1.01	1.11	0.0529	1027	0.0764	0.832	0.975	0.703	1	-0.083	0.102	0.614
ONC0000730	CHLORAMBUCIL	Launched	DNA inhibitor		hematologic malignancy	chronic lymphocytic leukemia (CLL)|Hodgkin's lymphoma	1.11	0.98	1.07	1	0.93	0.98	1053	0.0666	0.97	0.0361	0.661	0.916	0.366	0.877	-0.083	0.0751	0.58
ONC0002426	RIBAVIRIN	Launched	antiviral	ADK|ENPP1|IMPDH1|IMPDH2|NT5C2	infectious disease	hepatitis C	1.14	1.03	1.27	0.94	1.1	1.15	1147	0.12	1063	0.11	0.906	1	0.864	1	-0.083	0.213	0.724
ONC0002410	BROMPHENIRAMINE MALEATE	NA	NA	NA	NA	NA	0.84	1.07	1.1	1.02	0.99	0.75	1003	0.142	0.92	0.148	0.473	0.837	0.133	0.526	-0.083	0.26	0.769
ONC0002392	FORMESTANE	Launched	aromatase inhibitor	CYP19A1	oncology	breast cancer	1.08	1.23	0.95	1.07	0.97	0.97	1087	0.14	1003	0.0577	0.769	0.954	0.568	0.985	-0.083	0.21	0.72
ONC0002237	Marimastat	Phase 3	matrix metalloprotease inhibitor	MMP1|MMP10|MMP11|MMP12|MMP13|MMP14|MMP15|MMP16|MMP17|MMP19|MMP2|MMP20|MMP21|MMP23A|MMP24|MMP25|MMP26|MMP27|MMP28|MMP3|MMP7|MMP8|MMP9			1.12	0.98	1.09	0.96	0.92	1.06	1063	0.0737	0.98	0.0721	0.695	0.93	0.426	0.919	-0.083	0.117	0.63
ONC0002607	3-carboxy-4-hydroxyphenylglycine-(S)	Preclinical	glutamate receptor antagonist	GRM1|GRM5			1.02	1.04	0.92	1.04	0.79	0.9	0.993	0.0643	0.91	0.125	0.435	0.817	0.103	0.446	-0.083	0.191	0.705
ONC0001328	BMS-309403	Preclinical	fatty acid binding protein inhibitor	FABP4			1.08	1.35	0.95	0.91	1.07	1.15	1127	0.204	1043	0.122	0.869	0.988	0.785	1	-0.083	0.292	0.804
ONC0000281	CINOXACIN	Launched	topoisomerase inhibitor		infectious disease	urinary tract infections	1.2	1.01	1.13	1.05	0.9	1.14	1113	0.0961	1.03	0.121	0.84	0.979	0.72	1	-0.083	0.203	0.71
ONC0000347	CLEMASTINE FUMARATE	NA	NA	NA	NA	NA	0.99	1.09	1.09	1.03	0.98	0.91	1057	0.0577	0.973	0.0603	0.673	0.923	0.386	0.893	-0.083	0.0795	0.583
ONC0001641	nisoxetine	Phase 1	norepinephrine reuptake inhibitor	SLC6A2|SLC6A3|SLC6A4			1.13	0.98	1.13	1	0.98	1.01	1.08	0.0866	0.997	0.0153	0.749	0.947	0.528	0.968	-0.083	0.118	0.63
ONC0000333	N-benzylnaltrindole	Preclinical	opioid receptor antagonist				0.98	1.14	1.02	0.98	0.93	0.98	1047	0.0833	0.963	0.0289	0.637	0.909	0.329	0.839	-0.083	0.109	0.622
ONC0000168	ICI-192605	Phase 2	thromboxane receptor antagonist	TBXA2R			1.1	0.93	1.18	1.01	0.9	1.05	1.07	0.128	0.987	0.0777	0.717	0.938	0.466	0.944	-0.083	0.2	0.71
ONC0002325	acefylline	Launched	adenosine receptor agonist	ADORA1	pulmonary	asthma	0.79	0.96	1.45	1.08	0.99	0.88	1067	0.343	0.983	0.1	0.707	0.935	0.446	0.932	-0.083	0.36	0.85
ONC0001300	Alvimopan (monohydrate)	NA	NA	NA	NA	NA	1.21	1.35	0.86	1.09	1.04	1.04	1.14	0.252	1057	0.0289	0.894	0.998	0.84	1	-0.083	0.313	0.822
ONC0001428	GR-144053	Preclinical	integrin antagonist	ITGA2B|ITGB3			0.88	1.15	1.13	0.96	0.96	0.99	1053	0.15	0.97	0.0173	0.661	0.916	0.366	0.877	-0.083	0.219	0.729
ONC0005524	TNP-470	Phase 2	methionine aminopeptidase inhibitor	METAP2			0.83	0.65	0.73	0.74	0.7	0.52	0.737	0.0902	0.653	0.117	0.00421	0.0528	8.97e-08	1.15e-06	-0.083	0.194	0.706
ONC0001554	MDL-72832	Preclinical	serotonin receptor agonist	HTR1A			0.95	1.03	0.81	0.91	0.73	0.9	0.93	0.111	0.847	0.101	0.22	0.682	0.0125	0.0846	-0.083	0.196	0.706
ONC0005617	Temsavir	NA	NA	NA	NA	NA	1.1	0.88	1.12	0.9	0.95	1	1033	0.133	0.95	0.05	0.588	0.885	0.258	0.761	-0.083	0.198	0.708
ONC0003188	BACITRACIN	Launched	bacterial cell wall synthesis inhibitor	IDE	infectious disease	first-aid antibiotic	0.94	0.99	1.01	0.77	0.91	1.01	0.98	0.0361	0.897	0.121	0.385	0.789	0.0706	0.343	-0.083	0.177	0.694
ONC0000858	1-naphthyl-PP1	Preclinical	SRC inhibitor	SRC			1.44	1.09	0.79	1.02	1.05	1	1107	0.325	1023	0.0252	0.823	0.974	0.684	1	-0.083	0.351	0.85
ONC0000594	EBSELEN	Phase 2/Phase 3	cyclooxygenase inhibitor|glutathione peroxidase agonist|H+/K+-ATPase inhibitor|nitric oxide synthase inhibitor	ALB			0.93	1.16	1.19	1.09	0.87	1.07	1093	0.142	1.01	0.122	0.788	0.963	0.608	0.997	-0.083	0.242	0.754
ONC0002738	AMCINONIDE	Launched	glucocorticoid receptor agonist	NR3C1	dermatology	corticosteroid-responsive dermatoses	0.95	1.19	0.95	0.94	0.97	0.93	1.03	0.139	0.947	0.0208	0.575	0.879	0.242	0.735	-0.083	0.204	0.71
ONC0000604	CARBENOXOLONE SODIUM	NA	NA	NA	NA	NA	1.15	0.98	1.13	0.87	1.14	1	1087	0.0929	1003	0.135	0.769	0.954	0.568	0.985	-0.083	0.217	0.727
ONC0002103	BMS-983970	Phase 1	notch signaling inhibitor				1.27	0.98	1.26	1.01	1.05	1.2	1.17	0.165	1087	0.1	0.938	1	0.927	1	-0.083	0.252	0.76
ONC0000887	TA-01	Preclinical	casein kinase inhibitor|MAP kinase inhibitor	CSNK1D|CSNK1E|MAPK14			0.68	0.96	0.83	0.94	0.46	0.82	0.823	0.14	0.74	0.25	0.0359	0.264	5.13e-05	0.000526	-0.083	0.324	0.83
ONC0001892	MesulergineHCl	NA	NA	NA	NA	NA	1.14	1	1.02	0.88	1.06	0.97	1053	0.0757	0.97	0.09	0.661	0.916	0.366	0.877	-0.083	0.144	0.653
ONC0001896	ocinaplon	Phase 3	GABA receptor modulator	GABRA1|GABRA2|GABRA3|GABRA5			1.25	1.11	0.97	1.08	1.03	0.97	1.11	0.14	1027	0.0551	0.832	0.975	0.703	1	-0.083	0.209	0.719
ONC0005447	METYRAPONE	Launched	cytochrome P450 inhibitor	CYP11B1	nephrology	adrenal diagnostic agent	1.08	1.22	1.06	0.97	1.17	0.97	1.12	0.0872	1037	0.115	0.855	0.984	0.754	1	-0.083	0.189	0.705
ONC0002943	eucatropine	Preclinical	acetylcholine receptor antagonist				1.12	1.02	1	1.01	0.87	1.01	1047	0.0643	0.963	0.0808	0.637	0.909	0.329	0.839	-0.083	0.119	0.63
ONC0002931	acetylsalicylsalicylic-acid	Preclinical	cyclooxygenase inhibitor				0.94	0.95	1.22	0.99	0.92	0.95	1037	0.159	0.953	0.0351	0.6	0.889	0.275	0.784	-0.083	0.231	0.743
ONC0005407	WAY 316606	NA	NA	NA	NA	NA	0.94	1.08	1.36	1	1	1.13	1127	0.214	1043	0.0751	0.869	0.988	0.785	1	-0.083	0.289	0.802
ONC0002950	parthenolide-(alternate-stereo)	Preclinical	NFkB pathway inhibitor	IKBKB|RELA			1.04	1.09	0.98	0.86	1	1	1037	0.0551	0.953	0.0808	0.6	0.889	0.275	0.784	-0.083	0.112	0.622
ONC0004755	Nilvadipine (ARC029)	NA	NA	NA	NA	NA	0.97	0.78	1.04	0.98	0.57	1	0.93	0.135	0.85	0.243	0.22	0.682	0.0143	0.0945	-0.08	0.325	0.832
ONC0002161	L-cysteine	Launched		CARS|CARS2|CBS|CDO-1|CDO1|CSAD|CTH|GCLC|GCLM|GOT1|GSS|MGMT|NFS1|SLC19A3	rheumatology	osteoarthritis|rheumatoid arthritis	0.84	1.5	1.02	1.09	0.98	1.05	1.12	0.341	1.04	0.0557	0.855	0.984	0.769	1	-0.08	0.363	0.85
ONC0004827	Alfacalcidol	Launched	vitamin D receptor agonist	CYP27B1|VDR	endocrinology	vitamin D deficiency	0.94	0.93	1.08	0.79	1.01	0.91	0.983	0.0839	0.903	0.11	0.398	0.792	0.0856	0.393	-0.08	0.189	0.705
ONC0004055	D-(-)-Tagatose	NA	NA	NA	NA	NA	1.27	0.96	1.06	1.09	0.93	1.03	1097	0.158	1017	0.0808	0.797	0.966	0.647	1	-0.08	0.246	0.758
ONC0004493	AT13148	Phase 1	protein kinase inhibitor	AKT1|AKT2|AKT3|ROCK1|ROCK2|SGK3			1.07	0.84	0.98	0.81	0.96	0.88	0.963	0.116	0.883	0.0751	0.326	0.763	0.0468	0.252	-0.08	0.191	0.705
ONC0004539	Cinepazide maleate	NA	NA	NA	NA	NA	0.78	1.29	1.16	1.02	1.11	0.86	1077	0.265	0.997	0.127	0.739	0.947	0.528	0.968	-0.08	0.335	0.84
ONC0004073	OMEPRAZOLE	Launched	ATPase inhibitor	ATP4A|CLCN2	gastroenterology	heartburn	0.82	1.03	1.22	0.86	0.91	1.06	1023	0.2	0.943	0.104	0.55	0.868	0.226	0.711	-0.08	0.291	0.804
ONC0003756	2-methyl-5-nitrophenol	Preclinical					1.04	1.33	0.9	0.99	1.05	0.99	1.09	0.219	1.01	0.0346	0.779	0.959	0.608	0.997	-0.08	0.297	0.811
ONC0003755	mandelic-acid	Launched					0.98	1	1.04	0.98	0.92	0.88	1007	0.0306	0.927	0.0503	0.486	0.843	0.157	0.579	-0.08	0.0461	0.497
ONC0004903	Safinamide Mesylate (FCE28073)	NA	NA	NA	NA	NA	0.79	1.29	1.3	1.12	1.04	0.98	1127	0.292	1047	0.0702	0.869	0.988	0.799	1	-0.08	0.343	0.847
ONC0004020	MILRINONE	Launched	phosphodiesterase inhibitor	PDE2A|PDE3A|PDE3B|PDE5A	cardiology	congestive heart failure	1.12	1	1.02	0.99	1.06	0.85	1047	0.0643	0.967	0.107	0.637	0.909	0.347	0.857	-0.08	0.171	0.687
ONC0003841	ALLANTOIN	Launched	cosmetic		dermatology	skin protectant	0.89	1.04	1.17	0.91	1.06	0.89	1033	0.14	0.953	0.0929	0.588	0.885	0.275	0.784	-0.08	0.231	0.744
ONC0005139	Skepinone-L	Preclinical	p38 MAPK inhibitor	MAPK14			0.91	1.03	0.96	0.92	0.83	0.91	0.967	0.0603	0.887	0.0493	0.337	0.769	0.0521	0.274	-0.08	0.0763	0.582
ONC0002531	Betrixaban	Launched	coagulation factor inhibitor	KCNH2	hematology	deep vein thrombosis (DVT)	0.89	1.03	0.84	0.85	0.94	0.73	0.92	0.0985	0.84	0.105	0.192	0.64	0.00954	0.0666	-0.08	0.196	0.706
ONC0003005	2-TEDC	Preclinical	lipoxygenase inhibitor	ALOX12			0.96	0.97	1.15	0.79	1.05	1	1027	0.107	0.947	0.138	0.563	0.874	0.242	0.735	-0.08	0.237	0.747
ONC0003424	PHENYLMERCURIC ACETATE	NA	NA	NA	NA	NA	1.13	1.27	0.96	1	1.11	1.01	1.12	0.155	1.04	0.0608	0.855	0.984	0.769	1	-0.08	0.238	0.747
ONC0000682	DOXYCYCLINE HYDROCHLORIDE	NA	NA	NA	NA	NA	1.25	0.8	1.3	1.2	1.01	0.9	1117	0.275	1037	0.152	0.847	0.98	0.754	1	-0.08	0.344	0.848
ONC0002709	dimaprit	Preclinical	histamine receptor agonist	HRH2|HRH3|HRH4			1.18	0.82	1.18	1.06	0.92	0.96	1.06	0.208	0.98	0.0721	0.684	0.925	0.426	0.919	-0.08	0.291	0.804
ONC0002682	tetrabenazine	Launched	vesicular monoamine transporter inhibitor	SLC18A1|SLC18A2	infectious disease|neurology/psychiatry	cholera|Huntington's disease	1.08	1.06	1.03	1.06	0.91	0.96	1057	0.0252	0.977	0.0764	0.673	0.923	0.406	0.902	-0.08	0.102	0.614
ONC0001394	2'-MeCCPA	Preclinical	adenosine receptor agonist	ADORA1			1.03	1.34	1.06	0.96	1.21	1.02	1143	0.171	1063	0.131	0.9	0.998	0.864	1	-0.08	0.278	0.789
ONC0002300	FEXOFENADINE HYDROCHLORIDE	NA	NA	NA	NA	NA	1.26	1	1.04	1.02	1.03	1.01	1.1	0.14	1.02	0.01	0.806	0.968	0.666	1	-0.08	0.213	0.724
ONC0002365	COLFORSIN	Phase 2	adenylyl cyclase activator	ADCY2|ADCY5			1.01	1.24	1.08	1.12	0.95	1.02	1.11	0.118	1.03	0.0854	0.832	0.975	0.72	1	-0.08	0.2	0.71
ONC0001277	Pevonedistat hydrochloride	NA	NA	NA	NA	NA	0.59	0.94	0.87	0.68	0.68	0.8	0.8	0.185	0.72	0.0693	0.0214	0.186	1.38e-05	0.00015	-0.08	0.271	0.779
ONC0002339	hydroxytacrine-maleate-(r,s)	Preclinical	cholinesterase inhibitor	ACHE			0.95	1.1	0.97	0.86	1.06	0.86	1007	0.0814	0.927	0.115	0.486	0.843	0.157	0.579	-0.08	0.194	0.706
ONC0005612	aminothiadiazole	Phase 2	inosine monophosphate dehydrogenase inhibitor	ADORA3|IMPDH1			1.38	0.99	0.9	0.95	0.98	1.1	1.09	0.255	1.01	0.0794	0.779	0.959	0.608	0.997	-0.08	0.324	0.83
ONC0005490	Miglustat (N-ButyldeoxynojirimycinHCl)	NA	NA	NA	NA	NA	1.27	1.27	0.95	1.2	1.06	0.99	1163	0.185	1083	0.107	0.93	1	0.92	1	-0.08	0.28	0.789
ONC0005554	Elagolix	Launched	gonadotropin releasing factor hormone receptor antagonist	GNRHR			0.88	1.29	1.16	1.03	1.03	1.03	1.11	0.21	1.03	0	0.832	0.975	0.72	1	-0.08	0.288	0.801
ONC0001506	dihydroergocristine	Launched	adrenergic receptor antagonist|prolactin inhibitor	ADRA1A|ADRB1|DRD1|DRD2|DRD3|DRD4|DRD5|HTR1A|HTR2A|HTR3A|HTR4|HTR5A|HTR6|HTR7	neurology/psychiatry	senile dementia|cerebrovascular insufficiency	0.96	1.05	0.87	0.96	0.98	0.7	0.96	0.09	0.88	0.156	0.314	0.758	0.042	0.232	-0.08	0.247	0.759
ONC0005573	PF-05190457	Phase 2	growth hormone secretagogue receptor inverse agonist	GHSR			0.98	1.25	1	0.96	1.02	1.01	1077	0.15	0.997	0.0321	0.739	0.947	0.528	0.968	-0.08	0.228	0.74
ONC0001583	BP-554	Preclinical	serotonin receptor agonist	HTR1A			1.3	0.78	0.96	0.89	1.12	0.79	1013	0.264	0.933	0.169	0.512	0.856	0.182	0.63	-0.08	0.343	0.847
ONC0002747	Azomycin (2-Nitroimidazole)	NA	NA	NA	NA	NA	0.95	1.25	0.99	0.92	0.98	1.05	1063	0.163	0.983	0.0651	0.695	0.93	0.446	0.932	-0.08	0.247	0.759
ONC0003200	AMITRIPTYLINE HYDROCHLORIDE	NA	NA	NA	NA	NA	0.96	1.15	0.95	0.86	1.06	0.9	1.02	0.113	0.94	0.106	0.537	0.863	0.211	0.681	-0.08	0.21	0.721
ONC0002773	ML-277	Preclinical	potassium channel activator	KCNQ1			0.99	0.9	0.86	0.91	0.72	0.88	0.917	0.0666	0.837	0.102	0.184	0.621	0.0083	0.0596	-0.08	0.164	0.682
ONC0000607	SULFAMETHOXAZOLE	Launched	PABA antagonist		infectious disease|gastroenterology	pneumonia|enteritis|urinary tract infections	0.97	1.25	1.05	1.02	0.87	1.14	1.09	0.144	1.01	0.135	0.779	0.959	0.608	0.997	-0.08	0.261	0.77
ONC0000600	PHENIRAMINE MALEATE	NA	NA	NA	NA	NA	0.79	1.06	1.07	0.83	0.92	0.93	0.973	0.159	0.893	0.0551	0.361	0.778	0.064	0.318	-0.08	0.241	0.75
ONC0003304	PHENYL AMINOSALICYLATE	NA	NA	NA	NA	NA	1.02	1.21	1.02	0.93	1.02	1.06	1083	0.11	1003	0.0666	0.759	0.95	0.568	0.985	-0.08	0.176	0.692
ONC0000031	2-APB	Preclinical	1,4,5-trisphosphate inhibitor	TRPC1|TRPC3|TRPC4|TRPC5|TRPC6|TRPC7|TRPM2|TRPM3|TRPM6|TRPV1|TRPV6			0.9	1.26	1.25	1.2	1.01	0.96	1137	0.205	1057	0.127	0.888	0.995	0.84	1	-0.08	0.301	0.813
ONC0001861	Losmapimod	Phase 3	p38 MAPK inhibitor	MAPK14			0.87	0.93	0.93	0.87	0.87	0.75	0.91	0.0346	0.83	0.0693	0.167	0.597	0.00624	0.0466	-0.08	0.0867	0.597
ONC0001891	4-iodo-L-phenylalanine	Preclinical		DPP4			1.2	1.14	1	0.99	1.05	1.06	1113	0.103	1033	0.0379	0.84	0.979	0.737	1	-0.08	0.155	0.664
ONC0000917	TG 100572 (Hydrochloride)	NA	NA	NA	NA	NA	0.95	0.92	0.98	0.9	0.85	0.86	0.95	0.03	0.87	0.0265	0.281	0.736	0.0299	0.177	-0.08	0.0132	0.321
ONC0001712	BAY-11-7085	Preclinical	NFkB pathway inhibitor	NFKBIA			0.69	1.2	1.22	0.78	0.97	1.12	1037	0.3	0.957	0.17	0.6	0.889	0.292	0.806	-0.08	0.357	0.85
ONC0002982	chloroxoquinoline	Launched					0.8	1.09	1.45	1.11	1	0.99	1113	0.326	1033	0.0666	0.84	0.979	0.737	1	-0.08	0.357	0.85
ONC0001211	(-)-Huperzine A	NA	NA	NA	NA	NA	0.8	1.2	1.18	1.02	0.95	0.97	1.06	0.225	0.98	0.0361	0.684	0.925	0.426	0.919	-0.08	0.301	0.814
ONC0001181	Pemirolast (potassium)	NA	NA	NA	NA	NA	0.86	1.25	0.89	0.93	0.83	1	1	0.217	0.92	0.0854	0.461	0.831	0.133	0.526	-0.08	0.3	0.813
ONC0001172	Satraplatin	Phase 3	DNA alkylating agent				0.87	0.68	0.86	0.81	0.74	0.62	0.803	0.107	0.723	0.0961	0.0231	0.199	1.73e-05	0.000185	-0.08	0.195	0.706
ONC0002986	tribomsalan	Preclinical					1.2	1.11	1.06	1.02	1.17	0.94	1123	0.0709	1043	0.117	0.862	0.986	0.785	1	-0.08	0.189	0.705
ONC0001201	VAL-083	NA	NA	NA	NA	NA	0.98	0.8	1	0.97	0.59	0.98	0.927	0.11	0.847	0.222	0.21	0.668	0.0125	0.0846	-0.08	0.308	0.819
ONC0002968	pirenperone	Preclinical	serotonin receptor antagonist	HTR2A|HTR7			0.96	0.96	0.98	0.88	0.87	0.91	0.967	0.0115	0.887	0.0208	0.337	0.769	0.0521	0.274	-0.08	0.00451	0.239
ONC0002199	CI-923	Phase 1	acetylcholine receptor antagonist				0.87	0.79	1.11	0.66	0.99	0.89	0.923	0.167	0.847	0.169	0.201	0.653	0.0125	0.0846	-0.077	0.303	0.815
ONC0004748	Sorafenib Tosylate	NA	NA	NA	NA	NA	1.09	1.11	1.02	1.08	0.96	0.95	1073	0.0473	0.997	0.0723	0.728	0.942	0.528	0.968	-0.077	0.105	0.616
ONC0004566	Dorzolamide HCL	NA	NA	NA	NA	NA	1.19	0.92	1.16	1.01	1.13	0.9	1.09	0.148	1013	0.115	0.779	0.959	0.628	1	-0.077	0.26	0.769
ONC0005224	AZD4547	Phase 2/Phase 3	FGFR inhibitor	FGFR1|FGFR2|FGFR3|FGFR4|IGF1R|KDR			0.96	0.91	1.2	0.86	1.01	0.97	1023	0.155	0.947	0.0777	0.55	0.868	0.242	0.735	-0.077	0.25	0.76
ONC0004546	3-deazaneplanocin A (DZNeP) HCl	NA	NA	NA	NA	NA	0.56	0.88	0.62	0.66	0.53	0.64	0.687	0.17	0.61	0.07	0.000915	0.0145	1.97e-09	2.8e-08	-0.077	0.264	0.772
ONC0004545	AZD6738	Phase 2	ATR kinase inhibitor	ATR			0.81	0.94	0.98	0.78	0.78	0.94	0.91	0.0889	0.833	0.0924	0.167	0.597	0.00721	0.0527	-0.077	0.179	0.695
ONC0004179	TILORONE	Launched	interferon inducer		infectious disease|gastroenterology|neurology/psychiatry	influenza A virus infection|diarrhea|hepatitis B|multiple sclerosis|urinary tract infections|virus herpes simplex (HSV)|hepatitis C	0.94	0.97	0.94	0.86	0.8	0.96	0.95	0.0173	0.873	0.0808	0.281	0.736	0.0336	0.195	-0.077	0.12	0.63
ONC0004178	TRAMADOL HYDROCHLORIDE	NA	NA	NA	NA	NA	1.18	0.96	1.06	1.02	0.98	0.97	1067	0.11	0.99	0.0265	0.707	0.935	0.487	0.945	-0.077	0.176	0.691
ONC0004044	CYPROHEPTADINE HYDROCHLORIDE	NA	NA	NA	NA	NA	0.99	1.03	1	0.96	0.89	0.94	1007	0.0208	0.93	0.0361	0.486	0.843	0.169	0.607	-0.077	0.0227	0.383
ONC0004342	Fedratinib (SAR302503, TG101348)	NA	NA	NA	NA	NA	0.97	0.87	0.95	0.94	0.96	0.66	0.93	0.0529	0.853	0.168	0.22	0.682	0.0162	0.106	-0.077	0.259	0.767
ONC0003648	[Sar9,Met(O2)11]-Substance P	NA	NA	NA	NA	NA	1	1	1.01	0.82	1	0.96	1003	0.00577	0.927	0.0945	0.473	0.837	0.157	0.579	-0.077	0.148	0.654
ONC0003650	Met-enkephalin	Phase 2	immunostimulant	OPRD1			1	1.28	1.09	1.12	0.91	1.11	1123	0.143	1047	0.118	0.862	0.986	0.799	1	-0.077	0.258	0.766
ONC0003855	(ethylsulfanyl)methanimidamide hydrobromide	NA	NA	NA	NA	NA	0.88	1.04	1.08	0.59	1.17	1.01	1	0.106	0.923	0.3	0.461	0.831	0.145	0.552	-0.077	0.355	0.85
ONC0002516	NSC-663284	Preclinical	CDC inhibitor	CDC25A|CDC25B|CDC25C			0.75	0.73	1.05	0.69	0.92	0.69	0.843	0.179	0.767	0.133	0.054	0.336	0.000257	0.00241	-0.077	0.293	0.805
ONC0004245	CILOSTAZOL	Launched	phosphodiesterase inhibitor	PDE3A|PDE3B	cardiology	claudication	0.82	1.17	0.96	0.99	1.03	0.7	0.983	0.176	0.907	0.18	0.398	0.792	0.0939	0.419	-0.077	0.313	0.822
ONC0003073	dantrolene	Launched	calcium channel blocker	RYR1|RYR3	neurology/psychiatry|endocrinology	spasms|malignant hyperthermia (MH)	0.83	1.03	0.97	0.72	0.95	0.93	0.943	0.103	0.867	0.127	0.26	0.717	0.0266	0.161	-0.077	0.232	0.744
ONC0002900	AKLOMIDE	Launched			infectious disease	coccidiosis	1.18	1.04	1.04	0.94	1.03	1.06	1087	0.0808	1.01	0.0624	0.769	0.954	0.608	0.997	-0.077	0.134	0.639
ONC0002901	propyl 4-hydroxybenzoate	NA	NA	NA	NA	NA	1	1.1	0.95	0.89	0.93	1	1017	0.0764	0.94	0.0557	0.525	0.861	0.211	0.681	-0.077	0.12	0.63
ONC0000651	PROGLUMIDE SODIUM	NA	NA	NA	NA	NA	1.27	0.92	1.23	1.16	1.04	0.99	1.14	0.192	1063	0.0874	0.894	0.998	0.864	1	-0.077	0.288	0.801
ONC0000671	DOXYLAMINE SUCCINATE	NA	NA	NA	NA	NA	1.19	0.99	1.15	0.96	1.06	1.08	1.11	0.106	1033	0.0643	0.832	0.975	0.737	1	-0.077	0.178	0.695
ONC0000648	FOSFOMYCIN CALCIUM	NA	NA	NA	NA	NA	1.04	1.24	1.08	1.01	0.98	1.14	1.12	0.106	1043	0.085	0.855	0.984	0.785	1	-0.077	0.193	0.706
ONC0000718	ERYTHROMYCIN	Launched	NFkB pathway inhibitor	MLNR	infectious disease	listeria|respiratory tract infections|skin infections|syphilis|amebiasis|pelvic inflammatory disease|chlamydia|diphtheria|erythrasma	1.1	1	0.99	1.01	0.76	1.09	1.03	0.0608	0.953	0.172	0.575	0.879	0.275	0.784	-0.077	0.265	0.772
ONC0000737	Anamorelin	Phase 3	growth hormone secretagogue receptor agonist	GHSR			0.94	0.93	0.74	0.83	0.77	0.78	0.87	0.113	0.793	0.0321	0.0884	0.443	0.0011	0.0095	-0.077	0.18	0.697
ONC0000205	C-021	Preclinical	CC chemokine receptor antagonist	CCR4			0.86	0.95	0.99	1.05	0.86	0.66	0.933	0.0666	0.857	0.195	0.229	0.688	0.0184	0.118	-0.077	0.287	0.8
ONC0000210	lylamine	Preclinical	cannabinoid receptor agonist	CNR1			0.84	1.3	1.07	0.97	1.01	1	1.07	0.23	0.993	0.0208	0.717	0.938	0.507	0.957	-0.077	0.311	0.821
ONC0002443	CANDICIDIN	Launched	fungal ergosterol inhibitor		infectious disease	vulvovaginal candidiasis	1.05	0.89	1.36	1.02	0.99	1.06	1.1	0.239	1023	0.0351	0.806	0.968	0.684	1	-0.077	0.318	0.826
ONC0002639	N-[2-(Piperidinylamino)ethyl]-4-iodobenzamide	Preclinical	sigma receptor ligand				1.05	1.05	1.11	0.93	1.04	1.01	1.07	0.0346	0.993	0.0569	0.717	0.938	0.507	0.957	-0.077	0.0658	0.561
ONC0001113	CPI-0610	Phase 2	bromodomain inhibitor	BRD4			0.71	0.54	0.54	0.46	0.68	0.42	0.597	0.0981	0.52	0.14	3.4e-05	0.000737	1.75e-13	2.95e-12	-0.077	0.243	0.754
ONC0001131	Tirapazamine	Phase 3	DNA inhibitor				1.21	1.18	0.94	1.03	1.05	1.02	1.11	0.148	1033	0.0153	0.832	0.975	0.737	1	-0.077	0.232	0.744
ONC0001405	GW-4064	Preclinical	FXR agonist	NR1H4			1.04	1.4	0.86	1.03	0.96	1.08	1.1	0.275	1023	0.0603	0.806	0.968	0.684	1	-0.077	0.34	0.845
ONC0001594	vanoxerine	Phase 3	dopamine reuptake inhibitor	SLC6A3			1.11	1.15	0.96	0.87	1.03	1.09	1073	0.1	0.997	0.114	0.728	0.942	0.528	0.968	-0.077	0.216	0.726
ONC0003492	Goserelin Acetate	NA	NA	NA	NA	NA	0.91	1.31	0.72	0.9	1.1	0.71	0.98	0.301	0.903	0.195	0.385	0.789	0.0856	0.393	-0.077	0.367	0.852
ONC0000266	Guacetisal	Launched	immunosuppressant		pulmonary	cough suppressant	0.95	1.16	1.22	1.04	0.96	1.1	1.11	0.142	1033	0.0702	0.832	0.975	0.737	1	-0.077	0.232	0.744
ONC0002305	4-hydroxy-phenazone	Preclinical					1.12	1.23	1.11	1.06	1	1.17	1153	0.0666	1077	0.0862	0.916	1	0.904	1	-0.077	0.147	0.653
ONC0002331	pelanserin	Phase 2	serotonin receptor antagonist	HTR2A			0.83	1.16	1.06	1.02	0.87	0.93	1017	0.169	0.94	0.0755	0.525	0.861	0.211	0.681	-0.077	0.265	0.772
ONC0005615	levothyroxine	Launched	thyroid hormone stimulant	THRA|THRB	endocrinology	myxedema coma	0.8	1.29	1.11	1	0.94	1.03	1067	0.248	0.99	0.0458	0.707	0.935	0.487	0.945	-0.077	0.324	0.83
ONC0003239	TRIFLUOPERAZINE HYDROCHLORIDE	NA	NA	NA	NA	NA	1.04	0.95	1.11	0.93	0.98	0.96	1033	0.0802	0.957	0.0252	0.588	0.885	0.292	0.806	-0.077	0.117	0.63
ONC0000447	PROCAINE HYDROCHLORIDE	NA	NA	NA	NA	NA	1.01	1.08	1.11	1.02	0.94	1.01	1067	0.0513	0.99	0.0436	0.707	0.935	0.487	0.945	-0.077	0.0609	0.547
ONC0000532	FLUOROMETHOLONE	Launched	glucocorticoid receptor agonist	NR3C1	ophthalmology	eye inflammation	0.96	0.95	1	0.7	0.93	1.05	0.97	0.0265	0.893	0.178	0.349	0.774	0.064	0.318	-0.077	0.267	0.774
ONC0000998	Pivmecillinam (hydrochloride)	NA	NA	NA	NA	NA	1.15	0.97	0.83	1.07	0.71	0.94	0.983	0.16	0.907	0.182	0.398	0.792	0.0939	0.419	-0.077	0.307	0.819
ONC0001938	SYM 2081	NA	NA	NA	NA	NA	1.03	1.01	0.99	1.11	0.67	1.02	1.01	0.02	0.933	0.232	0.499	0.851	0.182	0.63	-0.077	0.313	0.822
ONC0005292	ALOGLIPTIN BENZOATE	NA	NA	NA	NA	NA	0.81	0.99	1.42	0.98	0.99	1.02	1073	0.313	0.997	0.0208	0.728	0.942	0.528	0.968	-0.077	0.357	0.85
ONC0002005	enciprazine	Phase 3	GABA receptor modulator	GABRA1			0.83	0.84	1.31	1.02	0.86	0.87	0.993	0.274	0.917	0.0896	0.435	0.817	0.122	0.499	-0.077	0.342	0.846
ONC0005349	IPRIFLAVONE	Launched	bone resorption inhibitor		orthopedics	osteoporosis	1.14	0.68	0.8	0.71	0.94	0.74	0.873	0.239	0.797	0.125	0.0936	0.451	0.0013	0.0112	-0.077	0.328	0.835
ONC0001174	Didox	Launched	ribonucleotide reductase inhibitor	RRM1	oncology	breast cancer	1.2	1.14	1	1.08	1.04	0.99	1113	0.103	1037	0.0451	0.84	0.979	0.754	1	-0.077	0.164	0.682
ONC0003705	ST-1859	Phase 1	antiamyloidogenic agent				1	1.06	1.1	0.96	0.99	0.99	1053	0.0503	0.98	0.0173	0.661	0.916	0.426	0.919	-0.073	0.0578	0.541
ONC0003783	sulfametopyrazine	Launched	PABA antagonist		infectious disease	malaria|urinary tract infections|respiratory tract infections	0.9	1.06	0.87	0.95	0.65	1.01	0.943	0.102	0.87	0.193	0.26	0.717	0.0299	0.177	-0.073	0.3	0.813
ONC0004314	1-Azakenpaullone	Preclinical	glycogen synthase kinase inhibitor	CCNB1|CDK1|CDK5|GSK3B			0.85	0.98	0.91	0.88	0.88	0.76	0.913	0.0651	0.84	0.0693	0.175	0.612	0.00954	0.0666	-0.073	0.126	0.632
ONC0004037	DOCOSANOL	Launched	lipase clearing factor inhibitor	TLR7	dental	cold sore	1.15	1.14	0.96	0.96	1.06	1.01	1083	0.107	1.01	0.05	0.759	0.95	0.608	0.997	-0.073	0.182	0.701
ONC0003964	BENURESTAT	Phase 1	urease inhibitor				0.87	0.93	1.08	0.92	0.97	0.77	0.96	0.108	0.887	0.104	0.314	0.758	0.0521	0.274	-0.073	0.223	0.734
ONC0004048	LIPOAMIDE	Preclinical					1.07	1.21	1.05	1	1.02	1.09	1.11	0.0872	1037	0.0473	0.832	0.975	0.754	1	-0.073	0.144	0.653
ONC0005084	Clorsulon	Launched	glycolysis inhibitor		infectious disease	gastrointestinal roundworms|lungworms|liver flukes|lice|mites	1.06	1.2	1.18	1.25	1	0.97	1147	0.0757	1073	0.154	0.906	1	0.894	1	-0.073	0.257	0.766
ONC0004263	PROFLAVINE HEMISULFATE	NA	NA	NA	NA	NA	0.95	0.98	0.93	0.91	0.93	0.8	0.953	0.0252	0.88	0.07	0.292	0.741	0.042	0.232	-0.073	0.102	0.614
ONC0002497	MG-624	Preclinical	acetylcholine receptor antagonist	CHRNA7			1.82	1.15	0.79	1.31	1.16	1.07	1253	0.523	1.18	0.121	0.99	1	0.998	1	-0.073	0.417	0.89
ONC0003933	OROTIC ACID	NA	NA	NA	NA	NA	1.03	1.01	0.85	1.01	0.7	0.96	0.963	0.0987	0.89	0.166	0.326	0.763	0.0578	0.295	-0.073	0.278	0.789
ONC0002891	Fomocain	NA	NA	NA	NA	NA	1.29	1.02	0.96	1.03	1.01	1.01	1.09	0.176	1017	0.0115	0.779	0.959	0.647	1	-0.073	0.273	0.781
ONC0002886	TENOXICAM	Launched	cyclooxygenase inhibitor	PTGS1|PTGS2	rheumatology|orthopedics	rheumatoid arthritis|osteoarthritis|ankylosing spondylitis|tendinitis|bursitis|periarthritis	1.03	0.83	1.42	0.96	1.02	1.08	1093	0.3	1.02	0.06	0.788	0.963	0.666	1	-0.073	0.358	0.85
ONC0000181	cutamesine	Phase 2	sigma receptor agonist	SIGMAR1			0.9	1.07	1.2	1.01	0.94	1	1057	0.15	0.983	0.0379	0.673	0.923	0.446	0.932	-0.073	0.245	0.757
ONC0000727	ESTRADIOL VALERATE	NA	NA	NA	NA	NA	0.98	0.98	1.22	0.99	1	0.97	1.06	0.139	0.987	0.0153	0.684	0.925	0.466	0.944	-0.073	0.228	0.74
ONC0002659	NVP-DPP728	Phase 2	dipeptidyl peptidase inhibitor	DPP4			0.99	0.98	1.41	1.03	1.03	1.1	1127	0.245	1053	0.0404	0.869	0.988	0.827	1	-0.073	0.329	0.837
ONC0002672	JW-67	Preclinical	WNT pathway inhibitor	APC|AXIN1|GSK3B			1.05	1	1.1	1.06	0.86	1.01	1.05	0.05	0.977	0.104	0.649	0.915	0.406	0.902	-0.073	0.177	0.694
ONC0002230	Mangafodipir (trisodium)	NA	NA	NA	NA	NA	1.31	1.03	0.9	0.96	1.03	1.03	1.08	0.21	1007	0.0404	0.749	0.947	0.588	0.993	-0.073	0.304	0.817
ONC0001135	BNC105	Phase 2	tubulin polymerization inhibitor				0.4	0.29	0.23	0.24	0.36	0.1	0.307	0.0862	0.233	0.13	6.17e-12	2.83e-10	7.2e-32	2.39e-30	-0.073	0.234	0.744
ONC0000269	Deslanoside	Launched	Na/K-ATPase inhibitor	ATP1A1|ATP1A2|ATP1A3|ATP1A4|ATP1B1|ATP1B2|ATP1B3|FXYD2	cardiology	congestive heart failure|cardiac arrythmia	0.21	0.08	0.2	0.04	0.08	0.15	0.163	0.0723	0.09	0.0557	1.72e-16	1.45e-14	3.27e-44	2.6e-42	-0.073	0.12	0.63
ONC0001610	cilostamide	Preclinical	phosphodiesterase inhibitor	PDE3A|PDE3B			0.94	1.05	1.14	1	0.87	1.04	1043	0.1	0.97	0.0889	0.625	0.903	0.366	0.877	-0.073	0.199	0.708
ONC0001295	timolol	Launched	adrenergic receptor antagonist	ADRB1|ADRB2	ophthalmology	ocular hypertension|glaucoma	1.09	0.8	1.08	0.98	0.99	0.78	0.99	0.165	0.917	0.118	0.423	0.811	0.122	0.499	-0.073	0.284	0.795
ONC0001496	LY225910	Preclinical	CCK receptor antagonist	CCKBR			0.94	1.09	0.94	0.78	0.96	1.01	0.99	0.0866	0.917	0.121	0.423	0.811	0.122	0.499	-0.073	0.223	0.734
ONC0003142	S4	Preclinical	carbonic anhydrase inhibitor	CA12|CA9			0.88	0.86	1.24	0.93	0.99	0.84	0.993	0.214	0.92	0.0755	0.435	0.817	0.133	0.526	-0.073	0.311	0.821
ONC0003159	JX-401	Preclinical	p38 MAPK inhibitor	MAPK14			0.88	1.07	1.5	0.93	1.21	1.09	1.15	0.318	1077	0.14	0.911	1	0.904	1	-0.073	0.37	0.854
ONC0003333	Bifendate	Launched			infectious disease	hepatitis B|hepatitis C	0.9	1.19	1.2	1.05	1	1.02	1097	0.17	1023	0.0252	0.797	0.966	0.684	1	-0.073	0.267	0.774
ONC0002073	CUDC-427	Phase 1	apoptosis inhibitor	XIAP			0.9	0.84	0.79	0.76	0.72	0.83	0.843	0.0551	0.77	0.0557	0.054	0.336	0.00031	0.0029	-0.073	0.0901	0.603
ONC0000066	daminozide	Preclinical	KDM2A inhibitor	KDM2A|KDM7A|PHF8			1.15	0.96	1.12	1.02	0.87	1.12	1077	0.102	1003	0.126	0.739	0.947	0.568	0.985	-0.073	0.239	0.748
ONC0000950	RO-9187	Preclinical	HCV inhibitor				1.11	0.78	1.07	0.96	0.93	0.85	0.987	0.18	0.913	0.0569	0.41	0.805	0.112	0.472	-0.073	0.28	0.789
ONC0001923	iododexetimide	Phase 2	acetylcholine receptor antagonist				0.82	1.01	0.9	0.77	0.94	0.8	0.91	0.0954	0.837	0.0907	0.167	0.597	0.0083	0.0596	-0.073	0.195	0.706
ONC0001829	Doripenem (monohydrate)	NA	NA	NA	NA	NA	1.1	1.03	0.8	0.72	0.97	1.02	0.977	0.157	0.903	0.161	0.373	0.785	0.0856	0.393	-0.073	0.301	0.813
ONC0005374	2-oxopropanoate	Preclinical	pyruvate dehydrogenase kinase inhibitor	ABAT			1.1	1.05	1.15	1.17	0.93	0.98	1.1	0.05	1027	0.127	0.806	0.968	0.703	1	-0.073	0.214	0.725
ONC0002933	zuclopenthixol	Launched	dopamine receptor antagonist	ADRA1A|ADRA2A|DRD1|DRD2|DRD5|HRH1|HTR2A	neurology/psychiatry	schizophrenia|bipolar disorder	0.82	0.73	1.35	1.09	0.91	0.68	0.967	0.335	0.893	0.206	0.337	0.769	0.064	0.318	-0.073	0.383	0.865
ONC0005412	L-leucine	Phase 3		BCAT1|BCAT2|LARS|LARS2|LCMT1|LCMT2			1.03	1.09	0.99	0.87	1.07	0.95	1037	0.0503	0.963	0.101	0.6	0.889	0.329	0.839	-0.073	0.171	0.687
ONC0004812	Clodronate Disodium	NA	NA	NA	NA	NA	0.94	0.95	1.39	1.13	1	0.94	1093	0.257	1023	0.0971	0.788	0.963	0.684	1	-0.07	0.347	0.85
ONC0002174	bisphenol-a	Phase 1	synthetic estrogen	AR|ESR1|ESR2|ESRRG|PPARG			0.94	1.02	1.25	0.97	1.08	0.95	1.07	0.161	1	0.07	0.717	0.938	0.548	0.978	-0.07	0.272	0.781
ONC0005200	CAY10505	Preclinical	PI3K inhibitor	PIK3CG			0.91	0.74	0.99	0.56	0.9	0.97	0.88	0.128	0.81	0.219	0.105	0.474	0.00251	0.0205	-0.07	0.332	0.839
ONC0003543	etafenone	Launched	calcium channel blocker				0.49	0.98	1.11	0.74	0.9	0.73	0.86	0.327	0.79	0.0954	0.0739	0.403	0.000922	0.00813	-0.07	0.376	0.859
ONC0003536	TFC-007	Preclinical	prostaglandin inhibitor	HPGDS			1.09	1.02	1.17	1.1	1.02	0.95	1093	0.0751	1023	0.0751	0.788	0.963	0.684	1	-0.07	0.159	0.671
ONC0003967	ETHYNODIOL DIACETATE	NA	NA	NA	NA	NA	1.26	1.1	0.91	1.02	1.01	1.03	1.09	0.175	1.02	0.01	0.779	0.959	0.666	1	-0.07	0.28	0.789
ONC0004893	Ziprasidone hydrochloride	NA	NA	NA	NA	NA	0.98	0.96	1.11	0.97	1.04	0.83	1017	0.0814	0.947	0.107	0.525	0.861	0.242	0.735	-0.07	0.211	0.721
ONC0004898	Curcumin	Launched	cyclooxygenase inhibitor|histone acetyltransferase inhibitor|lipoxygenase inhibitor|NFkB pathway inhibitor	APP|CA1|CA12|CA14|CA2|CA4|CA6|CA9|CHRM3|CYP3A4|DNMT3B|EP300|MMP13|MMP9|NOS2|PTGS1|PTGS2|XDH			0.73	1.4	0.99	1.15	0.91	0.85	1.04	0.338	0.97	0.159	0.613	0.897	0.366	0.877	-0.07	0.384	0.866
ONC0005014	Sinomenine (Cucoline)	NA	NA	NA	NA	NA	0.97	0.91	1.34	0.94	1	1.07	1073	0.233	1003	0.0651	0.728	0.942	0.568	0.985	-0.07	0.33	0.838
ONC0005038	AGI-6780	Preclinical	isocitrate dehydrogenase inhibitor	IDH2			1.23	1.21	1.04	1.04	1.23	1	1.16	0.104	1.09	0.123	0.925	1	0.934	1	-0.07	0.247	0.759
ONC0003642	Meldonium	Launched	gamma butyrobetaine hydroxylase inhibitor	BBOX1	cardiology	coronary artery disease (CAD)	1.15	1.21	0.96	0.99	1.11	1.01	1107	0.131	1037	0.0643	0.823	0.974	0.754	1	-0.07	0.234	0.744
ONC0003625	GSK-1562590	Preclinical	urotensin receptor antagonist	UTS2R			1.08	1	0.93	0.89	1.05	0.86	1003	0.0751	0.933	0.102	0.473	0.837	0.182	0.63	-0.07	0.199	0.708
ONC0002544	CCT-031374	Preclinical	WNT signaling inhibitor	CTNNB1			0.77	1.13	0.8	0.71	1.09	0.69	0.9	0.2	0.83	0.225	0.144	0.563	0.00624	0.0466	-0.07	0.354	0.85
ONC0000642	CARBETAPENTANE CITRATE	NA	NA	NA	NA	NA	1.06	1.06	1.11	0.94	1.08	1	1077	0.0289	1007	0.0702	0.739	0.947	0.588	0.993	-0.07	0.11	0.622
ONC0003402	QUININE	Launched	hemozoin biocrystallization inhibitor	GP9|KCNB2|KCNN4|SLC29A4	infectious disease	malaria	1.07	1	1.22	1.09	1.08	0.91	1097	0.112	1027	0.101	0.797	0.966	0.703	1	-0.07	0.234	0.744
ONC0003366	fexinidazole	Phase 3					0.79	1	1.26	0.88	0.94	1.02	1017	0.235	0.947	0.0702	0.525	0.861	0.242	0.735	-0.07	0.332	0.839
ONC0000699	CAPTOPRIL	Launched	angiotensin converting enzyme inhibitor	ACE|LTA4H|MMP2|MMP9	cardiology|endocrinology|nephrology	hypertension|congestive heart failure|myocardial infarction|diabetes mellitus|diabetic nephropathy	1.09	1.06	0.89	0.96	0.9	0.97	1013	0.108	0.943	0.0379	0.512	0.856	0.226	0.711	-0.07	0.19	0.705
ONC0000728	ETHIONAMIDE	Launched	mycolic synthesis inhibitor		infectious disease	tuberculosis	1	1.13	1	1.04	0.93	0.95	1043	0.0751	0.973	0.0586	0.625	0.903	0.386	0.893	-0.07	0.138	0.646
ONC0000213	AS-1892802	Preclinical	rho associated kinase inhibitor	ROCK1			1.03	1.02	1.16	1.05	0.89	1.06	1.07	0.0781	1	0.0954	0.717	0.938	0.548	0.978	-0.07	0.192	0.705
ONC0002633	CP-99994	Phase 2	tachykinin antagonist	TACR1			0.98	1.15	1.02	0.99	1.04	0.91	1.05	0.0889	0.98	0.0656	0.649	0.915	0.426	0.919	-0.07	0.169	0.687
ONC0002606	RS-67333	Preclinical	serotonin receptor partial agonist	HTR4			1.11	0.92	0.97	0.98	0.8	1.01	1	0.0985	0.93	0.114	0.461	0.831	0.169	0.607	-0.07	0.233	0.744
ONC0000369	JW-642	Preclinical	monoacylglycerol lipase inhibitor	MGLL			1.06	1.21	0.99	0.94	1.1	1.01	1087	0.112	1017	0.0802	0.769	0.954	0.647	1	-0.07	0.217	0.727
ONC0001371	SB-206553	Preclinical	serotonin receptor antagonist	HTR2A|HTR2B|HTR2C			1.12	0.84	1.31	1.08	1	0.98	1.09	0.236	1.02	0.0529	0.779	0.959	0.666	1	-0.07	0.331	0.839
ONC0001646	ZCL-278	Preclinical	CDC inhibitor	CDC42			0.98	1.31	1	1	1.03	1.05	1097	0.185	1027	0.0252	0.797	0.966	0.703	1	-0.07	0.29	0.803
ONC0002304	nifekalant	Launched	potassium channel blocker		cardiology	ventricular arrhythmias|ventricular tachycardia (VT)	0.99	1	0.97	1.06	0.76	0.93	0.987	0.0153	0.917	0.15	0.41	0.805	0.122	0.499	-0.07	0.253	0.76
ONC0001314	Encenicline hydrochloride	NA	NA	NA	NA	NA	1.13	0.96	1.07	1.01	0.99	0.95	1053	0.0862	0.983	0.0306	0.661	0.916	0.446	0.932	-0.07	0.147	0.653
ONC0005458	Pterostilbene	Phase 2/Phase 3	cyclooxygenase inhibitor|PPAR receptor agonist	PTGS2			0.94	1.17	1.03	0.89	0.95	1.09	1047	0.116	0.977	0.103	0.637	0.909	0.406	0.902	-0.07	0.239	0.748
ONC0000873	Copanlisib	Launched	PI3K inhibitor	PIK3CA|PIK3CB|PIK3CD|PIK3CG	hematologic malignancy	follicular lymphoma	0.94	1.35	0.73	0.83	1.01	0.97	1007	0.315	0.937	0.0945	0.486	0.843	0.196	0.658	-0.07	0.372	0.855
ONC0003225	ACEGLUTAMIDE	Launched			gastroenterology	peptic ulcer disease (PUD)	0.95	1.29	1.12	1.09	1.01	1.05	1.12	0.17	1.05	0.04	0.855	0.984	0.814	1	-0.07	0.277	0.787
ONC0002745	Octenidine Dihydrochloride	NA	NA	NA	NA	NA	0.87	0.82	0.71	0.68	0.74	0.77	0.8	0.0819	0.73	0.0458	0.0214	0.186	2.69e-05	0.000283	-0.07	0.142	0.652
ONC0005532	AMIODARONE HYDROCHLORIDE	NA	NA	NA	NA	NA	0.84	1.13	1.16	1	0.94	0.98	1043	0.177	0.973	0.0306	0.625	0.903	0.386	0.893	-0.07	0.283	0.792
ONC0002801	Indole-3-carbinol	Phase 2/Phase 3	aryl hydrocarbon receptor agonist|indoleamine 2,3-dioxygenase inhibitor	AHR			0.87	1.35	0.82	1	0.99	0.84	1013	0.293	0.943	0.0896	0.512	0.856	0.226	0.711	-0.07	0.362	0.85
ONC0000609	KANAMYCIN A SULFATE	NA	NA	NA	NA	NA	0.94	1.14	1.03	1.17	0.75	0.98	1037	0.1	0.967	0.21	0.6	0.889	0.347	0.857	-0.07	0.32	0.829
ONC0000572	KETOPROFEN	Launched	cyclooxygenase inhibitor	PTGS1|PTGS2|SLC5A8	rheumatology	rheumatoid arthritis|osteoarthritis	0.98	1.03	1.02	0.78	1.04	1	1.01	0.0265	0.94	0.14	0.499	0.851	0.211	0.681	-0.07	0.24	0.748
ONC0002039	AZD3965	Phase 1	monocarboxylate transporter inhibitor	SLC16A1			0.79	1.26	1.26	1	1.06	1.04	1103	0.271	1033	0.0306	0.815	0.972	0.737	1	-0.07	0.35	0.85
ONC0000959	o-3M3FBS	Preclinical	phospholipase activator				1.05	0.94	1.5	1.12	1.14	1.02	1163	0.297	1093	0.0643	0.93	1	0.94	1	-0.07	0.363	0.85
ONC0001862	Decoquinate	Launched	antiprotozoal agent		infectious disease	coccidiosis	1.22	1.08	1	0.9	1.12	1.07	1.1	0.111	1.03	0.115	0.806	0.968	0.72	1	-0.07	0.246	0.758
ONC0001037	Umbralisib	NA	NA	NA	NA	NA	0.98	1.11	1.04	1.08	1.1	0.74	1043	0.0651	0.973	0.202	0.625	0.903	0.386	0.893	-0.07	0.309	0.819
ONC0001714	A-1120	Preclinical	retinoid receptor ligand	RBP4			1.26	0.91	1.08	1.08	1	0.96	1083	0.175	1013	0.0611	0.759	0.95	0.628	1	-0.07	0.284	0.795
ONC0002908	alfaxalone	NA	NA	NA	NA	NA	1.31	0.95	1	0.97	0.99	1.09	1087	0.195	1017	0.0643	0.769	0.954	0.647	1	-0.07	0.303	0.815
ONC0002196	succinylcholine-chloride	Launched		CHRFAM7A|CHRM1|CHRM2|CHRM3|CHRNA1|CHRNA10	neurology/psychiatry	muscle relaxant	0.91	1.39	0.84	0.98	0.97	0.99	1047	0.299	0.98	0.01	0.637	0.909	0.426	0.919	-0.067	0.368	0.852
ONC0004824	JSH-23	NA	NA	NA	NA	NA	0.84	0.97	1.31	0.97	0.98	0.97	1.04	0.243	0.973	0.00577	0.613	0.897	0.386	0.893	-0.067	0.341	0.846
ONC0004077	gedunin	Preclinical	HSP inhibitor	HSP90AA1			0.81	1.19	1.14	1.08	0.9	0.96	1047	0.206	0.98	0.0917	0.637	0.909	0.426	0.919	-0.067	0.324	0.83
ONC0005242	Formononetin (Formononetol)	NA	NA	NA	NA	NA	0.93	1.11	1.28	1.04	1.09	0.99	1107	0.175	1.04	0.05	0.823	0.974	0.769	1	-0.067	0.291	0.804
ONC0003526	PD-198306	Preclinical	MAP kinase inhibitor|MEK inhibitor	MAP2K1|MAP2K2			1.36	0.99	1.11	1.01	1.13	1.12	1153	0.189	1087	0.0666	0.916	1	0.927	1	-0.067	0.306	0.818
ONC0005046	YO-01027 (Dibenzazepine)	NA	NA	NA	NA	NA	1.79	0.61	0.75	0.97	1.03	0.95	1.05	0.645	0.983	0.0416	0.649	0.915	0.446	0.932	-0.067	0.437	0.898
ONC0003828	2-(diethylamino)ethyl 4-ethoxybenzoate	NA	NA	NA	NA	NA	1.03	1.17	1.12	1.03	1.07	1.02	1107	0.0709	1.04	0.0265	0.823	0.974	0.769	1	-0.067	0.12	0.63
ONC0003641	BMS-191011	Preclinical	potassium channel activator	KCNMA1			1.07	0.94	1.03	0.92	0.98	0.94	1013	0.0666	0.947	0.0306	0.512	0.856	0.242	0.735	-0.067	0.11	0.622
ONC0003851	semapimod	Phase 2	cytokine production inhibitor|p38 MAPK inhibitor	MAPK14			0.81	1.09	0.97	0.83	0.94	0.9	0.957	0.14	0.89	0.0557	0.303	0.751	0.0578	0.295	-0.067	0.254	0.761
ONC0002884	HYDROCORTISONE BUTYRATE	NA	NA	NA	NA	NA	1.24	0.98	1.1	1.06	1	1.06	1107	0.13	1.04	0.0346	0.823	0.974	0.769	1	-0.067	0.236	0.746
ONC0003386	favipiravir	Phase 3	RNA polymerase inhibitor				0.97	0.95	1.17	0.97	0.92	1	1.03	0.122	0.963	0.0404	0.575	0.879	0.329	0.839	-0.067	0.224	0.734
ONC0003358	ADENOSINE 5-MONOPHOSPHATE	NA	NA	NA	NA	NA	1.16	1.21	0.99	0.96	1.13	1.07	1.12	0.115	1053	0.0862	0.855	0.984	0.827	1	-0.067	0.235	0.746
ONC0000744	GSK163090	Phase 2	serotonin receptor antagonist	HTR1A|HTR1B|HTR1D			0.99	1	1.19	1.03	0.98	0.97	1.06	0.113	0.993	0.0321	0.684	0.925	0.507	0.957	-0.067	0.208	0.718
ONC0000257	DR-4485	Preclinical	serotonin receptor antagonist	HTR7			1	0.86	0.96	0.92	0.89	0.81	0.94	0.0721	0.873	0.0569	0.249	0.706	0.0336	0.195	-0.067	0.14	0.651
ONC0002457	D-PHENYLALANINE	Preclinical	enkephalinase inhibitor	CCBL1|CRH|HCAR3			1.04	1.06	0.94	0.91	0.94	0.99	1013	0.0643	0.947	0.0404	0.512	0.856	0.242	0.735	-0.067	0.108	0.621
ONC0002573	dizocilpine-(-) maleate	NA	NA	NA	NA	NA	1.15	1.35	0.81	1	1.13	0.98	1103	0.273	1037	0.0814	0.815	0.972	0.754	1	-0.067	0.36	0.85
ONC0002401	BROXALDINE	Preclinical					0.9	1.07	1.1	0.91	0.99	0.97	1023	0.108	0.957	0.0416	0.55	0.868	0.292	0.806	-0.067	0.201	0.71
ONC0002439	ACYCLOVIR	Launched	DNA polymerase inhibitor	PNP	infectious disease	genitial herpes|shingles|chicken pox	0.92	0.9	1.02	1.03	0.62	0.99	0.947	0.0643	0.88	0.226	0.27	0.728	0.042	0.232	-0.067	0.333	0.839
ONC0002716	HEMADO	Preclinical	adenosine receptor agonist	ADORA1|ADORA2A|ADORA2B|ADORA3			1.13	1.03	1.02	1	0.99	0.99	1.06	0.0608	0.993	0.00577	0.684	0.925	0.507	0.957	-0.067	0.0986	0.611
ONC0001072	Faropenem daloxate	NA	NA	NA	NA	NA	1.27	1.01	1.03	1.21	0.91	0.99	1103	0.145	1037	0.155	0.815	0.972	0.754	1	-0.067	0.308	0.819
ONC0001592	A-769662	Preclinical	AMPK activator				0.93	1.09	0.99	1.14	0.89	0.78	1003	0.0808	0.937	0.184	0.473	0.837	0.196	0.658	-0.067	0.305	0.817
ONC0000156	adiporon	Preclinical	adiponectin receptor agonist	ADIPOR1|ADIPOR2			1.05	1.02	0.99	0.99	0.81	1.06	1.02	0.03	0.953	0.129	0.537	0.863	0.275	0.784	-0.067	0.234	0.744
ONC0005549	isocarboxazid	Launched	monoamine oxidase inhibitor	MAOA|MAOB	neurology/psychiatry	depression	1.06	1.17	0.99	0.99	1.04	0.99	1073	0.0907	1007	0.0289	0.728	0.942	0.588	0.993	-0.067	0.166	0.683
ONC0005609	caroverine	NA	NA	NA	NA	NA	1.11	1.12	0.76	1	0.95	0.84	0.997	0.205	0.93	0.0819	0.448	0.825	0.169	0.607	-0.067	0.321	0.83
ONC0001429	3-alpha-bis-(4-fluorophenyl)-methoxytropane	Preclinical	dopamine uptake inhibitor	CHRM1|SLC6A2|SLC6A3|SLC6A4			1.02	1.24	0.66	0.95	0.85	0.92	0.973	0.293	0.907	0.0513	0.361	0.778	0.0939	0.419	-0.067	0.367	0.852
ONC0003131	AC-7954-(+/-)	Preclinical	urotensin receptor agonist	UTS2R			1.22	0.96	1.04	1.05	0.88	1.09	1073	0.133	1007	0.112	0.728	0.942	0.588	0.993	-0.067	0.272	0.781
ONC0000538	SURAMIN HEXASODIUM	NA	NA	NA	NA	NA	0.95	0.98	1.17	1	0.83	1.07	1033	0.119	0.967	0.123	0.588	0.885	0.347	0.857	-0.067	0.269	0.776
ONC0000493	ORPHENADRINE CITRATE	NA	NA	NA	NA	NA	0.98	1.05	1.04	1.09	1.04	0.74	1023	0.0379	0.957	0.189	0.55	0.868	0.292	0.806	-0.067	0.303	0.816
ONC0000592	TRANEXAMIC ACID	NA	NA	NA	NA	NA	1.19	0.95	0.94	0.9	0.98	1	1027	0.142	0.96	0.0529	0.563	0.874	0.31	0.826	-0.067	0.255	0.762
ONC0000084	5-carboxamidotryptamine	Preclinical	serotonin receptor agonist	HTR1A|HTR1B|HTR1D|HTR1E|HTR1F|HTR2A|HTR2B|HTR2C|HTR5A|HTR6|HTR7			0.97	1.16	1.05	0.92	1.01	1.05	1.06	0.0954	0.993	0.0666	0.684	0.925	0.507	0.957	-0.067	0.192	0.705
ONC0002038	T-5224	Phase 2	AP inhibitor	JUN			1.18	1.2	1.01	1.14	1.04	1.01	1.13	0.104	1063	0.0681	0.876	0.99	0.864	1	-0.067	0.207	0.717
ONC0001873	GSK-J2	Preclinical	histone demethylase inhibitor				1.09	1.04	1.11	0.98	1.07	0.99	1.08	0.0361	1013	0.0493	0.749	0.947	0.628	1	-0.067	0.0692	0.565
ONC0000934	AZ505 (ditrifluoroacetate)	NA	NA	NA	NA	NA	1	0.93	0.83	0.79	0.84	0.93	0.92	0.0854	0.853	0.0709	0.192	0.64	0.0162	0.106	-0.067	0.18	0.695
ONC0001911	7-hydroxy-PIPAT	Preclinical	dopamine receptor ligand	DRD3			0.91	1.05	0.98	0.86	1.13	0.75	0.98	0.07	0.913	0.196	0.385	0.789	0.112	0.472	-0.067	0.312	0.822
ONC0001948	1-(3-Chlorophenyl)piperazineHCl	NA	NA	NA	NA	NA	1.03	1.04	1.06	0.99	0.92	1.02	1043	0.0153	0.977	0.0513	0.625	0.903	0.406	0.902	-0.067	0.0722	0.573
ONC0005388	cinepazet	Launched	vasodilator				0.93	1.24	1	0.97	1.01	0.99	1057	0.163	0.99	0.02	0.673	0.923	0.487	0.945	-0.067	0.276	0.787
ONC0002929	2-aminobenzenesulfonamide	Preclinical	carbonic anhydrase inhibitor	CA12|CA14|CA2|CA6|CA9			1.13	1.23	1.27	1.03	1.34	1.06	1.21	0.0721	1143	0.171	0.973	1	0.99	1	-0.067	0.291	0.804
ONC0005423	pipotiazine-palmitate	Launched	dopamine receptor antagonist|serotonin receptor antagonist	DRD1|DRD2|HTR1A|HTR2A	neurology/psychiatry	schizophrenia	0.95	1.01	1.22	0.93	1	1.05	1.06	0.142	0.993	0.0603	0.684	0.925	0.507	0.957	-0.067	0.257	0.766
ONC0001183	Diclofensine (hydrochloride)	NA	NA	NA	NA	NA	1.17	1.12	1	1.13	1.14	0.82	1097	0.0874	1.03	0.182	0.797	0.966	0.72	1	-0.067	0.304	0.817
ONC0004837	PMSF (Phenylmethylsulfonyl Fluoride)	NA	NA	NA	NA	NA	0.84	1.34	1.08	1.08	1.02	0.97	1087	0.25	1023	0.0551	0.769	0.954	0.684	1	-0.063	0.353	0.85
ONC0004701	BMS 299897	NA	NA	NA	NA	NA	0.98	0.87	1.39	1.09	0.99	0.97	1.08	0.274	1017	0.0643	0.749	0.947	0.647	1	-0.063	0.366	0.852
ONC0002154	secoisolariciresinol-(-)	Phase 2					0.97	1.41	0.56	0.86	0.93	0.96	0.98	0.425	0.917	0.0513	0.385	0.789	0.122	0.499	-0.063	0.411	0.887
ONC0004135	substance-p	Phase 1	neurokinin receptor antagonist	TACR1|TACR2|TACR3			1	1.16	1.18	1.11	1	1.04	1113	0.0987	1.05	0.0557	0.84	0.979	0.814	1	-0.063	0.201	0.71
ONC0003753	CGP-60474	Preclinical	CDK inhibitor	CDK1|CDK2			-0.12	0.18	-0.1	0.05	-0.15	-0.13	-0.013	0.168	-0.077	0.11	3.17e-23	6.61e-21	3.27e-61	1.84e-58	-0.063	0.309	0.82
ONC0004064	LORNOXICAM	Launched	cyclooxygenase inhibitor	PTGS1|PTGS2	rheumatology|neurology/psychiatry	osteoarthritis|sciata	1.09	1.33	1	1.09	1.14	1	1.14	0.171	1077	0.0709	0.894	0.998	0.904	1	-0.063	0.3	0.813
ONC0003699	amflutizole	Phase 2	xanthine oxidase inhibitor	XDH			0.89	0.84	1.03	0.94	0.71	0.92	0.92	0.0985	0.857	0.127	0.192	0.64	0.0184	0.118	-0.063	0.268	0.774
[truncated: 3,616 more rows]

## Sheet: Hit selection
Compound_Id	onc.name	rep.clinical_phase	rep.moa	rep.target	rep.disease_area	rep.indication	c_r1	c_r2	c_r3	b_r1	b_r2	b_r3	c_mean	c_sd	b_mean	b_sd	c_mean_pvalue	c_mean_fdr	b_mean_pvalue	b_mean_fdr	b,c_diff	b,c_pvalue	b,c_fdr
ONC0001980	Elbasvir	Launched	HCV inhibitor		infectious disease	hepatitis C	1.39	1.2	1.19	0.35	0.25	0.27	1.26	0.113	0.29	0.0529	0.992	1	1.44e-27	3.98e-26	-0.97	0.000579	0.151
ONC0001757	TC-G-1004	Preclinical	adenosine receptor antagonist	ADORA2A			1.15	1.21	1.31	0.25	0.18	0.42	1223	0.0808	0.283	0.123	0.98	1	4.66e-28	1.33e-26	-0.94	0.000412	0.136
ONC0000012	JNJ-10397049	Preclinical	orexin receptor antagonist	HCRTR1|HCRTR2			1.17	1.1	1.33	0.42	0.3	0.33	1.2	0.118	0.35	0.0624	0.966	1	2.25e-23	5.5e-22	-0.85	0.00075	0.151
ONC0002862	NICLOSAMIDE	Launched	DNA replication inhibitor|STAT inhibitor	STAT3	infectious disease	tapeworm	1.39	1.16	1.45	0.64	0.42	0.4	1333	0.153	0.487	0.133	0.999	1	3.43e-15	6.31e-14	-0.847	0.00105	0.153
ONC0001907	RS-39604	Preclinical	serotonin receptor antagonist	HTR4			1.29	1.13	1.18	0.53	0.39	0.23	1.2	0.0819	0.383	0.15	0.966	1	3.33e-21	7.96e-20	-0.817	0.00165	0.157
ONC0000733	Flumatinib (mesylate)	NA	NA	NA	NA	NA	1.31	0.99	1.05	0.12	0.36	0.43	1117	0.17	0.303	0.163	0.847	0.98	1.32e-26	3.58e-25	-0.813	0.00197	0.172
ONC0000957	BAY 61-3606 (dihydrochloride)	NA	NA	NA	NA	NA	1.49	0.92	1.09	0.35	0.27	0.45	1167	0.293	0.357	0.0902	0.934	1	6.24e-23	1.52e-21	-0.81	0.0159	0.349
ONC0000149	GW-583340	Preclinical	EGFR inhibitor	EGFR|ERBB2			1.16	1.1	0.94	0.22	0.23	0.35	1067	0.114	0.267	0.0723	0.707	0.935	2.67e-29	8.08e-28	-0.8	0.000566	0.151
ONC0001070	Elacridar	Phase 1	P glycoprotein inhibitor	ABCB1			1.09	1.11	1.2	0.23	0.53	0.29	1133	0.0586	0.35	0.159	0.882	0.993	2.25e-23	5.5e-22	-0.783	0.00364	0.223
ONC0001569	RWJ-50271	Preclinical	integrin inhibitor	ICAM1			1.3	1.26	1.26	0.58	0.46	0.53	1273	0.0231	0.523	0.0603	0.994	1	2.56e-13	4.26e-12	-0.75	0.000334	0.134
ONC0000723	Afatinib (dimaleate)	NA	NA	NA	NA	NA	0.72	0.82	0.6	-0.05	0.05	-0.03	0.713	0.11	-0.01	0.0529	0.00212	0.0302	4.54e-54	1.02e-51	-0.723	0.00118	0.153
ONC0001882	SLx-2119	NA	NA	NA	NA	NA	0.93	0.91	0.98	0.14	0.2	0.32	0.94	0.0361	0.22	0.0917	0.249	0.706	6.28e-33	2.25e-31	-0.72	0.00104	0.153
ONC0001398	gefitinib	Launched	EGFR inhibitor	EGFR	oncology	non-small cell lung cancer (NSCLC)	1.22	1.34	1.14	0.5	0.54	0.51	1233	0.101	0.517	0.0208	0.984	1	1.2e-13	2.03e-12	-0.717	0.00249	0.186
ONC0005411	VX-11e	Preclinical	MAP kinase inhibitor	MAPK1			0.92	0.88	0.82	0.14	0.19	0.15	0.873	0.0503	0.16	0.0265	0.0936	0.451	6.39e-38	3.19e-36	-0.713	0.000101	0.0897
ONC0002534	ZK-93423	Phase 3	benzodiazepine receptor agonist	GABRA1|GABRA2|GABRA3|GABRA5|GABRB2|GABRG2			1.36	1.24	1.3	0.73	0.61	0.43	1.3	0.06	0.59	0.151	0.997	1	2.91e-10	4.33e-09	-0.71	0.00379	0.227
ONC0001942	MK-2295	Phase 2	TRPV antagonist	TRPV1			0.77	1	1.53	0.35	0.43	0.42	1.1	0.39	0.4	0.0436	0.806	0.968	3.68e-20	8.37e-19	-0.7	0.0439	0.493
ONC0001702	reversan	Preclinical	MRP inhibitor	ABCC1			1.06	1.15	1.05	0.42	0.37	0.43	1087	0.0551	0.407	0.0321	0.769	0.954	9.46e-20	2.09e-18	-0.68	0.000112	0.0897
ONC0005098	MK-2461	Phase 1/Phase 2	FGFR inhibitor|VEGFR inhibitor	FGFR1|FGFR2|FGFR3|FLT1|FLT3|FLT4|KDR|MERTK|MET|MST1R|NTRK1|NTRK2|PDGFRB			0.93	1.58	1.75	0.84	0.65	0.75	1.42	0.433	0.747	0.095	1	1	7.79e-05	0.000786	-0.673	0.0542	0.53
ONC0001850	APY0201	Preclinical	phosphoinositide dependent kinase inhibitor	IL12A|IL12B|PIKFYVE			0.67	0.58	0.58	-0.03	-0.09	-0.07	0.61	0.052	-0.063	0.0306	5.79e-05	0.00121	9.53e-60	4.88e-57	-0.673	9.34e-05	0.0897
ONC0001828	WAY-207024	Preclinical	gonadotropin releasing factor hormone receptor antagonist	GNRHR|HRH2|TACR2			1.59	0.9	1.09	0.55	0.56	0.46	1193	0.356	0.523	0.0551	0.961	1	2.56e-13	4.26e-12	-0.67	0.0397	0.471
ONC0001215	BRD4770	Preclinical	histone lysine methyltransferase inhibitor	EHMT2			0.79	0.92	1.19	0.31	0.32	0.3	0.967	0.204	0.31	0.01	0.337	0.769	3.95e-26	1.05e-24	-0.657	0.0152	0.342
ONC0004418	GSK2578215A	Preclinical	leucine rich repeat kinase inhibitor	LRRK2			1.22	1.03	0.94	0.53	0.31	0.39	1063	0.143	0.41	0.111	0.695	0.93	1.51e-19	3.29e-18	-0.653	0.00203	0.173
ONC0000024	GNF-5837	Preclinical	growth factor receptor inhibitor	NTRK1|NTRK2|NTRK3			0.92	0.94	1.28	0.41	0.34	0.44	1047	0.202	0.397	0.0513	0.637	0.909	2.29e-20	5.31e-19	-0.65	0.0125	0.318
ONC0005255	NVP-TAE226	Preclinical	protein tyrosine kinase inhibitor	PTK2			0.59	1.03	0.86	0.14	0.17	0.25	0.827	0.222	0.187	0.0569	0.0385	0.274	1.18e-35	4.94e-34	-0.64	0.0156	0.347
ONC0002082	G007-LK	Preclinical	tankyrase inhibitor	TNKS|TNKS2			1.09	0.95	0.87	0.27	0.34	0.38	0.97	0.111	0.33	0.0557	0.349	0.774	9.87e-25	2.54e-23	-0.64	0.00161	0.157
ONC0005018	Varlitinib	NA	NA	NA	NA	NA	1.15	0.78	0.99	0.43	0.26	0.34	0.973	0.186	0.343	0.085	0.361	0.778	8.01e-24	2e-22	-0.63	0.00758	0.283
ONC0000856	BMS-599626	Phase 1	EGFR inhibitor|protein tyrosine kinase inhibitor	EGFR|ERBB2|ERBB4			0.92	1.06	1.16	0.4	0.54	0.31	1047	0.121	0.417	0.116	0.637	0.909	3.81e-19	8.13e-18	-0.63	0.00143	0.154
ONC0000072	SB-216641	Preclinical	serotonin receptor antagonist	HTR1A|HTR1B|HTR1D|HTR2A|HTR2B|HTR2C			1.2	1	0.99	0.42	0.35	0.53	1063	0.118	0.433	0.0907	0.695	0.93	3.7e-18	7.6e-17	-0.63	0.0012	0.153
ONC0001315	Ko 143	NA	NA	NA	NA	NA	1	1.24	1.26	0.53	0.53	0.58	1167	0.145	0.547	0.0289	0.934	1	3.38e-12	5.45e-11	-0.62	0.00742	0.283
ONC0005149	CC-292 (AVL-292)	NA	NA	NA	NA	NA	0.96	0.73	0.79	0.14	0.44	0.08	0.827	0.119	0.22	0.193	0.0385	0.274	6.28e-33	2.25e-31	-0.607	0.00747	0.283
ONC0002430	Sunitinib	Launched	FLT3 inhibitor|KIT inhibitor|PDGFR tyrosine kinase receptor inhibitor|RET tyrosine kinase inhibitor|VEGFR inhibitor	CSF1R|FGFR1|FLT1|FLT3|FLT4|KDR|KIT|PDGFRA|PDGFRB|RET	oncology	gastrointestinal stromal tumors (GIST)|renal cell carcinoma (RCC)|neuroendocrine tumors of pancreatic origin (PNET)	1.23	0.91	0.71	0.41	0.28	0.34	0.95	0.262	0.343	0.0651	0.281	0.736	8.01e-24	2e-22	-0.607	0.0249	0.395
ONC0001017	SR-3306	Preclinical	JNK inhibitor	MAPK10|MAPK8|MAPK9			0.98	0.98	0.71	0.35	0.29	0.22	0.89	0.156	0.287	0.0651	0.123	0.519	8.19e-28	2.29e-26	-0.603	0.00589	0.26
ONC0005067	A-674563	Preclinical	AKT inhibitor	AKT1|PKIA|PRKACA			1.16	1.42	1.07	0.72	0.57	0.58	1217	0.182	0.623	0.0839	0.977	1	6.67e-09	9.12e-08	-0.593	0.00835	0.293
ONC0002247	Rimiducid	NA	NA	NA	NA	NA	1.18	1.13	1.15	0.48	0.6	0.6	1153	0.0252	0.56	0.0693	0.916	1	1.39e-11	2.19e-10	-0.593	0.000946	0.153
ONC0000079	TC-ASK-10	Preclinical	MAP kinase inhibitor	MAP3K5|MAP3K6			0.67	1.25	0.88	0.26	0.35	0.41	0.933	0.294	0.34	0.0755	0.229	0.688	4.76e-24	1.2e-22	-0.593	0.0324	0.427
ONC0004706	Regorafenib (BAY 73-4506)	NA	NA	NA	NA	NA	1.1	1.1	1.85	0.78	0.68	0.82	1.35	0.433	0.76	0.0721	0.999	1	0.000174	0.00168	-0.59	0.0694	0.565
ONC0004624	Nilotinib (AMN-107)	NA	NA	NA	NA	NA	0.97	0.93	1.11	0.32	0.47	0.45	1003	0.0945	0.413	0.0814	0.473	0.837	2.4e-19	5.18e-18	-0.59	0.000663	0.151
ONC0004965	AST-1306	Phase 1	EGFR inhibitor	EGFR|ERBB2			0.83	0.99	0.98	0.39	0.28	0.37	0.933	0.0896	0.347	0.0586	0.229	0.688	1.34e-23	3.32e-22	-0.587	0.000687	0.151
ONC0002997	PQ-401	Preclinical	IGF-1 inhibitor	IGF1R			1.12	0.78	1.03	0.28	0.53	0.36	0.977	0.176	0.39	0.128	0.373	0.785	8.79e-21	2.06e-19	-0.587	0.00593	0.26
ONC0003128	UNC-3230	Preclinical	phosphatidyl-inositol activator	PIP5K1C			0.74	1.17	1.51	0.59	0.46	0.62	1.14	0.386	0.557	0.085	0.894	0.998	9.82e-12	1.56e-10	-0.583	0.057	0.538
ONC0000825	neurodazine	Preclinical	neurogenesis of non-pluripotent C2C12 myoblast inducer				1.14	1.01	1.01	0.51	0.48	0.44	1053	0.0751	0.477	0.0351	0.661	0.916	1e-15	1.88e-14	-0.577	0.000801	0.151
ONC0003581	SIS3	Preclinical	serine/threonine kinase inhibitor	SMAD3|TGFBR1			1.23	1.02	1.09	0.58	0.5	0.54	1113	0.107	0.54	0.04	0.84	0.979	1.64e-12	2.66e-11	-0.573	0.00292	0.198
ONC0003984	LUFENURON	Launched	chitin inhibitor		infectious disease	flea control	1.39	1.25	1.18	0.78	0.67	0.65	1273	0.107	0.7	0.07	0.994	1	3.39e-06	3.85e-05	-0.573	0.00133	0.154
ONC0000455	METHOTREXATE HYDRATE	NA	NA	NA	NA	NA	0.89	0.96	0.84	0.26	0.41	0.3	0.897	0.0603	0.323	0.0777	0.137	0.55	3.41e-25	8.81e-24	-0.573	0.000364	0.136
ONC0004383	HER2 Inhibitor 1	NA	NA	NA	NA	NA	1.24	0.67	0.95	0.35	0.44	0.36	0.953	0.285	0.383	0.0493	0.292	0.741	3.33e-21	7.96e-20	-0.57	0.0351	0.444
ONC0004908	Amuvatinib (MP-470)	NA	NA	NA	NA	NA	0.69	1.09	0.93	0.28	0.4	0.32	0.903	0.201	0.333	0.0611	0.152	0.577	1.67e-24	4.24e-23	-0.57	0.0152	0.342
ONC0003029	GNF-7	Preclinical	glucokinase inhibitor|protein kinase inhibitor	GCK|TNK2			0.98	1	0.8	0.28	0.36	0.44	0.927	0.11	0.36	0.08	0.21	0.668	1.03e-22	2.5e-21	-0.567	0.00138	0.154
ONC0001380	Ilginatinib hydrochloride	NA	NA	NA	NA	NA	1.04	1.7	1.11	0.65	0.73	0.77	1283	0.363	0.717	0.0611	0.996	1	1.1e-05	0.00012	-0.567	0.0549	0.532
ONC0004319	SGC-CBP30	Preclinical	bromodomain inhibitor	CREBBP|EP300			0.97	0.86	1.11	0.44	0.43	0.4	0.98	0.125	0.423	0.0208	0.385	0.789	9.54e-19	2.03e-17	-0.557	0.00726	0.282
ONC0005144	PD168393	Preclinical	EGFR inhibitor	EGFR|ERBB2|SRC			0.78	0.99	0.7	0.19	0.48	0.13	0.823	0.15	0.267	0.187	0.0359	0.264	2.67e-29	8.08e-28	-0.557	0.00869	0.293
ONC0005005	RAF265 (CHIR-265)	NA	NA	NA	NA	NA	1.49	1.19	1.67	0.97	0.68	1.04	1.45	0.242	0.897	0.191	1	1	0.0706	0.343	-0.553	0.0194	0.37
ONC0004656	TG101209	Preclinical	JAK inhibitor	JAK2|JAK3			0.93	0.95	1.02	0.39	0.34	0.51	0.967	0.0473	0.413	0.0874	0.337	0.769	2.4e-19	5.18e-18	-0.553	0.00106	0.153
ONC0002613	L-168049	Preclinical	glucagon receptor antagonist	GCGR			1.17	0.83	1.14	0.53	0.53	0.42	1047	0.188	0.493	0.0635	0.637	0.909	7.69e-15	1.39e-13	-0.553	0.0133	0.321
ONC0001698	SB-243213	Phase 1	serotonin receptor inverse agonist	HTR2A|HTR2B|HTR2C|HTR6			1.09	1	1.07	0.47	0.57	0.46	1053	0.0473	0.5	0.0608	0.661	0.916	1.71e-14	3e-13	-0.553	0.000169	0.119
ONC0002673	A-784168	Preclinical	transient receptor potential channel antagonist	TRPV1			0.89	0.94	1.32	0.49	0.53	0.49	1.05	0.235	0.503	0.0231	0.649	0.915	2.53e-14	4.43e-13	-0.547	0.0276	0.407
ONC0003340	MANNITOL	NA	NA	NA	NA	NA	1.46	1.44	1.11	0.71	0.77	0.89	1337	0.197	0.79	0.0917	0.999	1	0.000922	0.00813	-0.547	0.0125	0.318
ONC0003574	KRCA-0008	Preclinical	ALK inihibitor	ALK			1	0.94	1.1	0.49	0.49	0.44	1013	0.0808	0.473	0.0289	0.512	0.856	6.62e-16	1.25e-14	-0.54	0.00179	0.165
ONC0001967	Ledipasvir	Launched	HCV inhibitor		infectious disease	hepatitis C	0.95	0.73	0.84	0.2	0.33	0.37	0.84	0.11	0.3	0.0889	0.0505	0.324	7.61e-27	2.08e-25	-0.54	0.00158	0.156
ONC0005274	AZD8330	Phase 1	MEK inhibitor	MAP3K1			0.7	0.78	0.94	0.17	0.23	0.41	0.807	0.122	0.27	0.125	0.025	0.207	4.75e-29	1.42e-27	-0.537	0.00301	0.198
ONC0002671	cisapride	Withdrawn	serotonin receptor agonist	HTR2A|HTR3A|HTR4|KCNH2			1.17	1.15	1.11	0.61	0.64	0.57	1143	0.0306	0.607	0.0351	0.9	0.998	1.44e-09	2.09e-08	-0.537	2.14e-05	0.0897
ONC0001004	E 2012	NA	NA	NA	NA	NA	1.01	1.08	0.97	0.52	0.47	0.46	1.02	0.0557	0.483	0.0321	0.537	0.863	2.28e-15	4.23e-14	-0.537	0.000252	0.119
ONC0004526	YM201636	Preclinical	PI3K inhibitor				0.91	1.3	0.89	0.27	0.64	0.6	1033	0.231	0.503	0.203	0.588	0.885	2.53e-14	4.43e-13	-0.53	0.0207	0.37
ONC0004464	SR-3576	Preclinical	JNK inhibitor	MAPK10			1.6	1.33	0.74	0.69	0.81	0.58	1223	0.44	0.693	0.115	0.98	1	2.08e-06	2.41e-05	-0.53	0.0827	0.587
ONC0000994	URMC-099	Preclinical	mixed lineage kinase inhibitor	CDKL2|DAPK3|FLT3|LRRK2|MAP3K10|MAP3K11|MAP3K2|MAP3K9|SRPK2			1.15	0.93	0.99	0.54	0.49	0.45	1023	0.114	0.493	0.0451	0.55	0.868	7.69e-15	1.39e-13	-0.53	0.00388	0.23
ONC0004502	Erlotinib(OSI-744)	NA	NA	NA	NA	NA	1.13	1.38	1.09	0.52	0.67	0.83	1.2	0.157	0.673	0.155	0.966	1	4.52e-07	5.48e-06	-0.527	0.00724	0.282
ONC0002037	Capadenoson	Phase 2	adenosine receptor agonist	ADORA1			0.76	1.27	0.77	0.39	0.42	0.41	0.933	0.292	0.407	0.0153	0.229	0.688	9.46e-20	2.09e-18	-0.527	0.0442	0.493
ONC0002952	prenylamine	Withdrawn	calcium channel blocker				1.16	1.76	1.46	0.92	0.89	0.99	1.46	0.3	0.933	0.0513	1	1	0.182	0.63	-0.527	0.0446	0.493
ONC0005034	AG-1478 (Tyrphostin AG-1478)	NA	NA	NA	NA	NA	1.31	1.53	1.01	0.84	0.71	0.73	1283	0.261	0.76	0.07	0.996	1	0.000174	0.00168	-0.523	0.0326	0.427
ONC0001489	YM-90709	Preclinical	IL5 inhibitor	CSF2RB|IL5RA			0.74	1.16	0.96	0.53	0.44	0.32	0.953	0.21	0.43	0.105	0.292	0.741	2.36e-18	4.94e-17	-0.523	0.0159	0.349
ONC0002481	PF-431396	Preclinical	focal adhesion kinase inhibitor	PTK2|PTK2B			0.75	0.98	1.14	0.55	0.43	0.33	0.957	0.196	0.437	0.11	0.303	0.751	5.78e-18	1.18e-16	-0.52	0.0127	0.318
ONC0001261	Mps-BAY-2a	Preclinical	monopolar spindle 1 kinase inhibitor	TTK			0.8	0.92	1.07	0.44	0.34	0.45	0.93	0.135	0.41	0.0608	0.22	0.682	1.51e-19	3.29e-18	-0.52	0.00558	0.26
ONC0004332	TAK-285	Phase 1	EGFR inhibitor	ERBB2			1.09	1.21	1.5	0.78	0.72	0.76	1267	0.211	0.753	0.0306	0.993	1	0.000117	0.00115	-0.513	0.0246	0.394
ONC0004610	Lapatinib (GW-572016) Ditosylate	NA	NA	NA	NA	NA	0.89	1.12	0.68	0.32	0.37	0.47	0.897	0.22	0.387	0.0764	0.137	0.55	5.42e-21	1.28e-19	-0.51	0.0223	0.379
ONC0000227	HKI-357	Phase 1	EGFR inhibitor	EGFR			1.11	0.94	1.11	0.51	0.64	0.48	1053	0.0981	0.543	0.085	0.661	0.916	2.35e-12	3.81e-11	-0.51	0.00131	0.154
ONC0001097	KHK-IN-1 (hydrochloride)	NA	NA	NA	NA	NA	1.03	1.01	1.08	0.56	0.54	0.49	1.04	0.0361	0.53	0.0361	0.613	0.897	5.42e-13	8.92e-12	-0.51	3.26e-05	0.0897
ONC0004203	CANDESARTAN	Launched	angiotensin receptor antagonist	AGTR1	cardiology	hypertension|congestive heart failure	1.32	1.25	1.74	0.86	1.07	0.86	1437	0.265	0.93	0.121	1	1	0.169	0.607	-0.507	0.0312	0.42
ONC0002529	A-1070722	Preclinical	glycogen synthase kinase inhibitor	GSK3A|GSK3B			1.05	0.77	1.01	0.52	0.58	0.21	0.943	0.151	0.437	0.199	0.26	0.717	5.78e-18	1.18e-16	-0.507	0.0137	0.326
ONC0002409	Ozanimod	Phase 3	sphingosine 1-phosphate receptor agonist	S1PR1			0.98	1.24	1.04	0.58	0.55	0.61	1087	0.136	0.58	0.03	0.769	0.954	1.08e-10	1.63e-09	-0.507	0.00964	0.295
ONC0001389	GS-6201	Phase 1	adenosine receptor antagonist	ADORA1|ADORA2A|ADORA2B|ADORA3			1.28	1.19	1.04	0.61	0.52	0.86	1.17	0.121	0.663	0.176	0.938	1	2.04e-07	2.56e-06	-0.507	0.00943	0.295
ONC0001361	ZM-323881	Preclinical	VEGFR inhibitor	KDR			0.9	0.96	1.35	0.44	0.59	0.66	1.07	0.244	0.563	0.112	0.717	0.938	1.97e-11	3.06e-10	-0.507	0.0258	0.397
ONC0001434	SB-228357	Preclinical	serotonin receptor antagonist	HTR2A|HTR2B|HTR2C			1.08	0.85	0.59	0.41	0.38	0.21	0.84	0.245	0.333	0.108	0.0505	0.324	1.67e-24	4.24e-23	-0.507	0.0264	0.4
ONC0000069	AZ-628	Preclinical	RAF inhibitor	BRAF|RAF1			0.7	0.97	0.61	0.31	0.22	0.23	0.76	0.187	0.253	0.0493	0.00797	0.0869	2.59e-30	8.04e-29	-0.507	0.0177	0.356
ONC0001721	SB-334867	Preclinical	orexin receptor antagonist	HCRTR1|HCRTR2			0.94	0.94	0.72	0.38	0.37	0.33	0.867	0.127	0.36	0.0265	0.0834	0.429	1.03e-22	2.5e-21	-0.507	0.0085	0.293
ONC0005160	BMS-833923 (XL139)	NA	NA	NA	NA	NA	1.26	1.03	1.11	0.54	0.59	0.76	1133	0.117	0.63	0.115	0.882	0.993	1.21e-08	1.63e-07	-0.503	0.00302	0.198
ONC0002896	PERHEXILINE MALEATE	NA	NA	NA	NA	NA	1.73	1.34	1.04	0.8	1.07	0.73	1.37	0.346	0.867	0.18	1	1	0.0266	0.161	-0.503	0.0556	0.532
ONC0001643	WYE-687	Preclinical	mTOR inhibitor	MTOR			0.65	0.9	0.88	0.3	0.26	0.36	0.81	0.139	0.307	0.0503	0.0269	0.219	2.29e-26	6.13e-25	-0.503	0.00782	0.288
ONC0004473	altanserin	Phase 2	serotonin receptor antagonist	HTR2A			1.45	1.26	1.52	0.95	0.95	0.83	1.41	0.135	0.91	0.0693	1	1	0.103	0.446	-0.5	0.00534	0.253
ONC0004448	Lonafarnib (SCH66336)	NA	NA	NA	NA	NA	1.06	0.97	0.86	0.5	0.36	0.53	0.963	0.1	0.463	0.0907	0.326	0.763	1.87e-16	3.59e-15	-0.5	0.00157	0.156
ONC0003517	Tryptanthrin	Preclinical	cyclooxygenase inhibitor	IDO1			0.91	1.24	1.04	0.58	0.47	0.64	1063	0.166	0.563	0.0862	0.695	0.93	1.97e-11	3.06e-10	-0.5	0.00949	0.295
ONC0003775	BIBU-1361	Preclinical	EGFR inhibitor	EGFR			1.01	0.92	1.12	0.55	0.47	0.54	1017	0.1	0.52	0.0436	0.525	0.861	1.75e-13	2.95e-12	-0.497	0.00296	0.198
ONC0005097	NVP-BSK805 2HCl	NA	NA	NA	NA	NA	1.53	1.27	1.41	0.89	0.95	0.88	1403	0.13	0.907	0.0379	1	1	0.0939	0.419	-0.497	0.00803	0.29
ONC0000908	Eupatilin	Launched	mucus protecting agent				1.12	1.59	1.29	1	0.59	0.94	1333	0.238	0.843	0.221	0.999	1	0.0109	0.0753	-0.49	0.0298	0.417
ONC0000189	GNF-2	Preclinical	Bcr-Abl kinase inhibitor	ABL1|BCR			1.18	1.05	1.16	0.74	0.64	0.55	1.13	0.07	0.643	0.095	0.876	0.99	3.86e-08	5.08e-07	-0.487	0.00139	0.154
ONC0002390	TERCONAZOLE	Launched	sterol demethylase inhibitor		infectious disease	vulvovaginal candidiasis	1.43	1.26	1.52	0.79	0.95	1.01	1403	0.132	0.917	0.114	1	1	0.122	0.499	-0.487	0.00444	0.238
ONC0003093	T-5601640	Preclinical	LIM kinase inhibitor	LIMK2			0.98	1	0.89	0.55	0.48	0.38	0.957	0.0586	0.47	0.0854	0.303	0.751	4.36e-16	8.23e-15	-0.487	0.00103	0.153
ONC0001229	BVT 2733	NA	NA	NA	NA	NA	1.53	1.18	1.11	0.72	0.83	0.81	1273	0.225	0.787	0.0586	0.994	1	0.000774	0.00688	-0.487	0.0282	0.408
ONC0005078	SNX-2112	Phase 1	HSP inhibitor				0.46	0.52	0.74	0.21	0.05	0.03	0.573	0.147	0.097	0.0987	1.29e-05	0.000302	1.37e-43	1.01e-41	-0.477	0.00663	0.275
ONC0005012	R406(free base)	NA	NA	NA	NA	NA	1.06	1.2	1.47	0.77	0.8	0.73	1243	0.208	0.767	0.0351	0.988	1	0.000257	0.00241	-0.477	0.0273	0.406
ONC0002845	FLOXURIDINE	Launched	DNA synthesis inhibitor	TYMS	oncology	colorectal cancer	1.06	1	1.1	0.55	0.66	0.52	1053	0.0503	0.577	0.0737	0.661	0.916	7.74e-11	1.17e-09	-0.477	0.000671	0.151
ONC0004591	BX-795	Preclinical	IKK inhibitor	CDK2|CHEK1|GSK3B|KDR|PDK1|PDPK1			1.04	1.26	1.27	0.67	0.79	0.69	1.19	0.13	0.717	0.0643	0.958	1	1.1e-05	0.00012	-0.473	0.00587	0.26
ONC0002585	RS-67506	Preclinical	serotonin receptor partial agonist	HTR4			1.52	1.18	1.3	0.6	0.99	0.99	1333	0.172	0.86	0.225	0.999	1	0.0209	0.132	-0.473	0.0241	0.391
ONC0000136	tosedostat	Phase 2	peptidase inhibitor	ANPEP|LAP3|NPEPPS			0.5	0.58	0.84	0.15	0.2	0.16	0.64	0.178	0.17	0.0265	0.000181	0.0035	4.61e-37	2.09e-35	-0.47	0.0209	0.37
ONC0000804	Litronesib	Phase 2	kinesin-like spindle protein inhibitor	KIF11			0.5	0.53	0.73	0.11	0.14	0.1	0.587	0.125	0.117	0.0208	2.26e-05	0.00051	9.35e-42	5.92e-40	-0.47	0.0102	0.296
ONC0000753	brefeldin-a	Preclinical	protein synthesis inhibitor	ARF1|CYTH2			0.28	0.2	0.36	-0.25	-0.16	-0.15	0.28	0.08	-0.187	0.0551	1.01e-12	5.09e-11	5.39e-74	3.03e-70	-0.467	0.000943	0.153
ONC0001476	L-741742	Preclinical	dopamine receptor antagonist	DRD3|DRD4|SCN1A|SCN3A			1.32	0.81	0.97	0.69	0.59	0.42	1033	0.261	0.567	0.137	0.588	0.885	2.79e-11	4.3e-10	-0.467	0.0353	0.445
ONC0001558	ZK-93426	Phase 1	benzodiazepine receptor antagonist	GABRA1|GABRA2|GABRA3|GABRA5			1.14	1.58	1.03	0.98	0.56	0.81	1.25	0.291	0.783	0.211	0.99	1	0.000648	0.00581	-0.467	0.0472	0.498
ONC0003115	decitabine	Launched	DNA methyltransferase inhibitor	DNMT1|DNMT3A	hematologic malignancy|hematology	myelodysplastic diseases (MDS)|anemia|chronic myeloid leukemia (CML)	0.92	1.02	1.07	0.55	0.55	0.51	1003	0.0764	0.537	0.0231	0.473	0.837	1.14e-12	1.86e-11	-0.467	0.00266	0.191
ONC0001908	VU0360172	Preclinical	glutamate receptor positive allosteric modulator	GRM5			0.99	1.02	0.79	0.48	0.56	0.36	0.933	0.125	0.467	0.101	0.229	0.688	2.86e-16	5.44e-15	-0.467	0.00411	0.23
ONC0000913	WIKI4	Preclinical	tankyrase inhibitor|WNT pathway inhibitor	TNKS2			0.99	1.28	1.22	0.72	0.77	0.6	1163	0.153	0.697	0.0874	0.93	1	2.66e-06	3.04e-05	-0.467	0.00858	0.293
ONC0004119	5-Fluoro-2'-deoxycytidine	NA	NA	NA	NA	NA	0.92	1.02	0.99	0.57	0.54	0.43	0.977	0.0513	0.513	0.0737	0.373	0.785	8.14e-14	1.39e-12	-0.463	0.000721	0.151
ONC0004878	Pralatrexate(Folotyn)	NA	NA	NA	NA	NA	0.97	1.16	1.11	0.6	0.68	0.57	1.08	0.0985	0.617	0.0569	0.749	0.947	3.64e-09	5.06e-08	-0.463	0.00236	0.184
ONC0004888	Pelitinib (EKB-569)	NA	NA	NA	NA	NA	0.97	0.85	1.24	0.5	0.61	0.56	1.02	0.2	0.557	0.0551	0.537	0.863	9.82e-12	1.56e-10	-0.463	0.0241	0.391
ONC0000789	CNX-2006	Preclinical	EGFR inhibitor	EGFR			0.88	0.47	0.71	0.11	0.31	0.25	0.687	0.206	0.223	0.103	0.000915	0.0145	1.16e-32	4.09e-31	-0.463	0.0206	0.37
ONC0000948	U-104	Phase 1/Phase 2	carbonic anhydrase inhibitor	CA1|CA12|CA2|CA9			0.96	1.53	1.36	0.75	0.61	1.1	1283	0.293	0.82	0.252	0.996	1	0.004	0.0316	-0.463	0.054	0.529
ONC0001716	GR-127935	Preclinical	serotonin receptor antagonist	HTR1A|HTR1B|HTR1D|HTR1E|HTR1F|HTR2A|HTR2B|HTR2C|HTR6			0.72	1.08	1	0.58	0.52	0.31	0.933	0.189	0.47	0.142	0.229	0.688	4.36e-16	8.23e-15	-0.463	0.0154	0.342
ONC0004937	Telatinib (BAY 57-9352)	NA	NA	NA	NA	NA	1	1.43	0.95	0.77	0.69	0.54	1127	0.264	0.667	0.117	0.869	0.988	2.66e-07	3.31e-06	-0.46	0.0386	0.467
ONC0001138	Enasidenib	Launched	isocitrate dehydrogenase inhibitor	IDH1	hematologic malignancy	acute myeloid leukemia (AML)	0.86	1.02	1.03	0.63	0.38	0.52	0.97	0.0954	0.51	0.125	0.349	0.774	5.53e-14	9.5e-13	-0.46	0.0043	0.235
ONC0003127	PFI-4	Preclinical	bromodomain inhibitor	BRPF1			0.98	0.99	1	0.54	0.48	0.57	0.99	0.01	0.53	0.0458	0.423	0.811	5.42e-13	8.92e-12	-0.46	0.00114	0.153
ONC0000201	SB-743921	Phase 1/Phase 2	kinesin-like spindle protein inhibitor	KIF11			0.55	0.5	0.53	0.1	-0.04	0.15	0.527	0.0252	0.07	0.0985	1.6e-06	4.08e-05	4.22e-46	3.83e-44	-0.457	0.00562	0.26
ONC0000884	NVP 231	NA	NA	NA	NA	NA	0.81	1.28	1.2	0.62	0.72	0.58	1097	0.251	0.64	0.0721	0.797	0.966	2.9e-08	3.84e-07	-0.457	0.0391	0.47
ONC0002541	tracazolate	Phase 2	GABA receptor modulator	GABRA1			1.13	0.92	1.38	0.81	0.66	0.6	1143	0.23	0.69	0.108	0.9	0.998	1.62e-06	1.89e-05	-0.453	0.0289	0.412
ONC0005233	CTEP (RO4956371)	NA	NA	NA	NA	NA	0.95	0.66	1.24	0.41	0.57	0.52	0.95	0.29	0.5	0.0819	0.281	0.736	1.71e-14	3e-13	-0.45	0.0529	0.523
ONC0005100	Baricitinib (LY3009104)	NA	NA	NA	NA	NA	2.11	1.23	1.41	1.17	1.07	1.16	1583	0.465	1133	0.0551	1	1	0.985	1	-0.45	0.117	0.63
ONC0004328	EPZ004777	Preclinical	histone lysine methyltransferase inhibitor	DOT1L			1.51	1.33	1.08	0.92	0.74	0.92	1307	0.216	0.86	0.104	0.998	1	0.0209	0.132	-0.447	0.0256	0.397
ONC0005023	XL888	Phase 1	HSP inhibitor				0.4	0.8	0.49	0.23	0.02	0.1	0.563	0.21	0.117	0.106	8.38e-06	0.000202	9.35e-42	5.92e-40	-0.447	0.0235	0.389
ONC0004955	Rutaecarpine (Rutecarpine)	NA	NA	NA	NA	NA	0.96	1.51	0.96	0.63	0.75	0.71	1143	0.318	0.697	0.0611	0.9	0.998	2.66e-06	3.04e-05	-0.447	0.0652	0.56
ONC0004578	LY2228820	Phase 2	p38 MAPK inhibitor	MAPK14			0.97	1.04	1.13	0.59	0.56	0.65	1047	0.0802	0.6	0.0458	0.637	0.909	7.65e-10	1.12e-08	-0.447	0.00143	0.154
ONC0002720	diphenyleneiodonium	Preclinical	nitric oxide synthase inhibitor	NOS2|NOS3			0.37	0.38	0.52	0.1	-0.1	-0.07	0.423	0.0839	-0.023	0.108	7.91e-09	2.53e-07	1.84e-55	6.09e-53	-0.447	0.00286	0.198
ONC0002990	bleomycetin	Launched	EGFR expression inhibitor				1	0.54	0.91	0.25	0.45	0.41	0.817	0.244	0.37	0.106	0.0311	0.239	4.66e-22	1.12e-20	-0.447	0.0348	0.441
ONC0003138	PD-158780	Preclinical	EGFR inhibitor	EGFR			1.07	0.95	1.04	0.52	0.62	0.59	1.02	0.0624	0.577	0.0513	0.537	0.863	7.74e-11	1.17e-09	-0.443	0.000409	0.136
ONC0001228	Arglabin	Launched	farnesyltransferase inhibitor	FNTA|NFKB1			1.21	1.2	1.57	0.94	0.87	0.84	1327	0.211	0.883	0.0513	0.999	1	0.0468	0.252	-0.443	0.0303	0.418
ONC0004726	SRT1720 HCl	NA	NA	NA	NA	NA	0.99	1.3	1.33	0.69	0.85	0.76	1207	0.188	0.767	0.0802	0.971	1	0.000257	0.00241	-0.44	0.0201	0.37
ONC0003122	THIOTEPA	Launched	cytochrome P450 inhibitor	CYP2B6|CYP3A4	oncology	breast cancer|ovarian cancer|bladder cancer	1.63	1	1.12	0.5	0.93	1	1.25	0.335	0.81	0.271	0.99	1	0.00251	0.0205	-0.44	0.0772	0.582
ONC0004600	Nintedanib (BIBF 1120)	NA	NA	NA	NA	NA	1.08	1.34	1.33	0.88	0.76	0.8	1.25	0.147	0.813	0.0611	0.99	1	0.00294	0.0238	-0.437	0.0115	0.315
ONC0001920	TP-003	Preclinical	GABA receptor inverse agonist	GABRA1|GABRA2|GABRA3|GABRA5			0.78	0.97	1.05	0.45	0.59	0.45	0.933	0.139	0.497	0.0808	0.229	0.688	1.15e-14	2.05e-13	-0.437	0.00772	0.286
ONC0002954	dimethisoquin	Launched	local anesthetic		neurology/psychiatry	local anesthetic	1.19	1.49	1.29	1.03	0.84	0.79	1323	0.153	0.887	0.127	0.999	1	0.0521	0.274	-0.437	0.0101	0.296
ONC0003535	CD-1530	Preclinical	retinoid receptor agonist	RARG			1.72	0.66	1.53	0.73	0.98	0.9	1303	0.565	0.87	0.128	0.998	1	0.0299	0.177	-0.433	0.157	0.669
ONC0000026	SB-202190	Preclinical	p38 MAPK inhibitor	AKT1|ALOX5|CHEK1|GSK3B|LCK|MAPK1|MAPK11|MAPK12|MAPK14|MAPK8|PRKCA|ROCK1|RPS6KB1|SGK1			0.86	0.94	1.02	0.58	0.47	0.47	0.94	0.08	0.507	0.0635	0.249	0.706	3.75e-14	6.51e-13	-0.433	0.00111	0.153
ONC0000924	UNC 0631	NA	NA	NA	NA	NA	1.2	1.4	1.58	1.11	0.8	0.97	1393	0.19	0.96	0.155	1	1	0.31	0.826	-0.433	0.0199	0.37
ONC0004577	CI-1033 (Canertinib)	NA	NA	NA	NA	NA	0.56	0.62	0.7	0.14	0.18	0.27	0.627	0.0702	0.197	0.0666	0.00011	0.00223	7.95e-35	3.2e-33	-0.43	0.000776	0.151
ONC0000166	GSK-3-inhibitor-IX	Preclinical	glycogen synthase kinase inhibitor|lipoxygenase inhibitor	GSK3A|GSK3B			1	1.13	1.01	0.72	0.69	0.44	1047	0.0723	0.617	0.154	0.637	0.909	3.64e-09	5.06e-08	-0.43	0.0123	0.318
ONC0001741	DMH4	Preclinical	VEGFR inhibitor	KDR			1.15	0.84	1.16	0.69	0.61	0.57	1.05	0.182	0.623	0.0611	0.649	0.915	6.67e-09	9.12e-08	-0.427	0.022	0.377
ONC0003595	YM-298198-desmethyl	Preclinical	glutamate receptor antagonist	GRM1			1.03	1.22	1.03	0.69	0.67	0.65	1093	0.11	0.67	0.02	0.788	0.963	3.47e-07	4.26e-06	-0.423	0.00947	0.295
ONC0004874	Ivabradine HCl (Procoralan)	NA	NA	NA	NA	NA	1.23	1.51	1.36	0.9	0.99	0.94	1367	0.14	0.943	0.0451	1	1	0.226	0.711	-0.423	0.0128	0.318
ONC0003553	BIBX-1382	Phase 1	EGFR inhibitor	EGFR|ERBB2			0.66	1.07	1.19	0.58	0.54	0.54	0.973	0.278	0.553	0.0231	0.361	0.778	6.9e-12	1.11e-10	-0.42	0.0596	0.543
ONC0002032	Azeliragon	Phase 3	RAGE receptor antagonist	AGER			1.12	0.99	1.44	0.77	0.79	0.73	1183	0.232	0.763	0.0306	0.952	1	0.000212	0.00202	-0.42	0.0428	0.487
ONC0004869	PHA-793887	Phase 1	CDK inhibitor	CDK1|CDK2|CDK4|CDK5|CDK7|CDK9			0.6	0.67	0.88	0.22	0.36	0.32	0.717	0.146	0.3	0.0721	0.00235	0.0329	7.61e-27	2.08e-25	-0.417	0.0112	0.311
ONC0002569	SD-208	Preclinical	TGF beta receptor inhibitor	TGFBR1			1.08	1	1	0.54	0.64	0.65	1027	0.0462	0.61	0.0608	0.563	0.874	1.97e-09	2.8e-08	-0.417	0.000486	0.151
ONC0001352	T-0901317	Preclinical	LXR agonist	NCOA1|NCOA2|NR1H2|NR1H3|NR1I2|RXRB			1.07	1.14	1.14	0.28	0.99	0.83	1117	0.0404	0.7	0.372	0.847	0.98	3.39e-06	3.85e-05	-0.417	0.0955	0.61
ONC0001541	SANT-2	Preclinical	smoothened receptor antagonist	SHH|SMO			0.83	0.9	1.02	0.33	0.6	0.57	0.917	0.0961	0.5	0.148	0.184	0.621	1.71e-14	3e-13	-0.417	0.0102	0.296
ONC0005359	N-METHYL (-)EPHEDRINE [1R,2S]	NA	NA	NA	NA	NA	1.46	1.39	1.54	1	1.13	1.01	1463	0.0751	1047	0.0723	1	1	0.799	1	-0.417	0.00115	0.153
ONC0004728	MLN8054	Phase 1	Aurora kinase inhibitor	AURKA			1.09	0.95	1.24	0.75	0.5	0.79	1093	0.145	0.68	0.157	0.788	0.963	7.59e-07	9.02e-06	-0.413	0.0145	0.332
ONC0003764	TCS-359	Preclinical	FLT3 inhibitor	FLT3			0.42	0.94	0.85	0.34	0.27	0.36	0.737	0.278	0.323	0.0473	0.00421	0.0528	3.41e-25	8.81e-24	-0.413	0.0598	0.543
ONC0001440	PI-103	Preclinical	mTOR inhibitor|PI3K inhibitor	MTOR|PIK3CA|PIK3CB|PIK3CD|PIK3CG|PRKDC			0.77	0.75	0.42	0.4	0.07	0.23	0.647	0.197	0.233	0.165	0.000231	0.0044	7.2e-32	2.39e-30	-0.413	0.0255	0.397
ONC0000695	MEFENAMIC ACID	NA	NA	NA	NA	NA	1.42	1.22	1.51	0.77	1.12	1.03	1383	0.148	0.973	0.182	1	1	0.386	0.893	-0.41	0.0205	0.37
ONC0002233	NMS-P715	Preclinical	protein kinase inhibitor				1.02	1.12	0.75	0.5	0.56	0.6	0.963	0.191	0.553	0.0503	0.326	0.763	6.9e-12	1.11e-10	-0.41	0.0287	0.412
ONC0002621	AZ3146	Preclinical	monopolar spindle 1 kinase inhibitor				1.06	1.12	0.88	0.58	0.56	0.69	1.02	0.125	0.61	0.07	0.537	0.863	1.97e-09	2.8e-08	-0.41	0.00704	0.281
ONC0001327	Mps1-IN-1	Preclinical	monopolar spindle 1 kinase inhibitor	TTK			1.36	1.09	1.24	0.75	0.83	0.88	1.23	0.135	0.82	0.0656	0.983	1	0.004	0.0316	-0.41	0.00976	0.296
ONC0000300	pyrintegrin	Preclinical	integrin signaling activator				0.98	0.93	0.49	0.38	0.37	0.42	0.8	0.27	0.39	0.0265	0.0214	0.186	8.79e-21	2.06e-19	-0.41	0.0588	0.541
ONC0000874	Cobimetinib	Launched	MEK inhibitor	MAP2K1	oncology	melanoma	0.7	0.95	0.87	0.36	0.58	0.35	0.84	0.128	0.43	0.13	0.0505	0.324	2.36e-18	4.94e-17	-0.41	0.0088	0.293
ONC0001926	Adarotene	Phase 1	retinoid receptor agonist	RARB|RARG			0.22	0.31	0.47	-0.21	-0.07	0.05	0.333	0.127	-0.077	0.13	3.53e-11	1.45e-09	3.27e-61	1.84e-58	-0.41	0.0087	0.293
ONC0005278	StemRegenin 1	NA	NA	NA	NA	NA	1.07	0.82	1.15	0.61	0.58	0.63	1013	0.172	0.607	0.0252	0.512	0.856	1.44e-09	2.09e-08	-0.407	0.0261	0.399
ONC0005075	Dacomitinib (PF299804, PF-00299804)	NA	NA	NA	NA	NA	0.67	0.43	0.56	0.18	0.17	0.09	0.553	0.12	0.147	0.0493	5.4e-06	0.000132	4.43e-39	2.42e-37	-0.407	0.00837	0.293
ONC0005101	MRS 2578	NA	NA	NA	NA	NA	1.07	1.59	1.79	1.17	1.07	0.99	1483	0.372	1077	0.0902	1	1	0.904	1	-0.407	0.0967	0.611
ONC0004950	Saracatinib (AZD0530)	NA	NA	NA	NA	NA	1.67	1.23	1.47	1.04	1.02	1.09	1457	0.22	1.05	0.0361	1	1	0.814	1	-0.407	0.0409	0.476
ONC0003054	PSNCBAM-1	Preclinical	cannabinoid receptor modulator	CNR1			1.04	0.99	1.03	0.44	0.71	0.69	1.02	0.0265	0.613	0.15	0.537	0.863	2.68e-09	3.77e-08	-0.407	0.0196	0.37
ONC0003795	piperacetazine	Launched	dopamine receptor antagonist		neurology/psychiatry	schizophrenia	1	1.01	1.66	0.88	0.82	0.76	1223	0.378	0.82	0.06	0.98	1	0.004	0.0316	-0.403	0.102	0.614
ONC0000019	PCI-29732	Preclinical	Bruton's tyrosine kinase (BTK) inhibitor	BTK			1.37	1.35	1.26	1.02	0.75	1	1327	0.0586	0.923	0.15	0.999	1	0.145	0.552	-0.403	0.0152	0.342
ONC0001826	Ulixertinib	NA	NA	NA	NA	NA	0.85	0.99	1.48	0.77	0.61	0.74	1107	0.331	0.707	0.085	0.823	0.974	5.46e-06	6.12e-05	-0.4	0.0823	0.586
ONC0004480	P276-00	Phase 2	CDK inhibitor	CDK1|CDK4|CDK9			1.19	1.3	1.3	0.89	0.89	0.82	1263	0.0635	0.867	0.0404	0.993	1	0.0266	0.161	-0.397	0.000837	0.152
ONC0005114	Etravirine (TMC125)	NA	NA	NA	NA	NA	1.01	1.01	0.96	0.52	0.75	0.52	0.993	0.0289	0.597	0.133	0.435	0.817	5.56e-10	8.2e-09	-0.397	0.0153	0.342
ONC0003916	VILAZODONE HYDROCHLORIDE	NA	NA	NA	NA	NA	0.98	0.98	1.23	0.5	0.76	0.74	1063	0.144	0.667	0.145	0.695	0.93	2.66e-07	3.31e-06	-0.397	0.0141	0.327
ONC0001372	SB-218078	Preclinical	CHK inhibitor	CHEK1			0.77	0.87	0.92	0.23	0.58	0.56	0.853	0.0764	0.457	0.197	0.0654	0.374	7.98e-17	1.55e-15	-0.397	0.029	0.412
ONC0001772	KS-176	Preclinical	BCRP inhibitor	ABCG2			0.69	1.02	0.73	0.46	0.34	0.45	0.813	0.18	0.417	0.0666	0.0289	0.227	3.81e-19	8.13e-18	-0.397	0.0244	0.391
ONC0001834	Frentizole	Phase 1	immunosuppressant				0.83	0.79	1.01	0.52	0.51	0.41	0.877	0.117	0.48	0.0608	0.0991	0.464	1.51e-15	2.82e-14	-0.397	0.00687	0.28
ONC0004348	BAM7	Preclinical	BAX activator	BAX			1.22	1.15	1.02	0.63	0.92	0.66	1.13	0.101	0.737	0.159	0.876	0.99	4.15e-05	0.00043	-0.393	0.015	0.34
ONC0003560	CGS-20625	Phase 1	benzodiazepine receptor agonist|GABA benzodiazepine site receptor partial agonist	GABRA1|GABRA2|GABRA3|GABRA4|GABRA5|GABRA6			1.49	1.25	1.42	1.03	1.05	0.9	1387	0.123	0.993	0.0814	1	1	0.507	0.957	-0.393	0.00697	0.28
ONC0001966	indoramin	Launched	adrenergic receptor antagonist	ADRA1A|ADRA1B|ADRA1D|ADRA2B|ADRA2C	urology|cardiology	benign prostatic hyperplasia (BPH)|hypertension	1.56	1	0.97	0.74	0.68	0.93	1177	0.332	0.783	0.131	0.946	1	0.000648	0.00581	-0.393	0.0831	0.587
ONC0003607	ZM-447439	Preclinical	Aurora kinase inhibitor	AURKA|AURKB			0.72	1.01	0.64	0.48	0.4	0.32	0.79	0.195	0.4	0.08	0.017	0.155	3.68e-20	8.37e-19	-0.39	0.029	0.412
ONC0000412	SR-1078	Preclinical	retinoid receptor agonist	RORA|RORC			1.07	0.82	0.77	0.48	0.55	0.46	0.887	0.161	0.497	0.0473	0.117	0.507	1.15e-14	2.05e-13	-0.39	0.0215	0.374
ONC0001658	etazolate	Phase 2	phosphodiesterase inhibitor	GABRB3|PDE4A			0.96	1.27	1.07	0.81	0.89	0.43	1.1	0.157	0.71	0.246	0.806	0.968	6.91e-06	7.73e-05	-0.39	0.0466	0.497
ONC0003166	ETHENZAMIDE	Launched	analgesic agent		neurology/psychiatry|endocrinology|otolaryngology	headache|fever|common cold	1.68	1.29	1.11	1.05	0.99	0.87	1.36	0.291	0.97	0.0917	1	1	0.366	0.877	-0.39	0.0682	0.565
ONC0001160	OAC2	Preclinical	Oct activator	POU5F1			1.51	0.94	1.93	1.12	1.1	0.99	1.46	0.497	1.07	0.07	1	1	0.885	1	-0.39	0.153	0.664
ONC0004379	KB-SRC-4	Preclinical	SRC inhibitor	SRC			0.9	1.23	0.86	0.61	0.66	0.56	0.997	0.203	0.61	0.05	0.448	0.825	1.97e-09	2.8e-08	-0.387	0.0367	0.455
ONC0004927	Imatinib Mesylate (STI571)	NA	NA	NA	NA	NA	1.16	1.23	0.98	0.74	0.73	0.74	1123	0.129	0.737	0.00577	0.862	0.986	4.15e-05	0.00043	-0.387	0.0175	0.353
ONC0004941	Neratinib (HKI-272)	NA	NA	NA	NA	NA	1.16	0.98	0.98	0.77	0.64	0.55	1.04	0.104	0.653	0.111	0.613	0.897	8.97e-08	1.15e-06	-0.387	0.00584	0.26
ONC0004479	NVP-BGT226	NA	NA	NA	NA	NA	0.67	0.37	0.54	0.21	0.18	0.03	0.527	0.15	0.14	0.0964	1.6e-06	4.08e-05	1.15e-39	6.4e-38	-0.387	0.0133	0.321
ONC0000779	Cot inhibitor-1	NA	NA	NA	NA	NA	1.58	0.92	1.31	1.01	0.81	0.83	1.27	0.332	0.883	0.11	0.994	1	0.0468	0.252	-0.387	0.0861	0.595
ONC0000106	BTT-3033	Preclinical	integrin inhibitor	ITGA2|ITGB1			1.07	1.15	1.11	0.74	0.76	0.67	1.11	0.04	0.723	0.0473	0.832	0.975	1.73e-05	0.000185	-0.387	0.000239	0.119
ONC0005619	deferoxamine-mesylate	Launched	chelating agent		hematology	acute iron intoxication|iron overload	0.95	0.93	1.13	0.6	0.46	0.79	1003	0.11	0.617	0.166	0.473	0.837	3.64e-09	5.06e-08	-0.387	0.0174	0.353
ONC0001220	Triflusal	Launched	cyclooxygenase inhibitor|platelet aggregation inhibitor|thromboxane synthase inhibitor	NFKB1|NOS2|PDE10A|PTGS1	neurology/psychiatry|cardiology	stroke|myocardial infarction|atrial fibrillation (AF)	1.15	1.11	1.41	0.85	0.78	0.88	1223	0.163	0.837	0.0513	0.98	1	0.0083	0.0596	-0.387	0.022	0.377
ONC0004486	SLV-319-(+/-)	Phase 2	cannabinoid receptor antagonist	CNR1|DRD2|HTR1A			1.65	1.59	0.9	1.05	0.98	0.96	1.38	0.417	0.997	0.0473	1	1	0.528	0.968	-0.383	0.126	0.632
ONC0004985	CH5424802	NA	NA	NA	NA	NA	1.5	1.07	1	0.87	0.8	0.75	1.19	0.271	0.807	0.0603	0.958	1	0.00214	0.0177	-0.383	0.0638	0.558
ONC0005138	CNX-774	Preclinical	Bruton's tyrosine kinase (BTK) inhibitor	BTK			1.2	1.27	0.94	0.67	0.8	0.79	1137	0.174	0.753	0.0723	0.888	0.995	0.000117	0.00115	-0.383	0.0232	0.387
ONC0001325	Olmutinib	Launched	Bruton's tyrosine kinase (BTK) inhibitor|EGFR inhibitor	BTK|EGFR	oncology	non-small cell lung cancer (NSCLC)	0.52	0.77	0.62	0.12	0.34	0.3	0.637	0.126	0.253	0.117	0.00016	0.00311	2.59e-30	8.04e-29	-0.383	0.00915	0.295
ONC0005590	lometrexol	Phase 2	glycinamide ribonucleotide formyltransferase inhibitor	GART			0.95	0.9	1.05	0.62	0.6	0.53	0.967	0.0764	0.583	0.0473	0.337	0.769	1.51e-10	2.26e-09	-0.383	0.00177	0.165
ONC0004359	SGX-523	Phase 1	hepatocyte growth factor receptor inhibitor	MET			1.21	1	1.58	0.95	0.74	0.96	1263	0.294	0.883	0.124	0.993	1	0.0468	0.252	-0.38	0.0706	0.567
ONC0002448	SPIRAMYCIN	Launched	bacterial 50S ribosomal subunit inhibitor		infectious disease	toxoplasmosis|soft tissue infection	1.73	1.12	1.44	1.06	1.08	1.01	1.43	0.305	1.05	0.0361	1	1	0.814	1	-0.38	0.081	0.584
ONC0000800	MRS-1220	Preclinical	adenosine receptor antagonist	ADORA2B|ADORA3			1.22	0.99	0.76	0.66	0.53	0.64	0.99	0.23	0.61	0.07	0.423	0.811	1.97e-09	2.8e-08	-0.38	0.0464	0.497
ONC0003289	Fluphenazine decanoate	NA	NA	NA	NA	NA	1.47	1.05	1.58	0.97	0.98	1.02	1367	0.28	0.99	0.0265	1	1	0.487	0.945	-0.377	0.0719	0.572
ONC0000028	CCMI	Preclinical	acetylcholine receptor allosteric modulator	CHRNA7			1.13	1.24	1.08	0.74	0.75	0.83	1.15	0.0819	0.773	0.0493	0.911	1	0.000375	0.00346	-0.377	0.0024	0.185
ONC0002088	Basimglurant	Phase 2	glutamate receptor antagonist	GRM5			0.88	0.69	1.03	0.49	0.47	0.51	0.867	0.17	0.49	0.02	0.0834	0.429	5.14e-15	9.37e-14	-0.377	0.03	0.417
ONC0001977	haloperidol-decanoate	Launched	psychoactive drug	DRD2|DRD3|DRD4|HTR2A	neurology/psychiatry	schizophrenia	1.33	0.91	1.49	0.92	0.71	0.97	1243	0.3	0.867	0.138	0.988	1	0.0266	0.161	-0.377	0.0742	0.58
ONC0004788	nalmefene hydrochloride	NA	NA	NA	NA	NA	1.26	1.59	1.27	1.05	1	0.95	1373	0.188	1	0.05	1	1	0.548	0.978	-0.373	0.0332	0.429
ONC0004195	Echinomycin	Phase 2	DNA intercalating agent				0.43	0.28	0.34	0	-0.04	-0.03	0.35	0.0755	-0.023	0.0208	1.02e-10	3.92e-09	1.84e-55	6.09e-53	-0.373	0.00465	0.24
ONC0004628	Ponatinib (AP24534)	NA	NA	NA	NA	NA	1.03	1.16	1.13	0.66	0.72	0.82	1107	0.0681	0.733	0.0808	0.823	0.974	3.34e-05	0.00035	-0.373	0.00198	0.172
ONC0004407	SB-408124	Preclinical	orexin receptor antagonist	HCRTR1|HCRTR2			1.09	1.33	0.95	0.64	0.84	0.77	1123	0.192	0.75	0.101	0.862	0.986	9.56e-05	0.000951	-0.373	0.029	0.412
ONC0004647	17-AAG (Tanespimycin)	NA	NA	NA	NA	NA	0.33	0.42	0.48	-0.06	0.06	0.11	0.41	0.0755	0.037	0.0874	3.72e-09	1.26e-07	2.43e-49	2.91e-47	-0.373	0.00265	0.191
ONC0003455	AM-630, Iodopravadoline	NA	NA	NA	NA	NA	0.99	1.27	1.12	0.68	0.74	0.84	1127	0.14	0.753	0.0808	0.869	0.988	0.000117	0.00115	-0.373	0.0124	0.318
ONC0001477	AMD-3465	Preclinical	CC chemokine receptor antagonist	CXCR4			1.64	1.33	1.22	0.97	0.98	1.12	1397	0.218	1023	0.0839	1	1	0.684	1	-0.373	0.0412	0.476
ONC0005448	AV-412 (free base)	NA	NA	NA	NA	NA	0.84	1.04	1.12	0.6	0.57	0.71	1	0.144	0.627	0.0737	0.461	0.831	8.99e-09	1.22e-07	-0.373	0.0143	0.329
ONC0004396	Pexmetinib (ARRY-614)	NA	NA	NA	NA	NA	0.97	1.12	1.02	0.69	0.66	0.65	1037	0.0764	0.667	0.0208	0.6	0.889	2.66e-07	3.31e-06	-0.37	0.0049	0.245
ONC0005089	Omecamtiv mecarbil (CK-1827452)	NA	NA	NA	NA	NA	0.93	1.68	1.75	1.09	1.12	1.04	1453	0.455	1083	0.0404	1	1	0.92	1	-0.37	0.147	0.653
ONC0003626	CW-008	Preclinical	PKA activator	PRKACA			0.9	0.99	0.8	0.57	0.55	0.46	0.897	0.095	0.527	0.0586	0.137	0.55	3.73e-13	6.19e-12	-0.37	0.00393	0.23
ONC0002393	CHLOROGUANIDE HYDROCHLORIDE	NA	NA	NA	NA	NA	1.58	1.25	0.98	0.86	0.85	0.99	1.27	0.3	0.9	0.0781	0.994	1	0.0779	0.368	-0.37	0.0799	0.583
ONC0001076	Osimertinib	Launched	EGFR inhibitor	EGFR	oncology	non-small cell lung cancer (NSCLC)	0.53	0.39	0.49	0.09	0.07	0.14	0.47	0.0721	0.1	0.0361	9.8e-08	2.75e-06	2.78e-43	1.98e-41	-0.37	0.00223	0.181
ONC0002040	Gilteritinib	Launched	FLT3 inhibitor	FLT3			0.92	1.15	1.19	0.72	0.66	0.77	1087	0.146	0.717	0.0551	0.769	0.954	1.1e-05	0.00012	-0.37	0.0175	0.353
ONC0004732	Curcumol	Phase 1	JAK inhibitor	JAK1|JAK2|JAK3			1.35	0.93	1.73	0.96	0.98	0.97	1337	0.4	0.97	0.01	0.999	1	0.366	0.877	-0.367	0.127	0.632
ONC0003746	VLX-600	Phase 1	antitumor agent|ubiquitin C-terminal hydrolase inhibitor	TP53|USP14			0.25	0.14	0.21	-0.14	-0.23	-0.13	0.2	0.0557	-0.167	0.0551	3.01e-15	2.1e-13	1.41e-71	2.64e-68	-0.367	0.000629	0.151
ONC0004363	EPZ005687	Preclinical	histone lysine methyltransferase inhibitor	EZH2			1.08	1.16	0.81	0.66	0.71	0.58	1017	0.183	0.65	0.0656	0.525	0.861	6.79e-08	8.83e-07	-0.367	0.0304	0.418
ONC0004424	Entrectinib (RXDX-101)	NA	NA	NA	NA	NA	1.31	1.11	1.31	0.87	1.06	0.7	1243	0.115	0.877	0.18	0.988	1	0.0376	0.214	-0.367	0.0252	0.397
ONC0005145	Entospletinib (GS-9973)	NA	NA	NA	NA	NA	0.99	1.01	0.97	0.68	0.61	0.58	0.99	0.02	0.623	0.0513	0.423	0.811	6.67e-09	9.12e-08	-0.367	0.00134	0.154
ONC0003694	Leu-Leu-OMeHCl	NA	NA	NA	NA	NA	1.36	1.39	1.52	1.13	0.99	1.05	1423	0.085	1057	0.0702	1	1	0.84	1	-0.367	0.00251	0.186
ONC0004293	c-Kit-IN-1	NA	NA	NA	NA	NA	0.81	1.18	0.97	0.29	0.74	0.83	0.987	0.186	0.62	0.289	0.41	0.805	4.93e-09	6.84e-08	-0.367	0.0753	0.58
ONC0002725	nemonapride	Launched	dopamine receptor antagonist	DRD2|DRD3|DRD4	neurology/psychiatry	schizophrenia	1.21	1.09	0.95	0.78	0.71	0.66	1083	0.13	0.717	0.0603	0.759	0.95	1.1e-05	0.00012	-0.367	0.0122	0.318
ONC0001531	BCTC	Preclinical	TRPV antagonist	TRPV1			1.22	0.95	1.13	0.81	0.63	0.76	1.1	0.137	0.733	0.0929	0.806	0.968	3.34e-05	0.00035	-0.367	0.0118	0.317
ONC0003081	fulvestrant	Launched	estrogen receptor antagonist	ESR1|ESR2|GPER1	oncology	breast cancer	1.03	0.92	1.17	0.64	0.81	0.57	1.04	0.125	0.673	0.123	0.613	0.897	4.52e-07	5.48e-06	-0.367	0.0113	0.311
ONC0004689	thioguanosine	NA	NA	NA	NA	NA	0.87	0.97	0.75	0.66	0.29	0.55	0.863	0.11	0.5	0.19	0.0785	0.415	1.71e-14	3e-13	-0.363	0.0297	0.416
ONC0004505	mesoridazine besylate	NA	NA	NA	NA	NA	0.88	1.48	1.21	0.94	0.95	0.59	1.19	0.3	0.827	0.205	0.958	1	0.0054	0.0411	-0.363	0.0841	0.591
ONC0002251	PD153035 (Hydrochloride)	NA	NA	NA	NA	NA	1.01	0.98	0.95	0.7	0.58	0.57	0.98	0.03	0.617	0.0723	0.385	0.789	3.64e-09	5.06e-08	-0.363	0.00304	0.198
ONC0000809	BMS-536924	Preclinical	IGF-1 inhibitor	AKT1|CCNE1|CDK2|CYP3A4|ERBB2|IGF1R|KDR|LCK|MAPK1|MET|PDGFRA|PDGFRB			0.78	0.95	1.08	0.56	0.7	0.46	0.937	0.15	0.573	0.121	0.239	0.699	5.52e-11	8.45e-10	-0.363	0.0166	0.353
ONC0003311	Etoposide phosphate	NA	NA	NA	NA	NA	1.22	1.52	1.05	0.98	0.95	0.77	1263	0.238	0.9	0.114	0.993	1	0.0779	0.368	-0.363	0.0505	0.514
ONC0005099	PF-5274857	Preclinical	smoothened receptor antagonist	SMO			1.36	1.5	1.35	0.85	1.17	1.11	1403	0.0839	1043	0.17	1	1	0.785	1	-0.36	0.024	0.391
ONC0001441	pirinixic-acid	Preclinical	PPAR receptor agonist	PPARA			0.97	1.14	1.29	0.84	0.43	1.05	1133	0.16	0.773	0.315	0.882	0.993	0.000375	0.00346	-0.36	0.0885	0.599
ONC0001916	BML-284	Preclinical	WNT agonist				0.28	0.61	0.47	0.17	0.09	0.02	0.453	0.166	0.093	0.0751	4.08e-08	1.2e-06	6.7e-44	5.17e-42	-0.36	0.0232	0.387
ONC0002905	alcuronium	Launched	muscle relaxant	CHRM1|CHRM2|CHRM3|CHRM4|CHRNA7	neurology/psychiatry	muscle relaxant	0.93	1.68	1.44	0.8	1.06	1.11	1.35	0.383	0.99	0.166	0.999	1	0.487	0.945	-0.36	0.12	0.63
ONC0004762	ITF2357 (Givinostat)	NA	NA	NA	NA	NA	0.68	0.88	0.67	0.27	0.33	0.56	0.743	0.118	0.387	0.153	0.00508	0.0604	5.42e-21	1.28e-19	-0.357	0.0181	0.361
ONC0004370	OSI-930	Phase 1	KIT inhibitor|VEGFR inhibitor	FLT1|KDR|KIT			1.09	1.06	1.2	0.72	0.85	0.71	1117	0.0737	0.76	0.0781	0.847	0.98	0.000174	0.00168	-0.357	0.00229	0.181
ONC0005080	Crenolanib (CP-868596)	NA	NA	NA	NA	NA	1.2	0.88	1.42	0.9	0.75	0.78	1167	0.272	0.81	0.0794	0.934	1	0.00251	0.0205	-0.357	0.071	0.569
ONC0004999	Palomid 529	NA	NA	NA	NA	NA	1.33	0.99	1.07	0.87	0.74	0.71	1.13	0.178	0.773	0.085	0.876	0.99	0.000375	0.00346	-0.357	0.0275	0.407
ONC0004148	oxprenolol	Launched	adrenergic receptor antagonist	ADRB1	cardiology	angina pectoris|hypertension|cardiac arrythmia	1.17	1.06	1.3	0.82	0.91	0.74	1177	0.12	0.823	0.085	0.946	1	0.00465	0.0361	-0.353	0.00879	0.293
ONC0004784	Almotriptan malate (Axert)	NA	NA	NA	NA	NA	1.59	1.51	0.94	0.96	0.99	1.03	1347	0.354	0.993	0.0351	0.999	1	0.507	0.957	-0.353	0.113	0.623
ONC0004166	OXYBUTYNIN CHLORIDE	NA	NA	NA	NA	NA	1.03	1.22	1.27	0.7	0.93	0.83	1173	0.127	0.82	0.115	0.942	1	0.004	0.0316	-0.353	0.0118	0.317
ONC0005175	Poziotinib (HM781-36B)	NA	NA	NA	NA	NA	0.57	0.63	0.72	0.46	0.17	0.23	0.64	0.0755	0.287	0.153	0.000181	0.0035	8.19e-28	2.29e-26	-0.353	0.0194	0.37
ONC0002566	aurora-a-inhibitor-i	Preclinical	Aurora kinase inhibitor	AURKA			0.99	0.85	1.18	0.7	0.66	0.6	1007	0.166	0.653	0.0503	0.486	0.843	8.97e-08	1.15e-06	-0.353	0.0279	0.408
ONC0002428	ORBIFLOXACIN	Launched	bacterial DNA gyrase inhibitor		infectious disease	urinary tract infections	1.79	1.17	1.01	0.77	1.06	1.08	1323	0.412	0.97	0.173	0.999	1	0.366	0.877	-0.353	0.137	0.644
ONC0002288	Vesatolimod	NA	NA	NA	NA	NA	1.41	1.18	1.41	1.13	1.09	0.72	1333	0.133	0.98	0.226	0.999	1	0.426	0.919	-0.353	0.0477	0.502
ONC0001103	LY2874455	Phase 1	FGFR antagonist	FGFR1|FGFR2|FGFR3|FGFR4|KDR			0.85	0.58	0.92	0.42	0.5	0.37	0.783	0.18	0.43	0.0656	0.0144	0.139	2.36e-18	4.94e-17	-0.353	0.0313	0.42
ONC0001107	Nazartinib	NA	NA	NA	NA	NA	0.73	0.59	0.43	0.39	0.13	0.17	0.583	0.15	0.23	0.14	1.96e-05	0.000448	3.93e-32	1.33e-30	-0.353	0.0205	0.37
ONC0002437	ALBENDAZOLE	Launched	tubulin polymerization inhibitor	TUBA1A|TUBB|TUBB4B	infectious disease	cystic hydatid disease|parenchymal neurocysticercosis	0.78	0.68	0.96	0.48	0.45	0.44	0.807	0.142	0.457	0.0208	0.025	0.207	7.98e-17	1.55e-15	-0.35	0.024	0.391
ONC0005511	TROXERUTIN	Launched	antioxidant				1.29	1.06	1.64	1	1.01	0.93	1.33	0.292	0.98	0.0436	0.999	1	0.426	0.919	-0.35	0.0855	0.594
ONC0003089	CHROMOCARB	Launched	antispasmodic				1.52	1.22	1.28	0.88	0.98	1.11	1.34	0.159	0.99	0.115	0.999	1	0.487	0.945	-0.35	0.0207	0.37
ONC0001860	Apilimod	NA	NA	NA	NA	NA	0.68	0.39	0.2	-0.01	0.09	0.14	0.423	0.242	0.073	0.0764	7.91e-09	2.53e-07	8.77e-46	7.72e-44	-0.35	0.0592	0.541
ONC0005408	butofilolol	Phase 2	adrenergic receptor antagonist				1.62	1.11	1.02	0.94	0.76	1	1.25	0.324	0.9	0.125	0.99	1	0.0779	0.368	-0.35	0.0967	0.611
ONC0004939	Halofuginone	Launched	collagenase inhibitor	COL1A1|MMP2	rheumatology	scleroderma	0.28	0.3	0.64	0.06	0.08	0.04	0.407	0.202	0.06	0.02	3.07e-09	1.05e-07	4.63e-47	4.42e-45	-0.347	0.0479	0.503
ONC0003046	JHW-007	Preclinical	dopamine reuptake inhibitor	SLC6A3			1.3	1.27	1.27	0.79	1.05	0.96	1.28	0.0173	0.933	0.132	0.995	1	0.182	0.63	-0.347	0.0215	0.374
ONC0002712	tetrindole	Phase 3	monoamine oxidase inhibitor	MAOA			1.18	1.36	1.39	1.06	0.83	1	1.31	0.114	0.963	0.119	0.998	1	0.329	0.839	-0.347	0.011	0.309
ONC0000765	aminopurvalanol-a	Preclinical	CDK inhibitor|tyrosine kinase inhibitor	CDK1|CDK2|CDK5			0.82	0.88	1.07	0.54	0.62	0.57	0.923	0.131	0.577	0.0404	0.201	0.653	7.74e-11	1.17e-09	-0.347	0.0174	0.353
ONC0002461	TANNIC ACID	NA	NA	NA	NA	NA	1.24	1.25	1.15	0.88	0.75	0.97	1213	0.0551	0.867	0.111	0.975	1	0.0266	0.161	-0.347	0.00876	0.293
ONC0001611	BINA	Preclinical	glutamate receptor positive allosteric modulator	GRM2			0.9	1.05	1.11	0.7	0.75	0.57	1.02	0.108	0.673	0.0929	0.537	0.863	4.52e-07	5.48e-06	-0.347	0.00712	0.282
ONC0001422	rimcazole	Phase 1	sigma receptor antagonist	SIGMAR1			1.55	0.91	1.19	0.81	0.81	0.99	1217	0.321	0.87	0.104	0.977	1	0.0299	0.177	-0.347	0.0974	0.611
ONC0004779	L (+)-Rhamnose Monohydrate	NA	NA	NA	NA	NA	1	1.21	1.65	0.86	0.99	0.98	1287	0.332	0.943	0.0723	0.996	1	0.226	0.711	-0.343	0.105	0.616
ONC0005051	CHIR-124	Preclinical	CHK inhibitor	CHEK1			0.54	0.48	0.5	0.27	0.13	0.09	0.507	0.0306	0.163	0.0945	6.18e-07	1.62e-05	1.24e-37	6.06e-36	-0.343	0.00842	0.293
ONC0003647	INCB 3284	NA	NA	NA	NA	NA	1.25	1.16	1.37	0.82	0.78	1.15	1.26	0.105	0.917	0.203	0.992	1	0.122	0.499	-0.343	0.0402	0.472
ONC0003139	U-54494A	Preclinical	opioid receptor agonist	OPRK1			1.56	1	1.54	1.07	1.09	0.91	1367	0.318	1023	0.0987	1	1	0.684	1	-0.343	0.0975	0.611
ONC0003774	NS-8	Phase 2	potassium channel agonist	KCNMA1			1.57	1.27	1.22	0.98	1	1.06	1353	0.189	1013	0.0416	1	1	0.628	1	-0.34	0.0417	0.477
ONC0004856	WZ4002	Preclinical	EGFR inhibitor	EGFR|ERBB2			0.4	0.44	0.36	0.03	0.11	0.04	0.4	0.04	0.06	0.0436	2.09e-09	7.25e-08	4.63e-47	4.42e-45	-0.34	0.000297	0.129
ONC0003069	torin-2	Preclinical	mTOR inhibitor	MTOR			0.25	0.36	0.41	-0.16	0.03	0.13	0.34	0.0819	0	0.147	5.41e-11	2.15e-09	4.88e-53	9.82e-51	-0.34	0.0186	0.367
ONC0000807	VU0155069	Preclinical	phospholipase inhibitor	PLD1			0.95	0.99	0.92	0.58	0.6	0.66	0.953	0.0351	0.613	0.0416	0.292	0.741	2.68e-09	3.77e-08	-0.34	0.000241	0.119
ONC0003282	PROPOXUR	Launched			infectious disease	flea control	1.15	1.12	1.17	0.72	0.93	0.77	1147	0.0252	0.807	0.11	0.906	1	0.00214	0.0177	-0.34	0.014	0.327
ONC0000045	AZ-12080282	Preclinical	hedgehog pathway inhibitor	DHH			1.36	1.12	0.88	0.59	0.85	0.9	1.12	0.24	0.78	0.166	0.855	0.984	0.000541	0.00491	-0.34	0.0613	0.549
ONC0004499	A-803467	Preclinical	sodium channel blocker	SCN10A			0.91	0.75	1.32	0.67	0.69	0.61	0.993	0.294	0.657	0.0416	0.435	0.817	1.18e-07	1.5e-06	-0.337	0.0918	0.606
ONC0003557	TC-G-1008	Preclinical	G protein-coupled receptor agonist	GPR39			1	0.98	0.99	0.57	0.64	0.75	0.99	0.01	0.653	0.0907	0.423	0.811	8.97e-08	1.15e-06	-0.337	0.0111	0.311
ONC0004282	PND-1186	NA	NA	NA	NA	NA	0.75	0.86	0.6	0.22	0.42	0.56	0.737	0.131	0.4	0.171	0.00421	0.0528	3.68e-20	8.37e-19	-0.337	0.0287	0.412
ONC0002028	Defactinib	Phase 2	focal adhesion kinase inhibitor	PTK2			0.92	0.72	0.98	0.37	0.61	0.63	0.873	0.136	0.537	0.145	0.0936	0.451	1.14e-12	1.86e-11	-0.337	0.0214	0.374
ONC0001811	AMG-208	Phase 1	tyrosine kinase inhibitor	MET			0.87	1.24	1.05	0.6	0.59	0.96	1053	0.185	0.717	0.211	0.661	0.916	1.1e-05	0.00012	-0.337	0.0537	0.527
ONC0001957	Vinorelbine (ditartrate)	NA	NA	NA	NA	NA	0.39	0.41	0.46	0.12	0.04	0.09	0.42	0.0361	0.083	0.0404	6.56e-09	2.12e-07	7.76e-45	6.43e-43	-0.337	0.000226	0.119
ONC0004170	D-LACTITOL MONOHYDRATE	NA	NA	NA	NA	NA	1.25	1.7	1.19	1.02	1.03	1.09	1.38	0.279	1047	0.0379	1	1	0.799	1	-0.333	0.086	0.595
ONC0002818	OXETHAZAINE	Launched	local anesthetic		neurology/psychiatry	local anesthetic	1.35	1.28	1.46	0.9	1.17	1.02	1363	0.0907	1.03	0.135	1	1	0.72	1	-0.333	0.0149	0.34
ONC0005467	9-aminocamptothecin	Phase 2	topoisomerase inhibitor	TOP1			0.37	0.24	0.69	0.16	0.13	0.01	0.433	0.232	0.1	0.0794	1.38e-08	4.31e-07	2.78e-43	1.98e-41	-0.333	0.0592	0.541
ONC0005306	BUCETIN	Withdrawn	analgesic agent				1.2	1.22	1.51	0.93	1	1	1.31	0.173	0.977	0.0404	0.998	1	0.406	0.902	-0.333	0.0364	0.455
ONC0001715	VU-0364739	Preclinical	phospholipase inhibitor	PLD2			1.39	0.99	1.04	0.8	0.82	0.8	1.14	0.218	0.807	0.0115	0.894	0.998	0.00214	0.0177	-0.333	0.0587	0.541
ONC0005199	10-Hydroxycamptothecin	Preclinical	topoisomerase inhibitor	TOP1			0.43	0.47	0.64	0.17	0.18	0.2	0.513	0.112	0.183	0.0153	8.52e-07	2.21e-05	6.18e-36	2.62e-34	-0.33	0.017	0.353
ONC0004902	Cilomilast (SB-207499)	NA	NA	NA	NA	NA	0.96	1.38	1.42	1	0.92	0.85	1253	0.255	0.923	0.0751	0.99	1	0.145	0.552	-0.33	0.0727	0.575
ONC0002493	A-887826	Preclinical	sodium channel blocker	SCN10A			0.94	1	0.79	0.56	0.64	0.54	0.91	0.108	0.58	0.0529	0.167	0.597	1.08e-10	1.63e-09	-0.33	0.00953	0.295
ONC0004833	Dapivirine (TMC120)	NA	NA	NA	NA	NA	0.97	1.05	1.04	0.82	0.59	0.67	1.02	0.0436	0.693	0.117	0.537	0.863	2.08e-06	2.41e-05	-0.327	0.0141	0.327
ONC0005015	Tolvaptan (OPC-41061)	NA	NA	NA	NA	NA	1.58	0.85	1.08	0.7	0.84	0.99	1.17	0.373	0.843	0.145	0.938	1	0.0109	0.0753	-0.327	0.133	0.637
ONC0000247	2-PMDQ	Preclinical	adrenergic receptor antagonist	ADRA1A			1.22	1.24	1.42	0.99	0.93	0.98	1293	0.11	0.967	0.0321	0.997	1	0.347	0.857	-0.327	0.014	0.327
ONC0003171	GLAFENINE	Withdrawn	DeltaF508-CFTR Correctors	CFTR			1.05	1.16	0.89	0.7	0.7	0.72	1033	0.136	0.707	0.0115	0.588	0.885	5.46e-06	6.12e-05	-0.327	0.026	0.399
ONC0005295	PODOFILOX	NA	NA	NA	NA	NA	0.37	0.58	0.56	0.09	0.2	0.24	0.503	0.116	0.177	0.0777	5.25e-07	1.38e-05	1.7e-36	7.46e-35	-0.327	0.0101	0.296
ONC0001196	3PO	Preclinical	phosphofructokinase inhibitor	PFKFB3			1.51	1.04	1.55	0.99	0.99	1.14	1367	0.284	1.04	0.0866	1	1	0.769	1	-0.327	0.0882	0.597
ONC0005220	AZ 960	NA	NA	NA	NA	NA	0.64	0.75	0.88	0.35	0.47	0.48	0.757	0.12	0.433	0.0723	0.0073	0.0811	3.7e-18	7.6e-17	-0.323	0.0119	0.317
ONC0004110	ABAMECTIN (avermectin B1a shown)	NA	NA	NA	NA	NA	1.18	1.37	1.16	0.73	1	1.01	1237	0.116	0.913	0.159	0.985	1	0.112	0.472	-0.323	0.0258	0.397
ONC0004273	CLIMBAZOLE	Launched	enzyme inducer		dermatology	dandruff|eczema	1.33	0.98	1.46	0.96	0.88	0.96	1257	0.248	0.933	0.0462	0.991	1	0.182	0.63	-0.323	0.0743	0.58
ONC0002708	A-7	Preclinical	calmodulin antagonist				1.04	1.61	1.36	1.02	0.99	1.03	1337	0.286	1013	0.0208	0.999	1	0.628	1	-0.323	0.0942	0.606
ONC0000421	DESIPRAMINE HYDROCHLORIDE	NA	NA	NA	NA	NA	1.09	1.16	1.1	0.67	1.22	0.49	1117	0.0379	0.793	0.38	0.847	0.98	0.0011	0.0095	-0.323	0.139	0.649
ONC0004340	Azelnidipine	Launched	calcium channel blocker	CACNA1C	cardiology	hypertension	0.89	0.77	1.18	0.64	0.58	0.66	0.947	0.211	0.627	0.0416	0.27	0.728	8.99e-09	1.22e-07	-0.32	0.0571	0.538
ONC0005057	WAY-600	Preclinical	mTOR inhibitor	MTOR			1.19	0.98	1.07	0.74	0.81	0.73	1.08	0.105	0.76	0.0436	0.749	0.947	0.000174	0.00168	-0.32	0.0109	0.309
ONC0004437	Talazoparib (BMN 673)	NA	NA	NA	NA	NA	1.03	1	0.97	0.62	0.69	0.73	1	0.03	0.68	0.0557	0.461	0.831	7.59e-07	9.02e-06	-0.32	0.00143	0.154
ONC0000732	CY208-243	Phase 2	dopamine receptor agonist	CALY			1	1.17	1.28	0.65	0.78	1.06	1.15	0.141	0.83	0.21	0.911	1	0.00624	0.0466	-0.32	0.0514	0.517
ONC0003344	Vitamin B12	NA	NA	NA	NA	NA	1.61	1.55	0.96	1.09	1.07	1	1373	0.359	1053	0.0473	1	1	0.827	1	-0.32	0.131	0.633
ONC0002182	chlorindanol	Preclinical					1.12	1.37	1.2	0.8	1.02	0.92	1.23	0.128	0.913	0.11	0.983	1	0.112	0.472	-0.317	0.0161	0.349
ONC0000698	ATENOLOL
ONC0000757	Ixabepilone	Launched	microtubule stabilizing agent	TUBB	oncology	breast cancer	0.62	0.64	0.53	0.36	0.23	0.25	0.597	0.0586	0.28	0.07	3.4e-05	0.000737	2.64e-28	7.71e-27	-0.317	0.00213	0.176
ONC0000244	GNF-5	Preclinical	Bcr-Abl kinase inhibitor	ABL1|BCR			0.98	1.2	0.84	0.77	0.63	0.67	1007	0.181	0.69	0.0721	0.486	0.843	1.62e-06	1.89e-05	-0.317	0.0394	0.471
ONC0000390	bemesetron	Phase 3	serotonin receptor antagonist	HTR3A|HTR3B			0.92	1.15	1.27	0.9	0.79	0.7	1113	0.178	0.797	0.1	0.84	0.979	0.0013	0.0112	-0.317	0.0354	0.446
ONC0001436	indirubin-3-monoxime	Preclinical	CDK inhibitor|glycogen synthase kinase inhibitor	CDK1|CDK2|CDK5|CDK5R1|GSK3B			1.3	1.1	1.03	0.86	0.77	0.85	1143	0.14	0.827	0.0493	0.9	0.998	0.0054	0.0411	-0.317	0.0235	0.389
ONC0002094	Ceritinib	Launched	ALK tyrosine kinase receptor inhibitor	ALK|FLT3|IGF1R|INSR|TSSK1B	oncology	non-small cell lung cancer (NSCLC)	1.04	0.77	0.96	0.7	0.65	0.47	0.923	0.139	0.607	0.121	0.201	0.653	1.44e-09	2.09e-08	-0.317	0.0208	0.37
ONC0002013	Carbetocin	Launched	oxytocin receptor agonist	OXTR	hematology	hemorrhage	1.08	1.22	1.45	0.95	1.05	0.8	1.25	0.187	0.933	0.126	0.99	1	0.182	0.63	-0.317	0.0403	0.473
ONC0003542	cilnidipine	Launched	calcium channel blocker	CACNA1B	cardiology	hypertension	1.19	0.57	1.06	0.61	0.62	0.65	0.94	0.327	0.627	0.0208	0.249	0.706	8.99e-09	1.22e-07	-0.313	0.119	0.63
ONC0004636	Epirubicin Hydrochloride	NA	NA	NA	NA	NA	0.44	0.41	0.38	0.01	0.13	0.15	0.41	0.03	0.097	0.0757	3.72e-09	1.26e-07	1.37e-43	1.01e-41	-0.313	0.00524	0.252
ONC0000199	ANA-12	Preclinical	tropomyosin receptor kinase inhibitor	NTRK2			1.1	1.12	0.7	0.71	0.71	0.56	0.973	0.237	0.66	0.0866	0.361	0.778	1.55e-07	1.96e-06	-0.313	0.0687	0.565
ONC0001854	EPPTB	Preclinical	trace amine associated receptor antagonist	TAAR1			0.95	1.05	0.96	0.72	0.54	0.76	0.987	0.0551	0.673	0.117	0.41	0.805	4.52e-07	5.48e-06	-0.313	0.0138	0.326
ONC0005390	dithranol	Launched	DNA synthesis inhibitor		dermatology	psoriasis	1	1.36	1.59	1.06	0.99	0.96	1317	0.297	1003	0.0513	0.998	1	0.568	0.985	-0.313	0.103	0.614
ONC0004737	Belinostat (PXD101)	NA	NA	NA	NA	NA	0.59	0.76	0.82	0.22	0.52	0.5	0.723	0.119	0.413	0.168	0.00286	0.0383	2.4e-19	5.18e-18	-0.31	0.033	0.428
ONC0004821	Articaine HCl	NA	NA	NA	NA	NA	1.36	1.31	1	0.85	0.98	0.91	1223	0.195	0.913	0.0651	0.98	1	0.112	0.472	-0.31	0.0492	0.508
ONC0004814	TG003	Preclinical	CLK inhibitor	CLK1|CLK4|DYRK1A|DYRK1B			1.28	0.94	1.67	0.98	0.99	0.99	1297	0.365	0.987	0.00577	0.997	1	0.466	0.944	-0.31	0.14	0.649
ONC0004426	AMG319
ONC0003295	SODIUM OXYBATE	NA	NA	NA	NA	NA	1.13	1.22	1.25	0.89	0.89	0.89	1.2	0.0624	0.89	0	0.966	1	0.0578	0.295	-0.31	0.00663	0.275
ONC0000042	FRAX486	Preclinical	serine/threonine kinase inhibitor	PAK1|PAK2|PAK3|PAK4			1.09	1.34	0.97	0.81	0.8	0.86	1133	0.189	0.823	0.0321	0.882	0.993	0.00465	0.0361	-0.31	0.0503	0.512
ONC0001718	MRS1334	Preclinical	adenosine receptor antagonist	ADORA3			0.77	0.98	1.1	0.7	0.61	0.61	0.95	0.167	0.64	0.052	0.281	0.736	2.9e-08	3.84e-07	-0.31	0.0368	0.455
ONC0005453	5-hydroxyectoine	Preclinical					1.7	0.82	1.53	1.03	1.1	0.99	1.35	0.467	1.04	0.0557	0.999	1	0.769	1	-0.31	0.184	0.703
ONC0004909	Silodosin	Launched	adrenergic receptor antagonist	ADRA1A|ADRA1B|ADRA1D	urology	benign prostatic hyperplasia (BPH)	1.36	0.93	1.23	0.77	0.96	0.87	1173	0.221	0.867	0.095	0.942	1	0.0266	0.161	-0.307	0.0616	0.549
ONC0003848	dimercaptosuccinic-acid	Launched	chelating agent	DNMT1	neurology/psychiatry	metal toxicity	1.19	1.11	1.39	0.98	0.91	0.88	1.23	0.144	0.923	0.0513	0.983	1	0.145	0.552	-0.307	0.0267	0.401
ONC0005120	Selinexor (KPT-330)	NA	NA	NA	NA	NA	0.51	0.38	0.37	0.26	0.2	-0.12	0.42	0.0781	0.113	0.204	6.56e-09	2.12e-07	4.65e-42	3.08e-40	-0.307	0.0538	0.528
ONC0002674	L-732,138	Preclinical	tachykinin antagonist	TACR1|TACR2			1.48	1.27	0.8	1	0.78	0.85	1183	0.348	0.877	0.112	0.952	1	0.0376	0.214	-0.307	0.132	0.634
ONC0000265	sal003	Preclinical	eukaryotic translation initiation factor inhibitor	EIF2A			0.94	1.25	1.06	0.99	0.85	0.49	1083	0.156	0.777	0.258	0.759	0.95	0.000451	0.00413	-0.307	0.0841	0.591
ONC0001250	A12B4C3	Preclinical	polynucleotide kinase/phosphatase inhibitor	PNKP			1.1	1.29	1.2	0.83	0.79	1.05	1197	0.095	0.89	0.14	0.964	1	0.0578	0.295	-0.307	0.0208	0.37
ONC0000076	CF102	Phase 2	adenosine receptor agonist	ADORA1|ADORA2A|ADORA2B|ADORA3			0.79	1.88	1.31	1.03	1.01	1.02	1327	0.545	1.02	0.01	0.999	1	0.666	1	-0.307	0.216	0.727
ONC0001816	BRD-7389	Preclinical	ribosomal protein inhibitor	RPS6KA1|RPS6KA2|RPS6KA3			1.01	0.98	0.8	0.75	0.48	0.64	0.93	0.114	0.623	0.136	0.22	0.682	6.67e-09	9.12e-08	-0.307	0.0208	0.37
ONC0005339	MIANSERIN HYDROCHLORIDE	NA	NA	NA	NA	NA	1.28	1.42	1.25	0.97	0.95	1.11	1317	0.0907	1.01	0.0872	0.998	1	0.608	0.997	-0.307	0.00675	0.278
ONC0001190	Hexaminolevulinate (hydrochloride)	NA	NA	NA	NA	NA	1.24	1	1.28	0.87	0.92	0.81	1173	0.151	0.867	0.0551	0.942	1	0.0266	0.161	-0.307	0.0294	0.415
ONC0005090	LY2603618 (IC-83)	NA	NA	NA	NA	NA	0.41	0.27	0.27	0.07	-0.05	0.02	0.317	0.0808	0.013	0.0603	1.2e-11	5.26e-10	1.12e-51	1.97e-49	-0.303	0.004	0.23
ONC0004625	Bafetinib (INNO-406)	NA	NA	NA	NA	NA	0.91	0.65	1.17	0.54	0.52	0.76	0.91	0.26	0.607	0.133	0.167	0.597	1.44e-09	2.09e-08	-0.303	0.0852	0.594
ONC0000684	TOLAZAMIDE	Launched	ATP channel blocker	ABCC8|KCNJ1|KCNJ10|KCNJ11	endocrinology	diabetes mellitus	1.32	1.07	1.33	0.95	0.9	0.96	1.24	0.147	0.937	0.0321	0.987	1	0.196	0.658	-0.303	0.0322	0.426
ONC0000735	RGB-286638 (free base)	NA	NA	NA	NA	NA	0.33	0.42	0.44	0.21	0.02	0.05	0.397	0.0586	0.093	0.102	1.72e-09	6.08e-08	6.7e-44	5.17e-42	-0.303	0.00921	0.295
ONC0003485	Aphidicolin	Phase 1	RNA synthesis inhibitor				0.44	0.63	0.66	0.07	0.3	0.45	0.577	0.119	0.273	0.191	1.48e-05	0.000344	8.44e-29	2.5e-27	-0.303	0.0465	0.497
ONC0002813	Scopine	Launched					1	1.52	1.05	1.03	0.57	1.06	1.19	0.287	0.887	0.275	0.958	1	0.0521	0.274	-0.303	0.128	0.632
ONC0002804	parbendazole	Preclinical	tubulin polymerization inhibitor	TUBB			0.3	0.49	0.41	0.1	0.14	0.05	0.4	0.0954	0.097	0.0451	2.09e-09	7.25e-08	1.37e-43	1.01e-41	-0.303	0.00877	0.293
ONC0002109	Maribavir	Phase 3	cytomegalovirus inhibitor|protein kinase inhibitor	PYGM			1.32	1.51	1	1	0.89	1.03	1277	0.258	0.973	0.0737	0.995	1	0.386	0.893	-0.303	0.0855	0.594
ONC0004783	Droxinostat	Preclinical	HDAC inhibitor	HDAC6|HDAC8			0.94	1.08	1.65	0.98	0.89	0.9	1223	0.376	0.923	0.0493	0.98	1	0.145	0.552	-0.3	0.15	0.661
ONC0003730	Q-203	Phase 2	ATP synthase inhibitor				1.37	1.02	1.15	0.68	0.99	0.97	1.18	0.177	0.88	0.173	0.949	1	0.042	0.232	-0.3	0.052	0.521
ONC0004139	TEMOZOLOMIDE	Launched	DNA alkylating agent	MGMT	oncology	glioblastoma|astrocytoma	0.28	0.26	0.35	-0.02	0.02	-0.01	0.297	0.0473	-0.003	0.0208	3.16e-12	1.51e-10	2.22e-53	4.62e-51	-0.3	0.00151	0.154
ONC0004339	Erastin	Preclinical	ion channel antagonist	VDAC2			0.71	1.28	1.53	0.83	0.97	0.82	1173	0.42	0.873	0.0839	0.942	1	0.0336	0.195	-0.3	0.171	0.687
ONC0004315	Mdivi-1	Preclinical	dynamin inhibitor	DNM1			1.18	1.42	1.02	0.98	0.89	0.85	1207	0.201	0.907	0.0666	0.971	1	0.0939	0.419	-0.3	0.0558	0.532
ONC0005073	NPS-2143 (SB262470)	NA	NA	NA	NA	NA	1.38	1.33	1.19	0.94	0.99	1.07	1.3	0.0985	1	0.0656	0.997	1	0.548	0.978	-0.3	0.00798	0.29
ONC0004933	cx-4945 (Silmitasertib)	NA	NA	NA	NA	NA	1.15	1.39	1.43	1.15	0.89	1.03	1323	0.151	1023	0.13	0.999	1	0.684	1	-0.3	0.0306	0.418
ONC0004604	LY335979 (Zosuquidar trihydrochloride)	NA	NA	NA	NA	NA	1.2	1.68	1.07	0.97	1.06	1.02	1317	0.321	1017	0.0451	0.998	1	0.647	1	-0.3	0.123	0.63
ONC0001120	R112	Phase 1	SYK inhibitor	SYK			1.04	0.95	1	0.68	0.79	0.62	0.997	0.0451	0.697	0.0862	0.448	0.825	2.66e-06	3.04e-05	-0.3	0.00632	0.27
ONC0003362	Landiolol HCl	NA	NA	NA	NA	NA	0.99	1.26	1.05	0.76	0.89	0.76	1.1	0.142	0.803	0.0751	0.806	0.968	0.00181	0.0153	-0.297	0.0242	0.391
ONC0000746	Rimegepant	Launched	calcitonin antagonist	CALCA			1.27	1.51	1.18	0.99	1.1	0.98	1.32	0.171	1023	0.0666	0.999	1	0.684	1	-0.297	0.0399	0.471
ONC0002596	4-carboxy-3-hydroxyphenylglycine-(RS)	Preclinical	glutamate receptor agonist|glutamate receptor antagonist	GRM1			0.9	1.35	0.87	0.51	0.89	0.83	1.04	0.269	0.743	0.204	0.613	0.897	6.33e-05	0.000644	-0.297	0.104	0.614
ONC0001144	Omberacetam	NA	NA	NA	NA	NA	1.28	1.61	1.13	1.01	1.04	1.08	1.34	0.246	1043	0.0351	0.999	1	0.785	1	-0.297	0.0845	0.593
ONC0004777	WHI-P154	Preclinical	JAK inhibitor	EGFR|JAK1|JAK2|JAK3			0.9	1.56	0.82	0.75	0.8	0.85	1093	0.406	0.8	0.05	0.788	0.963	0.00154	0.0131	-0.293	0.169	0.687
ONC0004320	SGC 0946	NA	NA	NA	NA	NA	1.02	1.27	1.35	0.96	0.93	0.87	1213	0.172	0.92	0.0458	0.975	1	0.133	0.526	-0.293	0.0448	0.493
ONC0004929	Enzastaurin (LY317615)	NA	NA	NA	NA	NA	1.3	1.21	1.1	1.05	0.79	0.89	1203	0.1	0.91	0.131	0.969	1	0.103	0.446	-0.293	0.0202	0.37
ONC0000689	RITODRINE HYDROCHLORIDE	NA	NA	NA	NA	NA	0.85	0.97	0.98	0.38	0.58	0.96	0.933	0.0723	0.64	0.295	0.229	0.688	2.9e-08	3.84e-07	-0.293	0.111	0.622
ONC0000238	IKK-16	Preclinical	IKK inhibitor	IKBKB			1.2	0.99	1.3	0.93	0.88	0.8	1163	0.158	0.87	0.0656	0.93	1	0.0299	0.177	-0.293	0.0343	0.44
ONC0002695	TC-Mps1-12	Preclinical	monopolar spindle 1 kinase inhibitor	TTK			0.75	0.73	0.79	0.36	0.44	0.59	0.757	0.0306	0.463	0.117	0.0073	0.0811	1.87e-16	3.59e-15	-0.293	0.0207	0.37
[truncated: 5,256 more rows]

## Sheet: Hits
#	Compound_Id	onc.name	rep.clinical_phase	rep.moa	rep.target	rep.disease_area	rep.indication	b,c_diff	b,c_fdr
[truncated: 74 more rows]

## Sheet: Hits for validation
#	Compound_Id	onc.name	rep.clinical_phase	rep.moa	rep.target	rep.disease_area	rep.indication	b,c_diff	b,c_fdr
[truncated: 50 more rows]
