# Supplementary material
Source: Research Square preprint supplement (doi:10.21203/rs.3.rs-9858448/v1)
Supplement: Supplementary file 4 [file 71701eb5460187f3f02eeac5.xlsx]

## Sheet: dataset2 Conc Values small libr
#	Compound	Target	Type	Range (µM)	c10(high)	c09	c08	c07	c06	c05	c04	c03	c02	c01(low)
1	Bortezomib	Proteasome	Proteotoxic Stress	0.001 - 1	0.9999	0.449979	0.214995	0.099999	0.0474998	0.0225	0.00999999	0.005	0.0025	0.001625
2	Ixazomib	Proteasome		0.001 - 1	0.9999	0.449979	0.214995	0.099999	0.0474998	0.0225	0.00999999	0.005	0.0025	0.001625
3	Carfilzomib	Proteasome		0.001 - 1	0.9999	0.449979	0.214995	0.099999	0.0474998	0.0225	0.00999999	0.005	0.0025	0.001625
4	Oprozomib	Proteasome		0.001 - 2	1.9996	0.949912	0.429981	0.199996	0.0924991	0.0424998	0.02	0.00999999	0.005	0.001625
5	GSK2606414	PERK		0.1 - 10	9.99001	5.99641	3.59871	2.14954	1.29983	0.749942	0.449979	0.277492	0.167497	0.099999
6	GSK2656157	PERK		0.1 - 10	9.99001	5.99641	3.59871	2.14954	1.29983	0.749942	0.449979	0.277492	0.167497	0.099999
7	kira6	IRE1		0.5 - 15	14.9775	10.2894	7.04504	4.84766	3.29891	2.24949	1.54976	1.04989	0.749945	0.499975
8	Epigallocatechin gallate (EGCG)	GRP78		0.1 - 20	20.0099	11.0877	6.14621	3.39884	1.89964	1.04989	0.599965	0.324989	0.179997	0.099999
9	Olaparib (AZD 2281)	PARP	DNA Damage Stress	0.1 - 10	9.99001	5.99641	3.59871	2.14954	1.29983	0.749942	0.449979	0.277492	0.167497	0.099999
10	Talazoparib	PARP		0.1 - 20	20.0099	11.0877	6.14621	3.39884	1.89964	1.04989	0.599965	0.324989	0.179997	0.099999
11	Berzosertib (VE-822)	ATR		0.01 - 10	9.99001	4.64784	2.14954	0.9999	0.449979	0.214995	0.099999	0.0474998	0.0225	0.00999999
12	AZD 6738	ATR		0.1 - 10	9.99001	5.99641	3.59871	2.14954	1.29983	0.749942	0.449979	0.277492	0.167497	0.099999
13	Rabusertib (LY 2603618)	CHK1		0.05 - 10	9.99001	5.54692	3.09905	1.69971	0.94991	0.549971	0.292491	0.162497	0.0899992	0.0499998
14	CHK2 inhibitor 2	CHK2		0.1 - 10	9.99001	5.99641	3.59871	2.14954	1.29983	0.749942	0.449979	0.277492	0.167497	0.099999
15	CGK 733	ATR/ATM		0.1 - 10	9.99001	5.99641	3.59871	2.14954	1.29983	0.749942	0.449979	0.277492	0.167497	0.099999
16	Torin 2	DNA-PK		0.005 - 10	9.99001	4.29815	1.84966	0.799937	0.339988	0.147498	0.0624996	0.0274999	0.0125	0.005
17	Etoposide	Topoisomarase		0.01 - 10	9.99001	4.64784	2.14954	0.9999	0.449979	0.214995	0.099999	0.0474998	0.0225	0.00999999
18	5-Fluorouracil	Antimetabolite		0.1 - 20	20.0099	11.0877	6.14621	3.39884	1.89964	1.04989	0.599965	0.324989	0.179997	0.099999
19	XL 413	CDC7		0.01 - 10	9.99001	4.64784	2.14954	0.9999	0.449979	0.214995	0.099999	0.0474998	0.0225	0.00999999
20	Carboplatin	Alkylating		0.1 -20	20.0099	11.0877	6.14621	3.39884	1.89964	1.04989	0.599965	0.324989	0.179997	0.099999
21	KU-60019	ATM		0.1 - 10	9.99001	5.99641	3.59871	2.14954	1.29983	0.749942	0.449979	0.277492	0.167497	0.099999
22	Panobinostat	HDAC	Oxidative Stress	0.001 - 5	4.9975	1.94962	0.749944	0.292491	0.112499	0.0449998	0.0175	0.00749999	0.0025	0.001625
23	OSU 0312	PDK1		0.1 - 10	9.99001	5.99641	3.59871	2.14954	1.29983	0.749942	0.449979	0.277492	0.167497	0.099999
24	Vorinostat	HDAC		0.1 - 10	9.99001	5.99641	3.59871	2.14954	1.29983	0.749942	0.449979	0.277492	0.167497	0.099999
25	Acetazolamide	CA		0.1- 20	20.0099	11.0877	6.14621	3.39884	1.89964	1.04989	0.599965	0.324989	0.179997	0.099999
26	Decitabine	DNMT1		0.1 - 10	9.99001	5.99641	3.59871	2.14954	1.29983	0.749942	0.449979	0.277492	0.167497	0.099999
27	BAY 1217389	MPS1 (SAC)	Mitotic Stress	0.001 - 5	4.9975	1.94962	0.749944	0.292491	0.112499	0.0449998	0.0175	0.00749999	0.0025	0.001625
28	Volasertib	PLK1		0.01 - 10	9.99001	4.64784	2.14954	0.9999	0.449979	0.214995	0.099999	0.0474998	0.0225	0.00999999
29	Alisertib	Aurora A		0.005 - 10	9.99001	4.29815	1.84966	0.799937	0.339988	0.147498	0.0624996	0.0274999	0.0125	0.005
30	Barasertib	Aurora B		0.005 - 10	9.99001	4.29815	1.84966	0.799937	0.339988	0.147498	0.0624996	0.0274999	0.0125	0.005
31	Tozasertib	Aurora A/B/C		0.005 - 10	9.99001	4.29815	1.84966	0.799937	0.339988	0.147498	0.0624996	0.0274999	0.0125	0.005
32	YM 155	Survivin		0.001 - 5	4.9975	1.94962	0.749944	0.292491	0.112499	0.0449998	0.0175	0.00749999	0.0025	0.001625
33	BI 2536	PLK		0.001 - 5	4.9975	1.94962	0.749944	0.292491	0.112499	0.0449998	0.0175	0.00749999	0.0025	0.001625
34	Chloroquine	Endosome acidification	Metabolic Stress	0.1 -20	20.0099	11.0877	6.14621	3.39884	1.89964	1.04989	0.599965	0.324989	0.179997	0.099999
35	Depagliflozin	SGLT2		0.1 - 10	20.0099	13.2823	8.79225	5.84658	3.89849	2.59933	1.69971	1.14987	0.749944	0.499975
36	Rapamycin	mTOR		0.001 - 5	9.99001	4.29815	1.84966	0.799937	0.339988	0.147498	0.0624996	0.0274999	0.0125	0.005
37	Quercetin	PI3K		0.1 - 20	24.9874	16.1738	10.489	6.79539	4.39807	2.84919	1.84966	1.19986	0.749942	0.499975
38	CB 839	Glutaminase		0.01 - 10	9.99001	4.64784	2.14954	0.9999	0.449979	0.214995	0.099999	0.0474998	0.0225	0.00999999
39	ND 646	ACC1/ACC2		0.01 - 10	20.0099	11.0877	6.14621	3.39884	1.89964	1.04989	0.599965	0.324989	0.179997	0.099999
40	Compound 3k	PKM2		0.01 - 10	9.99001	4.64784	2.14954	0.9999	0.449979	0.214995	0.099999	0.0474998	0.0225	0.00999999
41	AZD 8055	mTOR		0.01 - 10	9.99001	4.64784	2.14954	0.9999	0.449979	0.214995	0.099999	0.0474998	0.0225	0.00999999
42	ABT-737	Pan Bcl	Apoptosis Evasion	0.01 - 10	9.99001	4.64784	2.14954	0.9999	0.449979	0.214995	0.099999	0.0474998	0.0225	0.00999999
43	ABT-263	Pan Bcl		0.01 - 10	9.99001	4.64784	2.14954	0.9999	0.449979	0.214995	0.099999	0.0474998	0.0225	0.00999999
44	ABT-199	Bcl-2		0.01 - 10	9.99001	4.64784	2.14954	0.9999	0.449979	0.214995	0.099999	0.0474998	0.0225	0.00999999
45	Gefitinib	EGFR	Control	0.005 - 10	9.99001	3.89849	1.49977	0.599965	0.227495	0.0874992	0.0349999	0.0125	0.005	0.001625
