# Supplementary material
Source: Research Square preprint supplement (doi:10.21203/rs.3.rs-9858448/v1)
Supplement: Supplementary file 5 [file e71682cd5198326f9ef23e2b.xlsx]

## Sheet: analysis_result_b_auc
#	drugName	rep.clinical_phase	rep.moa	rep.target	rep.disease_area	rep.indication	r1_diff	r2_diff	r3_diff	Average	sd		Notes
1	JNJ-10397049	Preclinical	orexin receptor antagonist	HCRTR1|HCRTR2			-0.78	-0.85	-0.84	-0.823333	0.0309121		test for validation
2	GW-583340	Preclinical	EGFR inhibitor	EGFR|ERBB2			-0.73	-0.88		-0.805	0.075
3	Ko 143	NA	NA	NA	NA	NA	-0.46	-1.41	-0.48	-0.783333	0.443195		known ABCG2i
4	Elacridar	Phase 1	P glycoprotein inhibitor	ABCB1			-0.74	-0.66	-0.57	-0.656667	0.0694422		known ABCG2i
5	GNF-5837	Preclinical	growth factor receptor inhibitor	NTRK1|NTRK2|NTRK3			-0.71	-0.56	-0.7	-0.656667	0.0684755		test for validation
6	Lapatinib (GW-572016) Ditosylate	NA	NA	NA	NA	NA	-0.69	-0.63	-0.65	-0.656667	0.0249444		test for validation
7	BMS-599626	Phase 1	EGFR inhibitor|protein tyrosine kinase inhibitor	EGFR|ERBB2|ERBB4			-0.62	-0.66	-0.67	-0.65	0.0216025		test for validation
8	KHK-IN-1 (hydrochloride)	NA	NA	NA	NA	NA	-0.61	-0.76	-0.57	-0.646667	0.0817856
9	Sunitinib	Launched	FLT3 inhibitor|KIT inhibitor|PDGFR tyrosine kinase receptor inhibitor|RET tyrosine kinase inhibitor|VEGFR inhibitor	CSF1R|FGFR1|FLT1|FLT3|FLT4|KDR|KIT|PDGFRA|PDGFRB|RET	oncology	gastrointestinal stromal tumors (GIST)|renal cell carcinoma (RCC)|neuroendocrine tumors of pancreatic origin (PNET)	-0.66	-0.74	-0.52	-0.64	0.0909212		test for validation
10	Afatinib (dimaleate)	NA	NA	NA	NA	NA	-0.65	-0.69	-0.56	-0.633333	0.054365		test for validation
11	RWJ-50271	Preclinical	integrin inhibitor	ICAM1			-0.49	-0.89	-0.51	-0.63	0.184029
12	TC-G-1004	Preclinical	adenosine receptor antagonist	ADORA2A			-0.63	-0.75	-0.5	-0.626667	0.102089
13	PQ-401	Preclinical	IGF-1 inhibitor	IGF1R			-0.38	-0.84	-0.65	-0.623333	0.188739
14	SGC-CBP30	Preclinical	bromodomain inhibitor	CREBBP|EP300			-0.53	-0.76	-0.55	-0.613333	0.10403
15	WYE-687	Preclinical	mTOR inhibitor	MTOR			-0.45	-0.55	-0.53	-0.51	0.0432049
16	Flumatinib (mesylate)	NA	NA	NA	NA	NA	-0.6	-0.5	-0.37	-0.49	0.094163
17	YM201636	Preclinical	PI3K inhibitor				-0.41	-0.51	-0.49	-0.47	0.0432049
18	SB-216641	Preclinical	serotonin receptor antagonist	HTR1A|HTR1B|HTR1D|HTR2A|HTR2B|HTR2C			-0.39	-0.45	-0.52	-0.453333	0.0531246
19	AST-1306	Phase 1	EGFR inhibitor	EGFR|ERBB2			-0.6	-0.5	-0.23	-0.443333	0.156276
20	SB-228357	Preclinical	serotonin receptor antagonist	HTR2A|HTR2B|HTR2C			-0.37	-0.52	-0.43	-0.44	0.0616441
21	ZM-323881	Preclinical	VEGFR inhibitor	KDR				-0.5	-0.37	-0.435	0.065
22	Ledipasvir	Launched	HCV inhibitor		infectious disease	hepatitis C	-0.4	-0.53	-0.32	-0.416667	0.0865384
23	VX-11e	Preclinical	MAP kinase inhibitor	MAPK1			-0.46	-0.39	-0.38	-0.41	0.0355903
24	RS-39604	Preclinical	serotonin receptor antagonist	HTR4			-0.31	-0.52	-0.38	-0.403333	0.0873053
25	Elbasvir	Launched	HCV inhibitor		infectious disease	hepatitis C	-0.38	-0.53	-0.29	-0.4	0.0989949
26	Ozanimod	Phase 3	sphingosine 1-phosphate receptor agonist	S1PR1			-0.38	-0.45	-0.3	-0.376667	0.0612826
27	PD168393	Preclinical	EGFR inhibitor	EGFR|ERBB2|SRC			-0.35	-0.58	-0.18	-0.37	0.163911
28	SB-334867	Preclinical	orexin receptor antagonist	HCRTR1|HCRTR2			-0.28	-0.42		-0.35	0.07
29	PF-431396	Preclinical	focal adhesion kinase inhibitor	PTK2|PTK2B			-0.28	-0.37	-0.33	-0.326667	0.0368179
30	YM-90709	Preclinical	IL5 inhibitor	CSF2RB|IL5RA			-0.33	-0.33	-0.32	-0.326667	0.00471405
31	SR-3306	Preclinical	JNK inhibitor	MAPK10|MAPK8|MAPK9			-0.44	-0.34	-0.18	-0.32	0.107083
32	BAY 61-3606 (dihydrochloride)	NA	NA	NA	NA	NA	-0.17	-0.43	-0.35	-0.316667	0.10873
33	Erlotinib(OSI-744)	NA	NA	NA	NA	NA	-0.17	-0.27	-0.34	-0.26	0.0697615
34	Varlitinib	NA	NA	NA	NA	NA	-0.35	-0.22	-0.21	-0.26	0.0637704
35	URMC-099	Preclinical	mixed lineage kinase inhibitor	CDKL2|DAPK3|FLT3|LRRK2|MAP3K10|MAP3K11|MAP3K2|MAP3K9|SRPK2			-0.25	-0.46	-0.06	-0.256667	0.163367
36	G007-LK	Preclinical	tankyrase inhibitor	TNKS|TNKS2			-0.15	-0.31	-0.3	-0.253333	0.0731817
37	TG101209	Preclinical	JAK inhibitor	JAK2|JAK3			-0.1	-0.41	-0.17	-0.226667	0.132749
38	reversan	Preclinical	MRP inhibitor	ABCC1			-0.16	-0.28	-0.06	-0.166667	0.0899383
39	APY0201	Preclinical	phosphoinositide dependent kinase inhibitor	IL12A|IL12B|PIKFYVE			-0.05	-0.27	-0.17	-0.163333	0.0899383
40	SB-243213	Phase 1	serotonin receptor inverse agonist	HTR2A|HTR2B|HTR2C|HTR6			-0.13	-0.1	-0.23	-0.153333	0.0555778
41	ZK-93423	Phase 3	benzodiazepine receptor agonist	GABRA1|GABRA2|GABRA3|GABRA5|GABRB2|GABRG2			-0.05	-0.26	-0.13	-0.146667	0.0865384
42	AZ-628	Preclinical	RAF inhibitor	BRAF|RAF1			-0.22	-0.27	0.05	-0.146667	0.140554
43	LUFENURON	Launched	chitin inhibitor		infectious disease	flea control	-0.08	-0.11	-0.23	-0.14	0.0648074
44	Mps-BAY-2a	Preclinical	monopolar spindle 1 kinase inhibitor	TTK			0.07	-0.32	-0.09	-0.113333	0.160069
45	NVP-TAE226	Preclinical	protein tyrosine kinase inhibitor	PTK2			-0.11	-0.21	0.04	-0.0933333	0.10274
46	GSK2578215A	Preclinical	leucine rich repeat kinase inhibitor	LRRK2			0.11	-0.2	-0.13	-0.0733333	0.132749
47	NICLOSAMIDE	Launched	DNA replication inhibitor|STAT inhibitor	STAT3	infectious disease	tapeworm	-0.04	-0.06	0.03	-0.0233333	0.0385861
48	GS-6201	Phase 1	adenosine receptor antagonist	ADORA1|ADORA2A|ADORA2B|ADORA3			-0.05	-0.09	0.22	0.0266667	0.137679
49	HKI-357	Phase 1	EGFR inhibitor	EGFR			0.12	0.04	0	0.0533333	0.0498888
50	AZD8330	Phase 1	MEK inhibitor	MAP3K1			0.01	-0.04	0.21	0.06	0.108012
